# Supplementary material for: Prognostic potential of PRPF3 in hepatocellular carcinoma
Source: PubMed Central journal article supplement (PMC6977647; doi:10.18632/aging.102665), 2020-01-11
Supplement: aging-12-102665-s001..pdf [file aging-12-102665-s001..pdf]

**Supplementary Table 8. Functional annotation of PRPF3 AMP co-occurrence genes.**

| GO term                                                                                                                   | Total | Expected | Hits | P-Value  | FDR      |
|---------------------------------------------------------------------------------------------------------------------------|-------|----------|------|----------|----------|
| Acute inflammatory response                                                                                               | 118   | 5.33     | 18   | 5.47E-06 | 4.49E-03 |
| Immune effector process                                                                                                   | 576   | 26       | 47   | 6.15E-05 | 2.25E-02 |
| Adaptive immune response                                                                                                  | 241   | 10.9     | 25   | 9.36E-05 | 2.25E-02 |
| Regulation of response to external stimulus                                                                               | 461   | 20.8     | 39   | 1.23E-04 | 2.25E-02 |
| Adaptive immune response based on somatic recombination of immune receptors built from immunoglobulin superfamily domains | 218   | 9.84     | 23   | 1.37E-04 | 2.25E-02 |
| Leukocyte migration                                                                                                       | 309   | 13.9     | 27   | 8.11E-04 | 1.08E-01 |
| Regulation of immune effector process                                                                                     | 249   | 11.2     | 23   | 9.19E-04 | 1.08E-01 |
| Inflammatory response                                                                                                     | 569   | 25.7     | 42   | 1.18E-03 | 1.21E-01 |
| Protein maturation                                                                                                        | 153   | 6.91     | 16   | 1.51E-03 | 1.35E-01 |
| Protein processing                                                                                                        | 140   | 6.32     | 15   | 1.64E-03 | 1.35E-01 |
| Immune response                                                                                                           | 1430  | 64.4     | 87   | 2.14E-03 | 1.57E-01 |
| Regulation of defense response                                                                                            | 519   | 23.4     | 38   | 2.30E-03 | 1.57E-01 |
| Protein secretion                                                                                                         | 196   | 8.85     | 18   | 3.38E-03 | 1.93E-01 |
| Striated muscle contraction                                                                                               | 108   | 4.88     | 12   | 3.43E-03 | 1.93E-01 |
| Positive regulation of hydrolase activity                                                                                 | 497   | 22.4     | 36   | 3.54E-03 | 1.93E-01 |
| Cytokine secretion                                                                                                        | 110   | 4.97     | 12   | 3.99E-03 | 1.93E-01 |
| Protein autoprocessing                                                                                                    | 8     | 0.361    | 3    | 4.32E-03 | 1.93E-01 |
| Positive regulation of immune system process                                                                              | 739   | 33.4     | 49   | 4.41E-03 | 1.93E-01 |
| Regulation of immune system process                                                                                       | 1190  | 53.9     | 73   | 4.47E-03 | 1.93E-01 |
| Regulation of muscle contraction                                                                                          | 127   | 5.73     | 13   | 4.84E-03 | 1.98E-01 |
| Response to carbohydrate stimulus                                                                                         | 143   | 6.46     | 14   | 5.26E-03 | 2.05E-01 |
| Production of molecular mediator of immune response                                                                       | 130   | 5.87     | 13   | 5.89E-03 | 2.13E-01 |
| Negative regulation of immune system process                                                                              | 207   | 9.34     | 18   | 5.98E-03 | 2.13E-01 |
| Keratinocyte differentiation                                                                                              | 117   | 5.28     | 12   | 6.55E-03 | 2.24E-01 |
| Response to wounding                                                                                                      | 1310  | 59.3     | 78   | 6.95E-03 | 2.28E-01 |
| Leukocyte chemotaxis                                                                                                      | 150   | 6.77     | 14   | 7.96E-03 | 2.51E-01 |
| Response to bacterium                                                                                                     | 385   | 17.4     | 28   | 8.96E-03 | 2.72E-01 |
| Regulation of angiogenesis                                                                                                | 169   | 7.63     | 15   | 9.61E-03 | 2.81E-01 |
| Epidermis development                                                                                                     | 319   | 14.4     | 24   | 1.01E-02 | 2.85E-01 |
| Response to abiotic stimulus                                                                                              | 876   | 39.5     | 54   | 1.20E-02 | 3.23E-01 |
| Negative regulation of MAP kinase activity                                                                                | 69    | 3.11     | 8    | 1.22E-02 | 3.23E-01 |
| Regulation of immune response                                                                                             | 727   | 32.8     | 46   | 1.28E-02 | 3.28E-01 |
| Positive regulation of immune response                                                                                    | 487   | 22       | 33   | 1.32E-02 | 3.28E-01 |
| Regulation of G protein coupled receptor protein signaling pathway                                                        | 129   | 5.82     | 12   | 1.38E-02 | 3.32E-01 |
| B cell activation                                                                                                         | 194   | 8.76     | 16   | 1.48E-02 | 3.46E-01 |
| Response to hypoxia                                                                                                       | 245   | 11.1     | 19   | 1.54E-02 | 3.51E-01 |
| Defense response to bacterium                                                                                             | 152   | 6.86     | 13   | 2.02E-02 | 4.46E-01 |
| Response to biotic stimulus                                                                                               | 749   | 33.8     | 46   | 2.07E-02 | 4.46E-01 |
| Amyloid precursor protein metabolic process                                                                               | 24    | 1.08     | 4    | 2.13E-02 | 4.48E-01 |
| Cellular monovalent inorganic cation homeostasis                                                                          | 36    | 1.63     | 5    | 2.18E-02 | 4.48E-01 |
| Response to other organism                                                                                                | 716   | 32.3     | 44   | 2.31E-02 | 4.61E-01 |
| Cell migration                                                                                                            | 1050  | 47.6     | 61   | 2.62E-02 | 5.12E-01 |

|                                                                |      |       |    |          |          |
|----------------------------------------------------------------|------|-------|----|----------|----------|
| Monovalent inorganic cation homeostasis                        | 80   | 3.61  | 8  | 2.76E-02 | 5.26E-01 |
| Positive regulation of catalytic activity                      | 1070 | 48.3  | 61 | 3.35E-02 | 6.25E-01 |
| Positive regulation of NF_kappaB transcription factor activity | 115  | 5.19  | 10 | 3.51E-02 | 6.35E-01 |
| Inactivation of MAPK activity                                  | 28   | 1.26  | 4  | 3.56E-02 | 6.35E-01 |
| Regulation of lymphocyte activation                            | 360  | 16.3  | 24 | 3.68E-02 | 6.42E-01 |
| Negative regulation of angiogenesis                            | 56   | 2.53  | 6  | 3.97E-02 | 6.67E-01 |
| Regulation of cell migration                                   | 456  | 20.6  | 29 | 3.99E-02 | 6.67E-01 |
| Positive regulation of defense response                        | 273  | 12.3  | 19 | 4.10E-02 | 6.72E-01 |
| Regulation of cellular pH                                      | 30   | 1.35  | 4  | 4.45E-02 | 7.15E-01 |
| Establishment of protein localization                          | 1460 | 65.7  | 79 | 4.65E-02 | 7.33E-01 |
| Interleukin_1 secretion                                        | 31   | 1.4   | 4  | 4.93E-02 | 7.53E-01 |
| <b>Pathway</b>                                                 |      |       |    |          |          |
| Complement and coagulation cascades                            | 79   | 3.42  | 12 | 1.33E-04 | 3.00E-02 |
| Systemic lupus erythematosus                                   | 133  | 5.76  | 16 | 1.89E-04 | 3.00E-02 |
| Leishmaniasis                                                  | 74   | 3.2   | 10 | 1.23E-03 | 1.30E-01 |
| Staphylococcus aureus infection                                | 68   | 2.94  | 9  | 2.48E-03 | 1.60E-01 |
| ECM-receptor interaction                                       | 82   | 3.55  | 10 | 2.70E-03 | 1.60E-01 |
| Hematopoietic cell lineage                                     | 97   | 4.2   | 11 | 3.02E-03 | 1.60E-01 |
| Fc gamma R-mediated phagocytosis                               | 91   | 3.94  | 10 | 5.76E-03 | 2.62E-01 |
| Small cell lung cancer                                         | 93   | 4.03  | 10 | 6.71E-03 | 2.67E-01 |
| Aldosterone synthesis and secretion                            | 98   | 4.24  | 10 | 9.62E-03 | 3.11E-01 |
| Adrenergic signaling in cardiomyocytes                         | 145  | 6.28  | 13 | 9.94E-03 | 3.11E-01 |
| Hypertrophic cardiomyopathy (HCM)                              | 85   | 3.68  | 9  | 1.09E-02 | 3.11E-01 |
| Insulin secretion                                              | 86   | 3.72  | 9  | 1.17E-02 | 3.11E-01 |
| Terpenoid backbone biosynthesis                                | 22   | 0.953 | 4  | 1.36E-02 | 3.33E-01 |
| Malaria                                                        | 49   | 2.12  | 6  | 1.83E-02 | 4.16E-01 |
| Amoebiasis                                                     | 96   | 4.16  | 9  | 2.28E-02 | 4.28E-01 |
| Tuberculosis                                                   | 179  | 7.75  | 14 | 2.31E-02 | 4.28E-01 |
| Alcoholism                                                     | 180  | 7.79  | 14 | 2.41E-02 | 4.28E-01 |
| Cell adhesion molecules (CAMs)                                 | 146  | 6.32  | 12 | 2.42E-02 | 4.28E-01 |
| PI3K-Akt signaling pathway                                     | 354  | 15.3  | 23 | 3.31E-02 | 5.54E-01 |
| VEGF signaling pathway                                         | 59   | 2.55  | 6  | 4.13E-02 | 6.04E-01 |
| Dilated cardiomyopathy                                         | 91   | 3.94  | 8  | 4.28E-02 | 6.04E-01 |
| Gastric acid secretion                                         | 75   | 3.25  | 7  | 4.29E-02 | 6.04E-01 |
| Ras signaling pathway                                          | 232  | 10    | 16 | 4.39E-02 | 6.04E-01 |
| Necroptosis                                                    | 162  | 7.01  | 12 | 4.82E-02 | 6.04E-01 |
| Focal adhesion                                                 | 199  | 8.62  | 14 | 4.98E-02 | 6.04E-01 |
