# Supplementary material for: Prognostic potential of PRPF3 in hepatocellular carcinoma
Source: publisher site journal article supplement (doi:10.18632/aging.102665), 2020-01-11
Supplement: Supplementary file [file aging-v12i1-102665-supplementary-material-SD2.pdf]

**Supplementary Table 1. PRPF3 co-expressed genes.**

| Query    | Correlation coefficient | P-value  | FDR (BH) |
|----------|-------------------------|----------|----------|
| A1BG     | -0.2062                 | 6.30E-05 | 4.11E-04 |
| A1CF     | -0.0253                 | 6.27E-01 | 7.35E-01 |
| A2BP1    | 0.1980                  | 1.23E-04 | 7.30E-04 |
| A2LD1    | -0.0994                 | 5.57E-02 | 1.17E-01 |
| A2ML1    | -0.0779                 | 1.34E-01 | 2.33E-01 |
| A2M      | -0.0751                 | 1.49E-01 | 2.52E-01 |
| A4GALT   | 0.0087                  | 8.67E-01 | 9.15E-01 |
| A4GNT    | 0.2223                  | 1.54E-05 | 1.23E-04 |
| AAA1     | 0.1911                  | 2.13E-04 | 1.16E-03 |
| AAAS     | 0.1507                  | 3.61E-03 | 1.26E-02 |
| AACSL    | 0.0331                  | 5.25E-01 | 6.48E-01 |
| AACS     | 0.1716                  | 9.01E-04 | 3.93E-03 |
| AADAACL2 | 0.0535                  | 3.04E-01 | 4.33E-01 |
| AADAACL3 | 0.1340                  | 9.79E-03 | 2.87E-02 |
| AADAACL4 | 0.0328                  | 5.29E-01 | 6.52E-01 |
| AADAC    | -0.1774                 | 5.98E-04 | 2.76E-03 |
| AADAT    | -0.2116                 | 3.97E-05 | 2.78E-04 |
| AAGAB    | 0.0314                  | 5.47E-01 | 6.67E-01 |
| AAK1     | 0.0727                  | 1.62E-01 | 2.69E-01 |
| AAMP     | 0.0017                  | 9.74E-01 | 9.83E-01 |
| AANAT    | 0.0377                  | 4.69E-01 | 5.98E-01 |
| AARS2    | 0.1865                  | 3.04E-04 | 1.58E-03 |
| AARSD1   | 0.1626                  | 1.68E-03 | 6.65E-03 |
| AARS     | -0.0934                 | 7.22E-02 | 1.44E-01 |
| AASDHPPT | -0.1122                 | 3.07E-02 | 7.28E-02 |
| AASDH    | 0.0452                  | 3.85E-01 | 5.19E-01 |
| AASS     | -0.3009                 | 3.35E-09 | 6.99E-08 |
| AATF     | 0.3318                  | 5.56E-11 | 1.73E-09 |
| AATK     | 0.0666                  | 2.01E-01 | 3.17E-01 |
| ABAT     | -0.2506                 | 1.01E-06 | 1.15E-05 |
| ABCA10   | 0.0398                  | 4.45E-01 | 5.76E-01 |
| ABCA11P  | 0.2300                  | 7.62E-06 | 6.61E-05 |
| ABCA12   | 0.1000                  | 5.43E-02 | 1.15E-01 |
| ABCA13   | -0.0074                 | 8.88E-01 | 9.28E-01 |
| ABCA17P  | 0.0949                  | 6.78E-02 | 1.37E-01 |
| ABCA1    | -0.0283                 | 5.87E-01 | 7.02E-01 |
| ABCA2    | 0.0195                  | 7.08E-01 | 8.00E-01 |
| ABCA3    | 0.0124                  | 8.12E-01 | 8.76E-01 |
| ABCA4    | 0.1115                  | 3.18E-02 | 7.49E-02 |
| ABCA5    | 0.0448                  | 3.89E-01 | 5.22E-01 |
| ABCA6    | -0.2189                 | 2.10E-05 | 1.61E-04 |
| ABCA7    | -0.0075                 | 8.86E-01 | 9.27E-01 |

|         |         |          |          |
|---------|---------|----------|----------|
| ABCA8   | -0.3029 | 2.60E-09 | 5.54E-08 |
| ABCA9   | -0.2432 | 2.13E-06 | 2.20E-05 |
| ABCB10  | 0.0886  | 8.84E-02 | 1.68E-01 |
| ABCB11  | -0.1550 | 2.75E-03 | 1.01E-02 |
| ABCB1   | -0.2567 | 5.36E-07 | 6.51E-06 |
| ABCB4   | -0.2676 | 1.67E-07 | 2.31E-06 |
| ABCB5   | 0.1343  | 9.62E-03 | 2.83E-02 |
| ABCB6   | 0.0672  | 1.96E-01 | 3.12E-01 |
| ABCB7   | -0.0121 | 8.17E-01 | 8.80E-01 |
| ABCB8   | -0.2210 | 1.74E-05 | 1.36E-04 |
| ABCB9   | 0.0914  | 7.87E-02 | 1.54E-01 |
| ABCC10  | 0.2186  | 2.16E-05 | 1.65E-04 |
| ABCC11  | -0.1083 | 3.70E-02 | 8.47E-02 |
| ABCC12  | 0.0631  | 2.25E-01 | 3.47E-01 |
| ABCC13  | 0.1093  | 3.54E-02 | 8.17E-02 |
| ABCC1   | 0.1049  | 4.35E-02 | 9.65E-02 |
| ABCC2   | -0.1057 | 4.19E-02 | 9.35E-02 |
| ABCC3   | 0.0208  | 6.90E-01 | 7.86E-01 |
| ABCC4   | 0.0857  | 9.92E-02 | 1.85E-01 |
| ABCC5   | 0.2116  | 3.99E-05 | 2.79E-04 |
| ABCC6P1 | -0.0726 | 1.63E-01 | 2.70E-01 |
| ABCC6P2 | 0.0571  | 2.73E-01 | 4.00E-01 |
| ABCC6   | -0.2056 | 6.64E-05 | 4.30E-04 |
| ABCC8   | 0.0746  | 1.51E-01 | 2.56E-01 |
| ABCC9   | -0.2356 | 4.48E-06 | 4.23E-05 |
| ABCD1   | 0.2686  | 1.50E-07 | 2.10E-06 |
| ABCD2   | -0.0691 | 1.84E-01 | 2.97E-01 |
| ABCD3   | -0.1206 | 2.01E-02 | 5.16E-02 |
| ABCD4   | -0.1696 | 1.04E-03 | 4.44E-03 |
| ABCE1   | -0.1060 | 4.12E-02 | 9.23E-02 |
| ABCF1   | 0.2019  | 8.99E-05 | 5.58E-04 |
| ABCF2   | 0.0583  | 2.62E-01 | 3.89E-01 |
| ABCF3   | 0.0223  | 6.69E-01 | 7.69E-01 |
| ABCG1   | 0.0331  | 5.24E-01 | 6.48E-01 |
| ABCG2   | -0.2375 | 3.75E-06 | 3.62E-05 |
| ABCG4   | -0.0964 | 6.37E-02 | 1.30E-01 |
| ABCG5   | -0.0727 | 1.62E-01 | 2.69E-01 |
| ABCG8   | -0.1036 | 4.62E-02 | 1.01E-01 |
| ABHD10  | -0.2392 | 3.17E-06 | 3.12E-05 |
| ABHD11  | 0.0659  | 2.05E-01 | 3.23E-01 |
| ABHD12B | 0.0132  | 8.00E-01 | 8.67E-01 |
| ABHD12  | 0.0082  | 8.74E-01 | 9.19E-01 |
| ABHD13  | 0.0159  | 7.61E-01 | 8.39E-01 |
| ABHD14A | -0.0834 | 1.09E-01 | 1.99E-01 |

|         |         |          |          |
|---------|---------|----------|----------|
| ABHD14B | -0.3268 | 1.11E-10 | 3.22E-09 |
| ABHD15  | -0.1029 | 4.77E-02 | 1.04E-01 |
| ABHD1   | -0.1437 | 5.57E-03 | 1.80E-02 |
| ABHD2   | -0.3138 | 6.37E-10 | 1.57E-08 |
| ABHD3   | 0.1665  | 1.29E-03 | 5.33E-03 |
| ABHD4   | -0.0076 | 8.84E-01 | 9.25E-01 |
| ABHD5   | -0.0544 | 2.96E-01 | 4.26E-01 |
| ABHD6   | -0.3342 | 3.93E-11 | 1.26E-09 |
| ABHD8   | -0.0784 | 1.32E-01 | 2.29E-01 |
| ABI1    | 0.0794  | 1.27E-01 | 2.23E-01 |
| ABI2    | 0.1956  | 1.49E-04 | 8.60E-04 |
| ABI3BP  | -0.1962 | 1.43E-04 | 8.31E-04 |
| ABI3    | -0.0802 | 1.23E-01 | 2.18E-01 |
| ABL1    | 0.1456  | 4.95E-03 | 1.63E-02 |
| ABL2    | 0.3363  | 2.91E-11 | 9.57E-10 |
| ABLIM1  | -0.0914 | 7.87E-02 | 1.54E-01 |
| ABLIM2  | 0.0035  | 9.46E-01 | 9.67E-01 |
| ABLIM3  | -0.2304 | 7.34E-06 | 6.42E-05 |
| ABO     | -0.0807 | 1.21E-01 | 2.15E-01 |
| ABP1    | -0.1396 | 7.08E-03 | 2.20E-02 |
| ABRA    | 0.0075  | 8.85E-01 | 9.26E-01 |
| ABR     | -0.0189 | 7.17E-01 | 8.07E-01 |
| ABT1    | 0.1352  | 9.13E-03 | 2.72E-02 |
| ABTB1   | 0.0452  | 3.86E-01 | 5.19E-01 |
| ABTB2   | -0.1183 | 2.27E-02 | 5.70E-02 |
| ACAA1   | -0.3904 | 5.85E-15 | 3.97E-13 |
| ACAA2   | -0.3872 | 1.03E-14 | 6.65E-13 |
| ACACA   | 0.1262  | 1.50E-02 | 4.07E-02 |
| ACACB   | -0.1840 | 3.67E-04 | 1.85E-03 |
| ACAD10  | -0.3484 | 5.03E-12 | 1.95E-10 |
| ACAD11  | -0.3528 | 2.59E-12 | 1.06E-10 |
| ACAD8   | -0.2376 | 3.69E-06 | 3.57E-05 |
| ACAD9   | -0.1064 | 4.06E-02 | 9.12E-02 |
| ACADL   | -0.1950 | 1.56E-04 | 8.93E-04 |
| ACADM   | -0.2841 | 2.55E-08 | 4.27E-07 |
| ACADSB  | -0.2121 | 3.83E-05 | 2.70E-04 |
| ACADS   | -0.2777 | 5.40E-08 | 8.34E-07 |
| ACADVL  | -0.2440 | 1.98E-06 | 2.08E-05 |
| ACAN    | 0.1207  | 2.00E-02 | 5.14E-02 |
| ACAP1   | -0.0480 | 3.56E-01 | 4.88E-01 |
| ACAP2   | 0.0536  | 3.03E-01 | 4.33E-01 |
| ACAP3   | -0.0042 | 9.35E-01 | 9.60E-01 |
| ACAT1   | -0.3428 | 1.15E-11 | 4.05E-10 |
| ACAT2   | -0.0270 | 6.04E-01 | 7.16E-01 |

|        |         |          |          |
|--------|---------|----------|----------|
| ACBD3  | 0.1521  | 3.31E-03 | 1.17E-02 |
| ACBD4  | -0.2786 | 4.86E-08 | 7.60E-07 |
| ACBD5  | -0.2379 | 3.59E-06 | 3.49E-05 |
| ACBD6  | 0.4344  | 1.66E-18 | 2.75E-16 |
| ACBD7  | 0.1259  | 1.53E-02 | 4.13E-02 |
| ACCN1  | -0.1512 | 3.51E-03 | 1.23E-02 |
| ACCN2  | 0.0949  | 6.79E-02 | 1.37E-01 |
| ACCN3  | 0.1547  | 2.81E-03 | 1.03E-02 |
| ACCN4  | 0.2562  | 5.65E-07 | 6.79E-06 |
| ACCN5  | 0.0516  | 3.22E-01 | 4.52E-01 |
| ACCSL  | -0.0527 | 3.12E-01 | 4.41E-01 |
| ACCS   | -0.0799 | 1.24E-01 | 2.20E-01 |
| ACD    | 0.2207  | 1.79E-05 | 1.40E-04 |
| ACE2   | -0.1518 | 3.39E-03 | 1.20E-02 |
| ACER1  | -0.1478 | 4.33E-03 | 1.47E-02 |
| ACER2  | -0.1252 | 1.58E-02 | 4.24E-02 |
| ACER3  | 0.0556  | 2.86E-01 | 4.14E-01 |
| ACE    | -0.0141 | 7.86E-01 | 8.58E-01 |
| ACHE   | -0.0070 | 8.94E-01 | 9.32E-01 |
| ACIN1  | 0.2849  | 2.34E-08 | 3.96E-07 |
| ACLY   | 0.0684  | 1.89E-01 | 3.02E-01 |
| ACMSD  | -0.1791 | 5.29E-04 | 2.49E-03 |
| ACN9   | -0.1049 | 4.34E-02 | 9.63E-02 |
| ACO1   | -0.2013 | 9.46E-05 | 5.81E-04 |
| ACO2   | -0.1660 | 1.34E-03 | 5.49E-03 |
| ACOT11 | 0.1627  | 1.67E-03 | 6.62E-03 |
| ACOT12 | -0.3069 | 1.55E-09 | 3.54E-08 |
| ACOT13 | -0.2130 | 3.54E-05 | 2.53E-04 |
| ACOT1  | -0.3059 | 1.79E-09 | 4.02E-08 |
| ACOT2  | -0.3293 | 7.84E-11 | 2.35E-09 |
| ACOT4  | -0.1579 | 2.29E-03 | 8.61E-03 |
| ACOT6  | -0.1952 | 1.55E-04 | 8.86E-04 |
| ACOT7  | 0.1171  | 2.41E-02 | 5.97E-02 |
| ACOT8  | -0.0271 | 6.03E-01 | 7.15E-01 |
| ACOT9  | 0.0159  | 7.60E-01 | 8.39E-01 |
| ACOX1  | -0.2756 | 6.83E-08 | 1.03E-06 |
| ACOX2  | -0.1809 | 4.62E-04 | 2.23E-03 |
| ACOX3  | -0.1257 | 1.54E-02 | 4.15E-02 |
| ACOXL  | 0.1696  | 1.04E-03 | 4.44E-03 |
| ACP1   | 0.0341  | 5.13E-01 | 6.37E-01 |
| ACP2   | -0.1062 | 4.08E-02 | 9.17E-02 |
| ACP5   | -0.0229 | 6.60E-01 | 7.61E-01 |
| ACP6   | 0.3106  | 9.70E-10 | 2.30E-08 |
| ACPL2  | 0.1421  | 6.10E-03 | 1.94E-02 |

|        |         |          |          |
|--------|---------|----------|----------|
| ACPP   | 0.0169  | 7.46E-01 | 8.29E-01 |
| ACPT   | 0.1910  | 2.15E-04 | 1.17E-03 |
| ACRBP  | 0.0543  | 2.97E-01 | 4.26E-01 |
| ACRC   | 0.0939  | 7.10E-02 | 1.42E-01 |
| ACRV1  | 0.3177  | 3.83E-10 | 1.00E-08 |
| ACR    | -0.1441 | 5.44E-03 | 1.77E-02 |
| ACSBG1 | -0.1060 | 4.14E-02 | 9.26E-02 |
| ACSBG2 | 0.1282  | 1.34E-02 | 3.73E-02 |
| ACSF2  | -0.1341 | 9.74E-03 | 2.86E-02 |
| ACSF3  | -0.2665 | 1.88E-07 | 2.57E-06 |
| ACSL1  | -0.2719 | 1.04E-07 | 1.50E-06 |
| ACSL3  | 0.0259  | 6.18E-01 | 7.28E-01 |
| ACSL4  | 0.0994  | 5.58E-02 | 1.17E-01 |
| ACSL5  | -0.1638 | 1.55E-03 | 6.22E-03 |
| ACSL6  | -0.1444 | 5.33E-03 | 1.74E-02 |
| ACSM1  | 0.0162  | 7.56E-01 | 8.36E-01 |
| ACSM2A | -0.2305 | 7.28E-06 | 6.38E-05 |
| ACSM2B | -0.1759 | 6.67E-04 | 3.04E-03 |
| ACSM3  | -0.2518 | 9.00E-07 | 1.03E-05 |
| ACSM4  | 0.0356  | 4.94E-01 | 6.21E-01 |
| ACSM5  | -0.2545 | 6.78E-07 | 8.04E-06 |
| ACSS1  | 0.0995  | 5.55E-02 | 1.17E-01 |
| ACSS2  | -0.2130 | 3.53E-05 | 2.52E-04 |
| ACSS3  | -0.2916 | 1.05E-08 | 1.95E-07 |
| ACTA1  | 0.1983  | 1.20E-04 | 7.15E-04 |
| ACTA2  | -0.1501 | 3.76E-03 | 1.31E-02 |
| ACTBL2 | 0.0698  | 1.80E-01 | 2.92E-01 |
| ACTB   | -0.0250 | 6.31E-01 | 7.38E-01 |
| ACTC1  | -0.1218 | 1.89E-02 | 4.91E-02 |
| ACTG1  | 0.1284  | 1.33E-02 | 3.71E-02 |
| ACTG2  | -0.0236 | 6.51E-01 | 7.54E-01 |
| ACTL6A | 0.3711  | 1.48E-13 | 7.71E-12 |
| ACTL6B | 0.0264  | 6.13E-01 | 7.23E-01 |
| ACTL7A | 0.0643  | 2.17E-01 | 3.37E-01 |
| ACTL7B | 0.0888  | 8.76E-02 | 1.67E-01 |
| ACTL8  | 0.0228  | 6.62E-01 | 7.63E-01 |
| ACTL9  | -0.0996 | 5.53E-02 | 1.16E-01 |
| ACTN1  | -0.1265 | 1.48E-02 | 4.02E-02 |
| ACTN2  | 0.1291  | 1.28E-02 | 3.58E-02 |
| ACTN3  | 0.0767  | 1.40E-01 | 2.41E-01 |
| ACTN4  | 0.0856  | 9.98E-02 | 1.86E-01 |
| ACTR10 | 0.0659  | 2.06E-01 | 3.23E-01 |
| ACTR1A | -0.1946 | 1.62E-04 | 9.19E-04 |
| ACTR1B | -0.1297 | 1.24E-02 | 3.49E-02 |

|          |         |          |          |
|----------|---------|----------|----------|
| ACTR2    | -0.0337 | 5.17E-01 | 6.42E-01 |
| ACTR3B   | -0.0874 | 9.29E-02 | 1.75E-01 |
| ACTR3C   | -0.2186 | 2.16E-05 | 1.65E-04 |
| ACTR3    | 0.1038  | 4.57E-02 | 1.00E-01 |
| ACTR5    | 0.2309  | 7.00E-06 | 6.18E-05 |
| ACTR6    | 0.1292  | 1.27E-02 | 3.56E-02 |
| ACTR8    | 0.0274  | 5.99E-01 | 7.12E-01 |
| ACTRT1   | 0.1489  | 4.05E-03 | 1.39E-02 |
| ACVR1B   | -0.0166 | 7.50E-01 | 8.32E-01 |
| ACVR1C   | -0.1653 | 1.40E-03 | 5.71E-03 |
| ACVR1    | 0.0582  | 2.64E-01 | 3.91E-01 |
| ACVR2A   | 0.0297  | 5.69E-01 | 6.86E-01 |
| ACVR2B   | 0.2353  | 4.60E-06 | 4.33E-05 |
| ACVRL1   | -0.0841 | 1.06E-01 | 1.94E-01 |
| ACY1     | -0.4076 | 2.80E-16 | 2.54E-14 |
| ACY3     | -0.1958 | 1.47E-04 | 8.51E-04 |
| ACYP1    | 0.3067  | 1.60E-09 | 3.63E-08 |
| ACYP2    | -0.3425 | 1.19E-11 | 4.17E-10 |
| ADAD1    | 0.0513  | 3.24E-01 | 4.54E-01 |
| ADAD2    | -0.0036 | 9.46E-01 | 9.66E-01 |
| ADAL     | -0.1837 | 3.76E-04 | 1.88E-03 |
| ADAM10   | -0.0027 | 9.59E-01 | 9.74E-01 |
| ADAM11   | 0.1988  | 1.16E-04 | 6.92E-04 |
| ADAM12   | 0.0516  | 3.21E-01 | 4.52E-01 |
| ADAM15   | 0.2400  | 2.93E-06 | 2.90E-05 |
| ADAM17   | 0.0852  | 1.02E-01 | 1.88E-01 |
| ADAM18   | 0.1031  | 4.71E-02 | 1.03E-01 |
| ADAM19   | 0.0122  | 8.15E-01 | 8.79E-01 |
| ADAM20   | 0.0161  | 7.58E-01 | 8.37E-01 |
| ADAM21P1 | -0.0859 | 9.85E-02 | 1.84E-01 |
| ADAM21   | -0.0411 | 4.30E-01 | 5.62E-01 |
| ADAM22   | 0.1108  | 3.29E-02 | 7.70E-02 |
| ADAM23   | 0.1262  | 1.50E-02 | 4.07E-02 |
| ADAM28   | 0.0325  | 5.33E-01 | 6.55E-01 |
| ADAM29   | 0.0020  | 9.70E-01 | 9.81E-01 |
| ADAM2    | 0.0471  | 3.66E-01 | 4.98E-01 |
| ADAM30   | 0.0205  | 6.94E-01 | 7.89E-01 |
| ADAM32   | 0.1119  | 3.12E-02 | 7.37E-02 |
| ADAM33   | -0.0918 | 7.74E-02 | 1.52E-01 |
| ADAM3A   | 0.0900  | 8.35E-02 | 1.61E-01 |
| ADAM5P   | 0.0955  | 6.62E-02 | 1.34E-01 |
| ADAM6    | -0.0559 | 2.83E-01 | 4.11E-01 |
| ADAM7    | 0.0795  | 1.26E-01 | 2.22E-01 |
| ADAM8    | 0.0977  | 6.00E-02 | 1.24E-01 |

|          |         |          |          |
|----------|---------|----------|----------|
| ADAM9    | 0.0693  | 1.83E-01 | 2.95E-01 |
| ADAMDEC1 | 0.0219  | 6.75E-01 | 7.74E-01 |
| ADAMTS10 | 0.1007  | 5.26E-02 | 1.12E-01 |
| ADAMTS12 | -0.1195 | 2.13E-02 | 5.40E-02 |
| ADAMTS13 | -0.0133 | 7.99E-01 | 8.67E-01 |
| ADAMTS14 | 0.1070  | 3.94E-02 | 8.91E-02 |
| ADAMTS15 | -0.2002 | 1.03E-04 | 6.23E-04 |
| ADAMTS16 | -0.0070 | 8.93E-01 | 9.32E-01 |
| ADAMTS17 | -0.0992 | 5.62E-02 | 1.18E-01 |
| ADAMTS18 | -0.1066 | 4.02E-02 | 9.06E-02 |
| ADAMTS19 | 0.1022  | 4.92E-02 | 1.06E-01 |
| ADAMTS1  | -0.2421 | 2.37E-06 | 2.42E-05 |
| ADAMTS20 | 0.1291  | 1.28E-02 | 3.58E-02 |
| ADAMTS2  | -0.1469 | 4.58E-03 | 1.53E-02 |
| ADAMTS3  | -0.0442 | 3.96E-01 | 5.28E-01 |
| ADAMTS4  | -0.2059 | 6.46E-05 | 4.20E-04 |
| ADAMTS5  | 0.0444  | 3.94E-01 | 5.27E-01 |
| ADAMTS6  | 0.1248  | 1.61E-02 | 4.32E-02 |
| ADAMTS7  | -0.0257 | 6.21E-01 | 7.30E-01 |
| ADAMTS8  | -0.0612 | 2.40E-01 | 3.64E-01 |
| ADAMTS9  | 0.0065  | 9.00E-01 | 9.37E-01 |
| ADAMTSL1 | -0.1784 | 5.56E-04 | 2.60E-03 |
| ADAMTSL2 | -0.1242 | 1.67E-02 | 4.44E-02 |
| ADAMTSL3 | -0.1664 | 1.30E-03 | 5.36E-03 |
| ADAMTSL4 | -0.0156 | 7.64E-01 | 8.41E-01 |
| ADAMTSL5 | -0.0618 | 2.35E-01 | 3.59E-01 |
| ADAP1    | 0.1025  | 4.86E-02 | 1.05E-01 |
| ADAP2    | 0.0055  | 9.15E-01 | 9.47E-01 |
| ADARB1   | -0.1416 | 6.30E-03 | 1.99E-02 |
| ADARB2   | 0.0846  | 1.04E-01 | 1.91E-01 |
| ADAR     | 0.4284  | 5.39E-18 | 7.62E-16 |
| ADAT1    | -0.1478 | 4.33E-03 | 1.47E-02 |
| ADAT2    | 0.3029  | 2.59E-09 | 5.54E-08 |
| ADAT3    | -0.0005 | 9.93E-01 | 9.96E-01 |
| ADA      | 0.1338  | 9.89E-03 | 2.90E-02 |
| ADCK1    | -0.1372 | 8.12E-03 | 2.46E-02 |
| ADCK2    | -0.0169 | 7.46E-01 | 8.28E-01 |
| ADCK4    | -0.0698 | 1.80E-01 | 2.91E-01 |
| ADCK5    | 0.0574  | 2.70E-01 | 3.98E-01 |
| ADCY10   | 0.1222  | 1.85E-02 | 4.83E-02 |
| ADCY1    | -0.0417 | 4.24E-01 | 5.56E-01 |
| ADCY2    | -0.0507 | 3.30E-01 | 4.61E-01 |
| ADCY3    | 0.0076  | 8.84E-01 | 9.26E-01 |
| ADCY4    | -0.1778 | 5.80E-04 | 2.69E-03 |

|           |         |          |          |
|-----------|---------|----------|----------|
| ADCY5     | -0.0439 | 3.99E-01 | 5.32E-01 |
| ADCY6     | 0.2271  | 9.96E-06 | 8.38E-05 |
| ADCY7     | -0.0102 | 8.44E-01 | 8.98E-01 |
| ADCY8     | -0.0212 | 6.85E-01 | 7.81E-01 |
| ADCY9     | -0.1347 | 9.36E-03 | 2.78E-02 |
| ADCYAP1R1 | -0.0829 | 1.11E-01 | 2.01E-01 |
| ADCYAP1   | -0.2250 | 1.21E-05 | 9.91E-05 |
| ADC       | -0.0376 | 4.71E-01 | 6.00E-01 |
| ADD1      | -0.0382 | 4.63E-01 | 5.93E-01 |
| ADD2      | -0.0181 | 7.28E-01 | 8.15E-01 |
| ADD3      | 0.0829  | 1.11E-01 | 2.02E-01 |
| ADH1A     | -0.2313 | 6.78E-06 | 6.01E-05 |
| ADH1B     | -0.2847 | 2.40E-08 | 4.05E-07 |
| ADH1C     | -0.1398 | 6.99E-03 | 2.17E-02 |
| ADH4      | -0.2840 | 2.58E-08 | 4.31E-07 |
| ADH5      | -0.1444 | 5.33E-03 | 1.74E-02 |
| ADH6      | -0.1801 | 4.90E-04 | 2.34E-03 |
| ADH7      | -0.0344 | 5.08E-01 | 6.33E-01 |
| ADHFE1    | -0.2844 | 2.47E-08 | 4.15E-07 |
| ADI1      | -0.3093 | 1.15E-09 | 2.68E-08 |
| ADIG      | -0.0954 | 6.64E-02 | 1.34E-01 |
| ADIPOQ    | -0.0976 | 6.03E-02 | 1.25E-01 |
| ADIPOR1   | 0.1419  | 6.17E-03 | 1.96E-02 |
| ADIPOR2   | -0.1931 | 1.82E-04 | 1.02E-03 |
| ADK       | -0.2869 | 1.85E-08 | 3.24E-07 |
| ADM2      | 0.2435  | 2.08E-06 | 2.16E-05 |
| ADM       | -0.1449 | 5.16E-03 | 1.69E-02 |
| ADNP2     | 0.1546  | 2.83E-03 | 1.03E-02 |
| ADNP      | 0.1469  | 4.58E-03 | 1.54E-02 |
| ADORA1    | 0.1331  | 1.03E-02 | 2.99E-02 |
| ADORA2A   | 0.1103  | 3.37E-02 | 7.87E-02 |
| ADORA2B   | 0.2128  | 3.60E-05 | 2.56E-04 |
| ADORA3    | 0.0067  | 8.98E-01 | 9.36E-01 |
| ADO       | 0.2160  | 2.71E-05 | 2.01E-04 |
| ADPGK     | 0.1498  | 3.82E-03 | 1.32E-02 |
| ADPRHL1   | 0.2344  | 5.03E-06 | 4.66E-05 |
| ADPRHL2   | 0.0595  | 2.53E-01 | 3.78E-01 |
| ADPRH     | 0.0110  | 8.32E-01 | 8.90E-01 |
| ADRA1A    | -0.2471 | 1.45E-06 | 1.57E-05 |
| ADRA1B    | -0.2364 | 4.15E-06 | 3.95E-05 |
| ADRA1D    | 0.0028  | 9.57E-01 | 9.73E-01 |
| ADRA2A    | -0.0922 | 7.62E-02 | 1.50E-01 |
| ADRA2B    | -0.1268 | 1.45E-02 | 3.96E-02 |
| ADRA2C    | 0.0394  | 4.49E-01 | 5.80E-01 |



|         |         |          |          |
|---------|---------|----------|----------|
| ADRB1   | -0.1746 | 7.31E-04 | 3.29E-03 |
| ADRB2   | -0.1824 | 4.13E-04 | 2.03E-03 |
| ADRB3   | 0.0667  | 2.00E-01 | 3.17E-01 |
| ADRBK1  | 0.0294  | 5.73E-01 | 6.90E-01 |
| ADRBK2  | -0.0657 | 2.06E-01 | 3.24E-01 |
| ADRM1   | 0.0527  | 3.11E-01 | 4.41E-01 |
| ADSL    | 0.2157  | 2.79E-05 | 2.06E-04 |
| ADSSL1  | -0.1461 | 4.81E-03 | 1.60E-02 |
| ADSS    | 0.2419  | 2.44E-06 | 2.48E-05 |
| AEBP1   | -0.1266 | 1.47E-02 | 4.00E-02 |
| AEBP2   | 0.1330  | 1.04E-02 | 3.01E-02 |
| AEN     | -0.1227 | 1.80E-02 | 4.72E-02 |
| AES     | -0.0720 | 1.66E-01 | 2.74E-01 |
| AFAP1L1 | -0.0975 | 6.07E-02 | 1.25E-01 |
| AFAP1L2 | -0.0375 | 4.72E-01 | 6.01E-01 |
| AFAP1   | 0.0059  | 9.10E-01 | 9.43E-01 |
| AFARP1  | -0.1720 | 8.82E-04 | 3.86E-03 |
| AFF1    | -0.1197 | 2.12E-02 | 5.37E-02 |
| AFF2    | 0.0815  | 1.17E-01 | 2.10E-01 |
| AFF3    | 0.0426  | 4.13E-01 | 5.46E-01 |
| AFF4    | -0.2375 | 3.73E-06 | 3.61E-05 |
| AFG3L1  | 0.1401  | 6.87E-03 | 2.14E-02 |
| AFG3L2  | -0.1742 | 7.52E-04 | 3.37E-03 |
| AFMID   | -0.0980 | 5.93E-02 | 1.23E-01 |
| AFM     | -0.1739 | 7.70E-04 | 3.44E-03 |
| AFP     | 0.1871  | 2.90E-04 | 1.52E-03 |
| AFTPH   | 0.0711  | 1.72E-01 | 2.81E-01 |
| AG2     | -0.2183 | 2.22E-05 | 1.69E-04 |
| AGAP11  | 0.0167  | 7.48E-01 | 8.30E-01 |
| AGAP1   | 0.1295  | 1.25E-02 | 3.51E-02 |
| AGAP2   | -0.0750 | 1.49E-01 | 2.53E-01 |
| AGAP3   | -0.0807 | 1.21E-01 | 2.15E-01 |
| AGAP4   | 0.2844  | 2.47E-08 | 4.15E-07 |
| AGAP5   | 0.2358  | 4.40E-06 | 4.17E-05 |
| AGAP6   | 0.2509  | 9.81E-07 | 1.11E-05 |
| AGAP7   | 0.1909  | 2.16E-04 | 1.18E-03 |
| AGAP8   | 0.2304  | 7.35E-06 | 6.43E-05 |
| AGA     | -0.0592 | 2.56E-01 | 3.82E-01 |
| AGBL1   | 0.0621  | 2.33E-01 | 3.56E-01 |
| AGBL2   | 0.0265  | 6.10E-01 | 7.22E-01 |
| AGBL3   | 0.0957  | 6.56E-02 | 1.33E-01 |
| AGBL4   | -0.0538 | 3.01E-01 | 4.30E-01 |
| AGBL5   | 0.1615  | 1.80E-03 | 7.07E-03 |
| AGER    | 0.1839  | 3.71E-04 | 1.86E-03 |

|         |         |          |          |
|---------|---------|----------|----------|
| AGFG1   | 0.1065  | 4.04E-02 | 9.09E-02 |
| AGFG2   | -0.1421 | 6.12E-03 | 1.95E-02 |
| AGGF1   | 0.0205  | 6.94E-01 | 7.89E-01 |
| AGK     | -0.0419 | 4.21E-01 | 5.54E-01 |
| AGL     | -0.3117 | 8.46E-10 | 2.04E-08 |
| AGMAT   | -0.1025 | 4.85E-02 | 1.05E-01 |
| AGPAT1  | 0.0958  | 6.54E-02 | 1.33E-01 |
| AGPAT2  | -0.0340 | 5.14E-01 | 6.38E-01 |
| AGPAT3  | -0.0668 | 1.99E-01 | 3.16E-01 |
| AGPAT4  | 0.1274  | 1.41E-02 | 3.87E-02 |
| AGPAT5  | 0.0941  | 7.02E-02 | 1.41E-01 |
| AGPAT6  | -0.0644 | 2.16E-01 | 3.36E-01 |
| AGPAT9  | -0.0594 | 2.53E-01 | 3.79E-01 |
| AGPHD1  | -0.0580 | 2.65E-01 | 3.93E-01 |
| AGPS    | 0.0327  | 5.30E-01 | 6.53E-01 |
| AGR2    | 0.0851  | 1.02E-01 | 1.88E-01 |
| AGR3    | 0.0253  | 6.28E-01 | 7.36E-01 |
| AGRN    | 0.0163  | 7.54E-01 | 8.35E-01 |
| AGRP    | 0.1929  | 1.85E-04 | 1.03E-03 |
| AGTPBP1 | 0.1134  | 2.90E-02 | 6.96E-02 |
| AGTR1   | -0.1119 | 3.11E-02 | 7.36E-02 |
| AGTR2   | -0.0581 | 2.64E-01 | 3.91E-01 |
| AGTRAP  | 0.1214  | 1.93E-02 | 4.99E-02 |
| AGT     | -0.0535 | 3.04E-01 | 4.34E-01 |
| AGXT2L1 | -0.2571 | 5.18E-07 | 6.30E-06 |
| AGXT2L2 | -0.2720 | 1.03E-07 | 1.49E-06 |
| AGXT2   | -0.2167 | 2.56E-05 | 1.92E-04 |
| AGXT    | -0.1525 | 3.23E-03 | 1.15E-02 |
| AHCTF1  | 0.2429  | 2.21E-06 | 2.27E-05 |
| AHCYL1  | -0.1590 | 2.12E-03 | 8.09E-03 |
| AHCYL2  | -0.1666 | 1.28E-03 | 5.30E-03 |
| AHCY    | -0.1101 | 3.40E-02 | 7.92E-02 |
| AHDC1   | -0.0002 | 9.97E-01 | 9.98E-01 |
| AHI1    | 0.2125  | 3.68E-05 | 2.61E-04 |
| AHNAK2  | -0.0021 | 9.68E-01 | 9.80E-01 |
| AHNAK   | -0.0745 | 1.52E-01 | 2.57E-01 |
| AHRR    | 0.0448  | 3.89E-01 | 5.22E-01 |
| AHR     | -0.2049 | 7.05E-05 | 4.53E-04 |
| AHSA1   | 0.0451  | 3.87E-01 | 5.20E-01 |
| AHSA2   | 0.2244  | 1.28E-05 | 1.04E-04 |
| AHSG    | -0.1163 | 2.51E-02 | 6.17E-02 |
| AHSP    | -0.1384 | 7.61E-03 | 2.33E-02 |
| AICDA   | 0.0131  | 8.01E-01 | 8.69E-01 |
| AIDA    | 0.2151  | 2.93E-05 | 2.15E-04 |

|         |         |          |          |
|---------|---------|----------|----------|
| AIF1L   | -0.0240 | 6.45E-01 | 7.50E-01 |
| AIF1    | -0.0513 | 3.24E-01 | 4.55E-01 |
| AIFM1   | -0.1898 | 2.36E-04 | 1.27E-03 |
| AIFM2   | 0.0581  | 2.64E-01 | 3.91E-01 |
| AIFM3   | 0.1092  | 3.55E-02 | 8.19E-02 |
| AIG1    | -0.1163 | 2.51E-02 | 6.17E-02 |
| AIM1L   | 0.0425  | 4.15E-01 | 5.47E-01 |
| AIM1    | -0.1366 | 8.45E-03 | 2.55E-02 |
| AIM2    | 0.0749  | 1.50E-01 | 2.53E-01 |
| AIMP1   | 0.0012  | 9.81E-01 | 9.88E-01 |
| AIMP2   | -0.1662 | 1.31E-03 | 5.40E-03 |
| AIPL1   | 0.0951  | 6.72E-02 | 1.36E-01 |
| AIP     | -0.1075 | 3.85E-02 | 8.75E-02 |
| AIRE    | 0.0678  | 1.93E-01 | 3.08E-01 |
| AJAP1   | -0.0729 | 1.61E-01 | 2.68E-01 |
| AK1     | -0.0339 | 5.15E-01 | 6.39E-01 |
| AK2     | -0.1224 | 1.84E-02 | 4.79E-02 |
| AK3L1   | -0.0199 | 7.02E-01 | 7.95E-01 |
| AK3     | -0.2357 | 4.46E-06 | 4.22E-05 |
| AK5     | -0.0202 | 6.99E-01 | 7.92E-01 |
| AK7     | -0.0052 | 9.21E-01 | 9.50E-01 |
| AKAP10  | 0.0378  | 4.68E-01 | 5.98E-01 |
| AKAP11  | -0.0826 | 1.12E-01 | 2.04E-01 |
| AKAP12  | -0.0740 | 1.55E-01 | 2.60E-01 |
| AKAP13  | -0.1402 | 6.85E-03 | 2.14E-02 |
| AKAP14  | -0.0293 | 5.74E-01 | 6.91E-01 |
| AKAP1   | 0.0880  | 9.06E-02 | 1.72E-01 |
| AKAP2   | -0.1182 | 2.28E-02 | 5.71E-02 |
| AKAP3   | -0.1890 | 2.51E-04 | 1.34E-03 |
| AKAP4   | 0.0263  | 6.13E-01 | 7.24E-01 |
| AKAP5   | 0.0961  | 6.45E-02 | 1.31E-01 |
| AKAP6   | -0.2030 | 8.19E-05 | 5.15E-04 |
| AKAP7   | 0.0235  | 6.51E-01 | 7.55E-01 |
| AKAP8L  | 0.2142  | 3.17E-05 | 2.29E-04 |
| AKAP8   | 0.1919  | 2.00E-04 | 1.10E-03 |
| AKAP9   | -0.0867 | 9.54E-02 | 1.79E-01 |
| AKD1    | 0.1286  | 1.32E-02 | 3.67E-02 |
| AKIRIN1 | -0.0348 | 5.04E-01 | 6.29E-01 |
| AKIRIN2 | 0.0930  | 7.35E-02 | 1.46E-01 |
| AKNAD1  | 0.0731  | 1.60E-01 | 2.66E-01 |
| AKNA    | -0.0008 | 9.88E-01 | 9.93E-01 |
| AKR1A1  | -0.1211 | 1.96E-02 | 5.06E-02 |
| AKR1B10 | 0.0661  | 2.04E-01 | 3.21E-01 |
| AKR1B15 | 0.0364  | 4.85E-01 | 6.13E-01 |

|          |         |          |          |
|----------|---------|----------|----------|
| AKR1B1   | 0.0219  | 6.75E-01 | 7.74E-01 |
| AKR1C1   | -0.1186 | 2.23E-02 | 5.62E-02 |
| AKR1C2   | -0.0912 | 7.93E-02 | 1.55E-01 |
| AKR1C3   | 0.0766  | 1.41E-01 | 2.42E-01 |
| AKR1C4   | -0.1788 | 5.42E-04 | 2.54E-03 |
| AKR1CL1  | -0.0377 | 4.69E-01 | 5.99E-01 |
| AKR1D1   | -0.1616 | 1.79E-03 | 7.03E-03 |
| AKR1E2   | 0.0598  | 2.51E-01 | 3.76E-01 |
| AKR7A2   | -0.1862 | 3.12E-04 | 1.61E-03 |
| AKR7A3   | -0.3033 | 2.46E-09 | 5.29E-08 |
| AKR7L    | -0.2505 | 1.03E-06 | 1.16E-05 |
| AKT1S1   | 0.0061  | 9.06E-01 | 9.41E-01 |
| AKT1     | -0.1326 | 1.06E-02 | 3.06E-02 |
| AKT2     | -0.1852 | 3.35E-04 | 1.71E-03 |
| AKT3     | -0.0064 | 9.03E-01 | 9.39E-01 |
| AKTIP    | -0.2862 | 2.01E-08 | 3.47E-07 |
| ALAD     | -0.1897 | 2.38E-04 | 1.28E-03 |
| ALAS1    | -0.1857 | 3.23E-04 | 1.66E-03 |
| ALAS2    | -0.1185 | 2.24E-02 | 5.63E-02 |
| ALB      | -0.1310 | 1.15E-02 | 3.28E-02 |
| ALCAM    | -0.0510 | 3.27E-01 | 4.58E-01 |
| ALDH16A1 | 0.0011  | 9.83E-01 | 9.89E-01 |
| ALDH18A1 | 0.0300  | 5.64E-01 | 6.82E-01 |
| ALDH1A1  | -0.1021 | 4.93E-02 | 1.06E-01 |
| ALDH1A2  | -0.0331 | 5.25E-01 | 6.48E-01 |
| ALDH1A3  | -0.1398 | 7.00E-03 | 2.17E-02 |
| ALDH1B1  | -0.1941 | 1.68E-04 | 9.50E-04 |
| ALDH1L1  | -0.2207 | 1.79E-05 | 1.40E-04 |
| ALDH1L2  | -0.1191 | 2.17E-02 | 5.50E-02 |
| ALDH2    | -0.3496 | 4.16E-12 | 1.64E-10 |
| ALDH3A1  | -0.0156 | 7.65E-01 | 8.41E-01 |
| ALDH3A2  | -0.1374 | 8.05E-03 | 2.45E-02 |
| ALDH3B1  | 0.1443  | 5.35E-03 | 1.75E-02 |
| ALDH3B2  | 0.1200  | 2.08E-02 | 5.29E-02 |
| ALDH4A1  | -0.3890 | 7.48E-15 | 4.95E-13 |
| ALDH5A1  | -0.2469 | 1.47E-06 | 1.59E-05 |
| ALDH6A1  | -0.3166 | 4.43E-10 | 1.14E-08 |
| ALDH7A1  | -0.2456 | 1.69E-06 | 1.80E-05 |
| ALDH8A1  | -0.1803 | 4.83E-04 | 2.31E-03 |
| ALDH9A1  | -0.1085 | 3.67E-02 | 8.43E-02 |
| ALDOA    | 0.1032  | 4.70E-02 | 1.02E-01 |
| ALDOB    | -0.1627 | 1.67E-03 | 6.61E-03 |
| ALDOC    | 0.1104  | 3.36E-02 | 7.84E-02 |
| ALG10B   | -0.0070 | 8.94E-01 | 9.32E-01 |

|          |         |          |          |
|----------|---------|----------|----------|
| ALG10    | 0.0796  | 1.26E-01 | 2.22E-01 |
| ALG11    | 0.0945  | 6.90E-02 | 1.39E-01 |
| ALG12    | 0.0260  | 6.18E-01 | 7.27E-01 |
| ALG13    | 0.0660  | 2.05E-01 | 3.22E-01 |
| ALG14    | 0.0158  | 7.62E-01 | 8.40E-01 |
| ALG1L2   | 0.0072  | 8.90E-01 | 9.30E-01 |
| ALG1L    | 0.1654  | 1.39E-03 | 5.66E-03 |
| ALG1     | -0.1699 | 1.02E-03 | 4.37E-03 |
| ALG2     | 0.0504  | 3.33E-01 | 4.64E-01 |
| ALG3     | 0.0612  | 2.40E-01 | 3.64E-01 |
| ALG5     | -0.1129 | 2.97E-02 | 7.09E-02 |
| ALG6     | 0.2707  | 1.18E-07 | 1.69E-06 |
| ALG8     | -0.0427 | 4.12E-01 | 5.45E-01 |
| ALG9     | -0.0333 | 5.23E-01 | 6.47E-01 |
| ALKBH1   | -0.0052 | 9.20E-01 | 9.49E-01 |
| ALKBH2   | -0.0072 | 8.89E-01 | 9.29E-01 |
| ALKBH3   | -0.1542 | 2.90E-03 | 1.05E-02 |
| ALKBH4   | -0.0617 | 2.36E-01 | 3.59E-01 |
| ALKBH5   | -0.0974 | 6.08E-02 | 1.26E-01 |
| ALKBH6   | 0.1143  | 2.77E-02 | 6.69E-02 |
| ALKBH7   | -0.1740 | 7.65E-04 | 3.42E-03 |
| ALKBH8   | -0.0094 | 8.57E-01 | 9.07E-01 |
| ALK      | -0.0682 | 1.90E-01 | 3.04E-01 |
| ALLC     | -0.0086 | 8.69E-01 | 9.15E-01 |
| ALMS1P   | 0.0548  | 2.92E-01 | 4.21E-01 |
| ALMS1    | 0.3297  | 7.44E-11 | 2.24E-09 |
| ALOX12B  | 0.1134  | 2.89E-02 | 6.94E-02 |
| ALOX12P2 | -0.1129 | 2.97E-02 | 7.08E-02 |
| ALOX12   | 0.0567  | 2.76E-01 | 4.04E-01 |
| ALOX15B  | 0.0290  | 5.78E-01 | 6.94E-01 |
| ALOX15   | 0.0042  | 9.36E-01 | 9.60E-01 |
| ALOX5AP  | -0.0235 | 6.52E-01 | 7.55E-01 |
| ALOX5    | 0.0702  | 1.77E-01 | 2.88E-01 |
| ALOXE3   | 0.0197  | 7.05E-01 | 7.98E-01 |
| ALPI     | 0.1245  | 1.64E-02 | 4.37E-02 |
| ALPK1    | -0.1049 | 4.35E-02 | 9.63E-02 |
| ALPK2    | -0.0704 | 1.76E-01 | 2.86E-01 |
| ALPK3    | 0.0646  | 2.14E-01 | 3.34E-01 |
| ALPL     | -0.1635 | 1.57E-03 | 6.30E-03 |
| ALPPL2   | 0.0534  | 3.05E-01 | 4.34E-01 |
| ALPP     | 0.1474  | 4.43E-03 | 1.49E-02 |
| ALS2CL   | 0.2040  | 7.56E-05 | 4.82E-04 |
| ALS2CR11 | 0.2007  | 9.95E-05 | 6.06E-04 |
| ALS2CR12 | 0.0129  | 8.04E-01 | 8.70E-01 |

|          |         |          |          |
|----------|---------|----------|----------|
| ALS2CR4  | 0.3126  | 7.49E-10 | 1.83E-08 |
| ALS2CR8  | -0.1123 | 3.06E-02 | 7.26E-02 |
| ALS2     | 0.1267  | 1.46E-02 | 3.98E-02 |
| ALX1     | 0.1296  | 1.25E-02 | 3.50E-02 |
| ALX3     | 0.1958  | 1.48E-04 | 8.52E-04 |
| ALX4     | 0.0203  | 6.96E-01 | 7.90E-01 |
| AMAC1L2  | 0.1063  | 4.07E-02 | 9.15E-02 |
| AMAC1L3  | 0.0875  | 9.22E-02 | 1.74E-01 |
| AMAC1    | -0.0167 | 7.49E-01 | 8.31E-01 |
| AMACR    | -0.3006 | 3.48E-09 | 7.25E-08 |
| AMBN     | -0.0576 | 2.68E-01 | 3.96E-01 |
| AMBP     | -0.0682 | 1.90E-01 | 3.04E-01 |
| AMBRA1   | -0.0625 | 2.29E-01 | 3.52E-01 |
| AMD1     | 0.1023  | 4.90E-02 | 1.06E-01 |
| AMDHD1   | -0.1752 | 7.00E-04 | 3.17E-03 |
| AMDHD2   | -0.1442 | 5.40E-03 | 1.76E-02 |
| AMELX    | 0.0240  | 6.46E-01 | 7.50E-01 |
| AMELY    | 0.0451  | 3.87E-01 | 5.20E-01 |
| AMFR     | -0.4681 | 1.35E-21 | 4.07E-19 |
| AMHR2    | -0.0029 | 9.56E-01 | 9.72E-01 |
| AMH      | 0.1785  | 5.53E-04 | 2.59E-03 |
| AMICA1   | 0.0221  | 6.72E-01 | 7.71E-01 |
| AMIGO1   | -0.1041 | 4.51E-02 | 9.92E-02 |
| AMIGO2   | 0.0186  | 7.21E-01 | 8.10E-01 |
| AMIGO3   | 0.3396  | 1.82E-11 | 6.21E-10 |
| AMMECR1L | 0.1096  | 3.48E-02 | 8.06E-02 |
| AMMECR1  | 0.1541  | 2.92E-03 | 1.06E-02 |
| AMN1     | 0.0774  | 1.37E-01 | 2.36E-01 |
| AMN      | -0.1303 | 1.20E-02 | 3.40E-02 |
| AMOTL1   | 0.0819  | 1.15E-01 | 2.08E-01 |
| AMOTL2   | -0.1030 | 4.74E-02 | 1.03E-01 |
| AMOT     | -0.0744 | 1.53E-01 | 2.57E-01 |
| AMPD1    | -0.0537 | 3.03E-01 | 4.32E-01 |
| AMPD2    | -0.0530 | 3.08E-01 | 4.38E-01 |
| AMPD3    | 0.0561  | 2.82E-01 | 4.10E-01 |
| AMPH     | -0.0127 | 8.08E-01 | 8.73E-01 |
| AMTN     | 0.0736  | 1.57E-01 | 2.63E-01 |
| AMT      | -0.0731 | 1.60E-01 | 2.66E-01 |
| AMY1A    | -0.0202 | 6.99E-01 | 7.92E-01 |
| AMY2A    | -0.0906 | 8.15E-02 | 1.58E-01 |
| AMY2B    | -0.0241 | 6.44E-01 | 7.49E-01 |
| AMZ1     | 0.0244  | 6.39E-01 | 7.45E-01 |
| AMZ2P1   | 0.2126  | 3.64E-05 | 2.59E-04 |
| AMZ2     | 0.2344  | 5.03E-06 | 4.66E-05 |

|              |         |          |          |
|--------------|---------|----------|----------|
| ANAPC10      | -0.0223 | 6.69E-01 | 7.69E-01 |
| ANAPC11      | 0.1332  | 1.02E-02 | 2.97E-02 |
| ANAPC13      | -0.0876 | 9.21E-02 | 1.74E-01 |
| ANAPC16      | -0.0554 | 2.87E-01 | 4.16E-01 |
| ANAPC1       | 0.0768  | 1.40E-01 | 2.41E-01 |
| ANAPC2       | 0.1356  | 8.94E-03 | 2.67E-02 |
| ANAPC4       | 0.3573  | 1.29E-12 | 5.64E-11 |
| ANAPC5       | 0.1366  | 8.44E-03 | 2.55E-02 |
| ANAPC7       | 0.3143  | 5.96E-10 | 1.49E-08 |
| ANGEL1       | 0.1478  | 4.32E-03 | 1.47E-02 |
| ANGEL2       | 0.2601  | 3.77E-07 | 4.78E-06 |
| ANGPT1       | -0.0889 | 8.74E-02 | 1.67E-01 |
| ANGPT2       | 0.0380  | 4.66E-01 | 5.96E-01 |
| ANGPT4       | -0.0900 | 8.34E-02 | 1.61E-01 |
| ANGPTL1      | -0.1716 | 9.05E-04 | 3.94E-03 |
| ANGPTL2      | -0.1561 | 2.57E-03 | 9.47E-03 |
| ANGPTL3      | -0.2336 | 5.45E-06 | 4.98E-05 |
| ANGPTL4      | -0.1438 | 5.54E-03 | 1.79E-02 |
| ANGPTL5      | -0.0060 | 9.09E-01 | 9.43E-01 |
| ANGPTL6      | -0.2398 | 2.98E-06 | 2.95E-05 |
| ANGPTL7      | -0.2099 | 4.63E-05 | 3.17E-04 |
| ANG          | -0.2372 | 3.86E-06 | 3.71E-05 |
| ANK1         | 0.0154  | 7.68E-01 | 8.44E-01 |
| ANK2         | 0.0693  | 1.83E-01 | 2.96E-01 |
| ANK3         | 0.0018  | 9.72E-01 | 9.82E-01 |
| ANKAR        | 0.1354  | 9.04E-03 | 2.70E-02 |
| ANKDD1A      | 0.2230  | 1.46E-05 | 1.17E-04 |
| ANKFN1       | -0.0648 | 2.13E-01 | 3.32E-01 |
| ANKFY1       | -0.1507 | 3.61E-03 | 1.26E-02 |
| ANKHD1-EIF4E | -0.1082 | 3.72E-02 | 8.52E-02 |
| ANKHD1       | 0.1385  | 7.54E-03 | 2.31E-02 |
| ANKH         | -0.0684 | 1.89E-01 | 3.02E-01 |
| ANKIB1       | -0.0348 | 5.03E-01 | 6.29E-01 |
| ANKK1        | 0.1624  | 1.70E-03 | 6.72E-03 |
| ANKLE1       | 0.1802  | 4.87E-04 | 2.32E-03 |
| ANKLE2       | 0.2528  | 8.09E-07 | 9.39E-06 |
| ANKMY1       | 0.0791  | 1.29E-01 | 2.25E-01 |
| ANKMY2       | -0.0234 | 6.54E-01 | 7.56E-01 |
| ANKRA2       | -0.0758 | 1.45E-01 | 2.48E-01 |
| ANKRD10      | 0.2612  | 3.33E-07 | 4.29E-06 |
| ANKRD11      | -0.0615 | 2.37E-01 | 3.61E-01 |
| ANKRD12      | -0.0433 | 4.06E-01 | 5.39E-01 |
| ANKRD13A     | 0.1024  | 4.88E-02 | 1.06E-01 |
| ANKRD13B     | 0.1692  | 1.07E-03 | 4.55E-03 |

|            |         |          |          |
|------------|---------|----------|----------|
| ANKRD13C   | 0.1209  | 1.98E-02 | 5.10E-02 |
| ANKRD13D   | 0.2440  | 1.98E-06 | 2.08E-05 |
| ANKRD16    | 0.2007  | 9.89E-05 | 6.03E-04 |
| ANKRD17    | -0.0797 | 1.25E-01 | 2.21E-01 |
| ANKRD19    | 0.1164  | 2.49E-02 | 6.14E-02 |
| ANKRD1     | -0.0398 | 4.45E-01 | 5.77E-01 |
| ANKRD20A3  | 0.0604  | 2.46E-01 | 3.70E-01 |
| ANKRD20A4  | -0.0371 | 4.76E-01 | 6.05E-01 |
| ANKRD20B   | -0.0446 | 3.91E-01 | 5.24E-01 |
| ANKRD22    | 0.0797  | 1.26E-01 | 2.21E-01 |
| ANKRD23    | 0.3180  | 3.65E-10 | 9.65E-09 |
| ANKRD24    | -0.2218 | 1.62E-05 | 1.29E-04 |
| ANKRD26P1  | 0.1157  | 2.58E-02 | 6.33E-02 |
| ANKRD26    | 0.1080  | 3.77E-02 | 8.60E-02 |
| ANKRD27    | 0.1820  | 4.26E-04 | 2.08E-03 |
| ANKRD28    | -0.0692 | 1.83E-01 | 2.96E-01 |
| ANKRD29    | -0.0875 | 9.26E-02 | 1.75E-01 |
| ANKRD2     | 0.1035  | 4.63E-02 | 1.01E-01 |
| ANKRD30A   | 0.1295  | 1.25E-02 | 3.51E-02 |
| ANKRD30B   | -0.0613 | 2.39E-01 | 3.63E-01 |
| ANKRD31    | 0.0594  | 2.54E-01 | 3.79E-01 |
| ANKRD32    | 0.2840  | 2.59E-08 | 4.32E-07 |
| ANKRD33    | 0.0446  | 3.92E-01 | 5.25E-01 |
| ANKRD34A   | 0.0991  | 5.64E-02 | 1.18E-01 |
| ANKRD34B   | 0.1551  | 2.74E-03 | 1.00E-02 |
| ANKRD34C   | -0.0109 | 8.35E-01 | 8.92E-01 |
| ANKRD35    | -0.1085 | 3.67E-02 | 8.42E-02 |
| ANKRD36BP1 | 0.0667  | 2.00E-01 | 3.16E-01 |
| ANKRD36B   | 0.2149  | 2.99E-05 | 2.19E-04 |
| ANKRD36    | 0.2896  | 1.34E-08 | 2.42E-07 |
| ANKRD37    | -0.1776 | 5.88E-04 | 2.72E-03 |
| ANKRD39    | 0.1132  | 2.93E-02 | 7.01E-02 |
| ANKRD40    | 0.1524  | 3.26E-03 | 1.16E-02 |
| ANKRD42    | -0.0762 | 1.43E-01 | 2.45E-01 |
| ANKRD43    | 0.0466  | 3.70E-01 | 5.03E-01 |
| ANKRD44    | -0.0465 | 3.72E-01 | 5.05E-01 |
| ANKRD45    | 0.1031  | 4.72E-02 | 1.03E-01 |
| ANKRD46    | -0.1618 | 1.76E-03 | 6.93E-03 |
| ANKRD49    | 0.2713  | 1.10E-07 | 1.58E-06 |
| ANKRD50    | -0.1770 | 6.17E-04 | 2.84E-03 |
| ANKRD52    | 0.2694  | 1.37E-07 | 1.93E-06 |
| ANKRD53    | 0.0771  | 1.38E-01 | 2.38E-01 |
| ANKRD54    | 0.1821  | 4.22E-04 | 2.07E-03 |
| ANKRD55    | -0.1632 | 1.61E-03 | 6.41E-03 |



|         |         |          |          |
|---------|---------|----------|----------|
| ANKRD56 | -0.1631 | 1.62E-03 | 6.47E-03 |
| ANKRD57 | -0.1390 | 7.33E-03 | 2.26E-02 |
| ANKRD58 | 0.1857  | 3.22E-04 | 1.66E-03 |
| ANKRD5  | 0.0747  | 1.51E-01 | 2.55E-01 |
| ANKRD6  | 0.1374  | 8.05E-03 | 2.45E-02 |
| ANKRD7  | 0.0574  | 2.70E-01 | 3.98E-01 |
| ANKRD9  | -0.0788 | 1.30E-01 | 2.27E-01 |
| ANKS1A  | 0.0755  | 1.47E-01 | 2.49E-01 |
| ANKS1B  | 0.1242  | 1.67E-02 | 4.43E-02 |
| ANKS3   | 0.2810  | 3.68E-08 | 5.92E-07 |
| ANKS4B  | -0.1098 | 3.45E-02 | 8.01E-02 |
| ANKS6   | 0.2736  | 8.60E-08 | 1.27E-06 |
| ANKZF1  | 0.3517  | 3.06E-12 | 1.23E-10 |
| ANLN    | 0.3946  | 2.85E-15 | 2.08E-13 |
| ANO10   | 0.0488  | 3.48E-01 | 4.80E-01 |
| ANO1    | -0.1776 | 5.88E-04 | 2.72E-03 |
| ANO2    | 0.0071  | 8.92E-01 | 9.31E-01 |
| ANO3    | -0.1223 | 1.84E-02 | 4.81E-02 |
| ANO4    | 0.0064  | 9.02E-01 | 9.38E-01 |
| ANO5    | 0.0147  | 7.78E-01 | 8.52E-01 |
| ANO6    | -0.1449 | 5.17E-03 | 1.70E-02 |
| ANO7    | 0.0688  | 1.86E-01 | 2.99E-01 |
| ANO8    | 0.0737  | 1.57E-01 | 2.62E-01 |
| ANO9    | 0.2294  | 8.08E-06 | 6.95E-05 |
| ANP32A  | 0.1087  | 3.64E-02 | 8.36E-02 |
| ANP32B  | 0.2728  | 9.37E-08 | 1.37E-06 |
| ANP32C  | 0.1232  | 1.76E-02 | 4.62E-02 |
| ANP32D  | 0.0528  | 3.10E-01 | 4.40E-01 |
| ANP32E  | 0.5728  | 9.90E-34 | 1.31E-30 |
| ANPEP   | -0.0059 | 9.10E-01 | 9.43E-01 |
| ANTXR1  | -0.0998 | 5.48E-02 | 1.16E-01 |
| ANTXR2  | -0.1579 | 2.29E-03 | 8.63E-03 |
| ANTXRL  | 0.0389  | 4.55E-01 | 5.85E-01 |
| ANUBL1  | 0.0368  | 4.80E-01 | 6.09E-01 |
| ANXA10  | -0.3093 | 1.14E-09 | 2.68E-08 |
| ANXA11  | 0.0214  | 6.82E-01 | 7.79E-01 |
| ANXA13  | 0.1013  | 5.11E-02 | 1.09E-01 |
| ANXA1   | -0.1398 | 7.00E-03 | 2.17E-02 |
| ANXA2P1 | 0.1081  | 3.75E-02 | 8.56E-02 |
| ANXA2P2 | 0.0910  | 8.01E-02 | 1.56E-01 |
| ANXA2P3 | 0.1304  | 1.19E-02 | 3.37E-02 |
| ANXA2   | 0.1130  | 2.95E-02 | 7.05E-02 |
| ANXA3   | -0.0208 | 6.90E-01 | 7.86E-01 |
| ANXA4   | 0.1490  | 4.01E-03 | 1.38E-02 |

|         |         |          |          |
|---------|---------|----------|----------|
| ANXA5   | 0.0533  | 3.06E-01 | 4.36E-01 |
| ANXA6   | -0.2481 | 1.31E-06 | 1.44E-05 |
| ANXA7   | -0.1297 | 1.24E-02 | 3.48E-02 |
| ANXA8L1 | 0.1477  | 4.35E-03 | 1.47E-02 |
| ANXA8L2 | 0.0383  | 4.62E-01 | 5.92E-01 |
| ANXA8   | 0.0673  | 1.96E-01 | 3.11E-01 |
| ANXA9   | 0.1426  | 5.93E-03 | 1.90E-02 |
| AOAH    | -0.0838 | 1.07E-01 | 1.96E-01 |
| AOC2    | -0.0185 | 7.22E-01 | 8.12E-01 |
| AOC3    | -0.1966 | 1.38E-04 | 8.03E-04 |
| AOX1    | -0.2074 | 5.69E-05 | 3.79E-04 |
| AOX2P   | -0.0085 | 8.70E-01 | 9.16E-01 |
| AP1AR   | -0.0931 | 7.33E-02 | 1.46E-01 |
| AP1B1   | -0.0823 | 1.13E-01 | 2.05E-01 |
| AP1G1   | -0.2329 | 5.82E-06 | 5.27E-05 |
| AP1G2   | 0.2045  | 7.25E-05 | 4.65E-04 |
| AP1M1   | -0.1284 | 1.33E-02 | 3.71E-02 |
| AP1M2   | 0.1127  | 3.00E-02 | 7.14E-02 |
| AP1S1   | -0.0645 | 2.15E-01 | 3.35E-01 |
| AP1S2   | -0.0467 | 3.70E-01 | 5.03E-01 |
| AP1S3   | 0.1158  | 2.57E-02 | 6.29E-02 |
| AP2A1   | -0.0410 | 4.31E-01 | 5.63E-01 |
| AP2A2   | 0.0253  | 6.27E-01 | 7.35E-01 |
| AP2B1   | 0.0606  | 2.44E-01 | 3.68E-01 |
| AP2M1   | -0.0238 | 6.48E-01 | 7.52E-01 |
| AP2S1   | 0.0098  | 8.50E-01 | 9.03E-01 |
| AP3B1   | 0.1103  | 3.37E-02 | 7.86E-02 |
| AP3B2   | 0.1548  | 2.80E-03 | 1.02E-02 |
| AP3D1   | 0.0289  | 5.79E-01 | 6.96E-01 |
| AP3M1   | 0.1024  | 4.88E-02 | 1.06E-01 |
| AP3M2   | 0.2211  | 1.72E-05 | 1.36E-04 |
| AP3S1   | -0.1209 | 1.98E-02 | 5.09E-02 |
| AP3S2   | -0.3271 | 1.06E-10 | 3.09E-09 |
| AP4B1   | 0.1496  | 3.87E-03 | 1.34E-02 |
| AP4E1   | 0.0284  | 5.85E-01 | 7.01E-01 |
| AP4M1   | 0.1638  | 1.54E-03 | 6.20E-03 |
| AP4S1   | -0.0792 | 1.28E-01 | 2.24E-01 |
| APAF1   | 0.1667  | 1.27E-03 | 5.28E-03 |
| APBA1   | -0.1276 | 1.39E-02 | 3.83E-02 |
| APBA2   | 0.0179  | 7.31E-01 | 8.18E-01 |
| APBA3   | -0.0622 | 2.32E-01 | 3.55E-01 |
| APBB1IP | -0.0327 | 5.30E-01 | 6.53E-01 |
| APBB1   | 0.0993  | 5.61E-02 | 1.18E-01 |
| APBB2   | -0.1562 | 2.55E-03 | 9.42E-03 |

|          |         |          |          |
|----------|---------|----------|----------|
| APBB3    | 0.0653  | 2.10E-01 | 3.28E-01 |
| APC2     | -0.0819 | 1.15E-01 | 2.08E-01 |
| APCDD1L  | 0.0451  | 3.86E-01 | 5.19E-01 |
| APCDD1   | 0.0397  | 4.46E-01 | 5.78E-01 |
| APCS     | -0.0926 | 7.48E-02 | 1.48E-01 |
| APC      | -0.0612 | 2.39E-01 | 3.63E-01 |
| APEH     | -0.2539 | 7.23E-07 | 8.50E-06 |
| APEX1    | 0.1003  | 5.36E-02 | 1.13E-01 |
| APEX2    | 0.1263  | 1.49E-02 | 4.05E-02 |
| APH1A    | 0.4727  | 4.77E-22 | 1.65E-19 |
| APH1B    | 0.0229  | 6.60E-01 | 7.62E-01 |
| API5     | -0.1237 | 1.72E-02 | 4.54E-02 |
| APIP     | 0.0383  | 4.62E-01 | 5.92E-01 |
| APITD1   | 0.0875  | 9.22E-02 | 1.74E-01 |
| APLF     | -0.0216 | 6.78E-01 | 7.76E-01 |
| APLNR    | -0.2049 | 6.99E-05 | 4.50E-04 |
| APLN     | 0.0761  | 1.44E-01 | 2.46E-01 |
| APLP1    | 0.0061  | 9.07E-01 | 9.41E-01 |
| APLP2    | -0.1023 | 4.89E-02 | 1.06E-01 |
| APOA1BP  | 0.2587  | 4.34E-07 | 5.40E-06 |
| APOA1    | -0.1478 | 4.33E-03 | 1.47E-02 |
| APOA2    | -0.0445 | 3.93E-01 | 5.25E-01 |
| APOA4    | -0.0724 | 1.64E-01 | 2.71E-01 |
| APOA5    | -0.1728 | 8.32E-04 | 3.67E-03 |
| APOB48R  | 0.0193  | 7.11E-01 | 8.03E-01 |
| APOBEC1  | -0.0197 | 7.05E-01 | 7.97E-01 |
| APOBEC2  | 0.1259  | 1.52E-02 | 4.11E-02 |
| APOBEC3A | 0.0973  | 6.11E-02 | 1.26E-01 |
| APOBEC3B | 0.1106  | 3.32E-02 | 7.76E-02 |
| APOBEC3C | -0.0555 | 2.86E-01 | 4.15E-01 |
| APOBEC3D | 0.0185  | 7.22E-01 | 8.12E-01 |
| APOBEC3F | 0.0050  | 9.24E-01 | 9.52E-01 |
| APOBEC3G | -0.0257 | 6.22E-01 | 7.31E-01 |
| APOBEC3H | -0.0981 | 5.89E-02 | 1.22E-01 |
| APOBEC4  | 0.1237  | 1.71E-02 | 4.53E-02 |
| APOB     | -0.1449 | 5.17E-03 | 1.70E-02 |
| APOC1P1  | -0.1943 | 1.66E-04 | 9.40E-04 |
| APOC1    | -0.1585 | 2.20E-03 | 8.32E-03 |
| APOC2    | -0.0638 | 2.20E-01 | 3.41E-01 |
| APOC3    | -0.1373 | 8.08E-03 | 2.45E-02 |
| APOC4    | -0.1485 | 4.15E-03 | 1.42E-02 |
| APOD     | -0.0886 | 8.82E-02 | 1.68E-01 |
| APOE     | -0.1456 | 4.96E-03 | 1.64E-02 |
| APOF     | -0.2602 | 3.70E-07 | 4.71E-06 |

|        |         |          |          |
|--------|---------|----------|----------|
| APOH   | -0.0620 | 2.33E-01 | 3.56E-01 |
| APOL1  | -0.1591 | 2.12E-03 | 8.09E-03 |
| APOL2  | -0.0261 | 6.16E-01 | 7.26E-01 |
| APOL3  | -0.0245 | 6.38E-01 | 7.44E-01 |
| APOL4  | 0.0540  | 3.00E-01 | 4.29E-01 |
| APOL5  | -0.0184 | 7.23E-01 | 8.12E-01 |
| APOL6  | -0.2817 | 3.41E-08 | 5.54E-07 |
| APOLD1 | -0.2143 | 3.15E-05 | 2.28E-04 |
| APOM   | -0.0660 | 2.05E-01 | 3.22E-01 |
| APOOL  | -0.0413 | 4.28E-01 | 5.60E-01 |
| APOO   | -0.0110 | 8.33E-01 | 8.90E-01 |
| APPBP2 | 0.1501  | 3.77E-03 | 1.31E-02 |
| APPL1  | 0.0955  | 6.63E-02 | 1.34E-01 |
| APPL2  | 0.1472  | 4.51E-03 | 1.52E-02 |
| APP    | -0.0489 | 3.47E-01 | 4.80E-01 |
| APRT   | -0.2081 | 5.37E-05 | 3.60E-04 |
| APTX   | 0.1839  | 3.69E-04 | 1.85E-03 |
| AQP10  | 0.1492  | 3.97E-03 | 1.37E-02 |
| AQP11  | -0.1030 | 4.75E-02 | 1.03E-01 |
| AQP12A | 0.0266  | 6.09E-01 | 7.21E-01 |
| AQP12B | 0.0456  | 3.82E-01 | 5.15E-01 |
| AQP1   | -0.1553 | 2.71E-03 | 9.93E-03 |
| AQP2   | -0.0369 | 4.79E-01 | 6.08E-01 |
| AQP3   | 0.0173  | 7.40E-01 | 8.24E-01 |
| AQP4   | -0.1878 | 2.76E-04 | 1.45E-03 |
| AQP5   | -0.0096 | 8.54E-01 | 9.06E-01 |
| AQP6   | -0.1092 | 3.56E-02 | 8.20E-02 |
| AQP7P1 | -0.1873 | 2.85E-04 | 1.49E-03 |
| AQP7P3 | -0.1443 | 5.35E-03 | 1.75E-02 |
| AQP7   | -0.2715 | 1.09E-07 | 1.57E-06 |
| AQP8   | -0.1305 | 1.18E-02 | 3.35E-02 |
| AQP9   | -0.2176 | 2.35E-05 | 1.78E-04 |
| AQPEP  | 0.1507  | 3.62E-03 | 1.26E-02 |
| AQR    | 0.0227  | 6.62E-01 | 7.63E-01 |
| ARAF   | -0.0463 | 3.73E-01 | 5.06E-01 |
| ARAP1  | 0.0786  | 1.31E-01 | 2.29E-01 |
| ARAP2  | 0.0204  | 6.95E-01 | 7.89E-01 |
| ARAP3  | -0.0472 | 3.65E-01 | 4.98E-01 |
| ARCN1  | 0.0411  | 4.30E-01 | 5.62E-01 |
| ARC    | -0.0474 | 3.62E-01 | 4.95E-01 |
| AREG   | -0.0099 | 8.50E-01 | 9.02E-01 |
| ARF1   | 0.1714  | 9.17E-04 | 3.99E-03 |
| ARF3   | -0.0059 | 9.10E-01 | 9.43E-01 |
| ARF4   | 0.0509  | 3.28E-01 | 4.59E-01 |

|           |         |          |          |
|-----------|---------|----------|----------|
| ARF5      | -0.0204 | 6.95E-01 | 7.90E-01 |
| ARF6      | -0.0547 | 2.93E-01 | 4.23E-01 |
| ARFGAP1   | 0.2293  | 8.12E-06 | 6.98E-05 |
| ARFGAP2   | 0.0260  | 6.18E-01 | 7.27E-01 |
| ARFGAP3   | -0.0268 | 6.07E-01 | 7.19E-01 |
| ARFGEF1   | 0.0072  | 8.90E-01 | 9.29E-01 |
| ARFGEF2   | -0.0628 | 2.28E-01 | 3.50E-01 |
| ARFIP1    | -0.1698 | 1.03E-03 | 4.39E-03 |
| ARFIP2    | 0.1544  | 2.86E-03 | 1.04E-02 |
| ARFRP1    | 0.0239  | 6.47E-01 | 7.51E-01 |
| ARG1      | -0.1155 | 2.61E-02 | 6.37E-02 |
| ARG2      | -0.1200 | 2.08E-02 | 5.30E-02 |
| ARGFXP2   | 0.1881  | 2.69E-04 | 1.42E-03 |
| ARGFX     | 0.0696  | 1.81E-01 | 2.93E-01 |
| ARGLU1    | 0.2995  | 3.96E-09 | 8.18E-08 |
| ARHGAP10  | -0.1347 | 9.40E-03 | 2.78E-02 |
| ARHGAP11A | 0.3603  | 8.17E-13 | 3.73E-11 |
| ARHGAP11B | 0.2728  | 9.36E-08 | 1.37E-06 |
| ARHGAP12  | -0.0030 | 9.55E-01 | 9.72E-01 |
| ARHGAP15  | -0.0616 | 2.36E-01 | 3.60E-01 |
| ARHGAP17  | 0.0139  | 7.90E-01 | 8.61E-01 |
| ARHGAP18  | 0.0571  | 2.72E-01 | 4.00E-01 |
| ARHGAP19  | 0.2207  | 1.80E-05 | 1.40E-04 |
| ARHGAP1   | 0.0431  | 4.08E-01 | 5.40E-01 |
| ARHGAP20  | -0.1276 | 1.39E-02 | 3.84E-02 |
| ARHGAP21  | -0.0233 | 6.55E-01 | 7.57E-01 |
| ARHGAP22  | 0.0659  | 2.06E-01 | 3.23E-01 |
| ARHGAP23  | -0.0968 | 6.25E-02 | 1.28E-01 |
| ARHGAP24  | -0.1334 | 1.01E-02 | 2.95E-02 |
| ARHGAP25  | -0.0948 | 6.83E-02 | 1.38E-01 |
| ARHGAP26  | -0.0011 | 9.84E-01 | 9.90E-01 |
| ARHGAP27  | 0.0801  | 1.24E-01 | 2.19E-01 |
| ARHGAP28  | 0.0823  | 1.13E-01 | 2.05E-01 |
| ARHGAP29  | -0.0733 | 1.59E-01 | 2.65E-01 |
| ARHGAP30  | -0.0652 | 2.10E-01 | 3.28E-01 |
| ARHGAP31  | -0.1805 | 4.78E-04 | 2.29E-03 |
| ARHGAP32  | 0.0667  | 2.00E-01 | 3.16E-01 |
| ARHGAP33  | 0.3964  | 2.06E-15 | 1.53E-13 |
| ARHGAP36  | -0.1630 | 1.63E-03 | 6.49E-03 |
| ARHGAP39  | 0.2443  | 1.92E-06 | 2.02E-05 |
| ARHGAP42  | -0.1779 | 5.76E-04 | 2.68E-03 |
| ARHGAP4   | 0.1515  | 3.43E-03 | 1.21E-02 |
| ARHGAP5   | -0.0448 | 3.90E-01 | 5.23E-01 |
| ARHGAP6   | -0.1470 | 4.55E-03 | 1.53E-02 |

|           |         |          |          |
|-----------|---------|----------|----------|
| ARHGAP8   | 0.0671  | 1.97E-01 | 3.13E-01 |
| ARHGAP9   | -0.0003 | 9.95E-01 | 9.97E-01 |
| ARHGDIA   | 0.1034  | 4.66E-02 | 1.02E-01 |
| ARHGDIB   | -0.0760 | 1.44E-01 | 2.46E-01 |
| ARHGDIG   | 0.0619  | 2.34E-01 | 3.57E-01 |
| ARHGEF10L | 0.0234  | 6.53E-01 | 7.56E-01 |
| ARHGEF10  | -0.1281 | 1.36E-02 | 3.76E-02 |
| ARHGEF11  | 0.3749  | 7.90E-14 | 4.25E-12 |
| ARHGEF12  | -0.2251 | 1.20E-05 | 9.87E-05 |
| ARHGEF15  | -0.1901 | 2.31E-04 | 1.24E-03 |
| ARHGEF16  | 0.1404  | 6.74E-03 | 2.11E-02 |
| ARHGEF17  | 0.0056  | 9.14E-01 | 9.46E-01 |
| ARHGEF18  | 0.0480  | 3.57E-01 | 4.89E-01 |
| ARHGEF19  | 0.0927  | 7.46E-02 | 1.48E-01 |
| ARHGEF1   | 0.2617  | 3.17E-07 | 4.10E-06 |
| ARHGEF2   | 0.2857  | 2.14E-08 | 3.68E-07 |
| ARHGEF33  | 0.0856  | 9.98E-02 | 1.86E-01 |
| ARHGEF35  | 0.0244  | 6.39E-01 | 7.45E-01 |
| ARHGEF37  | -0.0850 | 1.02E-01 | 1.88E-01 |
| ARHGEF38  | 0.1054  | 4.25E-02 | 9.46E-02 |
| ARHGEF3   | 0.0420  | 4.20E-01 | 5.52E-01 |
| ARHGEF4   | 0.0324  | 5.34E-01 | 6.56E-01 |
| ARHGEF5   | 0.0655  | 2.08E-01 | 3.26E-01 |
| ARHGEF6   | -0.0965 | 6.35E-02 | 1.30E-01 |
| ARHGEF7   | 0.1487  | 4.11E-03 | 1.41E-02 |
| ARHGEF9   | 0.0004  | 9.93E-01 | 9.96E-01 |
| ARID1A    | 0.0506  | 3.31E-01 | 4.62E-01 |
| ARID1B    | 0.1206  | 2.02E-02 | 5.17E-02 |
| ARID2     | 0.1117  | 3.16E-02 | 7.44E-02 |
| ARID3A    | 0.1941  | 1.69E-04 | 9.54E-04 |
| ARID3B    | 0.1959  | 1.46E-04 | 8.44E-04 |
| ARID3C    | -0.2243 | 1.29E-05 | 1.05E-04 |
| ARID4A    | -0.0898 | 8.43E-02 | 1.62E-01 |
| ARID4B    | 0.1398  | 7.01E-03 | 2.18E-02 |
| ARID5A    | -0.1130 | 2.95E-02 | 7.06E-02 |
| ARID5B    | 0.0715  | 1.70E-01 | 2.78E-01 |
| ARIH1     | -0.1114 | 3.20E-02 | 7.52E-02 |
| ARIH2     | 0.1550  | 2.76E-03 | 1.01E-02 |
| ARL10     | -0.0972 | 6.13E-02 | 1.26E-01 |
| ARL11     | -0.0504 | 3.33E-01 | 4.64E-01 |
| ARL13A    | 0.0475  | 3.61E-01 | 4.93E-01 |
| ARL13B    | 0.0240  | 6.45E-01 | 7.50E-01 |
| ARL14     | 0.0142  | 7.85E-01 | 8.57E-01 |
| ARL15     | -0.1766 | 6.34E-04 | 2.91E-03 |

|         |         |          |          |
|---------|---------|----------|----------|
| ARL16   | 0.2655  | 2.09E-07 | 2.82E-06 |
| ARL17A  | 0.1404  | 6.74E-03 | 2.11E-02 |
| ARL17B  | 0.1520  | 3.33E-03 | 1.18E-02 |
| ARL1    | 0.0013  | 9.80E-01 | 9.88E-01 |
| ARL2BP  | -0.1528 | 3.17E-03 | 1.13E-02 |
| ARL2    | 0.1524  | 3.26E-03 | 1.16E-02 |
| ARL3    | 0.1778  | 5.80E-04 | 2.69E-03 |
| ARL4A   | 0.1361  | 8.67E-03 | 2.60E-02 |
| ARL4C   | 0.0747  | 1.51E-01 | 2.55E-01 |
| ARL4D   | 0.0008  | 9.88E-01 | 9.92E-01 |
| ARL5A   | -0.0143 | 7.84E-01 | 8.57E-01 |
| ARL5B   | -0.0547 | 2.94E-01 | 4.23E-01 |
| ARL5C   | 0.0532  | 3.07E-01 | 4.36E-01 |
| ARL6IP1 | -0.0687 | 1.87E-01 | 3.00E-01 |
| ARL6IP4 | -0.0446 | 3.91E-01 | 5.24E-01 |
| ARL6IP5 | -0.2136 | 3.34E-05 | 2.40E-04 |
| ARL6IP6 | 0.3029  | 2.60E-09 | 5.54E-08 |
| ARL6    | 0.0350  | 5.02E-01 | 6.27E-01 |
| ARL8A   | 0.0070  | 8.92E-01 | 9.31E-01 |
| ARL8B   | -0.0240 | 6.45E-01 | 7.50E-01 |
| ARL9    | 0.1705  | 9.74E-04 | 4.21E-03 |
| ARMC10  | -0.1516 | 3.43E-03 | 1.21E-02 |
| ARMC1   | -0.0874 | 9.28E-02 | 1.75E-01 |
| ARMC2   | 0.2544  | 6.86E-07 | 8.10E-06 |
| ARMC3   | 0.2793  | 4.49E-08 | 7.12E-07 |
| ARMC4   | 0.0379  | 4.66E-01 | 5.96E-01 |
| ARMC5   | -0.1512 | 3.51E-03 | 1.23E-02 |
| ARMC6   | -0.0066 | 9.00E-01 | 9.37E-01 |
| ARMC7   | 0.1273  | 1.41E-02 | 3.88E-02 |
| ARMC8   | 0.1175  | 2.36E-02 | 5.89E-02 |
| ARMC9   | 0.0986  | 5.78E-02 | 1.20E-01 |
| ARMCX1  | 0.1385  | 7.54E-03 | 2.31E-02 |
| ARMCX2  | 0.0116  | 8.23E-01 | 8.84E-01 |
| ARMCX3  | 0.0095  | 8.55E-01 | 9.06E-01 |
| ARMCX5  | 0.1142  | 2.78E-02 | 6.73E-02 |
| ARMCX6  | 0.0545  | 2.95E-01 | 4.24E-01 |
| ARMS2   | -0.0569 | 2.74E-01 | 4.03E-01 |
| ARNT2   | 0.2608  | 3.48E-07 | 4.44E-06 |
| ARNTL2  | 0.1250  | 1.60E-02 | 4.28E-02 |
| ARNTL   | 0.0007  | 9.89E-01 | 9.93E-01 |
| ARNT    | 0.3419  | 1.29E-11 | 4.50E-10 |
| ARPC1A  | -0.0291 | 5.76E-01 | 6.93E-01 |
| ARPC1B  | -0.0112 | 8.29E-01 | 8.88E-01 |
| ARPC2   | 0.0635  | 2.23E-01 | 3.44E-01 |

|          |         |          |          |
|----------|---------|----------|----------|
| ARPC3    | 0.0864  | 9.66E-02 | 1.81E-01 |
| ARPC4    | 0.0710  | 1.72E-01 | 2.82E-01 |
| ARPC5L   | 0.1806  | 4.75E-04 | 2.27E-03 |
| ARPC5    | 0.3358  | 3.14E-11 | 1.03E-09 |
| ARPM1    | -0.0692 | 1.84E-01 | 2.96E-01 |
| ARPP19   | -0.0063 | 9.04E-01 | 9.39E-01 |
| ARPP21   | -0.1600 | 1.99E-03 | 7.66E-03 |
| ARR3     | 0.0425  | 4.14E-01 | 5.47E-01 |
| ARRB1    | 0.0567  | 2.76E-01 | 4.04E-01 |
| ARRB2    | 0.1093  | 3.53E-02 | 8.17E-02 |
| ARRDC1   | 0.0327  | 5.30E-01 | 6.53E-01 |
| ARRDC2   | 0.0376  | 4.71E-01 | 6.00E-01 |
| ARRDC3   | -0.0093 | 8.59E-01 | 9.09E-01 |
| ARRDC4   | -0.1529 | 3.15E-03 | 1.13E-02 |
| ARRDC5   | 0.0209  | 6.88E-01 | 7.84E-01 |
| ARSA     | -0.2347 | 4.91E-06 | 4.57E-05 |
| ARSB     | -0.1108 | 3.28E-02 | 7.69E-02 |
| ARSD     | -0.1932 | 1.81E-04 | 1.01E-03 |
| ARSE     | -0.1081 | 3.74E-02 | 8.56E-02 |
| ARSF     | -0.0427 | 4.12E-01 | 5.45E-01 |
| ARSG     | -0.0854 | 1.00E-01 | 1.86E-01 |
| ARSH     | 0.0122  | 8.15E-01 | 8.78E-01 |
| ARSI     | 0.1339  | 9.84E-03 | 2.89E-02 |
| ARSJ     | -0.0321 | 5.37E-01 | 6.59E-01 |
| ARSK     | -0.0524 | 3.14E-01 | 4.44E-01 |
| ART1     | -0.1277 | 1.38E-02 | 3.82E-02 |
| ART3     | 0.1275  | 1.40E-02 | 3.86E-02 |
| ART4     | -0.1042 | 4.49E-02 | 9.89E-02 |
| ART5     | -0.0053 | 9.20E-01 | 9.49E-01 |
| ARTN     | 0.1607  | 1.90E-03 | 7.37E-03 |
| ARV1     | 0.1439  | 5.48E-03 | 1.78E-02 |
| ARVCF    | -0.0356 | 4.95E-01 | 6.21E-01 |
| ARX      | 0.0353  | 4.98E-01 | 6.24E-01 |
| AR       | -0.2067 | 6.01E-05 | 3.95E-04 |
| AS3MT    | -0.0847 | 1.03E-01 | 1.90E-01 |
| ASAH1    | -0.0841 | 1.06E-01 | 1.94E-01 |
| ASAH2B   | -0.0470 | 3.67E-01 | 4.99E-01 |
| ASAH2    | -0.1221 | 1.87E-02 | 4.86E-02 |
| ASAM     | -0.0508 | 3.29E-01 | 4.60E-01 |
| ASAP1IT1 | -0.0117 | 8.23E-01 | 8.84E-01 |
| ASAP1    | 0.1321  | 1.09E-02 | 3.12E-02 |
| ASAP2    | 0.0742  | 1.54E-01 | 2.58E-01 |
| ASAP3    | -0.1047 | 4.38E-02 | 9.69E-02 |
| ASB10    | 0.0144  | 7.82E-01 | 8.55E-01 |



|        |         |          |          |
|--------|---------|----------|----------|
| ASB11  | 0.1823  | 4.17E-04 | 2.05E-03 |
| ASB12  | 0.1609  | 1.88E-03 | 7.31E-03 |
| ASB13  | -0.1912 | 2.12E-04 | 1.16E-03 |
| ASB14  | 0.1468  | 4.62E-03 | 1.54E-02 |
| ASB15  | -0.1267 | 1.46E-02 | 3.98E-02 |
| ASB16  | 0.2875  | 1.71E-08 | 3.02E-07 |
| ASB17  | 0.1312  | 1.14E-02 | 3.26E-02 |
| ASB18  | 0.0226  | 6.64E-01 | 7.64E-01 |
| ASB1   | 0.1177  | 2.33E-02 | 5.82E-02 |
| ASB2   | -0.0138 | 7.91E-01 | 8.61E-01 |
| ASB3   | 0.1961  | 1.44E-04 | 8.35E-04 |
| ASB4   | -0.2154 | 2.86E-05 | 2.10E-04 |
| ASB5   | -0.0921 | 7.66E-02 | 1.51E-01 |
| ASB6   | 0.3365  | 2.84E-11 | 9.41E-10 |
| ASB7   | -0.1472 | 4.50E-03 | 1.51E-02 |
| ASB8   | -0.2511 | 9.65E-07 | 1.10E-05 |
| ASB9   | 0.1820  | 4.26E-04 | 2.08E-03 |
| ASCC1  | -0.1573 | 2.38E-03 | 8.90E-03 |
| ASCC2  | -0.0032 | 9.51E-01 | 9.69E-01 |
| ASCC3  | 0.0803  | 1.23E-01 | 2.18E-01 |
| ASCL1  | -0.0650 | 2.12E-01 | 3.31E-01 |
| ASCL2  | 0.1032  | 4.71E-02 | 1.03E-01 |
| ASCL3  | 0.1274  | 1.40E-02 | 3.86E-02 |
| ASCL4  | 0.0733  | 1.59E-01 | 2.65E-01 |
| ASF1A  | 0.2544  | 6.86E-07 | 8.10E-06 |
| ASF1B  | 0.4220  | 1.87E-17 | 2.30E-15 |
| ASFMR1 | 0.1738  | 7.74E-04 | 3.45E-03 |
| ASGR1  | -0.0859 | 9.85E-02 | 1.84E-01 |
| ASGR2  | -0.1135 | 2.88E-02 | 6.92E-02 |
| ASH1L  | 0.3165  | 4.45E-10 | 1.15E-08 |
| ASH2L  | 0.0592  | 2.55E-01 | 3.81E-01 |
| ASIP   | -0.2625 | 2.89E-07 | 3.79E-06 |
| ASL    | -0.2648 | 2.26E-07 | 3.02E-06 |
| ASMTL  | -0.1961 | 1.44E-04 | 8.35E-04 |
| ASMT   | 0.1822  | 4.20E-04 | 2.06E-03 |
| ASNA1  | -0.0697 | 1.80E-01 | 2.92E-01 |
| ASNSD1 | -0.0397 | 4.46E-01 | 5.78E-01 |
| ASNS   | 0.1287  | 1.31E-02 | 3.65E-02 |
| ASPA   | -0.2042 | 7.46E-05 | 4.76E-04 |
| ASPDH  | -0.2685 | 1.52E-07 | 2.11E-06 |
| ASPG   | -0.1378 | 7.85E-03 | 2.40E-02 |
| ASPHD1 | 0.0240  | 6.45E-01 | 7.50E-01 |
| ASPHD2 | 0.1848  | 3.47E-04 | 1.76E-03 |
| ASPH   | 0.0518  | 3.19E-01 | 4.49E-01 |

|         |         |          |          |
|---------|---------|----------|----------|
| ASPM    | 0.4480  | 1.02E-19 | 2.42E-17 |
| ASPN    | -0.0755 | 1.47E-01 | 2.49E-01 |
| ASPRV1  | -0.1206 | 2.01E-02 | 5.16E-02 |
| ASPSCR1 | 0.0131  | 8.01E-01 | 8.69E-01 |
| ASRGL1  | 0.2833  | 2.82E-08 | 4.66E-07 |
| ASS1    | -0.2610 | 3.40E-07 | 4.37E-06 |
| ASTE1   | 0.1156  | 2.59E-02 | 6.35E-02 |
| ASTL    | 0.0638  | 2.20E-01 | 3.40E-01 |
| ASTN1   | -0.2137 | 3.33E-05 | 2.39E-04 |
| ASTN2   | 0.0169  | 7.46E-01 | 8.28E-01 |
| ASXL1   | 0.3090  | 1.20E-09 | 2.79E-08 |
| ASXL2   | -0.0689 | 1.85E-01 | 2.98E-01 |
| ASXL3   | -0.1767 | 6.27E-04 | 2.89E-03 |
| ASZ1    | 0.0723  | 1.64E-01 | 2.72E-01 |
| ATAD1   | -0.2072 | 5.79E-05 | 3.84E-04 |
| ATAD2B  | 0.0807  | 1.21E-01 | 2.15E-01 |
| ATAD2   | 0.3048  | 2.05E-09 | 4.53E-08 |
| ATAD3A  | 0.0185  | 7.22E-01 | 8.12E-01 |
| ATAD3B  | 0.1545  | 2.84E-03 | 1.03E-02 |
| ATAD3C  | -0.0342 | 5.12E-01 | 6.36E-01 |
| ATAD5   | 0.4342  | 1.72E-18 | 2.81E-16 |
| ATCAY   | -0.0154 | 7.68E-01 | 8.43E-01 |
| ATE1    | -0.1012 | 5.15E-02 | 1.10E-01 |
| ATF1    | 0.1297  | 1.24E-02 | 3.48E-02 |
| ATF2    | -0.0170 | 7.44E-01 | 8.27E-01 |
| ATF3    | -0.1347 | 9.37E-03 | 2.78E-02 |
| ATF4    | 0.1417  | 6.25E-03 | 1.98E-02 |
| ATF5    | 0.0314  | 5.47E-01 | 6.67E-01 |
| ATF6B   | 0.1643  | 1.49E-03 | 6.02E-03 |
| ATF6    | 0.1101  | 3.39E-02 | 7.91E-02 |
| ATF7IP2 | 0.0972  | 6.15E-02 | 1.27E-01 |
| ATF7IP  | -0.0029 | 9.56E-01 | 9.72E-01 |
| ATF7    | 0.0822  | 1.14E-01 | 2.06E-01 |
| ATG10   | 0.0074  | 8.86E-01 | 9.27E-01 |
| ATG12   | 0.0520  | 3.18E-01 | 4.48E-01 |
| ATG16L1 | 0.0322  | 5.36E-01 | 6.58E-01 |
| ATG16L2 | 0.2464  | 1.55E-06 | 1.66E-05 |
| ATG2A   | -0.2066 | 6.08E-05 | 3.99E-04 |
| ATG2B   | -0.0562 | 2.80E-01 | 4.09E-01 |
| ATG3    | 0.0299  | 5.66E-01 | 6.84E-01 |
| ATG4A   | -0.1913 | 2.10E-04 | 1.15E-03 |
| ATG4B   | 0.2007  | 9.95E-05 | 6.06E-04 |
| ATG4C   | -0.1008 | 5.23E-02 | 1.11E-01 |
| ATG4D   | 0.0075  | 8.85E-01 | 9.26E-01 |

|         |         |          |          |
|---------|---------|----------|----------|
| ATG5    | 0.1261  | 1.51E-02 | 4.08E-02 |
| ATG7    | -0.0232 | 6.57E-01 | 7.58E-01 |
| ATG9A   | 0.0493  | 3.43E-01 | 4.75E-01 |
| ATG9B   | 0.1437  | 5.54E-03 | 1.79E-02 |
| ATHL1   | 0.0199  | 7.03E-01 | 7.96E-01 |
| ATIC    | 0.1785  | 5.51E-04 | 2.58E-03 |
| ATL1    | -0.1112 | 3.22E-02 | 7.57E-02 |
| ATL2    | 0.0451  | 3.86E-01 | 5.19E-01 |
| ATL3    | -0.1076 | 3.84E-02 | 8.73E-02 |
| ATMIN   | -0.1933 | 1.80E-04 | 1.00E-03 |
| ATM     | 0.0592  | 2.56E-01 | 3.81E-01 |
| ATN1    | 0.2268  | 1.03E-05 | 8.64E-05 |
| ATOH1   | 0.1317  | 1.11E-02 | 3.18E-02 |
| ATOH7   | -0.0257 | 6.21E-01 | 7.31E-01 |
| ATOH8   | -0.1926 | 1.90E-04 | 1.06E-03 |
| ATOX1   | -0.0945 | 6.91E-02 | 1.39E-01 |
| ATP10A  | -0.0218 | 6.76E-01 | 7.75E-01 |
| ATP10B  | 0.1443  | 5.34E-03 | 1.75E-02 |
| ATP10D  | -0.0646 | 2.14E-01 | 3.34E-01 |
| ATP11A  | 0.1394  | 7.15E-03 | 2.21E-02 |
| ATP11B  | 0.0603  | 2.47E-01 | 3.71E-01 |
| ATP11C  | -0.1139 | 2.83E-02 | 6.82E-02 |
| ATP12A  | 0.1054  | 4.26E-02 | 9.47E-02 |
| ATP13A1 | 0.1010  | 5.18E-02 | 1.11E-01 |
| ATP13A2 | 0.1705  | 9.77E-04 | 4.22E-03 |
| ATP13A3 | -0.0249 | 6.32E-01 | 7.39E-01 |
| ATP13A4 | -0.0072 | 8.90E-01 | 9.29E-01 |
| ATP13A5 | -0.0258 | 6.20E-01 | 7.29E-01 |
| ATP1A1  | 0.1913  | 2.10E-04 | 1.15E-03 |
| ATP1A2  | -0.1799 | 4.99E-04 | 2.37E-03 |
| ATP1A3  | -0.0501 | 3.36E-01 | 4.67E-01 |
| ATP1A4  | 0.0619  | 2.34E-01 | 3.57E-01 |
| ATP1B1  | 0.1934  | 1.79E-04 | 1.00E-03 |
| ATP1B2  | -0.0795 | 1.27E-01 | 2.23E-01 |
| ATP1B3  | 0.1403  | 6.80E-03 | 2.12E-02 |
| ATP1B4  | -0.0180 | 7.30E-01 | 8.17E-01 |
| ATP2A1  | 0.0360  | 4.89E-01 | 6.16E-01 |
| ATP2A2  | 0.0716  | 1.69E-01 | 2.78E-01 |
| ATP2A3  | -0.0891 | 8.67E-02 | 1.66E-01 |
| ATP2B1  | 0.0832  | 1.10E-01 | 2.00E-01 |
| ATP2B2  | -0.0645 | 2.15E-01 | 3.35E-01 |
| ATP2B3  | 0.0083  | 8.73E-01 | 9.18E-01 |
| ATP2B4  | 0.0335  | 5.20E-01 | 6.44E-01 |
| ATP2C1  | -0.0798 | 1.25E-01 | 2.20E-01 |

|          |         |          |          |
|----------|---------|----------|----------|
| ATP2C2   | 0.2002  | 1.03E-04 | 6.24E-04 |
| ATP4A    | 0.1781  | 5.69E-04 | 2.65E-03 |
| ATP4B    | 0.0609  | 2.42E-01 | 3.67E-01 |
| ATP5A1   | -0.2871 | 1.81E-08 | 3.17E-07 |
| ATP5B    | -0.2663 | 1.92E-07 | 2.62E-06 |
| ATP5C1   | -0.0622 | 2.32E-01 | 3.55E-01 |
| ATP5D    | -0.1457 | 4.92E-03 | 1.63E-02 |
| ATP5EP2  | -0.0120 | 8.17E-01 | 8.80E-01 |
| ATP5E    | 0.0237  | 6.49E-01 | 7.53E-01 |
| ATP5F1   | -0.1644 | 1.48E-03 | 5.98E-03 |
| ATP5G1   | 0.1203  | 2.04E-02 | 5.22E-02 |
| ATP5G2   | 0.1534  | 3.06E-03 | 1.10E-02 |
| ATP5G3   | -0.1772 | 6.08E-04 | 2.80E-03 |
| ATP5H    | 0.0253  | 6.27E-01 | 7.35E-01 |
| ATP5I    | -0.0305 | 5.58E-01 | 6.77E-01 |
| ATP5J2   | -0.0676 | 1.94E-01 | 3.09E-01 |
| ATP5J    | -0.1085 | 3.67E-02 | 8.42E-02 |
| ATP5L2   | 0.0162  | 7.56E-01 | 8.36E-01 |
| ATP5L    | -0.0049 | 9.25E-01 | 9.52E-01 |
| ATP5O    | -0.0526 | 3.13E-01 | 4.42E-01 |
| ATP5SL   | -0.0154 | 7.68E-01 | 8.44E-01 |
| ATP5S    | -0.0726 | 1.63E-01 | 2.70E-01 |
| ATP6AP1L | -0.0404 | 4.38E-01 | 5.70E-01 |
| ATP6AP1  | 0.1578  | 2.30E-03 | 8.67E-03 |
| ATP6AP2  | -0.0575 | 2.69E-01 | 3.97E-01 |
| ATP6V0A1 | -0.0267 | 6.08E-01 | 7.20E-01 |
| ATP6V0A2 | 0.1289  | 1.29E-02 | 3.61E-02 |
| ATP6V0A4 | 0.0764  | 1.42E-01 | 2.43E-01 |
| ATP6V0B  | -0.0103 | 8.44E-01 | 8.98E-01 |
| ATP6V0C  | -0.0300 | 5.65E-01 | 6.83E-01 |
| ATP6V0D1 | -0.2532 | 7.75E-07 | 9.03E-06 |
| ATP6V0D2 | 0.1733  | 8.02E-04 | 3.56E-03 |
| ATP6V0E1 | -0.1167 | 2.45E-02 | 6.06E-02 |
| ATP6V0E2 | -0.2369 | 3.97E-06 | 3.81E-05 |
| ATP6V1A  | -0.1564 | 2.52E-03 | 9.33E-03 |
| ATP6V1B1 | 0.1460  | 4.83E-03 | 1.60E-02 |
| ATP6V1B2 | -0.1277 | 1.38E-02 | 3.82E-02 |
| ATP6V1C1 | 0.0591  | 2.56E-01 | 3.82E-01 |
| ATP6V1C2 | 0.2730  | 9.18E-08 | 1.34E-06 |
| ATP6V1D  | -0.0559 | 2.83E-01 | 4.11E-01 |
| ATP6V1E1 | 0.1235  | 1.74E-02 | 4.57E-02 |
| ATP6V1E2 | 0.0533  | 3.06E-01 | 4.36E-01 |
| ATP6V1F  | -0.0144 | 7.82E-01 | 8.55E-01 |
| ATP6V1G1 | -0.0241 | 6.43E-01 | 7.48E-01 |

|          |         |          |          |
|----------|---------|----------|----------|
| ATP6V1G2 | -0.0440 | 3.98E-01 | 5.31E-01 |
| ATP6V1G3 | 0.1134  | 2.90E-02 | 6.96E-02 |
| ATP6V1H  | -0.0734 | 1.58E-01 | 2.64E-01 |
| ATP7A    | 0.1857  | 3.23E-04 | 1.66E-03 |
| ATP7B    | -0.1441 | 5.42E-03 | 1.77E-02 |
| ATP8A1   | -0.0283 | 5.87E-01 | 7.02E-01 |
| ATP8A2   | -0.0043 | 9.35E-01 | 9.59E-01 |
| ATP8B1   | -0.1043 | 4.47E-02 | 9.84E-02 |
| ATP8B2   | 0.0871  | 9.41E-02 | 1.77E-01 |
| ATP8B3   | 0.0004  | 9.94E-01 | 9.96E-01 |
| ATP8B4   | -0.1628 | 1.65E-03 | 6.57E-03 |
| ATP8B5P  | 0.0298  | 5.67E-01 | 6.85E-01 |
| ATP9A    | 0.0441  | 3.97E-01 | 5.30E-01 |
| ATP9B    | 0.1228  | 1.80E-02 | 4.72E-02 |
| ATPAF1   | -0.1892 | 2.48E-04 | 1.32E-03 |
| ATPAF2   | -0.1485 | 4.16E-03 | 1.42E-02 |
| ATPBD4   | -0.0742 | 1.54E-01 | 2.59E-01 |
| ATPIF1   | -0.1163 | 2.51E-02 | 6.17E-02 |
| ATRIP    | 0.2881  | 1.60E-08 | 2.85E-07 |
| ATRNL1   | -0.0137 | 7.92E-01 | 8.62E-01 |
| ATRN     | 0.0044  | 9.32E-01 | 9.58E-01 |
| ATRX     | 0.0416  | 4.24E-01 | 5.57E-01 |
| ATR      | 0.0607  | 2.43E-01 | 3.68E-01 |
| ATXN10   | 0.0625  | 2.30E-01 | 3.53E-01 |
| ATXN1L   | -0.1131 | 2.94E-02 | 7.03E-02 |
| ATXN1    | -0.0365 | 4.83E-01 | 6.12E-01 |
| ATXN2L   | 0.2819  | 3.33E-08 | 5.43E-07 |
| ATXN2    | 0.1658  | 1.35E-03 | 5.53E-03 |
| ATXN3L   | 0.1053  | 4.26E-02 | 9.47E-02 |
| ATXN3    | -0.1255 | 1.56E-02 | 4.19E-02 |
| ATXN7L1  | -0.2311 | 6.91E-06 | 6.11E-05 |
| ATXN7L2  | 0.2536  | 7.45E-07 | 8.72E-06 |
| ATXN7L3B | 0.0365  | 4.83E-01 | 6.12E-01 |
| ATXN7L3  | 0.2699  | 1.29E-07 | 1.83E-06 |
| ATXN7    | 0.0590  | 2.57E-01 | 3.82E-01 |
| AUH      | -0.2656 | 2.08E-07 | 2.81E-06 |
| AUP1     | 0.1003  | 5.36E-02 | 1.13E-01 |
| AURKAIP1 | -0.1095 | 3.50E-02 | 8.10E-02 |
| AURKAPS1 | 0.4231  | 1.53E-17 | 1.95E-15 |
| AURKA    | 0.3496  | 4.15E-12 | 1.64E-10 |
| AURKB    | 0.4100  | 1.80E-16 | 1.74E-14 |
| AURKC    | -0.0986 | 5.77E-02 | 1.20E-01 |
| AUTS2    | -0.1138 | 2.84E-02 | 6.84E-02 |
| AVEN     | -0.1880 | 2.71E-04 | 1.43E-03 |

|          |         |          |          |
|----------|---------|----------|----------|
| AVIL     | 0.0285  | 5.84E-01 | 7.00E-01 |
| AVL9     | 0.0106  | 8.39E-01 | 8.94E-01 |
| AVPI1    | -0.1587 | 2.17E-03 | 8.23E-03 |
| AVPR1A   | -0.1340 | 9.79E-03 | 2.87E-02 |
| AVPR1B   | 0.1024  | 4.88E-02 | 1.06E-01 |
| AVPR2    | -0.1631 | 1.62E-03 | 6.47E-03 |
| AVP      | 0.0612  | 2.40E-01 | 3.64E-01 |
| AWAT1    | 0.0288  | 5.80E-01 | 6.96E-01 |
| AWAT2    | -0.0705 | 1.76E-01 | 2.86E-01 |
| AXIN1    | 0.1866  | 3.02E-04 | 1.57E-03 |
| AXIN2    | -0.0159 | 7.60E-01 | 8.38E-01 |
| AXL      | -0.1115 | 3.17E-02 | 7.47E-02 |
| AZGP1    | -0.2436 | 2.05E-06 | 2.13E-05 |
| AZI1     | 0.4666  | 1.85E-21 | 5.50E-19 |
| AZI2     | 0.0625  | 2.30E-01 | 3.53E-01 |
| AZIN1    | -0.0069 | 8.95E-01 | 9.33E-01 |
| AZU1     | -0.0072 | 8.89E-01 | 9.29E-01 |
| B2M      | -0.2043 | 7.36E-05 | 4.71E-04 |
| B3GALNT1 | 0.2057  | 6.55E-05 | 4.25E-04 |
| B3GALNT2 | 0.1929  | 1.85E-04 | 1.03E-03 |
| B3GALT1  | -0.0396 | 4.47E-01 | 5.79E-01 |
| B3GALT2  | -0.0727 | 1.62E-01 | 2.70E-01 |
| B3GALT4  | 0.0456  | 3.81E-01 | 5.15E-01 |
| B3GALT5  | 0.1014  | 5.10E-02 | 1.09E-01 |
| B3GALT6  | 0.0262  | 6.15E-01 | 7.25E-01 |
| B3GALTL  | 0.0265  | 6.12E-01 | 7.23E-01 |
| B3GAT1   | 0.0957  | 6.56E-02 | 1.33E-01 |
| B3GAT2   | 0.1325  | 1.06E-02 | 3.07E-02 |
| B3GAT3   | -0.0292 | 5.75E-01 | 6.92E-01 |
| B3GNT1   | -0.0929 | 7.40E-02 | 1.47E-01 |
| B3GNT2   | -0.0474 | 3.62E-01 | 4.95E-01 |
| B3GNT3   | 0.1353  | 9.05E-03 | 2.70E-02 |
| B3GNT4   | 0.0791  | 1.28E-01 | 2.25E-01 |
| B3GNT5   | 0.1393  | 7.19E-03 | 2.22E-02 |
| B3GNT6   | 0.0538  | 3.02E-01 | 4.31E-01 |
| B3GNT7   | 0.0961  | 6.44E-02 | 1.31E-01 |
| B3GNT8   | 0.0536  | 3.03E-01 | 4.33E-01 |
| B3GNT9   | 0.0073  | 8.89E-01 | 9.29E-01 |
| B3GNTL1  | 0.2037  | 7.73E-05 | 4.90E-04 |
| B4GALNT1 | 0.0844  | 1.04E-01 | 1.92E-01 |
| B4GALNT2 | 0.2430  | 2.18E-06 | 2.25E-05 |
| B4GALNT3 | 0.0201  | 6.99E-01 | 7.92E-01 |
| B4GALNT4 | 0.1711  | 9.38E-04 | 4.07E-03 |
| B4GALT1  | 0.0029  | 9.55E-01 | 9.72E-01 |

|          |         |          |          |
|----------|---------|----------|----------|
| B4GALT2  | 0.0251  | 6.30E-01 | 7.38E-01 |
| B4GALT3  | 0.4409  | 4.48E-19 | 9.20E-17 |
| B4GALT4  | 0.0635  | 2.23E-01 | 3.44E-01 |
| B4GALT5  | 0.0837  | 1.07E-01 | 1.96E-01 |
| B4GALT6  | 0.0887  | 8.81E-02 | 1.68E-01 |
| B4GALT7  | 0.0135  | 7.96E-01 | 8.65E-01 |
| B9D1     | 0.0011  | 9.83E-01 | 9.89E-01 |
| B9D2     | 0.0172  | 7.41E-01 | 8.25E-01 |
| BAALC    | -0.1128 | 2.98E-02 | 7.10E-02 |
| BAAT     | -0.2299 | 7.70E-06 | 6.67E-05 |
| BACE1    | -0.2391 | 3.20E-06 | 3.14E-05 |
| BACE2    | 0.0559  | 2.83E-01 | 4.11E-01 |
| BACH1    | 0.0389  | 4.55E-01 | 5.86E-01 |
| BACH2    | -0.0706 | 1.75E-01 | 2.85E-01 |
| BAD      | 0.0166  | 7.51E-01 | 8.32E-01 |
| BAG1     | -0.0934 | 7.23E-02 | 1.44E-01 |
| BAG2     | 0.1067  | 4.00E-02 | 9.02E-02 |
| BAG3     | -0.0156 | 7.65E-01 | 8.41E-01 |
| BAG4     | -0.0372 | 4.75E-01 | 6.04E-01 |
| BAG5     | 0.0528  | 3.11E-01 | 4.40E-01 |
| BAGE2    | 0.0687  | 1.86E-01 | 3.00E-01 |
| BAGE     | 0.0315  | 5.45E-01 | 6.65E-01 |
| BAHCC1   | 0.1568  | 2.45E-03 | 9.10E-03 |
| BAHD1    | -0.0548 | 2.92E-01 | 4.21E-01 |
| BAI1     | 0.0938  | 7.12E-02 | 1.42E-01 |
| BAI2     | 0.1408  | 6.62E-03 | 2.08E-02 |
| BAI3     | -0.1103 | 3.37E-02 | 7.87E-02 |
| BAIAP2L1 | 0.0796  | 1.26E-01 | 2.22E-01 |
| BAIAP2L2 | 0.1863  | 3.09E-04 | 1.60E-03 |
| BAIAP2   | -0.1338 | 9.89E-03 | 2.90E-02 |
| BAIAP3   | -0.0420 | 4.20E-01 | 5.53E-01 |
| BAK1     | 0.1651  | 1.41E-03 | 5.75E-03 |
| BAMBI    | 0.0523  | 3.15E-01 | 4.45E-01 |
| BANF1    | 0.0984  | 5.82E-02 | 1.21E-01 |
| BANF2    | 0.0965  | 6.34E-02 | 1.30E-01 |
| BANK1    | 0.0675  | 1.95E-01 | 3.10E-01 |
| BANP     | 0.0171  | 7.43E-01 | 8.27E-01 |
| BAP1     | 0.0347  | 5.05E-01 | 6.30E-01 |
| BARD1    | 0.1820  | 4.27E-04 | 2.08E-03 |
| BARHL1   | 0.0148  | 7.76E-01 | 8.50E-01 |
| BARHL2   | 0.1117  | 3.14E-02 | 7.42E-02 |
| BARX1    | 0.0527  | 3.11E-01 | 4.41E-01 |
| BARX2    | 0.1099  | 3.44E-02 | 7.99E-02 |
| BASE     | 0.2465  | 1.54E-06 | 1.66E-05 |

|         |         |          |          |
|---------|---------|----------|----------|
| BASP1   | -0.1172 | 2.40E-02 | 5.97E-02 |
| BAT1    | 0.2985  | 4.48E-09 | 9.08E-08 |
| BAT2L1  | 0.1684  | 1.13E-03 | 4.79E-03 |
| BAT2L2  | 0.3680  | 2.44E-13 | 1.21E-11 |
| BAT2    | 0.2303  | 7.40E-06 | 6.47E-05 |
| BAT3    | 0.1275  | 1.40E-02 | 3.85E-02 |
| BAT4    | 0.1217  | 1.91E-02 | 4.94E-02 |
| BAT5    | -0.0572 | 2.72E-01 | 3.99E-01 |
| BATF2   | 0.0173  | 7.40E-01 | 8.25E-01 |
| BATF3   | -0.0265 | 6.11E-01 | 7.22E-01 |
| BATF    | -0.0263 | 6.13E-01 | 7.24E-01 |
| BAX     | 0.1270  | 1.44E-02 | 3.94E-02 |
| BAZ1A   | 0.0863  | 9.70E-02 | 1.82E-01 |
| BAZ1B   | 0.0525  | 3.13E-01 | 4.42E-01 |
| BAZ2A   | 0.2402  | 2.88E-06 | 2.86E-05 |
| BAZ2B   | -0.0967 | 6.27E-02 | 1.29E-01 |
| BBC3    | 0.0953  | 6.67E-02 | 1.35E-01 |
| BBOX1   | -0.2978 | 4.92E-09 | 9.85E-08 |
| BBS10   | -0.0007 | 9.89E-01 | 9.93E-01 |
| BBS12   | 0.0201  | 6.99E-01 | 7.93E-01 |
| BBS1    | -0.1244 | 1.65E-02 | 4.39E-02 |
| BBS2    | -0.2280 | 9.19E-06 | 7.80E-05 |
| BBS4    | -0.0392 | 4.51E-01 | 5.83E-01 |
| BBS5    | 0.0751  | 1.49E-01 | 2.52E-01 |
| BBS7    | 0.0717  | 1.68E-01 | 2.76E-01 |
| BBS9    | -0.0797 | 1.26E-01 | 2.22E-01 |
| BBX     | -0.0245 | 6.39E-01 | 7.45E-01 |
| BCAM    | -0.0037 | 9.44E-01 | 9.66E-01 |
| BCAN    | 0.0896  | 8.49E-02 | 1.63E-01 |
| BCAP29  | -0.1416 | 6.31E-03 | 2.00E-02 |
| BCAP31  | 0.0459  | 3.78E-01 | 5.11E-01 |
| BCAR1   | -0.1680 | 1.16E-03 | 4.87E-03 |
| BCAR3   | -0.0265 | 6.11E-01 | 7.22E-01 |
| BCAR4   | 0.0491  | 3.46E-01 | 4.78E-01 |
| BCAS1   | 0.0721  | 1.66E-01 | 2.74E-01 |
| BCAS2   | 0.0523  | 3.15E-01 | 4.45E-01 |
| BCAS3   | -0.0986 | 5.77E-02 | 1.20E-01 |
| BCAS4   | 0.1060  | 4.12E-02 | 9.24E-02 |
| BCAT1   | 0.0618  | 2.35E-01 | 3.58E-01 |
| BCAT2   | 0.1494  | 3.92E-03 | 1.35E-02 |
| BCCIP   | -0.0144 | 7.82E-01 | 8.55E-01 |
| BCDIN3D | 0.0429  | 4.10E-01 | 5.42E-01 |
| BCHE    | -0.1178 | 2.33E-02 | 5.81E-02 |
| BCKDHA  | -0.2764 | 6.25E-08 | 9.53E-07 |



|         |         |          |          |
|---------|---------|----------|----------|
| BCKDHB  | -0.2443 | 1.92E-06 | 2.02E-05 |
| BCKDK   | -0.3184 | 3.46E-10 | 9.21E-09 |
| BCL10   | 0.1137  | 2.86E-02 | 6.87E-02 |
| BCL11A  | 0.1377  | 7.92E-03 | 2.41E-02 |
| BCL11B  | -0.0124 | 8.11E-01 | 8.76E-01 |
| BCL2A1  | 0.0245  | 6.39E-01 | 7.45E-01 |
| BCL2L10 | -0.0294 | 5.72E-01 | 6.90E-01 |
| BCL2L11 | 0.2263  | 1.08E-05 | 9.01E-05 |
| BCL2L12 | 0.2338  | 5.33E-06 | 4.89E-05 |
| BCL2L13 | -0.1118 | 3.14E-02 | 7.41E-02 |
| BCL2L14 | 0.0984  | 5.82E-02 | 1.21E-01 |
| BCL2L15 | 0.1924  | 1.93E-04 | 1.07E-03 |
| BCL2L1  | -0.0940 | 7.06E-02 | 1.41E-01 |
| BCL2L2  | 0.0262  | 6.14E-01 | 7.24E-01 |
| BCL2    | -0.1305 | 1.19E-02 | 3.37E-02 |
| BCL3    | 0.0854  | 1.00E-01 | 1.86E-01 |
| BCL6B   | -0.1337 | 9.92E-03 | 2.90E-02 |
| BCL6    | 0.0071  | 8.92E-01 | 9.31E-01 |
| BCL7A   | 0.1530  | 3.13E-03 | 1.12E-02 |
| BCL7B   | -0.1468 | 4.60E-03 | 1.54E-02 |
| BCL7C   | 0.1380  | 7.77E-03 | 2.37E-02 |
| BCL8    | -0.0234 | 6.53E-01 | 7.56E-01 |
| BCL9L   | 0.1055  | 4.22E-02 | 9.40E-02 |
| BCL9    | 0.4930  | 4.03E-24 | 2.06E-21 |
| BCLAF1  | 0.1759  | 6.64E-04 | 3.03E-03 |
| BCMO1   | -0.0743 | 1.53E-01 | 2.58E-01 |
| BCO2    | -0.2462 | 1.59E-06 | 1.70E-05 |
| BCORL1  | 0.1919  | 2.01E-04 | 1.11E-03 |
| BCORL2  | -0.0017 | 9.73E-01 | 9.83E-01 |
| BCOR    | 0.2114  | 4.06E-05 | 2.83E-04 |
| BCR     | 0.0063  | 9.04E-01 | 9.39E-01 |
| BCS1L   | 0.0357  | 4.93E-01 | 6.19E-01 |
| BCYRN1  | 0.0238  | 6.48E-01 | 7.52E-01 |
| BDH1    | -0.2928 | 9.03E-09 | 1.69E-07 |
| BDH2    | -0.2622 | 2.99E-07 | 3.90E-06 |
| BDKRB1  | 0.0151  | 7.72E-01 | 8.47E-01 |
| BDKRB2  | -0.1224 | 1.84E-02 | 4.80E-02 |
| BDNFOS  | -0.1902 | 2.30E-04 | 1.24E-03 |
| BDNF    | -0.0458 | 3.79E-01 | 5.12E-01 |
| BDP1    | 0.0389  | 4.56E-01 | 5.86E-01 |
| BEAN    | -0.0453 | 3.84E-01 | 5.17E-01 |
| BECN1   | 0.0072  | 8.90E-01 | 9.30E-01 |
| BEGAIN  | 0.0432  | 4.06E-01 | 5.39E-01 |
| BEND2   | -0.0387 | 4.57E-01 | 5.88E-01 |

|         |         |          |          |
|---------|---------|----------|----------|
| BEND3   | 0.3707  | 1.59E-13 | 8.19E-12 |
| BEND4   | -0.0528 | 3.11E-01 | 4.40E-01 |
| BEND5   | -0.0262 | 6.16E-01 | 7.25E-01 |
| BEND6   | -0.0299 | 5.66E-01 | 6.84E-01 |
| BEND7   | 0.0559  | 2.83E-01 | 4.12E-01 |
| BEST1   | 0.1497  | 3.85E-03 | 1.33E-02 |
| BEST2   | 0.0704  | 1.76E-01 | 2.86E-01 |
| BEST3   | -0.0882 | 8.98E-02 | 1.71E-01 |
| BEST4   | 0.1683  | 1.14E-03 | 4.81E-03 |
| BET1L   | -0.0961 | 6.45E-02 | 1.31E-01 |
| BET1    | -0.1224 | 1.83E-02 | 4.78E-02 |
| BET3L   | -0.0685 | 1.88E-01 | 3.02E-01 |
| BEX1    | 0.0335  | 5.20E-01 | 6.44E-01 |
| BEX2    | 0.2509  | 9.85E-07 | 1.12E-05 |
| BEX4    | 0.0744  | 1.52E-01 | 2.57E-01 |
| BEX5    | 0.1079  | 3.78E-02 | 8.63E-02 |
| BEYLA   | 0.0795  | 1.27E-01 | 2.23E-01 |
| BFAR    | -0.0728 | 1.62E-01 | 2.69E-01 |
| BFSP1   | 0.2947  | 7.17E-09 | 1.37E-07 |
| BFSP2   | 0.2554  | 6.16E-07 | 7.34E-06 |
| BGLAP   | 0.2263  | 1.07E-05 | 8.96E-05 |
| BGN     | -0.1025 | 4.86E-02 | 1.05E-01 |
| BHLHA15 | -0.0618 | 2.35E-01 | 3.58E-01 |
| BHLHB9  | 0.1027  | 4.80E-02 | 1.04E-01 |
| BHLHE22 | -0.0579 | 2.66E-01 | 3.93E-01 |
| BHLHE40 | -0.1420 | 6.13E-03 | 1.95E-02 |
| BHLHE41 | 0.0187  | 7.19E-01 | 8.09E-01 |
| BHMT2   | -0.1356 | 8.94E-03 | 2.67E-02 |
| BHMT    | -0.1284 | 1.33E-02 | 3.70E-02 |
| BICC1   | 0.0046  | 9.30E-01 | 9.56E-01 |
| BICD1   | 0.1264  | 1.49E-02 | 4.04E-02 |
| BICD2   | 0.1486  | 4.11E-03 | 1.41E-02 |
| BID     | 0.0423  | 4.16E-01 | 5.49E-01 |
| BIK     | 0.0482  | 3.55E-01 | 4.87E-01 |
| BIN1    | -0.0691 | 1.84E-01 | 2.97E-01 |
| BIN2    | -0.0790 | 1.29E-01 | 2.26E-01 |
| BIN3    | -0.0020 | 9.70E-01 | 9.81E-01 |
| BIRC2   | 0.0830  | 1.11E-01 | 2.01E-01 |
| BIRC3   | 0.1663  | 1.30E-03 | 5.37E-03 |
| BIRC5   | 0.4183  | 3.81E-17 | 4.22E-15 |
| BIRC6   | -0.0330 | 5.27E-01 | 6.49E-01 |
| BIRC7   | 0.0685  | 1.88E-01 | 3.01E-01 |
| BIRC8   | 0.0929  | 7.39E-02 | 1.46E-01 |
| BIVM    | 0.0531  | 3.08E-01 | 4.38E-01 |

|         |         |          |          |
|---------|---------|----------|----------|
| BLCAP   | -0.2199 | 1.93E-05 | 1.50E-04 |
| BLID    | -0.0916 | 7.79E-02 | 1.53E-01 |
| BLK     | -0.0467 | 3.70E-01 | 5.03E-01 |
| BLMH    | 0.2046  | 7.19E-05 | 4.61E-04 |
| BLM     | 0.4175  | 4.42E-17 | 4.84E-15 |
| BLNK    | -0.0006 | 9.90E-01 | 9.94E-01 |
| BLOC1S1 | -0.0226 | 6.65E-01 | 7.65E-01 |
| BLOC1S2 | -0.1276 | 1.39E-02 | 3.84E-02 |
| BLOC1S3 | 0.1914  | 2.08E-04 | 1.14E-03 |
| BLVRA   | 0.1021  | 4.94E-02 | 1.07E-01 |
| BLVRB   | -0.1321 | 1.08E-02 | 3.12E-02 |
| BLZF1   | 0.3586  | 1.06E-12 | 4.72E-11 |
| BMF     | 0.1948  | 1.59E-04 | 9.07E-04 |
| BMI1    | -0.0209 | 6.89E-01 | 7.84E-01 |
| BMP10   | -0.1950 | 1.57E-04 | 8.96E-04 |
| BMP15   | -0.0245 | 6.38E-01 | 7.45E-01 |
| BMP1    | -0.2040 | 7.57E-05 | 4.82E-04 |
| BMP2K   | -0.1028 | 4.78E-02 | 1.04E-01 |
| BMP2    | -0.0072 | 8.90E-01 | 9.30E-01 |
| BMP3    | -0.0330 | 5.26E-01 | 6.49E-01 |
| BMP4    | -0.0160 | 7.58E-01 | 8.38E-01 |
| BMP5    | -0.1428 | 5.87E-03 | 1.88E-02 |
| BMP6    | -0.0673 | 1.96E-01 | 3.11E-01 |
| BMP7    | 0.1283  | 1.34E-02 | 3.72E-02 |
| BMP8A   | 0.1961  | 1.44E-04 | 8.34E-04 |
| BMP8B   | 0.2311  | 6.89E-06 | 6.10E-05 |
| BMPER   | -0.2045 | 7.27E-05 | 4.65E-04 |
| BMPR1A  | 0.0902  | 8.28E-02 | 1.60E-01 |
| BMPR1B  | -0.0619 | 2.34E-01 | 3.57E-01 |
| BMPR2   | -0.0983 | 5.85E-02 | 1.22E-01 |
| BMS1P4  | 0.0884  | 8.91E-02 | 1.70E-01 |
| BMS1P5  | 0.1530  | 3.14E-03 | 1.12E-02 |
| BMS1    | 0.1636  | 1.56E-03 | 6.26E-03 |
| BMX     | -0.2394 | 3.12E-06 | 3.07E-05 |
| BNC1    | -0.0618 | 2.35E-01 | 3.59E-01 |
| BNC2    | -0.1024 | 4.88E-02 | 1.06E-01 |
| BNIP1   | 0.0305  | 5.58E-01 | 6.77E-01 |
| BNIP2   | -0.0721 | 1.66E-01 | 2.74E-01 |
| BNIP3L  | -0.0553 | 2.88E-01 | 4.17E-01 |
| BNIP3   | -0.1773 | 6.03E-04 | 2.78E-03 |
| BNIPL   | 0.1965  | 1.39E-04 | 8.07E-04 |
| BOC     | -0.1652 | 1.40E-03 | 5.71E-03 |
| BOD1L   | 0.0083  | 8.73E-01 | 9.18E-01 |
| BOD1    | 0.1673  | 1.22E-03 | 5.08E-03 |

|        |         |          |          |
|--------|---------|----------|----------|
| BOK    | -0.3283 | 9.02E-11 | 2.66E-09 |
| BOLA1  | 0.3555  | 1.70E-12 | 7.24E-11 |
| BOLA2  | 0.1705  | 9.76E-04 | 4.22E-03 |
| BOLA3  | 0.1028  | 4.78E-02 | 1.04E-01 |
| BOLL   | 0.1766  | 6.31E-04 | 2.90E-03 |
| BOP1   | 0.0012  | 9.81E-01 | 9.88E-01 |
| BPESC1 | 0.1299  | 1.22E-02 | 3.45E-02 |
| BPGM   | -0.0385 | 4.59E-01 | 5.90E-01 |
| BPHL   | -0.1855 | 3.28E-04 | 1.68E-03 |
| BPIL1  | 0.0740  | 1.55E-01 | 2.60E-01 |
| BPIL2  | 0.1594  | 2.07E-03 | 7.93E-03 |
| BPIL3  | 0.0817  | 1.16E-01 | 2.09E-01 |
| BPI    | -0.0538 | 3.01E-01 | 4.30E-01 |
| BPNT1  | 0.1015  | 5.07E-02 | 1.09E-01 |
| BPTF   | 0.1792  | 5.23E-04 | 2.47E-03 |
| BPY2   | -0.0025 | 9.62E-01 | 9.76E-01 |
| BRAF   | 0.0938  | 7.12E-02 | 1.42E-01 |
| BRAP   | 0.1302  | 1.21E-02 | 3.42E-02 |
| BRCA1  | 0.4267  | 7.54E-18 | 1.04E-15 |
| BRCA2  | 0.2056  | 6.62E-05 | 4.29E-04 |
| BRCC3  | 0.1557  | 2.63E-03 | 9.68E-03 |
| BRD1   | 0.1264  | 1.49E-02 | 4.04E-02 |
| BRD2   | 0.0894  | 8.56E-02 | 1.64E-01 |
| BRD3   | 0.1625  | 1.68E-03 | 6.66E-03 |
| BRD4   | 0.0831  | 1.10E-01 | 2.01E-01 |
| BRD7P3 | 0.0004  | 9.93E-01 | 9.96E-01 |
| BRD7   | -0.0360 | 4.89E-01 | 6.17E-01 |
| BRD8   | 0.2802  | 4.06E-08 | 6.47E-07 |
| BRD9   | 0.2280  | 9.19E-06 | 7.80E-05 |
| BRDT   | 0.1309  | 1.16E-02 | 3.31E-02 |
| BREA2  | 0.1672  | 1.23E-03 | 5.11E-03 |
| BRE    | -0.0606 | 2.45E-01 | 3.69E-01 |
| BRF1   | 0.0142  | 7.86E-01 | 8.58E-01 |
| BRF2   | 0.2200  | 1.91E-05 | 1.48E-04 |
| BRI3BP | 0.1301  | 1.21E-02 | 3.42E-02 |
| BRI3   | -0.0790 | 1.29E-01 | 2.26E-01 |
| BRIP1  | 0.2159  | 2.75E-05 | 2.03E-04 |
| BRIX1  | 0.3690  | 2.07E-13 | 1.04E-11 |
| BRMS1L | -0.0384 | 4.61E-01 | 5.91E-01 |
| BRMS1  | 0.1010  | 5.19E-02 | 1.11E-01 |
| BRP44L | -0.2166 | 2.58E-05 | 1.93E-04 |
| BRP44  | 0.3521  | 2.89E-12 | 1.17E-10 |
| BRPF1  | 0.2625  | 2.90E-07 | 3.80E-06 |
| BRPF3  | 0.1239  | 1.70E-02 | 4.50E-02 |

|        |         |          |          |
|--------|---------|----------|----------|
| BRS3   | 0.0999  | 5.46E-02 | 1.15E-01 |
| BRSK1  | 0.1675  | 1.20E-03 | 5.03E-03 |
| BRSK2  | 0.0405  | 4.37E-01 | 5.68E-01 |
| BRWD1  | -0.0402 | 4.40E-01 | 5.71E-01 |
| BRWD3  | 0.0502  | 3.35E-01 | 4.67E-01 |
| BSCL2  | 0.0550  | 2.91E-01 | 4.20E-01 |
| BSDC1  | -0.2461 | 1.61E-06 | 1.72E-05 |
| BSG    | 0.0137  | 7.93E-01 | 8.63E-01 |
| BSND   | 0.1523  | 3.28E-03 | 1.16E-02 |
| BSN    | 0.0533  | 3.06E-01 | 4.36E-01 |
| BSPRY  | 0.1511  | 3.53E-03 | 1.24E-02 |
| BST1   | 0.0077  | 8.82E-01 | 9.25E-01 |
| BST2   | -0.1166 | 2.48E-02 | 6.10E-02 |
| BSX    | -0.0176 | 7.35E-01 | 8.21E-01 |
| BTAF1  | 0.0765  | 1.42E-01 | 2.43E-01 |
| BTBD10 | 0.0906  | 8.15E-02 | 1.58E-01 |
| BTBD11 | 0.0333  | 5.23E-01 | 6.47E-01 |
| BTBD12 | 0.1395  | 7.11E-03 | 2.20E-02 |
| BTBD16 | -0.1329 | 1.04E-02 | 3.01E-02 |
| BTBD17 | 0.0681  | 1.91E-01 | 3.05E-01 |
| BTBD18 | 0.0656  | 2.07E-01 | 3.26E-01 |
| BTBD19 | -0.1272 | 1.42E-02 | 3.90E-02 |
| BTBD1  | -0.1922 | 1.96E-04 | 1.08E-03 |
| BTBD2  | 0.0100  | 8.48E-01 | 9.01E-01 |
| BTBD3  | 0.1344  | 9.56E-03 | 2.82E-02 |
| BTBD6  | -0.0185 | 7.22E-01 | 8.12E-01 |
| BTBD7  | 0.0819  | 1.15E-01 | 2.08E-01 |
| BTBD8  | 0.1335  | 1.00E-02 | 2.93E-02 |
| BTBD9  | 0.0609  | 2.42E-01 | 3.66E-01 |
| BTC    | 0.0768  | 1.40E-01 | 2.41E-01 |
| BTD    | -0.3288 | 8.44E-11 | 2.51E-09 |
| BTF3L1 | 0.0309  | 5.53E-01 | 6.72E-01 |
| BTF3L4 | 0.1888  | 2.55E-04 | 1.36E-03 |
| BTF3   | 0.0391  | 4.52E-01 | 5.83E-01 |
| BTG1   | 0.0450  | 3.87E-01 | 5.20E-01 |
| BTG2   | 0.0297  | 5.68E-01 | 6.86E-01 |
| BTG3   | 0.2389  | 3.25E-06 | 3.19E-05 |
| BTG4   | 0.0514  | 3.23E-01 | 4.54E-01 |
| BTK    | -0.0776 | 1.36E-01 | 2.35E-01 |
| BTLA   | -0.0248 | 6.34E-01 | 7.41E-01 |
| BTN1A1 | 0.0719  | 1.67E-01 | 2.75E-01 |
| BTN2A1 | 0.1761  | 6.57E-04 | 3.00E-03 |
| BTN2A2 | 0.0864  | 9.65E-02 | 1.81E-01 |
| BTN2A3 | 0.0952  | 6.71E-02 | 1.36E-01 |

|           |         |          |          |
|-----------|---------|----------|----------|
| BTN3A1    | -0.0376 | 4.70E-01 | 5.99E-01 |
| BTN3A2    | -0.0793 | 1.27E-01 | 2.24E-01 |
| BTN3A3    | -0.0689 | 1.85E-01 | 2.98E-01 |
| BTNL2     | 0.1012  | 5.15E-02 | 1.10E-01 |
| BTNL3     | 0.0349  | 5.03E-01 | 6.28E-01 |
| BTNL8     | 0.2100  | 4.56E-05 | 3.12E-04 |
| BTNL9     | -0.2202 | 1.88E-05 | 1.46E-04 |
| BTRC      | 0.0285  | 5.84E-01 | 7.00E-01 |
| BUB1B     | 0.4095  | 1.98E-16 | 1.86E-14 |
| BUB1      | 0.3988  | 1.36E-15 | 1.06E-13 |
| BUB3      | 0.2938  | 8.00E-09 | 1.52E-07 |
| BUD13     | 0.3636  | 4.84E-13 | 2.29E-11 |
| BUD31     | 0.0148  | 7.76E-01 | 8.50E-01 |
| BVES      | -0.0241 | 6.43E-01 | 7.48E-01 |
| BYSL      | 0.1189  | 2.20E-02 | 5.55E-02 |
| BZRAP1    | 0.1897  | 2.39E-04 | 1.28E-03 |
| BZW1      | -0.1371 | 8.20E-03 | 2.48E-02 |
| BZW2      | 0.1082  | 3.73E-02 | 8.53E-02 |
| C10orf105 | -0.0264 | 6.12E-01 | 7.23E-01 |
| C10orf107 | -0.1101 | 3.40E-02 | 7.92E-02 |
| C10orf108 | -0.0384 | 4.61E-01 | 5.91E-01 |
| C10orf10  | -0.0931 | 7.32E-02 | 1.45E-01 |
| C10orf110 | 0.0777  | 1.35E-01 | 2.34E-01 |
| C10orf111 | 0.1276  | 1.39E-02 | 3.83E-02 |
| C10orf113 | 0.0676  | 1.94E-01 | 3.10E-01 |
| C10orf114 | -0.0140 | 7.88E-01 | 8.59E-01 |
| C10orf116 | -0.0510 | 3.27E-01 | 4.58E-01 |
| C10orf118 | -0.0542 | 2.98E-01 | 4.27E-01 |
| C10orf119 | 0.1481  | 4.26E-03 | 1.45E-02 |
| C10orf11  | -0.1070 | 3.94E-02 | 8.91E-02 |
| C10orf120 | 0.0784  | 1.32E-01 | 2.30E-01 |
| C10orf122 | -0.0354 | 4.97E-01 | 6.23E-01 |
| C10orf125 | -0.2419 | 2.44E-06 | 2.47E-05 |
| C10orf128 | -0.2249 | 1.23E-05 | 1.00E-04 |
| C10orf129 | 0.0275  | 5.97E-01 | 7.11E-01 |
| C10orf12  | -0.0874 | 9.28E-02 | 1.75E-01 |
| C10orf131 | -0.0232 | 6.56E-01 | 7.58E-01 |
| C10orf137 | 0.2479  | 1.34E-06 | 1.47E-05 |
| C10orf140 | 0.0872  | 9.37E-02 | 1.77E-01 |
| C10orf18  | 0.1560  | 2.59E-03 | 9.54E-03 |
| C10orf25  | -0.1338 | 9.88E-03 | 2.90E-02 |
| C10orf26  | -0.2816 | 3.43E-08 | 5.56E-07 |
| C10orf27  | -0.0941 | 7.02E-02 | 1.41E-01 |
| C10orf28  | 0.0525  | 3.13E-01 | 4.43E-01 |

|          |         |          |          |
|----------|---------|----------|----------|
| C10orf2  | 0.1262  | 1.50E-02 | 4.07E-02 |
| C10orf32 | -0.2254 | 1.17E-05 | 9.63E-05 |
| C10orf35 | 0.2130  | 3.53E-05 | 2.52E-04 |
| C10orf41 | -0.1017 | 5.04E-02 | 1.08E-01 |
| C10orf46 | -0.0205 | 6.94E-01 | 7.89E-01 |
| C10orf47 | -0.0607 | 2.44E-01 | 3.68E-01 |
| C10orf4  | 0.1011  | 5.17E-02 | 1.10E-01 |
| C10orf50 | 0.0467  | 3.69E-01 | 5.02E-01 |
| C10orf53 | -0.0108 | 8.36E-01 | 8.92E-01 |
| C10orf54 | -0.0663 | 2.02E-01 | 3.19E-01 |
| C10orf55 | -0.0073 | 8.88E-01 | 9.28E-01 |
| C10orf57 | -0.2124 | 3.71E-05 | 2.63E-04 |
| C10orf58 | -0.1357 | 8.89E-03 | 2.66E-02 |
| C10orf62 | 0.1027  | 4.81E-02 | 1.04E-01 |
| C10orf67 | 0.0180  | 7.29E-01 | 8.16E-01 |
| C10orf68 | 0.2829  | 2.94E-08 | 4.86E-07 |
| C10orf71 | -0.0744 | 1.53E-01 | 2.57E-01 |
| C10orf72 | -0.1689 | 1.09E-03 | 4.64E-03 |
| C10orf75 | 0.0795  | 1.27E-01 | 2.23E-01 |
| C10orf76 | -0.1234 | 1.74E-02 | 4.58E-02 |
| C10orf78 | 0.3880  | 8.91E-15 | 5.84E-13 |
| C10orf79 | 0.0938  | 7.10E-02 | 1.42E-01 |
| C10orf81 | 0.2472  | 1.43E-06 | 1.55E-05 |
| C10orf82 | 0.0760  | 1.44E-01 | 2.46E-01 |
| C10orf84 | -0.0338 | 5.16E-01 | 6.41E-01 |
| C10orf88 | 0.2308  | 7.11E-06 | 6.25E-05 |
| C10orf90 | -0.0658 | 2.06E-01 | 3.24E-01 |
| C10orf91 | 0.2443  | 1.92E-06 | 2.02E-05 |
| C10orf93 | -0.0669 | 1.99E-01 | 3.15E-01 |
| C10orf95 | 0.1023  | 4.91E-02 | 1.06E-01 |
| C10orf96 | 0.0635  | 2.22E-01 | 3.43E-01 |
| C10orf99 | 0.0718  | 1.68E-01 | 2.76E-01 |
| C11orf10 | 0.1576  | 2.34E-03 | 8.76E-03 |
| C11orf16 | 0.0760  | 1.44E-01 | 2.46E-01 |
| C11orf17 | 0.1740  | 7.63E-04 | 3.41E-03 |
| C11orf1  | -0.2278 | 9.38E-06 | 7.95E-05 |
| C11orf20 | -0.0467 | 3.70E-01 | 5.03E-01 |
| C11orf21 | -0.0706 | 1.75E-01 | 2.85E-01 |
| C11orf24 | -0.1130 | 2.95E-02 | 7.05E-02 |
| C11orf2  | -0.1639 | 1.54E-03 | 6.18E-03 |
| C11orf30 | 0.0631  | 2.26E-01 | 3.47E-01 |
| C11orf31 | 0.1065  | 4.04E-02 | 9.09E-02 |
| C11orf34 | -0.0767 | 1.41E-01 | 2.41E-01 |
| C11orf35 | -0.0765 | 1.41E-01 | 2.42E-01 |

|          |         |          |          |
|----------|---------|----------|----------|
| C11orf36 | 0.0344  | 5.09E-01 | 6.34E-01 |
| C11orf41 | 0.1316  | 1.11E-02 | 3.19E-02 |
| C11orf42 | 0.0589  | 2.58E-01 | 3.84E-01 |
| C11orf45 | 0.0642  | 2.17E-01 | 3.38E-01 |
| C11orf46 | 0.0607  | 2.43E-01 | 3.68E-01 |
| C11orf48 | 0.1438  | 5.51E-03 | 1.79E-02 |
| C11orf49 | 0.0597  | 2.51E-01 | 3.76E-01 |
| C11orf51 | -0.0408 | 4.34E-01 | 5.66E-01 |
| C11orf52 | -0.0968 | 6.27E-02 | 1.29E-01 |
| C11orf53 | 0.2232  | 1.43E-05 | 1.15E-04 |
| C11orf54 | -0.2457 | 1.67E-06 | 1.78E-05 |
| C11orf57 | 0.0688  | 1.86E-01 | 2.99E-01 |
| C11orf58 | -0.0567 | 2.76E-01 | 4.04E-01 |
| C11orf59 | -0.0059 | 9.09E-01 | 9.43E-01 |
| C11orf61 | 0.3152  | 5.29E-10 | 1.33E-08 |
| C11orf63 | -0.0632 | 2.25E-01 | 3.46E-01 |
| C11orf65 | -0.0956 | 6.58E-02 | 1.34E-01 |
| C11orf66 | -0.2638 | 2.53E-07 | 3.36E-06 |
| C11orf67 | 0.0366  | 4.83E-01 | 6.11E-01 |
| C11orf68 | 0.0047  | 9.27E-01 | 9.54E-01 |
| C11orf70 | 0.0952  | 6.69E-02 | 1.35E-01 |
| C11orf71 | -0.2494 | 1.14E-06 | 1.28E-05 |
| C11orf73 | 0.1124  | 3.05E-02 | 7.24E-02 |
| C11orf74 | 0.1022  | 4.92E-02 | 1.06E-01 |
| C11orf75 | 0.0851  | 1.02E-01 | 1.88E-01 |
| C11orf80 | 0.1911  | 2.13E-04 | 1.16E-03 |
| C11orf82 | 0.3207  | 2.55E-10 | 6.96E-09 |
| C11orf83 | 0.0387  | 4.58E-01 | 5.88E-01 |
| C11orf84 | 0.3235  | 1.74E-10 | 4.89E-09 |
| C11orf85 | 0.0672  | 1.97E-01 | 3.12E-01 |
| C11orf86 | -0.0510 | 3.27E-01 | 4.57E-01 |
| C11orf87 | -0.0978 | 5.98E-02 | 1.24E-01 |
| C11orf88 | 0.0977  | 6.00E-02 | 1.24E-01 |
| C11orf90 | 0.0951  | 6.72E-02 | 1.36E-01 |
| C11orf92 | 0.1898  | 2.35E-04 | 1.27E-03 |
| C11orf93 | 0.3542  | 2.10E-12 | 8.76E-11 |
| C11orf94 | 0.0420  | 4.19E-01 | 5.52E-01 |
| C11orf95 | -0.0879 | 9.09E-02 | 1.72E-01 |
| C11orf9  | 0.2299  | 7.68E-06 | 6.66E-05 |
| C12orf10 | -0.0429 | 4.10E-01 | 5.43E-01 |
| C12orf11 | 0.1235  | 1.74E-02 | 4.57E-02 |
| C12orf12 | 0.0500  | 3.37E-01 | 4.68E-01 |
| C12orf23 | -0.0437 | 4.01E-01 | 5.34E-01 |
| C12orf24 | -0.0336 | 5.19E-01 | 6.43E-01 |



|          |         |          |          |
|----------|---------|----------|----------|
| C12orf26 | 0.1647  | 1.45E-03 | 5.88E-03 |
| C12orf27 | 0.2856  | 2.15E-08 | 3.69E-07 |
| C12orf29 | 0.0444  | 3.94E-01 | 5.27E-01 |
| C12orf32 | 0.3534  | 2.34E-12 | 9.70E-11 |
| C12orf34 | 0.2240  | 1.33E-05 | 1.08E-04 |
| C12orf35 | -0.1136 | 2.87E-02 | 6.90E-02 |
| C12orf36 | 0.0071  | 8.91E-01 | 9.31E-01 |
| C12orf39 | 0.0255  | 6.24E-01 | 7.33E-01 |
| C12orf40 | -0.0583 | 2.63E-01 | 3.89E-01 |
| C12orf41 | 0.2772  | 5.73E-08 | 8.82E-07 |
| C12orf42 | 0.0446  | 3.91E-01 | 5.24E-01 |
| C12orf43 | 0.0517  | 3.21E-01 | 4.51E-01 |
| C12orf44 | 0.0120  | 8.17E-01 | 8.80E-01 |
| C12orf45 | 0.0499  | 3.38E-01 | 4.69E-01 |
| C12orf47 | 0.1840  | 3.67E-04 | 1.85E-03 |
| C12orf48 | 0.3699  | 1.78E-13 | 9.14E-12 |
| C12orf49 | 0.1227  | 1.81E-02 | 4.73E-02 |
| C12orf4  | 0.2791  | 4.58E-08 | 7.25E-07 |
| C12orf50 | 0.0142  | 7.85E-01 | 8.57E-01 |
| C12orf51 | 0.0425  | 4.14E-01 | 5.47E-01 |
| C12orf52 | -0.0784 | 1.32E-01 | 2.29E-01 |
| C12orf53 | 0.1449  | 5.16E-03 | 1.69E-02 |
| C12orf54 | 0.0558  | 2.84E-01 | 4.13E-01 |
| C12orf56 | 0.1004  | 5.33E-02 | 1.13E-01 |
| C12orf57 | 0.1460  | 4.83E-03 | 1.60E-02 |
| C12orf59 | 0.0182  | 7.27E-01 | 8.14E-01 |
| C12orf5  | -0.0787 | 1.30E-01 | 2.28E-01 |
| C12orf60 | 0.0520  | 3.18E-01 | 4.48E-01 |
| C12orf61 | -0.1508 | 3.59E-03 | 1.26E-02 |
| C12orf62 | -0.0551 | 2.90E-01 | 4.19E-01 |
| C12orf63 | -0.0078 | 8.80E-01 | 9.23E-01 |
| C12orf65 | 0.2153  | 2.90E-05 | 2.13E-04 |
| C12orf66 | -0.2097 | 4.68E-05 | 3.20E-04 |
| C12orf68 | -0.1982 | 1.22E-04 | 7.23E-04 |
| C12orf69 | -0.1133 | 2.91E-02 | 6.98E-02 |
| C12orf70 | 0.1740  | 7.62E-04 | 3.41E-03 |
| C12orf71 | 0.0183  | 7.26E-01 | 8.14E-01 |
| C12orf72 | -0.2481 | 1.31E-06 | 1.44E-05 |
| C12orf73 | 0.1265  | 1.48E-02 | 4.02E-02 |
| C12orf74 | 0.0316  | 5.45E-01 | 6.65E-01 |
| C12orf75 | 0.1356  | 8.92E-03 | 2.67E-02 |
| C12orf76 | 0.1461  | 4.80E-03 | 1.60E-02 |
| C12orf77 | -0.0049 | 9.25E-01 | 9.53E-01 |
| C13orf15 | -0.1815 | 4.43E-04 | 2.15E-03 |

|            |         |          |          |
|------------|---------|----------|----------|
| C13orf16   | -0.0126 | 8.09E-01 | 8.74E-01 |
| C13orf18   | 0.0577  | 2.67E-01 | 3.95E-01 |
| C13orf1    | -0.1843 | 3.58E-04 | 1.81E-03 |
| C13orf23   | 0.2682  | 1.56E-07 | 2.17E-06 |
| C13orf26   | -0.1337 | 9.93E-03 | 2.91E-02 |
| C13orf27   | 0.0745  | 1.52E-01 | 2.56E-01 |
| C13orf29   | 0.0487  | 3.50E-01 | 4.82E-01 |
| C13orf30   | 0.0823  | 1.14E-01 | 2.06E-01 |
| C13orf31   | -0.0512 | 3.26E-01 | 4.56E-01 |
| C13orf33   | -0.0777 | 1.35E-01 | 2.34E-01 |
| C13orf34   | 0.3503  | 3.76E-12 | 1.50E-10 |
| C13orf35   | 0.2841  | 2.55E-08 | 4.28E-07 |
| C13orf36   | -0.0514 | 3.23E-01 | 4.54E-01 |
| C13orf37   | 0.3221  | 2.10E-10 | 5.81E-09 |
| C13orf38   | 0.0298  | 5.67E-01 | 6.84E-01 |
| C13orf39   | -0.0524 | 3.14E-01 | 4.44E-01 |
| C14orf101  | 0.1497  | 3.85E-03 | 1.33E-02 |
| C14orf102  | -0.1229 | 1.79E-02 | 4.70E-02 |
| C14orf104  | -0.1248 | 1.62E-02 | 4.33E-02 |
| C14orf105  | 0.0385  | 4.60E-01 | 5.90E-01 |
| C14orf106  | 0.1657  | 1.36E-03 | 5.57E-03 |
| C14orf109  | 0.1853  | 3.33E-04 | 1.70E-03 |
| C14orf115  | 0.1029  | 4.77E-02 | 1.04E-01 |
| C14orf118  | 0.0148  | 7.76E-01 | 8.50E-01 |
| C14orf119  | 0.0999  | 5.44E-02 | 1.15E-01 |
| C14orf126  | -0.1325 | 1.06E-02 | 3.07E-02 |
| C14orf128  | -0.0274 | 5.99E-01 | 7.12E-01 |
| C14orf129  | 0.0043  | 9.35E-01 | 9.59E-01 |
| C14orf132  | 0.1552  | 2.72E-03 | 9.97E-03 |
| C14orf135  | 0.0415  | 4.25E-01 | 5.58E-01 |
| C14orf138  | 0.1237  | 1.71E-02 | 4.53E-02 |
| C14orf139  | 0.0848  | 1.03E-01 | 1.90E-01 |
| C14orf142  | 0.0608  | 2.42E-01 | 3.67E-01 |
| C14orf143  | 0.0917  | 7.78E-02 | 1.52E-01 |
| C14orf145  | 0.1261  | 1.51E-02 | 4.08E-02 |
| C14orf147  | -0.0688 | 1.86E-01 | 2.99E-01 |
| C14orf148  | 0.1911  | 2.14E-04 | 1.16E-03 |
| C14orf149  | -0.0409 | 4.32E-01 | 5.65E-01 |
| C14orf153  | -0.0348 | 5.04E-01 | 6.29E-01 |
| C14orf156  | -0.0604 | 2.45E-01 | 3.70E-01 |
| C14orf159  | -0.3037 | 2.35E-09 | 5.08E-08 |
| C14orf162  | -0.0388 | 4.56E-01 | 5.87E-01 |
| C14orf165  | -0.0075 | 8.85E-01 | 9.26E-01 |
| C14orf166B | 0.1484  | 4.17E-03 | 1.42E-02 |

|           |         |          |          |
|-----------|---------|----------|----------|
| C14orf166 | 0.0221  | 6.71E-01 | 7.70E-01 |
| C14orf167 | -0.2234 | 1.40E-05 | 1.13E-04 |
| C14orf169 | 0.0977  | 6.01E-02 | 1.24E-01 |
| C14orf174 | 0.0791  | 1.28E-01 | 2.25E-01 |
| C14orf176 | 0.0535  | 3.04E-01 | 4.34E-01 |
| C14orf178 | -0.1393 | 7.20E-03 | 2.23E-02 |
| C14orf179 | -0.1385 | 7.54E-03 | 2.31E-02 |
| C14orf180 | -0.0389 | 4.55E-01 | 5.85E-01 |
| C14orf181 | 0.1519  | 3.37E-03 | 1.19E-02 |
| C14orf182 | -0.0778 | 1.35E-01 | 2.34E-01 |
| C14orf183 | 0.0562  | 2.80E-01 | 4.09E-01 |
| C14orf184 | 0.0059  | 9.10E-01 | 9.43E-01 |
| C14orf19  | 0.1832  | 3.91E-04 | 1.95E-03 |
| C14orf1   | -0.2301 | 7.54E-06 | 6.56E-05 |
| C14orf21  | -0.1280 | 1.36E-02 | 3.77E-02 |
| C14orf23  | 0.0748  | 1.50E-01 | 2.54E-01 |
| C14orf28  | -0.2328 | 5.85E-06 | 5.30E-05 |
| C14orf2   | -0.0774 | 1.37E-01 | 2.36E-01 |
| C14orf33  | 0.1301  | 1.21E-02 | 3.42E-02 |
| C14orf34  | 0.0557  | 2.85E-01 | 4.13E-01 |
| C14orf37  | -0.0782 | 1.33E-01 | 2.31E-01 |
| C14orf39  | 0.1366  | 8.44E-03 | 2.54E-02 |
| C14orf43  | 0.0498  | 3.39E-01 | 4.70E-01 |
| C14orf45  | -0.0641 | 2.18E-01 | 3.38E-01 |
| C14orf48  | 0.0410  | 4.31E-01 | 5.64E-01 |
| C14orf49  | -0.0541 | 2.98E-01 | 4.28E-01 |
| C14orf4   | -0.1350 | 9.21E-03 | 2.74E-02 |
| C14orf50  | 0.0022  | 9.66E-01 | 9.79E-01 |
| C14orf53  | -0.2177 | 2.35E-05 | 1.77E-04 |
| C14orf64  | 0.0127  | 8.08E-01 | 8.73E-01 |
| C14orf68  | -0.2770 | 5.80E-08 | 8.91E-07 |
| C14orf70  | 0.1501  | 3.77E-03 | 1.31E-02 |
| C14orf72  | -0.0140 | 7.88E-01 | 8.59E-01 |
| C14orf73  | 0.0050  | 9.24E-01 | 9.52E-01 |
| C14orf79  | 0.0151  | 7.72E-01 | 8.46E-01 |
| C14orf80  | 0.1320  | 1.09E-02 | 3.13E-02 |
| C14orf86  | 0.0749  | 1.50E-01 | 2.54E-01 |
| C14orf93  | 0.1502  | 3.73E-03 | 1.30E-02 |
| C15orf17  | 0.1267  | 1.46E-02 | 3.98E-02 |
| C15orf21  | 0.2025  | 8.54E-05 | 5.33E-04 |
| C15orf23  | 0.2815  | 3.49E-08 | 5.64E-07 |
| C15orf24  | -0.2093 | 4.83E-05 | 3.29E-04 |
| C15orf26  | 0.0180  | 7.30E-01 | 8.17E-01 |
| C15orf27  | 0.0923  | 7.57E-02 | 1.49E-01 |

|          |         |          |          |
|----------|---------|----------|----------|
| C15orf28 | 0.0939  | 7.07E-02 | 1.41E-01 |
| C15orf29 | 0.1489  | 4.04E-03 | 1.39E-02 |
| C15orf2  | -0.0850 | 1.02E-01 | 1.89E-01 |
| C15orf32 | -0.0985 | 5.80E-02 | 1.21E-01 |
| C15orf33 | -0.1138 | 2.84E-02 | 6.84E-02 |
| C15orf34 | -0.0556 | 2.85E-01 | 4.14E-01 |
| C15orf37 | -0.2423 | 2.34E-06 | 2.39E-05 |
| C15orf38 | 0.0624  | 2.30E-01 | 3.53E-01 |
| C15orf39 | 0.2218  | 1.62E-05 | 1.28E-04 |
| C15orf40 | 0.0683  | 1.89E-01 | 3.03E-01 |
| C15orf41 | 0.1189  | 2.20E-02 | 5.54E-02 |
| C15orf42 | 0.4068  | 3.20E-16 | 2.89E-14 |
| C15orf43 | -0.1889 | 2.53E-04 | 1.35E-03 |
| C15orf44 | -0.0734 | 1.58E-01 | 2.64E-01 |
| C15orf48 | 0.2063  | 6.26E-05 | 4.09E-04 |
| C15orf50 | 0.0784  | 1.32E-01 | 2.30E-01 |
| C15orf51 | 0.0492  | 3.44E-01 | 4.76E-01 |
| C15orf52 | 0.0507  | 3.30E-01 | 4.61E-01 |
| C15orf53 | 0.0454  | 3.83E-01 | 5.17E-01 |
| C15orf54 | -0.0353 | 4.98E-01 | 6.24E-01 |
| C15orf55 | 0.0888  | 8.78E-02 | 1.67E-01 |
| C15orf56 | 0.2406  | 2.77E-06 | 2.77E-05 |
| C15orf57 | -0.0746 | 1.51E-01 | 2.55E-01 |
| C15orf58 | -0.1007 | 5.26E-02 | 1.12E-01 |
| C15orf59 | -0.0071 | 8.91E-01 | 9.30E-01 |
| C15orf5  | -0.0520 | 3.18E-01 | 4.48E-01 |
| C15orf60 | 0.1196  | 2.12E-02 | 5.38E-02 |
| C15orf61 | -0.0045 | 9.31E-01 | 9.57E-01 |
| C15orf62 | 0.0541  | 2.98E-01 | 4.28E-01 |
| C15orf63 | 0.0256  | 6.23E-01 | 7.32E-01 |
| C16orf11 | 0.1509  | 3.58E-03 | 1.25E-02 |
| C16orf13 | 0.0442  | 3.96E-01 | 5.28E-01 |
| C16orf3  | 0.1192  | 2.16E-02 | 5.47E-02 |
| C16orf42 | -0.0101 | 8.47E-01 | 9.00E-01 |
| C16orf45 | -0.1880 | 2.72E-04 | 1.43E-03 |
| C16orf46 | -0.2325 | 6.05E-06 | 5.45E-05 |
| C16orf48 | 0.0147  | 7.78E-01 | 8.52E-01 |
| C16orf52 | -0.0358 | 4.92E-01 | 6.19E-01 |
| C16orf53 | 0.1754  | 6.89E-04 | 3.13E-03 |
| C16orf54 | -0.1019 | 4.98E-02 | 1.07E-01 |
| C16orf55 | 0.0470  | 3.67E-01 | 5.00E-01 |
| C16orf57 | -0.0814 | 1.18E-01 | 2.11E-01 |
| C16orf58 | -0.1376 | 7.93E-03 | 2.42E-02 |
| C16orf59 | 0.4001  | 1.08E-15 | 8.62E-14 |

|           |         |          |          |
|-----------|---------|----------|----------|
| C16orf5   | -0.1169 | 2.43E-02 | 6.02E-02 |
| C16orf61  | -0.0935 | 7.21E-02 | 1.44E-01 |
| C16orf62  | -0.1739 | 7.69E-04 | 3.43E-03 |
| C16orf63  | 0.0853  | 1.01E-01 | 1.87E-01 |
| C16orf68  | 0.0075  | 8.85E-01 | 9.26E-01 |
| C16orf70  | -0.2880 | 1.62E-08 | 2.87E-07 |
| C16orf71  | -0.0100 | 8.48E-01 | 9.01E-01 |
| C16orf72  | -0.0764 | 1.42E-01 | 2.43E-01 |
| C16orf73  | 0.0916  | 7.81E-02 | 1.53E-01 |
| C16orf74  | 0.0847  | 1.04E-01 | 1.91E-01 |
| C16orf75  | 0.4067  | 3.29E-16 | 2.94E-14 |
| C16orf78  | -0.0035 | 9.47E-01 | 9.67E-01 |
| C16orf79  | 0.3059  | 1.78E-09 | 4.01E-08 |
| C16orf7   | -0.1525 | 3.23E-03 | 1.15E-02 |
| C16orf80  | -0.1860 | 3.16E-04 | 1.63E-03 |
| C16orf81  | 0.1100  | 3.42E-02 | 7.96E-02 |
| C16orf82  | 0.0536  | 3.03E-01 | 4.32E-01 |
| C16orf86  | -0.2280 | 9.20E-06 | 7.80E-05 |
| C16orf87  | -0.0835 | 1.08E-01 | 1.98E-01 |
| C16orf88  | 0.2336  | 5.44E-06 | 4.97E-05 |
| C16orf89  | -0.0640 | 2.19E-01 | 3.39E-01 |
| C16orf90  | 0.0780  | 1.34E-01 | 2.32E-01 |
| C16orf91  | 0.1932  | 1.81E-04 | 1.01E-03 |
| C16orf92  | 0.0792  | 1.28E-01 | 2.25E-01 |
| C16orf93  | 0.1927  | 1.88E-04 | 1.05E-03 |
| C17orf100 | 0.0527  | 3.12E-01 | 4.41E-01 |
| C17orf101 | -0.0538 | 3.01E-01 | 4.30E-01 |
| C17orf102 | -0.0774 | 1.37E-01 | 2.36E-01 |
| C17orf103 | -0.1448 | 5.19E-03 | 1.70E-02 |
| C17orf104 | 0.0781  | 1.33E-01 | 2.32E-01 |
| C17orf105 | 0.1593  | 2.09E-03 | 8.01E-03 |
| C17orf106 | -0.0841 | 1.06E-01 | 1.94E-01 |
| C17orf107 | -0.0421 | 4.19E-01 | 5.52E-01 |
| C17orf108 | -0.0786 | 1.31E-01 | 2.28E-01 |
| C17orf28  | 0.1834  | 3.85E-04 | 1.92E-03 |
| C17orf37  | 0.0992  | 5.64E-02 | 1.18E-01 |
| C17orf39  | -0.0786 | 1.31E-01 | 2.29E-01 |
| C17orf42  | 0.3573  | 1.30E-12 | 5.64E-11 |
| C17orf44  | -0.1012 | 5.14E-02 | 1.10E-01 |
| C17orf46  | 0.1063  | 4.08E-02 | 9.15E-02 |
| C17orf47  | 0.0912  | 7.94E-02 | 1.55E-01 |
| C17orf48  | -0.0516 | 3.21E-01 | 4.52E-01 |
| C17orf49  | 0.0599  | 2.50E-01 | 3.75E-01 |
| C17orf50  | 0.0599  | 2.50E-01 | 3.75E-01 |

|          |         |          |          |
|----------|---------|----------|----------|
| C17orf51 | -0.0417 | 4.23E-01 | 5.55E-01 |
| C17orf53 | 0.4221  | 1.84E-17 | 2.28E-15 |
| C17orf54 | 0.1231  | 1.77E-02 | 4.65E-02 |
| C17orf55 | 0.1812  | 4.52E-04 | 2.19E-03 |
| C17orf56 | 0.3771  | 5.57E-14 | 3.10E-12 |
| C17orf57 | 0.1304  | 1.19E-02 | 3.38E-02 |
| C17orf58 | 0.0096  | 8.54E-01 | 9.06E-01 |
| C17orf59 | -0.0079 | 8.79E-01 | 9.22E-01 |
| C17orf60 | -0.0247 | 6.36E-01 | 7.43E-01 |
| C17orf61 | -0.1942 | 1.67E-04 | 9.45E-04 |
| C17orf62 | 0.1243  | 1.66E-02 | 4.42E-02 |
| C17orf63 | 0.1846  | 3.52E-04 | 1.78E-03 |
| C17orf64 | 0.0967  | 6.29E-02 | 1.29E-01 |
| C17orf65 | 0.3168  | 4.30E-10 | 1.11E-08 |
| C17orf66 | 0.0273  | 6.01E-01 | 7.13E-01 |
| C17orf67 | 0.1846  | 3.51E-04 | 1.78E-03 |
| C17orf68 | 0.0970  | 6.19E-02 | 1.27E-01 |
| C17orf69 | 0.3498  | 4.03E-12 | 1.60E-10 |
| C17orf70 | 0.0293  | 5.74E-01 | 6.91E-01 |
| C17orf71 | 0.2596  | 3.98E-07 | 5.00E-06 |
| C17orf72 | -0.0347 | 5.05E-01 | 6.30E-01 |
| C17orf73 | 0.1442  | 5.39E-03 | 1.76E-02 |
| C17orf74 | 0.0083  | 8.74E-01 | 9.19E-01 |
| C17orf75 | 0.2290  | 8.37E-06 | 7.17E-05 |
| C17orf76 | 0.2254  | 1.17E-05 | 9.63E-05 |
| C17orf77 | 0.0454  | 3.83E-01 | 5.16E-01 |
| C17orf78 | 0.1252  | 1.59E-02 | 4.25E-02 |
| C17orf79 | 0.1285  | 1.33E-02 | 3.69E-02 |
| C17orf80 | 0.3511  | 3.35E-12 | 1.34E-10 |
| C17orf81 | -0.0773 | 1.37E-01 | 2.37E-01 |
| C17orf82 | 0.1299  | 1.23E-02 | 3.46E-02 |
| C17orf85 | 0.0427  | 4.12E-01 | 5.45E-01 |
| C17orf86 | 0.2686  | 1.50E-07 | 2.10E-06 |
| C17orf87 | -0.0892 | 8.61E-02 | 1.65E-01 |
| C17orf88 | 0.0235  | 6.52E-01 | 7.55E-01 |
| C17orf89 | 0.0008  | 9.88E-01 | 9.93E-01 |
| C17orf90 | 0.1350  | 9.24E-03 | 2.75E-02 |
| C17orf91 | -0.2137 | 3.32E-05 | 2.38E-04 |
| C17orf93 | 0.2019  | 9.03E-05 | 5.59E-04 |
| C17orf95 | 0.1632  | 1.61E-03 | 6.44E-03 |
| C17orf96 | -0.0654 | 2.09E-01 | 3.27E-01 |
| C17orf97 | -0.0477 | 3.59E-01 | 4.91E-01 |
| C17orf98 | -0.0491 | 3.45E-01 | 4.77E-01 |
| C17orf99 | 0.1992  | 1.12E-04 | 6.70E-04 |

|          |         |          |          |
|----------|---------|----------|----------|
| C18orf10 | 0.1642  | 1.51E-03 | 6.08E-03 |
| C18orf16 | 0.0263  | 6.14E-01 | 7.24E-01 |
| C18orf18 | -0.1023 | 4.90E-02 | 1.06E-01 |
| C18orf19 | -0.1821 | 4.25E-04 | 2.08E-03 |
| C18orf1  | -0.0277 | 5.95E-01 | 7.09E-01 |
| C18orf20 | -0.1519 | 3.36E-03 | 1.19E-02 |
| C18orf21 | 0.2114  | 4.07E-05 | 2.84E-04 |
| C18orf22 | -0.1567 | 2.48E-03 | 9.18E-03 |
| C18orf25 | 0.0500  | 3.37E-01 | 4.69E-01 |
| C18orf26 | 0.0187  | 7.19E-01 | 8.10E-01 |
| C18orf2  | 0.0848  | 1.03E-01 | 1.89E-01 |
| C18orf32 | -0.1724 | 8.56E-04 | 3.76E-03 |
| C18orf34 | -0.0598 | 2.50E-01 | 3.75E-01 |
| C18orf45 | 0.0431  | 4.08E-01 | 5.41E-01 |
| C18orf54 | 0.2501  | 1.07E-06 | 1.20E-05 |
| C18orf55 | -0.0356 | 4.94E-01 | 6.21E-01 |
| C18orf56 | 0.1415  | 6.33E-03 | 2.00E-02 |
| C18orf62 | 0.0226  | 6.64E-01 | 7.65E-01 |
| C18orf8  | -0.0083 | 8.73E-01 | 9.18E-01 |
| C19orf10 | -0.0074 | 8.87E-01 | 9.28E-01 |
| C19orf12 | -0.2253 | 1.18E-05 | 9.68E-05 |
| C19orf18 | 0.0708  | 1.73E-01 | 2.83E-01 |
| C19orf20 | -0.1251 | 1.59E-02 | 4.26E-02 |
| C19orf21 | 0.2259  | 1.12E-05 | 9.26E-05 |
| C19orf22 | -0.0355 | 4.96E-01 | 6.22E-01 |
| C19orf23 | 0.1105  | 3.34E-02 | 7.81E-02 |
| C19orf24 | -0.0802 | 1.23E-01 | 2.18E-01 |
| C19orf25 | 0.0293  | 5.73E-01 | 6.91E-01 |
| C19orf26 | 0.0594  | 2.54E-01 | 3.79E-01 |
| C19orf28 | -0.1857 | 3.23E-04 | 1.66E-03 |
| C19orf29 | 0.0917  | 7.76E-02 | 1.52E-01 |
| C19orf2  | 0.1036  | 4.61E-02 | 1.01E-01 |
| C19orf30 | 0.0004  | 9.94E-01 | 9.96E-01 |
| C19orf33 | 0.1357  | 8.85E-03 | 2.65E-02 |
| C19orf34 | 0.0565  | 2.78E-01 | 4.07E-01 |
| C19orf35 | -0.0520 | 3.17E-01 | 4.48E-01 |
| C19orf36 | -0.1365 | 8.49E-03 | 2.56E-02 |
| C19orf38 | -0.0775 | 1.36E-01 | 2.36E-01 |
| C19orf39 | -0.1752 | 7.01E-04 | 3.17E-03 |
| C19orf40 | 0.2318  | 6.45E-06 | 5.77E-05 |
| C19orf41 | 0.0880  | 9.04E-02 | 1.72E-01 |
| C19orf42 | -0.1299 | 1.23E-02 | 3.45E-02 |
| C19orf43 | -0.0440 | 3.98E-01 | 5.31E-01 |
| C19orf44 | 0.1511  | 3.54E-03 | 1.24E-02 |

|           |         |          |          |
|-----------|---------|----------|----------|
| C19orf45  | 0.1236  | 1.72E-02 | 4.54E-02 |
| C19orf46  | 0.0959  | 6.50E-02 | 1.32E-01 |
| C19orf47  | 0.2231  | 1.44E-05 | 1.16E-04 |
| C19orf48  | 0.2301  | 7.52E-06 | 6.55E-05 |
| C19orf50  | 0.0743  | 1.53E-01 | 2.58E-01 |
| C19orf51  | -0.0206 | 6.93E-01 | 7.88E-01 |
| C19orf52  | 0.0038  | 9.41E-01 | 9.64E-01 |
| C19orf53  | -0.0387 | 4.58E-01 | 5.88E-01 |
| C19orf54  | 0.0146  | 7.79E-01 | 8.52E-01 |
| C19orf55  | 0.1694  | 1.05E-03 | 4.48E-03 |
| C19orf56  | -0.0587 | 2.60E-01 | 3.86E-01 |
| C19orf57  | 0.1014  | 5.10E-02 | 1.09E-01 |
| C19orf59  | 0.0376  | 4.70E-01 | 6.00E-01 |
| C19orf60  | -0.0117 | 8.22E-01 | 8.83E-01 |
| C19orf61  | 0.2349  | 4.82E-06 | 4.49E-05 |
| C19orf62  | -0.0121 | 8.16E-01 | 8.79E-01 |
| C19orf63  | -0.0877 | 9.17E-02 | 1.74E-01 |
| C19orf66  | -0.1315 | 1.12E-02 | 3.20E-02 |
| C19orf69  | 0.1904  | 2.26E-04 | 1.23E-03 |
| C19orf6   | -0.0715 | 1.69E-01 | 2.78E-01 |
| C19orf70  | -0.1266 | 1.47E-02 | 4.00E-02 |
| C19orf71  | -0.0173 | 7.40E-01 | 8.25E-01 |
| C19orf73  | -0.1114 | 3.19E-02 | 7.51E-02 |
| C19orf75  | -0.0715 | 1.69E-01 | 2.78E-01 |
| C19orf76  | 0.0417  | 4.23E-01 | 5.56E-01 |
| C19orf77  | -0.0604 | 2.46E-01 | 3.71E-01 |
| C1D       | -0.0391 | 4.53E-01 | 5.84E-01 |
| C1GALT1C1 | 0.0182  | 7.27E-01 | 8.15E-01 |
| C1GALT1   | 0.1539  | 2.96E-03 | 1.07E-02 |
| C1QA      | -0.1059 | 4.16E-02 | 9.29E-02 |
| C1QBP     | -0.0899 | 8.39E-02 | 1.62E-01 |
| C1QB      | -0.1004 | 5.32E-02 | 1.13E-01 |
| C1QC      | -0.0988 | 5.73E-02 | 1.20E-01 |
| C1QL1     | 0.1219  | 1.88E-02 | 4.88E-02 |
| C1QL2     | -0.0175 | 7.37E-01 | 8.22E-01 |
| C1QL3     | -0.0045 | 9.30E-01 | 9.56E-01 |
| C1QL4     | 0.1125  | 3.02E-02 | 7.19E-02 |
| C1QTNF1   | -0.1538 | 2.97E-03 | 1.07E-02 |
| C1QTNF2   | -0.0007 | 9.89E-01 | 9.93E-01 |
| C1QTNF3   | -0.0060 | 9.09E-01 | 9.43E-01 |
| C1QTNF4   | -0.0880 | 9.05E-02 | 1.72E-01 |
| C1QTNF6   | 0.2424  | 2.32E-06 | 2.37E-05 |
| C1QTNF7   | -0.1944 | 1.64E-04 | 9.31E-04 |
| C1QTNF8   | 0.1022  | 4.92E-02 | 1.06E-01 |



|          |         |          |          |
|----------|---------|----------|----------|
| C1QTNF9B | 0.0483  | 3.54E-01 | 4.86E-01 |
| C1QTNF9  | -0.0771 | 1.38E-01 | 2.39E-01 |
| C1RL     | -0.2104 | 4.41E-05 | 3.04E-04 |
| C1R      | -0.1960 | 1.45E-04 | 8.38E-04 |
| C1S      | -0.2103 | 4.46E-05 | 3.07E-04 |
| C1orf100 | 0.0392  | 4.52E-01 | 5.83E-01 |
| C1orf101 | 0.0220  | 6.73E-01 | 7.72E-01 |
| C1orf103 | -0.0131 | 8.02E-01 | 8.69E-01 |
| C1orf104 | 0.4192  | 3.23E-17 | 3.63E-15 |
| C1orf105 | -0.0687 | 1.87E-01 | 3.00E-01 |
| C1orf106 | 0.2336  | 5.42E-06 | 4.96E-05 |
| C1orf107 | 0.1421  | 6.12E-03 | 1.95E-02 |
| C1orf109 | 0.0604  | 2.46E-01 | 3.70E-01 |
| C1orf110 | 0.0270  | 6.05E-01 | 7.17E-01 |
| C1orf111 | -0.0727 | 1.62E-01 | 2.69E-01 |
| C1orf112 | 0.4012  | 8.83E-16 | 7.30E-14 |
| C1orf113 | 0.2329  | 5.82E-06 | 5.27E-05 |
| C1orf114 | 0.0932  | 7.28E-02 | 1.45E-01 |
| C1orf115 | -0.0301 | 5.63E-01 | 6.81E-01 |
| C1orf116 | 0.1968  | 1.36E-04 | 7.95E-04 |
| C1orf122 | -0.1924 | 1.93E-04 | 1.07E-03 |
| C1orf123 | -0.0605 | 2.45E-01 | 3.69E-01 |
| C1orf124 | 0.1781  | 5.67E-04 | 2.64E-03 |
| C1orf125 | 0.2759  | 6.63E-08 | 1.01E-06 |
| C1orf126 | 0.1605  | 1.93E-03 | 7.47E-03 |
| C1orf127 | 0.0394  | 4.49E-01 | 5.81E-01 |
| C1orf128 | -0.0709 | 1.73E-01 | 2.83E-01 |
| C1orf129 | 0.0567  | 2.76E-01 | 4.04E-01 |
| C1orf130 | -0.1155 | 2.60E-02 | 6.37E-02 |
| C1orf131 | 0.3159  | 4.82E-10 | 1.23E-08 |
| C1orf133 | -0.0163 | 7.54E-01 | 8.35E-01 |
| C1orf135 | 0.3358  | 3.14E-11 | 1.03E-09 |
| C1orf141 | 0.0205  | 6.94E-01 | 7.89E-01 |
| C1orf144 | -0.0748 | 1.50E-01 | 2.54E-01 |
| C1orf146 | 0.0478  | 3.58E-01 | 4.90E-01 |
| C1orf14  | 0.0840  | 1.06E-01 | 1.95E-01 |
| C1orf150 | -0.0340 | 5.14E-01 | 6.38E-01 |
| C1orf151 | -0.0770 | 1.39E-01 | 2.39E-01 |
| C1orf152 | 0.1009  | 5.20E-02 | 1.11E-01 |
| C1orf156 | 0.4719  | 5.73E-22 | 1.89E-19 |
| C1orf157 | 0.0638  | 2.20E-01 | 3.41E-01 |
| C1orf158 | 0.1233  | 1.75E-02 | 4.59E-02 |
| C1orf159 | 0.2035  | 7.89E-05 | 4.98E-04 |
| C1orf161 | -0.1907 | 2.20E-04 | 1.20E-03 |

|          |         |          |          |
|----------|---------|----------|----------|
| C1orf162 | -0.0977 | 6.02E-02 | 1.24E-01 |
| C1orf163 | 0.0422  | 4.18E-01 | 5.51E-01 |
| C1orf168 | -0.1196 | 2.12E-02 | 5.38E-02 |
| C1orf170 | 0.0678  | 1.92E-01 | 3.07E-01 |
| C1orf172 | 0.1122  | 3.08E-02 | 7.29E-02 |
| C1orf173 | -0.0545 | 2.95E-01 | 4.25E-01 |
| C1orf174 | 0.1122  | 3.07E-02 | 7.28E-02 |
| C1orf175 | 0.0443  | 3.94E-01 | 5.27E-01 |
| C1orf177 | 0.0444  | 3.94E-01 | 5.27E-01 |
| C1orf180 | 0.1359  | 8.77E-03 | 2.63E-02 |
| C1orf182 | 0.2096  | 4.74E-05 | 3.23E-04 |
| C1orf183 | 0.0107  | 8.37E-01 | 8.93E-01 |
| C1orf185 | -0.0214 | 6.81E-01 | 7.78E-01 |
| C1orf186 | 0.1079  | 3.78E-02 | 8.63E-02 |
| C1orf187 | 0.0819  | 1.15E-01 | 2.08E-01 |
| C1orf189 | 0.0628  | 2.28E-01 | 3.50E-01 |
| C1orf190 | 0.0095  | 8.55E-01 | 9.06E-01 |
| C1orf192 | -0.0062 | 9.05E-01 | 9.40E-01 |
| C1orf194 | 0.0951  | 6.73E-02 | 1.36E-01 |
| C1orf198 | 0.1483  | 4.19E-03 | 1.43E-02 |
| C1orf200 | 0.0059  | 9.10E-01 | 9.43E-01 |
| C1orf201 | 0.1128  | 2.98E-02 | 7.10E-02 |
| C1orf203 | 0.1826  | 4.08E-04 | 2.01E-03 |
| C1orf204 | 0.1956  | 1.50E-04 | 8.65E-04 |
| C1orf210 | 0.0233  | 6.55E-01 | 7.57E-01 |
| C1orf212 | -0.2197 | 1.96E-05 | 1.52E-04 |
| C1orf213 | 0.2090  | 4.98E-05 | 3.37E-04 |
| C1orf216 | 0.1442  | 5.39E-03 | 1.76E-02 |
| C1orf21  | 0.0087  | 8.68E-01 | 9.15E-01 |
| C1orf220 | 0.2256  | 1.15E-05 | 9.50E-05 |
| C1orf223 | 0.0077  | 8.82E-01 | 9.25E-01 |
| C1orf226 | 0.2039  | 7.64E-05 | 4.86E-04 |
| C1orf227 | 0.0493  | 3.44E-01 | 4.76E-01 |
| C1orf228 | 0.0312  | 5.49E-01 | 6.70E-01 |
| C1orf229 | 0.1328  | 1.04E-02 | 3.02E-02 |
| C1orf230 | 0.1407  | 6.63E-03 | 2.08E-02 |
| C1orf25  | 0.0698  | 1.80E-01 | 2.91E-01 |
| C1orf26  | 0.1875  | 2.83E-04 | 1.48E-03 |
| C1orf27  | 0.2203  | 1.85E-05 | 1.44E-04 |
| C1orf31  | 0.2489  | 1.20E-06 | 1.33E-05 |
| C1orf35  | 0.4391  | 6.38E-19 | 1.25E-16 |
| C1orf38  | -0.0688 | 1.86E-01 | 2.99E-01 |
| C1orf43  | 0.3413  | 1.42E-11 | 4.93E-10 |
| C1orf49  | 0.0389  | 4.55E-01 | 5.86E-01 |

|           |         |          |          |
|-----------|---------|----------|----------|
| C1orf50   | -0.0811 | 1.19E-01 | 2.13E-01 |
| C1orf51   | 0.1664  | 1.30E-03 | 5.36E-03 |
| C1orf52   | 0.3213  | 2.34E-10 | 6.43E-09 |
| C1orf53   | -0.0957 | 6.56E-02 | 1.33E-01 |
| C1orf54   | 0.0152  | 7.71E-01 | 8.46E-01 |
| C1orf55   | 0.0863  | 9.69E-02 | 1.82E-01 |
| C1orf56   | 0.2923  | 9.68E-09 | 1.80E-07 |
| C1orf57   | 0.1215  | 1.92E-02 | 4.98E-02 |
| C1orf58   | 0.0319  | 5.40E-01 | 6.61E-01 |
| C1orf59   | 0.1129  | 2.97E-02 | 7.09E-02 |
| C1orf61   | 0.1191  | 2.18E-02 | 5.50E-02 |
| C1orf63   | 0.1488  | 4.07E-03 | 1.40E-02 |
| C1orf64   | -0.0252 | 6.28E-01 | 7.36E-01 |
| C1orf65   | 0.3237  | 1.70E-10 | 4.79E-09 |
| C1orf66   | 0.1902  | 2.28E-04 | 1.24E-03 |
| C1orf68   | 0.0153  | 7.69E-01 | 8.44E-01 |
| C1orf69   | -0.0520 | 3.18E-01 | 4.48E-01 |
| C1orf70   | 0.0578  | 2.67E-01 | 3.94E-01 |
| C1orf74   | 0.2582  | 4.59E-07 | 5.69E-06 |
| C1orf77   | 0.6459  | 3.55E-45 | 1.42E-41 |
| C1orf83   | 0.1657  | 1.36E-03 | 5.56E-03 |
| C1orf84   | 0.0844  | 1.04E-01 | 1.92E-01 |
| C1orf85   | 0.2049  | 7.01E-05 | 4.51E-04 |
| C1orf86   | -0.0450 | 3.88E-01 | 5.21E-01 |
| C1orf87   | -0.0859 | 9.87E-02 | 1.84E-01 |
| C1orf88   | 0.2119  | 3.90E-05 | 2.74E-04 |
| C1orf89   | -0.1825 | 4.12E-04 | 2.03E-03 |
| C1orf91   | 0.2550  | 6.42E-07 | 7.63E-06 |
| C1orf92   | 0.0459  | 3.78E-01 | 5.11E-01 |
| C1orf93   | 0.1368  | 8.34E-03 | 2.52E-02 |
| C1orf94   | 0.0548  | 2.92E-01 | 4.21E-01 |
| C1orf95   | -0.1838 | 3.72E-04 | 1.86E-03 |
| C1orf96   | 0.3365  | 2.82E-11 | 9.36E-10 |
| C1orf97   | 0.0222  | 6.70E-01 | 7.70E-01 |
| C1orf9    | 0.4194  | 3.09E-17 | 3.52E-15 |
| C20orf103 | 0.1116  | 3.16E-02 | 7.44E-02 |
| C20orf106 | 0.2076  | 5.62E-05 | 3.75E-04 |
| C20orf107 | 0.1096  | 3.48E-02 | 8.06E-02 |
| C20orf108 | -0.2508 | 9.92E-07 | 1.12E-05 |
| C20orf111 | 0.1155  | 2.62E-02 | 6.39E-02 |
| C20orf112 | 0.1205  | 2.02E-02 | 5.18E-02 |
| C20orf114 | 0.1264  | 1.48E-02 | 4.04E-02 |
| C20orf117 | 0.2159  | 2.73E-05 | 2.02E-04 |
| C20orf118 | 0.2991  | 4.21E-09 | 8.58E-08 |

|           |         |          |          |
|-----------|---------|----------|----------|
| C20orf11  | 0.1720  | 8.79E-04 | 3.85E-03 |
| C20orf123 | -0.0410 | 4.31E-01 | 5.64E-01 |
| C20orf12  | 0.1561  | 2.57E-03 | 9.49E-03 |
| C20orf132 | -0.2198 | 1.93E-05 | 1.50E-04 |
| C20orf134 | 0.1085  | 3.66E-02 | 8.41E-02 |
| C20orf135 | -0.0307 | 5.56E-01 | 6.75E-01 |
| C20orf141 | -0.0172 | 7.42E-01 | 8.26E-01 |
| C20orf144 | 0.1078  | 3.79E-02 | 8.64E-02 |
| C20orf151 | 0.0725  | 1.63E-01 | 2.71E-01 |
| C20orf152 | 0.1865  | 3.04E-04 | 1.58E-03 |
| C20orf160 | -0.2340 | 5.22E-06 | 4.82E-05 |
| C20orf165 | 0.1292  | 1.28E-02 | 3.57E-02 |
| C20orf166 | 0.0124  | 8.11E-01 | 8.76E-01 |
| C20orf173 | 0.0809  | 1.20E-01 | 2.14E-01 |
| C20orf177 | 0.0845  | 1.04E-01 | 1.91E-01 |
| C20orf186 | 0.2340  | 5.24E-06 | 4.83E-05 |
| C20orf191 | 0.0565  | 2.78E-01 | 4.07E-01 |
| C20orf194 | 0.0965  | 6.34E-02 | 1.30E-01 |
| C20orf195 | 0.0879  | 9.09E-02 | 1.72E-01 |
| C20orf196 | 0.0196  | 7.07E-01 | 7.99E-01 |
| C20orf197 | 0.0607  | 2.44E-01 | 3.68E-01 |
| C20orf199 | 0.1001  | 5.41E-02 | 1.14E-01 |
| C20orf200 | -0.0316 | 5.44E-01 | 6.65E-01 |
| C20orf201 | 0.0534  | 3.05E-01 | 4.35E-01 |
| C20orf202 | -0.0443 | 3.95E-01 | 5.28E-01 |
| C20orf203 | 0.0545  | 2.95E-01 | 4.25E-01 |
| C20orf20  | 0.2068  | 6.00E-05 | 3.94E-04 |
| C20orf24  | -0.0116 | 8.24E-01 | 8.85E-01 |
| C20orf26  | 0.0557  | 2.84E-01 | 4.13E-01 |
| C20orf27  | 0.0792  | 1.28E-01 | 2.25E-01 |
| C20orf29  | -0.1226 | 1.82E-02 | 4.75E-02 |
| C20orf30  | -0.2311 | 6.90E-06 | 6.11E-05 |
| C20orf3   | -0.1848 | 3.47E-04 | 1.76E-03 |
| C20orf43  | 0.0684  | 1.88E-01 | 3.02E-01 |
| C20orf46  | 0.0637  | 2.21E-01 | 3.42E-01 |
| C20orf4   | 0.0761  | 1.44E-01 | 2.45E-01 |
| C20orf54  | 0.0202  | 6.98E-01 | 7.92E-01 |
| C20orf56  | -0.1731 | 8.11E-04 | 3.59E-03 |
| C20orf70  | 0.1911  | 2.14E-04 | 1.16E-03 |
| C20orf72  | 0.2644  | 2.37E-07 | 3.15E-06 |
| C20orf7   | -0.0732 | 1.59E-01 | 2.65E-01 |
| C20orf85  | 0.0269  | 6.06E-01 | 7.18E-01 |
| C20orf94  | -0.0024 | 9.63E-01 | 9.77E-01 |
| C20orf96  | 0.1559  | 2.60E-03 | 9.57E-03 |

|           |         |          |          |
|-----------|---------|----------|----------|
| C21orf119 | 0.0306  | 5.57E-01 | 6.76E-01 |
| C21orf121 | -0.1152 | 2.65E-02 | 6.47E-02 |
| C21orf122 | 0.0273  | 6.00E-01 | 7.13E-01 |
| C21orf125 | 0.0898  | 8.39E-02 | 1.62E-01 |
| C21orf128 | 0.0543  | 2.97E-01 | 4.26E-01 |
| C21orf129 | 0.1327  | 1.05E-02 | 3.04E-02 |
| C21orf130 | 0.0875  | 9.25E-02 | 1.75E-01 |
| C21orf131 | 0.0352  | 4.99E-01 | 6.25E-01 |
| C21orf15  | 0.0645  | 2.16E-01 | 3.35E-01 |
| C21orf29  | 0.0205  | 6.93E-01 | 7.89E-01 |
| C21orf2   | -0.0737 | 1.56E-01 | 2.62E-01 |
| C21orf33  | -0.2678 | 1.63E-07 | 2.26E-06 |
| C21orf34  | -0.2599 | 3.84E-07 | 4.85E-06 |
| C21orf45  | 0.2967  | 5.60E-09 | 1.11E-07 |
| C21orf49  | 0.0951  | 6.74E-02 | 1.36E-01 |
| C21orf54  | -0.0392 | 4.52E-01 | 5.83E-01 |
| C21orf56  | 0.1943  | 1.66E-04 | 9.38E-04 |
| C21orf57  | 0.0049  | 9.26E-01 | 9.53E-01 |
| C21orf58  | 0.3911  | 5.22E-15 | 3.60E-13 |
| C21orf59  | 0.2293  | 8.17E-06 | 7.02E-05 |
| C21orf62  | 0.0556  | 2.86E-01 | 4.15E-01 |
| C21orf63  | -0.0841 | 1.06E-01 | 1.94E-01 |
| C21orf67  | -0.1130 | 2.96E-02 | 7.06E-02 |
| C21orf70  | 0.0079  | 8.79E-01 | 9.22E-01 |
| C21orf71  | 0.0033  | 9.49E-01 | 9.68E-01 |
| C21orf7   | -0.0836 | 1.08E-01 | 1.97E-01 |
| C21orf81  | 0.1692  | 1.07E-03 | 4.55E-03 |
| C21orf82  | -0.0375 | 4.71E-01 | 6.00E-01 |
| C21orf84  | -0.0363 | 4.86E-01 | 6.14E-01 |
| C21orf88  | 0.0030  | 9.54E-01 | 9.72E-01 |
| C21orf90  | -0.0087 | 8.67E-01 | 9.14E-01 |
| C21orf91  | -0.0114 | 8.27E-01 | 8.87E-01 |
| C21orf94  | 0.0660  | 2.05E-01 | 3.22E-01 |
| C21orf96  | -0.0424 | 4.15E-01 | 5.48E-01 |
| C21orf99  | 0.1589  | 2.14E-03 | 8.15E-03 |
| C22orf13  | -0.1699 | 1.02E-03 | 4.36E-03 |
| C22orf15  | -0.0724 | 1.64E-01 | 2.71E-01 |
| C22orf23  | 0.2247  | 1.24E-05 | 1.02E-04 |
| C22orf24  | 0.0170  | 7.45E-01 | 8.28E-01 |
| C22orf25  | -0.0541 | 2.99E-01 | 4.28E-01 |
| C22orf26  | -0.0001 | 9.98E-01 | 9.99E-01 |
| C22orf27  | 0.1311  | 1.15E-02 | 3.28E-02 |
| C22orf28  | -0.0238 | 6.48E-01 | 7.52E-01 |
| C22orf29  | 0.3339  | 4.11E-11 | 1.31E-09 |

|          |         |          |          |
|----------|---------|----------|----------|
| C22orf30 | 0.2226  | 1.50E-05 | 1.20E-04 |
| C22orf31 | 0.0342  | 5.12E-01 | 6.36E-01 |
| C22orf32 | -0.0739 | 1.55E-01 | 2.61E-01 |
| C22orf33 | -0.0861 | 9.78E-02 | 1.83E-01 |
| C22orf34 | 0.0278  | 5.93E-01 | 7.07E-01 |
| C22orf36 | 0.0621  | 2.33E-01 | 3.56E-01 |
| C22orf39 | 0.1539  | 2.95E-03 | 1.06E-02 |
| C22orf40 | 0.1672  | 1.23E-03 | 5.11E-03 |
| C22orf41 | 0.0994  | 5.58E-02 | 1.17E-01 |
| C22orf42 | -0.0323 | 5.35E-01 | 6.57E-01 |
| C22orf43 | 0.2090  | 4.97E-05 | 3.37E-04 |
| C22orf45 | 0.0083  | 8.73E-01 | 9.18E-01 |
| C22orf46 | 0.1070  | 3.94E-02 | 8.90E-02 |
| C22orf9  | -0.0096 | 8.54E-01 | 9.05E-01 |
| C2CD2L   | 0.0290  | 5.77E-01 | 6.94E-01 |
| C2CD2    | 0.0720  | 1.66E-01 | 2.74E-01 |
| C2CD3    | 0.1698  | 1.03E-03 | 4.40E-03 |
| C2CD4A   | 0.0021  | 9.68E-01 | 9.80E-01 |
| C2CD4B   | -0.0786 | 1.31E-01 | 2.28E-01 |
| C2CD4C   | -0.0501 | 3.36E-01 | 4.68E-01 |
| C2CD4D   | 0.2396  | 3.05E-06 | 3.01E-05 |
| C2orf14  | 0.0491  | 3.46E-01 | 4.78E-01 |
| C2orf15  | 0.1183  | 2.27E-02 | 5.69E-02 |
| C2orf16  | -0.0473 | 3.64E-01 | 4.96E-01 |
| C2orf18  | 0.0008  | 9.87E-01 | 9.92E-01 |
| C2orf24  | -0.0963 | 6.38E-02 | 1.30E-01 |
| C2orf27A | 0.2498  | 1.10E-06 | 1.23E-05 |
| C2orf27B | -0.0341 | 5.12E-01 | 6.37E-01 |
| C2orf28  | 0.0888  | 8.76E-02 | 1.67E-01 |
| C2orf29  | 0.2847  | 2.38E-08 | 4.03E-07 |
| C2orf34  | 0.0019  | 9.70E-01 | 9.81E-01 |
| C2orf39  | 0.0293  | 5.74E-01 | 6.91E-01 |
| C2orf3   | -0.0041 | 9.38E-01 | 9.61E-01 |
| C2orf40  | -0.1569 | 2.44E-03 | 9.09E-03 |
| C2orf42  | -0.1186 | 2.23E-02 | 5.61E-02 |
| C2orf43  | 0.1295  | 1.25E-02 | 3.51E-02 |
| C2orf44  | 0.2629  | 2.80E-07 | 3.68E-06 |
| C2orf47  | -0.2368 | 3.98E-06 | 3.82E-05 |
| C2orf48  | 0.3878  | 9.26E-15 | 6.03E-13 |
| C2orf49  | 0.0474  | 3.62E-01 | 4.95E-01 |
| C2orf50  | 0.1469  | 4.59E-03 | 1.54E-02 |
| C2orf51  | -0.1331 | 1.03E-02 | 2.98E-02 |
| C2orf52  | 0.1237  | 1.71E-02 | 4.52E-02 |
| C2orf53  | 0.0250  | 6.32E-01 | 7.39E-01 |

|         |         |          |          |
|---------|---------|----------|----------|
| C2orf54 | 0.0674  | 1.95E-01 | 3.11E-01 |
| C2orf55 | -0.1117 | 3.15E-02 | 7.42E-02 |
| C2orf56 | -0.1284 | 1.33E-02 | 3.71E-02 |
| C2orf57 | 0.0216  | 6.78E-01 | 7.76E-01 |
| C2orf58 | -0.0245 | 6.38E-01 | 7.45E-01 |
| C2orf60 | 0.0653  | 2.10E-01 | 3.28E-01 |
| C2orf61 | 0.0810  | 1.19E-01 | 2.14E-01 |
| C2orf62 | -0.0782 | 1.33E-01 | 2.31E-01 |
| C2orf63 | 0.0489  | 3.48E-01 | 4.80E-01 |
| C2orf64 | -0.0737 | 1.57E-01 | 2.62E-01 |
| C2orf65 | 0.0425  | 4.15E-01 | 5.47E-01 |
| C2orf66 | 0.0452  | 3.85E-01 | 5.19E-01 |
| C2orf67 | 0.1097  | 3.47E-02 | 8.05E-02 |
| C2orf68 | 0.1831  | 3.93E-04 | 1.95E-03 |
| C2orf69 | -0.1932 | 1.80E-04 | 1.01E-03 |
| C2orf70 | 0.1483  | 4.20E-03 | 1.43E-02 |
| C2orf71 | -0.0086 | 8.70E-01 | 9.16E-01 |
| C2orf72 | -0.0840 | 1.06E-01 | 1.95E-01 |
| C2orf73 | 0.0696  | 1.81E-01 | 2.93E-01 |
| C2orf74 | -0.0733 | 1.59E-01 | 2.65E-01 |
| C2orf76 | 0.1457  | 4.92E-03 | 1.63E-02 |
| C2orf77 | 0.0450  | 3.88E-01 | 5.21E-01 |
| C2orf78 | -0.0597 | 2.52E-01 | 3.77E-01 |
| C2orf79 | -0.0326 | 5.31E-01 | 6.53E-01 |
| C2orf7  | -0.2291 | 8.26E-06 | 7.09E-05 |
| C2orf80 | -0.0264 | 6.12E-01 | 7.23E-01 |
| C2orf81 | 0.1152  | 2.65E-02 | 6.46E-02 |
| C2orf82 | 0.0311  | 5.51E-01 | 6.71E-01 |
| C2orf83 | 0.0415  | 4.25E-01 | 5.58E-01 |
| C2orf84 | -0.0744 | 1.53E-01 | 2.57E-01 |
| C2orf85 | -0.0493 | 3.43E-01 | 4.75E-01 |
| C2orf86 | -0.0343 | 5.10E-01 | 6.35E-01 |
| C2orf88 | -0.0530 | 3.08E-01 | 4.38E-01 |
| C2orf89 | -0.0760 | 1.44E-01 | 2.46E-01 |
| C2      | -0.0735 | 1.57E-01 | 2.63E-01 |
| C3AR1   | -0.0751 | 1.49E-01 | 2.52E-01 |
| C3P1    | -0.1752 | 7.00E-04 | 3.17E-03 |
| C3orf10 | -0.0210 | 6.87E-01 | 7.83E-01 |
| C3orf14 | 0.1042  | 4.49E-02 | 9.89E-02 |
| C3orf15 | 0.0026  | 9.60E-01 | 9.75E-01 |
| C3orf16 | 0.0316  | 5.44E-01 | 6.65E-01 |
| C3orf17 | 0.1611  | 1.85E-03 | 7.22E-03 |
| C3orf18 | 0.0324  | 5.34E-01 | 6.57E-01 |
| C3orf19 | 0.1046  | 4.41E-02 | 9.74E-02 |

|         |         |          |          |
|---------|---------|----------|----------|
| C3orf1  | -0.0626 | 2.29E-01 | 3.51E-01 |
| C3orf20 | -0.0422 | 4.17E-01 | 5.50E-01 |
| C3orf21 | 0.2046  | 7.19E-05 | 4.61E-04 |
| C3orf22 | 0.0926  | 7.47E-02 | 1.48E-01 |
| C3orf23 | -0.2125 | 3.70E-05 | 2.62E-04 |
| C3orf24 | 0.0554  | 2.88E-01 | 4.16E-01 |
| C3orf26 | 0.2058  | 6.54E-05 | 4.25E-04 |
| C3orf27 | 0.0598  | 2.50E-01 | 3.76E-01 |
| C3orf30 | 0.0324  | 5.34E-01 | 6.56E-01 |
| C3orf31 | 0.0021  | 9.68E-01 | 9.80E-01 |
| C3orf32 | 0.0369  | 4.79E-01 | 6.08E-01 |
| C3orf33 | 0.1434  | 5.65E-03 | 1.82E-02 |
| C3orf34 | 0.2763  | 6.29E-08 | 9.58E-07 |
| C3orf35 | 0.2069  | 5.91E-05 | 3.91E-04 |
| C3orf36 | -0.2573 | 5.06E-07 | 6.18E-06 |
| C3orf37 | 0.0865  | 9.60E-02 | 1.80E-01 |
| C3orf38 | 0.1061  | 4.11E-02 | 9.21E-02 |
| C3orf39 | 0.0713  | 1.70E-01 | 2.80E-01 |
| C3orf42 | 0.1033  | 4.67E-02 | 1.02E-01 |
| C3orf43 | 0.1364  | 8.52E-03 | 2.56E-02 |
| C3orf45 | -0.0098 | 8.51E-01 | 9.04E-01 |
| C3orf47 | 0.1726  | 8.45E-04 | 3.72E-03 |
| C3orf48 | 0.0928  | 7.42E-02 | 1.47E-01 |
| C3orf49 | -0.0391 | 4.53E-01 | 5.84E-01 |
| C3orf50 | 0.1468  | 4.60E-03 | 1.54E-02 |
| C3orf51 | -0.0400 | 4.43E-01 | 5.74E-01 |
| C3orf52 | 0.2116  | 3.99E-05 | 2.79E-04 |
| C3orf54 | 0.0335  | 5.20E-01 | 6.44E-01 |
| C3orf55 | 0.1735  | 7.93E-04 | 3.53E-03 |
| C3orf57 | 0.1353  | 9.08E-03 | 2.71E-02 |
| C3orf58 | 0.0100  | 8.48E-01 | 9.01E-01 |
| C3orf59 | -0.0540 | 2.99E-01 | 4.29E-01 |
| C3orf62 | 0.1754  | 6.91E-04 | 3.14E-03 |
| C3orf63 | 0.1544  | 2.87E-03 | 1.04E-02 |
| C3orf64 | -0.0653 | 2.09E-01 | 3.28E-01 |
| C3orf65 | 0.1202  | 2.06E-02 | 5.25E-02 |
| C3orf66 | 0.0265  | 6.10E-01 | 7.22E-01 |
| C3orf67 | 0.0399  | 4.44E-01 | 5.75E-01 |
| C3orf70 | -0.0965 | 6.35E-02 | 1.30E-01 |
| C3orf71 | 0.2277  | 9.48E-06 | 8.01E-05 |
| C3orf72 | 0.1485  | 4.14E-03 | 1.41E-02 |
| C3orf74 | 0.1526  | 3.22E-03 | 1.15E-02 |
| C3orf75 | -0.0792 | 1.28E-01 | 2.25E-01 |
| C3orf77 | -0.0349 | 5.03E-01 | 6.28E-01 |



|         |         |          |          |
|---------|---------|----------|----------|
| C3orf79 | -0.0266 | 6.10E-01 | 7.21E-01 |
| C3      | -0.1310 | 1.16E-02 | 3.29E-02 |
| C4A     | -0.1533 | 3.07E-03 | 1.10E-02 |
| C4BPA   | -0.1355 | 8.96E-03 | 2.68E-02 |
| C4BPB   | -0.0280 | 5.91E-01 | 7.06E-01 |
| C4orf10 | 0.1282  | 1.35E-02 | 3.74E-02 |
| C4orf12 | -0.0796 | 1.26E-01 | 2.22E-01 |
| C4orf14 | 0.0539  | 3.01E-01 | 4.30E-01 |
| C4orf17 | 0.1136  | 2.87E-02 | 6.91E-02 |
| C4orf19 | -0.0481 | 3.56E-01 | 4.88E-01 |
| C4orf21 | 0.2823  | 3.18E-08 | 5.21E-07 |
| C4orf22 | 0.0918  | 7.74E-02 | 1.52E-01 |
| C4orf23 | 0.0624  | 2.30E-01 | 3.53E-01 |
| C4orf26 | 0.1124  | 3.04E-02 | 7.23E-02 |
| C4orf27 | 0.0436  | 4.02E-01 | 5.35E-01 |
| C4orf29 | -0.1593 | 2.08E-03 | 7.98E-03 |
| C4orf31 | -0.1365 | 8.46E-03 | 2.55E-02 |
| C4orf32 | -0.1482 | 4.23E-03 | 1.44E-02 |
| C4orf33 | -0.1754 | 6.91E-04 | 3.13E-03 |
| C4orf34 | -0.2407 | 2.74E-06 | 2.74E-05 |
| C4orf35 | -0.0069 | 8.95E-01 | 9.33E-01 |
| C4orf36 | -0.0947 | 6.83E-02 | 1.38E-01 |
| C4orf37 | 0.0745  | 1.52E-01 | 2.57E-01 |
| C4orf38 | -0.1099 | 3.43E-02 | 7.98E-02 |
| C4orf39 | 0.2050  | 6.97E-05 | 4.49E-04 |
| C4orf3  | -0.3182 | 3.54E-10 | 9.39E-09 |
| C4orf40 | -0.0172 | 7.42E-01 | 8.26E-01 |
| C4orf41 | -0.2262 | 1.09E-05 | 9.04E-05 |
| C4orf42 | 0.0836  | 1.08E-01 | 1.97E-01 |
| C4orf43 | -0.0106 | 8.38E-01 | 8.94E-01 |
| C4orf44 | 0.1555  | 2.67E-03 | 9.79E-03 |
| C4orf45 | -0.0051 | 9.22E-01 | 9.50E-01 |
| C4orf46 | 0.2898  | 1.31E-08 | 2.36E-07 |
| C4orf47 | 0.1234  | 1.74E-02 | 4.59E-02 |
| C4orf48 | 0.1045  | 4.42E-02 | 9.75E-02 |
| C4orf49 | -0.1775 | 5.92E-04 | 2.74E-03 |
| C4orf50 | -0.0286 | 5.83E-01 | 6.99E-01 |
| C4orf51 | 0.0445  | 3.92E-01 | 5.25E-01 |
| C4orf52 | -0.0069 | 8.94E-01 | 9.32E-01 |
| C4orf6  | 0.1433  | 5.68E-03 | 1.83E-02 |
| C4orf7  | 0.1961  | 1.44E-04 | 8.34E-04 |
| C5AR1   | -0.1318 | 1.11E-02 | 3.17E-02 |
| C5orf13 | 0.1863  | 3.10E-04 | 1.60E-03 |
| C5orf15 | -0.0378 | 4.68E-01 | 5.98E-01 |

|          |         |          |          |
|----------|---------|----------|----------|
| C5orf20  | -0.0111 | 8.31E-01 | 8.89E-01 |
| C5orf22  | 0.1874  | 2.84E-04 | 1.49E-03 |
| C5orf23  | -0.2255 | 1.16E-05 | 9.56E-05 |
| C5orf24  | -0.0619 | 2.34E-01 | 3.58E-01 |
| C5orf25  | 0.1256  | 1.55E-02 | 4.17E-02 |
| C5orf27  | -0.2564 | 5.56E-07 | 6.71E-06 |
| C5orf28  | 0.1403  | 6.79E-03 | 2.12E-02 |
| C5orf30  | 0.1967  | 1.37E-04 | 7.97E-04 |
| C5orf32  | -0.0700 | 1.79E-01 | 2.90E-01 |
| C5orf33  | -0.2357 | 4.45E-06 | 4.21E-05 |
| C5orf34  | 0.4374  | 9.15E-19 | 1.67E-16 |
| C5orf35  | -0.1699 | 1.02E-03 | 4.36E-03 |
| C5orf36  | -0.1520 | 3.34E-03 | 1.18E-02 |
| C5orf38  | -0.0230 | 6.59E-01 | 7.60E-01 |
| C5orf39  | 0.1406  | 6.70E-03 | 2.10E-02 |
| C5orf40  | -0.0263 | 6.14E-01 | 7.24E-01 |
| C5orf41  | -0.1239 | 1.70E-02 | 4.50E-02 |
| C5orf42  | 0.2107  | 4.31E-05 | 2.99E-04 |
| C5orf43  | -0.0185 | 7.23E-01 | 8.12E-01 |
| C5orf44  | 0.0337  | 5.18E-01 | 6.42E-01 |
| C5orf45  | 0.0031  | 9.52E-01 | 9.70E-01 |
| C5orf46  | 0.1246  | 1.63E-02 | 4.36E-02 |
| C5orf47  | -0.0164 | 7.53E-01 | 8.34E-01 |
| C5orf48  | 0.0205  | 6.94E-01 | 7.89E-01 |
| C5orf49  | 0.0730  | 1.61E-01 | 2.67E-01 |
| C5orf4   | -0.3470 | 6.13E-12 | 2.32E-10 |
| C5orf51  | 0.0599  | 2.50E-01 | 3.75E-01 |
| C5orf52  | 0.0576  | 2.68E-01 | 3.96E-01 |
| C5orf53  | -0.1233 | 1.75E-02 | 4.60E-02 |
| C5orf54  | 0.4446  | 2.08E-19 | 4.45E-17 |
| C5orf55  | -0.1421 | 6.12E-03 | 1.95E-02 |
| C5orf56  | 0.0993  | 5.60E-02 | 1.17E-01 |
| C5orf58  | 0.0716  | 1.69E-01 | 2.77E-01 |
| C5orf60  | 0.1579  | 2.29E-03 | 8.63E-03 |
| C5orf62  | -0.1190 | 2.18E-02 | 5.52E-02 |
| C5       | -0.0898 | 8.42E-02 | 1.62E-01 |
| C6orf103 | 0.1007  | 5.26E-02 | 1.12E-01 |
| C6orf105 | 0.0235  | 6.51E-01 | 7.55E-01 |
| C6orf106 | -0.0674 | 1.95E-01 | 3.11E-01 |
| C6orf108 | -0.0011 | 9.83E-01 | 9.89E-01 |
| C6orf10  | 0.0189  | 7.17E-01 | 8.07E-01 |
| C6orf114 | -0.0960 | 6.47E-02 | 1.32E-01 |
| C6orf115 | -0.0791 | 1.28E-01 | 2.25E-01 |
| C6orf118 | -0.0539 | 3.01E-01 | 4.30E-01 |

|          |         |          |          |
|----------|---------|----------|----------|
| C6orf120 | 0.0539  | 3.00E-01 | 4.29E-01 |
| C6orf122 | -0.0188 | 7.19E-01 | 8.09E-01 |
| C6orf123 | -0.1047 | 4.39E-02 | 9.71E-02 |
| C6orf124 | 0.1815  | 4.42E-04 | 2.14E-03 |
| C6orf125 | 0.1705  | 9.79E-04 | 4.22E-03 |
| C6orf126 | 0.1983  | 1.21E-04 | 7.15E-04 |
| C6orf127 | 0.0976  | 6.03E-02 | 1.25E-01 |
| C6orf129 | 0.1610  | 1.86E-03 | 7.24E-03 |
| C6orf130 | -0.0650 | 2.11E-01 | 3.30E-01 |
| C6orf132 | 0.2092  | 4.89E-05 | 3.32E-04 |
| C6orf134 | 0.3017  | 3.02E-09 | 6.37E-08 |
| C6orf136 | 0.0556  | 2.85E-01 | 4.14E-01 |
| C6orf138 | -0.2413 | 2.57E-06 | 2.59E-05 |
| C6orf141 | 0.1242  | 1.67E-02 | 4.44E-02 |
| C6orf142 | -0.1830 | 3.95E-04 | 1.96E-03 |
| C6orf145 | -0.2696 | 1.34E-07 | 1.90E-06 |
| C6orf146 | 0.0543  | 2.97E-01 | 4.26E-01 |
| C6orf147 | 0.2707  | 1.19E-07 | 1.69E-06 |
| C6orf150 | 0.1000  | 5.44E-02 | 1.15E-01 |
| C6orf153 | 0.1470  | 4.55E-03 | 1.53E-02 |
| C6orf154 | 0.0144  | 7.82E-01 | 8.55E-01 |
| C6orf155 | -0.0790 | 1.29E-01 | 2.26E-01 |
| C6orf15  | -0.0432 | 4.07E-01 | 5.40E-01 |
| C6orf162 | 0.2609  | 3.44E-07 | 4.41E-06 |
| C6orf163 | 0.2392  | 3.16E-06 | 3.11E-05 |
| C6orf164 | 0.0680  | 1.91E-01 | 3.06E-01 |
| C6orf165 | 0.0855  | 1.00E-01 | 1.86E-01 |
| C6orf167 | 0.3892  | 7.24E-15 | 4.81E-13 |
| C6orf168 | 0.1423  | 6.05E-03 | 1.93E-02 |
| C6orf170 | 0.1817  | 4.36E-04 | 2.12E-03 |
| C6orf174 | -0.0371 | 4.76E-01 | 6.05E-01 |
| C6orf176 | -0.1239 | 1.69E-02 | 4.49E-02 |
| C6orf182 | 0.2364  | 4.15E-06 | 3.95E-05 |
| C6orf186 | 0.0923  | 7.58E-02 | 1.49E-01 |
| C6orf191 | 0.0394  | 4.50E-01 | 5.81E-01 |
| C6orf192 | 0.1069  | 3.95E-02 | 8.93E-02 |
| C6orf195 | 0.2201  | 1.89E-05 | 1.47E-04 |
| C6orf1   | 0.0048  | 9.26E-01 | 9.54E-01 |
| C6orf201 | 0.0327  | 5.30E-01 | 6.53E-01 |
| C6orf203 | 0.0255  | 6.24E-01 | 7.33E-01 |
| C6orf204 | -0.0088 | 8.67E-01 | 9.14E-01 |
| C6orf208 | -0.2123 | 3.75E-05 | 2.66E-04 |
| C6orf211 | -0.0496 | 3.41E-01 | 4.72E-01 |
| C6orf217 | -0.0210 | 6.87E-01 | 7.83E-01 |

|          |         |          |          |
|----------|---------|----------|----------|
| C6orf218 | 0.0668  | 1.99E-01 | 3.15E-01 |
| C6orf221 | 0.1297  | 1.24E-02 | 3.48E-02 |
| C6orf222 | 0.1260  | 1.52E-02 | 4.11E-02 |
| C6orf223 | 0.2340  | 5.25E-06 | 4.84E-05 |
| C6orf225 | -0.0122 | 8.14E-01 | 8.78E-01 |
| C6orf226 | -0.1428 | 5.86E-03 | 1.88E-02 |
| C6orf227 | 0.0268  | 6.07E-01 | 7.19E-01 |
| C6orf25  | -0.0305 | 5.58E-01 | 6.77E-01 |
| C6orf26  | 0.3372  | 2.56E-11 | 8.53E-10 |
| C6orf27  | 0.0615  | 2.37E-01 | 3.61E-01 |
| C6orf35  | -0.0754 | 1.47E-01 | 2.50E-01 |
| C6orf41  | -0.0167 | 7.49E-01 | 8.31E-01 |
| C6orf47  | 0.0677  | 1.93E-01 | 3.08E-01 |
| C6orf48  | 0.1682  | 1.15E-03 | 4.83E-03 |
| C6orf52  | 0.1072  | 3.91E-02 | 8.84E-02 |
| C6orf57  | 0.0815  | 1.17E-01 | 2.10E-01 |
| C6orf58  | 0.0393  | 4.50E-01 | 5.82E-01 |
| C6orf59  | 0.1256  | 1.55E-02 | 4.17E-02 |
| C6orf62  | 0.1567  | 2.47E-03 | 9.18E-03 |
| C6orf64  | 0.2215  | 1.67E-05 | 1.32E-04 |
| C6orf70  | 0.0874  | 9.27E-02 | 1.75E-01 |
| C6orf72  | -0.0962 | 6.41E-02 | 1.31E-01 |
| C6orf81  | 0.1115  | 3.19E-02 | 7.50E-02 |
| C6orf89  | 0.0425  | 4.15E-01 | 5.48E-01 |
| C6orf94  | 0.1681  | 1.15E-03 | 4.86E-03 |
| C6orf97  | -0.0600 | 2.49E-01 | 3.74E-01 |
| C6       | -0.3192 | 3.10E-10 | 8.31E-09 |
| C7orf10  | -0.1417 | 6.26E-03 | 1.98E-02 |
| C7orf11  | -0.0242 | 6.42E-01 | 7.48E-01 |
| C7orf13  | 0.1458  | 4.90E-03 | 1.62E-02 |
| C7orf16  | -0.0735 | 1.58E-01 | 2.64E-01 |
| C7orf23  | 0.1532  | 3.09E-03 | 1.11E-02 |
| C7orf25  | -0.0024 | 9.63E-01 | 9.77E-01 |
| C7orf26  | 0.1586  | 2.19E-03 | 8.30E-03 |
| C7orf27  | 0.1030  | 4.73E-02 | 1.03E-01 |
| C7orf28A | 0.2141  | 3.21E-05 | 2.32E-04 |
| C7orf28B | 0.0941  | 7.03E-02 | 1.41E-01 |
| C7orf29  | 0.1462  | 4.76E-03 | 1.58E-02 |
| C7orf30  | -0.0621 | 2.33E-01 | 3.56E-01 |
| C7orf31  | 0.1314  | 1.13E-02 | 3.23E-02 |
| C7orf33  | -0.0200 | 7.00E-01 | 7.94E-01 |
| C7orf34  | 0.1270  | 1.44E-02 | 3.93E-02 |
| C7orf36  | 0.3049  | 2.01E-09 | 4.46E-08 |
| C7orf40  | 0.1979  | 1.25E-04 | 7.38E-04 |

|          |         |          |          |
|----------|---------|----------|----------|
| C7orf41  | 0.0022  | 9.67E-01 | 9.79E-01 |
| C7orf42  | -0.1158 | 2.57E-02 | 6.29E-02 |
| C7orf43  | -0.0596 | 2.52E-01 | 3.77E-01 |
| C7orf44  | 0.1820  | 4.27E-04 | 2.08E-03 |
| C7orf45  | 0.0184  | 7.23E-01 | 8.12E-01 |
| C7orf46  | 0.0261  | 6.17E-01 | 7.26E-01 |
| C7orf47  | 0.0988  | 5.73E-02 | 1.20E-01 |
| C7orf49  | 0.1457  | 4.92E-03 | 1.63E-02 |
| C7orf4   | 0.0714  | 1.70E-01 | 2.79E-01 |
| C7orf50  | 0.0713  | 1.71E-01 | 2.80E-01 |
| C7orf51  | 0.1574  | 2.36E-03 | 8.84E-03 |
| C7orf52  | -0.0465 | 3.72E-01 | 5.05E-01 |
| C7orf53  | 0.0474  | 3.62E-01 | 4.95E-01 |
| C7orf54  | 0.0852  | 1.01E-01 | 1.88E-01 |
| C7orf55  | -0.1928 | 1.87E-04 | 1.04E-03 |
| C7orf57  | 0.0701  | 1.78E-01 | 2.89E-01 |
| C7orf58  | -0.3445 | 8.89E-12 | 3.24E-10 |
| C7orf59  | -0.0236 | 6.50E-01 | 7.54E-01 |
| C7orf60  | 0.0996  | 5.52E-02 | 1.16E-01 |
| C7orf61  | 0.0637  | 2.21E-01 | 3.41E-01 |
| C7orf63  | -0.1675 | 1.20E-03 | 5.02E-03 |
| C7orf64  | 0.0574  | 2.70E-01 | 3.98E-01 |
| C7orf65  | 0.2324  | 6.11E-06 | 5.50E-05 |
| C7orf66  | 0.1323  | 1.07E-02 | 3.09E-02 |
| C7orf68  | 0.0905  | 8.19E-02 | 1.59E-01 |
| C7orf69  | 0.1627  | 1.67E-03 | 6.63E-03 |
| C7orf70  | 0.2437  | 2.03E-06 | 2.12E-05 |
| C7orf71  | 0.1408  | 6.60E-03 | 2.08E-02 |
| C7orf72  | 0.0359  | 4.91E-01 | 6.18E-01 |
| C7       | -0.2118 | 3.92E-05 | 2.75E-04 |
| C8A      | -0.2746 | 7.68E-08 | 1.15E-06 |
| C8B      | -0.1572 | 2.39E-03 | 8.92E-03 |
| C8G      | -0.1455 | 4.98E-03 | 1.64E-02 |
| C8ORFK29 | 0.1778  | 5.82E-04 | 2.70E-03 |
| C8orf12  | 0.0243  | 6.41E-01 | 7.47E-01 |
| C8orf22  | 0.0574  | 2.70E-01 | 3.98E-01 |
| C8orf30A | -0.0176 | 7.35E-01 | 8.21E-01 |
| C8orf31  | -0.0196 | 7.07E-01 | 7.99E-01 |
| C8orf33  | 0.1073  | 3.88E-02 | 8.80E-02 |
| C8orf34  | -0.0306 | 5.57E-01 | 6.76E-01 |
| C8orf37  | -0.0198 | 7.04E-01 | 7.96E-01 |
| C8orf38  | 0.0998  | 5.48E-02 | 1.16E-01 |
| C8orf39  | 0.1613  | 1.83E-03 | 7.14E-03 |
| C8orf40  | -0.0881 | 9.01E-02 | 1.71E-01 |

|          |         |          |          |
|----------|---------|----------|----------|
| C8orf41  | 0.0891  | 8.66E-02 | 1.66E-01 |
| C8orf42  | 0.1121  | 3.08E-02 | 7.30E-02 |
| C8orf44  | 0.1752  | 7.00E-04 | 3.17E-03 |
| C8orf45  | 0.1328  | 1.04E-02 | 3.03E-02 |
| C8orf46  | -0.1345 | 9.51E-03 | 2.81E-02 |
| C8orf47  | 0.1121  | 3.08E-02 | 7.30E-02 |
| C8orf48  | 0.2384  | 3.43E-06 | 3.34E-05 |
| C8orf4   | -0.1249 | 1.61E-02 | 4.30E-02 |
| C8orf51  | 0.1580  | 2.27E-03 | 8.54E-03 |
| C8orf55  | -0.0969 | 6.22E-02 | 1.28E-01 |
| C8orf56  | -0.0035 | 9.47E-01 | 9.67E-01 |
| C8orf58  | -0.1130 | 2.96E-02 | 7.06E-02 |
| C8orf59  | 0.1438  | 5.52E-03 | 1.79E-02 |
| C8orf71  | 0.1017  | 5.02E-02 | 1.08E-01 |
| C8orf73  | 0.0780  | 1.34E-01 | 2.32E-01 |
| C8orf74  | 0.0318  | 5.41E-01 | 6.62E-01 |
| C8orf75  | -0.0529 | 3.09E-01 | 4.39E-01 |
| C8orf76  | 0.0704  | 1.76E-01 | 2.87E-01 |
| C8orf77  | 0.2586  | 4.41E-07 | 5.47E-06 |
| C8orf79  | 0.0531  | 3.08E-01 | 4.37E-01 |
| C8orf80  | -0.1865 | 3.04E-04 | 1.58E-03 |
| C8orf83  | -0.2034 | 7.94E-05 | 5.01E-04 |
| C8orf84  | 0.0995  | 5.55E-02 | 1.17E-01 |
| C8orf85  | 0.0726  | 1.63E-01 | 2.70E-01 |
| C8orf86  | -0.0140 | 7.88E-01 | 8.59E-01 |
| C9orf100 | 0.4193  | 3.12E-17 | 3.53E-15 |
| C9orf102 | -0.1429 | 5.83E-03 | 1.87E-02 |
| C9orf103 | -0.1379 | 7.80E-03 | 2.38E-02 |
| C9orf106 | 0.0833  | 1.09E-01 | 1.99E-01 |
| C9orf109 | 0.2515  | 9.20E-07 | 1.05E-05 |
| C9orf110 | 0.2152  | 2.92E-05 | 2.14E-04 |
| C9orf114 | 0.1276  | 1.39E-02 | 3.84E-02 |
| C9orf116 | -0.0787 | 1.30E-01 | 2.28E-01 |
| C9orf117 | 0.2447  | 1.84E-06 | 1.95E-05 |
| C9orf119 | 0.0435  | 4.03E-01 | 5.36E-01 |
| C9orf11  | 0.1039  | 4.55E-02 | 9.99E-02 |
| C9orf122 | 0.1847  | 3.48E-04 | 1.77E-03 |
| C9orf123 | -0.0779 | 1.34E-01 | 2.33E-01 |
| C9orf125 | 0.1854  | 3.30E-04 | 1.69E-03 |
| C9orf128 | 0.0573  | 2.71E-01 | 3.99E-01 |
| C9orf129 | -0.0740 | 1.55E-01 | 2.60E-01 |
| C9orf130 | -0.0735 | 1.58E-01 | 2.64E-01 |
| C9orf131 | -0.0619 | 2.34E-01 | 3.58E-01 |
| C9orf135 | 0.0549  | 2.92E-01 | 4.21E-01 |

|           |         |          |          |
|-----------|---------|----------|----------|
| C9orf139  | 0.0266  | 6.10E-01 | 7.21E-01 |
| C9orf140  | 0.3896  | 6.82E-15 | 4.56E-13 |
| C9orf142  | 0.1569  | 2.45E-03 | 9.10E-03 |
| C9orf144B | 0.0206  | 6.93E-01 | 7.88E-01 |
| C9orf144  | 0.0297  | 5.68E-01 | 6.86E-01 |
| C9orf150  | -0.1536 | 3.01E-03 | 1.08E-02 |
| C9orf152  | 0.1052  | 4.28E-02 | 9.51E-02 |
| C9orf153  | 0.0356  | 4.94E-01 | 6.21E-01 |
| C9orf156  | 0.2186  | 2.16E-05 | 1.65E-04 |
| C9orf163  | 0.1821  | 4.23E-04 | 2.07E-03 |
| C9orf167  | 0.0578  | 2.67E-01 | 3.94E-01 |
| C9orf169  | -0.0306 | 5.57E-01 | 6.76E-01 |
| C9orf16   | -0.0086 | 8.70E-01 | 9.16E-01 |
| C9orf170  | 0.1418  | 6.21E-03 | 1.97E-02 |
| C9orf171  | -0.0110 | 8.33E-01 | 8.91E-01 |
| C9orf172  | 0.1641  | 1.52E-03 | 6.11E-03 |
| C9orf173  | -0.0125 | 8.10E-01 | 8.75E-01 |
| C9orf21   | 0.0590  | 2.57E-01 | 3.83E-01 |
| C9orf23   | -0.0706 | 1.75E-01 | 2.85E-01 |
| C9orf24   | -0.0145 | 7.80E-01 | 8.54E-01 |
| C9orf25   | 0.2756  | 6.86E-08 | 1.04E-06 |
| C9orf30   | 0.2992  | 4.15E-09 | 8.50E-08 |
| C9orf37   | 0.1621  | 1.74E-03 | 6.84E-03 |
| C9orf3    | -0.0308 | 5.54E-01 | 6.73E-01 |
| C9orf40   | 0.2006  | 1.00E-04 | 6.09E-04 |
| C9orf41   | -0.0697 | 1.81E-01 | 2.93E-01 |
| C9orf43   | 0.0192  | 7.12E-01 | 8.03E-01 |
| C9orf44   | -0.0591 | 2.56E-01 | 3.82E-01 |
| C9orf45   | 0.3583  | 1.12E-12 | 4.97E-11 |
| C9orf46   | 0.0095  | 8.55E-01 | 9.06E-01 |
| C9orf47   | 0.0476  | 3.61E-01 | 4.93E-01 |
| C9orf4    | 0.0779  | 1.34E-01 | 2.32E-01 |
| C9orf50   | 0.0420  | 4.20E-01 | 5.52E-01 |
| C9orf53   | 0.2194  | 2.00E-05 | 1.54E-04 |
| C9orf57   | -0.0301 | 5.64E-01 | 6.82E-01 |
| C9orf5    | -0.0642 | 2.17E-01 | 3.37E-01 |
| C9orf64   | 0.1308  | 1.17E-02 | 3.32E-02 |
| C9orf66   | 0.0464  | 3.73E-01 | 5.06E-01 |
| C9orf68   | 0.0188  | 7.18E-01 | 8.09E-01 |
| C9orf69   | 0.2118  | 3.90E-05 | 2.74E-04 |
| C9orf6    | 0.2158  | 2.78E-05 | 2.05E-04 |
| C9orf70   | 0.0555  | 2.86E-01 | 4.15E-01 |
| C9orf71   | -0.1998 | 1.06E-04 | 6.42E-04 |
| C9orf72   | 0.0942  | 7.00E-02 | 1.40E-01 |

|         |         |          |          |
|---------|---------|----------|----------|
| C9orf78 | -0.1677 | 1.19E-03 | 4.97E-03 |
| C9orf79 | 0.0965  | 6.34E-02 | 1.30E-01 |
| C9orf7  | -0.0334 | 5.21E-01 | 6.45E-01 |
| C9orf80 | 0.1413  | 6.40E-03 | 2.02E-02 |
| C9orf82 | -0.1084 | 3.68E-02 | 8.44E-02 |
| C9orf84 | 0.0720  | 1.66E-01 | 2.74E-01 |
| C9orf85 | 0.0131  | 8.01E-01 | 8.69E-01 |
| C9orf86 | 0.2954  | 6.64E-09 | 1.29E-07 |
| C9orf89 | 0.1246  | 1.63E-02 | 4.35E-02 |
| C9orf91 | -0.1285 | 1.32E-02 | 3.68E-02 |
| C9orf93 | 0.0371  | 4.76E-01 | 6.05E-01 |
| C9orf95 | -0.1231 | 1.77E-02 | 4.66E-02 |
| C9orf96 | 0.2079  | 5.46E-05 | 3.65E-04 |
| C9orf98 | 0.0437  | 4.01E-01 | 5.34E-01 |
| C9orf9  | 0.0343  | 5.10E-01 | 6.35E-01 |
| C9      | -0.1388 | 7.43E-03 | 2.29E-02 |
| CA10    | 0.0195  | 7.09E-01 | 8.01E-01 |
| CA11    | 0.0434  | 4.05E-01 | 5.38E-01 |
| CA12    | 0.0179  | 7.31E-01 | 8.18E-01 |
| CA13    | -0.1442 | 5.38E-03 | 1.76E-02 |
| CA14    | -0.0650 | 2.12E-01 | 3.31E-01 |
| CA1     | 0.0305  | 5.59E-01 | 6.77E-01 |
| CA2     | -0.1803 | 4.84E-04 | 2.31E-03 |
| CA3     | -0.0438 | 4.00E-01 | 5.33E-01 |
| CA4     | -0.1352 | 9.14E-03 | 2.72E-02 |
| CA5A    | -0.2877 | 1.67E-08 | 2.95E-07 |
| CA5BP   | 0.1798  | 5.03E-04 | 2.39E-03 |
| CA5B    | -0.0944 | 6.94E-02 | 1.39E-01 |
| CA6     | 0.0396  | 4.47E-01 | 5.79E-01 |
| CA7     | 0.0641  | 2.18E-01 | 3.38E-01 |
| CA8     | 0.0611  | 2.40E-01 | 3.64E-01 |
| CA9     | 0.1827  | 4.05E-04 | 2.00E-03 |
| CAB39L  | -0.1356 | 8.91E-03 | 2.66E-02 |
| CAB39   | -0.0404 | 4.38E-01 | 5.69E-01 |
| CABC1   | -0.0314 | 5.47E-01 | 6.67E-01 |
| CABIN1  | 0.1364  | 8.50E-03 | 2.56E-02 |
| CABLES1 | -0.0818 | 1.16E-01 | 2.08E-01 |
| CABLES2 | 0.3105  | 9.84E-10 | 2.33E-08 |
| CABP1   | -0.0374 | 4.73E-01 | 6.02E-01 |
| CABP2   | -0.0725 | 1.64E-01 | 2.71E-01 |
| CABP4   | -0.0249 | 6.33E-01 | 7.40E-01 |
| CABP5   | 0.0301  | 5.64E-01 | 6.82E-01 |
| CABP7   | 0.1735  | 7.89E-04 | 3.51E-03 |
| CABYR   | 0.2682  | 1.56E-07 | 2.17E-06 |



|          |         |          |          |
|----------|---------|----------|----------|
| CACHD1   | -0.0307 | 5.56E-01 | 6.75E-01 |
| CACNA1A  | 0.0075  | 8.86E-01 | 9.27E-01 |
| CACNA1B  | 0.1301  | 1.22E-02 | 3.43E-02 |
| CACNA1C  | -0.1570 | 2.43E-03 | 9.04E-03 |
| CACNA1D  | 0.0385  | 4.60E-01 | 5.90E-01 |
| CACNA1E  | 0.0540  | 2.99E-01 | 4.29E-01 |
| CACNA1F  | 0.1904  | 2.25E-04 | 1.22E-03 |
| CACNA1G  | 0.1573  | 2.37E-03 | 8.87E-03 |
| CACNA1H  | 0.0152  | 7.71E-01 | 8.46E-01 |
| CACNA1I  | 0.0086  | 8.68E-01 | 9.15E-01 |
| CACNA1S  | 0.0207  | 6.91E-01 | 7.86E-01 |
| CACNA2D1 | -0.1419 | 6.17E-03 | 1.96E-02 |
| CACNA2D2 | 0.0920  | 7.69E-02 | 1.51E-01 |
| CACNA2D3 | -0.0369 | 4.79E-01 | 6.08E-01 |
| CACNA2D4 | 0.1069  | 3.96E-02 | 8.95E-02 |
| CACNB1   | 0.1996  | 1.09E-04 | 6.55E-04 |
| CACNB2   | 0.0966  | 6.30E-02 | 1.29E-01 |
| CACNB3   | 0.0672  | 1.96E-01 | 3.12E-01 |
| CACNB4   | -0.0109 | 8.35E-01 | 8.92E-01 |
| CACNG1   | 0.1150  | 2.67E-02 | 6.50E-02 |
| CACNG2   | 0.0723  | 1.65E-01 | 2.73E-01 |
| CACNG3   | 0.0892  | 8.62E-02 | 1.65E-01 |
| CACNG4   | 0.2285  | 8.81E-06 | 7.52E-05 |
| CACNG5   | 0.0860  | 9.82E-02 | 1.83E-01 |
| CACNG6   | 0.0644  | 2.16E-01 | 3.36E-01 |
| CACNG7   | 0.0414  | 4.27E-01 | 5.59E-01 |
| CACNG8   | -0.0076 | 8.83E-01 | 9.25E-01 |
| CACYBP   | 0.5053  | 1.94E-25 | 1.10E-22 |
| CADM1    | -0.1465 | 4.68E-03 | 1.56E-02 |
| CADM2    | 0.0257  | 6.22E-01 | 7.31E-01 |
| CADM3    | -0.0300 | 5.64E-01 | 6.82E-01 |
| CADM4    | 0.0030  | 9.55E-01 | 9.72E-01 |
| CADPS2   | -0.0727 | 1.62E-01 | 2.69E-01 |
| CADPS    | 0.1047  | 4.40E-02 | 9.71E-02 |
| CAD      | 0.3216  | 2.26E-10 | 6.22E-09 |
| CAGE1    | 0.1508  | 3.59E-03 | 1.26E-02 |
| CALB1    | 0.0588  | 2.58E-01 | 3.84E-01 |
| CALB2    | 0.0447  | 3.91E-01 | 5.24E-01 |
| CALCA    | -0.0693 | 1.83E-01 | 2.96E-01 |
| CALCB    | 0.0494  | 3.42E-01 | 4.74E-01 |
| CALCOCO1 | -0.0277 | 5.95E-01 | 7.09E-01 |
| CALCOCO2 | -0.0083 | 8.73E-01 | 9.18E-01 |
| CALCRL   | -0.1998 | 1.06E-04 | 6.41E-04 |
| CALCR    | 0.1637  | 1.56E-03 | 6.26E-03 |

|           |         |          |          |
|-----------|---------|----------|----------|
| CALD1     | -0.3473 | 5.93E-12 | 2.26E-10 |
| CALHM1    | 0.0660  | 2.04E-01 | 3.22E-01 |
| CALHM2    | -0.1013 | 5.12E-02 | 1.10E-01 |
| CALHM3    | 0.1524  | 3.25E-03 | 1.15E-02 |
| CALM1     | -0.1477 | 4.35E-03 | 1.47E-02 |
| CALM2     | 0.1067  | 3.99E-02 | 9.00E-02 |
| CALM3     | 0.0770  | 1.39E-01 | 2.39E-01 |
| CALML3    | -0.0640 | 2.19E-01 | 3.39E-01 |
| CALML4    | -0.0653 | 2.09E-01 | 3.28E-01 |
| CALML5    | 0.0780  | 1.34E-01 | 2.32E-01 |
| CALML6    | 0.1951  | 1.56E-04 | 8.93E-04 |
| CALN1     | -0.0354 | 4.96E-01 | 6.22E-01 |
| CALR3     | 0.0717  | 1.68E-01 | 2.77E-01 |
| CALR      | -0.0304 | 5.59E-01 | 6.78E-01 |
| CALU      | 0.0226  | 6.64E-01 | 7.64E-01 |
| CALY      | 0.0727  | 1.62E-01 | 2.69E-01 |
| CAMK1D    | -0.0861 | 9.77E-02 | 1.83E-01 |
| CAMK1G    | -0.0174 | 7.39E-01 | 8.23E-01 |
| CAMK1     | 0.0766  | 1.41E-01 | 2.41E-01 |
| CAMK2A    | -0.0048 | 9.27E-01 | 9.54E-01 |
| CAMK2B    | -0.1519 | 3.36E-03 | 1.19E-02 |
| CAMK2D    | -0.0570 | 2.73E-01 | 4.01E-01 |
| CAMK2G    | 0.0396  | 4.47E-01 | 5.78E-01 |
| CAMK2N1   | 0.0267  | 6.08E-01 | 7.20E-01 |
| CAMK2N2   | -0.0096 | 8.54E-01 | 9.05E-01 |
| CAMK4     | -0.1453 | 5.05E-03 | 1.66E-02 |
| CAMKK1    | -0.0300 | 5.65E-01 | 6.83E-01 |
| CAMKK2    | 0.0171  | 7.43E-01 | 8.27E-01 |
| CAMKV     | 0.2212  | 1.71E-05 | 1.34E-04 |
| CAMLG     | 0.0171  | 7.43E-01 | 8.26E-01 |
| CAMP      | -0.0488 | 3.49E-01 | 4.81E-01 |
| CAMSAP1L1 | 0.2197  | 1.95E-05 | 1.51E-04 |
| CAMSAP1   | 0.1702  | 9.97E-04 | 4.29E-03 |
| CAMTA1    | -0.0504 | 3.33E-01 | 4.64E-01 |
| CAMTA2    | -0.1912 | 2.12E-04 | 1.16E-03 |
| CAND1     | 0.1166  | 2.47E-02 | 6.09E-02 |
| CAND2     | 0.0788  | 1.30E-01 | 2.27E-01 |
| CANT1     | 0.3538  | 2.23E-12 | 9.25E-11 |
| CANX      | 0.0055  | 9.16E-01 | 9.47E-01 |
| CAP1      | 0.0418  | 4.22E-01 | 5.55E-01 |
| CAP2      | 0.0696  | 1.81E-01 | 2.93E-01 |
| CAPG      | 0.1033  | 4.68E-02 | 1.02E-01 |
| CAPN10    | 0.3136  | 6.52E-10 | 1.61E-08 |
| CAPN11    | -0.1956 | 1.49E-04 | 8.60E-04 |

|         |         |          |          |
|---------|---------|----------|----------|
| CAPN12  | 0.2337  | 5.38E-06 | 4.93E-05 |
| CAPN13  | 0.1056  | 4.20E-02 | 9.36E-02 |
| CAPN14  | 0.1328  | 1.04E-02 | 3.03E-02 |
| CAPN1   | 0.0171  | 7.42E-01 | 8.26E-01 |
| CAPN2   | 0.0262  | 6.16E-01 | 7.25E-01 |
| CAPN3   | -0.0620 | 2.33E-01 | 3.56E-01 |
| CAPN5   | -0.0006 | 9.90E-01 | 9.94E-01 |
| CAPN6   | 0.1525  | 3.24E-03 | 1.15E-02 |
| CAPN7   | -0.0316 | 5.43E-01 | 6.64E-01 |
| CAPN8   | 0.1107  | 3.31E-02 | 7.75E-02 |
| CAPN9   | 0.1771  | 6.10E-04 | 2.81E-03 |
| CAPNS1  | 0.0088  | 8.66E-01 | 9.13E-01 |
| CAPNS2  | 0.0047  | 9.28E-01 | 9.54E-01 |
| CAPRIN1 | 0.2010  | 9.67E-05 | 5.92E-04 |
| CAPRIN2 | 0.1680  | 1.16E-03 | 4.87E-03 |
| CAPS2   | -0.0156 | 7.64E-01 | 8.41E-01 |
| CAPSL   | 0.1090  | 3.59E-02 | 8.26E-02 |
| CAPS    | 0.2075  | 5.64E-05 | 3.76E-04 |
| CAPZA1  | 0.1139  | 2.82E-02 | 6.80E-02 |
| CAPZA2  | -0.1308 | 1.17E-02 | 3.31E-02 |
| CAPZA3  | -0.1122 | 3.08E-02 | 7.29E-02 |
| CAPZB   | -0.0451 | 3.86E-01 | 5.19E-01 |
| CARD10  | 0.1821  | 4.23E-04 | 2.07E-03 |
| CARD11  | 0.0083  | 8.73E-01 | 9.18E-01 |
| CARD14  | 0.2447  | 1.85E-06 | 1.95E-05 |
| CARD16  | -0.0404 | 4.38E-01 | 5.69E-01 |
| CARD17  | 0.0802  | 1.23E-01 | 2.18E-01 |
| CARD18  | 0.1595  | 2.06E-03 | 7.89E-03 |
| CARD6   | -0.0254 | 6.26E-01 | 7.35E-01 |
| CARD8   | 0.0557  | 2.84E-01 | 4.13E-01 |
| CARD9   | 0.1059  | 4.15E-02 | 9.28E-02 |
| CARHSP1 | 0.1198  | 2.10E-02 | 5.34E-02 |
| CARKD   | -0.0981 | 5.90E-02 | 1.22E-01 |
| CARM1   | 0.0008  | 9.87E-01 | 9.92E-01 |
| CARNS1  | 0.0258  | 6.20E-01 | 7.29E-01 |
| CARS2   | 0.0992  | 5.63E-02 | 1.18E-01 |
| CARS    | -0.0642 | 2.17E-01 | 3.37E-01 |
| CARTPT  | 0.0026  | 9.61E-01 | 9.75E-01 |
| CASC1   | 0.0886  | 8.82E-02 | 1.68E-01 |
| CASC2   | 0.0925  | 7.51E-02 | 1.48E-01 |
| CASC3   | 0.3322  | 5.26E-11 | 1.65E-09 |
| CASC4   | -0.1729 | 8.26E-04 | 3.64E-03 |
| CASC5   | 0.1198  | 2.10E-02 | 5.35E-02 |
| CASD1   | -0.0266 | 6.10E-01 | 7.21E-01 |

|            |         |          |          |
|------------|---------|----------|----------|
| CASKIN1    | 0.2096  | 4.71E-05 | 3.21E-04 |
| CASKIN2    | 0.0419  | 4.21E-01 | 5.54E-01 |
| CASK       | -0.0092 | 8.60E-01 | 9.09E-01 |
| CASP10     | 0.0028  | 9.58E-01 | 9.74E-01 |
| CASP12     | -0.0462 | 3.75E-01 | 5.08E-01 |
| CASP14     | 0.0059  | 9.10E-01 | 9.43E-01 |
| CASP1      | -0.0347 | 5.05E-01 | 6.30E-01 |
| CASP2      | 0.3156  | 5.06E-10 | 1.28E-08 |
| CASP3      | 0.0612  | 2.40E-01 | 3.64E-01 |
| CASP4      | 0.0351  | 5.00E-01 | 6.26E-01 |
| CASP5      | 0.0734  | 1.58E-01 | 2.64E-01 |
| CASP6      | 0.0669  | 1.98E-01 | 3.15E-01 |
| CASP7      | -0.0091 | 8.62E-01 | 9.11E-01 |
| CASP8AP2   | 0.2697  | 1.33E-07 | 1.88E-06 |
| CASP8      | 0.0742  | 1.54E-01 | 2.59E-01 |
| CASP9      | 0.0242  | 6.42E-01 | 7.47E-01 |
| CASQ1      | 0.1413  | 6.42E-03 | 2.03E-02 |
| CASQ2      | -0.2246 | 1.26E-05 | 1.03E-04 |
| CASR       | -0.0223 | 6.69E-01 | 7.69E-01 |
| CASS4      | -0.2601 | 3.77E-07 | 4.78E-06 |
| CAST       | -0.1794 | 5.17E-04 | 2.45E-03 |
| CASZ1      | 0.0869  | 9.47E-02 | 1.78E-01 |
| CATSPER1   | 0.1131  | 2.95E-02 | 7.04E-02 |
| CATSPER2P1 | -0.0967 | 6.27E-02 | 1.29E-01 |
| CATSPER2   | 0.1368  | 8.34E-03 | 2.52E-02 |
| CATSPER3   | 0.1130  | 2.95E-02 | 7.05E-02 |
| CATSPER4   | 0.0577  | 2.68E-01 | 3.96E-01 |
| CATSPERB   | 0.0469  | 3.68E-01 | 5.00E-01 |
| CATSPERG   | -0.0650 | 2.12E-01 | 3.31E-01 |
| CAT        | -0.3001 | 3.68E-09 | 7.62E-08 |
| CAV1       | -0.0610 | 2.41E-01 | 3.66E-01 |
| CAV2       | -0.1070 | 3.93E-02 | 8.89E-02 |
| CAV3       | -0.0665 | 2.01E-01 | 3.18E-01 |
| CBARA1     | -0.1726 | 8.44E-04 | 3.71E-03 |
| CBFA2T2    | 0.4047  | 4.70E-16 | 4.07E-14 |
| CBFA2T3    | -0.2623 | 2.97E-07 | 3.88E-06 |
| CBFB       | 0.1221  | 1.87E-02 | 4.86E-02 |
| CBLB       | -0.0238 | 6.48E-01 | 7.52E-01 |
| CBLC       | 0.0419  | 4.21E-01 | 5.54E-01 |
| CBLL1      | 0.0694  | 1.82E-01 | 2.94E-01 |
| CBLN1      | -0.1655 | 1.38E-03 | 5.63E-03 |
| CBLN2      | 0.0020  | 9.70E-01 | 9.81E-01 |
| CBLN3      | -0.1316 | 1.12E-02 | 3.19E-02 |
| CBLN4      | -0.0857 | 9.94E-02 | 1.85E-01 |

|          |         |          |          |
|----------|---------|----------|----------|
| CBL      | 0.0997  | 5.49E-02 | 1.16E-01 |
| CBR1     | -0.1316 | 1.12E-02 | 3.20E-02 |
| CBR3     | 0.1837  | 3.75E-04 | 1.88E-03 |
| CBR4     | -0.4453 | 1.82E-19 | 3.93E-17 |
| CBS      | -0.1808 | 4.64E-04 | 2.24E-03 |
| CBWD1    | 0.0276  | 5.97E-01 | 7.10E-01 |
| CBWD2    | 0.0544  | 2.96E-01 | 4.25E-01 |
| CBWD3    | 0.0454  | 3.83E-01 | 5.16E-01 |
| CBWD5    | 0.1129  | 2.97E-02 | 7.08E-02 |
| CBWD6    | 0.0807  | 1.21E-01 | 2.15E-01 |
| CBX1     | 0.4220  | 1.89E-17 | 2.31E-15 |
| CBX2     | 0.3016  | 3.08E-09 | 6.46E-08 |
| CBX3     | 0.3132  | 6.89E-10 | 1.68E-08 |
| CBX4     | 0.1883  | 2.64E-04 | 1.39E-03 |
| CBX5     | 0.2157  | 2.79E-05 | 2.06E-04 |
| CBX6     | 0.0432  | 4.06E-01 | 5.39E-01 |
| CBX7     | -0.1146 | 2.72E-02 | 6.61E-02 |
| CBX8     | 0.2183  | 2.22E-05 | 1.69E-04 |
| CBY1     | 0.0843  | 1.05E-01 | 1.93E-01 |
| CC2D1A   | -0.1110 | 3.26E-02 | 7.65E-02 |
| CC2D1B   | 0.2104  | 4.40E-05 | 3.04E-04 |
| CC2D2A   | 0.0928  | 7.43E-02 | 1.47E-01 |
| CC2D2B   | -0.1017 | 5.03E-02 | 1.08E-01 |
| CCAR1    | 0.1688  | 1.10E-03 | 4.67E-03 |
| CCBE1    | -0.2010 | 9.65E-05 | 5.92E-04 |
| CCBL1    | 0.0939  | 7.08E-02 | 1.42E-01 |
| CCBL2    | -0.1538 | 2.98E-03 | 1.07E-02 |
| CCBP2    | -0.2365 | 4.13E-06 | 3.94E-05 |
| CCDC101  | 0.0082  | 8.75E-01 | 9.19E-01 |
| CCDC102A | 0.0450  | 3.88E-01 | 5.21E-01 |
| CCDC102B | -0.0737 | 1.56E-01 | 2.62E-01 |
| CCDC103  | 0.1406  | 6.66E-03 | 2.09E-02 |
| CCDC104  | 0.1008  | 5.25E-02 | 1.12E-01 |
| CCDC106  | -0.1955 | 1.51E-04 | 8.68E-04 |
| CCDC107  | -0.0230 | 6.59E-01 | 7.60E-01 |
| CCDC108  | 0.1211  | 1.97E-02 | 5.07E-02 |
| CCDC109A | 0.0988  | 5.72E-02 | 1.20E-01 |
| CCDC109B | 0.1787  | 5.45E-04 | 2.56E-03 |
| CCDC110  | 0.0486  | 3.51E-01 | 4.83E-01 |
| CCDC111  | 0.0148  | 7.76E-01 | 8.50E-01 |
| CCDC112  | 0.1737  | 7.81E-04 | 3.48E-03 |
| CCDC113  | -0.0884 | 8.89E-02 | 1.69E-01 |
| CCDC114  | 0.1509  | 3.57E-03 | 1.25E-02 |
| CCDC115  | -0.0292 | 5.75E-01 | 6.92E-01 |

|           |         |          |          |
|-----------|---------|----------|----------|
| CCDC116   | 0.0273  | 6.00E-01 | 7.13E-01 |
| CCDC117   | 0.1362  | 8.62E-03 | 2.59E-02 |
| CCDC11    | 0.0978  | 5.98E-02 | 1.24E-01 |
| CCDC120   | 0.1998  | 1.07E-04 | 6.43E-04 |
| CCDC121   | 0.0468  | 3.69E-01 | 5.02E-01 |
| CCDC122   | 0.1272  | 1.42E-02 | 3.90E-02 |
| CCDC123   | 0.3096  | 1.11E-09 | 2.60E-08 |
| CCDC124   | -0.0493 | 3.44E-01 | 4.76E-01 |
| CCDC125   | -0.0620 | 2.33E-01 | 3.56E-01 |
| CCDC126   | -0.0263 | 6.14E-01 | 7.24E-01 |
| CCDC127   | 0.0945  | 6.92E-02 | 1.39E-01 |
| CCDC129   | -0.0209 | 6.88E-01 | 7.84E-01 |
| CCDC12    | 0.0652  | 2.10E-01 | 3.29E-01 |
| CCDC130   | 0.1622  | 1.72E-03 | 6.80E-03 |
| CCDC132   | 0.0374  | 4.73E-01 | 6.02E-01 |
| CCDC134   | 0.0602  | 2.48E-01 | 3.72E-01 |
| CCDC135   | 0.0285  | 5.85E-01 | 7.00E-01 |
| CCDC136   | 0.0925  | 7.51E-02 | 1.48E-01 |
| CCDC137   | 0.3437  | 1.00E-11 | 3.55E-10 |
| CCDC138   | 0.1752  | 7.01E-04 | 3.17E-03 |
| CCDC13    | 0.0470  | 3.66E-01 | 4.99E-01 |
| CCDC140   | 0.1033  | 4.67E-02 | 1.02E-01 |
| CCDC141   | 0.0306  | 5.57E-01 | 6.76E-01 |
| CCDC142   | 0.3103  | 1.01E-09 | 2.38E-08 |
| CCDC144A  | 0.0001  | 9.98E-01 | 9.99E-01 |
| CCDC144B  | -0.0070 | 8.92E-01 | 9.31E-01 |
| CCDC144C  | 0.1325  | 1.06E-02 | 3.06E-02 |
| CCDC144NL | 0.1081  | 3.74E-02 | 8.56E-02 |
| CCDC146   | -0.1894 | 2.44E-04 | 1.31E-03 |
| CCDC147   | -0.1541 | 2.92E-03 | 1.06E-02 |
| CCDC148   | 0.0294  | 5.73E-01 | 6.90E-01 |
| CCDC149   | 0.1101  | 3.40E-02 | 7.92E-02 |
| CCDC14    | 0.3375  | 2.47E-11 | 8.23E-10 |
| CCDC150   | 0.1759  | 6.65E-04 | 3.03E-03 |
| CCDC151   | 0.0129  | 8.04E-01 | 8.71E-01 |
| CCDC152   | -0.0811 | 1.19E-01 | 2.13E-01 |
| CCDC153   | 0.0619  | 2.35E-01 | 3.58E-01 |
| CCDC154   | 0.3139  | 6.31E-10 | 1.56E-08 |
| CCDC155   | 0.1739  | 7.69E-04 | 3.43E-03 |
| CCDC157   | 0.0637  | 2.21E-01 | 3.42E-01 |
| CCDC158   | -0.0872 | 9.35E-02 | 1.76E-01 |
| CCDC159   | -0.0736 | 1.57E-01 | 2.63E-01 |
| CCDC15    | 0.2618  | 3.14E-07 | 4.06E-06 |
| CCDC160   | -0.0035 | 9.47E-01 | 9.67E-01 |

|          |         |          |          |
|----------|---------|----------|----------|
| CCDC163P | 0.1327  | 1.05E-02 | 3.05E-02 |
| CCDC17   | 0.0146  | 7.79E-01 | 8.52E-01 |
| CCDC18   | 0.2268  | 1.03E-05 | 8.63E-05 |
| CCDC19   | 0.1766  | 6.33E-04 | 2.91E-03 |
| CCDC21   | 0.2387  | 3.33E-06 | 3.25E-05 |
| CCDC22   | 0.1073  | 3.88E-02 | 8.80E-02 |
| CCDC23   | 0.1203  | 2.05E-02 | 5.23E-02 |
| CCDC24   | 0.0714  | 1.70E-01 | 2.79E-01 |
| CCDC25   | -0.1968 | 1.36E-04 | 7.92E-04 |
| CCDC27   | 0.0027  | 9.58E-01 | 9.74E-01 |
| CCDC28A  | -0.0499 | 3.38E-01 | 4.69E-01 |
| CCDC28B  | 0.1085  | 3.68E-02 | 8.44E-02 |
| CCDC30   | 0.0911  | 7.98E-02 | 1.55E-01 |
| CCDC33   | -0.0433 | 4.05E-01 | 5.39E-01 |
| CCDC34   | 0.2311  | 6.86E-06 | 6.08E-05 |
| CCDC36   | 0.0475  | 3.61E-01 | 4.94E-01 |
| CCDC37   | 0.0656  | 2.07E-01 | 3.25E-01 |
| CCDC38   | 0.0427  | 4.12E-01 | 5.45E-01 |
| CCDC39   | 0.1269  | 1.45E-02 | 3.96E-02 |
| CCDC3    | -0.1711 | 9.35E-04 | 4.06E-03 |
| CCDC40   | 0.2340  | 5.24E-06 | 4.83E-05 |
| CCDC41   | 0.1847  | 3.49E-04 | 1.77E-03 |
| CCDC42B  | 0.2468  | 1.50E-06 | 1.62E-05 |
| CCDC42   | -0.0799 | 1.24E-01 | 2.20E-01 |
| CCDC43   | 0.3301  | 7.05E-11 | 2.14E-09 |
| CCDC45   | 0.4822  | 5.39E-23 | 2.15E-20 |
| CCDC46   | 0.1035  | 4.63E-02 | 1.01E-01 |
| CCDC47   | 0.0020  | 9.69E-01 | 9.80E-01 |
| CCDC48   | -0.1143 | 2.78E-02 | 6.71E-02 |
| CCDC50   | 0.0269  | 6.05E-01 | 7.17E-01 |
| CCDC51   | 0.0177  | 7.34E-01 | 8.20E-01 |
| CCDC52   | 0.1190  | 2.18E-02 | 5.52E-02 |
| CCDC53   | -0.1736 | 7.87E-04 | 3.50E-03 |
| CCDC54   | 0.0117  | 8.23E-01 | 8.84E-01 |
| CCDC55   | 0.1366  | 8.42E-03 | 2.54E-02 |
| CCDC56   | 0.1112  | 3.23E-02 | 7.57E-02 |
| CCDC57   | 0.1480  | 4.28E-03 | 1.45E-02 |
| CCDC58   | 0.0445  | 3.93E-01 | 5.26E-01 |
| CCDC59   | 0.3019  | 2.94E-09 | 6.23E-08 |
| CCDC60   | -0.0273 | 6.00E-01 | 7.13E-01 |
| CCDC61   | 0.1483  | 4.20E-03 | 1.43E-02 |
| CCDC62   | 0.1467  | 4.62E-03 | 1.54E-02 |
| CCDC63   | 0.1364  | 8.52E-03 | 2.56E-02 |
| CCDC64B  | 0.1171  | 2.41E-02 | 5.99E-02 |

|         |         |          |          |
|---------|---------|----------|----------|
| CCDC64  | 0.2129  | 3.55E-05 | 2.53E-04 |
| CCDC65  | 0.0813  | 1.18E-01 | 2.11E-01 |
| CCDC66  | 0.3285  | 8.74E-11 | 2.59E-09 |
| CCDC67  | 0.2257  | 1.13E-05 | 9.38E-05 |
| CCDC68  | -0.0234 | 6.54E-01 | 7.56E-01 |
| CCDC69  | -0.1599 | 2.01E-03 | 7.72E-03 |
| CCDC6   | 0.1553  | 2.70E-03 | 9.88E-03 |
| CCDC70  | -0.0083 | 8.73E-01 | 9.18E-01 |
| CCDC71  | 0.0544  | 2.96E-01 | 4.25E-01 |
| CCDC72  | 0.0888  | 8.77E-02 | 1.67E-01 |
| CCDC73  | 0.1934  | 1.78E-04 | 9.96E-04 |
| CCDC74A | 0.1725  | 8.47E-04 | 3.72E-03 |
| CCDC74B | 0.2411  | 2.64E-06 | 2.64E-05 |
| CCDC75  | 0.0344  | 5.09E-01 | 6.34E-01 |
| CCDC76  | 0.2069  | 5.95E-05 | 3.92E-04 |
| CCDC77  | 0.2823  | 3.16E-08 | 5.18E-07 |
| CCDC78  | 0.1914  | 2.09E-04 | 1.15E-03 |
| CCDC79  | 0.0427  | 4.12E-01 | 5.45E-01 |
| CCDC7   | 0.1122  | 3.07E-02 | 7.27E-02 |
| CCDC80  | -0.0897 | 8.46E-02 | 1.63E-01 |
| CCDC81  | 0.1151  | 2.67E-02 | 6.50E-02 |
| CCDC82  | 0.0902  | 8.28E-02 | 1.60E-01 |
| CCDC83  | 0.1277  | 1.38E-02 | 3.82E-02 |
| CCDC84  | 0.2608  | 3.48E-07 | 4.44E-06 |
| CCDC85A | -0.1716 | 9.03E-04 | 3.94E-03 |
| CCDC85B | -0.0919 | 7.72E-02 | 1.52E-01 |
| CCDC85C | -0.0074 | 8.87E-01 | 9.28E-01 |
| CCDC86  | 0.1167  | 2.46E-02 | 6.07E-02 |
| CCDC87  | 0.1037  | 4.59E-02 | 1.01E-01 |
| CCDC88A | 0.0593  | 2.54E-01 | 3.80E-01 |
| CCDC88B | 0.0177  | 7.35E-01 | 8.20E-01 |
| CCDC88C | 0.0726  | 1.63E-01 | 2.70E-01 |
| CCDC89  | -0.0004 | 9.94E-01 | 9.96E-01 |
| CCDC8   | -0.0018 | 9.73E-01 | 9.83E-01 |
| CCDC90A | -0.0642 | 2.17E-01 | 3.37E-01 |
| CCDC90B | -0.0878 | 9.14E-02 | 1.73E-01 |
| CCDC91  | 0.0089  | 8.65E-01 | 9.13E-01 |
| CCDC92  | -0.0629 | 2.27E-01 | 3.48E-01 |
| CCDC93  | 0.3051  | 1.96E-09 | 4.35E-08 |
| CCDC94  | -0.0120 | 8.17E-01 | 8.80E-01 |
| CCDC96  | 0.0782  | 1.32E-01 | 2.30E-01 |
| CCDC97  | 0.2803  | 3.98E-08 | 6.37E-07 |
| CCDC99  | 0.3820  | 2.47E-14 | 1.48E-12 |
| CCDC9   | 0.1483  | 4.20E-03 | 1.43E-02 |



|             |         |          |          |
|-------------|---------|----------|----------|
| CCHCR1      | 0.3901  | 6.24E-15 | 4.20E-13 |
| CCIN        | 0.0767  | 1.41E-01 | 2.41E-01 |
| CCKAR       | 0.0408  | 4.33E-01 | 5.65E-01 |
| CCKBR       | 0.0659  | 2.06E-01 | 3.23E-01 |
| CCK         | 0.0937  | 7.14E-02 | 1.42E-01 |
| CCL11       | -0.0425 | 4.14E-01 | 5.47E-01 |
| CCL13       | -0.0491 | 3.45E-01 | 4.77E-01 |
| CCL14-CCL15 | -0.0910 | 8.00E-02 | 1.56E-01 |
| CCL14       | -0.3055 | 1.88E-09 | 4.21E-08 |
| CCL15       | 0.0021  | 9.68E-01 | 9.80E-01 |
| CCL16       | -0.2623 | 2.96E-07 | 3.87E-06 |
| CCL17       | 0.0123  | 8.13E-01 | 8.77E-01 |
| CCL18       | -0.1406 | 6.68E-03 | 2.10E-02 |
| CCL19       | -0.0254 | 6.25E-01 | 7.34E-01 |
| CCL1        | 0.0740  | 1.55E-01 | 2.60E-01 |
| CCL20       | 0.1797  | 5.06E-04 | 2.40E-03 |
| CCL21       | -0.0631 | 2.25E-01 | 3.47E-01 |
| CCL22       | -0.0895 | 8.52E-02 | 1.64E-01 |
| CCL23       | -0.1654 | 1.39E-03 | 5.67E-03 |
| CCL24       | -0.1054 | 4.25E-02 | 9.46E-02 |
| CCL25       | 0.1241  | 1.68E-02 | 4.46E-02 |
| CCL26       | 0.2117  | 3.94E-05 | 2.76E-04 |
| CCL27       | 0.1591  | 2.11E-03 | 8.06E-03 |
| CCL28       | 0.1085  | 3.67E-02 | 8.42E-02 |
| CCL2        | -0.1103 | 3.37E-02 | 7.86E-02 |
| CCL3L1      | 0.0609  | 2.42E-01 | 3.66E-01 |
| CCL3L3      | 0.0085  | 8.70E-01 | 9.16E-01 |
| CCL3        | -0.0938 | 7.10E-02 | 1.42E-01 |
| CCL4L2      | 0.0038  | 9.42E-01 | 9.64E-01 |
| CCL4        | -0.0818 | 1.16E-01 | 2.08E-01 |
| CCL5        | -0.0639 | 2.20E-01 | 3.40E-01 |
| CCL7        | -0.0133 | 7.99E-01 | 8.67E-01 |
| CCL8        | -0.0341 | 5.12E-01 | 6.37E-01 |
| CCM2        | -0.2038 | 7.67E-05 | 4.87E-04 |
| CCNA1       | -0.0128 | 8.06E-01 | 8.72E-01 |
| CCNA2       | 0.3136  | 6.54E-10 | 1.61E-08 |
| CCNB1IP1    | -0.1834 | 3.83E-04 | 1.91E-03 |
| CCNB1       | 0.3786  | 4.34E-14 | 2.48E-12 |
| CCNB2       | 0.4042  | 5.14E-16 | 4.43E-14 |
| CCNB3       | 0.0158  | 7.61E-01 | 8.39E-01 |
| CCNC        | 0.0523  | 3.15E-01 | 4.45E-01 |
| CCND1       | -0.2993 | 4.06E-09 | 8.34E-08 |
| CCND2       | -0.0643 | 2.17E-01 | 3.37E-01 |
| CCND3       | -0.0196 | 7.07E-01 | 7.99E-01 |

|         |         |          |          |
|---------|---------|----------|----------|
| CCNDBP1 | -0.1265 | 1.48E-02 | 4.02E-02 |
| CCNE1   | 0.2767  | 6.03E-08 | 9.22E-07 |
| CCNE2   | 0.3979  | 1.60E-15 | 1.22E-13 |
| CCNF    | 0.4468  | 1.31E-19 | 3.04E-17 |
| CCNG1   | -0.0856 | 9.98E-02 | 1.86E-01 |
| CCNG2   | -0.0311 | 5.51E-01 | 6.71E-01 |
| CCNH    | -0.1239 | 1.70E-02 | 4.49E-02 |
| CCNI2   | 0.3830  | 2.08E-14 | 1.27E-12 |
| CCNI    | -0.0851 | 1.02E-01 | 1.88E-01 |
| CCNJL   | 0.1581  | 2.25E-03 | 8.49E-03 |
| CCNJ    | 0.0522  | 3.16E-01 | 4.46E-01 |
| CCNK    | 0.1742  | 7.54E-04 | 3.38E-03 |
| CCNL1   | 0.1808  | 4.65E-04 | 2.24E-03 |
| CCNL2   | 0.1507  | 3.61E-03 | 1.26E-02 |
| CCNO    | 0.0069  | 8.94E-01 | 9.33E-01 |
| CCNT1   | -0.0355 | 4.95E-01 | 6.21E-01 |
| CCNT2   | 0.0574  | 2.70E-01 | 3.98E-01 |
| CCNYL1  | 0.1094  | 3.52E-02 | 8.14E-02 |
| CCNY    | -0.0888 | 8.77E-02 | 1.67E-01 |
| CCPG1   | -0.2987 | 4.38E-09 | 8.90E-08 |
| CCR10   | 0.0851  | 1.02E-01 | 1.88E-01 |
| CCR1    | -0.1362 | 8.63E-03 | 2.59E-02 |
| CCR2    | -0.0837 | 1.08E-01 | 1.97E-01 |
| CCR3    | 0.0801  | 1.23E-01 | 2.19E-01 |
| CCR4    | -0.1070 | 3.94E-02 | 8.90E-02 |
| CCR5    | -0.0356 | 4.94E-01 | 6.21E-01 |
| CCR6    | 0.1325  | 1.06E-02 | 3.06E-02 |
| CCR7    | -0.0457 | 3.80E-01 | 5.13E-01 |
| CCR8    | -0.0033 | 9.50E-01 | 9.69E-01 |
| CCR9    | -0.0226 | 6.65E-01 | 7.65E-01 |
| CCRL1   | 0.0214  | 6.81E-01 | 7.78E-01 |
| CCRL2   | 0.0074  | 8.88E-01 | 9.28E-01 |
| CCRN4L  | -0.0726 | 1.63E-01 | 2.70E-01 |
| CCS     | -0.1168 | 2.45E-02 | 6.05E-02 |
| CCT2    | 0.2044  | 7.30E-05 | 4.67E-04 |
| CCT3    | 0.4311  | 3.22E-18 | 4.86E-16 |
| CCT4    | 0.1895  | 2.41E-04 | 1.29E-03 |
| CCT5    | 0.1816  | 4.39E-04 | 2.13E-03 |
| CCT6A   | 0.2101  | 4.51E-05 | 3.10E-04 |
| CCT6B   | -0.2424 | 2.32E-06 | 2.38E-05 |
| CCT6P1  | 0.2359  | 4.34E-06 | 4.12E-05 |
| CCT7    | 0.0660  | 2.04E-01 | 3.22E-01 |
| CCT8L2  | 0.0333  | 5.23E-01 | 6.47E-01 |
| CCT8    | 0.1792  | 5.22E-04 | 2.47E-03 |

|          |         |          |          |
|----------|---------|----------|----------|
| CD101    | 0.0485  | 3.52E-01 | 4.84E-01 |
| CD109    | 0.1217  | 1.91E-02 | 4.95E-02 |
| CD14     | -0.2458 | 1.65E-06 | 1.76E-05 |
| CD151    | -0.0187 | 7.20E-01 | 8.10E-01 |
| CD160    | 0.0340  | 5.14E-01 | 6.38E-01 |
| CD163L1  | -0.0884 | 8.92E-02 | 1.70E-01 |
| CD163    | -0.1948 | 1.59E-04 | 9.07E-04 |
| CD164L2  | 0.0496  | 3.41E-01 | 4.72E-01 |
| CD164    | 0.0639  | 2.20E-01 | 3.40E-01 |
| CD177    | 0.1043  | 4.48E-02 | 9.86E-02 |
| CD180    | -0.0813 | 1.18E-01 | 2.11E-01 |
| CD19     | 0.1113  | 3.22E-02 | 7.56E-02 |
| CD1A     | 0.1041  | 4.52E-02 | 9.93E-02 |
| CD1B     | 0.0528  | 3.10E-01 | 4.40E-01 |
| CD1C     | -0.0657 | 2.07E-01 | 3.24E-01 |
| CD1D     | -0.1080 | 3.76E-02 | 8.58E-02 |
| CD1E     | -0.0097 | 8.52E-01 | 9.04E-01 |
| CD200R1L | -0.0445 | 3.93E-01 | 5.26E-01 |
| CD200R1  | -0.1294 | 1.26E-02 | 3.53E-02 |
| CD200    | -0.0546 | 2.94E-01 | 4.23E-01 |
| CD207    | 0.0625  | 2.30E-01 | 3.53E-01 |
| CD209    | -0.0988 | 5.72E-02 | 1.19E-01 |
| CD226    | -0.1410 | 6.53E-03 | 2.06E-02 |
| CD22     | -0.0017 | 9.74E-01 | 9.84E-01 |
| CD244    | -0.1064 | 4.06E-02 | 9.12E-02 |
| CD247    | -0.0573 | 2.71E-01 | 3.99E-01 |
| CD248    | -0.0213 | 6.82E-01 | 7.79E-01 |
| CD24     | 0.2347  | 4.90E-06 | 4.56E-05 |
| CD274    | -0.0971 | 6.18E-02 | 1.27E-01 |
| CD276    | 0.0860  | 9.81E-02 | 1.83E-01 |
| CD27     | 0.0211  | 6.85E-01 | 7.82E-01 |
| CD28     | -0.0797 | 1.25E-01 | 2.21E-01 |
| CD2AP    | 0.2387  | 3.32E-06 | 3.25E-05 |
| CD2BP2   | 0.0459  | 3.78E-01 | 5.12E-01 |
| CD2      | -0.0224 | 6.67E-01 | 7.67E-01 |
| CD300A   | -0.0549 | 2.91E-01 | 4.20E-01 |
| CD300C   | -0.0777 | 1.35E-01 | 2.35E-01 |
| CD300E   | -0.1398 | 6.98E-03 | 2.17E-02 |
| CD300LB  | 0.0647  | 2.14E-01 | 3.33E-01 |
| CD300LD  | 0.0149  | 7.75E-01 | 8.49E-01 |
| CD300LF  | -0.0183 | 7.26E-01 | 8.14E-01 |
| CD300LG  | -0.2505 | 1.03E-06 | 1.16E-05 |
| CD302    | -0.2770 | 5.80E-08 | 8.91E-07 |
| CD320    | 0.0096  | 8.54E-01 | 9.06E-01 |

|        |         |          |          |
|--------|---------|----------|----------|
| CD33   | -0.0702 | 1.77E-01 | 2.88E-01 |
| CD34   | -0.1517 | 3.41E-03 | 1.20E-02 |
| CD36   | -0.1199 | 2.09E-02 | 5.32E-02 |
| CD37   | -0.0430 | 4.09E-01 | 5.42E-01 |
| CD38   | 0.0102  | 8.44E-01 | 8.98E-01 |
| CD3D   | 0.0318  | 5.41E-01 | 6.62E-01 |
| CD3EAP | 0.2887  | 1.49E-08 | 2.66E-07 |
| CD3E   | -0.0559 | 2.83E-01 | 4.11E-01 |
| CD3G   | -0.0339 | 5.15E-01 | 6.39E-01 |
| CD40LG | -0.1055 | 4.22E-02 | 9.41E-02 |
| CD40   | -0.1037 | 4.60E-02 | 1.01E-01 |
| CD44   | -0.1080 | 3.75E-02 | 8.58E-02 |
| CD46   | 0.1119  | 3.12E-02 | 7.37E-02 |
| CD47   | 0.0442  | 3.96E-01 | 5.29E-01 |
| CD48   | -0.0614 | 2.38E-01 | 3.62E-01 |
| CD4    | -0.1754 | 6.91E-04 | 3.13E-03 |
| CD52   | -0.0312 | 5.49E-01 | 6.70E-01 |
| CD53   | -0.0671 | 1.98E-01 | 3.14E-01 |
| CD55   | 0.0144  | 7.83E-01 | 8.55E-01 |
| CD58   | 0.1783  | 5.59E-04 | 2.61E-03 |
| CD59   | -0.1569 | 2.45E-03 | 9.10E-03 |
| CD5L   | -0.1977 | 1.27E-04 | 7.46E-04 |
| CD5    | -0.0729 | 1.61E-01 | 2.68E-01 |
| CD63   | -0.0231 | 6.57E-01 | 7.59E-01 |
| CD68   | -0.1688 | 1.10E-03 | 4.67E-03 |
| CD69   | -0.1136 | 2.87E-02 | 6.91E-02 |
| CD6    | -0.0399 | 4.44E-01 | 5.76E-01 |
| CD70   | 0.0205  | 6.94E-01 | 7.89E-01 |
| CD72   | -0.0515 | 3.23E-01 | 4.53E-01 |
| CD74   | -0.0635 | 2.23E-01 | 3.44E-01 |
| CD79A  | 0.0110  | 8.33E-01 | 8.90E-01 |
| CD79B  | -0.0013 | 9.81E-01 | 9.88E-01 |
| CD7    | 0.0784  | 1.32E-01 | 2.29E-01 |
| CD80   | 0.0050  | 9.23E-01 | 9.51E-01 |
| CD81   | -0.1836 | 3.79E-04 | 1.89E-03 |
| CD82   | -0.1608 | 1.89E-03 | 7.33E-03 |
| CD83   | 0.0887  | 8.79E-02 | 1.68E-01 |
| CD84   | -0.1130 | 2.96E-02 | 7.07E-02 |
| CD86   | -0.0603 | 2.47E-01 | 3.71E-01 |
| CD8A   | -0.0505 | 3.32E-01 | 4.63E-01 |
| CD8B   | -0.0175 | 7.37E-01 | 8.22E-01 |
| CD93   | -0.1732 | 8.05E-04 | 3.57E-03 |
| CD96   | -0.1010 | 5.20E-02 | 1.11E-01 |
| CD97   | 0.0410  | 4.31E-01 | 5.63E-01 |

|          |         |          |          |
|----------|---------|----------|----------|
| CD99L2   | -0.0798 | 1.25E-01 | 2.21E-01 |
| CD99     | -0.0563 | 2.79E-01 | 4.08E-01 |
| CD9      | -0.0075 | 8.86E-01 | 9.27E-01 |
| CDADC1   | -0.1953 | 1.54E-04 | 8.82E-04 |
| CDAN1    | 0.2040  | 7.54E-05 | 4.80E-04 |
| CDA      | -0.0806 | 1.21E-01 | 2.16E-01 |
| CDC123   | 0.1229  | 1.79E-02 | 4.69E-02 |
| CDC14A   | 0.1052  | 4.28E-02 | 9.51E-02 |
| CDC14B   | -0.2466 | 1.52E-06 | 1.64E-05 |
| CDC14C   | -0.2143 | 3.16E-05 | 2.29E-04 |
| CDC16    | 0.2307  | 7.12E-06 | 6.26E-05 |
| CDC20B   | 0.0306  | 5.56E-01 | 6.75E-01 |
| CDC20    | 0.4199  | 2.79E-17 | 3.25E-15 |
| CDC23    | 0.1744  | 7.41E-04 | 3.33E-03 |
| CDC25A   | 0.3435  | 1.02E-11 | 3.62E-10 |
| CDC25B   | 0.2054  | 6.75E-05 | 4.37E-04 |
| CDC25C   | 0.4232  | 1.49E-17 | 1.92E-15 |
| CDC26    | 0.1800  | 4.94E-04 | 2.35E-03 |
| CDC27    | 0.2314  | 6.70E-06 | 5.97E-05 |
| CDC34    | -0.1517 | 3.40E-03 | 1.20E-02 |
| CDC37L1  | -0.3045 | 2.11E-09 | 4.65E-08 |
| CDC37    | 0.0070  | 8.93E-01 | 9.32E-01 |
| CDC40    | 0.1096  | 3.48E-02 | 8.06E-02 |
| CDC42BPA | -0.0606 | 2.44E-01 | 3.68E-01 |
| CDC42BPB | -0.0508 | 3.29E-01 | 4.60E-01 |
| CDC42BPG | 0.1469  | 4.59E-03 | 1.54E-02 |
| CDC42EP1 | 0.1552  | 2.73E-03 | 9.98E-03 |
| CDC42EP2 | 0.0137  | 7.93E-01 | 8.63E-01 |
| CDC42EP3 | -0.1541 | 2.91E-03 | 1.05E-02 |
| CDC42EP4 | 0.3247  | 1.48E-10 | 4.20E-09 |
| CDC42EP5 | -0.0878 | 9.13E-02 | 1.73E-01 |
| CDC42SE1 | 0.4175  | 4.41E-17 | 4.84E-15 |
| CDC42SE2 | 0.1193  | 2.15E-02 | 5.44E-02 |
| CDC42    | 0.0081  | 8.76E-01 | 9.20E-01 |
| CDC45    | 0.4390  | 6.51E-19 | 1.26E-16 |
| CDC5L    | 0.0943  | 6.96E-02 | 1.40E-01 |
| CDC6     | 0.4614  | 5.91E-21 | 1.71E-18 |
| CDC73    | 0.1922  | 1.96E-04 | 1.08E-03 |
| CDC7     | 0.3846  | 1.59E-14 | 9.88E-13 |
| CDCA2    | 0.3857  | 1.32E-14 | 8.36E-13 |
| CDCA3    | 0.4085  | 2.35E-16 | 2.16E-14 |
| CDCA4    | 0.4201  | 2.68E-17 | 3.14E-15 |
| CDCA5    | 0.4168  | 5.03E-17 | 5.42E-15 |
| CDCA7L   | 0.2981  | 4.75E-09 | 9.56E-08 |

|        |         |          |          |
|--------|---------|----------|----------|
| CDCA7  | 0.3605  | 7.88E-13 | 3.62E-11 |
| CDCA8  | 0.4229  | 1.57E-17 | 1.98E-15 |
| CDCP1  | 0.1565  | 2.51E-03 | 9.28E-03 |
| CDCP2  | 0.0719  | 1.67E-01 | 2.75E-01 |
| CDH10  | 0.1693  | 1.06E-03 | 4.53E-03 |
| CDH11  | -0.0809 | 1.20E-01 | 2.14E-01 |
| CDH12  | 0.1204  | 2.03E-02 | 5.20E-02 |
| CDH13  | -0.2048 | 7.08E-05 | 4.55E-04 |
| CDH15  | -0.0360 | 4.89E-01 | 6.16E-01 |
| CDH16  | -0.0073 | 8.88E-01 | 9.28E-01 |
| CDH17  | 0.0917  | 7.79E-02 | 1.52E-01 |
| CDH18  | 0.2617  | 3.18E-07 | 4.10E-06 |
| CDH19  | -0.0579 | 2.66E-01 | 3.93E-01 |
| CDH1   | -0.1119 | 3.11E-02 | 7.36E-02 |
| CDH20  | 0.0283  | 5.86E-01 | 7.02E-01 |
| CDH22  | -0.0621 | 2.32E-01 | 3.56E-01 |
| CDH23  | -0.0840 | 1.06E-01 | 1.95E-01 |
| CDH24  | 0.1865  | 3.04E-04 | 1.58E-03 |
| CDH26  | 0.0637  | 2.21E-01 | 3.41E-01 |
| CDH2   | 0.0316  | 5.44E-01 | 6.65E-01 |
| CDH3   | -0.0960 | 6.47E-02 | 1.32E-01 |
| CDH4   | -0.0572 | 2.72E-01 | 4.00E-01 |
| CDH5   | -0.2435 | 2.08E-06 | 2.16E-05 |
| CDH6   | -0.0020 | 9.69E-01 | 9.81E-01 |
| CDH7   | 0.0117  | 8.22E-01 | 8.84E-01 |
| CDH8   | 0.0950  | 6.76E-02 | 1.37E-01 |
| CDH9   | 0.0217  | 6.78E-01 | 7.76E-01 |
| CDHR1  | -0.0758 | 1.45E-01 | 2.47E-01 |
| CDHR2  | -0.1082 | 3.73E-02 | 8.53E-02 |
| CDHR3  | -0.0284 | 5.85E-01 | 7.01E-01 |
| CDHR4  | 0.1393  | 7.19E-03 | 2.22E-02 |
| CDHR5  | -0.0407 | 4.35E-01 | 5.67E-01 |
| CDIPT  | -0.1340 | 9.77E-03 | 2.87E-02 |
| CDK10  | -0.0272 | 6.02E-01 | 7.14E-01 |
| CDK11A | 0.0543  | 2.97E-01 | 4.26E-01 |
| CDK11B | 0.0320  | 5.39E-01 | 6.61E-01 |
| CDK12  | 0.0766  | 1.41E-01 | 2.41E-01 |
| CDK13  | 0.0370  | 4.77E-01 | 6.06E-01 |
| CDK14  | -0.0714 | 1.70E-01 | 2.79E-01 |
| CDK15  | -0.0907 | 8.10E-02 | 1.57E-01 |
| CDK16  | 0.3114  | 8.71E-10 | 2.09E-08 |
| CDK17  | 0.0007  | 9.90E-01 | 9.94E-01 |
| CDK18  | -0.0121 | 8.17E-01 | 8.80E-01 |
| CDK19  | 0.3298  | 7.31E-11 | 2.21E-09 |

|            |         |          |          |
|------------|---------|----------|----------|
| CDK1       | 0.4368  | 1.02E-18 | 1.84E-16 |
| CDK20      | 0.1226  | 1.82E-02 | 4.75E-02 |
| CDK2AP1    | -0.0112 | 8.30E-01 | 8.89E-01 |
| CDK2AP2    | 0.0038  | 9.42E-01 | 9.64E-01 |
| CDK2       | 0.2885  | 1.52E-08 | 2.71E-07 |
| CDK3       | 0.1770  | 6.16E-04 | 2.84E-03 |
| CDK4       | 0.2422  | 2.36E-06 | 2.41E-05 |
| CDK5R1     | 0.2216  | 1.65E-05 | 1.31E-04 |
| CDK5R2     | 0.1555  | 2.67E-03 | 9.81E-03 |
| CDK5RAP1   | 0.1326  | 1.06E-02 | 3.06E-02 |
| CDK5RAP2   | 0.2262  | 1.09E-05 | 9.04E-05 |
| CDK5RAP3   | 0.2849  | 2.33E-08 | 3.95E-07 |
| CDK5       | -0.1209 | 1.99E-02 | 5.11E-02 |
| CDK6       | -0.2314 | 6.72E-06 | 5.97E-05 |
| CDK7       | 0.1700  | 1.01E-03 | 4.34E-03 |
| CDK8       | -0.0117 | 8.23E-01 | 8.84E-01 |
| CDK9       | 0.0419  | 4.21E-01 | 5.54E-01 |
| CDKAL1     | 0.2791  | 4.60E-08 | 7.27E-07 |
| CDKL1      | 0.0696  | 1.81E-01 | 2.93E-01 |
| CDKL2      | 0.0486  | 3.50E-01 | 4.83E-01 |
| CDKL3      | 0.0862  | 9.75E-02 | 1.82E-01 |
| CDKL4      | 0.1397  | 7.02E-03 | 2.18E-02 |
| CDKL5      | -0.0710 | 1.72E-01 | 2.82E-01 |
| CDKN1A     | 0.0190  | 7.16E-01 | 8.06E-01 |
| CDKN1B     | 0.0563  | 2.79E-01 | 4.08E-01 |
| CDKN1C     | 0.0970  | 6.19E-02 | 1.27E-01 |
| CDKN2AIPNL | 0.1238  | 1.70E-02 | 4.51E-02 |
| CDKN2AIP   | -0.1078 | 3.80E-02 | 8.66E-02 |
| CDKN2A     | 0.2788  | 4.76E-08 | 7.47E-07 |
| CDKN2BAS   | 0.2650  | 2.21E-07 | 2.97E-06 |
| CDKN2B     | 0.1369  | 8.28E-03 | 2.50E-02 |
| CDKN2C     | 0.3240  | 1.64E-10 | 4.61E-09 |
| CDKN2D     | 0.2111  | 4.16E-05 | 2.89E-04 |
| CDKN3      | 0.4002  | 1.05E-15 | 8.42E-14 |
| CDNF       | -0.2151 | 2.95E-05 | 2.16E-04 |
| CDO1       | -0.2344 | 5.01E-06 | 4.65E-05 |
| CDON       | 0.1281  | 1.35E-02 | 3.75E-02 |
| CDR1       | 0.0602  | 2.48E-01 | 3.72E-01 |
| CDR2L      | 0.0426  | 4.14E-01 | 5.46E-01 |
| CDR2       | -0.0026 | 9.60E-01 | 9.75E-01 |
| CDRT15P    | 0.0925  | 7.52E-02 | 1.48E-01 |
| CDRT15     | 0.0986  | 5.79E-02 | 1.21E-01 |
| CDRT1      | 0.0742  | 1.54E-01 | 2.58E-01 |
| CDRT4      | 0.1085  | 3.68E-02 | 8.43E-02 |

|           |         |          |          |
|-----------|---------|----------|----------|
| CDS1      | 0.1314  | 1.13E-02 | 3.23E-02 |
| CDS2      | -0.1967 | 1.37E-04 | 8.00E-04 |
| CDSN      | -0.0124 | 8.11E-01 | 8.76E-01 |
| CDT1      | 0.3991  | 1.29E-15 | 1.01E-13 |
| CDV3      | 0.0622  | 2.32E-01 | 3.55E-01 |
| CDX1      | -0.0449 | 3.88E-01 | 5.21E-01 |
| CDX2      | 0.2034  | 7.94E-05 | 5.01E-04 |
| CDY2B     | 0.0346  | 5.07E-01 | 6.32E-01 |
| CDYL2     | -0.1065 | 4.03E-02 | 9.06E-02 |
| CDYL      | 0.1200  | 2.08E-02 | 5.29E-02 |
| CEACAM16  | 0.0172  | 7.41E-01 | 8.25E-01 |
| CEACAM18  | 0.0006  | 9.91E-01 | 9.95E-01 |
| CEACAM19  | 0.1807  | 4.71E-04 | 2.26E-03 |
| CEACAM1   | -0.1857 | 3.22E-04 | 1.66E-03 |
| CEACAM20  | 0.0242  | 6.42E-01 | 7.47E-01 |
| CEACAM21  | -0.0541 | 2.99E-01 | 4.28E-01 |
| CEACAM22P | -0.0761 | 1.43E-01 | 2.45E-01 |
| CEACAM3   | 0.0365  | 4.83E-01 | 6.12E-01 |
| CEACAM4   | -0.0348 | 5.04E-01 | 6.30E-01 |
| CEACAM5   | 0.1010  | 5.19E-02 | 1.11E-01 |
| CEACAM6   | 0.0171  | 7.43E-01 | 8.27E-01 |
| CEACAM7   | 0.1196  | 2.12E-02 | 5.39E-02 |
| CEACAM8   | -0.0647 | 2.14E-01 | 3.33E-01 |
| CEBPA     | 0.1492  | 3.98E-03 | 1.37E-02 |
| CEBPB     | -0.1155 | 2.61E-02 | 6.39E-02 |
| CEBPD     | -0.1308 | 1.17E-02 | 3.31E-02 |
| CEBPE     | 0.0082  | 8.75E-01 | 9.19E-01 |
| CEBPG     | 0.0514  | 3.23E-01 | 4.54E-01 |
| CEBPZ     | 0.1621  | 1.73E-03 | 6.82E-03 |
| CECR1     | -0.1667 | 1.27E-03 | 5.27E-03 |
| CECR2     | -0.0385 | 4.60E-01 | 5.90E-01 |
| CECR4     | -0.0201 | 6.99E-01 | 7.93E-01 |
| CECR5     | -0.1446 | 5.27E-03 | 1.72E-02 |
| CECR6     | 0.0940  | 7.04E-02 | 1.41E-01 |
| CECR7     | 0.1722  | 8.68E-04 | 3.80E-03 |
| CELA1     | 0.0283  | 5.87E-01 | 7.02E-01 |
| CELA2A    | -0.0086 | 8.69E-01 | 9.15E-01 |
| CELA2B    | -0.0507 | 3.30E-01 | 4.61E-01 |
| CELA3A    | 0.0079  | 8.79E-01 | 9.22E-01 |
| CELA3B    | 0.0315  | 5.46E-01 | 6.66E-01 |
| CELF1     | -0.0029 | 9.56E-01 | 9.72E-01 |
| CELF2     | -0.1142 | 2.79E-02 | 6.74E-02 |
| CELF3     | 0.0642  | 2.17E-01 | 3.38E-01 |
| CELF4     | 0.2431  | 2.15E-06 | 2.22E-05 |



|         |         |          |          |
|---------|---------|----------|----------|
| CELF5   | 0.0692  | 1.84E-01 | 2.96E-01 |
| CELF6   | 0.0450  | 3.88E-01 | 5.21E-01 |
| CELP    | 0.0814  | 1.18E-01 | 2.11E-01 |
| CELSR1  | 0.0994  | 5.57E-02 | 1.17E-01 |
| CELSR2  | 0.0656  | 2.08E-01 | 3.26E-01 |
| CELSR3  | 0.2397  | 3.03E-06 | 2.99E-05 |
| CEL     | 0.2024  | 8.63E-05 | 5.37E-04 |
| CEMP1   | 0.0774  | 1.37E-01 | 2.36E-01 |
| CEND1   | -0.0406 | 4.36E-01 | 5.68E-01 |
| CENPA   | 0.3900  | 6.35E-15 | 4.26E-13 |
| CENPBD1 | -0.1112 | 3.22E-02 | 7.57E-02 |
| CENPB   | 0.0582  | 2.64E-01 | 3.91E-01 |
| CENPC1  | -0.0022 | 9.67E-01 | 9.79E-01 |
| CENPE   | 0.3591  | 9.82E-13 | 4.39E-11 |
| CENPF   | 0.4718  | 5.79E-22 | 1.89E-19 |
| CENPH   | 0.3639  | 4.67E-13 | 2.22E-11 |
| CENPI   | 0.3857  | 1.33E-14 | 8.40E-13 |
| CENPJ   | 0.4503  | 6.35E-20 | 1.60E-17 |
| CENPK   | 0.3768  | 5.87E-14 | 3.24E-12 |
| CENPL   | 0.5046  | 2.30E-25 | 1.27E-22 |
| CENPM   | 0.3787  | 4.25E-14 | 2.44E-12 |
| CENPN   | -0.0183 | 7.25E-01 | 8.14E-01 |
| CENPO   | 0.2038  | 7.66E-05 | 4.87E-04 |
| CENPP   | 0.2082  | 5.31E-05 | 3.57E-04 |
| CENPQ   | 0.3635  | 4.96E-13 | 2.34E-11 |
| CENPT   | 0.2098  | 4.65E-05 | 3.18E-04 |
| CENPV   | 0.1247  | 1.62E-02 | 4.33E-02 |
| CENPW   | 0.4024  | 7.12E-16 | 5.98E-14 |
| CEP110  | 0.2544  | 6.85E-07 | 8.10E-06 |
| CEP120  | -0.1021 | 4.95E-02 | 1.07E-01 |
| CEP135  | 0.2123  | 3.76E-05 | 2.66E-04 |
| CEP152  | 0.2951  | 6.83E-09 | 1.32E-07 |
| CEP164  | 0.2826  | 3.06E-08 | 5.03E-07 |
| CEP170L | 0.1063  | 4.07E-02 | 9.15E-02 |
| CEP170  | 0.1676  | 1.19E-03 | 4.98E-03 |
| CEP192  | 0.1914  | 2.08E-04 | 1.14E-03 |
| CEP250  | 0.3410  | 1.49E-11 | 5.16E-10 |
| CEP290  | 0.2069  | 5.96E-05 | 3.92E-04 |
| CEP350  | 0.2991  | 4.21E-09 | 8.58E-08 |
| CEP55   | 0.4014  | 8.51E-16 | 7.06E-14 |
| CEP57   | 0.1220  | 1.87E-02 | 4.87E-02 |
| CEP63   | 0.0818  | 1.16E-01 | 2.09E-01 |
| CEP68   | 0.0772  | 1.38E-01 | 2.37E-01 |
| CEP70   | 0.0247  | 6.35E-01 | 7.42E-01 |

|        |         |          |          |
|--------|---------|----------|----------|
| CEP72  | 0.2531  | 7.88E-07 | 9.15E-06 |
| CEP76  | 0.0540  | 3.00E-01 | 4.29E-01 |
| CEP78  | 0.3143  | 5.95E-10 | 1.49E-08 |
| CEP97  | 0.1177  | 2.34E-02 | 5.83E-02 |
| CEPT1  | -0.1795 | 5.12E-04 | 2.43E-03 |
| CER1   | 0.0873  | 9.31E-02 | 1.76E-01 |
| CERCAM | 0.0022  | 9.66E-01 | 9.79E-01 |
| CERKL  | 0.0032  | 9.50E-01 | 9.69E-01 |
| CERK   | 0.0272  | 6.01E-01 | 7.14E-01 |
| CES1   | -0.1444 | 5.31E-03 | 1.74E-02 |
| CES2   | -0.2804 | 3.96E-08 | 6.33E-07 |
| CES3   | -0.1133 | 2.92E-02 | 6.99E-02 |
| CES4   | -0.0921 | 7.65E-02 | 1.50E-01 |
| CES7   | -0.2481 | 1.31E-06 | 1.44E-05 |
| CES8   | -0.1828 | 4.03E-04 | 1.99E-03 |
| CETN1  | 0.0803  | 1.23E-01 | 2.18E-01 |
| CETN2  | 0.1374  | 8.04E-03 | 2.44E-02 |
| CETN3  | 0.0374  | 4.73E-01 | 6.02E-01 |
| CETN4P | -0.0377 | 4.69E-01 | 5.99E-01 |
| CETP   | -0.1788 | 5.39E-04 | 2.53E-03 |
| CFB    | -0.1877 | 2.76E-04 | 1.45E-03 |
| CFC1B  | 0.0257  | 6.21E-01 | 7.30E-01 |
| CFDP1  | -0.1329 | 1.04E-02 | 3.01E-02 |
| CFD    | -0.0749 | 1.50E-01 | 2.54E-01 |
| CFHR1  | -0.0597 | 2.51E-01 | 3.76E-01 |
| CFHR2  | -0.0744 | 1.53E-01 | 2.57E-01 |
| CFHR3  | -0.2072 | 5.78E-05 | 3.83E-04 |
| CFHR4  | -0.2472 | 1.43E-06 | 1.55E-05 |
| CFHR5  | -0.0764 | 1.42E-01 | 2.43E-01 |
| CFH    | -0.1302 | 1.21E-02 | 3.41E-02 |
| CFI    | -0.3321 | 5.33E-11 | 1.67E-09 |
| CFL1   | 0.0502  | 3.35E-01 | 4.67E-01 |
| CFL2   | -0.2535 | 7.49E-07 | 8.75E-06 |
| CFLAR  | -0.0298 | 5.67E-01 | 6.84E-01 |
| CFLP1  | 0.0214  | 6.82E-01 | 7.79E-01 |
| CFP    | -0.2075 | 5.63E-05 | 3.75E-04 |
| CFTR   | -0.0331 | 5.25E-01 | 6.48E-01 |
| CG030  | 0.1897  | 2.39E-04 | 1.28E-03 |
| CGA    | 0.0750  | 1.50E-01 | 2.53E-01 |
| CGB1   | -0.0170 | 7.45E-01 | 8.28E-01 |
| CGB2   | 0.0120  | 8.17E-01 | 8.80E-01 |
| CGB5   | 0.0315  | 5.45E-01 | 6.66E-01 |
| CGB7   | 0.0156  | 7.65E-01 | 8.41E-01 |
| CGB8   | 0.0063  | 9.04E-01 | 9.40E-01 |

|         |         |          |          |
|---------|---------|----------|----------|
| CGB     | 0.0707  | 1.74E-01 | 2.85E-01 |
| CGGBP1  | 0.0499  | 3.38E-01 | 4.69E-01 |
| CGNL1   | -0.1324 | 1.07E-02 | 3.08E-02 |
| CGN     | 0.0375  | 4.72E-01 | 6.01E-01 |
| CGREF1  | -0.0517 | 3.21E-01 | 4.51E-01 |
| CGRRF1  | 0.1203  | 2.04E-02 | 5.22E-02 |
| CH25H   | -0.1047 | 4.39E-02 | 9.70E-02 |
| CHAC1   | 0.0462  | 3.75E-01 | 5.08E-01 |
| CHAC2   | 0.0674  | 1.95E-01 | 3.11E-01 |
| CHADL   | -0.0682 | 1.90E-01 | 3.04E-01 |
| CHAD    | 0.0022  | 9.67E-01 | 9.80E-01 |
| CHAF1A  | 0.3938  | 3.25E-15 | 2.33E-13 |
| CHAF1B  | 0.4863  | 2.05E-23 | 8.33E-21 |
| CHAT    | 0.0040  | 9.38E-01 | 9.61E-01 |
| CHCHD10 | -0.1937 | 1.75E-04 | 9.81E-04 |
| CHCHD1  | 0.0585  | 2.61E-01 | 3.87E-01 |
| CHCHD2  | 0.0377  | 4.69E-01 | 5.99E-01 |
| CHCHD3  | -0.1272 | 1.42E-02 | 3.91E-02 |
| CHCHD4  | -0.0652 | 2.10E-01 | 3.28E-01 |
| CHCHD5  | -0.0901 | 8.29E-02 | 1.60E-01 |
| CHCHD6  | -0.0036 | 9.45E-01 | 9.66E-01 |
| CHCHD7  | -0.0654 | 2.09E-01 | 3.27E-01 |
| CHCHD8  | 0.0022  | 9.66E-01 | 9.79E-01 |
| CHD1L   | 0.4024  | 7.12E-16 | 5.98E-14 |
| CHD1    | 0.0703  | 1.76E-01 | 2.87E-01 |
| CHD2    | -0.0374 | 4.72E-01 | 6.01E-01 |
| CHD3    | 0.0929  | 7.40E-02 | 1.47E-01 |
| CHD4    | 0.2061  | 6.34E-05 | 4.14E-04 |
| CHD5    | 0.0816  | 1.17E-01 | 2.10E-01 |
| CHD6    | 0.0640  | 2.19E-01 | 3.39E-01 |
| CHD7    | 0.0214  | 6.82E-01 | 7.79E-01 |
| CHD8    | 0.1669  | 1.25E-03 | 5.21E-03 |
| CHD9    | -0.2170 | 2.50E-05 | 1.88E-04 |
| CHDH    | -0.0994 | 5.58E-02 | 1.17E-01 |
| CHEK1   | 0.4007  | 9.70E-16 | 7.92E-14 |
| CHEK2   | 0.1713  | 9.23E-04 | 4.01E-03 |
| CHERP   | -0.0003 | 9.96E-01 | 9.97E-01 |
| CHFR    | 0.0380  | 4.66E-01 | 5.96E-01 |
| CHGA    | 0.1205  | 2.03E-02 | 5.20E-02 |
| CHGB    | -0.0141 | 7.86E-01 | 8.58E-01 |
| CHI3L1  | -0.0559 | 2.82E-01 | 4.11E-01 |
| CHI3L2  | 0.0487  | 3.49E-01 | 4.82E-01 |
| CHIA    | 0.1115  | 3.17E-02 | 7.47E-02 |
| CHIC1   | 0.0331  | 5.25E-01 | 6.48E-01 |

|            |         |          |          |
|------------|---------|----------|----------|
| CHIC2      | 0.0195  | 7.09E-01 | 8.01E-01 |
| CHID1      | -0.1682 | 1.15E-03 | 4.84E-03 |
| CHIT1      | -0.0984 | 5.84E-02 | 1.21E-01 |
| CHKA       | 0.2111  | 4.17E-05 | 2.90E-04 |
| CHKB-CPT1B | 0.2125  | 3.68E-05 | 2.61E-04 |
| CHKB       | 0.0333  | 5.23E-01 | 6.47E-01 |
| CHL1       | -0.0852 | 1.01E-01 | 1.88E-01 |
| CHML       | 0.4148  | 7.39E-17 | 7.74E-15 |
| CHMP1A     | -0.1180 | 2.31E-02 | 5.77E-02 |
| CHMP1B     | -0.0425 | 4.14E-01 | 5.47E-01 |
| CHMP2A     | -0.0815 | 1.17E-01 | 2.10E-01 |
| CHMP2B     | -0.0506 | 3.31E-01 | 4.62E-01 |
| CHMP4A     | -0.0243 | 6.41E-01 | 7.47E-01 |
| CHMP4B     | 0.0852  | 1.01E-01 | 1.88E-01 |
| CHMP4C     | 0.1647  | 1.45E-03 | 5.88E-03 |
| CHMP5      | -0.0064 | 9.02E-01 | 9.38E-01 |
| CHMP6      | 0.0212  | 6.84E-01 | 7.80E-01 |
| CHMP7      | -0.0628 | 2.28E-01 | 3.50E-01 |
| CHM        | 0.0441  | 3.97E-01 | 5.30E-01 |
| CHN1       | -0.0816 | 1.17E-01 | 2.10E-01 |
| CHN2       | -0.1857 | 3.22E-04 | 1.66E-03 |
| CHODL      | 0.1218  | 1.89E-02 | 4.91E-02 |
| CHORDC1    | 0.2620  | 3.07E-07 | 3.98E-06 |
| CHP2       | 0.1274  | 1.41E-02 | 3.87E-02 |
| CHPF2      | -0.0703 | 1.77E-01 | 2.88E-01 |
| CHPF       | -0.1171 | 2.41E-02 | 5.98E-02 |
| CHPT1      | -0.2200 | 1.90E-05 | 1.48E-04 |
| CHP        | -0.3663 | 3.20E-13 | 1.56E-11 |
| CHRAC1     | 0.1401  | 6.86E-03 | 2.14E-02 |
| CHRDL1     | -0.0108 | 8.36E-01 | 8.92E-01 |
| CHRDL2     | -0.0315 | 5.46E-01 | 6.66E-01 |
| CHRD       | -0.0161 | 7.58E-01 | 8.37E-01 |
| CHRFAM7A   | 0.0673  | 1.96E-01 | 3.12E-01 |
| CHRM1      | 0.0861  | 9.76E-02 | 1.83E-01 |
| CHRM2      | -0.1985 | 1.19E-04 | 7.08E-04 |
| CHRM3      | 0.0787  | 1.30E-01 | 2.28E-01 |
| CHRM4      | -0.0132 | 8.00E-01 | 8.68E-01 |
| CHRM5      | 0.1391  | 7.30E-03 | 2.25E-02 |
| CHRNA10    | 0.2789  | 4.70E-08 | 7.39E-07 |
| CHRNA1     | 0.0760  | 1.44E-01 | 2.46E-01 |
| CHRNA2     | -0.0408 | 4.33E-01 | 5.65E-01 |
| CHRNA3     | -0.0034 | 9.48E-01 | 9.68E-01 |
| CHRNA4     | -0.0264 | 6.12E-01 | 7.23E-01 |
| CHRNA5     | 0.1177  | 2.33E-02 | 5.82E-02 |

|         |         |          |          |
|---------|---------|----------|----------|
| CHRNA6  | 0.0735  | 1.57E-01 | 2.63E-01 |
| CHRNA7  | 0.0307  | 5.56E-01 | 6.75E-01 |
| CHRNA9  | 0.1168  | 2.44E-02 | 6.04E-02 |
| CHRNA1  | -0.1057 | 4.18E-02 | 9.34E-02 |
| CHRNA2  | 0.1358  | 8.84E-03 | 2.65E-02 |
| CHRNA3  | -0.0274 | 5.99E-01 | 7.12E-01 |
| CHRNA4  | -0.0280 | 5.90E-01 | 7.05E-01 |
| CHRNA5  | 0.0807  | 1.21E-01 | 2.15E-01 |
| CHRNE   | -0.1339 | 9.81E-03 | 2.88E-02 |
| CHRNA6  | 0.1394  | 7.17E-03 | 2.22E-02 |
| CHST10  | 0.1165  | 2.48E-02 | 6.11E-02 |
| CHST11  | 0.0737  | 1.57E-01 | 2.62E-01 |
| CHST12  | 0.0760  | 1.44E-01 | 2.46E-01 |
| CHST13  | 0.0293  | 5.74E-01 | 6.91E-01 |
| CHST14  | 0.0408  | 4.33E-01 | 5.65E-01 |
| CHST15  | -0.1597 | 2.04E-03 | 7.83E-03 |
| CHST1   | 0.1501  | 3.75E-03 | 1.30E-02 |
| CHST2   | -0.0052 | 9.21E-01 | 9.50E-01 |
| CHST3   | 0.0451  | 3.86E-01 | 5.19E-01 |
| CHST4   | 0.0011  | 9.83E-01 | 9.89E-01 |
| CHST5   | 0.0335  | 5.20E-01 | 6.44E-01 |
| CHST6   | 0.0722  | 1.65E-01 | 2.73E-01 |
| CHST7   | -0.1342 | 9.68E-03 | 2.85E-02 |
| CHST8   | -0.1345 | 9.51E-03 | 2.81E-02 |
| CHST9   | -0.0499 | 3.38E-01 | 4.69E-01 |
| CHSY1   | -0.0860 | 9.81E-02 | 1.83E-01 |
| CHSY3   | -0.1558 | 2.62E-03 | 9.62E-03 |
| CHTF18  | 0.4174  | 4.48E-17 | 4.88E-15 |
| CHTF8   | -0.1469 | 4.58E-03 | 1.53E-02 |
| CHUK    | -0.1258 | 1.53E-02 | 4.14E-02 |
| CHURC1  | -0.1741 | 7.55E-04 | 3.38E-03 |
| CIAO1   | -0.1218 | 1.89E-02 | 4.92E-02 |
| CIAPIN1 | -0.1555 | 2.66E-03 | 9.78E-03 |
| CIB1    | -0.1589 | 2.14E-03 | 8.15E-03 |
| CIB2    | 0.1622  | 1.72E-03 | 6.79E-03 |
| CIB3    | 0.1086  | 3.65E-02 | 8.39E-02 |
| CIB4    | 0.0124  | 8.12E-01 | 8.77E-01 |
| CIC     | 0.1301  | 1.21E-02 | 3.42E-02 |
| CIDEA   | -0.0962 | 6.40E-02 | 1.31E-01 |
| CIDEB   | -0.3986 | 1.39E-15 | 1.08E-13 |
| CIDECP  | 0.1435  | 5.61E-03 | 1.81E-02 |
| CIDEC   | -0.0496 | 3.40E-01 | 4.72E-01 |
| CIITA   | 0.0350  | 5.01E-01 | 6.27E-01 |
| CILP2   | 0.0805  | 1.22E-01 | 2.17E-01 |

|        |         |          |          |
|--------|---------|----------|----------|
| CILP   | 0.0188  | 7.18E-01 | 8.08E-01 |
| CINP   | -0.0459 | 3.78E-01 | 5.11E-01 |
| CIR1   | 0.1325  | 1.06E-02 | 3.06E-02 |
| CIRBP  | -0.0380 | 4.65E-01 | 5.95E-01 |
| CIRH1A | 0.0091  | 8.61E-01 | 9.10E-01 |
| CISD1  | -0.1012 | 5.15E-02 | 1.10E-01 |
| CISD2  | -0.1618 | 1.77E-03 | 6.94E-03 |
| CISD3  | -0.0737 | 1.57E-01 | 2.62E-01 |
| CISH   | -0.1016 | 5.06E-02 | 1.09E-01 |
| CITED1 | 0.0030  | 9.53E-01 | 9.71E-01 |
| CITED2 | -0.0369 | 4.78E-01 | 6.07E-01 |
| CITED4 | 0.1221  | 1.87E-02 | 4.86E-02 |
| CIT    | 0.3438  | 9.90E-12 | 3.52E-10 |
| CIZ1   | 0.3925  | 4.07E-15 | 2.87E-13 |
| CKAP2L | 0.3887  | 7.83E-15 | 5.15E-13 |
| CKAP2  | 0.2754  | 7.00E-08 | 1.05E-06 |
| CKAP4  | 0.2173  | 2.42E-05 | 1.83E-04 |
| CKAP5  | 0.2740  | 8.23E-08 | 1.22E-06 |
| CKB    | -0.0426 | 4.13E-01 | 5.46E-01 |
| CKLF   | 0.1512  | 3.51E-03 | 1.23E-02 |
| CKMT1A | 0.1078  | 3.79E-02 | 8.64E-02 |
| CKMT1B | 0.1028  | 4.78E-02 | 1.04E-01 |
| CKMT2  | -0.0215 | 6.80E-01 | 7.78E-01 |
| CKM    | 0.1045  | 4.42E-02 | 9.75E-02 |
| CKS1B  | 0.4726  | 4.81E-22 | 1.65E-19 |
| CKS2   | 0.3514  | 3.19E-12 | 1.28E-10 |
| CLASP1 | -0.0533 | 3.06E-01 | 4.36E-01 |
| CLASP2 | 0.0858  | 9.91E-02 | 1.84E-01 |
| CLCA1  | 0.0504  | 3.33E-01 | 4.64E-01 |
| CLCA2  | -0.0831 | 1.10E-01 | 2.01E-01 |
| CLCA3P | 0.0087  | 8.68E-01 | 9.15E-01 |
| CLCA4  | 0.0586  | 2.60E-01 | 3.86E-01 |
| CLCC1  | -0.0351 | 5.00E-01 | 6.26E-01 |
| CLCF1  | 0.0955  | 6.62E-02 | 1.34E-01 |
| CLCN1  | -0.0156 | 7.64E-01 | 8.41E-01 |
| CLCN2  | 0.2292  | 8.19E-06 | 7.03E-05 |
| CLCN3  | -0.1782 | 5.64E-04 | 2.63E-03 |
| CLCN4  | -0.0527 | 3.11E-01 | 4.41E-01 |
| CLCN5  | -0.1193 | 2.15E-02 | 5.45E-02 |
| CLCN6  | 0.0205  | 6.95E-01 | 7.89E-01 |
| CLCN7  | -0.0130 | 8.03E-01 | 8.70E-01 |
| CLCNKA | 0.1707  | 9.63E-04 | 4.17E-03 |
| CLCNKB | 0.1306  | 1.18E-02 | 3.35E-02 |
| CLC    | -0.0414 | 4.27E-01 | 5.59E-01 |

|         |         |          |          |
|---------|---------|----------|----------|
| CLDN10  | 0.0055  | 9.16E-01 | 9.47E-01 |
| CLDN11  | 0.0754  | 1.47E-01 | 2.50E-01 |
| CLDN12  | -0.2334 | 5.53E-06 | 5.04E-05 |
| CLDN14  | -0.0734 | 1.58E-01 | 2.64E-01 |
| CLDN15  | -0.0296 | 5.70E-01 | 6.88E-01 |
| CLDN16  | -0.1400 | 6.92E-03 | 2.16E-02 |
| CLDN18  | 0.2229  | 1.47E-05 | 1.18E-04 |
| CLDN19  | -0.0130 | 8.03E-01 | 8.70E-01 |
| CLDN1   | 0.0661  | 2.04E-01 | 3.21E-01 |
| CLDN20  | 0.1596  | 2.05E-03 | 7.86E-03 |
| CLDN22  | 0.0217  | 6.77E-01 | 7.75E-01 |
| CLDN23  | -0.0807 | 1.21E-01 | 2.16E-01 |
| CLDN25  | 0.0721  | 1.66E-01 | 2.74E-01 |
| CLDN2   | -0.1458 | 4.88E-03 | 1.62E-02 |
| CLDN3   | 0.0192  | 7.12E-01 | 8.03E-01 |
| CLDN4   | 0.1581  | 2.26E-03 | 8.53E-03 |
| CLDN5   | -0.1255 | 1.56E-02 | 4.19E-02 |
| CLDN6   | 0.0495  | 3.42E-01 | 4.74E-01 |
| CLDN7   | 0.0659  | 2.05E-01 | 3.23E-01 |
| CLDN8   | -0.0734 | 1.58E-01 | 2.64E-01 |
| CLDN9   | 0.0390  | 4.53E-01 | 5.84E-01 |
| CLDND1  | 0.1596  | 2.05E-03 | 7.86E-03 |
| CLDND2  | -0.0944 | 6.92E-02 | 1.39E-01 |
| CLEC10A | -0.0888 | 8.77E-02 | 1.67E-01 |
| CLEC11A | -0.0350 | 5.02E-01 | 6.27E-01 |
| CLEC12A | -0.0610 | 2.41E-01 | 3.66E-01 |
| CLEC12B | 0.0785  | 1.31E-01 | 2.29E-01 |
| CLEC14A | -0.1960 | 1.45E-04 | 8.41E-04 |
| CLEC16A | -0.0203 | 6.97E-01 | 7.91E-01 |
| CLEC17A | 0.0467  | 3.70E-01 | 5.03E-01 |
| CLEC18A | 0.0156  | 7.64E-01 | 8.41E-01 |
| CLEC18B | 0.0260  | 6.17E-01 | 7.27E-01 |
| CLEC18C | 0.0477  | 3.60E-01 | 4.92E-01 |
| CLEC1A  | -0.2269 | 1.02E-05 | 8.58E-05 |
| CLEC1B  | -0.1690 | 1.08E-03 | 4.59E-03 |
| CLEC2A  | 0.0983  | 5.84E-02 | 1.21E-01 |
| CLEC2B  | -0.0959 | 6.51E-02 | 1.32E-01 |
| CLEC2D  | 0.1668  | 1.26E-03 | 5.22E-03 |
| CLEC2L  | 0.0761  | 1.44E-01 | 2.45E-01 |
| CLEC3A  | -0.0527 | 3.12E-01 | 4.41E-01 |
| CLEC3B  | -0.2969 | 5.51E-09 | 1.09E-07 |
| CLEC4A  | 0.0003  | 9.95E-01 | 9.97E-01 |
| CLEC4C  | 0.0459  | 3.78E-01 | 5.11E-01 |
| CLEC4D  | -0.0059 | 9.10E-01 | 9.43E-01 |

|          |         |          |          |
|----------|---------|----------|----------|
| CLEC4E   | -0.1150 | 2.67E-02 | 6.50E-02 |
| CLEC4F   | 0.1067  | 4.00E-02 | 9.01E-02 |
| CLEC4GP1 | -0.0554 | 2.88E-01 | 4.16E-01 |
| CLEC4G   | -0.1895 | 2.41E-04 | 1.29E-03 |
| CLEC4M   | -0.1782 | 5.65E-04 | 2.64E-03 |
| CLEC5A   | 0.0688  | 1.86E-01 | 2.99E-01 |
| CLEC6A   | 0.0102  | 8.44E-01 | 8.98E-01 |
| CLEC7A   | -0.0411 | 4.30E-01 | 5.62E-01 |
| CLEC9A   | -0.1240 | 1.68E-02 | 4.46E-02 |
| CLECL1   | 0.1154  | 2.62E-02 | 6.41E-02 |
| CLGN     | 0.2423  | 2.33E-06 | 2.38E-05 |
| CLIC1    | 0.2052  | 6.85E-05 | 4.43E-04 |
| CLIC2    | -0.0705 | 1.75E-01 | 2.86E-01 |
| CLIC3    | 0.0836  | 1.08E-01 | 1.97E-01 |
| CLIC4    | -0.1246 | 1.63E-02 | 4.35E-02 |
| CLIC5    | -0.0159 | 7.61E-01 | 8.39E-01 |
| CLIC6    | -0.0617 | 2.35E-01 | 3.59E-01 |
| CLINT1   | -0.0873 | 9.31E-02 | 1.76E-01 |
| CLIP1    | -0.0955 | 6.61E-02 | 1.34E-01 |
| CLIP2    | -0.0029 | 9.55E-01 | 9.72E-01 |
| CLIP3    | 0.0405  | 4.36E-01 | 5.68E-01 |
| CLIP4    | -0.0014 | 9.78E-01 | 9.86E-01 |
| CLK1     | 0.0748  | 1.51E-01 | 2.55E-01 |
| CLK2P    | 0.3775  | 5.18E-14 | 2.91E-12 |
| CLK2     | 0.5913  | 2.33E-36 | 4.22E-33 |
| CLK3     | 0.0668  | 1.99E-01 | 3.16E-01 |
| CLK4     | 0.0040  | 9.38E-01 | 9.61E-01 |
| CLLU1OS  | 0.0993  | 5.60E-02 | 1.17E-01 |
| CLLU1    | 0.0311  | 5.51E-01 | 6.71E-01 |
| CLMN     | -0.1210 | 1.98E-02 | 5.09E-02 |
| CLN3     | 0.1584  | 2.21E-03 | 8.35E-03 |
| CLN5     | -0.0907 | 8.10E-02 | 1.57E-01 |
| CLN6     | 0.1995  | 1.09E-04 | 6.56E-04 |
| CLN8     | 0.0157  | 7.63E-01 | 8.41E-01 |
| CLNK     | -0.0341 | 5.13E-01 | 6.37E-01 |
| CLNS1A   | -0.0644 | 2.16E-01 | 3.36E-01 |
| CLOCK    | -0.0700 | 1.79E-01 | 2.90E-01 |
| CLP1     | 0.0601  | 2.48E-01 | 3.73E-01 |
| CLPB     | -0.3387 | 2.08E-11 | 7.05E-10 |
| CLPP     | -0.1622 | 1.72E-03 | 6.78E-03 |
| CLPS     | 0.0165  | 7.51E-01 | 8.32E-01 |
| CLPTM1L  | 0.0080  | 8.77E-01 | 9.21E-01 |
| CLPTM1   | -0.1073 | 3.88E-02 | 8.80E-02 |
| CLPX     | -0.2148 | 3.02E-05 | 2.20E-04 |



|         |         |          |          |
|---------|---------|----------|----------|
| CLRN1OS | -0.0653 | 2.09E-01 | 3.28E-01 |
| CLRN1   | -0.0550 | 2.90E-01 | 4.19E-01 |
| CLRN2   | -0.0854 | 1.00E-01 | 1.86E-01 |
| CLRN3   | -0.0522 | 3.16E-01 | 4.46E-01 |
| CLSPN   | 0.3158  | 4.93E-10 | 1.25E-08 |
| CLSTN1  | 0.0994  | 5.58E-02 | 1.17E-01 |
| CLSTN2  | -0.1231 | 1.77E-02 | 4.64E-02 |
| CLSTN3  | -0.0319 | 5.40E-01 | 6.61E-01 |
| CLTA    | 0.2105  | 4.37E-05 | 3.02E-04 |
| CLTB    | -0.0381 | 4.65E-01 | 5.95E-01 |
| CLTCL1  | -0.0123 | 8.13E-01 | 8.77E-01 |
| CLTC    | 0.0903  | 8.25E-02 | 1.60E-01 |
| CLUAP1  | 0.1385  | 7.53E-03 | 2.31E-02 |
| CLUL1   | 0.1952  | 1.54E-04 | 8.85E-04 |
| CLU     | -0.1058 | 4.17E-02 | 9.32E-02 |
| CLVS1   | -0.0967 | 6.29E-02 | 1.29E-01 |
| CLVS2   | 0.0474  | 3.63E-01 | 4.95E-01 |
| CLYBL   | -0.2434 | 2.09E-06 | 2.16E-05 |
| CMA1    | -0.1673 | 1.22E-03 | 5.08E-03 |
| CMAH    | -0.1187 | 2.22E-02 | 5.59E-02 |
| CMAS    | 0.0428  | 4.11E-01 | 5.44E-01 |
| CMBL    | -0.1424 | 6.02E-03 | 1.92E-02 |
| CMC1    | -0.0126 | 8.08E-01 | 8.74E-01 |
| CMIP    | -0.0683 | 1.89E-01 | 3.03E-01 |
| CMKLR1  | -0.1159 | 2.56E-02 | 6.29E-02 |
| CMPK1   | -0.1783 | 5.61E-04 | 2.62E-03 |
| CMPK2   | -0.0148 | 7.76E-01 | 8.50E-01 |
| CMTM1   | 0.1183  | 2.27E-02 | 5.69E-02 |
| CMTM2   | 0.0147  | 7.78E-01 | 8.52E-01 |
| CMTM3   | 0.0435  | 4.03E-01 | 5.36E-01 |
| CMTM4   | 0.1555  | 2.67E-03 | 9.79E-03 |
| CMTM5   | -0.1438 | 5.51E-03 | 1.79E-02 |
| CMTM6   | -0.1848 | 3.45E-04 | 1.75E-03 |
| CMTM7   | 0.1347  | 9.39E-03 | 2.78E-02 |
| CMTM8   | 0.0058  | 9.11E-01 | 9.44E-01 |
| CMYA5   | 0.1700  | 1.01E-03 | 4.34E-03 |
| CN5H6.4 | 0.2622  | 3.00E-07 | 3.90E-06 |
| CNBD1   | 0.0428  | 4.12E-01 | 5.44E-01 |
| CNBP    | -0.1622 | 1.72E-03 | 6.78E-03 |
| CNDP1   | -0.1030 | 4.74E-02 | 1.03E-01 |
| CNDP2   | -0.2158 | 2.75E-05 | 2.04E-04 |
| CNFN    | 0.0751  | 1.49E-01 | 2.53E-01 |
| CNGA1   | -0.0593 | 2.54E-01 | 3.80E-01 |
| CNGA2   | -0.0567 | 2.76E-01 | 4.04E-01 |

|        |         |          |          |
|--------|---------|----------|----------|
| CNGA3  | 0.1044  | 4.44E-02 | 9.80E-02 |
| CNGA4  | 0.1425  | 5.96E-03 | 1.90E-02 |
| CNGB1  | 0.1258  | 1.53E-02 | 4.14E-02 |
| CNGB3  | 0.1127  | 3.00E-02 | 7.14E-02 |
| CNIH2  | 0.1780  | 5.71E-04 | 2.66E-03 |
| CNIH3  | -0.0006 | 9.91E-01 | 9.94E-01 |
| CNIH4  | 0.3335  | 4.35E-11 | 1.38E-09 |
| CNIH   | -0.2107 | 4.30E-05 | 2.98E-04 |
| CNKSR1 | 0.1782  | 5.62E-04 | 2.62E-03 |
| CNKSR2 | -0.0487 | 3.50E-01 | 4.82E-01 |
| CNKSR3 | 0.1149  | 2.69E-02 | 6.53E-02 |
| CNN1   | -0.1163 | 2.51E-02 | 6.17E-02 |
| CNN2   | 0.0854  | 1.00E-01 | 1.86E-01 |
| CNN3   | 0.0217  | 6.77E-01 | 7.75E-01 |
| CNNM1  | -0.0243 | 6.41E-01 | 7.47E-01 |
| CNNM2  | -0.1853 | 3.34E-04 | 1.71E-03 |
| CNNM3  | -0.0159 | 7.61E-01 | 8.39E-01 |
| CNNM4  | 0.1983  | 1.21E-04 | 7.17E-04 |
| CNOT10 | 0.3319  | 5.46E-11 | 1.70E-09 |
| CNOT1  | -0.1051 | 4.31E-02 | 9.57E-02 |
| CNOT2  | 0.2229  | 1.47E-05 | 1.18E-04 |
| CNOT3  | 0.2951  | 6.87E-09 | 1.33E-07 |
| CNOT4  | -0.0944 | 6.93E-02 | 1.39E-01 |
| CNOT6L | -0.0922 | 7.61E-02 | 1.50E-01 |
| CNOT6  | 0.2463  | 1.57E-06 | 1.69E-05 |
| CNOT7  | 0.0344  | 5.09E-01 | 6.34E-01 |
| CNOT8  | -0.0066 | 8.99E-01 | 9.36E-01 |
| CNO    | 0.1259  | 1.53E-02 | 4.13E-02 |
| CNPY1  | 0.0260  | 6.18E-01 | 7.27E-01 |
| CNPY2  | 0.1230  | 1.78E-02 | 4.67E-02 |
| CNPY3  | 0.2182  | 2.23E-05 | 1.70E-04 |
| CNPY4  | 0.0907  | 8.10E-02 | 1.57E-01 |
| CNP    | 0.2073  | 5.72E-05 | 3.80E-04 |
| CNR1   | -0.0044 | 9.32E-01 | 9.58E-01 |
| CNR2   | 0.0266  | 6.10E-01 | 7.21E-01 |
| CNRIP1 | -0.1876 | 2.79E-04 | 1.47E-03 |
| CNST   | 0.0419  | 4.21E-01 | 5.54E-01 |
| CNTD1  | 0.2074  | 5.72E-05 | 3.80E-04 |
| CNTD2  | 0.0485  | 3.51E-01 | 4.84E-01 |
| CNTFR  | 0.0097  | 8.52E-01 | 9.04E-01 |
| CNTF   | -0.0558 | 2.83E-01 | 4.12E-01 |
| CNTLN  | 0.0795  | 1.26E-01 | 2.23E-01 |
| CNTN1  | -0.1230 | 1.78E-02 | 4.67E-02 |
| CNTN2  | 0.0439  | 3.99E-01 | 5.32E-01 |

|         |         |          |          |
|---------|---------|----------|----------|
| CNTN3   | -0.0525 | 3.13E-01 | 4.42E-01 |
| CNTN4   | -0.1484 | 4.16E-03 | 1.42E-02 |
| CNTN5   | 0.0500  | 3.37E-01 | 4.68E-01 |
| CNTN6   | -0.0243 | 6.40E-01 | 7.46E-01 |
| CNTNAP1 | 0.1202  | 2.06E-02 | 5.25E-02 |
| CNTNAP2 | 0.0369  | 4.79E-01 | 6.08E-01 |
| CNTNAP3 | -0.0829 | 1.11E-01 | 2.01E-01 |
| CNTNAP4 | -0.0034 | 9.48E-01 | 9.68E-01 |
| CNTNAP5 | 0.1405  | 6.74E-03 | 2.11E-02 |
| CNTROB  | 0.1589  | 2.14E-03 | 8.15E-03 |
| COASY   | 0.0536  | 3.03E-01 | 4.33E-01 |
| COBLL1  | -0.2472 | 1.43E-06 | 1.55E-05 |
| COBL    | -0.1486 | 4.12E-03 | 1.41E-02 |
| COBRA1  | 0.2559  | 5.86E-07 | 7.02E-06 |
| COCH    | 0.0483  | 3.53E-01 | 4.85E-01 |
| COG1    | 0.3230  | 1.87E-10 | 5.25E-09 |
| COG2    | 0.2635  | 2.61E-07 | 3.45E-06 |
| COG3    | -0.0125 | 8.11E-01 | 8.76E-01 |
| COG4    | -0.0276 | 5.96E-01 | 7.09E-01 |
| COG5    | -0.0874 | 9.27E-02 | 1.75E-01 |
| COG6    | -0.0534 | 3.05E-01 | 4.35E-01 |
| COG7    | 0.0100  | 8.48E-01 | 9.00E-01 |
| COG8    | -0.2116 | 3.97E-05 | 2.78E-04 |
| COIL    | 0.3870  | 1.06E-14 | 6.86E-13 |
| COL10A1 | -0.0466 | 3.71E-01 | 5.04E-01 |
| COL11A1 | 0.0762  | 1.43E-01 | 2.45E-01 |
| COL11A2 | 0.0365  | 4.84E-01 | 6.12E-01 |
| COL12A1 | -0.0750 | 1.49E-01 | 2.53E-01 |
| COL13A1 | -0.0302 | 5.61E-01 | 6.79E-01 |
| COL14A1 | -0.1673 | 1.22E-03 | 5.07E-03 |
| COL15A1 | -0.1535 | 3.03E-03 | 1.09E-02 |
| COL16A1 | 0.0065  | 9.01E-01 | 9.37E-01 |
| COL17A1 | -0.0914 | 7.87E-02 | 1.54E-01 |
| COL18A1 | -0.2544 | 6.86E-07 | 8.10E-06 |
| COL19A1 | -0.0042 | 9.36E-01 | 9.60E-01 |
| COL1A1  | -0.0188 | 7.18E-01 | 8.09E-01 |
| COL1A2  | -0.0352 | 4.99E-01 | 6.25E-01 |
| COL20A1 | 0.1734  | 7.95E-04 | 3.53E-03 |
| COL21A1 | -0.0893 | 8.60E-02 | 1.65E-01 |
| COL22A1 | 0.1861  | 3.13E-04 | 1.62E-03 |
| COL23A1 | -0.0607 | 2.43E-01 | 3.68E-01 |
| COL24A1 | 0.1298  | 1.23E-02 | 3.46E-02 |
| COL25A1 | -0.2011 | 9.64E-05 | 5.91E-04 |
| COL27A1 | 0.0845  | 1.04E-01 | 1.91E-01 |

|          |         |          |          |
|----------|---------|----------|----------|
| COL28A1  | 0.1004  | 5.33E-02 | 1.13E-01 |
| COL29A1  | -0.0574 | 2.70E-01 | 3.98E-01 |
| COL2A1   | 0.1403  | 6.79E-03 | 2.12E-02 |
| COL3A1   | -0.0702 | 1.77E-01 | 2.88E-01 |
| COL4A1   | -0.1003 | 5.37E-02 | 1.14E-01 |
| COL4A2   | -0.0816 | 1.17E-01 | 2.10E-01 |
| COL4A3BP | -0.2560 | 5.82E-07 | 6.98E-06 |
| COL4A3   | -0.1008 | 5.23E-02 | 1.11E-01 |
| COL4A4   | -0.1502 | 3.73E-03 | 1.30E-02 |
| COL4A5   | 0.0933  | 7.27E-02 | 1.45E-01 |
| COL4A6   | 0.0822  | 1.14E-01 | 2.06E-01 |
| COL5A1   | -0.0322 | 5.36E-01 | 6.58E-01 |
| COL5A2   | -0.0523 | 3.15E-01 | 4.45E-01 |
| COL5A3   | -0.0669 | 1.99E-01 | 3.15E-01 |
| COL6A1   | -0.0603 | 2.47E-01 | 3.72E-01 |
| COL6A2   | -0.0751 | 1.49E-01 | 2.52E-01 |
| COL6A3   | -0.0576 | 2.69E-01 | 3.96E-01 |
| COL6A4P2 | 0.1201  | 2.07E-02 | 5.28E-02 |
| COL6A6   | -0.1274 | 1.41E-02 | 3.87E-02 |
| COL7A1   | 0.0515  | 3.23E-01 | 4.53E-01 |
| COL8A1   | -0.1787 | 5.42E-04 | 2.55E-03 |
| COL8A2   | 0.0028  | 9.58E-01 | 9.74E-01 |
| COL9A1   | 0.0139  | 7.90E-01 | 8.61E-01 |
| COL9A2   | 0.3226  | 1.98E-10 | 5.50E-09 |
| COL9A3   | 0.0558  | 2.83E-01 | 4.12E-01 |
| COLEC10  | -0.1847 | 3.48E-04 | 1.77E-03 |
| COLEC11  | -0.1562 | 2.55E-03 | 9.42E-03 |
| COLEC12  | -0.0313 | 5.48E-01 | 6.68E-01 |
| COLQ     | -0.0465 | 3.72E-01 | 5.05E-01 |
| COMMD10  | -0.0325 | 5.32E-01 | 6.54E-01 |
| COMMD1   | -0.0692 | 1.84E-01 | 2.96E-01 |
| COMMD2   | 0.2384  | 3.44E-06 | 3.35E-05 |
| COMMD3   | 0.0511  | 3.26E-01 | 4.57E-01 |
| COMMD4   | 0.0977  | 6.01E-02 | 1.24E-01 |
| COMMD5   | 0.0692  | 1.84E-01 | 2.96E-01 |
| COMMD6   | 0.0584  | 2.62E-01 | 3.88E-01 |
| COMMD7   | 0.0636  | 2.22E-01 | 3.43E-01 |
| COMMD8   | 0.0888  | 8.78E-02 | 1.67E-01 |
| COMMD9   | -0.0173 | 7.39E-01 | 8.24E-01 |
| COMP     | 0.0397  | 4.46E-01 | 5.77E-01 |
| COMTD1   | -0.1092 | 3.55E-02 | 8.19E-02 |
| COMT     | -0.1314 | 1.13E-02 | 3.23E-02 |
| COPA     | 0.3443  | 9.16E-12 | 3.32E-10 |
| COPB1    | 0.0649  | 2.12E-01 | 3.31E-01 |

|        |         |          |          |
|--------|---------|----------|----------|
| COPB2  | 0.0219  | 6.74E-01 | 7.73E-01 |
| COPE   | 0.0519  | 3.19E-01 | 4.49E-01 |
| COPG2  | -0.0216 | 6.78E-01 | 7.76E-01 |
| COPG   | -0.0142 | 7.85E-01 | 8.57E-01 |
| COPS2  | -0.0540 | 3.00E-01 | 4.29E-01 |
| COPS3  | 0.0897  | 8.45E-02 | 1.62E-01 |
| COPS4  | -0.0351 | 5.00E-01 | 6.26E-01 |
| COPS5  | -0.0356 | 4.95E-01 | 6.21E-01 |
| COPS6  | 0.0303  | 5.61E-01 | 6.79E-01 |
| COPS7A | -0.0353 | 4.98E-01 | 6.24E-01 |
| COPS7B | 0.2894  | 1.37E-08 | 2.46E-07 |
| COPS8  | 0.0027  | 9.58E-01 | 9.74E-01 |
| COPZ1  | 0.1540  | 2.95E-03 | 1.06E-02 |
| COPZ2  | -0.2277 | 9.44E-06 | 7.99E-05 |
| COQ10A | -0.1209 | 1.98E-02 | 5.10E-02 |
| COQ10B | -0.1872 | 2.89E-04 | 1.51E-03 |
| COQ2   | -0.1248 | 1.61E-02 | 4.31E-02 |
| COQ3   | 0.0568  | 2.75E-01 | 4.03E-01 |
| COQ4   | -0.2006 | 1.00E-04 | 6.10E-04 |
| COQ5   | -0.1032 | 4.70E-02 | 1.02E-01 |
| COQ6   | -0.3300 | 7.10E-11 | 2.15E-09 |
| COQ7   | -0.1325 | 1.06E-02 | 3.07E-02 |
| COQ9   | -0.3915 | 4.92E-15 | 3.40E-13 |
| CORIN  | -0.0766 | 1.41E-01 | 2.42E-01 |
| CORO1A | 0.0006  | 9.91E-01 | 9.95E-01 |
| CORO1B | -0.0923 | 7.57E-02 | 1.49E-01 |
| CORO1C | 0.0289  | 5.80E-01 | 6.96E-01 |
| CORO2A | 0.1988  | 1.15E-04 | 6.89E-04 |
| CORO2B | -0.0659 | 2.05E-01 | 3.23E-01 |
| CORO6  | 0.2257  | 1.13E-05 | 9.38E-05 |
| CORO7  | 0.2056  | 6.61E-05 | 4.29E-04 |
| CORT   | -0.0091 | 8.61E-01 | 9.10E-01 |
| COTL1  | -0.0515 | 3.22E-01 | 4.53E-01 |
| COX10  | -0.0232 | 6.56E-01 | 7.58E-01 |
| COX11  | 0.0888  | 8.76E-02 | 1.67E-01 |
| COX15  | -0.1720 | 8.81E-04 | 3.85E-03 |
| COX16  | -0.0390 | 4.54E-01 | 5.85E-01 |
| COX17  | -0.0331 | 5.25E-01 | 6.48E-01 |
| COX18  | -0.4153 | 6.74E-17 | 7.10E-15 |
| COX19  | 0.1948  | 1.59E-04 | 9.06E-04 |
| COX411 | -0.1955 | 1.51E-04 | 8.69E-04 |
| COX412 | -0.0600 | 2.49E-01 | 3.74E-01 |
| COX4NB | -0.1209 | 1.98E-02 | 5.09E-02 |
| COX5A  | -0.1076 | 3.84E-02 | 8.73E-02 |

|         |         |          |          |
|---------|---------|----------|----------|
| COX5B   | -0.0876 | 9.18E-02 | 1.74E-01 |
| COX6A1  | -0.0806 | 1.21E-01 | 2.16E-01 |
| COX6A2  | -0.0080 | 8.78E-01 | 9.21E-01 |
| COX6B1  | 0.0173  | 7.39E-01 | 8.24E-01 |
| COX6B2  | 0.0873  | 9.31E-02 | 1.76E-01 |
| COX6C   | -0.0417 | 4.23E-01 | 5.56E-01 |
| COX7A1  | -0.1489 | 4.05E-03 | 1.39E-02 |
| COX7A2L | -0.0349 | 5.02E-01 | 6.28E-01 |
| COX7A2  | 0.0550  | 2.91E-01 | 4.20E-01 |
| COX7B2  | 0.0128  | 8.06E-01 | 8.72E-01 |
| COX7B   | -0.0816 | 1.17E-01 | 2.10E-01 |
| COX7C   | -0.0786 | 1.31E-01 | 2.28E-01 |
| COX8A   | -0.0362 | 4.87E-01 | 6.15E-01 |
| COX8C   | -0.0052 | 9.21E-01 | 9.50E-01 |
| CP110   | 0.1126  | 3.02E-02 | 7.18E-02 |
| CPA1    | -0.0549 | 2.92E-01 | 4.21E-01 |
| CPA2    | 0.1130  | 2.96E-02 | 7.06E-02 |
| CPA3    | -0.1270 | 1.43E-02 | 3.93E-02 |
| CPA4    | 0.0770  | 1.39E-01 | 2.39E-01 |
| CPA5    | 0.0246  | 6.37E-01 | 7.43E-01 |
| CPA6    | 0.0811  | 1.19E-01 | 2.13E-01 |
| CPAMD8  | -0.0156 | 7.64E-01 | 8.41E-01 |
| CPB1    | -0.1182 | 2.27E-02 | 5.70E-02 |
| CPB2    | -0.1608 | 1.89E-03 | 7.34E-03 |
| CPD     | 0.0864  | 9.66E-02 | 1.81E-01 |
| CPEB1   | -0.0433 | 4.06E-01 | 5.39E-01 |
| CPEB2   | -0.0724 | 1.64E-01 | 2.72E-01 |
| CPEB3   | -0.3439 | 9.75E-12 | 3.48E-10 |
| CPEB4   | -0.1969 | 1.35E-04 | 7.88E-04 |
| CPE     | -0.0356 | 4.95E-01 | 6.21E-01 |
| CPLX1   | -0.0732 | 1.59E-01 | 2.66E-01 |
| CPLX2   | -0.0017 | 9.74E-01 | 9.84E-01 |
| CPLX3   | 0.1118  | 3.13E-02 | 7.39E-02 |
| CPLX4   | 0.0787  | 1.30E-01 | 2.28E-01 |
| CPM     | -0.0529 | 3.10E-01 | 4.39E-01 |
| CPN1    | -0.1020 | 4.96E-02 | 1.07E-01 |
| CPN2    | -0.1829 | 3.98E-04 | 1.97E-03 |
| CPNE1   | 0.1263  | 1.49E-02 | 4.05E-02 |
| CPNE2   | -0.1078 | 3.79E-02 | 8.64E-02 |
| CPNE3   | -0.0914 | 7.87E-02 | 1.54E-01 |
| CPNE4   | 0.1194  | 2.14E-02 | 5.42E-02 |
| CPNE5   | -0.0459 | 3.78E-01 | 5.11E-01 |
| CPNE6   | 0.0827  | 1.12E-01 | 2.03E-01 |
| CPNE7   | 0.1398  | 7.02E-03 | 2.18E-02 |

|         |         |          |          |
|---------|---------|----------|----------|
| CPNE8   | -0.1448 | 5.20E-03 | 1.70E-02 |
| CPNE9   | 0.0007  | 9.90E-01 | 9.94E-01 |
| CPOX    | -0.0561 | 2.81E-01 | 4.09E-01 |
| CPO     | -0.0089 | 8.64E-01 | 9.12E-01 |
| CPPED1  | -0.1550 | 2.76E-03 | 1.01E-02 |
| CPS1    | -0.2127 | 3.62E-05 | 2.57E-04 |
| CPSF1   | 0.0773  | 1.37E-01 | 2.37E-01 |
| CPSF2   | -0.1228 | 1.79E-02 | 4.70E-02 |
| CPSF3L  | 0.0510  | 3.28E-01 | 4.58E-01 |
| CPSF3   | 0.2102  | 4.50E-05 | 3.10E-04 |
| CPSF4L  | 0.2868  | 1.86E-08 | 3.24E-07 |
| CPSF4   | 0.1359  | 8.75E-03 | 2.62E-02 |
| CPSF6   | 0.4054  | 4.13E-16 | 3.64E-14 |
| CPSF7   | 0.1960  | 1.45E-04 | 8.37E-04 |
| CPT1A   | -0.1726 | 8.45E-04 | 3.72E-03 |
| CPT1B   | 0.2084  | 5.24E-05 | 3.52E-04 |
| CPT1C   | 0.0337  | 5.18E-01 | 6.42E-01 |
| CPT2    | -0.3195 | 3.01E-10 | 8.12E-09 |
| CPVL    | -0.0347 | 5.05E-01 | 6.30E-01 |
| CPXCR1  | -0.0092 | 8.59E-01 | 9.09E-01 |
| CPXM1   | -0.0102 | 8.45E-01 | 8.99E-01 |
| CPXM2   | -0.1759 | 6.68E-04 | 3.04E-03 |
| CPZ     | -0.0700 | 1.78E-01 | 2.89E-01 |
| CP      | -0.1525 | 3.23E-03 | 1.15E-02 |
| CR1L    | 0.0965  | 6.34E-02 | 1.30E-01 |
| CR1     | -0.1302 | 1.21E-02 | 3.41E-02 |
| CR2     | 0.1177  | 2.33E-02 | 5.82E-02 |
| CRABP1  | 0.0182  | 7.27E-01 | 8.14E-01 |
| CRABP2  | 0.0108  | 8.36E-01 | 8.93E-01 |
| CRADD   | -0.3203 | 2.68E-10 | 7.27E-09 |
| CRAMP1L | 0.2642  | 2.42E-07 | 3.21E-06 |
| CRAT    | -0.2038 | 7.71E-05 | 4.90E-04 |
| CRB1    | 0.0684  | 1.89E-01 | 3.02E-01 |
| CRB2    | 0.2096  | 4.74E-05 | 3.23E-04 |
| CRB3    | 0.0017  | 9.74E-01 | 9.84E-01 |
| CRBN    | -0.2190 | 2.08E-05 | 1.60E-04 |
| CRCP    | 0.0194  | 7.10E-01 | 8.02E-01 |
| CRCT1   | -0.1184 | 2.25E-02 | 5.66E-02 |
| CREB1   | 0.1750  | 7.11E-04 | 3.21E-03 |
| CREB3L1 | 0.0626  | 2.29E-01 | 3.51E-01 |
| CREB3L2 | -0.0546 | 2.94E-01 | 4.23E-01 |
| CREB3L3 | -0.0856 | 9.96E-02 | 1.85E-01 |
| CREB3L4 | 0.3602  | 8.25E-13 | 3.75E-11 |
| CREB3   | 0.1593  | 2.09E-03 | 8.00E-03 |

|          |         |          |          |
|----------|---------|----------|----------|
| CREB5    | 0.0178  | 7.33E-01 | 8.19E-01 |
| CREBBP   | 0.0771  | 1.38E-01 | 2.38E-01 |
| CREBL2   | -0.2384 | 3.43E-06 | 3.34E-05 |
| CREBZF   | 0.3132  | 6.89E-10 | 1.68E-08 |
| CREG1    | 0.0567  | 2.76E-01 | 4.05E-01 |
| CREG2    | 0.1681  | 1.15E-03 | 4.86E-03 |
| CRELD1   | -0.1254 | 1.56E-02 | 4.20E-02 |
| CRELD2   | 0.1437  | 5.56E-03 | 1.80E-02 |
| CREM     | -0.1018 | 5.00E-02 | 1.08E-01 |
| CRHBP    | -0.2098 | 4.63E-05 | 3.17E-04 |
| CRHR1    | -0.0016 | 9.75E-01 | 9.84E-01 |
| CRHR2    | -0.0487 | 3.50E-01 | 4.82E-01 |
| CRH      | -0.0117 | 8.22E-01 | 8.84E-01 |
| CRIM1    | -0.1151 | 2.66E-02 | 6.49E-02 |
| CRIP1    | 0.0597  | 2.51E-01 | 3.76E-01 |
| CRIP2    | -0.1265 | 1.47E-02 | 4.01E-02 |
| CRIP3    | 0.1289  | 1.29E-02 | 3.61E-02 |
| CRIPAK   | 0.2062  | 6.30E-05 | 4.12E-04 |
| CRIPT    | 0.1117  | 3.14E-02 | 7.42E-02 |
| CRISP1   | 0.1457  | 4.94E-03 | 1.63E-02 |
| CRISP2   | 0.0801  | 1.24E-01 | 2.19E-01 |
| CRISP3   | -0.0081 | 8.76E-01 | 9.20E-01 |
| CRISPLD1 | -0.0947 | 6.85E-02 | 1.38E-01 |
| CRISPLD2 | -0.1812 | 4.51E-04 | 2.18E-03 |
| CRKL     | 0.1660  | 1.34E-03 | 5.48E-03 |
| CRK      | -0.2619 | 3.09E-07 | 4.00E-06 |
| CRLF1    | -0.0695 | 1.82E-01 | 2.94E-01 |
| CRLF2    | -0.0172 | 7.41E-01 | 8.25E-01 |
| CRLF3    | 0.1691  | 1.08E-03 | 4.58E-03 |
| CRLS1    | -0.1946 | 1.62E-04 | 9.21E-04 |
| CRMP1    | 0.1533  | 3.07E-03 | 1.10E-02 |
| CRNKL1   | 0.1687  | 1.11E-03 | 4.70E-03 |
| CRNN     | -0.0513 | 3.24E-01 | 4.55E-01 |
| CROCCL1  | -0.0180 | 7.30E-01 | 8.17E-01 |
| CROCCL2  | 0.2652  | 2.18E-07 | 2.93E-06 |
| CROCC    | 0.2589  | 4.28E-07 | 5.34E-06 |
| CROT     | -0.0308 | 5.55E-01 | 6.74E-01 |
| CRP      | -0.0602 | 2.48E-01 | 3.73E-01 |
| CRTAC1   | -0.1642 | 1.51E-03 | 6.08E-03 |
| CRTAM    | -0.0318 | 5.42E-01 | 6.63E-01 |
| CRTAP    | 0.0096  | 8.55E-01 | 9.06E-01 |
| CRTC1    | 0.1432  | 5.74E-03 | 1.85E-02 |
| CRTC2    | 0.5468  | 2.61E-30 | 2.60E-27 |
| CRTC3    | 0.1250  | 1.60E-02 | 4.29E-02 |



|            |         |          |          |
|------------|---------|----------|----------|
| CRX        | -0.0081 | 8.76E-01 | 9.20E-01 |
| CRY1       | 0.0619  | 2.34E-01 | 3.58E-01 |
| CRY2       | -0.1487 | 4.11E-03 | 1.41E-02 |
| CRYAA      | -0.2071 | 5.84E-05 | 3.86E-04 |
| CRYAB      | -0.0978 | 5.99E-02 | 1.24E-01 |
| CRYBA1     | 0.0285  | 5.85E-01 | 7.00E-01 |
| CRYBA2     | 0.1227  | 1.80E-02 | 4.72E-02 |
| CRYBA4     | 0.0550  | 2.90E-01 | 4.19E-01 |
| CRYBB1     | -0.0305 | 5.58E-01 | 6.76E-01 |
| CRYBB2     | 0.0507  | 3.30E-01 | 4.60E-01 |
| CRYBB3     | -0.0242 | 6.42E-01 | 7.48E-01 |
| CRYBG3     | -0.1288 | 1.30E-02 | 3.63E-02 |
| CRYGA      | 0.1325  | 1.06E-02 | 3.06E-02 |
| CRYGC      | 0.0549  | 2.92E-01 | 4.21E-01 |
| CRYGD      | 0.0609  | 2.42E-01 | 3.66E-01 |
| CRYGN      | 0.0511  | 3.26E-01 | 4.57E-01 |
| CRYGS      | 0.1567  | 2.46E-03 | 9.15E-03 |
| CRYL1      | -0.2440 | 1.98E-06 | 2.08E-05 |
| CRYM       | -0.1247 | 1.62E-02 | 4.33E-02 |
| CRYZL1     | 0.1096  | 3.48E-02 | 8.07E-02 |
| CRYZ       | -0.2417 | 2.49E-06 | 2.52E-05 |
| CSAD       | -0.0679 | 1.92E-01 | 3.06E-01 |
| CSAG1      | 0.0093  | 8.58E-01 | 9.08E-01 |
| CSAG2      | 0.0583  | 2.62E-01 | 3.89E-01 |
| CSAG3      | 0.0858  | 9.89E-02 | 1.84E-01 |
| CSDAP1     | 0.0553  | 2.88E-01 | 4.17E-01 |
| CSDA       | 0.0255  | 6.25E-01 | 7.33E-01 |
| CSDC2      | -0.1219 | 1.89E-02 | 4.90E-02 |
| CSDE1      | -0.0163 | 7.54E-01 | 8.35E-01 |
| CSE1L      | 0.2592  | 4.12E-07 | 5.16E-06 |
| CSF1R      | -0.1140 | 2.81E-02 | 6.79E-02 |
| CSF1       | -0.0262 | 6.15E-01 | 7.25E-01 |
| CSF2RA     | 0.0311  | 5.50E-01 | 6.70E-01 |
| CSF2RB     | -0.0658 | 2.06E-01 | 3.24E-01 |
| CSF2       | 0.0840  | 1.06E-01 | 1.95E-01 |
| CSF3R      | -0.0038 | 9.42E-01 | 9.64E-01 |
| CSF3       | -0.1456 | 4.94E-03 | 1.63E-02 |
| CSGALNACT1 | -0.1328 | 1.04E-02 | 3.03E-02 |
| CSGALNACT2 | -0.0557 | 2.85E-01 | 4.14E-01 |
| CSH1       | 0.0609  | 2.42E-01 | 3.66E-01 |
| CSH2       | 0.0941  | 7.04E-02 | 1.41E-01 |
| CSK        | -0.0779 | 1.34E-01 | 2.33E-01 |
| CSMD1      | 0.0385  | 4.59E-01 | 5.90E-01 |
| CSMD2      | 0.0460  | 3.77E-01 | 5.10E-01 |

|          |         |          |          |
|----------|---------|----------|----------|
| CSMD3    | 0.0396  | 4.48E-01 | 5.79E-01 |
| CSN1S1   | 0.0387  | 4.57E-01 | 5.88E-01 |
| CSN1S2A  | 0.0355  | 4.96E-01 | 6.22E-01 |
| CSN2     | -0.0334 | 5.21E-01 | 6.45E-01 |
| CSN3     | 0.0706  | 1.75E-01 | 2.85E-01 |
| CSNK1A1L | 0.0360  | 4.89E-01 | 6.17E-01 |
| CSNK1A1P | -0.0530 | 3.09E-01 | 4.38E-01 |
| CSNK1A1  | -0.1626 | 1.68E-03 | 6.66E-03 |
| CSNK1D   | 0.2834  | 2.80E-08 | 4.62E-07 |
| CSNK1E   | 0.2262  | 1.08E-05 | 9.01E-05 |
| CSNK1G1  | 0.1736  | 7.84E-04 | 3.49E-03 |
| CSNK1G2  | 0.0636  | 2.22E-01 | 3.42E-01 |
| CSNK1G3  | -0.2139 | 3.26E-05 | 2.35E-04 |
| CSNK2A1P | 0.0355  | 4.96E-01 | 6.22E-01 |
| CSNK2A1  | 0.1551  | 2.73E-03 | 9.99E-03 |
| CSNK2A2  | -0.2351 | 4.69E-06 | 4.40E-05 |
| CSNK2B   | 0.1117  | 3.14E-02 | 7.42E-02 |
| CSPG4PY2 | 0.0422  | 4.18E-01 | 5.50E-01 |
| CSPG4    | -0.0084 | 8.72E-01 | 9.18E-01 |
| CSPG5    | 0.2042  | 7.46E-05 | 4.76E-04 |
| CSPP1    | 0.1679  | 1.17E-03 | 4.91E-03 |
| CSRNP1   | -0.1806 | 4.74E-04 | 2.27E-03 |
| CSRNP2   | 0.1540  | 2.94E-03 | 1.06E-02 |
| CSRNP3   | 0.0715  | 1.69E-01 | 2.78E-01 |
| CSRP1    | -0.0951 | 6.74E-02 | 1.36E-01 |
| CSRP2BP  | 0.0322  | 5.37E-01 | 6.59E-01 |
| CSRP2    | -0.0003 | 9.96E-01 | 9.97E-01 |
| CSRP3    | 0.0541  | 2.99E-01 | 4.28E-01 |
| CST11    | 0.0644  | 2.16E-01 | 3.36E-01 |
| CST1     | -0.0058 | 9.11E-01 | 9.44E-01 |
| CST2     | 0.0701  | 1.78E-01 | 2.89E-01 |
| CST3     | -0.1313 | 1.14E-02 | 3.24E-02 |
| CST4     | -0.0038 | 9.42E-01 | 9.64E-01 |
| CST5     | 0.0983  | 5.87E-02 | 1.22E-01 |
| CST6     | 0.0689  | 1.85E-01 | 2.98E-01 |
| CST7     | -0.0971 | 6.18E-02 | 1.27E-01 |
| CST8     | 0.1175  | 2.36E-02 | 5.88E-02 |
| CST9L    | 0.1658  | 1.35E-03 | 5.52E-03 |
| CST9     | 0.0826  | 1.12E-01 | 2.03E-01 |
| CSTA     | 0.0076  | 8.84E-01 | 9.26E-01 |
| CSTB     | 0.0274  | 5.99E-01 | 7.12E-01 |
| CSTF1    | 0.0419  | 4.21E-01 | 5.54E-01 |
| CSTF2T   | 0.1095  | 3.50E-02 | 8.10E-02 |
| CSTF2    | 0.3425  | 1.19E-11 | 4.16E-10 |

|         |         |          |          |
|---------|---------|----------|----------|
| CSTF3   | 0.2516  | 9.14E-07 | 1.05E-05 |
| CSTL1   | 0.0965  | 6.34E-02 | 1.30E-01 |
| CSTT    | 0.0108  | 8.36E-01 | 8.92E-01 |
| CS      | 0.0870  | 9.45E-02 | 1.78E-01 |
| CT45A1  | 0.0911  | 7.98E-02 | 1.55E-01 |
| CT45A2  | 0.0600  | 2.49E-01 | 3.74E-01 |
| CT45A3  | 0.0575  | 2.69E-01 | 3.97E-01 |
| CT45A4  | 0.0667  | 2.00E-01 | 3.16E-01 |
| CT45A5  | 0.1320  | 1.09E-02 | 3.14E-02 |
| CT45A6  | -0.0104 | 8.42E-01 | 8.97E-01 |
| CT47A10 | -0.0427 | 4.12E-01 | 5.45E-01 |
| CT47A11 | 0.0496  | 3.41E-01 | 4.72E-01 |
| CT47A1  | -0.0234 | 6.53E-01 | 7.56E-01 |
| CT47A2  | 0.0149  | 7.75E-01 | 8.50E-01 |
| CT47A6  | 0.0158  | 7.61E-01 | 8.39E-01 |
| CT47A7  | 0.0589  | 2.58E-01 | 3.84E-01 |
| CT47A9  | 0.0331  | 5.25E-01 | 6.48E-01 |
| CT47B1  | 0.0113  | 8.29E-01 | 8.88E-01 |
| CT62    | 0.1594  | 2.07E-03 | 7.94E-03 |
| CTAG1B  | 0.0687  | 1.86E-01 | 3.00E-01 |
| CTAG2   | 0.0585  | 2.61E-01 | 3.87E-01 |
| CTAGE1  | -0.1186 | 2.23E-02 | 5.61E-02 |
| CTAGE4  | 0.1922  | 1.97E-04 | 1.09E-03 |
| CTAGE5  | -0.2027 | 8.45E-05 | 5.30E-04 |
| CTAGE6  | 0.1377  | 7.89E-03 | 2.40E-02 |
| CTAGE9  | 0.1674  | 1.21E-03 | 5.05E-03 |
| CTBP1   | 0.1065  | 4.04E-02 | 9.08E-02 |
| CTBP2   | -0.0008 | 9.88E-01 | 9.93E-01 |
| CTBS    | -0.2669 | 1.79E-07 | 2.46E-06 |
| CTCFL   | 0.0512  | 3.25E-01 | 4.56E-01 |
| CTCF    | -0.0163 | 7.55E-01 | 8.35E-01 |
| CTDP1   | 0.0500  | 3.37E-01 | 4.68E-01 |
| CTDSP1  | -0.1007 | 5.26E-02 | 1.12E-01 |
| CTDSP2  | 0.1135  | 2.88E-02 | 6.93E-02 |
| CTDSPL2 | 0.1415  | 6.31E-03 | 2.00E-02 |
| CTDSPL  | 0.1937  | 1.74E-04 | 9.78E-04 |
| CTF1    | -0.0130 | 8.03E-01 | 8.70E-01 |
| CTGF    | -0.0239 | 6.46E-01 | 7.51E-01 |
| CTHRC1  | 0.1222  | 1.85E-02 | 4.83E-02 |
| CTH     | -0.1948 | 1.59E-04 | 9.07E-04 |
| CTLA4   | 0.0849  | 1.03E-01 | 1.89E-01 |
| CTNNA1  | -0.0034 | 9.48E-01 | 9.68E-01 |
| CTNNA2  | -0.0366 | 4.82E-01 | 6.11E-01 |
| CTNNA3  | -0.0813 | 1.18E-01 | 2.11E-01 |

|           |         |          |          |
|-----------|---------|----------|----------|
| CTNNAL1   | 0.1855  | 3.29E-04 | 1.69E-03 |
| CTNNB1    | -0.0741 | 1.54E-01 | 2.59E-01 |
| CTNNBIP1  | 0.0318  | 5.42E-01 | 6.63E-01 |
| CTNNBL1   | -0.0610 | 2.41E-01 | 3.66E-01 |
| CTNND1    | -0.0949 | 6.78E-02 | 1.37E-01 |
| CTNND2    | 0.2210  | 1.74E-05 | 1.37E-04 |
| CTNS      | -0.1344 | 9.53E-03 | 2.81E-02 |
| CTPS2     | 0.1608  | 1.89E-03 | 7.35E-03 |
| CTPS      | 0.0159  | 7.60E-01 | 8.38E-01 |
| CTR9      | -0.0956 | 6.58E-02 | 1.34E-01 |
| CTRB1     | -0.0232 | 6.56E-01 | 7.58E-01 |
| CTRB2     | 0.0041  | 9.37E-01 | 9.61E-01 |
| CTRC      | 0.0322  | 5.37E-01 | 6.59E-01 |
| CTRL      | 0.1377  | 7.93E-03 | 2.41E-02 |
| CTSA      | -0.0726 | 1.63E-01 | 2.70E-01 |
| CTSB      | -0.1793 | 5.21E-04 | 2.46E-03 |
| CTSC      | 0.0317  | 5.43E-01 | 6.63E-01 |
| CTSD      | -0.1992 | 1.12E-04 | 6.72E-04 |
| CTSE      | 0.2511  | 9.67E-07 | 1.10E-05 |
| CTSF      | -0.2285 | 8.79E-06 | 7.51E-05 |
| CTSG      | -0.1762 | 6.51E-04 | 2.98E-03 |
| CTSH      | 0.0058  | 9.12E-01 | 9.45E-01 |
| CTSK      | 0.0468  | 3.68E-01 | 5.01E-01 |
| CTSL1     | -0.0263 | 6.13E-01 | 7.24E-01 |
| CTSL2     | 0.3439  | 9.76E-12 | 3.48E-10 |
| CTSO      | -0.2819 | 3.31E-08 | 5.39E-07 |
| CTSS      | 0.0757  | 1.45E-01 | 2.48E-01 |
| CTSW      | -0.0930 | 7.37E-02 | 1.46E-01 |
| CTSZ      | -0.1390 | 7.35E-03 | 2.27E-02 |
| CTTNBP2NL | 0.0057  | 9.13E-01 | 9.45E-01 |
| CTTNBP2   | -0.0994 | 5.58E-02 | 1.17E-01 |
| CTTN      | 0.0099  | 8.49E-01 | 9.02E-01 |
| CTU1      | 0.1021  | 4.94E-02 | 1.07E-01 |
| CTU2      | -0.1434 | 5.67E-03 | 1.83E-02 |
| CTXN1     | 0.0362  | 4.87E-01 | 6.14E-01 |
| CTXN2     | 0.1257  | 1.54E-02 | 4.15E-02 |
| CTXN3     | 0.0422  | 4.18E-01 | 5.50E-01 |
| CUBN      | -0.0165 | 7.52E-01 | 8.33E-01 |
| CUEDC1    | 0.1176  | 2.35E-02 | 5.85E-02 |
| CUEDC2    | -0.1057 | 4.19E-02 | 9.35E-02 |
| CUL1      | -0.1059 | 4.15E-02 | 9.27E-02 |
| CUL2      | 0.1603  | 1.95E-03 | 7.53E-03 |
| CUL3      | 0.0271  | 6.02E-01 | 7.15E-01 |
| CUL4A     | 0.0438  | 4.00E-01 | 5.33E-01 |

|         |         |          |          |
|---------|---------|----------|----------|
| CUL4B   | 0.2175  | 2.39E-05 | 1.81E-04 |
| CUL5    | -0.0587 | 2.59E-01 | 3.86E-01 |
| CUL7    | 0.0739  | 1.55E-01 | 2.60E-01 |
| CUL9    | 0.1562  | 2.55E-03 | 9.42E-03 |
| CUTA    | 0.0939  | 7.07E-02 | 1.41E-01 |
| CUTC    | -0.0288 | 5.80E-01 | 6.97E-01 |
| CUX1    | -0.3689 | 2.09E-13 | 1.05E-11 |
| CUX2    | -0.1153 | 2.64E-02 | 6.45E-02 |
| CUZD1   | 0.2412  | 2.61E-06 | 2.62E-05 |
| CWC15   | 0.1547  | 2.81E-03 | 1.02E-02 |
| CWC22   | 0.2449  | 1.80E-06 | 1.90E-05 |
| CWC25   | 0.2217  | 1.64E-05 | 1.30E-04 |
| CWC27   | 0.2134  | 3.41E-05 | 2.45E-04 |
| CWF19L1 | 0.1273  | 1.42E-02 | 3.89E-02 |
| CWF19L2 | 0.1293  | 1.27E-02 | 3.54E-02 |
| CWH43   | -0.0860 | 9.81E-02 | 1.83E-01 |
| CX3CL1  | -0.1846 | 3.50E-04 | 1.78E-03 |
| CX3CR1  | -0.0898 | 8.42E-02 | 1.62E-01 |
| CXADRP2 | 0.0523  | 3.15E-01 | 4.45E-01 |
| CXADRP3 | 0.1134  | 2.90E-02 | 6.95E-02 |
| CXADR   | 0.0391  | 4.52E-01 | 5.83E-01 |
| CXCL10  | 0.0154  | 7.67E-01 | 8.43E-01 |
| CXCL11  | -0.0133 | 7.98E-01 | 8.66E-01 |
| CXCL12  | -0.1736 | 7.86E-04 | 3.50E-03 |
| CXCL13  | 0.0856  | 9.98E-02 | 1.86E-01 |
| CXCL14  | -0.0656 | 2.08E-01 | 3.26E-01 |
| CXCL16  | 0.0047  | 9.27E-01 | 9.54E-01 |
| CXCL17  | 0.0492  | 3.45E-01 | 4.77E-01 |
| CXCL1   | 0.1046  | 4.41E-02 | 9.74E-02 |
| CXCL2   | -0.1092 | 3.55E-02 | 8.19E-02 |
| CXCL3   | 0.1293  | 1.27E-02 | 3.56E-02 |
| CXCL5   | 0.1394  | 7.14E-03 | 2.21E-02 |
| CXCL6   | -0.0215 | 6.79E-01 | 7.77E-01 |
| CXCL9   | -0.0086 | 8.69E-01 | 9.16E-01 |
| CXCR1   | -0.0673 | 1.96E-01 | 3.11E-01 |
| CXCR2P1 | -0.0531 | 3.08E-01 | 4.38E-01 |
| CXCR2   | -0.0446 | 3.92E-01 | 5.25E-01 |
| CXCR3   | -0.0151 | 7.72E-01 | 8.47E-01 |
| CXCR4   | 0.0236  | 6.50E-01 | 7.54E-01 |
| CXCR5   | 0.0496  | 3.41E-01 | 4.73E-01 |
| CXCR6   | -0.0415 | 4.26E-01 | 5.58E-01 |
| CXCR7   | -0.1385 | 7.55E-03 | 2.32E-02 |
| CXXC1   | 0.2250  | 1.21E-05 | 9.92E-05 |
| CXXC4   | 0.0434  | 4.05E-01 | 5.38E-01 |

|          |         |          |          |
|----------|---------|----------|----------|
| CXXC5    | 0.0470  | 3.67E-01 | 5.00E-01 |
| CXorf1   | 0.0000  | 1.00E+00 | 1.00E+00 |
| CXorf21  | -0.0068 | 8.96E-01 | 9.34E-01 |
| CXorf22  | 0.1150  | 2.68E-02 | 6.52E-02 |
| CXorf23  | 0.0558  | 2.84E-01 | 4.13E-01 |
| CXorf26  | 0.0933  | 7.26E-02 | 1.44E-01 |
| CXorf27  | -0.0013 | 9.80E-01 | 9.88E-01 |
| CXorf30  | 0.1927  | 1.89E-04 | 1.05E-03 |
| CXorf36  | -0.1873 | 2.86E-04 | 1.50E-03 |
| CXorf38  | -0.1320 | 1.09E-02 | 3.14E-02 |
| CXorf40A | 0.1349  | 9.28E-03 | 2.75E-02 |
| CXorf40B | 0.2236  | 1.38E-05 | 1.11E-04 |
| CXorf41  | 0.0030  | 9.53E-01 | 9.71E-01 |
| CXorf42  | 0.1207  | 2.00E-02 | 5.14E-02 |
| CXorf48  | 0.1939  | 1.71E-04 | 9.63E-04 |
| CXorf49B | 0.0901  | 8.32E-02 | 1.61E-01 |
| CXorf50B | -0.0042 | 9.36E-01 | 9.60E-01 |
| CXorf51  | -0.0470 | 3.67E-01 | 5.00E-01 |
| CXorf56  | 0.0680  | 1.91E-01 | 3.05E-01 |
| CXorf57  | 0.3140  | 6.19E-10 | 1.54E-08 |
| CXorf58  | -0.0141 | 7.86E-01 | 8.58E-01 |
| CXorf59  | 0.1652  | 1.40E-03 | 5.71E-03 |
| CXorf61  | 0.1852  | 3.37E-04 | 1.72E-03 |
| CXorf64  | 0.0400  | 4.42E-01 | 5.74E-01 |
| CXorf65  | 0.1132  | 2.93E-02 | 7.01E-02 |
| CXorf66  | -0.1795 | 5.12E-04 | 2.43E-03 |
| CYB561D1 | 0.2273  | 9.81E-06 | 8.27E-05 |
| CYB561D2 | -0.0333 | 5.23E-01 | 6.46E-01 |
| CYB561   | 0.1742  | 7.52E-04 | 3.37E-03 |
| CYB5A    | -0.2349 | 4.80E-06 | 4.48E-05 |
| CYB5B    | -0.1285 | 1.33E-02 | 3.69E-02 |
| CYB5D1   | -0.1333 | 1.02E-02 | 2.96E-02 |
| CYB5D2   | -0.3637 | 4.76E-13 | 2.25E-11 |
| CYB5R1   | 0.1026  | 4.83E-02 | 1.05E-01 |
| CYB5R2   | 0.0532  | 3.07E-01 | 4.36E-01 |
| CYB5R3   | -0.1088 | 3.63E-02 | 8.34E-02 |
| CYB5R4   | 0.0733  | 1.59E-01 | 2.64E-01 |
| CYB5RL   | 0.2035  | 7.88E-05 | 4.98E-04 |
| CYBASC3  | -0.0850 | 1.02E-01 | 1.88E-01 |
| CYBA     | 0.0677  | 1.93E-01 | 3.08E-01 |
| CYBB     | -0.0521 | 3.17E-01 | 4.47E-01 |
| CYBRD1   | -0.1140 | 2.81E-02 | 6.79E-02 |
| CYC1     | -0.0453 | 3.84E-01 | 5.17E-01 |
| CYCSP52  | 0.0590  | 2.57E-01 | 3.83E-01 |

|          |         |          |          |
|----------|---------|----------|----------|
| CYCS     | -0.0780 | 1.34E-01 | 2.32E-01 |
| CYFIP1   | -0.1067 | 4.00E-02 | 9.01E-02 |
| CYFIP2   | -0.0888 | 8.75E-02 | 1.67E-01 |
| CYGB     | -0.2103 | 4.45E-05 | 3.06E-04 |
| CYHR1    | -0.0216 | 6.79E-01 | 7.76E-01 |
| CYLC1    | -0.0112 | 8.30E-01 | 8.89E-01 |
| CYLC2    | 0.0575  | 2.69E-01 | 3.97E-01 |
| CYLD     | -0.2007 | 9.97E-05 | 6.07E-04 |
| CYMP     | 0.0501  | 3.36E-01 | 4.67E-01 |
| CYP11A1  | -0.2318 | 6.44E-06 | 5.75E-05 |
| CYP11B1  | 0.0163  | 7.55E-01 | 8.35E-01 |
| CYP11B2  | -0.0059 | 9.09E-01 | 9.43E-01 |
| CYP17A1  | -0.1929 | 1.86E-04 | 1.03E-03 |
| CYP19A1  | 0.1325  | 1.06E-02 | 3.07E-02 |
| CYP1A1   | -0.1412 | 6.44E-03 | 2.03E-02 |
| CYP1A2   | -0.2171 | 2.47E-05 | 1.86E-04 |
| CYP1B1   | -0.0440 | 3.98E-01 | 5.31E-01 |
| CYP20A1  | 0.0351  | 5.01E-01 | 6.26E-01 |
| CYP21A2  | 0.0708  | 1.74E-01 | 2.84E-01 |
| CYP24A1  | 0.0915  | 7.84E-02 | 1.53E-01 |
| CYP26A1  | -0.1892 | 2.48E-04 | 1.32E-03 |
| CYP26B1  | 0.1877  | 2.78E-04 | 1.46E-03 |
| CYP26C1  | 0.0250  | 6.32E-01 | 7.39E-01 |
| CYP27A1  | -0.1455 | 4.99E-03 | 1.64E-02 |
| CYP27B1  | 0.1565  | 2.51E-03 | 9.29E-03 |
| CYP27C1  | 0.0143  | 7.84E-01 | 8.56E-01 |
| CYP2A13  | -0.1057 | 4.20E-02 | 9.36E-02 |
| CYP2A6   | -0.1968 | 1.36E-04 | 7.92E-04 |
| CYP2A7   | -0.1858 | 3.20E-04 | 1.65E-03 |
| CYP2B6   | -0.2096 | 4.71E-05 | 3.21E-04 |
| CYP2B7P1 | -0.1564 | 2.52E-03 | 9.32E-03 |
| CYP2C18  | -0.0999 | 5.46E-02 | 1.15E-01 |
| CYP2C19  | -0.1129 | 2.97E-02 | 7.08E-02 |
| CYP2C8   | -0.2537 | 7.34E-07 | 8.60E-06 |
| CYP2C9   | -0.1574 | 2.36E-03 | 8.82E-03 |
| CYP2D6   | -0.0541 | 2.99E-01 | 4.28E-01 |
| CYP2D7P1 | -0.0091 | 8.61E-01 | 9.10E-01 |
| CYP2E1   | -0.1721 | 8.71E-04 | 3.81E-03 |
| CYP2F1   | 0.0974  | 6.10E-02 | 1.26E-01 |
| CYP2J2   | -0.2692 | 1.40E-07 | 1.96E-06 |
| CYP2R1   | 0.1527  | 3.19E-03 | 1.14E-02 |
| CYP2S1   | 0.0453  | 3.84E-01 | 5.17E-01 |
| CYP2U1   | -0.2530 | 7.96E-07 | 9.25E-06 |
| CYP2W1   | 0.2510  | 9.78E-07 | 1.11E-05 |

|          |         |          |          |
|----------|---------|----------|----------|
| CYP39A1  | -0.2939 | 7.94E-09 | 1.51E-07 |
| CYP3A43  | -0.1312 | 1.14E-02 | 3.25E-02 |
| CYP3A4   | -0.2318 | 6.43E-06 | 5.75E-05 |
| CYP3A5   | 0.0147  | 7.78E-01 | 8.52E-01 |
| CYP3A7   | -0.0267 | 6.08E-01 | 7.20E-01 |
| CYP46A1  | -0.1496 | 3.87E-03 | 1.34E-02 |
| CYP4A11  | -0.3077 | 1.41E-09 | 3.24E-08 |
| CYP4A22  | -0.2716 | 1.08E-07 | 1.55E-06 |
| CYP4B1   | -0.0654 | 2.09E-01 | 3.28E-01 |
| CYP4F11  | -0.1379 | 7.83E-03 | 2.39E-02 |
| CYP4F12  | -0.1250 | 1.60E-02 | 4.28E-02 |
| CYP4F22  | 0.0224  | 6.67E-01 | 7.67E-01 |
| CYP4F2   | -0.2607 | 3.53E-07 | 4.50E-06 |
| CYP4F3   | -0.2085 | 5.19E-05 | 3.50E-04 |
| CYP4F8   | -0.0325 | 5.33E-01 | 6.55E-01 |
| CYP4V2   | -0.3124 | 7.63E-10 | 1.86E-08 |
| CYP4X1   | -0.1546 | 2.82E-03 | 1.03E-02 |
| CYP4Z1   | -0.0488 | 3.49E-01 | 4.81E-01 |
| CYP4Z2P  | 0.0990  | 5.68E-02 | 1.19E-01 |
| CYP51A1  | -0.1819 | 4.31E-04 | 2.10E-03 |
| CYP7A1   | -0.0927 | 7.46E-02 | 1.48E-01 |
| CYP7B1   | -0.2221 | 1.58E-05 | 1.26E-04 |
| CYP8B1   | -0.2650 | 2.22E-07 | 2.98E-06 |
| CYR61    | -0.1786 | 5.47E-04 | 2.57E-03 |
| CYS1     | -0.0157 | 7.63E-01 | 8.40E-01 |
| CYSLTR1  | -0.1905 | 2.23E-04 | 1.21E-03 |
| CYSLTR2  | -0.0549 | 2.91E-01 | 4.20E-01 |
| CYTH1    | 0.0670  | 1.98E-01 | 3.14E-01 |
| CYTH2    | 0.1344  | 9.54E-03 | 2.81E-02 |
| CYTH3    | -0.0161 | 7.58E-01 | 8.37E-01 |
| CYTH4    | -0.0136 | 7.94E-01 | 8.63E-01 |
| CYTIP    | -0.0556 | 2.86E-01 | 4.14E-01 |
| CYTL1    | -0.0805 | 1.22E-01 | 2.17E-01 |
| CYTSA    | -0.0340 | 5.14E-01 | 6.38E-01 |
| CYTSB    | 0.0433  | 4.06E-01 | 5.39E-01 |
| CYYR1    | -0.2582 | 4.61E-07 | 5.70E-06 |
| CYorf15A | -0.0363 | 4.86E-01 | 6.14E-01 |
| CYorf15B | -0.0173 | 7.40E-01 | 8.25E-01 |
| D2HGDH   | -0.1714 | 9.14E-04 | 3.98E-03 |
| D4S234E  | -0.0905 | 8.16E-02 | 1.58E-01 |
| DAAM1    | -0.1567 | 2.47E-03 | 9.17E-03 |
| DAAM2    | -0.1869 | 2.96E-04 | 1.54E-03 |
| DAB1     | -0.1213 | 1.94E-02 | 5.01E-02 |
| DAB2IP   | 0.1142  | 2.78E-02 | 6.72E-02 |



|        |         |          |          |
|--------|---------|----------|----------|
| DAB2   | -0.0250 | 6.32E-01 | 7.39E-01 |
| DACH1  | -0.0627 | 2.28E-01 | 3.50E-01 |
| DACH2  | -0.0089 | 8.64E-01 | 9.12E-01 |
| DACT1  | -0.0571 | 2.73E-01 | 4.01E-01 |
| DACT2  | 0.1129  | 2.97E-02 | 7.08E-02 |
| DACT3  | -0.0508 | 3.29E-01 | 4.60E-01 |
| DAD1L  | 0.1161  | 2.53E-02 | 6.20E-02 |
| DAD1   | 0.1009  | 5.21E-02 | 1.11E-01 |
| DAG1   | 0.0476  | 3.61E-01 | 4.93E-01 |
| DAGLA  | 0.0261  | 6.16E-01 | 7.26E-01 |
| DAGLB  | -0.0207 | 6.91E-01 | 7.87E-01 |
| DAK    | -0.2419 | 2.43E-06 | 2.47E-05 |
| DALRD3 | 0.0303  | 5.61E-01 | 6.79E-01 |
| DAND5  | 0.2843  | 2.52E-08 | 4.22E-07 |
| DAO    | -0.0839 | 1.07E-01 | 1.95E-01 |
| DAP3   | 0.3600  | 8.57E-13 | 3.88E-11 |
| DAPK1  | 0.0407  | 4.35E-01 | 5.67E-01 |
| DAPK2  | -0.0089 | 8.64E-01 | 9.12E-01 |
| DAPK3  | -0.0060 | 9.08E-01 | 9.42E-01 |
| DAPL1  | 0.0593  | 2.55E-01 | 3.80E-01 |
| DAPP1  | -0.0433 | 4.06E-01 | 5.39E-01 |
| DAP    | -0.1092 | 3.56E-02 | 8.20E-02 |
| DARC   | -0.2424 | 2.31E-06 | 2.37E-05 |
| DARS2  | 0.3073  | 1.48E-09 | 3.39E-08 |
| DARS   | 0.1067  | 4.00E-02 | 9.01E-02 |
| DAXX   | 0.2432  | 2.13E-06 | 2.20E-05 |
| DAZ1   | 0.0889  | 8.74E-02 | 1.67E-01 |
| DAZ2   | 0.1641  | 1.52E-03 | 6.11E-03 |
| DAZ3   | 0.0863  | 9.71E-02 | 1.82E-01 |
| DAZAP1 | 0.3316  | 5.65E-11 | 1.75E-09 |
| DAZAP2 | -0.0170 | 7.45E-01 | 8.28E-01 |
| DAZL   | 0.0041  | 9.37E-01 | 9.60E-01 |
| DBC1   | -0.0251 | 6.30E-01 | 7.38E-01 |
| DBF4B  | 0.4403  | 4.99E-19 | 9.94E-17 |
| DBF4   | 0.2892  | 1.40E-08 | 2.51E-07 |
| DBH    | -0.0775 | 1.36E-01 | 2.36E-01 |
| DBI    | -0.0641 | 2.18E-01 | 3.38E-01 |
| DBN1   | 0.0822  | 1.14E-01 | 2.06E-01 |
| DBNDD1 | -0.1216 | 1.92E-02 | 4.97E-02 |
| DBNDD2 | 0.1904  | 2.26E-04 | 1.23E-03 |
| DBNL   | -0.0161 | 7.58E-01 | 8.38E-01 |
| DBP    | 0.0909  | 8.04E-02 | 1.56E-01 |
| DBR1   | 0.2026  | 8.47E-05 | 5.30E-04 |
| DBT    | -0.2912 | 1.11E-08 | 2.04E-07 |

|          |         |          |          |
|----------|---------|----------|----------|
| DBX1     | 0.0322  | 5.37E-01 | 6.59E-01 |
| DBX2     | 0.0194  | 7.10E-01 | 8.02E-01 |
| DCAF10   | 0.0100  | 8.47E-01 | 9.00E-01 |
| DCAF11   | -0.1756 | 6.81E-04 | 3.09E-03 |
| DCAF12L1 | 0.1115  | 3.18E-02 | 7.49E-02 |
| DCAF12L2 | 0.1016  | 5.06E-02 | 1.08E-01 |
| DCAF12   | 0.1288  | 1.30E-02 | 3.62E-02 |
| DCAF13   | 0.1009  | 5.20E-02 | 1.11E-01 |
| DCAF15   | 0.1197  | 2.11E-02 | 5.37E-02 |
| DCAF16   | 0.2335  | 5.46E-06 | 4.99E-05 |
| DCAF17   | 0.0559  | 2.83E-01 | 4.12E-01 |
| DCAF4L1  | 0.1349  | 9.28E-03 | 2.75E-02 |
| DCAF4L2  | -0.0197 | 7.05E-01 | 7.98E-01 |
| DCAF4    | 0.0437  | 4.01E-01 | 5.34E-01 |
| DCAF5    | -0.1028 | 4.78E-02 | 1.04E-01 |
| DCAF6    | 0.1267  | 1.46E-02 | 3.99E-02 |
| DCAF7    | 0.2027  | 8.41E-05 | 5.28E-04 |
| DCAF8L1  | -0.0214 | 6.81E-01 | 7.78E-01 |
| DCAF8L2  | 0.0545  | 2.96E-01 | 4.25E-01 |
| DCAF8    | 0.0710  | 1.72E-01 | 2.82E-01 |
| DCAKD    | 0.0274  | 5.98E-01 | 7.12E-01 |
| DCBLD1   | -0.0395 | 4.48E-01 | 5.79E-01 |
| DCBLD2   | 0.0186  | 7.20E-01 | 8.10E-01 |
| DCC      | -0.0115 | 8.25E-01 | 8.85E-01 |
| DCDC1    | 0.1082  | 3.73E-02 | 8.53E-02 |
| DCDC2B   | 0.1049  | 4.34E-02 | 9.62E-02 |
| DCDC2    | 0.0293  | 5.73E-01 | 6.91E-01 |
| DCHS1    | -0.1042 | 4.49E-02 | 9.88E-02 |
| DCHS2    | 0.0116  | 8.24E-01 | 8.85E-01 |
| DCI      | -0.1683 | 1.14E-03 | 4.80E-03 |
| DCK      | 0.1669  | 1.25E-03 | 5.19E-03 |
| DCLK1    | -0.0836 | 1.08E-01 | 1.97E-01 |
| DCLK2    | -0.0296 | 5.70E-01 | 6.87E-01 |
| DCLK3    | 0.0563  | 2.79E-01 | 4.08E-01 |
| DCLRE1A  | 0.0785  | 1.31E-01 | 2.29E-01 |
| DCLRE1B  | 0.2405  | 2.79E-06 | 2.78E-05 |
| DCLRE1C  | 0.3388  | 2.04E-11 | 6.92E-10 |
| DCN      | -0.1472 | 4.48E-03 | 1.51E-02 |
| DGP1A    | 0.1154  | 2.63E-02 | 6.42E-02 |
| DGP1B    | 0.1518  | 3.38E-03 | 1.19E-02 |
| DGP2     | 0.1101  | 3.41E-02 | 7.93E-02 |
| DCPS     | 0.0679  | 1.92E-01 | 3.06E-01 |
| DCST1    | 0.1371  | 8.20E-03 | 2.48E-02 |
| DCST2    | 0.3546  | 1.98E-12 | 8.27E-11 |

|         |         |          |          |
|---------|---------|----------|----------|
| DCTD    | -0.2738 | 8.36E-08 | 1.24E-06 |
| DCTN1   | 0.1499  | 3.80E-03 | 1.32E-02 |
| DCTN2   | -0.0088 | 8.66E-01 | 9.13E-01 |
| DCTN3   | 0.0620  | 2.34E-01 | 3.57E-01 |
| DCTN4   | 0.0376  | 4.70E-01 | 6.00E-01 |
| DCTN5   | 0.1979  | 1.25E-04 | 7.38E-04 |
| DCTN6   | -0.0528 | 3.10E-01 | 4.40E-01 |
| DCTPP1  | 0.1427  | 5.91E-03 | 1.89E-02 |
| DCT     | -0.0889 | 8.72E-02 | 1.67E-01 |
| DCUN1D1 | -0.1000 | 5.42E-02 | 1.15E-01 |
| DCUN1D2 | 0.2764  | 6.23E-08 | 9.51E-07 |
| DCUN1D3 | -0.2209 | 1.76E-05 | 1.38E-04 |
| DCUN1D4 | 0.0003  | 9.95E-01 | 9.97E-01 |
| DCUN1D5 | 0.1782  | 5.62E-04 | 2.63E-03 |
| DCXR    | -0.2485 | 1.26E-06 | 1.39E-05 |
| DCX     | 0.0856  | 9.98E-02 | 1.86E-01 |
| DDA1    | 0.1151  | 2.67E-02 | 6.50E-02 |
| DDAH1   | -0.1114 | 3.19E-02 | 7.51E-02 |
| DDAH2   | 0.0525  | 3.13E-01 | 4.42E-01 |
| DDB1    | -0.0936 | 7.19E-02 | 1.43E-01 |
| DDB2    | -0.0665 | 2.01E-01 | 3.17E-01 |
| DDC     | -0.0645 | 2.15E-01 | 3.35E-01 |
| DDHD1   | 0.1942  | 1.68E-04 | 9.46E-04 |
| DDHD2   | 0.0312  | 5.50E-01 | 6.70E-01 |
| DDI1    | 0.0217  | 6.77E-01 | 7.75E-01 |
| DDI2    | -0.1645 | 1.47E-03 | 5.96E-03 |
| DDIT3   | 0.1201  | 2.07E-02 | 5.28E-02 |
| DDIT4L  | 0.0226  | 6.65E-01 | 7.65E-01 |
| DDIT4   | -0.0644 | 2.16E-01 | 3.36E-01 |
| DDN     | 0.0880  | 9.06E-02 | 1.72E-01 |
| DDOST   | 0.1210  | 1.97E-02 | 5.08E-02 |
| DDO     | -0.0896 | 8.49E-02 | 1.63E-01 |
| DDR1    | 0.1802  | 4.87E-04 | 2.33E-03 |
| DDR2    | -0.0243 | 6.41E-01 | 7.47E-01 |
| DDRGK1  | -0.1465 | 4.70E-03 | 1.57E-02 |
| DDTL    | -0.1210 | 1.98E-02 | 5.09E-02 |
| DDT     | -0.1082 | 3.72E-02 | 8.51E-02 |
| DDX10   | 0.1048  | 4.36E-02 | 9.65E-02 |
| DDX11L2 | -0.1022 | 4.91E-02 | 1.06E-01 |
| DDX11   | 0.3525  | 2.68E-12 | 1.10E-10 |
| DDX12   | 0.4550  | 2.36E-20 | 6.28E-18 |
| DDX17   | 0.2893  | 1.38E-08 | 2.48E-07 |
| DDX18   | 0.1080  | 3.76E-02 | 8.58E-02 |
| DDX19A  | -0.2019 | 9.02E-05 | 5.59E-04 |

|        |         |          |          |
|--------|---------|----------|----------|
| DDX19B | -0.3106 | 9.66E-10 | 2.30E-08 |
| DDX1   | 0.0755  | 1.47E-01 | 2.50E-01 |
| DDX20  | 0.2488  | 1.22E-06 | 1.35E-05 |
| DDX21  | -0.0261 | 6.17E-01 | 7.26E-01 |
| DDX23  | 0.2994  | 4.05E-09 | 8.33E-08 |
| DDX24  | -0.1061 | 4.11E-02 | 9.21E-02 |
| DDX25  | 0.0772  | 1.38E-01 | 2.37E-01 |
| DDX26B | 0.0347  | 5.06E-01 | 6.30E-01 |
| DDX27  | 0.2702  | 1.26E-07 | 1.79E-06 |
| DDX28  | -0.1845 | 3.54E-04 | 1.79E-03 |
| DDX31  | 0.3173  | 4.00E-10 | 1.04E-08 |
| DDX39  | 0.2631  | 2.73E-07 | 3.59E-06 |
| DDX3X  | -0.0834 | 1.09E-01 | 1.99E-01 |
| DDX3Y  | -0.0240 | 6.45E-01 | 7.50E-01 |
| DDX41  | 0.0066  | 9.00E-01 | 9.37E-01 |
| DDX42  | 0.3004  | 3.56E-09 | 7.40E-08 |
| DDX43  | 0.0082  | 8.75E-01 | 9.19E-01 |
| DDX46  | 0.2321  | 6.29E-06 | 5.65E-05 |
| DDX47  | 0.1490  | 4.03E-03 | 1.38E-02 |
| DDX49  | 0.1235  | 1.73E-02 | 4.57E-02 |
| DDX4   | 0.0617  | 2.36E-01 | 3.59E-01 |
| DDX50  | 0.1838  | 3.72E-04 | 1.86E-03 |
| DDX51  | 0.2125  | 3.69E-05 | 2.62E-04 |
| DDX52  | 0.3010  | 3.31E-09 | 6.93E-08 |
| DDX53  | -0.0659 | 2.06E-01 | 3.23E-01 |
| DDX54  | 0.0519  | 3.18E-01 | 4.48E-01 |
| DDX55  | 0.3733  | 1.03E-13 | 5.46E-12 |
| DDX56  | 0.0839  | 1.07E-01 | 1.95E-01 |
| DDX58  | 0.0366  | 4.82E-01 | 6.10E-01 |
| DDX59  | 0.2595  | 4.02E-07 | 5.05E-06 |
| DDX5   | 0.0819  | 1.15E-01 | 2.08E-01 |
| DDX60L | -0.1387 | 7.45E-03 | 2.29E-02 |
| DDX60  | -0.1486 | 4.13E-03 | 1.41E-02 |
| DDX6   | 0.0048  | 9.27E-01 | 9.54E-01 |
| DEAF1  | 0.1190  | 2.19E-02 | 5.52E-02 |
| 1-Dec  | -0.0273 | 6.00E-01 | 7.13E-01 |
| DECR1  | -0.3771 | 5.57E-14 | 3.10E-12 |
| DECR2  | -0.1442 | 5.41E-03 | 1.76E-02 |
| DEDD2  | 0.1018  | 5.00E-02 | 1.08E-01 |
| DEDD   | 0.4565  | 1.70E-20 | 4.70E-18 |
| DEF6   | 0.0342  | 5.11E-01 | 6.36E-01 |
| DEF8   | -0.1132 | 2.92E-02 | 7.00E-02 |
| DEFA1B | -0.0871 | 9.40E-02 | 1.77E-01 |
| DEFA4  | 0.0554  | 2.87E-01 | 4.16E-01 |

|            |         |          |          |
|------------|---------|----------|----------|
| DEFA5      | -0.0141 | 7.86E-01 | 8.58E-01 |
| DEFA6      | 0.0423  | 4.17E-01 | 5.50E-01 |
| DEFB103B   | -0.0121 | 8.16E-01 | 8.79E-01 |
| DEFB109P1B | -0.0457 | 3.80E-01 | 5.14E-01 |
| DEFB118    | 0.1337  | 9.94E-03 | 2.91E-02 |
| DEFB123    | -0.0228 | 6.62E-01 | 7.63E-01 |
| DEFB124    | 0.0913  | 7.91E-02 | 1.54E-01 |
| DEFB125    | 0.0272  | 6.01E-01 | 7.14E-01 |
| DEFB126    | 0.0859  | 9.85E-02 | 1.84E-01 |
| DEFB131    | 0.0766  | 1.41E-01 | 2.42E-01 |
| DEFB132    | -0.2168 | 2.54E-05 | 1.90E-04 |
| DEFB1      | 0.0232  | 6.56E-01 | 7.58E-01 |
| DEFB4A     | -0.0297 | 5.69E-01 | 6.87E-01 |
| DEGS1      | 0.1951  | 1.56E-04 | 8.93E-04 |
| DEGS2      | 0.1341  | 9.73E-03 | 2.86E-02 |
| DEK        | 0.3003  | 3.59E-09 | 7.45E-08 |
| DEM1       | 0.2992  | 4.15E-09 | 8.50E-08 |
| DENND1A    | 0.0996  | 5.53E-02 | 1.16E-01 |
| DENND1B    | 0.1647  | 1.45E-03 | 5.88E-03 |
| DENND1C    | -0.0547 | 2.94E-01 | 4.23E-01 |
| DENND2A    | -0.0595 | 2.53E-01 | 3.78E-01 |
| DENND2C    | 0.0625  | 2.30E-01 | 3.53E-01 |
| DENND2D    | 0.0335  | 5.20E-01 | 6.44E-01 |
| DENND3     | 0.0463  | 3.74E-01 | 5.07E-01 |
| DENND4A    | -0.1257 | 1.54E-02 | 4.15E-02 |
| DENND4B    | 0.5442  | 5.51E-30 | 4.86E-27 |
| DENND4C    | 0.0110  | 8.33E-01 | 8.91E-01 |
| DENND5A    | 0.0645  | 2.15E-01 | 3.35E-01 |
| DENND5B    | -0.1168 | 2.44E-02 | 6.04E-02 |
| DENR       | 0.2014  | 9.39E-05 | 5.78E-04 |
| DEPDC1B    | 0.3307  | 6.45E-11 | 1.97E-09 |
| DEPDC1     | 0.3691  | 2.05E-13 | 1.03E-11 |
| DEPDC4     | 0.1132  | 2.93E-02 | 7.02E-02 |
| DEPDC5     | -0.0108 | 8.35E-01 | 8.92E-01 |
| DEPDC6     | -0.1090 | 3.59E-02 | 8.26E-02 |
| DEPDC7     | -0.2264 | 1.07E-05 | 8.94E-05 |
| DERA       | -0.2428 | 2.21E-06 | 2.28E-05 |
| DERL1      | -0.1525 | 3.23E-03 | 1.15E-02 |
| DERL2      | -0.0901 | 8.32E-02 | 1.61E-01 |
| DERL3      | -0.0065 | 9.01E-01 | 9.37E-01 |
| DES        | -0.1186 | 2.24E-02 | 5.62E-02 |
| DET1       | -0.0780 | 1.34E-01 | 2.32E-01 |
| DEXI       | -0.2077 | 5.53E-05 | 3.69E-04 |
| DFFA       | -0.0456 | 3.81E-01 | 5.15E-01 |

|         |         |          |          |
|---------|---------|----------|----------|
| DFFB    | 0.2039  | 7.65E-05 | 4.86E-04 |
| DFNA5   | 0.0231  | 6.57E-01 | 7.59E-01 |
| DFNB31  | 0.2956  | 6.42E-09 | 1.25E-07 |
| DFNB59  | 0.0455  | 3.82E-01 | 5.15E-01 |
| DGAT1   | -0.0371 | 4.76E-01 | 6.05E-01 |
| DGAT2L6 | 0.0881  | 9.03E-02 | 1.71E-01 |
| DGAT2   | 0.0399  | 4.43E-01 | 5.75E-01 |
| DGCR10  | 0.0089  | 8.64E-01 | 9.12E-01 |
| DGCR11  | 0.1705  | 9.76E-04 | 4.22E-03 |
| DGCR14  | 0.2613  | 3.30E-07 | 4.24E-06 |
| DGCR2   | 0.0514  | 3.24E-01 | 4.54E-01 |
| DGCR5   | -0.1335 | 1.00E-02 | 2.93E-02 |
| DGCR6L  | -0.1650 | 1.43E-03 | 5.79E-03 |
| DGCR6   | -0.1808 | 4.66E-04 | 2.24E-03 |
| DGCR8   | 0.2468  | 1.49E-06 | 1.61E-05 |
| DGCR9   | 0.0655  | 2.08E-01 | 3.26E-01 |
| DGKA    | -0.0051 | 9.23E-01 | 9.51E-01 |
| DGKB    | 0.0159  | 7.60E-01 | 8.38E-01 |
| DGKD    | 0.1631  | 1.62E-03 | 6.46E-03 |
| DGKE    | 0.0933  | 7.26E-02 | 1.44E-01 |
| DGKG    | 0.0685  | 1.88E-01 | 3.01E-01 |
| DGKH    | 0.0374  | 4.73E-01 | 6.02E-01 |
| DGKI    | -0.0774 | 1.37E-01 | 2.36E-01 |
| DGKK    | -0.0565 | 2.78E-01 | 4.06E-01 |
| DGKQ    | 0.0425  | 4.15E-01 | 5.47E-01 |
| DGKZ    | 0.1523  | 3.28E-03 | 1.16E-02 |
| DGUOK   | 0.0818  | 1.16E-01 | 2.08E-01 |
| DHCR24  | -0.0758 | 1.45E-01 | 2.47E-01 |
| DHCR7   | -0.1449 | 5.18E-03 | 1.70E-02 |
| DHDDS   | -0.2026 | 8.48E-05 | 5.30E-04 |
| DHDH    | 0.2472  | 1.44E-06 | 1.56E-05 |
| DHDPSL  | -0.2121 | 3.82E-05 | 2.70E-04 |
| DHFRL1  | -0.2003 | 1.03E-04 | 6.22E-04 |
| DHFR    | 0.1050  | 4.32E-02 | 9.58E-02 |
| DHH     | -0.1867 | 2.98E-04 | 1.55E-03 |
| DHODH   | -0.3525 | 2.70E-12 | 1.10E-10 |
| DHPS    | 0.0247  | 6.35E-01 | 7.42E-01 |
| DHRS11  | 0.0860  | 9.80E-02 | 1.83E-01 |
| DHRS12  | -0.3307 | 6.41E-11 | 1.97E-09 |
| DHRS13  | 0.1681  | 1.15E-03 | 4.86E-03 |
| DHRS1   | -0.2511 | 9.65E-07 | 1.10E-05 |
| DHRS2   | -0.1377 | 7.89E-03 | 2.40E-02 |
| DHRS3   | -0.2393 | 3.13E-06 | 3.08E-05 |
| DHRS4L1 | -0.1474 | 4.45E-03 | 1.50E-02 |

|         |         |          |          |
|---------|---------|----------|----------|
| DHRS4L2 | -0.1615 | 1.80E-03 | 7.06E-03 |
| DHRS4   | -0.2045 | 7.26E-05 | 4.65E-04 |
| DHRS7B  | -0.1221 | 1.86E-02 | 4.85E-02 |
| DHRS7C  | -0.0028 | 9.56E-01 | 9.73E-01 |
| DHRS7   | -0.0014 | 9.78E-01 | 9.86E-01 |
| DHRS9   | -0.1060 | 4.12E-02 | 9.23E-02 |
| DHRSX   | -0.1328 | 1.04E-02 | 3.02E-02 |
| DHTKD1  | -0.2456 | 1.69E-06 | 1.80E-05 |
| DHX15   | 0.1860  | 3.16E-04 | 1.63E-03 |
| DHX16   | 0.1926  | 1.90E-04 | 1.05E-03 |
| DHX29   | -0.0912 | 7.92E-02 | 1.55E-01 |
| DHX30   | 0.1330  | 1.04E-02 | 3.00E-02 |
| DHX32   | -0.0237 | 6.49E-01 | 7.53E-01 |
| DHX33   | -0.0659 | 2.05E-01 | 3.23E-01 |
| DHX34   | 0.4349  | 1.50E-18 | 2.55E-16 |
| DHX35   | 0.1393  | 7.21E-03 | 2.23E-02 |
| DHX36   | -0.0289 | 5.79E-01 | 6.96E-01 |
| DHX37   | 0.1319  | 1.10E-02 | 3.16E-02 |
| DHX38   | -0.0881 | 9.00E-02 | 1.71E-01 |
| DHX40P1 | 0.0949  | 6.78E-02 | 1.37E-01 |
| DHX40   | 0.0855  | 1.00E-01 | 1.86E-01 |
| DHX57   | 0.2599  | 3.83E-07 | 4.84E-06 |
| DHX58   | -0.1544 | 2.86E-03 | 1.04E-02 |
| DHX8    | 0.1846  | 3.52E-04 | 1.78E-03 |
| DHX9    | 0.3157  | 4.98E-10 | 1.26E-08 |
| DIABLO  | -0.0022 | 9.66E-01 | 9.79E-01 |
| DIAPH1  | -0.1830 | 3.96E-04 | 1.97E-03 |
| DIAPH2  | 0.1469  | 4.57E-03 | 1.53E-02 |
| DIAPH3  | 0.2687  | 1.48E-07 | 2.07E-06 |
| DICER1  | -0.0238 | 6.47E-01 | 7.52E-01 |
| DIDO1   | 0.2485  | 1.25E-06 | 1.38E-05 |
| DIMT1L  | 0.0323  | 5.36E-01 | 6.58E-01 |
| DIO1    | -0.1720 | 8.81E-04 | 3.86E-03 |
| DIO2    | -0.0559 | 2.83E-01 | 4.11E-01 |
| DIO3OS  | 0.0717  | 1.68E-01 | 2.77E-01 |
| DIO3    | -0.0097 | 8.52E-01 | 9.04E-01 |
| DIP2A   | 0.1144  | 2.76E-02 | 6.67E-02 |
| DIP2B   | 0.0934  | 7.23E-02 | 1.44E-01 |
| DIP2C   | -0.1091 | 3.56E-02 | 8.21E-02 |
| DIRAS1  | 0.2019  | 9.00E-05 | 5.58E-04 |
| DIRAS2  | 0.1355  | 8.98E-03 | 2.68E-02 |
| DIRAS3  | -0.1829 | 4.00E-04 | 1.98E-03 |
| DIRC1   | 0.0220  | 6.72E-01 | 7.72E-01 |
| DIRC2   | 0.0137  | 7.93E-01 | 8.63E-01 |

|               |         |          |          |
|---------------|---------|----------|----------|
| DIRC3         | -0.0416 | 4.24E-01 | 5.57E-01 |
| DIS3L2        | 0.0131  | 8.01E-01 | 8.69E-01 |
| DIS3L         | -0.0516 | 3.22E-01 | 4.52E-01 |
| DIS3          | -0.0089 | 8.64E-01 | 9.12E-01 |
| DISC1         | -0.0901 | 8.30E-02 | 1.60E-01 |
| DISC2         | 0.0267  | 6.08E-01 | 7.20E-01 |
| DISP1         | -0.0307 | 5.56E-01 | 6.75E-01 |
| DISP2         | -0.0254 | 6.26E-01 | 7.34E-01 |
| DIXDC1        | -0.1939 | 1.71E-04 | 9.63E-04 |
| DKC1          | 0.3070  | 1.55E-09 | 3.54E-08 |
| DKFZP434K028  | 0.0029  | 9.55E-01 | 9.72E-01 |
| DKFZP434L187  | 0.1651  | 1.42E-03 | 5.75E-03 |
| DKFZP586I1420 | -0.0215 | 6.80E-01 | 7.78E-01 |
| DKFZP686I1521 | 0.1979  | 1.25E-04 | 7.36E-04 |
| DKFZp434J0226 | 0.1321  | 1.09E-02 | 3.13E-02 |
| DKFZp434L192  | 0.0759  | 1.45E-01 | 2.47E-01 |
| DKFZp566F0947 | 0.0074  | 8.87E-01 | 9.28E-01 |
| DKFZp686A1627 | 0.0808  | 1.20E-01 | 2.15E-01 |
| DKFZp686O241  | -0.0522 | 3.16E-01 | 4.46E-01 |
| DKFZp761E198  | -0.1110 | 3.26E-02 | 7.65E-02 |
| DKFZp779M065  | -0.2294 | 8.06E-06 | 6.94E-05 |
| DKK1          | 0.1101  | 3.40E-02 | 7.91E-02 |
| DKK2          | -0.1060 | 4.13E-02 | 9.24E-02 |
| DKK3          | -0.1375 | 8.01E-03 | 2.43E-02 |
| DKK4          | -0.0142 | 7.85E-01 | 8.57E-01 |
| DKKL1         | 0.1645  | 1.48E-03 | 5.97E-03 |
| DLAT          | -0.0582 | 2.64E-01 | 3.91E-01 |
| DLC1          | -0.2408 | 2.70E-06 | 2.71E-05 |
| DLD           | -0.2543 | 6.95E-07 | 8.18E-06 |
| DLEC1         | 0.0855  | 1.00E-01 | 1.86E-01 |
| DLEU1         | 0.0496  | 3.41E-01 | 4.72E-01 |
| DLEU2L        | 0.2707  | 1.18E-07 | 1.69E-06 |
| DLEU2         | 0.2666  | 1.86E-07 | 2.54E-06 |
| DLEU7         | 0.0748  | 1.50E-01 | 2.54E-01 |
| DLG1          | 0.0350  | 5.02E-01 | 6.28E-01 |
| DLG2          | -0.2727 | 9.45E-08 | 1.38E-06 |
| DLG3          | 0.1390  | 7.33E-03 | 2.26E-02 |
| DLG4          | -0.0344 | 5.09E-01 | 6.33E-01 |
| DLG5          | 0.2088  | 5.04E-05 | 3.41E-04 |
| DLGAP1        | 0.0624  | 2.31E-01 | 3.53E-01 |
| DLGAP2        | -0.0750 | 1.49E-01 | 2.53E-01 |
| DLGAP3        | 0.0112  | 8.30E-01 | 8.89E-01 |
| DLGAP4        | 0.2113  | 4.09E-05 | 2.85E-04 |
| DLGAP5        | 0.3992  | 1.26E-15 | 9.90E-14 |



|         |         |          |          |
|---------|---------|----------|----------|
| DLK1    | 0.0265  | 6.10E-01 | 7.22E-01 |
| DLK2    | 0.1956  | 1.50E-04 | 8.65E-04 |
| DLL1    | -0.1671 | 1.24E-03 | 5.15E-03 |
| DLL3    | 0.1565  | 2.50E-03 | 9.28E-03 |
| DLL4    | -0.0515 | 3.23E-01 | 4.53E-01 |
| DLST    | -0.2447 | 1.83E-06 | 1.94E-05 |
| DLX1    | 0.0888  | 8.75E-02 | 1.67E-01 |
| DLX2    | 0.0756  | 1.46E-01 | 2.49E-01 |
| DLX3    | 0.1403  | 6.81E-03 | 2.13E-02 |
| DLX4    | 0.2337  | 5.39E-06 | 4.94E-05 |
| DLX5    | 0.2033  | 8.04E-05 | 5.06E-04 |
| DLX6AS  | 0.2930  | 8.88E-09 | 1.67E-07 |
| DLX6    | 0.2878  | 1.65E-08 | 2.92E-07 |
| DMAP1   | 0.1175  | 2.37E-02 | 5.89E-02 |
| DMBT1   | 0.2332  | 5.66E-06 | 5.14E-05 |
| DMBX1   | 0.2733  | 8.86E-08 | 1.30E-06 |
| DMC1    | 0.3141  | 6.12E-10 | 1.52E-08 |
| DMD     | -0.1318 | 1.10E-02 | 3.16E-02 |
| DMGDH   | -0.2303 | 7.45E-06 | 6.50E-05 |
| DMKN    | 0.1133  | 2.92E-02 | 6.99E-02 |
| DMP1    | 0.1013  | 5.13E-02 | 1.10E-01 |
| DMPK    | 0.1939  | 1.71E-04 | 9.65E-04 |
| DMRT1   | 0.1573  | 2.37E-03 | 8.87E-03 |
| DMRT2   | 0.2298  | 7.78E-06 | 6.73E-05 |
| DMRT3   | 0.0323  | 5.35E-01 | 6.57E-01 |
| DMRTA1  | -0.0640 | 2.19E-01 | 3.39E-01 |
| DMRTA2  | 0.1784  | 5.54E-04 | 2.59E-03 |
| DMRTB1  | -0.0254 | 6.26E-01 | 7.34E-01 |
| DMRTC1B | 0.0755  | 1.47E-01 | 2.49E-01 |
| DMRTC1  | 0.1064  | 4.06E-02 | 9.13E-02 |
| DMRTC2  | 0.1276  | 1.39E-02 | 3.83E-02 |
| DMTF1   | 0.2309  | 7.01E-06 | 6.18E-05 |
| DMWD    | 0.1126  | 3.02E-02 | 7.18E-02 |
| DMXL1   | -0.0431 | 4.08E-01 | 5.41E-01 |
| DMXL2   | 0.0740  | 1.55E-01 | 2.60E-01 |
| DNA2    | 0.4204  | 2.57E-17 | 3.03E-15 |
| DNAH10  | 0.1806  | 4.72E-04 | 2.26E-03 |
| DNAH11  | 0.0659  | 2.06E-01 | 3.23E-01 |
| DNAH12  | 0.0191  | 7.14E-01 | 8.05E-01 |
| DNAH14  | 0.3578  | 1.19E-12 | 5.24E-11 |
| DNAH17  | 0.2563  | 5.62E-07 | 6.76E-06 |
| DNAH1   | 0.0862  | 9.74E-02 | 1.82E-01 |
| DNAH2   | -0.0456 | 3.82E-01 | 5.15E-01 |
| DNAH3   | 0.1312  | 1.14E-02 | 3.26E-02 |

|             |         |          |          |
|-------------|---------|----------|----------|
| DNAH5       | -0.0326 | 5.31E-01 | 6.53E-01 |
| DNAH6       | -0.0805 | 1.22E-01 | 2.17E-01 |
| DNAH7       | 0.0856  | 9.95E-02 | 1.85E-01 |
| DNAH8       | 0.1062  | 4.10E-02 | 9.20E-02 |
| DNAH9       | -0.1021 | 4.95E-02 | 1.07E-01 |
| DNAI1       | 0.0789  | 1.29E-01 | 2.26E-01 |
| DNAI2       | 0.0476  | 3.61E-01 | 4.93E-01 |
| DNAJA1      | 0.0822  | 1.14E-01 | 2.06E-01 |
| DNAJA2      | -0.1949 | 1.58E-04 | 9.03E-04 |
| DNAJA3      | -0.1443 | 5.35E-03 | 1.75E-02 |
| DNAJA4      | 0.0974  | 6.10E-02 | 1.26E-01 |
| DNAJB11     | 0.1664  | 1.30E-03 | 5.36E-03 |
| DNAJB12     | -0.1060 | 4.13E-02 | 9.25E-02 |
| DNAJB13     | 0.1019  | 5.00E-02 | 1.08E-01 |
| DNAJB14     | -0.1473 | 4.45E-03 | 1.50E-02 |
| DNAJB1      | 0.0036  | 9.45E-01 | 9.66E-01 |
| DNAJB2      | -0.0041 | 9.38E-01 | 9.61E-01 |
| DNAJB3      | 0.0633  | 2.24E-01 | 3.45E-01 |
| DNAJB4      | -0.0059 | 9.10E-01 | 9.43E-01 |
| DNAJB5      | -0.0695 | 1.82E-01 | 2.94E-01 |
| DNAJB6      | -0.0741 | 1.54E-01 | 2.59E-01 |
| DNAJB7      | 0.0950  | 6.75E-02 | 1.36E-01 |
| DNAJB8      | -0.0233 | 6.55E-01 | 7.57E-01 |
| DNAJB9      | -0.2664 | 1.91E-07 | 2.61E-06 |
| DNAJC10     | 0.1333  | 1.02E-02 | 2.97E-02 |
| DNAJC11     | -0.0231 | 6.57E-01 | 7.59E-01 |
| DNAJC12     | -0.0726 | 1.63E-01 | 2.70E-01 |
| DNAJC13     | -0.0011 | 9.84E-01 | 9.90E-01 |
| DNAJC14     | 0.0808  | 1.20E-01 | 2.15E-01 |
| DNAJC15     | -0.0149 | 7.75E-01 | 8.50E-01 |
| DNAJC16     | -0.1893 | 2.45E-04 | 1.31E-03 |
| DNAJC17     | -0.0536 | 3.03E-01 | 4.33E-01 |
| DNAJC18     | 0.0436  | 4.02E-01 | 5.35E-01 |
| DNAJC19     | -0.1651 | 1.42E-03 | 5.77E-03 |
| DNAJC1      | 0.0109  | 8.34E-01 | 8.91E-01 |
| DNAJC21     | 0.1483  | 4.19E-03 | 1.43E-02 |
| DNAJC22     | -0.0797 | 1.26E-01 | 2.22E-01 |
| DNAJC24     | -0.0492 | 3.44E-01 | 4.76E-01 |
| DNAJC25-GNG | -0.0235 | 6.52E-01 | 7.56E-01 |
| DNAJC25     | -0.2046 | 7.20E-05 | 4.62E-04 |
| DNAJC27     | -0.0789 | 1.29E-01 | 2.26E-01 |
| DNAJC28     | -0.1471 | 4.53E-03 | 1.52E-02 |
| DNAJC2      | 0.1322  | 1.08E-02 | 3.11E-02 |
| DNAJC30     | -0.3243 | 1.56E-10 | 4.44E-09 |

|          |         |          |          |
|----------|---------|----------|----------|
| DNAJC3   | -0.0720 | 1.66E-01 | 2.74E-01 |
| DNAJC4   | -0.0049 | 9.25E-01 | 9.53E-01 |
| DNAJC5B  | -0.0372 | 4.75E-01 | 6.04E-01 |
| DNAJC5G  | 0.0451  | 3.87E-01 | 5.19E-01 |
| DNAJC5   | 0.1429  | 5.83E-03 | 1.87E-02 |
| DNAJC6   | 0.0670  | 1.98E-01 | 3.14E-01 |
| DNAJC7   | 0.1847  | 3.48E-04 | 1.77E-03 |
| DNAJC8   | 0.1254  | 1.57E-02 | 4.21E-02 |
| DNAJC9   | 0.3230  | 1.86E-10 | 5.20E-09 |
| DNAL1    | -0.0033 | 9.50E-01 | 9.69E-01 |
| DNAL4    | 0.1946  | 1.62E-04 | 9.21E-04 |
| DNAL11   | -0.0657 | 2.07E-01 | 3.25E-01 |
| DNASE1L1 | -0.0054 | 9.17E-01 | 9.48E-01 |
| DNASE1L2 | 0.0669  | 1.99E-01 | 3.15E-01 |
| DNASE1L3 | -0.3158 | 4.88E-10 | 1.24E-08 |
| DNASE1   | 0.2708  | 1.17E-07 | 1.68E-06 |
| DNASE2B  | -0.1280 | 1.36E-02 | 3.77E-02 |
| DNASE2   | -0.0389 | 4.55E-01 | 5.86E-01 |
| DND1     | -0.0083 | 8.73E-01 | 9.18E-01 |
| DNER     | -0.0696 | 1.81E-01 | 2.93E-01 |
| DNHD1    | 0.0703  | 1.77E-01 | 2.88E-01 |
| DNLZ     | 0.1146  | 2.74E-02 | 6.63E-02 |
| DNM1L    | 0.2156  | 2.82E-05 | 2.08E-04 |
| DNM1P35  | 0.1771  | 6.12E-04 | 2.82E-03 |
| DNM1     | 0.1493  | 3.94E-03 | 1.36E-02 |
| DNM2     | -0.0335 | 5.20E-01 | 6.44E-01 |
| DNM3     | -0.0449 | 3.88E-01 | 5.21E-01 |
| DNMBP    | -0.1545 | 2.84E-03 | 1.03E-02 |
| DNMT1    | 0.3237  | 1.69E-10 | 4.77E-09 |
| DNMT3A   | 0.2508  | 9.91E-07 | 1.12E-05 |
| DNMT3B   | 0.3471  | 6.09E-12 | 2.31E-10 |
| DNMT3L   | -0.2018 | 9.07E-05 | 5.61E-04 |
| DNPEP    | -0.0382 | 4.64E-01 | 5.94E-01 |
| DNTTIP1  | 0.1556  | 2.65E-03 | 9.75E-03 |
| DNTTIP2  | 0.2432  | 2.14E-06 | 2.22E-05 |
| DNTT     | 0.0687  | 1.87E-01 | 3.00E-01 |
| DOC2A    | 0.0856  | 9.96E-02 | 1.85E-01 |
| DOC2B    | 0.0118  | 8.20E-01 | 8.82E-01 |
| DOCK10   | -0.0264 | 6.13E-01 | 7.23E-01 |
| DOCK11   | -0.0628 | 2.28E-01 | 3.50E-01 |
| DOCK1    | -0.0381 | 4.64E-01 | 5.94E-01 |
| DOCK2    | -0.0804 | 1.22E-01 | 2.17E-01 |
| DOCK3    | 0.2210  | 1.74E-05 | 1.36E-04 |
| DOCK4    | -0.1698 | 1.03E-03 | 4.39E-03 |

|        |         |          |          |
|--------|---------|----------|----------|
| DOCK5  | -0.0256 | 6.24E-01 | 7.32E-01 |
| DOCK6  | -0.0531 | 3.08E-01 | 4.37E-01 |
| DOCK7  | 0.0695  | 1.82E-01 | 2.94E-01 |
| DOCK8  | -0.0489 | 3.48E-01 | 4.80E-01 |
| DOCK9  | -0.0817 | 1.16E-01 | 2.09E-01 |
| DOHH   | 0.0305  | 5.58E-01 | 6.77E-01 |
| DOK1   | 0.1119  | 3.12E-02 | 7.37E-02 |
| DOK2   | -0.0559 | 2.82E-01 | 4.11E-01 |
| DOK3   | 0.0279  | 5.92E-01 | 7.06E-01 |
| DOK4   | -0.2435 | 2.08E-06 | 2.16E-05 |
| DOK5   | -0.1448 | 5.21E-03 | 1.71E-02 |
| DOK6   | 0.0229  | 6.61E-01 | 7.62E-01 |
| DOK7   | -0.0029 | 9.56E-01 | 9.73E-01 |
| DOLK   | 0.1619  | 1.76E-03 | 6.90E-03 |
| DOLPP1 | 0.0578  | 2.67E-01 | 3.94E-01 |
| DOM3Z  | 0.2229  | 1.46E-05 | 1.17E-04 |
| DONSON | 0.3830  | 2.07E-14 | 1.26E-12 |
| DOPEY1 | 0.1733  | 8.03E-04 | 3.56E-03 |
| DOPEY2 | 0.1388  | 7.43E-03 | 2.29E-02 |
| DOT1L  | 0.2961  | 6.04E-09 | 1.18E-07 |
| DPAGT1 | 0.0630  | 2.26E-01 | 3.47E-01 |
| DPCD   | -0.0176 | 7.35E-01 | 8.21E-01 |
| DPCR1  | -0.0624 | 2.30E-01 | 3.53E-01 |
| DPEP1  | -0.0112 | 8.30E-01 | 8.89E-01 |
| DPEP2  | -0.1256 | 1.55E-02 | 4.17E-02 |
| DPEP3  | 0.0056  | 9.15E-01 | 9.47E-01 |
| DPF1   | 0.1191  | 2.17E-02 | 5.50E-02 |
| DPF2   | 0.2569  | 5.30E-07 | 6.43E-06 |
| DPF3   | -0.2850 | 2.30E-08 | 3.90E-07 |
| DPH1   | -0.0923 | 7.59E-02 | 1.50E-01 |
| DPH2   | 0.1606  | 1.92E-03 | 7.43E-03 |
| DPH3B  | 0.1074  | 3.86E-02 | 8.77E-02 |
| DPH3   | -0.0057 | 9.13E-01 | 9.45E-01 |
| DPH5   | 0.0500  | 3.37E-01 | 4.68E-01 |
| DPM1   | 0.0518  | 3.20E-01 | 4.50E-01 |
| DPM2   | 0.1761  | 6.58E-04 | 3.00E-03 |
| DPM3   | 0.1295  | 1.25E-02 | 3.51E-02 |
| DPP10  | 0.0260  | 6.17E-01 | 7.27E-01 |
| DPP3   | -0.0400 | 4.42E-01 | 5.74E-01 |
| DPP4   | -0.0688 | 1.86E-01 | 2.99E-01 |
| DPP6   | 0.0335  | 5.20E-01 | 6.44E-01 |
| DPP7   | -0.0360 | 4.89E-01 | 6.16E-01 |
| DPP8   | -0.0665 | 2.01E-01 | 3.18E-01 |
| DPP9   | -0.0330 | 5.26E-01 | 6.49E-01 |

|           |         |          |          |
|-----------|---------|----------|----------|
| DPPA2     | 0.0768  | 1.40E-01 | 2.40E-01 |
| DPPA3     | 0.0933  | 7.25E-02 | 1.44E-01 |
| DPPA4     | -0.0257 | 6.22E-01 | 7.31E-01 |
| DPPA5     | 0.0628  | 2.27E-01 | 3.49E-01 |
| DPRXP4    | 0.0981  | 5.90E-02 | 1.22E-01 |
| DPRX      | -0.0203 | 6.96E-01 | 7.91E-01 |
| DPT       | -0.1213 | 1.94E-02 | 5.01E-02 |
| DPY19L1   | -0.0491 | 3.45E-01 | 4.77E-01 |
| DPY19L2P1 | 0.0877  | 9.16E-02 | 1.74E-01 |
| DPY19L2P2 | 0.1682  | 1.14E-03 | 4.82E-03 |
| DPY19L2P4 | 0.0455  | 3.82E-01 | 5.15E-01 |
| DPY19L2   | 0.0241  | 6.43E-01 | 7.49E-01 |
| DPY19L3   | -0.0043 | 9.34E-01 | 9.59E-01 |
| DPY19L4   | -0.0286 | 5.83E-01 | 6.99E-01 |
| DPY30     | 0.1295  | 1.26E-02 | 3.52E-02 |
| DPYD      | -0.0828 | 1.11E-01 | 2.03E-01 |
| DPYSL2    | -0.2050 | 6.95E-05 | 4.48E-04 |
| DPYSL3    | -0.0213 | 6.83E-01 | 7.80E-01 |
| DPYSL4    | 0.0773  | 1.37E-01 | 2.37E-01 |
| DPYSL5    | 0.0800  | 1.24E-01 | 2.20E-01 |
| DPYS      | -0.1954 | 1.52E-04 | 8.75E-04 |
| DQX1      | 0.2816  | 3.43E-08 | 5.56E-07 |
| DR1       | 0.2006  | 1.00E-04 | 6.09E-04 |
| DRAM1     | 0.1007  | 5.25E-02 | 1.12E-01 |
| DRAM2     | 0.0237  | 6.49E-01 | 7.53E-01 |
| DRAP1     | 0.0786  | 1.31E-01 | 2.29E-01 |
| DRD1      | -0.1035 | 4.64E-02 | 1.01E-01 |
| DRD2      | 0.0249  | 6.33E-01 | 7.40E-01 |
| DRD3      | -0.0284 | 5.86E-01 | 7.01E-01 |
| DRD4      | 0.0998  | 5.47E-02 | 1.15E-01 |
| DRD5      | -0.0614 | 2.38E-01 | 3.62E-01 |
| DRG1      | 0.1997  | 1.08E-04 | 6.49E-04 |
| DRG2      | 0.0108  | 8.35E-01 | 8.92E-01 |
| DRGX      | -0.0232 | 6.56E-01 | 7.58E-01 |
| DRP2      | 0.3292  | 7.92E-11 | 2.37E-09 |
| DSC1      | -0.0417 | 4.23E-01 | 5.55E-01 |
| DSC2      | 0.0841  | 1.06E-01 | 1.94E-01 |
| DSC3      | 0.0710  | 1.73E-01 | 2.82E-01 |
| DSCAML1   | 0.0213  | 6.83E-01 | 7.80E-01 |
| DSCAM     | -0.0548 | 2.93E-01 | 4.22E-01 |
| DSCC1     | 0.3055  | 1.86E-09 | 4.18E-08 |
| DSCR10    | 0.1509  | 3.59E-03 | 1.25E-02 |
| DSCR3     | -0.2226 | 1.51E-05 | 1.20E-04 |
| DSCR4     | 0.0955  | 6.63E-02 | 1.34E-01 |

|         |         |          |          |
|---------|---------|----------|----------|
| DSCR6   | 0.2914  | 1.07E-08 | 1.98E-07 |
| DSCR8   | 0.0603  | 2.47E-01 | 3.71E-01 |
| DSCR9   | 0.2417  | 2.49E-06 | 2.52E-05 |
| DSEL    | -0.0284 | 5.86E-01 | 7.01E-01 |
| DSE     | -0.0824 | 1.13E-01 | 2.05E-01 |
| DSG1    | -0.2744 | 7.81E-08 | 1.16E-06 |
| DSG2    | 0.1886  | 2.58E-04 | 1.37E-03 |
| DSG3    | -0.0206 | 6.92E-01 | 7.87E-01 |
| DSG4    | -0.0688 | 1.86E-01 | 2.99E-01 |
| DSN1    | 0.4308  | 3.39E-18 | 5.08E-16 |
| DSPP    | 0.0489  | 3.47E-01 | 4.80E-01 |
| DSP     | -0.0265 | 6.11E-01 | 7.22E-01 |
| DSTN    | -0.0636 | 2.22E-01 | 3.43E-01 |
| DSTYK   | 0.2918  | 1.02E-08 | 1.90E-07 |
| DST     | -0.0634 | 2.23E-01 | 3.44E-01 |
| DTD1    | 0.1015  | 5.07E-02 | 1.09E-01 |
| DTHD1   | -0.0721 | 1.66E-01 | 2.73E-01 |
| DTL     | 0.4892  | 1.01E-23 | 4.39E-21 |
| DTNA    | -0.1083 | 3.70E-02 | 8.48E-02 |
| DTNBP1  | 0.2664  | 1.91E-07 | 2.61E-06 |
| DTNB    | 0.1573  | 2.37E-03 | 8.87E-03 |
| DTWD1   | -0.0405 | 4.36E-01 | 5.68E-01 |
| DTWD2   | -0.2120 | 3.83E-05 | 2.70E-04 |
| DTX1    | -0.0934 | 7.24E-02 | 1.44E-01 |
| DTX2    | 0.1077  | 3.82E-02 | 8.69E-02 |
| DTX3L   | -0.0064 | 9.02E-01 | 9.38E-01 |
| DTX3    | 0.1827  | 4.04E-04 | 2.00E-03 |
| DTX4    | 0.0419  | 4.22E-01 | 5.54E-01 |
| DTYMK   | 0.2781  | 5.14E-08 | 7.99E-07 |
| DULLARD | 0.1061  | 4.12E-02 | 9.23E-02 |
| DUOX1   | 0.2455  | 1.70E-06 | 1.81E-05 |
| DUOX2   | 0.1346  | 9.44E-03 | 2.79E-02 |
| DUOXA1  | 0.1356  | 8.94E-03 | 2.67E-02 |
| DUOXA2  | 0.1705  | 9.78E-04 | 4.22E-03 |
| DUPD1   | -0.0208 | 6.89E-01 | 7.85E-01 |
| DUS1L   | 0.0419  | 4.21E-01 | 5.54E-01 |
| DUS2L   | -0.1066 | 4.01E-02 | 9.03E-02 |
| DUS3L   | 0.0201  | 7.00E-01 | 7.93E-01 |
| DUS4L   | 0.0411  | 4.30E-01 | 5.63E-01 |
| DUSP10  | -0.0712 | 1.71E-01 | 2.81E-01 |
| DUSP11  | 0.0771  | 1.38E-01 | 2.38E-01 |
| DUSP12  | 0.5441  | 5.61E-30 | 4.86E-27 |
| DUSP13  | 0.0720  | 1.67E-01 | 2.75E-01 |
| DUSP14  | -0.0441 | 3.97E-01 | 5.30E-01 |

|          |         |          |          |
|----------|---------|----------|----------|
| DUSP15   | 0.1024  | 4.88E-02 | 1.06E-01 |
| DUSP16   | -0.2132 | 3.48E-05 | 2.49E-04 |
| DUSP18   | 0.1455  | 4.99E-03 | 1.64E-02 |
| DUSP19   | -0.1440 | 5.46E-03 | 1.77E-02 |
| DUSP1    | -0.1545 | 2.85E-03 | 1.04E-02 |
| DUSP21   | 0.0467  | 3.70E-01 | 5.03E-01 |
| DUSP22   | 0.0752  | 1.48E-01 | 2.52E-01 |
| DUSP23   | 0.1055  | 4.22E-02 | 9.40E-02 |
| DUSP26   | 0.0893  | 8.60E-02 | 1.65E-01 |
| DUSP27   | -0.0569 | 2.75E-01 | 4.03E-01 |
| DUSP28   | 0.2382  | 3.48E-06 | 3.39E-05 |
| DUSP2    | 0.0050  | 9.24E-01 | 9.52E-01 |
| DUSP3    | 0.0276  | 5.96E-01 | 7.10E-01 |
| DUSP4    | 0.0131  | 8.02E-01 | 8.69E-01 |
| DUSP5P   | 0.2778  | 5.30E-08 | 8.19E-07 |
| DUSP5    | -0.0072 | 8.90E-01 | 9.30E-01 |
| DUSP6    | -0.1637 | 1.56E-03 | 6.25E-03 |
| DUSP7    | 0.0524  | 3.14E-01 | 4.44E-01 |
| DUSP8    | -0.0489 | 3.48E-01 | 4.80E-01 |
| DUSP9    | 0.3116  | 8.57E-10 | 2.06E-08 |
| DUT      | 0.0557  | 2.85E-01 | 4.14E-01 |
| DUXA     | 0.1002  | 5.37E-02 | 1.14E-01 |
| DVL1     | -0.0864 | 9.65E-02 | 1.81E-01 |
| DVL2     | 0.2823  | 3.16E-08 | 5.18E-07 |
| DVL3     | 0.2326  | 5.99E-06 | 5.41E-05 |
| DVWA     | 0.1139  | 2.83E-02 | 6.82E-02 |
| DYDC1    | 0.1134  | 2.90E-02 | 6.95E-02 |
| DYDC2    | -0.0415 | 4.26E-01 | 5.58E-01 |
| DYM      | 0.0574  | 2.70E-01 | 3.98E-01 |
| DYNC1H1  | 0.1035  | 4.64E-02 | 1.01E-01 |
| DYNC1I1  | -0.0106 | 8.39E-01 | 8.94E-01 |
| DYNC1I2  | 0.0495  | 3.41E-01 | 4.73E-01 |
| DYNC1LI1 | 0.1942  | 1.67E-04 | 9.45E-04 |
| DYNC1LI2 | -0.0834 | 1.09E-01 | 1.98E-01 |
| DYNC2H1  | 0.0077  | 8.82E-01 | 9.25E-01 |
| DYNC2LI1 | 0.1661  | 1.32E-03 | 5.43E-03 |
| DYNLL1   | 0.1017  | 5.02E-02 | 1.08E-01 |
| DYNLL2   | -0.0963 | 6.39E-02 | 1.31E-01 |
| DYNLRB1  | 0.1412  | 6.43E-03 | 2.03E-02 |
| DYNLRB2  | 0.0695  | 1.82E-01 | 2.94E-01 |
| DYNLT1   | 0.1755  | 6.87E-04 | 3.12E-03 |
| DYNLT3   | -0.1167 | 2.46E-02 | 6.07E-02 |
| DYRK1A   | 0.0872  | 9.35E-02 | 1.76E-01 |
| DYRK1B   | -0.0764 | 1.42E-01 | 2.43E-01 |

|          |         |          |          |
|----------|---------|----------|----------|
| DYRK2    | 0.2277  | 9.44E-06 | 7.99E-05 |
| DYRK3    | 0.0814  | 1.17E-01 | 2.11E-01 |
| DYRK4    | 0.1255  | 1.56E-02 | 4.19E-02 |
| DYSFIP1  | 0.0859  | 9.85E-02 | 1.84E-01 |
| DYSF     | -0.2941 | 7.74E-09 | 1.47E-07 |
| DYX1C1   | 0.2259  | 1.12E-05 | 9.26E-05 |
| DZIP1L   | 0.2859  | 2.08E-08 | 3.58E-07 |
| DZIP1    | 0.0226  | 6.65E-01 | 7.65E-01 |
| DZIP3    | -0.0401 | 4.41E-01 | 5.73E-01 |
| E2F1     | 0.3979  | 1.60E-15 | 1.22E-13 |
| E2F2     | 0.3956  | 2.37E-15 | 1.75E-13 |
| E2F3     | 0.2569  | 5.30E-07 | 6.44E-06 |
| E2F4     | 0.1558  | 2.61E-03 | 9.62E-03 |
| E2F5     | 0.0735  | 1.58E-01 | 2.64E-01 |
| E2F6     | 0.3060  | 1.75E-09 | 3.96E-08 |
| E2F7     | 0.3588  | 1.03E-12 | 4.60E-11 |
| E2F8     | 0.3630  | 5.33E-13 | 2.50E-11 |
| E4F1     | 0.1388  | 7.43E-03 | 2.29E-02 |
| EAF1     | -0.0644 | 2.16E-01 | 3.36E-01 |
| EAF2     | 0.2331  | 5.68E-06 | 5.16E-05 |
| EAPP     | -0.0589 | 2.58E-01 | 3.83E-01 |
| EARS2    | -0.2252 | 1.19E-05 | 9.79E-05 |
| EBAG9    | -0.1661 | 1.33E-03 | 5.44E-03 |
| EBF1     | -0.0623 | 2.31E-01 | 3.54E-01 |
| EBF2     | -0.1040 | 4.53E-02 | 9.96E-02 |
| EBF3     | -0.0802 | 1.23E-01 | 2.18E-01 |
| EBF4     | 0.0245  | 6.38E-01 | 7.44E-01 |
| EBI3     | -0.0568 | 2.75E-01 | 4.03E-01 |
| EBNA1BP2 | 0.1319  | 1.10E-02 | 3.16E-02 |
| EBPL     | -0.1273 | 1.42E-02 | 3.89E-02 |
| EBP      | -0.1165 | 2.48E-02 | 6.11E-02 |
| ECD      | 0.1758  | 6.73E-04 | 3.06E-03 |
| ECE1     | -0.1174 | 2.37E-02 | 5.89E-02 |
| ECE2     | -0.0093 | 8.58E-01 | 9.09E-01 |
| ECEL1    | -0.0106 | 8.39E-01 | 8.94E-01 |
| ECH1     | -0.1564 | 2.53E-03 | 9.35E-03 |
| ECHDC1   | -0.1294 | 1.26E-02 | 3.54E-02 |
| ECHDC2   | -0.1952 | 1.55E-04 | 8.86E-04 |
| ECHDC3   | -0.0887 | 8.79E-02 | 1.68E-01 |
| ECHS1    | -0.2631 | 2.73E-07 | 3.59E-06 |
| ECM1     | -0.0785 | 1.31E-01 | 2.29E-01 |
| ECM2     | -0.2883 | 1.57E-08 | 2.80E-07 |
| ECSCR    | -0.1481 | 4.25E-03 | 1.44E-02 |
| ECSIT    | -0.2284 | 8.87E-06 | 7.56E-05 |



|          |         |          |          |
|----------|---------|----------|----------|
| ECT2L    | 0.1393  | 7.20E-03 | 2.23E-02 |
| ECT2     | 0.3519  | 2.95E-12 | 1.19E-10 |
| EDA2R    | -0.1715 | 9.11E-04 | 3.97E-03 |
| EDARADD  | 0.1569  | 2.43E-03 | 9.06E-03 |
| EDAR     | -0.1810 | 4.59E-04 | 2.21E-03 |
| EDA      | 0.0399  | 4.44E-01 | 5.75E-01 |
| EDC3     | 0.2455  | 1.70E-06 | 1.81E-05 |
| EDC4     | 0.1013  | 5.13E-02 | 1.10E-01 |
| EDDM3A   | -0.0362 | 4.87E-01 | 6.15E-01 |
| EDDM3B   | 0.0445  | 3.93E-01 | 5.26E-01 |
| EDEM1    | -0.2297 | 7.84E-06 | 6.78E-05 |
| EDEM2    | 0.0352  | 4.99E-01 | 6.25E-01 |
| EDEM3    | 0.1783  | 5.58E-04 | 2.61E-03 |
| EDF1     | 0.0615  | 2.37E-01 | 3.61E-01 |
| EDIL3    | -0.1042 | 4.49E-02 | 9.89E-02 |
| EDN1     | -0.0533 | 3.06E-01 | 4.36E-01 |
| EDN2     | -0.0320 | 5.39E-01 | 6.60E-01 |
| EDN3     | 0.0014  | 9.78E-01 | 9.86E-01 |
| EDNRA    | -0.0356 | 4.94E-01 | 6.21E-01 |
| EDNRB    | -0.1551 | 2.74E-03 | 1.00E-02 |
| EEA1     | -0.0114 | 8.26E-01 | 8.86E-01 |
| EED      | 0.3780  | 4.75E-14 | 2.70E-12 |
| EEF1A1P9 | 0.0397  | 4.46E-01 | 5.78E-01 |
| EEF1A1   | 0.0652  | 2.10E-01 | 3.28E-01 |
| EEF1A2   | -0.0329 | 5.28E-01 | 6.51E-01 |
| EEF1B2   | 0.1077  | 3.81E-02 | 8.68E-02 |
| EEF1DP3  | 0.0805  | 1.22E-01 | 2.16E-01 |
| EEF1D    | 0.0218  | 6.76E-01 | 7.75E-01 |
| EEF1E1   | 0.1927  | 1.88E-04 | 1.05E-03 |
| EEF1G    | 0.1104  | 3.35E-02 | 7.83E-02 |
| EEF2K    | -0.0106 | 8.39E-01 | 8.94E-01 |
| EEF2     | -0.2286 | 8.67E-06 | 7.41E-05 |
| EEFSEC   | -0.0667 | 2.00E-01 | 3.16E-01 |
| EEP1D    | 0.0186  | 7.21E-01 | 8.10E-01 |
| EFCAB10  | 0.0780  | 1.34E-01 | 2.32E-01 |
| EFCAB1   | -0.0597 | 2.52E-01 | 3.77E-01 |
| EFCAB2   | 0.1096  | 3.49E-02 | 8.08E-02 |
| EFCAB3   | 0.0919  | 7.72E-02 | 1.52E-01 |
| EFCAB4A  | 0.1101  | 3.41E-02 | 7.93E-02 |
| EFCAB4B  | 0.0077  | 8.83E-01 | 9.25E-01 |
| EFCAB5   | 0.1017  | 5.04E-02 | 1.08E-01 |
| EFCAB6   | -0.1009 | 5.20E-02 | 1.11E-01 |
| EFCAB7   | 0.2388  | 3.29E-06 | 3.23E-05 |
| EFEMP1   | -0.0830 | 1.11E-01 | 2.01E-01 |

|         |         |          |          |
|---------|---------|----------|----------|
| EFEMP2  | -0.0807 | 1.21E-01 | 2.16E-01 |
| EFHA1   | -0.0518 | 3.20E-01 | 4.50E-01 |
| EFHA2   | -0.1426 | 5.95E-03 | 1.90E-02 |
| EFHB    | 0.0318  | 5.41E-01 | 6.62E-01 |
| EFHC1   | 0.2525  | 8.34E-07 | 9.66E-06 |
| EFHC2   | 0.1863  | 3.08E-04 | 1.60E-03 |
| EFHD1   | -0.1259 | 1.52E-02 | 4.11E-02 |
| EFHD2   | 0.0764  | 1.42E-01 | 2.43E-01 |
| EFNA1   | 0.2850  | 2.30E-08 | 3.90E-07 |
| EFNA2   | -0.0913 | 7.89E-02 | 1.54E-01 |
| EFNA3   | 0.3178  | 3.78E-10 | 9.94E-09 |
| EFNA4   | 0.4098  | 1.87E-16 | 1.79E-14 |
| EFNA5   | 0.0558  | 2.84E-01 | 4.12E-01 |
| EFNB1   | 0.1224  | 1.83E-02 | 4.78E-02 |
| EFNB2   | -0.1061 | 4.12E-02 | 9.23E-02 |
| EFNB3   | -0.1473 | 4.47E-03 | 1.51E-02 |
| EFR3A   | -0.1977 | 1.27E-04 | 7.46E-04 |
| EFR3B   | 0.1670  | 1.24E-03 | 5.17E-03 |
| EFS     | 0.0011  | 9.82E-01 | 9.89E-01 |
| EFTUD1  | 0.0709  | 1.73E-01 | 2.83E-01 |
| EFTUD2  | 0.3000  | 3.72E-09 | 7.70E-08 |
| EGFL6   | 0.0745  | 1.52E-01 | 2.56E-01 |
| EGFL7   | -0.0420 | 4.20E-01 | 5.53E-01 |
| EGFL8   | 0.0952  | 6.70E-02 | 1.36E-01 |
| EGFLAM  | -0.1060 | 4.13E-02 | 9.24E-02 |
| EGFR    | -0.1045 | 4.42E-02 | 9.76E-02 |
| EGF     | 0.1187  | 2.22E-02 | 5.59E-02 |
| EGLN1   | -0.0403 | 4.39E-01 | 5.70E-01 |
| EGLN2   | 0.0948  | 6.83E-02 | 1.38E-01 |
| EGLN3   | 0.2027  | 8.41E-05 | 5.28E-04 |
| EGOT    | -0.0289 | 5.79E-01 | 6.96E-01 |
| EGR1    | -0.1044 | 4.45E-02 | 9.81E-02 |
| EGR2    | -0.1011 | 5.18E-02 | 1.10E-01 |
| EGR3    | -0.1514 | 3.47E-03 | 1.22E-02 |
| EGR4    | -0.0092 | 8.60E-01 | 9.10E-01 |
| EHBP1L1 | 0.1475  | 4.40E-03 | 1.49E-02 |
| EHBP1   | -0.1610 | 1.86E-03 | 7.24E-03 |
| EHD1    | -0.0499 | 3.38E-01 | 4.69E-01 |
| EHD2    | -0.1268 | 1.45E-02 | 3.97E-02 |
| EHD3    | -0.0842 | 1.05E-01 | 1.93E-01 |
| EHD4    | -0.0918 | 7.74E-02 | 1.52E-01 |
| EHF     | 0.2001  | 1.05E-04 | 6.32E-04 |
| EHHADH  | -0.2888 | 1.48E-08 | 2.64E-07 |
| EHMT1   | 0.1060  | 4.13E-02 | 9.24E-02 |

|         |         |          |          |
|---------|---------|----------|----------|
| EHMT2   | 0.3506  | 3.62E-12 | 1.45E-10 |
| EI24    | -0.1780 | 5.74E-04 | 2.67E-03 |
| EID1    | -0.1262 | 1.50E-02 | 4.08E-02 |
| EID2B   | 0.2876  | 1.70E-08 | 2.99E-07 |
| EID2    | 0.0860  | 9.81E-02 | 1.83E-01 |
| EID3    | 0.0817  | 1.16E-01 | 2.09E-01 |
| EIF1AD  | 0.2476  | 1.38E-06 | 1.50E-05 |
| EIF1AX  | -0.0170 | 7.44E-01 | 8.27E-01 |
| EIF1AY  | -0.0130 | 8.02E-01 | 8.70E-01 |
| EIF1B   | 0.0271  | 6.03E-01 | 7.15E-01 |
| EIF1    | 0.0682  | 1.90E-01 | 3.04E-01 |
| EIF2AK1 | 0.0153  | 7.69E-01 | 8.45E-01 |
| EIF2AK2 | 0.0744  | 1.53E-01 | 2.57E-01 |
| EIF2AK3 | -0.0169 | 7.45E-01 | 8.28E-01 |
| EIF2AK4 | -0.2058 | 6.50E-05 | 4.23E-04 |
| EIF2A   | 0.1248  | 1.62E-02 | 4.32E-02 |
| EIF2B1  | 0.2068  | 5.98E-05 | 3.93E-04 |
| EIF2B2  | -0.1498 | 3.84E-03 | 1.33E-02 |
| EIF2B3  | -0.0103 | 8.44E-01 | 8.98E-01 |
| EIF2B4  | 0.0666  | 2.00E-01 | 3.17E-01 |
| EIF2B5  | 0.1802  | 4.86E-04 | 2.32E-03 |
| EIF2C1  | 0.0995  | 5.54E-02 | 1.17E-01 |
| EIF2C2  | 0.1583  | 2.23E-03 | 8.42E-03 |
| EIF2C3  | -0.0137 | 7.93E-01 | 8.63E-01 |
| EIF2C4  | -0.0821 | 1.14E-01 | 2.06E-01 |
| EIF2S1  | -0.0572 | 2.72E-01 | 4.00E-01 |
| EIF2S2  | 0.1341  | 9.69E-03 | 2.85E-02 |
| EIF2S3  | 0.1722  | 8.66E-04 | 3.80E-03 |
| EIF3A   | -0.0494 | 3.43E-01 | 4.74E-01 |
| EIF3B   | 0.1948  | 1.60E-04 | 9.10E-04 |
| EIF3CL  | -0.0225 | 6.65E-01 | 7.65E-01 |
| EIF3C   | -0.0038 | 9.42E-01 | 9.64E-01 |
| EIF3D   | 0.2579  | 4.77E-07 | 5.87E-06 |
| EIF3E   | 0.0232  | 6.56E-01 | 7.58E-01 |
| EIF3F   | 0.0577  | 2.67E-01 | 3.95E-01 |
| EIF3G   | 0.0042  | 9.36E-01 | 9.60E-01 |
| EIF3H   | 0.0572  | 2.72E-01 | 4.00E-01 |
| EIF3IP1 | 0.1334  | 1.01E-02 | 2.94E-02 |
| EIF3I   | -0.0107 | 8.38E-01 | 8.93E-01 |
| EIF3J   | -0.0370 | 4.77E-01 | 6.06E-01 |
| EIF3K   | -0.0059 | 9.10E-01 | 9.43E-01 |
| EIF3L   | 0.0497  | 3.40E-01 | 4.71E-01 |
| EIF3M   | 0.1711  | 9.38E-04 | 4.07E-03 |
| EIF4A1  | -0.0188 | 7.18E-01 | 8.09E-01 |

|           |         |          |          |
|-----------|---------|----------|----------|
| EIF4A2    | 0.0520  | 3.18E-01 | 4.48E-01 |
| EIF4A3    | 0.3139  | 6.28E-10 | 1.56E-08 |
| EIF4B     | -0.0473 | 3.64E-01 | 4.96E-01 |
| EIF4E1B   | 0.0307  | 5.56E-01 | 6.75E-01 |
| EIF4E2    | 0.1234  | 1.74E-02 | 4.58E-02 |
| EIF4E3    | -0.0242 | 6.42E-01 | 7.48E-01 |
| EIF4EBP1  | 0.0417  | 4.23E-01 | 5.56E-01 |
| EIF4EBP2  | -0.0719 | 1.67E-01 | 2.75E-01 |
| EIF4EBP3  | -0.1608 | 1.89E-03 | 7.34E-03 |
| EIF4ENIF1 | 0.2640  | 2.47E-07 | 3.28E-06 |
| EIF4E     | -0.1046 | 4.41E-02 | 9.74E-02 |
| EIF4G1    | -0.1120 | 3.11E-02 | 7.35E-02 |
| EIF4G2    | -0.0241 | 6.44E-01 | 7.49E-01 |
| EIF4G3    | -0.1258 | 1.53E-02 | 4.13E-02 |
| EIF4H     | -0.1325 | 1.06E-02 | 3.06E-02 |
| EIF5A2    | 0.0880  | 9.04E-02 | 1.72E-01 |
| EIF5AL1   | -0.1200 | 2.08E-02 | 5.30E-02 |
| EIF5A     | -0.1013 | 5.13E-02 | 1.10E-01 |
| EIF5B     | 0.0036  | 9.46E-01 | 9.66E-01 |
| EIF5      | -0.1420 | 6.14E-03 | 1.95E-02 |
| EIF6      | 0.0331  | 5.25E-01 | 6.48E-01 |
| ELAC1     | 0.0066  | 9.00E-01 | 9.37E-01 |
| ELAC2     | -0.0770 | 1.39E-01 | 2.39E-01 |
| ELANE     | -0.0631 | 2.25E-01 | 3.47E-01 |
| ELAVL1    | 0.0504  | 3.33E-01 | 4.64E-01 |
| ELAVL2    | -0.0954 | 6.64E-02 | 1.34E-01 |
| ELAVL3    | 0.0751  | 1.49E-01 | 2.53E-01 |
| ELAVL4    | 0.1171  | 2.41E-02 | 5.98E-02 |
| ELF1      | -0.0130 | 8.02E-01 | 8.70E-01 |
| ELF2      | 0.0689  | 1.86E-01 | 2.99E-01 |
| ELF3      | 0.1847  | 3.48E-04 | 1.77E-03 |
| ELF4      | 0.1090  | 3.59E-02 | 8.26E-02 |
| ELF5      | 0.0077  | 8.82E-01 | 9.25E-01 |
| ELFN1     | -0.2925 | 9.47E-09 | 1.77E-07 |
| ELFN2     | 0.0679  | 1.92E-01 | 3.07E-01 |
| ELK1      | 0.0408  | 4.33E-01 | 5.65E-01 |
| ELK3      | -0.1381 | 7.75E-03 | 2.37E-02 |
| ELK4      | 0.0797  | 1.25E-01 | 2.21E-01 |
| ELL2      | -0.0802 | 1.23E-01 | 2.18E-01 |
| ELL3      | -0.0053 | 9.19E-01 | 9.49E-01 |
| ELL       | 0.0451  | 3.86E-01 | 5.19E-01 |
| ELMO1     | -0.0822 | 1.14E-01 | 2.06E-01 |
| ELMO2     | 0.0462  | 3.75E-01 | 5.08E-01 |
| ELMO3     | 0.0089  | 8.64E-01 | 9.12E-01 |

|         |         |          |          |
|---------|---------|----------|----------|
| ELMOD1  | -0.0795 | 1.26E-01 | 2.22E-01 |
| ELMOD2  | -0.2177 | 2.34E-05 | 1.77E-04 |
| ELMOD3  | 0.0418  | 4.22E-01 | 5.55E-01 |
| ELN     | -0.1743 | 7.48E-04 | 3.35E-03 |
| ELOF1   | -0.0803 | 1.23E-01 | 2.18E-01 |
| ELOVL1  | 0.0989  | 5.71E-02 | 1.19E-01 |
| ELOVL2  | -0.0535 | 3.04E-01 | 4.33E-01 |
| ELOVL3  | 0.1973  | 1.31E-04 | 7.69E-04 |
| ELOVL4  | 0.0152  | 7.70E-01 | 8.45E-01 |
| ELOVL5  | -0.1682 | 1.15E-03 | 4.84E-03 |
| ELOVL6  | -0.1678 | 1.18E-03 | 4.93E-03 |
| ELOVL7  | 0.1531  | 3.10E-03 | 1.11E-02 |
| ELP2P   | 0.1607  | 1.90E-03 | 7.37E-03 |
| ELP2    | -0.0682 | 1.90E-01 | 3.04E-01 |
| ELP3    | -0.0534 | 3.05E-01 | 4.34E-01 |
| ELP4    | 0.1771  | 6.12E-04 | 2.82E-03 |
| ELSPBP1 | 0.0258  | 6.21E-01 | 7.30E-01 |
| ELTD1   | -0.2299 | 7.72E-06 | 6.69E-05 |
| EMB     | -0.0898 | 8.42E-02 | 1.62E-01 |
| EMCN    | -0.2648 | 2.27E-07 | 3.03E-06 |
| EMD     | 0.1870  | 2.93E-04 | 1.53E-03 |
| EME1    | 0.4485  | 9.33E-20 | 2.24E-17 |
| EME2    | 0.1261  | 1.51E-02 | 4.09E-02 |
| EMG1    | 0.1406  | 6.69E-03 | 2.10E-02 |
| EMID1   | 0.1163  | 2.51E-02 | 6.17E-02 |
| EMID2   | -0.1824 | 4.13E-04 | 2.03E-03 |
| EMILIN1 | -0.1006 | 5.29E-02 | 1.12E-01 |
| EMILIN2 | 0.0797  | 1.25E-01 | 2.21E-01 |
| EMILIN3 | 0.1002  | 5.38E-02 | 1.14E-01 |
| EML1    | -0.1062 | 4.08E-02 | 9.17E-02 |
| EML2    | 0.1420  | 6.13E-03 | 1.95E-02 |
| EML3    | -0.0856 | 9.99E-02 | 1.86E-01 |
| EML4    | 0.1353  | 9.08E-03 | 2.71E-02 |
| EML5    | -0.0626 | 2.29E-01 | 3.52E-01 |
| EML6    | 0.0822  | 1.14E-01 | 2.06E-01 |
| EMP1    | -0.2404 | 2.81E-06 | 2.80E-05 |
| EMP2    | -0.0245 | 6.38E-01 | 7.45E-01 |
| EMP3    | -0.0205 | 6.94E-01 | 7.89E-01 |
| EMR1    | -0.0932 | 7.28E-02 | 1.45E-01 |
| EMR2    | -0.0654 | 2.09E-01 | 3.27E-01 |
| EMR3    | 0.0204  | 6.95E-01 | 7.89E-01 |
| EMR4P   | -0.0163 | 7.54E-01 | 8.35E-01 |
| EMX1    | 0.0541  | 2.99E-01 | 4.28E-01 |
| EMX2OS  | -0.1157 | 2.58E-02 | 6.32E-02 |

|         |         |          |          |
|---------|---------|----------|----------|
| EMX2    | -0.0984 | 5.83E-02 | 1.21E-01 |
| EN1     | 0.1278  | 1.37E-02 | 3.80E-02 |
| EN2     | 0.1406  | 6.68E-03 | 2.10E-02 |
| ENAH    | 0.2343  | 5.07E-06 | 4.69E-05 |
| ENAM    | 0.1678  | 1.18E-03 | 4.95E-03 |
| ENC1    | 0.0570  | 2.74E-01 | 4.02E-01 |
| ENDOD1  | -0.1256 | 1.55E-02 | 4.17E-02 |
| ENDOG   | -0.1705 | 9.79E-04 | 4.22E-03 |
| ENDOU   | -0.1171 | 2.41E-02 | 5.99E-02 |
| ENGASE  | 0.2641  | 2.46E-07 | 3.27E-06 |
| ENG     | -0.2902 | 1.25E-08 | 2.26E-07 |
| ENHO    | -0.0538 | 3.01E-01 | 4.30E-01 |
| ENKUR   | -0.0807 | 1.21E-01 | 2.15E-01 |
| ENO1    | 0.0623  | 2.32E-01 | 3.55E-01 |
| ENO2    | 0.0976  | 6.03E-02 | 1.25E-01 |
| ENO3    | -0.2251 | 1.21E-05 | 9.88E-05 |
| ENOPH1  | 0.1703  | 9.93E-04 | 4.28E-03 |
| ENOSF1  | -0.1378 | 7.87E-03 | 2.40E-02 |
| ENOX1   | -0.0412 | 4.29E-01 | 5.61E-01 |
| ENOX2   | 0.1972  | 1.32E-04 | 7.76E-04 |
| ENPEP   | -0.3110 | 9.15E-10 | 2.19E-08 |
| ENPP1   | -0.0802 | 1.23E-01 | 2.18E-01 |
| ENPP2   | 0.1124  | 3.04E-02 | 7.23E-02 |
| ENPP3   | -0.0300 | 5.65E-01 | 6.83E-01 |
| ENPP4   | 0.0806  | 1.21E-01 | 2.16E-01 |
| ENPP5   | 0.0720  | 1.66E-01 | 2.74E-01 |
| ENPP6   | 0.0934  | 7.24E-02 | 1.44E-01 |
| ENPP7   | -0.1521 | 3.31E-03 | 1.17E-02 |
| ENSA    | 0.4480  | 1.03E-19 | 2.42E-17 |
| ENTHD1  | 0.0706  | 1.75E-01 | 2.86E-01 |
| ENTPD1  | -0.0312 | 5.49E-01 | 6.69E-01 |
| ENTPD2  | 0.2220  | 1.60E-05 | 1.27E-04 |
| ENTPD3  | 0.0715  | 1.69E-01 | 2.78E-01 |
| ENTPD4  | -0.0028 | 9.57E-01 | 9.73E-01 |
| ENTPD5  | -0.1916 | 2.05E-04 | 1.13E-03 |
| ENTPD6  | 0.2056  | 6.63E-05 | 4.29E-04 |
| ENTPD7  | -0.0532 | 3.07E-01 | 4.36E-01 |
| ENTPD8  | -0.0866 | 9.57E-02 | 1.80E-01 |
| ENY2    | 0.0024  | 9.64E-01 | 9.77E-01 |
| EOMES   | -0.1047 | 4.40E-02 | 9.71E-02 |
| EP300   | 0.0342  | 5.12E-01 | 6.36E-01 |
| EP400NL | 0.0611  | 2.40E-01 | 3.64E-01 |
| EP400   | 0.2152  | 2.91E-05 | 2.14E-04 |
| EPAS1   | -0.2533 | 7.71E-07 | 8.99E-06 |

|          |         |          |          |
|----------|---------|----------|----------|
| EPB41L1  | 0.0794  | 1.27E-01 | 2.23E-01 |
| EPB41L2  | 0.1169  | 2.44E-02 | 6.03E-02 |
| EPB41L3  | -0.1587 | 2.17E-03 | 8.25E-03 |
| EPB41L4A | -0.0139 | 7.90E-01 | 8.61E-01 |
| EPB41L4B | -0.0875 | 9.23E-02 | 1.75E-01 |
| EPB41L5  | -0.0386 | 4.58E-01 | 5.89E-01 |
| EPB41    | -0.0272 | 6.01E-01 | 7.14E-01 |
| EPB42    | -0.1950 | 1.57E-04 | 8.96E-04 |
| EPB49    | -0.0225 | 6.65E-01 | 7.65E-01 |
| EPC1     | 0.0156  | 7.64E-01 | 8.41E-01 |
| EPC2     | 0.0922  | 7.63E-02 | 1.50E-01 |
| EPCAM    | 0.1729  | 8.24E-04 | 3.64E-03 |
| EPDR1    | -0.0625 | 2.30E-01 | 3.52E-01 |
| EPGN     | 0.1607  | 1.91E-03 | 7.39E-03 |
| EPHA10   | 0.2146  | 3.06E-05 | 2.23E-04 |
| EPHA1    | -0.0183 | 7.25E-01 | 8.14E-01 |
| EPHA2    | -0.1879 | 2.73E-04 | 1.44E-03 |
| EPHA3    | -0.0986 | 5.79E-02 | 1.21E-01 |
| EPHA4    | -0.1597 | 2.04E-03 | 7.82E-03 |
| EPHA5    | 0.0575  | 2.69E-01 | 3.97E-01 |
| EPHA6    | 0.1349  | 9.26E-03 | 2.75E-02 |
| EPHA7    | -0.1269 | 1.45E-02 | 3.96E-02 |
| EPHA8    | 0.0921  | 7.66E-02 | 1.51E-01 |
| EPHB1    | -0.0370 | 4.77E-01 | 6.06E-01 |
| EPHB2    | -0.0286 | 5.83E-01 | 6.99E-01 |
| EPHB3    | 0.1626  | 1.68E-03 | 6.66E-03 |
| EPHB4    | -0.0205 | 6.94E-01 | 7.89E-01 |
| EPHB6    | 0.0903  | 8.24E-02 | 1.60E-01 |
| EPHX1    | -0.0738 | 1.56E-01 | 2.61E-01 |
| EPHX2    | -0.2023 | 8.71E-05 | 5.42E-04 |
| EPHX3    | 0.0273  | 6.00E-01 | 7.13E-01 |
| EPHX4    | 0.2372  | 3.84E-06 | 3.70E-05 |
| EPM2AIP1 | -0.1318 | 1.10E-02 | 3.16E-02 |
| EPM2A    | -0.1571 | 2.41E-03 | 8.98E-03 |
| EPN1     | -0.1603 | 1.96E-03 | 7.55E-03 |
| EPN2     | 0.1221  | 1.87E-02 | 4.86E-02 |
| EPN3     | 0.1452  | 5.09E-03 | 1.67E-02 |
| EPOR     | 0.1431  | 5.75E-03 | 1.85E-02 |
| EPO      | 0.1147  | 2.72E-02 | 6.60E-02 |
| EPPK1    | 0.2449  | 1.80E-06 | 1.91E-05 |
| EPR1     | 0.3466  | 6.51E-12 | 2.44E-10 |
| EPRS     | 0.2655  | 2.09E-07 | 2.82E-06 |
| EPS15L1  | 0.2458  | 1.66E-06 | 1.77E-05 |
| EPS15    | -0.0804 | 1.22E-01 | 2.17E-01 |

|         |         |          |          |
|---------|---------|----------|----------|
| EPS8L1  | 0.1160  | 2.54E-02 | 6.23E-02 |
| EPS8L2  | 0.1404  | 6.77E-03 | 2.12E-02 |
| EPS8L3  | 0.2417  | 2.49E-06 | 2.52E-05 |
| EPS8    | -0.0827 | 1.12E-01 | 2.03E-01 |
| EPST11  | -0.0781 | 1.33E-01 | 2.32E-01 |
| EPT1    | -0.1038 | 4.57E-02 | 1.00E-01 |
| EPX     | -0.0012 | 9.82E-01 | 9.88E-01 |
| EPYC    | 0.1171  | 2.41E-02 | 5.99E-02 |
| ERAL1   | 0.1604  | 1.94E-03 | 7.52E-03 |
| ERAP1   | -0.1315 | 1.13E-02 | 3.22E-02 |
| ERAP2   | 0.0990  | 5.67E-02 | 1.19E-01 |
| ERAS    | 0.0895  | 8.52E-02 | 1.64E-01 |
| ERBB2IP | -0.0681 | 1.91E-01 | 3.05E-01 |
| ERBB2   | -0.1507 | 3.61E-03 | 1.26E-02 |
| ERBB3   | 0.1365  | 8.45E-03 | 2.55E-02 |
| ERBB4   | 0.0130  | 8.02E-01 | 8.70E-01 |
| ERC1    | -0.0756 | 1.46E-01 | 2.49E-01 |
| ERC2    | 0.0111  | 8.31E-01 | 8.89E-01 |
| ERCC1   | 0.0587  | 2.60E-01 | 3.86E-01 |
| ERCC2   | 0.0056  | 9.14E-01 | 9.46E-01 |
| ERCC3   | 0.2285  | 8.81E-06 | 7.52E-05 |
| ERCC4   | -0.1074 | 3.88E-02 | 8.79E-02 |
| ERCC5   | -0.0149 | 7.75E-01 | 8.50E-01 |
| ERCC6L  | 0.4189  | 3.36E-17 | 3.77E-15 |
| ERCC6   | 0.1022  | 4.91E-02 | 1.06E-01 |
| ERCC8   | 0.0378  | 4.67E-01 | 5.97E-01 |
| EREG    | -0.0113 | 8.28E-01 | 8.88E-01 |
| ERF     | 0.0673  | 1.96E-01 | 3.12E-01 |
| ERGIC1  | -0.1971 | 1.33E-04 | 7.81E-04 |
| ERGIC2  | 0.0484  | 3.53E-01 | 4.84E-01 |
| ERGIC3  | -0.0296 | 5.70E-01 | 6.88E-01 |
| ERG     | -0.2543 | 6.93E-07 | 8.17E-06 |
| ERH     | 0.1882  | 2.67E-04 | 1.41E-03 |
| ERI1    | 0.0818  | 1.16E-01 | 2.08E-01 |
| ERI2    | -0.0948 | 6.82E-02 | 1.37E-01 |
| ERI3    | 0.1457  | 4.93E-03 | 1.63E-02 |
| ERICH1  | 0.0494  | 3.43E-01 | 4.74E-01 |
| ERLEC1  | 0.0696  | 1.81E-01 | 2.93E-01 |
| ERLIN1  | -0.1791 | 5.29E-04 | 2.49E-03 |
| ERLIN2  | -0.1203 | 2.04E-02 | 5.22E-02 |
| ERMAP   | -0.1763 | 6.45E-04 | 2.95E-03 |
| ERMN    | 0.0475  | 3.61E-01 | 4.94E-01 |
| ERMP1   | -0.0043 | 9.34E-01 | 9.59E-01 |
| ERN1    | -0.0709 | 1.73E-01 | 2.83E-01 |



|          |         |          |          |
|----------|---------|----------|----------|
| ERN2     | 0.0256  | 6.23E-01 | 7.32E-01 |
| ERO1LB   | 0.1170  | 2.42E-02 | 5.99E-02 |
| ERO1L    | 0.0149  | 7.75E-01 | 8.49E-01 |
| ERP27    | 0.0799  | 1.24E-01 | 2.20E-01 |
| ERP29    | -0.1227 | 1.81E-02 | 4.73E-02 |
| ERP44    | -0.0491 | 3.45E-01 | 4.77E-01 |
| ERRF1    | -0.1058 | 4.16E-02 | 9.30E-02 |
| ERVFRDE1 | -0.1258 | 1.53E-02 | 4.14E-02 |
| ESAM     | -0.1634 | 1.59E-03 | 6.36E-03 |
| ESCO1    | 0.1313  | 1.14E-02 | 3.24E-02 |
| ESCO2    | 0.3343  | 3.88E-11 | 1.25E-09 |
| ESD      | -0.1777 | 5.87E-04 | 2.72E-03 |
| ESF1     | 0.0312  | 5.49E-01 | 6.69E-01 |
| ESM1     | 0.1370  | 8.26E-03 | 2.50E-02 |
| ESPL1    | 0.3916  | 4.78E-15 | 3.32E-13 |
| ESPNL    | 0.0299  | 5.66E-01 | 6.83E-01 |
| ESPNP    | 0.0154  | 7.67E-01 | 8.43E-01 |
| ESPN     | -0.1267 | 1.46E-02 | 3.98E-02 |
| ESR1     | -0.3346 | 3.70E-11 | 1.20E-09 |
| ESR2     | 0.0690  | 1.85E-01 | 2.97E-01 |
| ESRP1    | 0.1358  | 8.83E-03 | 2.64E-02 |
| ESRP2    | -0.2815 | 3.46E-08 | 5.60E-07 |
| ESRRA    | -0.1465 | 4.69E-03 | 1.56E-02 |
| ESRRB    | -0.0204 | 6.96E-01 | 7.90E-01 |
| ESRRG    | 0.0592  | 2.56E-01 | 3.81E-01 |
| ESX1     | 0.1509  | 3.57E-03 | 1.25E-02 |
| ESYT1    | -0.0825 | 1.13E-01 | 2.04E-01 |
| ESYT2    | -0.1280 | 1.36E-02 | 3.77E-02 |
| ESYT3    | 0.2072  | 5.79E-05 | 3.84E-04 |
| ETAA1    | 0.1000  | 5.44E-02 | 1.15E-01 |
| ETF1     | -0.0254 | 6.26E-01 | 7.35E-01 |
| ETFA     | -0.4218 | 1.96E-17 | 2.39E-15 |
| ETFB     | -0.1894 | 2.43E-04 | 1.30E-03 |
| ETFDH    | -0.4051 | 4.40E-16 | 3.84E-14 |
| ETHE1    | -0.1994 | 1.11E-04 | 6.64E-04 |
| ETNK1    | 0.1352  | 9.12E-03 | 2.72E-02 |
| ETNK2    | -0.1253 | 1.57E-02 | 4.23E-02 |
| ETS1     | -0.1840 | 3.67E-04 | 1.85E-03 |
| ETS2     | -0.0779 | 1.34E-01 | 2.33E-01 |
| ETV1     | -0.0511 | 3.27E-01 | 4.57E-01 |
| ETV2     | 0.0535  | 3.04E-01 | 4.33E-01 |
| ETV3L    | 0.1369  | 8.28E-03 | 2.50E-02 |
| ETV3     | 0.0498  | 3.38E-01 | 4.70E-01 |
| ETV4     | 0.2145  | 3.10E-05 | 2.25E-04 |

|         |         |          |          |
|---------|---------|----------|----------|
| ETV5    | 0.1354  | 9.01E-03 | 2.69E-02 |
| ETV6    | 0.0930  | 7.36E-02 | 1.46E-01 |
| ETV7    | 0.1203  | 2.05E-02 | 5.23E-02 |
| EVC2    | 0.2704  | 1.23E-07 | 1.75E-06 |
| EVC     | 0.1552  | 2.73E-03 | 9.98E-03 |
| EVI2A   | -0.0826 | 1.12E-01 | 2.03E-01 |
| EVI2B   | -0.0956 | 6.57E-02 | 1.34E-01 |
| EVI5L   | -0.0081 | 8.76E-01 | 9.20E-01 |
| EVI5    | -0.0899 | 8.37E-02 | 1.61E-01 |
| EVL     | -0.0340 | 5.14E-01 | 6.38E-01 |
| EVPLL   | 0.0866  | 9.58E-02 | 1.80E-01 |
| EVPL    | 0.1361  | 8.67E-03 | 2.60E-02 |
| EVX1    | 0.1419  | 6.17E-03 | 1.96E-02 |
| EWSR1   | 0.3975  | 1.70E-15 | 1.29E-13 |
| EXD1    | 0.0806  | 1.21E-01 | 2.16E-01 |
| EXD2    | 0.0008  | 9.88E-01 | 9.93E-01 |
| EXD3    | 0.2122  | 3.78E-05 | 2.67E-04 |
| EXO1    | 0.4900  | 8.30E-24 | 3.76E-21 |
| EXOC1   | 0.0878  | 9.13E-02 | 1.73E-01 |
| EXOC2   | 0.0651  | 2.11E-01 | 3.29E-01 |
| EXOC3L2 | -0.2125 | 3.67E-05 | 2.61E-04 |
| EXOC3L  | -0.1100 | 3.42E-02 | 7.96E-02 |
| EXOC3   | 0.1733  | 8.05E-04 | 3.57E-03 |
| EXOC4   | -0.0875 | 9.23E-02 | 1.75E-01 |
| EXOC5   | -0.0248 | 6.34E-01 | 7.41E-01 |
| EXOC6B  | -0.0079 | 8.80E-01 | 9.23E-01 |
| EXOC6   | 0.2256  | 1.15E-05 | 9.50E-05 |
| EXOC7   | 0.1626  | 1.68E-03 | 6.65E-03 |
| EXOC8   | 0.1669  | 1.25E-03 | 5.19E-03 |
| EXOG    | 0.2557  | 5.97E-07 | 7.13E-06 |
| EXOSC10 | 0.1658  | 1.35E-03 | 5.53E-03 |
| EXOSC1  | 0.0520  | 3.18E-01 | 4.48E-01 |
| EXOSC2  | 0.3440  | 9.54E-12 | 3.43E-10 |
| EXOSC3  | 0.3174  | 3.95E-10 | 1.03E-08 |
| EXOSC4  | -0.0295 | 5.71E-01 | 6.89E-01 |
| EXOSC5  | 0.0846  | 1.04E-01 | 1.91E-01 |
| EXOSC6  | -0.1716 | 9.05E-04 | 3.95E-03 |
| EXOSC7  | 0.0526  | 3.12E-01 | 4.42E-01 |
| EXOSC8  | 0.2012  | 9.54E-05 | 5.86E-04 |
| EXOSC9  | 0.2163  | 2.64E-05 | 1.97E-04 |
| EXPH5   | -0.1702 | 9.95E-04 | 4.28E-03 |
| EXT1    | 0.0218  | 6.76E-01 | 7.74E-01 |
| EXT2    | -0.0688 | 1.86E-01 | 2.99E-01 |
| EXTL1   | 0.0015  | 9.77E-01 | 9.85E-01 |

|         |         |          |          |
|---------|---------|----------|----------|
| EXTL2   | 0.0821  | 1.14E-01 | 2.06E-01 |
| EXTL3   | 0.0678  | 1.92E-01 | 3.07E-01 |
| EYA1    | 0.1484  | 4.19E-03 | 1.43E-02 |
| EYA2    | 0.1071  | 3.93E-02 | 8.88E-02 |
| EYA3    | 0.0110  | 8.33E-01 | 8.91E-01 |
| EYA4    | 0.1013  | 5.12E-02 | 1.10E-01 |
| EYS     | -0.1207 | 2.01E-02 | 5.16E-02 |
| EZH1    | 0.2647  | 2.30E-07 | 3.06E-06 |
| EZH2    | 0.4526  | 3.89E-20 | 1.01E-17 |
| EZR     | 0.1629  | 1.65E-03 | 6.55E-03 |
| F10     | -0.1067 | 4.00E-02 | 9.01E-02 |
| F11R    | 0.0972  | 6.14E-02 | 1.27E-01 |
| F11     | -0.2648 | 2.27E-07 | 3.03E-06 |
| F12     | -0.1854 | 3.30E-04 | 1.69E-03 |
| F13A1   | -0.1212 | 1.95E-02 | 5.04E-02 |
| F13B    | -0.1679 | 1.17E-03 | 4.91E-03 |
| F2RL1   | 0.0154  | 7.67E-01 | 8.43E-01 |
| F2RL2   | -0.0174 | 7.39E-01 | 8.24E-01 |
| F2RL3   | -0.0803 | 1.23E-01 | 2.18E-01 |
| F2R     | -0.1239 | 1.69E-02 | 4.49E-02 |
| F2      | -0.1084 | 3.68E-02 | 8.44E-02 |
| F3      | 0.0101  | 8.46E-01 | 8.99E-01 |
| F5      | -0.0637 | 2.21E-01 | 3.41E-01 |
| F7      | -0.1335 | 1.00E-02 | 2.93E-02 |
| F8A1    | 0.0322  | 5.37E-01 | 6.59E-01 |
| F8      | -0.1617 | 1.78E-03 | 6.99E-03 |
| F9      | -0.2262 | 1.08E-05 | 9.01E-05 |
| FA2H    | 0.0562  | 2.81E-01 | 4.09E-01 |
| FAAH2   | -0.0813 | 1.18E-01 | 2.11E-01 |
| FAAH    | -0.1174 | 2.38E-02 | 5.91E-02 |
| FABP12  | 0.0127  | 8.07E-01 | 8.73E-01 |
| FABP1   | -0.1297 | 1.24E-02 | 3.48E-02 |
| FABP2   | 0.0042  | 9.36E-01 | 9.60E-01 |
| FABP3   | -0.0557 | 2.85E-01 | 4.14E-01 |
| FABP4   | -0.2232 | 1.43E-05 | 1.15E-04 |
| FABP5L3 | 0.1819  | 4.29E-04 | 2.09E-03 |
| FABP5   | 0.0864  | 9.67E-02 | 1.81E-01 |
| FABP6   | 0.1712  | 9.32E-04 | 4.05E-03 |
| FABP7   | 0.0522  | 3.16E-01 | 4.46E-01 |
| FABP9   | -0.0563 | 2.80E-01 | 4.08E-01 |
| FADD    | 0.0215  | 6.80E-01 | 7.78E-01 |
| FADS1   | 0.0370  | 4.77E-01 | 6.06E-01 |
| FADS2   | -0.0377 | 4.69E-01 | 5.98E-01 |
| FADS3   | 0.0013  | 9.80E-01 | 9.87E-01 |

|          |         |          |          |
|----------|---------|----------|----------|
| FADS6    | 0.0794  | 1.27E-01 | 2.23E-01 |
| FAF1     | 0.1679  | 1.17E-03 | 4.90E-03 |
| FAF2     | 0.1679  | 1.17E-03 | 4.91E-03 |
| FAHD1    | -0.1656 | 1.37E-03 | 5.59E-03 |
| FAHD2A   | -0.3804 | 3.22E-14 | 1.89E-12 |
| FAHD2B   | 0.0878  | 9.14E-02 | 1.73E-01 |
| FAH      | -0.2679 | 1.62E-07 | 2.24E-06 |
| FAIM2    | -0.1137 | 2.86E-02 | 6.88E-02 |
| FAIM3    | -0.0055 | 9.15E-01 | 9.47E-01 |
| FAIM     | 0.1136  | 2.87E-02 | 6.90E-02 |
| FAM100A  | -0.0919 | 7.72E-02 | 1.51E-01 |
| FAM100B  | 0.1865  | 3.05E-04 | 1.58E-03 |
| FAM101A  | 0.0528  | 3.10E-01 | 4.40E-01 |
| FAM101B  | -0.1390 | 7.33E-03 | 2.26E-02 |
| FAM102A  | 0.0927  | 7.45E-02 | 1.47E-01 |
| FAM102B  | 0.1792  | 5.24E-04 | 2.47E-03 |
| FAM103A1 | 0.1423  | 6.04E-03 | 1.93E-02 |
| FAM104A  | 0.3468  | 6.33E-12 | 2.38E-10 |
| FAM104B  | 0.0530  | 3.08E-01 | 4.38E-01 |
| FAM105A  | 0.0251  | 6.30E-01 | 7.37E-01 |
| FAM105B  | 0.0802  | 1.23E-01 | 2.18E-01 |
| FAM106A  | 0.0425  | 4.14E-01 | 5.47E-01 |
| FAM106C  | 0.0510  | 3.27E-01 | 4.58E-01 |
| FAM107A  | -0.2726 | 9.58E-08 | 1.40E-06 |
| FAM107B  | -0.2114 | 4.04E-05 | 2.82E-04 |
| FAM108A1 | 0.0498  | 3.39E-01 | 4.70E-01 |
| FAM108B1 | -0.0438 | 4.00E-01 | 5.33E-01 |
| FAM108C1 | 0.1946  | 1.62E-04 | 9.19E-04 |
| FAM109A  | 0.1732  | 8.05E-04 | 3.57E-03 |
| FAM109B  | 0.0807  | 1.21E-01 | 2.15E-01 |
| FAM10A4  | 0.0037  | 9.43E-01 | 9.65E-01 |
| FAM110A  | 0.2325  | 6.03E-06 | 5.44E-05 |
| FAM110B  | 0.0475  | 3.61E-01 | 4.93E-01 |
| FAM110C  | -0.0168 | 7.47E-01 | 8.30E-01 |
| FAM111A  | 0.2575  | 4.95E-07 | 6.07E-06 |
| FAM111B  | 0.3690  | 2.08E-13 | 1.05E-11 |
| FAM113A  | 0.0551  | 2.90E-01 | 4.19E-01 |
| FAM113B  | 0.0790  | 1.29E-01 | 2.26E-01 |
| FAM114A1 | -0.0976 | 6.05E-02 | 1.25E-01 |
| FAM114A2 | -0.1876 | 2.81E-04 | 1.47E-03 |
| FAM115A  | -0.1592 | 2.09E-03 | 8.01E-03 |
| FAM115C  | -0.0155 | 7.65E-01 | 8.42E-01 |
| FAM116A  | 0.1610  | 1.86E-03 | 7.24E-03 |
| FAM116B  | 0.0490  | 3.47E-01 | 4.79E-01 |

|           |         |          |          |
|-----------|---------|----------|----------|
| FAM117A   | -0.1850 | 3.40E-04 | 1.73E-03 |
| FAM117B   | 0.2256  | 1.15E-05 | 9.49E-05 |
| FAM118A   | 0.1942  | 1.67E-04 | 9.45E-04 |
| FAM118B   | 0.0598  | 2.51E-01 | 3.76E-01 |
| FAM119A   | 0.2398  | 2.99E-06 | 2.96E-05 |
| FAM119B   | -0.0730 | 1.61E-01 | 2.67E-01 |
| FAM120AOS | 0.2140  | 3.23E-05 | 2.33E-04 |
| FAM120A   | -0.1216 | 1.91E-02 | 4.95E-02 |
| FAM120B   | 0.0265  | 6.11E-01 | 7.22E-01 |
| FAM120C   | -0.0064 | 9.02E-01 | 9.38E-01 |
| FAM122A   | -0.0982 | 5.88E-02 | 1.22E-01 |
| FAM122B   | 0.3343  | 3.89E-11 | 1.25E-09 |
| FAM122C   | 0.1450  | 5.13E-03 | 1.69E-02 |
| FAM123A   | 0.0161  | 7.57E-01 | 8.37E-01 |
| FAM123B   | 0.0823  | 1.13E-01 | 2.05E-01 |
| FAM123C   | 0.0558  | 2.84E-01 | 4.12E-01 |
| FAM124A   | 0.0089  | 8.64E-01 | 9.12E-01 |
| FAM124B   | -0.1321 | 1.09E-02 | 3.12E-02 |
| FAM125A   | 0.0780  | 1.34E-01 | 2.32E-01 |
| FAM125B   | 0.0974  | 6.10E-02 | 1.26E-01 |
| FAM126A   | -0.0589 | 2.58E-01 | 3.84E-01 |
| FAM126B   | 0.0523  | 3.15E-01 | 4.45E-01 |
| FAM127A   | 0.1286  | 1.32E-02 | 3.67E-02 |
| FAM127B   | 0.1820  | 4.26E-04 | 2.08E-03 |
| FAM127C   | 0.0562  | 2.80E-01 | 4.09E-01 |
| FAM128A   | 0.1706  | 9.69E-04 | 4.19E-03 |
| FAM128B   | 0.1354  | 9.04E-03 | 2.70E-02 |
| FAM129A   | -0.1275 | 1.40E-02 | 3.86E-02 |
| FAM129B   | 0.0750  | 1.49E-01 | 2.53E-01 |
| FAM129C   | 0.0329  | 5.28E-01 | 6.51E-01 |
| FAM131A   | 0.2313  | 6.77E-06 | 6.01E-05 |
| FAM131B   | -0.0459 | 3.78E-01 | 5.11E-01 |
| FAM131C   | 0.0466  | 3.71E-01 | 5.04E-01 |
| FAM132A   | 0.0319  | 5.41E-01 | 6.62E-01 |
| FAM133A   | 0.1394  | 7.17E-03 | 2.22E-02 |
| FAM133B   | -0.0456 | 3.81E-01 | 5.15E-01 |
| FAM134A   | -0.0160 | 7.59E-01 | 8.38E-01 |
| FAM134B   | -0.1565 | 2.50E-03 | 9.27E-03 |
| FAM134C   | 0.0291  | 5.76E-01 | 6.93E-01 |
| FAM135A   | 0.0879  | 9.08E-02 | 1.72E-01 |
| FAM135B   | -0.0183 | 7.25E-01 | 8.13E-01 |
| FAM136A   | 0.1716  | 9.03E-04 | 3.94E-03 |
| FAM136B   | 0.1300  | 1.22E-02 | 3.44E-02 |
| FAM138B   | 0.0755  | 1.47E-01 | 2.50E-01 |

|          |         |          |          |
|----------|---------|----------|----------|
| FAM138D  | 0.0364  | 4.84E-01 | 6.12E-01 |
| FAM138E  | 0.0487  | 3.49E-01 | 4.82E-01 |
| FAM138F  | 0.0044  | 9.33E-01 | 9.58E-01 |
| FAM13AOS | 0.1608  | 1.89E-03 | 7.33E-03 |
| FAM13A   | -0.2406 | 2.75E-06 | 2.75E-05 |
| FAM13B   | 0.0542  | 2.98E-01 | 4.27E-01 |
| FAM13C   | -0.2908 | 1.16E-08 | 2.12E-07 |
| FAM149A  | -0.2414 | 2.56E-06 | 2.57E-05 |
| FAM149B1 | -0.0624 | 2.31E-01 | 3.53E-01 |
| FAM150A  | 0.1182  | 2.27E-02 | 5.70E-02 |
| FAM150B  | -0.0233 | 6.55E-01 | 7.57E-01 |
| FAM151A  | -0.1298 | 1.23E-02 | 3.47E-02 |
| FAM151B  | -0.1388 | 7.41E-03 | 2.28E-02 |
| FAM153A  | 0.1955  | 1.50E-04 | 8.65E-04 |
| FAM153B  | 0.1696  | 1.04E-03 | 4.44E-03 |
| FAM153C  | 0.2021  | 8.85E-05 | 5.50E-04 |
| FAM154A  | -0.1004 | 5.33E-02 | 1.13E-01 |
| FAM154B  | 0.0480  | 3.57E-01 | 4.89E-01 |
| FAM155A  | -0.1023 | 4.89E-02 | 1.06E-01 |
| FAM155B  | 0.1663  | 1.30E-03 | 5.38E-03 |
| FAM156A  | 0.3321  | 5.29E-11 | 1.66E-09 |
| FAM157A  | 0.1926  | 1.90E-04 | 1.05E-03 |
| FAM157B  | 0.0141  | 7.86E-01 | 8.58E-01 |
| FAM158A  | -0.0020 | 9.70E-01 | 9.81E-01 |
| FAM159A  | 0.1986  | 1.18E-04 | 7.00E-04 |
| FAM160A1 | 0.0798  | 1.25E-01 | 2.21E-01 |
| FAM160A2 | 0.1165  | 2.48E-02 | 6.11E-02 |
| FAM160B1 | -0.1776 | 5.87E-04 | 2.72E-03 |
| FAM160B2 | 0.1004  | 5.33E-02 | 1.13E-01 |
| FAM161A  | 0.1737  | 7.78E-04 | 3.47E-03 |
| FAM161B  | 0.0043  | 9.35E-01 | 9.59E-01 |
| FAM162A  | -0.1888 | 2.56E-04 | 1.36E-03 |
| FAM162B  | -0.0175 | 7.37E-01 | 8.22E-01 |
| FAM163A  | 0.1508  | 3.59E-03 | 1.26E-02 |
| FAM163B  | -0.1708 | 9.59E-04 | 4.15E-03 |
| FAM164A  | 0.1146  | 2.73E-02 | 6.62E-02 |
| FAM164C  | -0.1786 | 5.47E-04 | 2.57E-03 |
| FAM165B  | 0.0948  | 6.82E-02 | 1.37E-01 |
| FAM166A  | 0.2436  | 2.05E-06 | 2.13E-05 |
| FAM166B  | 0.0358  | 4.92E-01 | 6.19E-01 |
| FAM167A  | -0.0113 | 8.29E-01 | 8.88E-01 |
| FAM167B  | -0.2426 | 2.27E-06 | 2.33E-05 |
| FAM168A  | -0.0430 | 4.09E-01 | 5.42E-01 |
| FAM168B  | 0.1831  | 3.92E-04 | 1.95E-03 |

|          |         |          |          |
|----------|---------|----------|----------|
| FAM169A  | -0.0551 | 2.89E-01 | 4.18E-01 |
| FAM169B  | -0.1029 | 4.77E-02 | 1.04E-01 |
| FAM170A  | 0.0369  | 4.79E-01 | 6.08E-01 |
| FAM170B  | 0.0090  | 8.63E-01 | 9.11E-01 |
| FAM171A1 | -0.0119 | 8.20E-01 | 8.82E-01 |
| FAM171A2 | 0.0989  | 5.70E-02 | 1.19E-01 |
| FAM171B  | 0.0415  | 4.25E-01 | 5.58E-01 |
| FAM172A  | 0.1165  | 2.49E-02 | 6.12E-02 |
| FAM173A  | -0.1527 | 3.19E-03 | 1.14E-02 |
| FAM173B  | -0.0960 | 6.47E-02 | 1.32E-01 |
| FAM174A  | -0.1827 | 4.06E-04 | 2.00E-03 |
| FAM174B  | -0.1144 | 2.76E-02 | 6.67E-02 |
| FAM175A  | 0.0936  | 7.17E-02 | 1.43E-01 |
| FAM175B  | -0.0078 | 8.81E-01 | 9.24E-01 |
| FAM176A  | -0.2669 | 1.81E-07 | 2.48E-06 |
| FAM176B  | 0.0915  | 7.84E-02 | 1.53E-01 |
| FAM177A1 | -0.1373 | 8.10E-03 | 2.46E-02 |
| FAM177B  | 0.0058  | 9.11E-01 | 9.44E-01 |
| FAM178A  | 0.1515  | 3.45E-03 | 1.21E-02 |
| FAM178B  | 0.0727  | 1.62E-01 | 2.69E-01 |
| FAM179A  | -0.0388 | 4.57E-01 | 5.87E-01 |
| FAM179B  | -0.0264 | 6.12E-01 | 7.23E-01 |
| FAM180A  | -0.2087 | 5.10E-05 | 3.44E-04 |
| FAM180B  | -0.0158 | 7.61E-01 | 8.39E-01 |
| FAM181A  | 0.0370  | 4.78E-01 | 6.06E-01 |
| FAM181B  | 0.0132  | 7.99E-01 | 8.67E-01 |
| FAM182A  | 0.0811  | 1.19E-01 | 2.13E-01 |
| FAM182B  | 0.1793  | 5.21E-04 | 2.47E-03 |
| FAM183A  | 0.1668  | 1.26E-03 | 5.23E-03 |
| FAM183B  | 0.0433  | 4.06E-01 | 5.39E-01 |
| FAM184A  | 0.0264  | 6.13E-01 | 7.23E-01 |
| FAM184B  | 0.0850  | 1.02E-01 | 1.89E-01 |
| FAM185A  | -0.2248 | 1.23E-05 | 1.01E-04 |
| FAM186A  | 0.2988  | 4.35E-09 | 8.83E-08 |
| FAM186B  | -0.2693 | 1.38E-07 | 1.95E-06 |
| FAM187B  | -0.0169 | 7.46E-01 | 8.28E-01 |
| FAM188A  | -0.1349 | 9.27E-03 | 2.75E-02 |
| FAM188B  | 0.1899  | 2.35E-04 | 1.26E-03 |
| FAM189A1 | 0.0263  | 6.13E-01 | 7.24E-01 |
| FAM189A2 | -0.0312 | 5.49E-01 | 6.70E-01 |
| FAM189B  | 0.4295  | 4.34E-18 | 6.31E-16 |
| FAM18A   | 0.1028  | 4.80E-02 | 1.04E-01 |
| FAM18B2  | -0.0083 | 8.74E-01 | 9.18E-01 |
| FAM18B   | -0.0984 | 5.83E-02 | 1.21E-01 |

|          |         |          |          |
|----------|---------|----------|----------|
| FAM190A  | -0.0084 | 8.72E-01 | 9.18E-01 |
| FAM190B  | -0.1983 | 1.20E-04 | 7.14E-04 |
| FAM192A  | -0.0273 | 6.00E-01 | 7.13E-01 |
| FAM193A  | 0.2132  | 3.46E-05 | 2.48E-04 |
| FAM193B  | 0.2326  | 5.99E-06 | 5.41E-05 |
| FAM194A  | 0.0129  | 8.05E-01 | 8.71E-01 |
| FAM195A  | -0.0630 | 2.26E-01 | 3.48E-01 |
| FAM195B  | 0.1192  | 2.16E-02 | 5.47E-02 |
| FAM196A  | 0.0458  | 3.79E-01 | 5.12E-01 |
| FAM196B  | -0.1097 | 3.46E-02 | 8.03E-02 |
| FAM197Y2 | -0.0227 | 6.63E-01 | 7.64E-01 |
| FAM198A  | -0.0860 | 9.82E-02 | 1.83E-01 |
| FAM198B  | -0.2172 | 2.45E-05 | 1.84E-04 |
| FAM199X  | 0.0880  | 9.07E-02 | 1.72E-01 |
| FAM19A1  | -0.2444 | 1.89E-06 | 1.99E-05 |
| FAM19A2  | -0.0393 | 4.51E-01 | 5.82E-01 |
| FAM19A3  | 0.0922  | 7.62E-02 | 1.50E-01 |
| FAM19A4  | -0.0893 | 8.59E-02 | 1.65E-01 |
| FAM19A5  | 0.0760  | 1.44E-01 | 2.46E-01 |
| FAM200A  | 0.1359  | 8.76E-03 | 2.62E-02 |
| FAM200B  | 0.0999  | 5.46E-02 | 1.15E-01 |
| FAM20A   | -0.0225 | 6.66E-01 | 7.66E-01 |
| FAM20B   | 0.3565  | 1.47E-12 | 6.34E-11 |
| FAM20C   | -0.1458 | 4.89E-03 | 1.62E-02 |
| FAM21A   | 0.0268  | 6.06E-01 | 7.19E-01 |
| FAM21B   | 0.1244  | 1.65E-02 | 4.39E-02 |
| FAM21C   | 0.1542  | 2.89E-03 | 1.05E-02 |
| FAM22A   | -0.0519 | 3.19E-01 | 4.49E-01 |
| FAM22D   | -0.0751 | 1.49E-01 | 2.53E-01 |
| FAM22F   | -0.0927 | 7.45E-02 | 1.47E-01 |
| FAM22G   | 0.1808  | 4.65E-04 | 2.24E-03 |
| FAM23A   | -0.0898 | 8.40E-02 | 1.62E-01 |
| FAM24A   | -0.0256 | 6.23E-01 | 7.32E-01 |
| FAM24B   | 0.2636  | 2.59E-07 | 3.43E-06 |
| FAM25A   | 0.0124  | 8.11E-01 | 8.76E-01 |
| FAM25B   | 0.0195  | 7.09E-01 | 8.01E-01 |
| FAM26D   | -0.0015 | 9.78E-01 | 9.86E-01 |
| FAM26E   | -0.1233 | 1.75E-02 | 4.61E-02 |
| FAM26F   | 0.0205  | 6.94E-01 | 7.89E-01 |
| FAM27A   | 0.1275  | 1.40E-02 | 3.85E-02 |
| FAM27B   | -0.0267 | 6.08E-01 | 7.20E-01 |
| FAM27C   | 0.1211  | 1.96E-02 | 5.06E-02 |
| FAM27L   | 0.0583  | 2.63E-01 | 3.89E-01 |
| FAM32A   | -0.0930 | 7.36E-02 | 1.46E-01 |



|         |         |          |          |
|---------|---------|----------|----------|
| FAM35A  | -0.0776 | 1.36E-01 | 2.35E-01 |
| FAM35B2 | -0.1284 | 1.33E-02 | 3.71E-02 |
| FAM35B  | -0.0984 | 5.83E-02 | 1.21E-01 |
| FAM36A  | 0.1348  | 9.36E-03 | 2.77E-02 |
| FAM38A  | -0.1814 | 4.46E-04 | 2.16E-03 |
| FAM38B  | 0.0443  | 3.95E-01 | 5.27E-01 |
| FAM3A   | 0.0119  | 8.19E-01 | 8.81E-01 |
| FAM3B   | 0.1134  | 2.89E-02 | 6.94E-02 |
| FAM3C   | -0.1685 | 1.12E-03 | 4.75E-03 |
| FAM3D   | 0.0215  | 6.79E-01 | 7.77E-01 |
| FAM40A  | 0.0427  | 4.12E-01 | 5.45E-01 |
| FAM40B  | 0.1408  | 6.61E-03 | 2.08E-02 |
| FAM41C  | 0.1589  | 2.14E-03 | 8.15E-03 |
| FAM43A  | -0.1181 | 2.29E-02 | 5.72E-02 |
| FAM43B  | -0.0742 | 1.54E-01 | 2.58E-01 |
| FAM45A  | 0.0366  | 4.82E-01 | 6.10E-01 |
| FAM45B  | -0.0398 | 4.45E-01 | 5.77E-01 |
| FAM46A  | -0.0583 | 2.63E-01 | 3.90E-01 |
| FAM46B  | 0.1007  | 5.26E-02 | 1.12E-01 |
| FAM46C  | -0.0436 | 4.02E-01 | 5.35E-01 |
| FAM46D  | 0.1300  | 1.22E-02 | 3.44E-02 |
| FAM47A  | 0.0779  | 1.34E-01 | 2.33E-01 |
| FAM47B  | 0.0560  | 2.82E-01 | 4.11E-01 |
| FAM47C  | -0.0019 | 9.70E-01 | 9.81E-01 |
| FAM47E  | -0.0340 | 5.14E-01 | 6.39E-01 |
| FAM48A  | 0.2265  | 1.06E-05 | 8.83E-05 |
| FAM48B1 | -0.0809 | 1.20E-01 | 2.14E-01 |
| FAM48B2 | -0.0819 | 1.15E-01 | 2.08E-01 |
| FAM49A  | -0.0414 | 4.27E-01 | 5.59E-01 |
| FAM49B  | 0.1852  | 3.36E-04 | 1.72E-03 |
| FAM50A  | 0.2242  | 1.30E-05 | 1.06E-04 |
| FAM50B  | -0.0027 | 9.58E-01 | 9.74E-01 |
| FAM53A  | 0.0533  | 3.06E-01 | 4.35E-01 |
| FAM53B  | 0.1135  | 2.89E-02 | 6.93E-02 |
| FAM53C  | 0.0886  | 8.85E-02 | 1.69E-01 |
| FAM54A  | 0.4432  | 2.81E-19 | 5.83E-17 |
| FAM54B  | -0.1765 | 6.40E-04 | 2.93E-03 |
| FAM55A  | 0.0520  | 3.18E-01 | 4.48E-01 |
| FAM55B  | -0.0340 | 5.14E-01 | 6.38E-01 |
| FAM55C  | 0.0761  | 1.43E-01 | 2.45E-01 |
| FAM55D  | 0.0324  | 5.34E-01 | 6.56E-01 |
| FAM57A  | 0.1810  | 4.58E-04 | 2.21E-03 |
| FAM57B  | 0.2352  | 4.67E-06 | 4.38E-05 |
| FAM58A  | 0.0750  | 1.49E-01 | 2.53E-01 |

|         |         |          |          |
|---------|---------|----------|----------|
| FAM58B  | 0.0572  | 2.72E-01 | 3.99E-01 |
| FAM59A  | -0.0478 | 3.59E-01 | 4.91E-01 |
| FAM5B   | -0.0717 | 1.68E-01 | 2.77E-01 |
| FAM5C   | -0.0156 | 7.64E-01 | 8.41E-01 |
| FAM60A  | 0.1366  | 8.44E-03 | 2.54E-02 |
| FAM63A  | 0.0449  | 3.89E-01 | 5.22E-01 |
| FAM63B  | -0.0385 | 4.59E-01 | 5.90E-01 |
| FAM64A  | 0.3359  | 3.11E-11 | 1.02E-09 |
| FAM65A  | -0.0877 | 9.16E-02 | 1.73E-01 |
| FAM65B  | -0.1210 | 1.97E-02 | 5.07E-02 |
| FAM65C  | -0.1034 | 4.65E-02 | 1.02E-01 |
| FAM66A  | 0.0601  | 2.48E-01 | 3.73E-01 |
| FAM66C  | 0.0728  | 1.61E-01 | 2.68E-01 |
| FAM66D  | 0.0086  | 8.68E-01 | 9.15E-01 |
| FAM66E  | 0.0894  | 8.55E-02 | 1.64E-01 |
| FAM69A  | -0.0938 | 7.11E-02 | 1.42E-01 |
| FAM69B  | 0.0565  | 2.78E-01 | 4.07E-01 |
| FAM69C  | 0.0571  | 2.73E-01 | 4.01E-01 |
| FAM70A  | 0.0367  | 4.81E-01 | 6.10E-01 |
| FAM70B  | -0.1218 | 1.89E-02 | 4.91E-02 |
| FAM71A  | 0.0485  | 3.51E-01 | 4.83E-01 |
| FAM71C  | 0.0599  | 2.50E-01 | 3.75E-01 |
| FAM71D  | 0.4551  | 2.31E-20 | 6.22E-18 |
| FAM71E1 | -0.0483 | 3.54E-01 | 4.86E-01 |
| FAM71E2 | 0.1048  | 4.37E-02 | 9.67E-02 |
| FAM71F1 | -0.0290 | 5.78E-01 | 6.95E-01 |
| FAM71F2 | -0.0461 | 3.76E-01 | 5.09E-01 |
| FAM72A  | 0.4028  | 6.58E-16 | 5.63E-14 |
| FAM72B  | 0.4779  | 1.44E-22 | 5.41E-20 |
| FAM72D  | 0.4913  | 6.17E-24 | 2.93E-21 |
| FAM73A  | -0.0685 | 1.88E-01 | 3.02E-01 |
| FAM73B  | 0.1455  | 4.98E-03 | 1.64E-02 |
| FAM74A1 | -0.0082 | 8.75E-01 | 9.19E-01 |
| FAM74A3 | 0.0069  | 8.95E-01 | 9.33E-01 |
| FAM74A4 | 0.0136  | 7.94E-01 | 8.63E-01 |
| FAM75A2 | 0.0825  | 1.12E-01 | 2.04E-01 |
| FAM75A3 | 0.1003  | 5.36E-02 | 1.14E-01 |
| FAM75A5 | 0.0186  | 7.21E-01 | 8.10E-01 |
| FAM75A6 | 0.0067  | 8.97E-01 | 9.35E-01 |
| FAM75C1 | 0.0634  | 2.23E-01 | 3.44E-01 |
| FAM76A  | 0.0122  | 8.16E-01 | 8.79E-01 |
| FAM76B  | 0.1699  | 1.02E-03 | 4.37E-03 |
| FAM78A  | -0.0380 | 4.65E-01 | 5.95E-01 |
| FAM78B  | -0.0538 | 3.01E-01 | 4.30E-01 |

|         |         |          |          |
|---------|---------|----------|----------|
| FAM7A2  | 0.1245  | 1.64E-02 | 4.37E-02 |
| FAM7A3  | 0.1585  | 2.20E-03 | 8.33E-03 |
| FAM81A  | 0.2162  | 2.66E-05 | 1.98E-04 |
| FAM81B  | 0.0352  | 4.99E-01 | 6.25E-01 |
| FAM82A1 | -0.2421 | 2.39E-06 | 2.43E-05 |
| FAM82A2 | -0.2423 | 2.34E-06 | 2.39E-05 |
| FAM82B  | -0.1950 | 1.57E-04 | 8.96E-04 |
| FAM83A  | 0.0006  | 9.91E-01 | 9.95E-01 |
| FAM83B  | 0.0829  | 1.11E-01 | 2.02E-01 |
| FAM83C  | 0.0227  | 6.63E-01 | 7.64E-01 |
| FAM83D  | 0.2457  | 1.67E-06 | 1.78E-05 |
| FAM83E  | 0.0763  | 1.43E-01 | 2.44E-01 |
| FAM83F  | 0.0768  | 1.40E-01 | 2.40E-01 |
| FAM83G  | 0.0522  | 3.16E-01 | 4.46E-01 |
| FAM83H  | 0.0879  | 9.10E-02 | 1.72E-01 |
| FAM84A  | -0.0173 | 7.40E-01 | 8.25E-01 |
| FAM84B  | -0.1334 | 1.01E-02 | 2.95E-02 |
| FAM86A  | 0.0390  | 4.54E-01 | 5.85E-01 |
| FAM86B1 | 0.0382  | 4.64E-01 | 5.94E-01 |
| FAM86B2 | 0.0433  | 4.06E-01 | 5.39E-01 |
| FAM86C  | 0.0214  | 6.81E-01 | 7.79E-01 |
| FAM86D  | 0.0579  | 2.66E-01 | 3.93E-01 |
| FAM89A  | 0.0694  | 1.82E-01 | 2.95E-01 |
| FAM89B  | 0.0270  | 6.05E-01 | 7.17E-01 |
| FAM8A1  | -0.1475 | 4.42E-03 | 1.49E-02 |
| FAM90A1 | 0.1372  | 8.13E-03 | 2.47E-02 |
| FAM90A7 | 0.0567  | 2.76E-01 | 4.04E-01 |
| FAM91A1 | -0.0251 | 6.30E-01 | 7.38E-01 |
| FAM92A1 | -0.0177 | 7.34E-01 | 8.20E-01 |
| FAM92A3 | 0.0746  | 1.51E-01 | 2.56E-01 |
| FAM92B  | -0.0101 | 8.46E-01 | 8.99E-01 |
| FAM95B1 | 0.0635  | 2.22E-01 | 3.43E-01 |
| FAM96A  | -0.1476 | 4.39E-03 | 1.48E-02 |
| FAM96B  | -0.1116 | 3.16E-02 | 7.45E-02 |
| FAM98A  | -0.2272 | 9.94E-06 | 8.37E-05 |
| FAM98B  | 0.0986  | 5.77E-02 | 1.20E-01 |
| FAM98C  | 0.0047  | 9.29E-01 | 9.55E-01 |
| FAM99A  | -0.0960 | 6.48E-02 | 1.32E-01 |
| FAM99B  | -0.0766 | 1.41E-01 | 2.42E-01 |
| FAM9A   | 0.0143  | 7.84E-01 | 8.56E-01 |
| FAM9B   | -0.2056 | 6.62E-05 | 4.29E-04 |
| FAM9C   | 0.0927  | 7.44E-02 | 1.47E-01 |
| FANCA   | 0.2265  | 1.06E-05 | 8.82E-05 |
| FANCB   | 0.3831  | 2.06E-14 | 1.26E-12 |

|         |         |          |          |
|---------|---------|----------|----------|
| FANCC   | 0.0685  | 1.88E-01 | 3.01E-01 |
| FANCD2  | 0.4052  | 4.31E-16 | 3.78E-14 |
| FANCE   | 0.4274  | 6.63E-18 | 9.24E-16 |
| FANCF   | 0.1855  | 3.29E-04 | 1.69E-03 |
| FANCG   | 0.4321  | 2.60E-18 | 4.07E-16 |
| FANCI   | 0.4330  | 2.19E-18 | 3.49E-16 |
| FANCL   | 0.2800  | 4.12E-08 | 6.56E-07 |
| FANCM   | 0.1940  | 1.70E-04 | 9.58E-04 |
| FANK1   | 0.0804  | 1.22E-01 | 2.17E-01 |
| FAP     | 0.0052  | 9.20E-01 | 9.49E-01 |
| FAR1    | -0.0304 | 5.59E-01 | 6.77E-01 |
| FAR2    | 0.0117  | 8.22E-01 | 8.83E-01 |
| FARP1   | 0.0850  | 1.02E-01 | 1.88E-01 |
| FARP2   | -0.2782 | 5.08E-08 | 7.91E-07 |
| FARS2   | -0.1060 | 4.13E-02 | 9.24E-02 |
| FARSA   | -0.0093 | 8.58E-01 | 9.09E-01 |
| FARSB   | 0.2370  | 3.93E-06 | 3.78E-05 |
| FASLG   | -0.0460 | 3.77E-01 | 5.11E-01 |
| FASN    | 0.0393  | 4.51E-01 | 5.82E-01 |
| FASTKD1 | 0.0258  | 6.20E-01 | 7.29E-01 |
| FASTKD2 | -0.0200 | 7.01E-01 | 7.94E-01 |
| FASTKD3 | 0.1896  | 2.40E-04 | 1.29E-03 |
| FASTKD5 | -0.0420 | 4.19E-01 | 5.52E-01 |
| FASTK   | -0.0597 | 2.51E-01 | 3.76E-01 |
| FAS     | -0.2624 | 2.93E-07 | 3.82E-06 |
| FAT1    | -0.1376 | 7.94E-03 | 2.42E-02 |
| FAT2    | 0.0830  | 1.11E-01 | 2.01E-01 |
| FAT3    | 0.0981  | 5.89E-02 | 1.22E-01 |
| FAT4    | -0.2955 | 6.53E-09 | 1.27E-07 |
| FATE1   | 0.1018  | 5.01E-02 | 1.08E-01 |
| FAU     | 0.0005  | 9.92E-01 | 9.95E-01 |
| FBF1    | 0.3242  | 1.58E-10 | 4.48E-09 |
| FBLIM1  | 0.0893  | 8.60E-02 | 1.65E-01 |
| FBLL1   | 0.1539  | 2.96E-03 | 1.07E-02 |
| FBLN1   | 0.1604  | 1.94E-03 | 7.52E-03 |
| FBLN2   | -0.2022 | 8.81E-05 | 5.48E-04 |
| FBLN5   | -0.2495 | 1.14E-06 | 1.27E-05 |
| FBLN7   | -0.0580 | 2.65E-01 | 3.92E-01 |
| FBL     | 0.2183  | 2.22E-05 | 1.69E-04 |
| FBN1    | -0.1390 | 7.33E-03 | 2.26E-02 |
| FBN2    | 0.0706  | 1.75E-01 | 2.85E-01 |
| FBN3    | 0.0332  | 5.23E-01 | 6.47E-01 |
| FBP1    | -0.2252 | 1.19E-05 | 9.80E-05 |
| FBP2    | 0.1457  | 4.94E-03 | 1.63E-02 |

|          |         |          |          |
|----------|---------|----------|----------|
| FBRSL1   | 0.1684  | 1.13E-03 | 4.76E-03 |
| FBRS     | 0.1645  | 1.48E-03 | 5.96E-03 |
| FBXL12   | 0.0628  | 2.27E-01 | 3.49E-01 |
| FBXL13   | -0.0172 | 7.41E-01 | 8.25E-01 |
| FBXL14   | -0.0315 | 5.45E-01 | 6.66E-01 |
| FBXL15   | -0.1338 | 9.90E-03 | 2.90E-02 |
| FBXL16   | 0.0136  | 7.93E-01 | 8.63E-01 |
| FBXL17   | -0.1829 | 3.97E-04 | 1.97E-03 |
| FBXL18   | 0.2577  | 4.85E-07 | 5.96E-06 |
| FBXL19   | 0.1543  | 2.88E-03 | 1.04E-02 |
| FBXL20   | 0.1256  | 1.55E-02 | 4.17E-02 |
| FBXL21   | 0.1061  | 4.12E-02 | 9.23E-02 |
| FBXL22   | 0.0122  | 8.15E-01 | 8.78E-01 |
| FBXL2    | 0.1427  | 5.89E-03 | 1.88E-02 |
| FBXL3    | -0.0907 | 8.10E-02 | 1.57E-01 |
| FBXL4    | 0.0475  | 3.62E-01 | 4.94E-01 |
| FBXL5    | -0.1926 | 1.90E-04 | 1.05E-03 |
| FBXL6    | 0.0684  | 1.89E-01 | 3.02E-01 |
| FBXL7    | 0.0540  | 3.00E-01 | 4.29E-01 |
| FBXL8    | -0.1660 | 1.33E-03 | 5.47E-03 |
| FBXO10   | 0.1196  | 2.12E-02 | 5.37E-02 |
| FBXO11   | 0.0697  | 1.80E-01 | 2.92E-01 |
| FBXO15   | 0.0160  | 7.58E-01 | 8.38E-01 |
| FBXO16   | 0.1163  | 2.51E-02 | 6.17E-02 |
| FBXO17   | -0.0116 | 8.24E-01 | 8.85E-01 |
| FBXO18   | 0.0930  | 7.35E-02 | 1.46E-01 |
| FBXO21   | 0.0567  | 2.76E-01 | 4.04E-01 |
| FBXO22OS | 0.0227  | 6.64E-01 | 7.64E-01 |
| FBXO22   | -0.0873 | 9.31E-02 | 1.76E-01 |
| FBXO24   | 0.0279  | 5.92E-01 | 7.07E-01 |
| FBXO25   | -0.0989 | 5.70E-02 | 1.19E-01 |
| FBXO27   | -0.0414 | 4.26E-01 | 5.59E-01 |
| FBXO28   | 0.0342  | 5.12E-01 | 6.36E-01 |
| FBXO2    | -0.1102 | 3.39E-02 | 7.90E-02 |
| FBXO30   | 0.1981  | 1.23E-04 | 7.26E-04 |
| FBXO31   | -0.2601 | 3.78E-07 | 4.78E-06 |
| FBXO32   | -0.0918 | 7.73E-02 | 1.52E-01 |
| FBXO33   | -0.2309 | 7.00E-06 | 6.18E-05 |
| FBXO34   | 0.0555  | 2.86E-01 | 4.15E-01 |
| FBXO36   | -0.1608 | 1.88E-03 | 7.33E-03 |
| FBXO38   | -0.0684 | 1.89E-01 | 3.02E-01 |
| FBXO39   | -0.0773 | 1.37E-01 | 2.37E-01 |
| FBXO3    | -0.1703 | 9.90E-04 | 4.26E-03 |
| FBXO40   | -0.0964 | 6.37E-02 | 1.30E-01 |

|        |         |          |          |
|--------|---------|----------|----------|
| FBXO41 | 0.1715  | 9.14E-04 | 3.98E-03 |
| FBXO42 | -0.0152 | 7.70E-01 | 8.45E-01 |
| FBXO43 | 0.4184  | 3.72E-17 | 4.14E-15 |
| FBXO44 | 0.0016  | 9.75E-01 | 9.85E-01 |
| FBXO45 | 0.2846  | 2.43E-08 | 4.09E-07 |
| FBXO46 | 0.3425  | 1.20E-11 | 4.17E-10 |
| FBXO47 | 0.1619  | 1.75E-03 | 6.89E-03 |
| FBXO48 | 0.1063  | 4.08E-02 | 9.15E-02 |
| FBXO4  | 0.1926  | 1.89E-04 | 1.05E-03 |
| FBXO5  | 0.3624  | 5.86E-13 | 2.73E-11 |
| FBXO6  | -0.0257 | 6.22E-01 | 7.31E-01 |
| FBXO7  | -0.1925 | 1.91E-04 | 1.06E-03 |
| FBXO8  | -0.3854 | 1.38E-14 | 8.71E-13 |
| FBXO9  | 0.1337  | 9.95E-03 | 2.91E-02 |
| FBXW10 | 0.0113  | 8.28E-01 | 8.88E-01 |
| FBXW11 | -0.0395 | 4.48E-01 | 5.80E-01 |
| FBXW12 | 0.0288  | 5.80E-01 | 6.96E-01 |
| FBXW2  | 0.1593  | 2.08E-03 | 7.98E-03 |
| FBXW4  | -0.0417 | 4.23E-01 | 5.56E-01 |
| FBXW5  | -0.0629 | 2.27E-01 | 3.48E-01 |
| FBXW7  | -0.1159 | 2.57E-02 | 6.29E-02 |
| FBXW8  | 0.0308  | 5.55E-01 | 6.74E-01 |
| FBXW9  | 0.0668  | 1.99E-01 | 3.15E-01 |
| FCAMR  | -0.1570 | 2.43E-03 | 9.04E-03 |
| FCAR   | -0.1320 | 1.09E-02 | 3.13E-02 |
| FCER1A | -0.0311 | 5.50E-01 | 6.70E-01 |
| FCER1G | -0.0165 | 7.51E-01 | 8.32E-01 |
| FCER2  | 0.0252  | 6.29E-01 | 7.37E-01 |
| FCF1   | -0.0728 | 1.62E-01 | 2.69E-01 |
| FCGBP  | 0.1073  | 3.88E-02 | 8.80E-02 |
| FCGR1A | 0.0124  | 8.12E-01 | 8.76E-01 |
| FCGR1B | 0.0319  | 5.40E-01 | 6.61E-01 |
| FCGR1C | 0.0093  | 8.59E-01 | 9.09E-01 |
| FCGR2A | 0.0275  | 5.98E-01 | 7.11E-01 |
| FCGR2B | -0.0833 | 1.09E-01 | 1.99E-01 |
| FCGR2C | -0.0485 | 3.51E-01 | 4.83E-01 |
| FCGR3A | -0.0278 | 5.93E-01 | 7.08E-01 |
| FCGR3B | -0.0021 | 9.68E-01 | 9.80E-01 |
| FCGRT  | -0.2991 | 4.19E-09 | 8.57E-08 |
| FCHO1  | 0.1597  | 2.04E-03 | 7.83E-03 |
| FCHO2  | -0.0934 | 7.22E-02 | 1.44E-01 |
| FCHSD1 | 0.0480  | 3.56E-01 | 4.88E-01 |
| FCHSD2 | -0.0200 | 7.00E-01 | 7.94E-01 |
| FCN1   | -0.1311 | 1.15E-02 | 3.27E-02 |

|         |         |          |          |
|---------|---------|----------|----------|
| FCN2    | -0.1530 | 3.12E-03 | 1.12E-02 |
| FCN3    | -0.2335 | 5.46E-06 | 4.99E-05 |
| FCRL1   | 0.0560  | 2.82E-01 | 4.11E-01 |
| FCRL2   | 0.0612  | 2.40E-01 | 3.64E-01 |
| FCRL3   | 0.0268  | 6.07E-01 | 7.19E-01 |
| FCRL4   | 0.0598  | 2.51E-01 | 3.76E-01 |
| FCRL5   | 0.0037  | 9.44E-01 | 9.65E-01 |
| FCRL6   | -0.1459 | 4.87E-03 | 1.61E-02 |
| FCRLA   | 0.0545  | 2.95E-01 | 4.24E-01 |
| FCRLB   | -0.0658 | 2.06E-01 | 3.24E-01 |
| FDFT1   | -0.0152 | 7.70E-01 | 8.45E-01 |
| FDPSL2A | 0.2311  | 6.89E-06 | 6.10E-05 |
| FDPS    | 0.2046  | 7.21E-05 | 4.62E-04 |
| FDX1L   | -0.0566 | 2.77E-01 | 4.05E-01 |
| FDX1    | -0.3401 | 1.69E-11 | 5.81E-10 |
| FDXACB1 | 0.0144  | 7.83E-01 | 8.55E-01 |
| FDXR    | -0.0983 | 5.84E-02 | 1.21E-01 |
| FECH    | -0.1591 | 2.12E-03 | 8.09E-03 |
| FEM1A   | -0.1268 | 1.45E-02 | 3.96E-02 |
| FEM1B   | -0.0725 | 1.64E-01 | 2.71E-01 |
| FEM1C   | -0.1576 | 2.33E-03 | 8.75E-03 |
| FEN1    | 0.4143  | 8.07E-17 | 8.33E-15 |
| FER1L4  | 0.2196  | 1.97E-05 | 1.53E-04 |
| FER1L5  | 0.1992  | 1.12E-04 | 6.69E-04 |
| FER1L6  | 0.1375  | 8.00E-03 | 2.43E-02 |
| FERMT1  | 0.1240  | 1.68E-02 | 4.46E-02 |
| FERMT2  | -0.1556 | 2.65E-03 | 9.74E-03 |
| FERMT3  | -0.0192 | 7.13E-01 | 8.04E-01 |
| FER     | 0.0931  | 7.34E-02 | 1.46E-01 |
| FES     | 0.0991  | 5.66E-02 | 1.18E-01 |
| FETUB   | -0.1553 | 2.71E-03 | 9.91E-03 |
| FEV     | 0.0808  | 1.20E-01 | 2.15E-01 |
| FEZ1    | 0.0209  | 6.89E-01 | 7.85E-01 |
| FEZ2    | -0.0305 | 5.59E-01 | 6.77E-01 |
| FEZF1   | 0.0757  | 1.46E-01 | 2.48E-01 |
| FEZF2   | 0.0752  | 1.48E-01 | 2.52E-01 |
| FFAR1   | 0.0897  | 8.44E-02 | 1.62E-01 |
| FFAR2   | 0.0783  | 1.32E-01 | 2.30E-01 |
| FFAR3   | 0.0020  | 9.69E-01 | 9.81E-01 |
| FGA     | -0.2020 | 8.95E-05 | 5.56E-04 |
| FGB     | -0.1389 | 7.36E-03 | 2.27E-02 |
| FGD1    | 0.2265  | 1.05E-05 | 8.82E-05 |
| FGD2    | -0.0645 | 2.15E-01 | 3.35E-01 |
| FGD3    | 0.0642  | 2.17E-01 | 3.37E-01 |

|          |         |          |          |
|----------|---------|----------|----------|
| FGD4     | -0.1408 | 6.60E-03 | 2.08E-02 |
| FGD5     | -0.2337 | 5.38E-06 | 4.93E-05 |
| FGD6     | 0.1332  | 1.02E-02 | 2.97E-02 |
| FGF10    | 0.0632  | 2.24E-01 | 3.46E-01 |
| FGF11    | 0.0392  | 4.52E-01 | 5.83E-01 |
| FGF12    | -0.0582 | 2.63E-01 | 3.90E-01 |
| FGF13    | 0.0416  | 4.24E-01 | 5.56E-01 |
| FGF14    | -0.1157 | 2.58E-02 | 6.32E-02 |
| FGF16    | -0.0287 | 5.81E-01 | 6.98E-01 |
| FGF17    | 0.0951  | 6.73E-02 | 1.36E-01 |
| FGF18    | -0.1287 | 1.31E-02 | 3.65E-02 |
| FGF19    | -0.0354 | 4.96E-01 | 6.22E-01 |
| FGF1     | -0.1678 | 1.18E-03 | 4.94E-03 |
| FGF20    | 0.0062  | 9.06E-01 | 9.41E-01 |
| FGF21    | 0.0129  | 8.04E-01 | 8.70E-01 |
| FGF22    | -0.0124 | 8.12E-01 | 8.76E-01 |
| FGF23    | -0.0115 | 8.25E-01 | 8.85E-01 |
| FGF2     | -0.0610 | 2.42E-01 | 3.66E-01 |
| FGF3     | 0.0466  | 3.71E-01 | 5.04E-01 |
| FGF4     | 0.0747  | 1.51E-01 | 2.55E-01 |
| FGF5     | 0.1189  | 2.20E-02 | 5.54E-02 |
| FGF7     | -0.1893 | 2.46E-04 | 1.31E-03 |
| FGF8     | 0.0162  | 7.56E-01 | 8.37E-01 |
| FGF9     | 0.0483  | 3.53E-01 | 4.85E-01 |
| FGFBP1   | 0.0182  | 7.27E-01 | 8.14E-01 |
| FGFBP2   | -0.1851 | 3.38E-04 | 1.73E-03 |
| FGFBP3   | -0.0335 | 5.20E-01 | 6.44E-01 |
| FGFR10P2 | 0.0664  | 2.02E-01 | 3.19E-01 |
| FGFR10P  | 0.0598  | 2.51E-01 | 3.76E-01 |
| FGFR1    | -0.0042 | 9.36E-01 | 9.60E-01 |
| FGFR2    | 0.0638  | 2.20E-01 | 3.41E-01 |
| FGFR3    | 0.2323  | 6.14E-06 | 5.52E-05 |
| FGFR4    | 0.1544  | 2.86E-03 | 1.04E-02 |
| FGFRL1   | -0.1449 | 5.18E-03 | 1.70E-02 |
| FGGY     | -0.1532 | 3.09E-03 | 1.11E-02 |
| FGG      | -0.1506 | 3.65E-03 | 1.27E-02 |
| FGL1     | -0.1791 | 5.28E-04 | 2.49E-03 |
| FGL2     | -0.1496 | 3.87E-03 | 1.34E-02 |
| FGR      | -0.0855 | 1.00E-01 | 1.86E-01 |
| FHAD1    | 0.1715  | 9.09E-04 | 3.96E-03 |
| FHDC1    | 0.2006  | 9.99E-05 | 6.08E-04 |
| FHIT     | -0.0464 | 3.73E-01 | 5.06E-01 |
| FHL1     | -0.1684 | 1.13E-03 | 4.77E-03 |
| FHL2     | -0.0803 | 1.22E-01 | 2.18E-01 |



|          |         |          |          |
|----------|---------|----------|----------|
| FHL3     | 0.1740  | 7.63E-04 | 3.41E-03 |
| FHL5     | -0.1820 | 4.27E-04 | 2.08E-03 |
| FHOD1    | -0.0001 | 9.98E-01 | 9.99E-01 |
| FHOD3    | 0.2868  | 1.86E-08 | 3.24E-07 |
| FH       | -0.0934 | 7.24E-02 | 1.44E-01 |
| FIBCD1   | 0.1585  | 2.20E-03 | 8.34E-03 |
| FIBIN    | -0.1207 | 2.01E-02 | 5.15E-02 |
| FIBP     | -0.0165 | 7.51E-01 | 8.32E-01 |
| FICD     | -0.0055 | 9.16E-01 | 9.47E-01 |
| FIG4     | 0.2945  | 7.34E-09 | 1.41E-07 |
| FIGF     | -0.0237 | 6.49E-01 | 7.53E-01 |
| FIGLA    | 0.0046  | 9.29E-01 | 9.55E-01 |
| FIGNL1   | 0.2930  | 8.81E-09 | 1.66E-07 |
| FIGNL2   | 0.2155  | 2.85E-05 | 2.10E-04 |
| FIGN     | 0.0637  | 2.21E-01 | 3.42E-01 |
| FILIP1L  | -0.1197 | 2.11E-02 | 5.37E-02 |
| FILIP1   | -0.0653 | 2.09E-01 | 3.28E-01 |
| FIP1L1   | 0.2911  | 1.12E-08 | 2.05E-07 |
| FIS1     | -0.2114 | 4.05E-05 | 2.83E-04 |
| FITM1    | -0.1230 | 1.78E-02 | 4.67E-02 |
| FITM2    | -0.2410 | 2.65E-06 | 2.66E-05 |
| FIZ1     | 0.1472  | 4.51E-03 | 1.52E-02 |
| FJX1     | -0.0446 | 3.91E-01 | 5.24E-01 |
| FKBP10   | -0.0019 | 9.71E-01 | 9.81E-01 |
| FKBP11   | 0.0417  | 4.23E-01 | 5.56E-01 |
| FKBP14   | -0.0042 | 9.36E-01 | 9.60E-01 |
| FKBP15   | 0.1648  | 1.44E-03 | 5.85E-03 |
| FKBP1AP1 | 0.1662  | 1.31E-03 | 5.41E-03 |
| FKBP1A   | 0.0840  | 1.06E-01 | 1.95E-01 |
| FKBP1B   | -0.0578 | 2.67E-01 | 3.95E-01 |
| FKBP2    | -0.0937 | 7.14E-02 | 1.42E-01 |
| FKBP3    | 0.0055  | 9.16E-01 | 9.47E-01 |
| FKBP4    | 0.0320  | 5.39E-01 | 6.61E-01 |
| FKBP5    | -0.0911 | 7.98E-02 | 1.56E-01 |
| FKBP6    | 0.0874  | 9.27E-02 | 1.75E-01 |
| FKBP7    | -0.1346 | 9.43E-03 | 2.79E-02 |
| FKBP8    | -0.0015 | 9.78E-01 | 9.86E-01 |
| FKBP9L   | 0.0170  | 7.44E-01 | 8.27E-01 |
| FKBP9    | 0.0308  | 5.55E-01 | 6.74E-01 |
| FKBPL    | 0.1346  | 9.43E-03 | 2.79E-02 |
| FKRP     | -0.0023 | 9.65E-01 | 9.79E-01 |
| FKSG29   | 0.1129  | 2.97E-02 | 7.09E-02 |
| FKSG83   | 0.0337  | 5.18E-01 | 6.42E-01 |
| FKTN     | 0.2225  | 1.52E-05 | 1.21E-04 |

|          |         |          |          |
|----------|---------|----------|----------|
| FLAD1    | 0.3952  | 2.54E-15 | 1.86E-13 |
| FLCN     | 0.0807  | 1.21E-01 | 2.16E-01 |
| FLG2     | 0.0359  | 4.91E-01 | 6.18E-01 |
| FLG      | 0.0048  | 9.26E-01 | 9.53E-01 |
| FLI1     | -0.1525 | 3.22E-03 | 1.15E-02 |
| FLII     | -0.0102 | 8.45E-01 | 8.99E-01 |
| FLJ10038 | -0.0497 | 3.40E-01 | 4.71E-01 |
| FLJ10213 | 0.0646  | 2.15E-01 | 3.34E-01 |
| FLJ10357 | 0.0881  | 9.02E-02 | 1.71E-01 |
| FLJ10661 | 0.0530  | 3.08E-01 | 4.38E-01 |
| FLJ11235 | -0.1227 | 1.81E-02 | 4.74E-02 |
| FLJ12825 | 0.1534  | 3.06E-03 | 1.10E-02 |
| FLJ13197 | 0.1216  | 1.91E-02 | 4.95E-02 |
| FLJ13224 | -0.1299 | 1.23E-02 | 3.45E-02 |
| FLJ14107 | 0.0773  | 1.37E-01 | 2.37E-01 |
| FLJ16779 | 0.0675  | 1.94E-01 | 3.10E-01 |
| FLJ22536 | 0.0797  | 1.25E-01 | 2.21E-01 |
| FLJ23867 | 0.1226  | 1.81E-02 | 4.74E-02 |
| FLJ25328 | 0.1486  | 4.11E-03 | 1.41E-02 |
| FLJ25363 | 0.1405  | 6.71E-03 | 2.10E-02 |
| FLJ25758 | 0.1250  | 1.60E-02 | 4.28E-02 |
| FLJ26850 | 0.1234  | 1.74E-02 | 4.58E-02 |
| FLJ30679 | -0.1078 | 3.80E-02 | 8.66E-02 |
| FLJ32063 | 0.0012  | 9.81E-01 | 9.88E-01 |
| FLJ33360 | 0.1349  | 9.30E-03 | 2.76E-02 |
| FLJ33630 | -0.1307 | 1.18E-02 | 3.33E-02 |
| FLJ34503 | 0.0644  | 2.16E-01 | 3.36E-01 |
| FLJ35024 | 0.0773  | 1.37E-01 | 2.37E-01 |
| FLJ35220 | -0.1023 | 4.90E-02 | 1.06E-01 |
| FLJ35390 | -0.0331 | 5.25E-01 | 6.48E-01 |
| FLJ35776 | 0.0807  | 1.21E-01 | 2.15E-01 |
| FLJ36000 | 0.0859  | 9.86E-02 | 1.84E-01 |
| FLJ36031 | -0.1586 | 2.19E-03 | 8.30E-03 |
| FLJ36777 | 0.0809  | 1.20E-01 | 2.14E-01 |
| FLJ37201 | 0.1783  | 5.61E-04 | 2.62E-03 |
| FLJ37307 | -0.0201 | 7.00E-01 | 7.93E-01 |
| FLJ37453 | -0.0473 | 3.63E-01 | 4.96E-01 |
| FLJ37543 | 0.0288  | 5.80E-01 | 6.96E-01 |
| FLJ39582 | -0.0806 | 1.21E-01 | 2.16E-01 |
| FLJ39609 | -0.0901 | 8.31E-02 | 1.60E-01 |
| FLJ39653 | 0.2496  | 1.12E-06 | 1.26E-05 |
| FLJ39739 | 0.1441  | 5.43E-03 | 1.77E-02 |
| FLJ40292 | 0.2297  | 7.87E-06 | 6.80E-05 |
| FLJ40330 | 0.0917  | 7.76E-02 | 1.52E-01 |

|          |         |          |          |
|----------|---------|----------|----------|
| FLJ40504 | 0.0278  | 5.93E-01 | 7.08E-01 |
| FLJ40852 | -0.0679 | 1.92E-01 | 3.06E-01 |
| FLJ41941 | 0.0817  | 1.16E-01 | 2.09E-01 |
| FLJ42289 | -0.0598 | 2.50E-01 | 3.76E-01 |
| FLJ42393 | 0.0912  | 7.94E-02 | 1.55E-01 |
| FLJ42627 | 0.2079  | 5.48E-05 | 3.66E-04 |
| FLJ42709 | -0.1182 | 2.28E-02 | 5.71E-02 |
| FLJ42875 | 0.0610  | 2.41E-01 | 3.66E-01 |
| FLJ43390 | 0.0706  | 1.75E-01 | 2.85E-01 |
| FLJ43663 | -0.0287 | 5.82E-01 | 6.98E-01 |
| FLJ43859 | -0.0297 | 5.68E-01 | 6.86E-01 |
| FLJ43860 | 0.1235  | 1.73E-02 | 4.57E-02 |
| FLJ43950 | 0.0282  | 5.88E-01 | 7.03E-01 |
| FLJ44054 | 0.0259  | 6.20E-01 | 7.29E-01 |
| FLJ44606 | 0.1643  | 1.49E-03 | 6.02E-03 |
| FLJ44635 | -0.0319 | 5.41E-01 | 6.62E-01 |
| FLJ45079 | 0.0109  | 8.34E-01 | 8.91E-01 |
| FLJ45244 | 0.0099  | 8.49E-01 | 9.01E-01 |
| FLJ45340 | 0.0353  | 4.98E-01 | 6.24E-01 |
| FLJ45445 | 0.1759  | 6.64E-04 | 3.03E-03 |
| FLJ45983 | 0.0160  | 7.59E-01 | 8.38E-01 |
| FLJ46111 | -0.0155 | 7.66E-01 | 8.42E-01 |
| FLJ46321 | 0.1592  | 2.11E-03 | 8.04E-03 |
| FLJ46361 | -0.0693 | 1.83E-01 | 2.95E-01 |
| FLJ90757 | 0.1582  | 2.24E-03 | 8.47E-03 |
| FLNA     | 0.0624  | 2.31E-01 | 3.53E-01 |
| FLNB     | 0.1348  | 9.32E-03 | 2.76E-02 |
| FLNC     | 0.0718  | 1.68E-01 | 2.76E-01 |
| FLOT1    | 0.0921  | 7.63E-02 | 1.50E-01 |
| FLOT2    | 0.0405  | 4.36E-01 | 5.68E-01 |
| FLRT1    | 0.1824  | 4.13E-04 | 2.03E-03 |
| FLRT2    | -0.0346 | 5.07E-01 | 6.32E-01 |
| FLRT3    | -0.1748 | 7.21E-04 | 3.25E-03 |
| FLT1     | -0.1886 | 2.59E-04 | 1.37E-03 |
| FLT3LG   | -0.0919 | 7.70E-02 | 1.51E-01 |
| FLT3     | -0.1589 | 2.14E-03 | 8.15E-03 |
| FLT4     | -0.2106 | 4.35E-05 | 3.01E-04 |
| FLVCR1   | 0.3201  | 2.75E-10 | 7.46E-09 |
| FLVCR2   | -0.1628 | 1.65E-03 | 6.56E-03 |
| FLYWCH1  | 0.1059  | 4.15E-02 | 9.28E-02 |
| FLYWCH2  | 0.1829  | 3.99E-04 | 1.98E-03 |
| FMN1     | 0.0882  | 8.97E-02 | 1.71E-01 |
| FMN2     | 0.0900  | 8.35E-02 | 1.61E-01 |
| FMNL1    | 0.0290  | 5.77E-01 | 6.94E-01 |

|        |         |          |          |
|--------|---------|----------|----------|
| FMNL2  | 0.0286  | 5.83E-01 | 6.99E-01 |
| FMNL3  | 0.0063  | 9.04E-01 | 9.40E-01 |
| FMO1   | 0.1417  | 6.24E-03 | 1.98E-02 |
| FMO2   | -0.2047 | 7.14E-05 | 4.58E-04 |
| FMO3   | -0.1245 | 1.64E-02 | 4.38E-02 |
| FMO4   | -0.1933 | 1.79E-04 | 1.00E-03 |
| FMO5   | -0.0548 | 2.92E-01 | 4.21E-01 |
| FMO6P  | 0.0144  | 7.82E-01 | 8.55E-01 |
| FMO9P  | 0.0122  | 8.15E-01 | 8.79E-01 |
| FMOD   | -0.0246 | 6.37E-01 | 7.44E-01 |
| FMR1NB | 0.1435  | 5.62E-03 | 1.81E-02 |
| FMR1   | 0.1181  | 2.29E-02 | 5.73E-02 |
| FN1    | -0.0740 | 1.55E-01 | 2.60E-01 |
| FN3KRP | 0.2887  | 1.49E-08 | 2.66E-07 |
| FN3K   | -0.1181 | 2.29E-02 | 5.74E-02 |
| FNBP1L | 0.1180  | 2.30E-02 | 5.76E-02 |
| FNBP1  | 0.1692  | 1.07E-03 | 4.54E-03 |
| FNBP4  | 0.2875  | 1.72E-08 | 3.04E-07 |
| FNDC1  | -0.0280 | 5.91E-01 | 7.05E-01 |
| FNDC3A | -0.2017 | 9.12E-05 | 5.64E-04 |
| FNDC3B | 0.1362  | 8.64E-03 | 2.59E-02 |
| FNDC4  | -0.1626 | 1.68E-03 | 6.65E-03 |
| FNDC5  | -0.1466 | 4.66E-03 | 1.55E-02 |
| FNDC7  | 0.1427  | 5.88E-03 | 1.88E-02 |
| FNDC8  | 0.2298  | 7.78E-06 | 6.73E-05 |
| FNIP1  | -0.1943 | 1.66E-04 | 9.40E-04 |
| FNIP2  | -0.1246 | 1.63E-02 | 4.35E-02 |
| FNTA   | 0.1462  | 4.79E-03 | 1.59E-02 |
| FNTB   | 0.1097  | 3.47E-02 | 8.05E-02 |
| FOLH1B | -0.2983 | 4.65E-09 | 9.37E-08 |
| FOLH1  | -0.2479 | 1.33E-06 | 1.46E-05 |
| FOLR1  | 0.2007  | 9.95E-05 | 6.06E-04 |
| FOLR2  | -0.1329 | 1.04E-02 | 3.01E-02 |
| FOLR3  | 0.0762  | 1.43E-01 | 2.45E-01 |
| FOLR4  | 0.1107  | 3.30E-02 | 7.72E-02 |
| FOSB   | -0.1910 | 2.15E-04 | 1.17E-03 |
| FOSL1  | -0.1200 | 2.07E-02 | 5.29E-02 |
| FOSL2  | -0.0939 | 7.08E-02 | 1.42E-01 |
| FOS    | -0.1466 | 4.67E-03 | 1.56E-02 |
| FOXA1  | 0.0803  | 1.23E-01 | 2.18E-01 |
| FOXA2  | 0.0235  | 6.51E-01 | 7.55E-01 |
| FOXA3  | 0.0899  | 8.38E-02 | 1.61E-01 |
| FOXB1  | 0.0128  | 8.06E-01 | 8.72E-01 |
| FOXC1  | -0.0744 | 1.53E-01 | 2.57E-01 |

|         |         |          |          |
|---------|---------|----------|----------|
| FOXC2   | -0.0298 | 5.67E-01 | 6.85E-01 |
| FOXD1   | 0.1559  | 2.61E-03 | 9.59E-03 |
| FOXD2   | 0.1711  | 9.40E-04 | 4.08E-03 |
| FOXD3   | 0.1942  | 1.68E-04 | 9.48E-04 |
| FOXD4L1 | 0.1984  | 1.19E-04 | 7.09E-04 |
| FOXD4L2 | 0.0717  | 1.68E-01 | 2.77E-01 |
| FOXD4L3 | 0.0690  | 1.85E-01 | 2.98E-01 |
| FOXD4L5 | 0.0059  | 9.10E-01 | 9.43E-01 |
| FOXD4L6 | 0.1393  | 7.20E-03 | 2.23E-02 |
| FOXD4   | 0.1434  | 5.66E-03 | 1.83E-02 |
| FOXE1   | 0.0712  | 1.71E-01 | 2.81E-01 |
| FOXE3   | 0.0882  | 8.99E-02 | 1.71E-01 |
| FOXF1   | -0.1473 | 4.47E-03 | 1.51E-02 |
| FOXF2   | 0.0895  | 8.51E-02 | 1.63E-01 |
| FOXG1   | 0.1082  | 3.73E-02 | 8.54E-02 |
| FOXH1   | 0.0835  | 1.08E-01 | 1.98E-01 |
| FOXI1   | 0.1625  | 1.69E-03 | 6.68E-03 |
| FOXI2   | -0.0609 | 2.42E-01 | 3.66E-01 |
| FOXI3   | 0.2151  | 2.94E-05 | 2.15E-04 |
| FOXJ1   | 0.2735  | 8.71E-08 | 1.28E-06 |
| FOXJ2   | 0.1038  | 4.57E-02 | 1.00E-01 |
| FOXJ3   | 0.1834  | 3.83E-04 | 1.91E-03 |
| FOXK1   | 0.2950  | 6.96E-09 | 1.34E-07 |
| FOXK2   | 0.3789  | 4.11E-14 | 2.37E-12 |
| FOXL1   | 0.0077  | 8.83E-01 | 9.25E-01 |
| FOXL2   | 0.1113  | 3.20E-02 | 7.53E-02 |
| FOXM1   | 0.3945  | 2.87E-15 | 2.08E-13 |
| FOXN1   | 0.1544  | 2.86E-03 | 1.04E-02 |
| FOXN2   | 0.1033  | 4.67E-02 | 1.02E-01 |
| FOXN3   | -0.1095 | 3.49E-02 | 8.09E-02 |
| FOXN4   | 0.1060  | 4.13E-02 | 9.25E-02 |
| FOXO1   | -0.2019 | 9.00E-05 | 5.58E-04 |
| FOXO3B  | 0.1675  | 1.20E-03 | 5.01E-03 |
| FOXO3   | 0.1451  | 5.11E-03 | 1.68E-02 |
| FOXO4   | -0.0663 | 2.03E-01 | 3.20E-01 |
| FOXP1   | 0.1677  | 1.19E-03 | 4.97E-03 |
| FOXP2   | -0.1540 | 2.94E-03 | 1.06E-02 |
| FOXP3   | -0.0799 | 1.25E-01 | 2.20E-01 |
| FOXP4   | 0.0891  | 8.66E-02 | 1.66E-01 |
| FOXQ1   | 0.2714  | 1.10E-07 | 1.58E-06 |
| FOXR1   | -0.0020 | 9.69E-01 | 9.80E-01 |
| FOXR2   | 0.0942  | 7.00E-02 | 1.40E-01 |
| FOXRED1 | -0.1096 | 3.48E-02 | 8.06E-02 |
| FOXRED2 | 0.0408  | 4.33E-01 | 5.65E-01 |

|          |         |          |          |
|----------|---------|----------|----------|
| FOXS1    | 0.0413  | 4.27E-01 | 5.60E-01 |
| FPGS     | 0.0589  | 2.58E-01 | 3.84E-01 |
| FPGT     | 0.0148  | 7.76E-01 | 8.50E-01 |
| FPR1     | -0.0561 | 2.82E-01 | 4.10E-01 |
| FPR2     | -0.1307 | 1.17E-02 | 3.32E-02 |
| FPR3     | -0.0830 | 1.11E-01 | 2.01E-01 |
| FRAS1    | 0.1399  | 6.95E-03 | 2.16E-02 |
| FRAT1    | 0.0068  | 8.96E-01 | 9.34E-01 |
| FRAT2    | 0.1092  | 3.54E-02 | 8.18E-02 |
| FREM1    | 0.0830  | 1.11E-01 | 2.01E-01 |
| FREM2    | -0.0055 | 9.16E-01 | 9.47E-01 |
| FRG1B    | 0.0469  | 3.67E-01 | 5.00E-01 |
| FRG1     | -0.0632 | 2.25E-01 | 3.46E-01 |
| FRG2B    | 0.0963  | 6.40E-02 | 1.31E-01 |
| FRG2C    | 0.0627  | 2.28E-01 | 3.51E-01 |
| FRG2     | 0.0320  | 5.38E-01 | 6.60E-01 |
| FRK      | -0.0450 | 3.88E-01 | 5.21E-01 |
| FRMD1    | 0.1238  | 1.70E-02 | 4.51E-02 |
| FRMD3    | -0.1350 | 9.25E-03 | 2.75E-02 |
| FRMD4A   | 0.1197  | 2.11E-02 | 5.36E-02 |
| FRMD4B   | -0.0868 | 9.50E-02 | 1.79E-01 |
| FRMD5    | 0.1271  | 1.43E-02 | 3.91E-02 |
| FRMD6    | -0.0601 | 2.48E-01 | 3.73E-01 |
| FRMD7    | -0.1127 | 2.99E-02 | 7.14E-02 |
| FRMD8    | 0.2203  | 1.85E-05 | 1.44E-04 |
| FRMPD1   | -0.0231 | 6.58E-01 | 7.59E-01 |
| FRMPD2L1 | 0.0785  | 1.31E-01 | 2.29E-01 |
| FRMPD2   | 0.1187  | 2.22E-02 | 5.60E-02 |
| FRMPD4   | -0.0321 | 5.38E-01 | 6.60E-01 |
| FRRS1    | -0.1240 | 1.69E-02 | 4.47E-02 |
| FRS2     | 0.1421  | 6.12E-03 | 1.95E-02 |
| FRS3     | 0.2320  | 6.31E-06 | 5.66E-05 |
| FRYL     | 0.0288  | 5.81E-01 | 6.97E-01 |
| FRY      | -0.1245 | 1.64E-02 | 4.37E-02 |
| FRZB     | -0.0802 | 1.23E-01 | 2.18E-01 |
| FSCB     | 0.0851  | 1.02E-01 | 1.88E-01 |
| FSCN1    | -0.0017 | 9.73E-01 | 9.83E-01 |
| FSCN2    | 0.1085  | 3.67E-02 | 8.42E-02 |
| FSCN3    | 0.0169  | 7.46E-01 | 8.28E-01 |
| FSD1L    | 0.2670  | 1.78E-07 | 2.44E-06 |
| FSD1     | -0.0836 | 1.08E-01 | 1.98E-01 |
| FSD2     | -0.0539 | 3.00E-01 | 4.29E-01 |
| FSHR     | -0.1401 | 6.89E-03 | 2.15E-02 |
| FSIP1    | 0.0893  | 8.60E-02 | 1.65E-01 |

|          |         |          |          |
|----------|---------|----------|----------|
| FSTL1    | -0.1274 | 1.40E-02 | 3.86E-02 |
| FSTL3    | 0.0581  | 2.64E-01 | 3.91E-01 |
| FSTL4    | 0.0277  | 5.94E-01 | 7.08E-01 |
| FSTL5    | 0.0430  | 4.09E-01 | 5.42E-01 |
| FST      | -0.1791 | 5.29E-04 | 2.49E-03 |
| FTCD     | -0.1176 | 2.35E-02 | 5.87E-02 |
| FTH1     | 0.0246  | 6.37E-01 | 7.43E-01 |
| FTHL17   | 0.1336  | 9.96E-03 | 2.91E-02 |
| FTHL3    | 0.0924  | 7.56E-02 | 1.49E-01 |
| FTL      | -0.0307 | 5.56E-01 | 6.75E-01 |
| FTMT     | 0.0461  | 3.76E-01 | 5.10E-01 |
| FTO      | -0.3079 | 1.37E-09 | 3.16E-08 |
| FTSJ1    | 0.2644  | 2.38E-07 | 3.16E-06 |
| FTSJ2    | 0.1662  | 1.31E-03 | 5.41E-03 |
| FTSJ3    | 0.2813  | 3.54E-08 | 5.72E-07 |
| FTSJD1   | -0.1470 | 4.56E-03 | 1.53E-02 |
| FTSJD2   | 0.0473  | 3.64E-01 | 4.96E-01 |
| FUBP1    | 0.2754  | 6.99E-08 | 1.05E-06 |
| FUBP3    | 0.0400  | 4.42E-01 | 5.74E-01 |
| FUCA1    | -0.2565 | 5.48E-07 | 6.61E-06 |
| FUCA2    | 0.0473  | 3.64E-01 | 4.96E-01 |
| FUK      | -0.1568 | 2.45E-03 | 9.11E-03 |
| FUNDC1   | 0.2245  | 1.26E-05 | 1.03E-04 |
| FUNDC2P2 | 0.0621  | 2.33E-01 | 3.56E-01 |
| FUNDC2   | 0.2533  | 7.68E-07 | 8.96E-06 |
| FURIN    | -0.0725 | 1.64E-01 | 2.71E-01 |
| FUS      | 0.3324  | 5.11E-11 | 1.61E-09 |
| FUT10    | 0.0929  | 7.39E-02 | 1.46E-01 |
| FUT11    | -0.0247 | 6.35E-01 | 7.42E-01 |
| FUT1     | 0.1887  | 2.56E-04 | 1.36E-03 |
| FUT2     | 0.2820  | 3.28E-08 | 5.35E-07 |
| FUT3     | 0.1530  | 3.14E-03 | 1.12E-02 |
| FUT4     | 0.2491  | 1.18E-06 | 1.31E-05 |
| FUT5     | -0.1226 | 1.82E-02 | 4.75E-02 |
| FUT6     | -0.0638 | 2.20E-01 | 3.41E-01 |
| FUT7     | 0.0689  | 1.86E-01 | 2.99E-01 |
| FUT8     | 0.0485  | 3.52E-01 | 4.84E-01 |
| FUT9     | 0.0944  | 6.93E-02 | 1.39E-01 |
| FUZ      | -0.0385 | 4.60E-01 | 5.91E-01 |
| FXC1     | 0.0634  | 2.23E-01 | 3.44E-01 |
| FXN      | -0.2031 | 8.16E-05 | 5.13E-04 |
| FXR1     | 0.1158  | 2.58E-02 | 6.31E-02 |
| FXR2     | -0.0589 | 2.58E-01 | 3.83E-01 |
| FXYD1    | -0.1440 | 5.46E-03 | 1.77E-02 |

|           |         |          |          |
|-----------|---------|----------|----------|
| FXD2      | 0.0165  | 7.51E-01 | 8.32E-01 |
| FXD3      | 0.3384  | 2.16E-11 | 7.31E-10 |
| FXD4      | 0.0988  | 5.74E-02 | 1.20E-01 |
| FXD5      | 0.0160  | 7.59E-01 | 8.38E-01 |
| FXD6      | -0.2163 | 2.64E-05 | 1.97E-04 |
| FXD7      | 0.0385  | 4.60E-01 | 5.91E-01 |
| FYB       | -0.0681 | 1.91E-01 | 3.05E-01 |
| FYCO1     | -0.1255 | 1.56E-02 | 4.19E-02 |
| FYN       | -0.2979 | 4.85E-09 | 9.73E-08 |
| FYTTD1    | -0.1385 | 7.55E-03 | 2.32E-02 |
| FZD10     | 0.0031  | 9.53E-01 | 9.71E-01 |
| FZD1      | 0.1445  | 5.30E-03 | 1.73E-02 |
| FZD2      | 0.0635  | 2.22E-01 | 3.43E-01 |
| FZD3      | 0.0412  | 4.29E-01 | 5.61E-01 |
| FZD4      | -0.1945 | 1.63E-04 | 9.26E-04 |
| FZD5      | 0.1401  | 6.86E-03 | 2.14E-02 |
| FZD6      | 0.0276  | 5.96E-01 | 7.10E-01 |
| FZD7      | 0.1426  | 5.92E-03 | 1.90E-02 |
| FZD8      | 0.0074  | 8.87E-01 | 9.28E-01 |
| FZD9      | 0.1208  | 2.00E-02 | 5.13E-02 |
| FZR1      | -0.0222 | 6.71E-01 | 7.70E-01 |
| G0S2      | -0.1149 | 2.69E-02 | 6.53E-02 |
| G2E3      | 0.2165  | 2.59E-05 | 1.93E-04 |
| G3BP1     | -0.0930 | 7.36E-02 | 1.46E-01 |
| G3BP2     | -0.0352 | 4.99E-01 | 6.25E-01 |
| G6PC2     | -0.0237 | 6.50E-01 | 7.53E-01 |
| G6PC3     | 0.1830  | 3.95E-04 | 1.96E-03 |
| G6PC      | -0.1510 | 3.54E-03 | 1.24E-02 |
| G6PD      | 0.2855  | 2.17E-08 | 3.72E-07 |
| GAA       | -0.1044 | 4.45E-02 | 9.80E-02 |
| GAB1      | -0.0785 | 1.31E-01 | 2.29E-01 |
| GAB2      | -0.0308 | 5.55E-01 | 6.74E-01 |
| GAB3      | -0.0983 | 5.85E-02 | 1.22E-01 |
| GAB4      | 0.0963  | 6.39E-02 | 1.31E-01 |
| GABARAPL1 | -0.2800 | 4.15E-08 | 6.60E-07 |
| GABARAPL2 | -0.2036 | 7.84E-05 | 4.96E-04 |
| GABARAPL3 | -0.1217 | 1.90E-02 | 4.93E-02 |
| GABARAP   | -0.0865 | 9.63E-02 | 1.81E-01 |
| GABBR1    | 0.0827  | 1.12E-01 | 2.03E-01 |
| GABBR2    | 0.0262  | 6.14E-01 | 7.24E-01 |
| GABPA     | 0.0843  | 1.05E-01 | 1.93E-01 |
| GABPB1    | 0.1017  | 5.02E-02 | 1.08E-01 |
| GABPB2    | 0.4028  | 6.68E-16 | 5.68E-14 |
| GABRA1    | -0.0166 | 7.49E-01 | 8.31E-01 |



|            |         |          |          |
|------------|---------|----------|----------|
| GABRA2     | 0.0402  | 4.40E-01 | 5.72E-01 |
| GABRA3     | 0.0872  | 9.35E-02 | 1.76E-01 |
| GABRA4     | 0.0202  | 6.98E-01 | 7.92E-01 |
| GABRA5     | 0.0352  | 4.99E-01 | 6.25E-01 |
| GABRA6     | 0.1095  | 3.51E-02 | 8.11E-02 |
| GABRB1     | 0.0573  | 2.71E-01 | 3.99E-01 |
| GABRB2     | -0.0659 | 2.06E-01 | 3.23E-01 |
| GABRB3     | -0.0390 | 4.54E-01 | 5.85E-01 |
| GABRD      | 0.0824  | 1.13E-01 | 2.05E-01 |
| GABRE      | 0.1547  | 2.82E-03 | 1.03E-02 |
| GABRG1     | 0.0423  | 4.16E-01 | 5.49E-01 |
| GABRG2     | -0.0040 | 9.39E-01 | 9.62E-01 |
| GABRG3     | 0.0576  | 2.69E-01 | 3.96E-01 |
| GABRP      | -0.0174 | 7.38E-01 | 8.23E-01 |
| GABRQ      | 0.0376  | 4.70E-01 | 5.99E-01 |
| GABRR1     | 0.1751  | 7.07E-04 | 3.19E-03 |
| GABRR2     | 0.0192  | 7.13E-01 | 8.04E-01 |
| GABRR3     | -0.0228 | 6.62E-01 | 7.63E-01 |
| GAD1       | 0.1734  | 7.99E-04 | 3.55E-03 |
| GAD2       | 0.0717  | 1.68E-01 | 2.77E-01 |
| GADD45A    | -0.2485 | 1.26E-06 | 1.39E-05 |
| GADD45B    | -0.1998 | 1.06E-04 | 6.41E-04 |
| GADD45GIP1 | -0.0370 | 4.77E-01 | 6.06E-01 |
| GADD45G    | -0.1381 | 7.72E-03 | 2.36E-02 |
| GADL1      | -0.0638 | 2.20E-01 | 3.41E-01 |
| GAGE10     | 0.0188  | 7.19E-01 | 8.09E-01 |
| GAGE12D    | 0.1406  | 6.67E-03 | 2.09E-02 |
| GAGE12F    | 0.0585  | 2.61E-01 | 3.87E-01 |
| GAGE12J    | 0.1611  | 1.85E-03 | 7.23E-03 |
| GAGE13     | 0.1122  | 3.08E-02 | 7.29E-02 |
| GAGE1      | 0.1069  | 3.96E-02 | 8.95E-02 |
| GAGE2A     | 0.1258  | 1.54E-02 | 4.15E-02 |
| GAGE2B     | 0.1140  | 2.81E-02 | 6.79E-02 |
| GAGE2C     | 0.1015  | 5.07E-02 | 1.09E-01 |
| GAGE2D     | 0.0918  | 7.73E-02 | 1.52E-01 |
| GAGE2E     | 0.0930  | 7.36E-02 | 1.46E-01 |
| GAGE4      | 0.1461  | 4.80E-03 | 1.60E-02 |
| GAGE8      | 0.0834  | 1.09E-01 | 1.98E-01 |
| GAK        | -0.0505 | 3.32E-01 | 4.63E-01 |
| GAL3ST1    | 0.2193  | 2.02E-05 | 1.56E-04 |
| GAL3ST2    | 0.0993  | 5.60E-02 | 1.18E-01 |
| GAL3ST3    | 0.1295  | 1.26E-02 | 3.52E-02 |
| GAL3ST4    | 0.0304  | 5.59E-01 | 6.77E-01 |
| GALC       | 0.1450  | 5.14E-03 | 1.69E-02 |

|         |         |          |          |
|---------|---------|----------|----------|
| GALE    | -0.0036 | 9.45E-01 | 9.66E-01 |
| GALK1   | -0.0474 | 3.62E-01 | 4.95E-01 |
| GALK2   | -0.0848 | 1.03E-01 | 1.89E-01 |
| GALM    | -0.1300 | 1.22E-02 | 3.43E-02 |
| GALNS   | -0.1729 | 8.23E-04 | 3.63E-03 |
| GALNT10 | -0.0935 | 7.20E-02 | 1.44E-01 |
| GALNT11 | -0.0741 | 1.54E-01 | 2.59E-01 |
| GALNT12 | 0.0656  | 2.07E-01 | 3.25E-01 |
| GALNT13 | -0.0552 | 2.89E-01 | 4.18E-01 |
| GALNT14 | -0.0398 | 4.45E-01 | 5.77E-01 |
| GALNT1  | -0.0350 | 5.02E-01 | 6.28E-01 |
| GALNT2  | -0.0482 | 3.55E-01 | 4.87E-01 |
| GALNT3  | 0.0350  | 5.02E-01 | 6.27E-01 |
| GALNT4  | 0.0809  | 1.20E-01 | 2.14E-01 |
| GALNT5  | 0.0281  | 5.89E-01 | 7.04E-01 |
| GALNT6  | -0.0124 | 8.12E-01 | 8.77E-01 |
| GALNT7  | -0.0510 | 3.27E-01 | 4.58E-01 |
| GALNT8  | 0.0467  | 3.69E-01 | 5.02E-01 |
| GALNT9  | 0.0210  | 6.87E-01 | 7.83E-01 |
| GALNTL1 | -0.2029 | 8.29E-05 | 5.21E-04 |
| GALNTL2 | -0.3499 | 4.02E-12 | 1.60E-10 |
| GALNTL4 | 0.0626  | 2.29E-01 | 3.51E-01 |
| GALNTL5 | 0.0006  | 9.91E-01 | 9.94E-01 |
| GALNTL6 | -0.0871 | 9.38E-02 | 1.77E-01 |
| GALP    | -0.0702 | 1.77E-01 | 2.88E-01 |
| GALR1   | -0.0011 | 9.84E-01 | 9.90E-01 |
| GALR2   | -0.0020 | 9.69E-01 | 9.81E-01 |
| GALR3   | -0.1019 | 4.98E-02 | 1.07E-01 |
| GALT    | -0.0784 | 1.32E-01 | 2.29E-01 |
| GAL     | 0.0209  | 6.89E-01 | 7.85E-01 |
| GAMT    | -0.1777 | 5.86E-04 | 2.71E-03 |
| GANAB   | -0.1048 | 4.37E-02 | 9.68E-02 |
| GANC    | -0.1645 | 1.48E-03 | 5.97E-03 |
| GAN     | -0.1280 | 1.36E-02 | 3.77E-02 |
| GAP43   | 0.1018  | 5.02E-02 | 1.08E-01 |
| GAPDHS  | 0.0884  | 8.92E-02 | 1.70E-01 |
| GAPDH   | 0.0270  | 6.05E-01 | 7.17E-01 |
| GAPT    | -0.0031 | 9.52E-01 | 9.70E-01 |
| GAPVD1  | 0.1382  | 7.70E-03 | 2.36E-02 |
| GAR1    | 0.1319  | 1.10E-02 | 3.16E-02 |
| GARNL3  | -0.0671 | 1.97E-01 | 3.13E-01 |
| GARS    | -0.0163 | 7.54E-01 | 8.35E-01 |
| GART    | 0.0790  | 1.29E-01 | 2.26E-01 |
| GAS1    | -0.1075 | 3.85E-02 | 8.75E-02 |

|         |         |          |          |
|---------|---------|----------|----------|
| GAS2L1  | -0.0102 | 8.45E-01 | 8.99E-01 |
| GAS2L2  | 0.0409  | 4.32E-01 | 5.64E-01 |
| GAS2L3  | 0.1420  | 6.14E-03 | 1.95E-02 |
| GAS2    | -0.0455 | 3.82E-01 | 5.15E-01 |
| GAS5    | 0.3086  | 1.26E-09 | 2.92E-08 |
| GAS6    | -0.1256 | 1.55E-02 | 4.17E-02 |
| GAS7    | 0.0279  | 5.93E-01 | 7.07E-01 |
| GAS8    | -0.1169 | 2.44E-02 | 6.03E-02 |
| GAST    | 0.1291  | 1.28E-02 | 3.59E-02 |
| GATA1   | -0.1646 | 1.46E-03 | 5.91E-03 |
| GATA2   | -0.1072 | 3.90E-02 | 8.83E-02 |
| GATA3   | -0.0602 | 2.47E-01 | 3.72E-01 |
| GATA4   | 0.1542  | 2.90E-03 | 1.05E-02 |
| GATA5   | 0.0340  | 5.14E-01 | 6.38E-01 |
| GATA6   | -0.0863 | 9.70E-02 | 1.82E-01 |
| GATAD1  | -0.0775 | 1.36E-01 | 2.36E-01 |
| GATAD2A | -0.0567 | 2.76E-01 | 4.05E-01 |
| GATAD2B | 0.4261  | 8.54E-18 | 1.17E-15 |
| GATC    | -0.0124 | 8.12E-01 | 8.76E-01 |
| GATM    | -0.1636 | 1.57E-03 | 6.29E-03 |
| GATSL1  | -0.0191 | 7.14E-01 | 8.05E-01 |
| GATSL2  | -0.0777 | 1.35E-01 | 2.34E-01 |
| GATSL3  | -0.0759 | 1.45E-01 | 2.47E-01 |
| GATS    | -0.0702 | 1.77E-01 | 2.88E-01 |
| GBA2    | 0.1492  | 3.99E-03 | 1.37E-02 |
| GBA3    | -0.2487 | 1.23E-06 | 1.36E-05 |
| GBAP1   | 0.2742  | 8.05E-08 | 1.20E-06 |
| GBAS    | 0.0678  | 1.93E-01 | 3.08E-01 |
| GBA     | 0.2610  | 3.43E-07 | 4.40E-06 |
| GBE1    | -0.1919 | 2.00E-04 | 1.10E-03 |
| GBF1    | -0.0124 | 8.13E-01 | 8.77E-01 |
| GBGT1   | 0.0214  | 6.80E-01 | 7.78E-01 |
| GBP1    | -0.0742 | 1.54E-01 | 2.59E-01 |
| GBP2    | 0.0280  | 5.91E-01 | 7.05E-01 |
| GBP3    | -0.1059 | 4.14E-02 | 9.26E-02 |
| GBP4    | -0.0565 | 2.78E-01 | 4.06E-01 |
| GBP5    | -0.0281 | 5.89E-01 | 7.04E-01 |
| GBP6    | -0.0427 | 4.12E-01 | 5.45E-01 |
| GBP7    | -0.0855 | 1.00E-01 | 1.86E-01 |
| GBX1    | 0.1046  | 4.40E-02 | 9.72E-02 |
| GBX2    | -0.0153 | 7.69E-01 | 8.44E-01 |
| GCAT    | -0.2054 | 6.76E-05 | 4.37E-04 |
| GCA     | 0.0523  | 3.15E-01 | 4.45E-01 |
| GCC1    | -0.1501 | 3.77E-03 | 1.31E-02 |

|         |         |          |          |
|---------|---------|----------|----------|
| GCC2    | 0.0802  | 1.23E-01 | 2.18E-01 |
| GCDH    | -0.3472 | 5.95E-12 | 2.26E-10 |
| GCET2   | 0.0748  | 1.51E-01 | 2.55E-01 |
| GCFC1   | 0.3493  | 4.35E-12 | 1.71E-10 |
| GCGR    | -0.1818 | 4.32E-04 | 2.10E-03 |
| GCG     | 0.1093  | 3.53E-02 | 8.16E-02 |
| GCH1    | -0.1577 | 2.32E-03 | 8.71E-03 |
| GCHFR   | -0.1744 | 7.43E-04 | 3.34E-03 |
| GCKR    | -0.0795 | 1.26E-01 | 2.22E-01 |
| GCK     | -0.1463 | 4.76E-03 | 1.58E-02 |
| GCLC    | -0.1681 | 1.15E-03 | 4.85E-03 |
| GCLM    | 0.0646  | 2.14E-01 | 3.34E-01 |
| GCM1    | 0.0873  | 9.30E-02 | 1.76E-01 |
| GCM2    | 0.0152  | 7.70E-01 | 8.45E-01 |
| GCN1L1  | 0.2311  | 6.91E-06 | 6.11E-05 |
| GCNT1   | 0.0718  | 1.68E-01 | 2.76E-01 |
| GCNT2   | -0.0462 | 3.75E-01 | 5.08E-01 |
| GCNT3   | 0.1628  | 1.65E-03 | 6.57E-03 |
| GCNT4   | 0.0471  | 3.66E-01 | 4.98E-01 |
| GCNT7   | 0.0441  | 3.97E-01 | 5.30E-01 |
| GCOM1   | 0.0272  | 6.01E-01 | 7.14E-01 |
| GCSH    | -0.2661 | 1.96E-07 | 2.67E-06 |
| GC      | -0.0993 | 5.60E-02 | 1.17E-01 |
| GDAP1L1 | 0.0837  | 1.08E-01 | 1.97E-01 |
| GDAP1   | 0.1291  | 1.28E-02 | 3.58E-02 |
| GDAP2   | 0.1190  | 2.18E-02 | 5.52E-02 |
| GDA     | -0.0538 | 3.01E-01 | 4.31E-01 |
| GDE1    | -0.2052 | 6.82E-05 | 4.41E-04 |
| GDEP    | -0.0014 | 9.79E-01 | 9.86E-01 |
| GDF10   | 0.0789  | 1.29E-01 | 2.26E-01 |
| GDF11   | -0.0149 | 7.75E-01 | 8.49E-01 |
| GDF15   | 0.0081  | 8.76E-01 | 9.20E-01 |
| GDF1    | 0.1929  | 1.85E-04 | 1.03E-03 |
| GDF2    | -0.1690 | 1.09E-03 | 4.61E-03 |
| GDF3    | -0.0986 | 5.77E-02 | 1.20E-01 |
| GDF5    | -0.0597 | 2.51E-01 | 3.76E-01 |
| GDF6    | -0.1107 | 3.31E-02 | 7.74E-02 |
| GDF7    | -0.2440 | 1.98E-06 | 2.08E-05 |
| GDF9    | 0.0266  | 6.10E-01 | 7.21E-01 |
| GDI1    | 0.2319  | 6.39E-06 | 5.72E-05 |
| GDI2    | -0.0586 | 2.60E-01 | 3.86E-01 |
| GDNF    | -0.0003 | 9.96E-01 | 9.97E-01 |
| GDPD1   | 0.1662  | 1.31E-03 | 5.41E-03 |
| GDPD2   | 0.0799  | 1.25E-01 | 2.20E-01 |

|          |         |          |          |
|----------|---------|----------|----------|
| GDPD3    | 0.2438  | 2.02E-06 | 2.11E-05 |
| GDPD4    | -0.0429 | 4.10E-01 | 5.43E-01 |
| GDPD5    | 0.0572  | 2.71E-01 | 3.99E-01 |
| GEFT     | -0.0255 | 6.25E-01 | 7.33E-01 |
| GEMIN4   | 0.0951  | 6.72E-02 | 1.36E-01 |
| GEMIN5   | 0.1361  | 8.67E-03 | 2.60E-02 |
| GEMIN6   | 0.0532  | 3.07E-01 | 4.36E-01 |
| GEMIN7   | 0.1661  | 1.32E-03 | 5.44E-03 |
| GEMIN8P4 | 0.1201  | 2.07E-02 | 5.28E-02 |
| GEMIN8   | 0.0630  | 2.26E-01 | 3.48E-01 |
| GEM      | -0.0946 | 6.86E-02 | 1.38E-01 |
| GEN1     | 0.1585  | 2.20E-03 | 8.33E-03 |
| GET4     | 0.1430  | 5.80E-03 | 1.86E-02 |
| GFAP     | 0.0487  | 3.50E-01 | 4.82E-01 |
| GFER     | 0.0505  | 3.32E-01 | 4.63E-01 |
| GFI1B    | -0.0408 | 4.34E-01 | 5.66E-01 |
| GFI1     | 0.0135  | 7.96E-01 | 8.64E-01 |
| GFM1     | -0.1723 | 8.62E-04 | 3.78E-03 |
| GFM2     | -0.1459 | 4.87E-03 | 1.61E-02 |
| GFOD1    | -0.2223 | 1.54E-05 | 1.23E-04 |
| GFOD2    | -0.2633 | 2.67E-07 | 3.52E-06 |
| GFPT1    | 0.0211  | 6.85E-01 | 7.82E-01 |
| GFPT2    | -0.0162 | 7.55E-01 | 8.35E-01 |
| GFRA1    | -0.1525 | 3.23E-03 | 1.15E-02 |
| GFRA2    | -0.2069 | 5.95E-05 | 3.92E-04 |
| GFRA3    | 0.2270  | 1.01E-05 | 8.46E-05 |
| GFRA4    | -0.0028 | 9.57E-01 | 9.73E-01 |
| GFRAL    | 0.0136  | 7.94E-01 | 8.64E-01 |
| GGA1     | 0.1850  | 3.40E-04 | 1.73E-03 |
| GGA2     | 0.0641  | 2.18E-01 | 3.38E-01 |
| GGA3     | 0.3431  | 1.09E-11 | 3.85E-10 |
| GGCT     | 0.1490  | 4.02E-03 | 1.38E-02 |
| GGCX     | -0.2238 | 1.35E-05 | 1.09E-04 |
| GGH      | -0.0335 | 5.20E-01 | 6.44E-01 |
| GGNBP1   | 0.0779  | 1.34E-01 | 2.33E-01 |
| GGNBP2   | 0.3170  | 4.18E-10 | 1.09E-08 |
| GGN      | 0.0437  | 4.02E-01 | 5.34E-01 |
| GGPS1    | 0.2511  | 9.65E-07 | 1.10E-05 |
| GGT1     | 0.0097  | 8.52E-01 | 9.04E-01 |
| GGT3P    | 0.0222  | 6.70E-01 | 7.70E-01 |
| GGT5     | -0.1825 | 4.09E-04 | 2.02E-03 |
| GGT6     | 0.2252  | 1.19E-05 | 9.77E-05 |
| GGT7     | -0.0044 | 9.33E-01 | 9.58E-01 |
| GGT8P    | 0.0846  | 1.04E-01 | 1.91E-01 |

|        |         |          |          |
|--------|---------|----------|----------|
| GGTA1  | -0.1606 | 1.91E-03 | 7.42E-03 |
| GGTLC1 | 0.0374  | 4.73E-01 | 6.02E-01 |
| GGTLC2 | 0.0185  | 7.22E-01 | 8.12E-01 |
| GH1    | 0.0093  | 8.58E-01 | 9.08E-01 |
| GH2    | 0.0111  | 8.31E-01 | 8.89E-01 |
| GHDC   | -0.0570 | 2.74E-01 | 4.02E-01 |
| GHITM  | -0.3456 | 7.63E-12 | 2.81E-10 |
| GHRHR  | -0.0177 | 7.34E-01 | 8.20E-01 |
| GHRH   | -0.0380 | 4.65E-01 | 5.95E-01 |
| GHRLOS | 0.2009  | 9.78E-05 | 5.99E-04 |
| GHRL   | 0.1381  | 7.73E-03 | 2.36E-02 |
| GHR    | -0.2532 | 7.77E-07 | 9.04E-06 |
| GHSR   | 0.0325  | 5.32E-01 | 6.54E-01 |
| GIF    | 0.0479  | 3.57E-01 | 4.89E-01 |
| GIGYF1 | 0.2566  | 5.47E-07 | 6.61E-06 |
| GIGYF2 | 0.1310  | 1.15E-02 | 3.28E-02 |
| GIMAP1 | -0.1721 | 8.74E-04 | 3.83E-03 |
| GIMAP2 | -0.1376 | 7.97E-03 | 2.43E-02 |
| GIMAP4 | -0.1359 | 8.78E-03 | 2.63E-02 |
| GIMAP5 | -0.0656 | 2.08E-01 | 3.26E-01 |
| GIMAP6 | -0.2104 | 4.43E-05 | 3.05E-04 |
| GIMAP7 | -0.1794 | 5.17E-04 | 2.45E-03 |
| GIMAP8 | -0.2495 | 1.13E-06 | 1.26E-05 |
| GIN1   | -0.0843 | 1.05E-01 | 1.93E-01 |
| GIN1   | 0.4101  | 1.77E-16 | 1.73E-14 |
| GIN2   | 0.3406  | 1.57E-11 | 5.41E-10 |
| GIN3   | 0.2513  | 9.47E-07 | 1.08E-05 |
| GIN4   | 0.3324  | 5.07E-11 | 1.60E-09 |
| GIPC1  | -0.0022 | 9.67E-01 | 9.79E-01 |
| GIPC2  | 0.0819  | 1.15E-01 | 2.08E-01 |
| GIPC3  | -0.1379 | 7.82E-03 | 2.39E-02 |
| GIPR   | 0.1325  | 1.06E-02 | 3.07E-02 |
| GIP    | 0.0835  | 1.08E-01 | 1.98E-01 |
| GIT1   | 0.3534  | 2.36E-12 | 9.74E-11 |
| GIT2   | 0.1514  | 3.47E-03 | 1.22E-02 |
| GIYD2  | -0.0361 | 4.88E-01 | 6.15E-01 |
| GJA10  | -0.0172 | 7.41E-01 | 8.25E-01 |
| GJA1   | -0.1111 | 3.25E-02 | 7.62E-02 |
| GJA3   | 0.0919  | 7.71E-02 | 1.51E-01 |
| GJA4   | -0.1589 | 2.15E-03 | 8.16E-03 |
| GJA5   | -0.1475 | 4.42E-03 | 1.49E-02 |
| GJA8   | -0.0666 | 2.01E-01 | 3.17E-01 |
| GJA9   | 0.1626  | 1.68E-03 | 6.65E-03 |
| GJB1   | -0.0718 | 1.67E-01 | 2.76E-01 |

|          |         |          |          |
|----------|---------|----------|----------|
| GJB2     | -0.1392 | 7.23E-03 | 2.23E-02 |
| GJB3     | 0.0732  | 1.60E-01 | 2.66E-01 |
| GJB4     | -0.0032 | 9.50E-01 | 9.69E-01 |
| GJB5     | -0.0335 | 5.20E-01 | 6.44E-01 |
| GJB6     | 0.0960  | 6.48E-02 | 1.32E-01 |
| GJB7     | 0.1215  | 1.92E-02 | 4.97E-02 |
| GJC1     | 0.0741  | 1.54E-01 | 2.59E-01 |
| GJC2     | 0.0210  | 6.87E-01 | 7.83E-01 |
| GJC3     | -0.1820 | 4.27E-04 | 2.08E-03 |
| GJD2     | 0.0054  | 9.18E-01 | 9.48E-01 |
| GJD3     | -0.1074 | 3.87E-02 | 8.78E-02 |
| GJD4     | 0.1210  | 1.97E-02 | 5.08E-02 |
| GK2      | 0.1998  | 1.07E-04 | 6.45E-04 |
| GK3P     | -0.2100 | 4.58E-05 | 3.14E-04 |
| GK5      | 0.2308  | 7.11E-06 | 6.25E-05 |
| GKAP1    | 0.2915  | 1.07E-08 | 1.97E-07 |
| GKN1     | 0.0360  | 4.89E-01 | 6.16E-01 |
| GKN2     | -0.0569 | 2.75E-01 | 4.03E-01 |
| GK       | -0.2211 | 1.72E-05 | 1.35E-04 |
| GLA      | 0.1436  | 5.60E-03 | 1.81E-02 |
| GLB1L2   | 0.0900  | 8.34E-02 | 1.61E-01 |
| GLB1L3   | 0.0982  | 5.89E-02 | 1.22E-01 |
| GLB1L    | 0.0509  | 3.28E-01 | 4.59E-01 |
| GLB1     | -0.1207 | 2.00E-02 | 5.14E-02 |
| GLCCI1   | 0.0020  | 9.70E-01 | 9.81E-01 |
| GLCE     | 0.1189  | 2.20E-02 | 5.56E-02 |
| GLDC     | -0.0127 | 8.07E-01 | 8.73E-01 |
| GLDN     | 0.1462  | 4.78E-03 | 1.59E-02 |
| GLE1     | 0.2324  | 6.08E-06 | 5.48E-05 |
| GLG1     | -0.0580 | 2.65E-01 | 3.93E-01 |
| GLI1     | 0.0641  | 2.18E-01 | 3.38E-01 |
| GLI2     | 0.0080  | 8.79E-01 | 9.22E-01 |
| GLI3     | -0.1131 | 2.94E-02 | 7.02E-02 |
| GLI4     | 0.0670  | 1.98E-01 | 3.14E-01 |
| GLIPR1L1 | 0.1420  | 6.16E-03 | 1.96E-02 |
| GLIPR1L2 | -0.1250 | 1.60E-02 | 4.28E-02 |
| GLIPR1   | -0.0809 | 1.20E-01 | 2.14E-01 |
| GLIPR2   | -0.0405 | 4.37E-01 | 5.68E-01 |
| GLIS1    | -0.0020 | 9.69E-01 | 9.81E-01 |
| GLIS2    | 0.1749  | 7.17E-04 | 3.23E-03 |
| GLIS3    | 0.0368  | 4.80E-01 | 6.09E-01 |
| GLMN     | 0.3110  | 9.19E-10 | 2.19E-08 |
| GLO1     | 0.0989  | 5.70E-02 | 1.19E-01 |
| GLOD4    | -0.1721 | 8.76E-04 | 3.84E-03 |

|         |         |          |          |
|---------|---------|----------|----------|
| GLOD5   | -0.2183 | 2.22E-05 | 1.69E-04 |
| GLP1R   | 0.1295  | 1.26E-02 | 3.52E-02 |
| GLP2R   | -0.0810 | 1.19E-01 | 2.13E-01 |
| GLRA1   | -0.0427 | 4.12E-01 | 5.45E-01 |
| GLRA2   | -0.0069 | 8.94E-01 | 9.33E-01 |
| GLRA3   | -0.0118 | 8.20E-01 | 8.82E-01 |
| GLRA4   | -0.0183 | 7.25E-01 | 8.13E-01 |
| GLRB    | 0.1015  | 5.07E-02 | 1.09E-01 |
| GLRX2   | 0.0169  | 7.46E-01 | 8.29E-01 |
| GLRX3   | 0.0501  | 3.36E-01 | 4.67E-01 |
| GLRX5   | -0.1731 | 8.16E-04 | 3.61E-03 |
| GLRX    | -0.1944 | 1.64E-04 | 9.30E-04 |
| GLS2    | -0.1843 | 3.60E-04 | 1.82E-03 |
| GLS     | 0.1776  | 5.89E-04 | 2.72E-03 |
| GLT1D1  | -0.0671 | 1.98E-01 | 3.14E-01 |
| GLT25D1 | 0.1177  | 2.33E-02 | 5.82E-02 |
| GLT25D2 | 0.0449  | 3.89E-01 | 5.22E-01 |
| GLT6D1  | 0.0484  | 3.53E-01 | 4.84E-01 |
| GLT8D1  | -0.2017 | 9.13E-05 | 5.64E-04 |
| GLT8D2  | -0.1932 | 1.82E-04 | 1.01E-03 |
| GLTPD1  | -0.2303 | 7.44E-06 | 6.50E-05 |
| GLTPD2  | -0.1602 | 1.97E-03 | 7.61E-03 |
| GLTP    | 0.1019  | 4.98E-02 | 1.07E-01 |
| GLTSCR1 | 0.1874  | 2.84E-04 | 1.49E-03 |
| GLTSCR2 | 0.0303  | 5.61E-01 | 6.79E-01 |
| GLUD1   | -0.2212 | 1.72E-05 | 1.35E-04 |
| GLUD2   | -0.1489 | 4.04E-03 | 1.39E-02 |
| GLUL    | -0.0059 | 9.10E-01 | 9.43E-01 |
| GLYATL1 | -0.3036 | 2.39E-09 | 5.18E-08 |
| GLYATL2 | 0.1815  | 4.44E-04 | 2.15E-03 |
| GLYATL3 | 0.0114  | 8.26E-01 | 8.86E-01 |
| GLYAT   | -0.3111 | 9.15E-10 | 2.19E-08 |
| GLYCTK  | -0.1234 | 1.74E-02 | 4.58E-02 |
| GLYR1   | -0.1237 | 1.71E-02 | 4.53E-02 |
| GM2A    | -0.0008 | 9.89E-01 | 9.93E-01 |
| GMCL1L  | 0.1682  | 1.15E-03 | 4.84E-03 |
| GMCL1   | 0.0261  | 6.17E-01 | 7.27E-01 |
| GMDS    | -0.1384 | 7.58E-03 | 2.32E-02 |
| GMEB1   | 0.2611  | 3.40E-07 | 4.36E-06 |
| GMEB2   | 0.3444  | 8.98E-12 | 3.27E-10 |
| GMFB    | 0.1005  | 5.31E-02 | 1.13E-01 |
| GMFG    | -0.0731 | 1.60E-01 | 2.66E-01 |
| GMIP    | 0.1783  | 5.61E-04 | 2.62E-03 |
| GML     | 0.0476  | 3.61E-01 | 4.93E-01 |



|        |         |          |          |
|--------|---------|----------|----------|
| GMNN   | 0.3162  | 4.68E-10 | 1.20E-08 |
| GMPPA  | 0.0833  | 1.09E-01 | 1.99E-01 |
| GMPPB  | -0.0969 | 6.22E-02 | 1.28E-01 |
| GMPR2  | -0.1876 | 2.79E-04 | 1.46E-03 |
| GMPR   | -0.0971 | 6.17E-02 | 1.27E-01 |
| GMPS   | 0.3528  | 2.58E-12 | 1.06E-10 |
| GNA11  | -0.0637 | 2.21E-01 | 3.41E-01 |
| GNA12  | -0.0190 | 7.15E-01 | 8.06E-01 |
| GNA13  | 0.1489  | 4.05E-03 | 1.39E-02 |
| GNA14  | -0.2836 | 2.72E-08 | 4.51E-07 |
| GNA15  | -0.0441 | 3.97E-01 | 5.30E-01 |
| GNAI1  | -0.0516 | 3.21E-01 | 4.52E-01 |
| GNAI2  | -0.1083 | 3.70E-02 | 8.48E-02 |
| GNAI3  | 0.0904  | 8.21E-02 | 1.59E-01 |
| GNAL   | 0.0292  | 5.75E-01 | 6.92E-01 |
| GNAO1  | -0.3022 | 2.85E-09 | 6.06E-08 |
| GNAQ   | 0.0229  | 6.61E-01 | 7.62E-01 |
| GNASAS | 0.1107  | 3.31E-02 | 7.74E-02 |
| GNAS   | 0.1201  | 2.07E-02 | 5.27E-02 |
| GNAT1  | 0.0320  | 5.39E-01 | 6.60E-01 |
| GNAT2  | -0.1812 | 4.52E-04 | 2.19E-03 |
| GNAT3  | -0.1344 | 9.55E-03 | 2.82E-02 |
| GNAZ   | 0.2258  | 1.13E-05 | 9.35E-05 |
| GNB1L  | 0.0383  | 4.62E-01 | 5.92E-01 |
| GNB1   | -0.0363 | 4.86E-01 | 6.14E-01 |
| GNB2L1 | 0.0148  | 7.77E-01 | 8.50E-01 |
| GNB2   | -0.0776 | 1.36E-01 | 2.35E-01 |
| GNB3   | 0.2156  | 2.80E-05 | 2.07E-04 |
| GNB4   | -0.0860 | 9.81E-02 | 1.83E-01 |
| GNB5   | 0.0359  | 4.91E-01 | 6.18E-01 |
| GNE    | -0.2169 | 2.50E-05 | 1.88E-04 |
| GNG10  | 0.0396  | 4.47E-01 | 5.78E-01 |
| GNG11  | -0.1750 | 7.13E-04 | 3.22E-03 |
| GNG12  | -0.1258 | 1.53E-02 | 4.13E-02 |
| GNG13  | 0.1591  | 2.12E-03 | 8.08E-03 |
| GNG2   | -0.0988 | 5.73E-02 | 1.20E-01 |
| GNG3   | -0.0601 | 2.48E-01 | 3.73E-01 |
| GNG4   | 0.1842  | 3.61E-04 | 1.82E-03 |
| GNG5   | 0.1561  | 2.57E-03 | 9.47E-03 |
| GNG7   | -0.1581 | 2.26E-03 | 8.53E-03 |
| GNG8   | 0.1262  | 1.50E-02 | 4.07E-02 |
| GNGT1  | 0.0816  | 1.17E-01 | 2.10E-01 |
| GNGT2  | -0.0553 | 2.88E-01 | 4.17E-01 |
| GNL1   | 0.0675  | 1.94E-01 | 3.10E-01 |

|           |         |          |          |
|-----------|---------|----------|----------|
| GNL2      | 0.1869  | 2.95E-04 | 1.54E-03 |
| GNL3L     | 0.1150  | 2.68E-02 | 6.51E-02 |
| GNL3      | 0.1622  | 1.72E-03 | 6.78E-03 |
| GNLY      | -0.0374 | 4.72E-01 | 6.01E-01 |
| GNMT      | -0.0650 | 2.12E-01 | 3.31E-01 |
| GNPAT     | 0.1971  | 1.33E-04 | 7.78E-04 |
| GNPDA1    | 0.1658  | 1.35E-03 | 5.52E-03 |
| GNPDA2    | 0.1731  | 8.15E-04 | 3.60E-03 |
| GNPNAT1   | -0.1776 | 5.90E-04 | 2.73E-03 |
| GNPTAB    | -0.0178 | 7.33E-01 | 8.19E-01 |
| GNPTG     | -0.2313 | 6.75E-06 | 6.00E-05 |
| GNRH1     | 0.2700  | 1.28E-07 | 1.81E-06 |
| GNRH2     | -0.1051 | 4.31E-02 | 9.57E-02 |
| GNRHR2    | 0.1528  | 3.17E-03 | 1.13E-02 |
| GNRHR     | 0.0624  | 2.31E-01 | 3.53E-01 |
| GNS       | -0.1204 | 2.03E-02 | 5.20E-02 |
| GOLGA1    | 0.0174  | 7.38E-01 | 8.23E-01 |
| GOLGA2B   | 0.3154  | 5.15E-10 | 1.30E-08 |
| GOLGA2P3  | 0.0579  | 2.66E-01 | 3.93E-01 |
| GOLGA2    | 0.0551  | 2.90E-01 | 4.19E-01 |
| GOLGA3    | 0.1647  | 1.46E-03 | 5.90E-03 |
| GOLGA4    | -0.1077 | 3.81E-02 | 8.68E-02 |
| GOLGA5    | -0.2032 | 8.12E-05 | 5.11E-04 |
| GOLGA6A   | -0.1340 | 9.78E-03 | 2.87E-02 |
| GOLGA6B   | -0.1702 | 9.97E-04 | 4.29E-03 |
| GOLGA6C   | -0.1669 | 1.25E-03 | 5.19E-03 |
| GOLGA6D   | -0.0857 | 9.93E-02 | 1.85E-01 |
| GOLGA6L10 | 0.1542  | 2.90E-03 | 1.05E-02 |
| GOLGA6L1  | 0.0849  | 1.03E-01 | 1.89E-01 |
| GOLGA6L5  | 0.0908  | 8.06E-02 | 1.57E-01 |
| GOLGA6L6  | 0.0770  | 1.39E-01 | 2.39E-01 |
| GOLGA6L9  | 0.3144  | 5.88E-10 | 1.47E-08 |
| GOLGA7B   | 0.1634  | 1.59E-03 | 6.35E-03 |
| GOLGA7    | 0.0865  | 9.60E-02 | 1.80E-01 |
| GOLGA8A   | 0.2281  | 9.13E-06 | 7.76E-05 |
| GOLGA8B   | 0.2993  | 4.10E-09 | 8.40E-08 |
| GOLGA8C   | 0.2196  | 1.98E-05 | 1.53E-04 |
| GOLGA8DP  | 0.1615  | 1.81E-03 | 7.08E-03 |
| GOLGA8E   | 0.2069  | 5.95E-05 | 3.92E-04 |
| GOLGA8F   | 0.0639  | 2.19E-01 | 3.40E-01 |
| GOLGA8G   | 0.0534  | 3.05E-01 | 4.35E-01 |
| GOLGA9P   | 0.1030  | 4.75E-02 | 1.03E-01 |
| GOLGB1    | -0.0093 | 8.58E-01 | 9.08E-01 |
| GOLIM4    | -0.0478 | 3.58E-01 | 4.90E-01 |

|         |         |          |          |
|---------|---------|----------|----------|
| GOLM1   | 0.0761  | 1.43E-01 | 2.45E-01 |
| GOLPH3L | 0.4945  | 2.84E-24 | 1.49E-21 |
| GOLPH3  | -0.0015 | 9.77E-01 | 9.86E-01 |
| GOLT1A  | 0.0251  | 6.30E-01 | 7.37E-01 |
| GOLT1B  | 0.1975  | 1.29E-04 | 7.56E-04 |
| GON4L   | 0.3905  | 5.80E-15 | 3.94E-13 |
| GOPC    | 0.0851  | 1.02E-01 | 1.88E-01 |
| GORAB   | 0.3054  | 1.90E-09 | 4.24E-08 |
| GORASP1 | -0.0520 | 3.18E-01 | 4.48E-01 |
| GORASP2 | 0.1473  | 4.46E-03 | 1.50E-02 |
| GOSR1   | 0.1506  | 3.63E-03 | 1.27E-02 |
| GOSR2   | 0.2006  | 1.00E-04 | 6.10E-04 |
| GOT1L1  | 0.0504  | 3.33E-01 | 4.64E-01 |
| GOT1    | -0.2398 | 2.97E-06 | 2.94E-05 |
| GOT2    | -0.3071 | 1.52E-09 | 3.47E-08 |
| GP1BA   | 0.0047  | 9.28E-01 | 9.55E-01 |
| GP2     | 0.0896  | 8.48E-02 | 1.63E-01 |
| GP5     | -0.0600 | 2.49E-01 | 3.74E-01 |
| GP6     | -0.1678 | 1.18E-03 | 4.94E-03 |
| GP9     | -0.1045 | 4.43E-02 | 9.77E-02 |
| GPA33   | -0.0227 | 6.63E-01 | 7.64E-01 |
| GPAA1   | 0.0584  | 2.62E-01 | 3.89E-01 |
| GPAM    | -0.0768 | 1.40E-01 | 2.40E-01 |
| GPAT2   | -0.0409 | 4.32E-01 | 5.65E-01 |
| GPATCH1 | 0.3586  | 1.07E-12 | 4.76E-11 |
| GPATCH2 | 0.3056  | 1.84E-09 | 4.13E-08 |
| GPATCH3 | 0.0458  | 3.79E-01 | 5.12E-01 |
| GPATCH4 | 0.2976  | 5.02E-09 | 1.00E-07 |
| GPATCH8 | 0.1977  | 1.27E-04 | 7.46E-04 |
| GPBAR1  | -0.0875 | 9.25E-02 | 1.75E-01 |
| GPBP1L1 | -0.0669 | 1.99E-01 | 3.15E-01 |
| GPBP1   | 0.2652  | 2.18E-07 | 2.93E-06 |
| GPC1    | 0.0294  | 5.72E-01 | 6.89E-01 |
| GPC2    | 0.1591  | 2.12E-03 | 8.08E-03 |
| GPC3    | 0.2303  | 7.39E-06 | 6.46E-05 |
| GPC4    | 0.0694  | 1.82E-01 | 2.95E-01 |
| GPC5    | 0.1112  | 3.23E-02 | 7.58E-02 |
| GPC6    | 0.0682  | 1.90E-01 | 3.04E-01 |
| GPCPD1  | -0.0452 | 3.85E-01 | 5.19E-01 |
| GPD1L   | 0.1184  | 2.26E-02 | 5.67E-02 |
| GPD1    | -0.3384 | 2.18E-11 | 7.35E-10 |
| GPD2    | 0.2912  | 1.10E-08 | 2.03E-07 |
| GPER    | -0.1325 | 1.06E-02 | 3.07E-02 |
| GPHA2   | 0.1277  | 1.39E-02 | 3.83E-02 |

|         |         |          |          |
|---------|---------|----------|----------|
| GPHN    | -0.2433 | 2.12E-06 | 2.19E-05 |
| GPIHBP1 | -0.1588 | 2.15E-03 | 8.18E-03 |
| GPI     | -0.0756 | 1.46E-01 | 2.49E-01 |
| GPKOW   | 0.1951  | 1.55E-04 | 8.88E-04 |
| GPLD1   | -0.1662 | 1.31E-03 | 5.41E-03 |
| GPM6A   | -0.2523 | 8.49E-07 | 9.80E-06 |
| GPM6B   | 0.0169  | 7.46E-01 | 8.28E-01 |
| GPN1    | 0.1906  | 2.21E-04 | 1.20E-03 |
| GPN2    | 0.0142  | 7.85E-01 | 8.57E-01 |
| GPN3    | 0.0834  | 1.09E-01 | 1.99E-01 |
| GPNMB   | -0.0936 | 7.16E-02 | 1.43E-01 |
| GPR101  | -0.0042 | 9.35E-01 | 9.60E-01 |
| GPR107  | 0.2296  | 7.89E-06 | 6.81E-05 |
| GPR108  | -0.0413 | 4.28E-01 | 5.60E-01 |
| GPR109A | 0.0119  | 8.20E-01 | 8.82E-01 |
| GPR109B | 0.1018  | 5.00E-02 | 1.08E-01 |
| GPR110  | -0.0620 | 2.33E-01 | 3.57E-01 |
| GPR111  | 0.1211  | 1.96E-02 | 5.06E-02 |
| GPR112  | -0.0989 | 5.70E-02 | 1.19E-01 |
| GPR113  | -0.0107 | 8.37E-01 | 8.93E-01 |
| GPR114  | 0.1265  | 1.48E-02 | 4.02E-02 |
| GPR115  | 0.0807  | 1.21E-01 | 2.16E-01 |
| GPR116  | -0.2236 | 1.37E-05 | 1.11E-04 |
| GPR119  | 0.0188  | 7.18E-01 | 8.09E-01 |
| GPR120  | 0.1851  | 3.37E-04 | 1.72E-03 |
| GPR123  | -0.0174 | 7.38E-01 | 8.23E-01 |
| GPR124  | -0.0836 | 1.08E-01 | 1.97E-01 |
| GPR125  | -0.1497 | 3.86E-03 | 1.34E-02 |
| GPR126  | 0.0000  | 1.00E+00 | 1.00E+00 |
| GPR128  | -0.2033 | 8.04E-05 | 5.06E-04 |
| GPR12   | -0.0979 | 5.95E-02 | 1.23E-01 |
| GPR132  | -0.0508 | 3.29E-01 | 4.60E-01 |
| GPR133  | 0.0342  | 5.12E-01 | 6.36E-01 |
| GPR135  | 0.0756  | 1.46E-01 | 2.48E-01 |
| GPR137B | -0.0091 | 8.61E-01 | 9.10E-01 |
| GPR137C | 0.2200  | 1.91E-05 | 1.48E-04 |
| GPR137  | -0.0957 | 6.55E-02 | 1.33E-01 |
| GPR141  | -0.0603 | 2.47E-01 | 3.71E-01 |
| GPR142  | -0.0529 | 3.10E-01 | 4.39E-01 |
| GPR143  | -0.0120 | 8.18E-01 | 8.81E-01 |
| GPR144  | 0.1315  | 1.12E-02 | 3.21E-02 |
| GPR146  | -0.2988 | 4.35E-09 | 8.83E-08 |
| GPR148  | -0.0087 | 8.67E-01 | 9.15E-01 |
| GPR149  | -0.0531 | 3.08E-01 | 4.38E-01 |

|         |         |          |          |
|---------|---------|----------|----------|
| GPR150  | -0.0978 | 5.98E-02 | 1.24E-01 |
| GPR151  | 0.0300  | 5.65E-01 | 6.83E-01 |
| GPR152  | -0.0960 | 6.46E-02 | 1.32E-01 |
| GPR153  | -0.0616 | 2.37E-01 | 3.60E-01 |
| GPR155  | -0.2241 | 1.31E-05 | 1.06E-04 |
| GPR156  | 0.0560  | 2.82E-01 | 4.11E-01 |
| GPR157  | -0.0369 | 4.79E-01 | 6.07E-01 |
| GPR158  | 0.0071  | 8.92E-01 | 9.31E-01 |
| GPR15   | -0.0391 | 4.53E-01 | 5.84E-01 |
| GPR160  | 0.2031  | 8.14E-05 | 5.12E-04 |
| GPR161  | 0.1072  | 3.91E-02 | 8.84E-02 |
| GPR162  | -0.0186 | 7.21E-01 | 8.11E-01 |
| GPR171  | -0.0695 | 1.82E-01 | 2.94E-01 |
| GPR172A | 0.1918  | 2.02E-04 | 1.11E-03 |
| GPR172B | 0.0852  | 1.01E-01 | 1.87E-01 |
| GPR173  | -0.0377 | 4.69E-01 | 5.99E-01 |
| GPR174  | -0.0740 | 1.55E-01 | 2.60E-01 |
| GPR176  | 0.0089  | 8.65E-01 | 9.12E-01 |
| GPR179  | 0.0940  | 7.04E-02 | 1.41E-01 |
| GPR17   | -0.0821 | 1.15E-01 | 2.07E-01 |
| GPR180  | -0.0337 | 5.17E-01 | 6.42E-01 |
| GPR182  | -0.2517 | 9.11E-07 | 1.04E-05 |
| GPR183  | -0.0677 | 1.93E-01 | 3.08E-01 |
| GPR18   | -0.0427 | 4.12E-01 | 5.45E-01 |
| GPR19   | 0.3176  | 3.85E-10 | 1.01E-08 |
| GPR1    | 0.0858  | 9.88E-02 | 1.84E-01 |
| GPR20   | -0.1191 | 2.18E-02 | 5.50E-02 |
| GPR21   | -0.0114 | 8.27E-01 | 8.87E-01 |
| GPR22   | 0.0281  | 5.89E-01 | 7.04E-01 |
| GPR25   | 0.0424  | 4.15E-01 | 5.48E-01 |
| GPR26   | -0.0040 | 9.39E-01 | 9.62E-01 |
| GPR27   | 0.1015  | 5.07E-02 | 1.09E-01 |
| GPR31   | 0.0171  | 7.42E-01 | 8.26E-01 |
| GPR32   | -0.0036 | 9.45E-01 | 9.66E-01 |
| GPR34   | -0.0655 | 2.08E-01 | 3.26E-01 |
| GPR35   | 0.2295  | 8.02E-06 | 6.90E-05 |
| GPR37L1 | 0.1316  | 1.12E-02 | 3.20E-02 |
| GPR37   | -0.1422 | 6.09E-03 | 1.94E-02 |
| GPR39   | -0.0182 | 7.26E-01 | 8.14E-01 |
| GPR3    | -0.0500 | 3.37E-01 | 4.69E-01 |
| GPR44   | -0.0212 | 6.84E-01 | 7.81E-01 |
| GPR45   | 0.0054  | 9.18E-01 | 9.48E-01 |
| GPR4    | -0.1982 | 1.21E-04 | 7.18E-04 |
| GPR50   | 0.0411  | 4.29E-01 | 5.62E-01 |

|         |         |          |          |
|---------|---------|----------|----------|
| GPR52   | 0.0759  | 1.44E-01 | 2.46E-01 |
| GPR55   | -0.0113 | 8.29E-01 | 8.88E-01 |
| GPR56   | 0.0647  | 2.14E-01 | 3.34E-01 |
| GPR61   | 0.0433  | 4.06E-01 | 5.39E-01 |
| GPR62   | -0.0383 | 4.62E-01 | 5.92E-01 |
| GPR63   | 0.1572  | 2.39E-03 | 8.92E-03 |
| GPR64   | 0.1182  | 2.28E-02 | 5.71E-02 |
| GPR65   | -0.0993 | 5.59E-02 | 1.17E-01 |
| GPR68   | -0.0343 | 5.10E-01 | 6.35E-01 |
| GPR6    | 0.0074  | 8.87E-01 | 9.28E-01 |
| GPR75   | 0.0234  | 6.53E-01 | 7.56E-01 |
| GPR77   | 0.0194  | 7.10E-01 | 8.02E-01 |
| GPR78   | 0.0609  | 2.42E-01 | 3.67E-01 |
| GPR81   | -0.0029 | 9.55E-01 | 9.72E-01 |
| GPR82   | -0.0186 | 7.22E-01 | 8.11E-01 |
| GPR83   | 0.1780  | 5.71E-04 | 2.66E-03 |
| GPR84   | 0.1378  | 7.84E-03 | 2.39E-02 |
| GPR85   | 0.0190  | 7.16E-01 | 8.06E-01 |
| GPR87   | -0.0368 | 4.80E-01 | 6.09E-01 |
| GPR88   | -0.0100 | 8.47E-01 | 9.00E-01 |
| GPR89A  | 0.3476  | 5.66E-12 | 2.16E-10 |
| GPR89B  | 0.1889  | 2.53E-04 | 1.35E-03 |
| GPR89C  | 0.2882  | 1.59E-08 | 2.83E-07 |
| GPR97   | 0.0790  | 1.29E-01 | 2.26E-01 |
| GPR98   | -0.0345 | 5.08E-01 | 6.32E-01 |
| GPRASP1 | 0.0880  | 9.04E-02 | 1.72E-01 |
| GPRASP2 | -0.0405 | 4.37E-01 | 5.68E-01 |
| GPRC5A  | -0.0656 | 2.07E-01 | 3.25E-01 |
| GPRC5B  | 0.0356  | 4.94E-01 | 6.21E-01 |
| GPRC5C  | -0.0815 | 1.17E-01 | 2.10E-01 |
| GPRC5D  | 0.3297  | 7.42E-11 | 2.24E-09 |
| GPRC6A  | 0.1359  | 8.76E-03 | 2.62E-02 |
| GPRIN1  | 0.2797  | 4.29E-08 | 6.82E-07 |
| GPRIN2  | 0.1983  | 1.21E-04 | 7.16E-04 |
| GPRIN3  | -0.0891 | 8.66E-02 | 1.66E-01 |
| GPS1    | 0.0717  | 1.68E-01 | 2.77E-01 |
| GPS2    | 0.0877  | 9.18E-02 | 1.74E-01 |
| GPSM1   | 0.1629  | 1.65E-03 | 6.55E-03 |
| GPSM2   | 0.3970  | 1.87E-15 | 1.40E-13 |
| GPSM3   | -0.0401 | 4.41E-01 | 5.73E-01 |
| GPT2    | -0.2508 | 9.89E-07 | 1.12E-05 |
| GPT     | -0.3166 | 4.41E-10 | 1.14E-08 |
| GPX1    | -0.1404 | 6.78E-03 | 2.12E-02 |
| GPX2    | 0.0368  | 4.80E-01 | 6.09E-01 |

|         |         |          |          |
|---------|---------|----------|----------|
| GPX3    | -0.1628 | 1.65E-03 | 6.56E-03 |
| GPX4    | -0.1369 | 8.29E-03 | 2.51E-02 |
| GPX5    | 0.0115  | 8.26E-01 | 8.86E-01 |
| GPX6    | 0.0501  | 3.35E-01 | 4.67E-01 |
| GPX7    | 0.1263  | 1.49E-02 | 4.05E-02 |
| GPX8    | -0.0084 | 8.72E-01 | 9.17E-01 |
| GRAMD1A | 0.2084  | 5.21E-05 | 3.51E-04 |
| GRAMD1B | 0.0945  | 6.89E-02 | 1.39E-01 |
| GRAMD1C | -0.1129 | 2.97E-02 | 7.09E-02 |
| GRAMD2  | 0.0587  | 2.60E-01 | 3.86E-01 |
| GRAMD3  | -0.1895 | 2.41E-04 | 1.29E-03 |
| GRAMD4  | -0.0160 | 7.59E-01 | 8.38E-01 |
| GRAP2   | -0.0574 | 2.70E-01 | 3.98E-01 |
| GRAPL   | -0.1140 | 2.82E-02 | 6.80E-02 |
| GRAP    | -0.1588 | 2.16E-03 | 8.20E-03 |
| GRASP   | -0.1236 | 1.73E-02 | 4.56E-02 |
| GRB10   | -0.1396 | 7.08E-03 | 2.20E-02 |
| GRB14   | 0.0002  | 9.98E-01 | 9.98E-01 |
| GRB2    | 0.1620  | 1.74E-03 | 6.86E-03 |
| GRB7    | 0.2286  | 8.73E-06 | 7.45E-05 |
| GREB1L  | 0.0172  | 7.42E-01 | 8.26E-01 |
| GREB1   | -0.1370 | 8.23E-03 | 2.49E-02 |
| GREM1   | 0.0195  | 7.08E-01 | 8.00E-01 |
| GREM2   | -0.1767 | 6.31E-04 | 2.90E-03 |
| GRHL1   | 0.1115  | 3.18E-02 | 7.49E-02 |
| GRHL2   | 0.0273  | 6.01E-01 | 7.13E-01 |
| GRHL3   | 0.0368  | 4.80E-01 | 6.09E-01 |
| GRHPR   | -0.3193 | 3.09E-10 | 8.31E-09 |
| GRIA1   | 0.0304  | 5.59E-01 | 6.77E-01 |
| GRIA2   | 0.1971  | 1.33E-04 | 7.81E-04 |
| GRIA3   | -0.1825 | 4.10E-04 | 2.02E-03 |
| GRIA4   | 0.0641  | 2.18E-01 | 3.38E-01 |
| GRID1   | -0.0136 | 7.94E-01 | 8.63E-01 |
| GRID2IP | 0.2069  | 5.93E-05 | 3.92E-04 |
| GRID2   | 0.1054  | 4.24E-02 | 9.45E-02 |
| GRIK1   | -0.0665 | 2.01E-01 | 3.17E-01 |
| GRIK2   | 0.0580  | 2.65E-01 | 3.92E-01 |
| GRIK3   | -0.0326 | 5.31E-01 | 6.54E-01 |
| GRIK4   | 0.1227  | 1.80E-02 | 4.72E-02 |
| GRIK5   | 0.2577  | 4.85E-07 | 5.96E-06 |
| GRIN1   | 0.2154  | 2.85E-05 | 2.10E-04 |
| GRIN2A  | 0.1311  | 1.15E-02 | 3.26E-02 |
| GRIN2B  | 0.0015  | 9.77E-01 | 9.86E-01 |
| GRIN2C  | 0.0248  | 6.34E-01 | 7.41E-01 |

|         |         |          |          |
|---------|---------|----------|----------|
| GRIN2D  | 0.0806  | 1.21E-01 | 2.16E-01 |
| GRIN3A  | -0.0401 | 4.41E-01 | 5.73E-01 |
| GRIN3B  | 0.0282  | 5.89E-01 | 7.04E-01 |
| GRINA   | -0.0657 | 2.07E-01 | 3.25E-01 |
| GRINL1A | -0.0100 | 8.48E-01 | 9.00E-01 |
| GRIP1   | 0.0415  | 4.26E-01 | 5.58E-01 |
| GRIP2   | 0.0060  | 9.09E-01 | 9.43E-01 |
| GRIPAP1 | 0.0668  | 1.99E-01 | 3.15E-01 |
| GRK1    | 0.0992  | 5.64E-02 | 1.18E-01 |
| GRK4    | -0.0850 | 1.02E-01 | 1.89E-01 |
| GRK5    | -0.1347 | 9.38E-03 | 2.78E-02 |
| GRK6    | 0.1961  | 1.44E-04 | 8.34E-04 |
| GRK7    | 0.1851  | 3.39E-04 | 1.73E-03 |
| GRLF1   | -0.1188 | 2.21E-02 | 5.58E-02 |
| GRM1    | 0.1752  | 7.01E-04 | 3.17E-03 |
| GRM2    | 0.0485  | 3.52E-01 | 4.84E-01 |
| GRM3    | 0.0375  | 4.71E-01 | 6.00E-01 |
| GRM4    | 0.2429  | 2.21E-06 | 2.28E-05 |
| GRM5    | 0.1205  | 2.02E-02 | 5.19E-02 |
| GRM6    | 0.0839  | 1.07E-01 | 1.95E-01 |
| GRM7    | 0.0457  | 3.80E-01 | 5.14E-01 |
| GRM8    | 0.0477  | 3.60E-01 | 4.92E-01 |
| GRN     | 0.1528  | 3.17E-03 | 1.13E-02 |
| GRPEL1  | -0.2545 | 6.79E-07 | 8.04E-06 |
| GRPEL2  | 0.2025  | 8.58E-05 | 5.36E-04 |
| GRPR    | -0.0689 | 1.85E-01 | 2.98E-01 |
| GRP     | -0.0376 | 4.71E-01 | 6.00E-01 |
| GRRP1   | -0.2107 | 4.31E-05 | 2.99E-04 |
| GRSF1   | -0.1521 | 3.31E-03 | 1.17E-02 |
| GRTP1   | 0.0842  | 1.06E-01 | 1.94E-01 |
| GRWD1   | 0.0032  | 9.52E-01 | 9.70E-01 |
| GRXCR2  | 0.0368  | 4.80E-01 | 6.08E-01 |
| GSC     | 0.0770  | 1.39E-01 | 2.39E-01 |
| GSDMA   | -0.0165 | 7.51E-01 | 8.32E-01 |
| GSDMB   | 0.2485  | 1.26E-06 | 1.39E-05 |
| GSDMC   | 0.0734  | 1.58E-01 | 2.64E-01 |
| GSDMD   | -0.0034 | 9.48E-01 | 9.68E-01 |
| GSG1L   | -0.0274 | 5.98E-01 | 7.12E-01 |
| GSG1    | -0.0454 | 3.83E-01 | 5.17E-01 |
| GSG2    | 0.4113  | 1.42E-16 | 1.41E-14 |
| GSK3A   | 0.2078  | 5.49E-05 | 3.67E-04 |
| GSK3B   | -0.0708 | 1.73E-01 | 2.83E-01 |
| GSN     | -0.1638 | 1.55E-03 | 6.22E-03 |
| GSPT1   | -0.0488 | 3.49E-01 | 4.81E-01 |



|          |         |          |          |
|----------|---------|----------|----------|
| GSPT2    | 0.1458  | 4.90E-03 | 1.62E-02 |
| GSR      | 0.0661  | 2.04E-01 | 3.21E-01 |
| GSS      | -0.1208 | 2.00E-02 | 5.13E-02 |
| GSTA1    | -0.0757 | 1.45E-01 | 2.48E-01 |
| GSTA2    | -0.0790 | 1.29E-01 | 2.25E-01 |
| GSTA3    | 0.0790  | 1.29E-01 | 2.26E-01 |
| GSTA4    | 0.1660  | 1.33E-03 | 5.47E-03 |
| GSTA5    | 0.0444  | 3.94E-01 | 5.27E-01 |
| GSTCD    | 0.0817  | 1.16E-01 | 2.09E-01 |
| GSTK1    | -0.3513 | 3.22E-12 | 1.29E-10 |
| GSTM1    | -0.2067 | 6.05E-05 | 3.98E-04 |
| GSTM2P1  | -0.1564 | 2.53E-03 | 9.35E-03 |
| GSTM2    | -0.1779 | 5.78E-04 | 2.69E-03 |
| GSTM3    | -0.0291 | 5.76E-01 | 6.93E-01 |
| GSTM4    | -0.1927 | 1.89E-04 | 1.05E-03 |
| GSTM5    | -0.2427 | 2.24E-06 | 2.30E-05 |
| GSTO1    | -0.2482 | 1.30E-06 | 1.43E-05 |
| GSTO2    | 0.0687  | 1.87E-01 | 3.00E-01 |
| GSTP1    | -0.0323 | 5.36E-01 | 6.58E-01 |
| GSTT1    | -0.1405 | 6.70E-03 | 2.10E-02 |
| GSTT2    | -0.0656 | 2.08E-01 | 3.26E-01 |
| GSTTP1   | 0.0402  | 4.40E-01 | 5.72E-01 |
| GSTTP2   | -0.0113 | 8.28E-01 | 8.88E-01 |
| GSTZ1    | -0.3742 | 8.92E-14 | 4.74E-12 |
| GSX1     | 0.0113  | 8.29E-01 | 8.88E-01 |
| GSX2     | 0.1290  | 1.29E-02 | 3.60E-02 |
| GTDC1    | 0.0368  | 4.80E-01 | 6.09E-01 |
| GTF2A1L  | -0.1049 | 4.34E-02 | 9.62E-02 |
| GTF2A1   | -0.0985 | 5.79E-02 | 1.21E-01 |
| GTF2A2   | 0.0889  | 8.73E-02 | 1.67E-01 |
| GTF2B    | 0.0191  | 7.14E-01 | 8.05E-01 |
| GTF2E1   | 0.0447  | 3.90E-01 | 5.24E-01 |
| GTF2E2   | 0.1464  | 4.72E-03 | 1.57E-02 |
| GTF2F1   | 0.0686  | 1.87E-01 | 3.00E-01 |
| GTF2F2   | 0.0527  | 3.11E-01 | 4.41E-01 |
| GTF2H1   | 0.1842  | 3.61E-04 | 1.82E-03 |
| GTF2H2B  | 0.0361  | 4.88E-01 | 6.15E-01 |
| GTF2H2C  | 0.0728  | 1.62E-01 | 2.69E-01 |
| GTF2H2   | 0.0258  | 6.21E-01 | 7.30E-01 |
| GTF2H3   | -0.0030 | 9.54E-01 | 9.71E-01 |
| GTF2H4   | 0.2149  | 2.99E-05 | 2.18E-04 |
| GTF2H5   | 0.0169  | 7.46E-01 | 8.29E-01 |
| GTF2IP1  | -0.0176 | 7.35E-01 | 8.21E-01 |
| GTF2IRD1 | 0.2164  | 2.63E-05 | 1.96E-04 |

|            |         |          |          |
|------------|---------|----------|----------|
| GTF2IRD2B  | -0.1514 | 3.47E-03 | 1.22E-02 |
| GTF2IRD2P1 | -0.1492 | 3.98E-03 | 1.37E-02 |
| GTF2IRD2   | -0.1701 | 1.01E-03 | 4.32E-03 |
| GTF2I      | -0.0978 | 6.00E-02 | 1.24E-01 |
| GTF3A      | -0.0089 | 8.64E-01 | 9.12E-01 |
| GTF3C1     | 0.0145  | 7.81E-01 | 8.55E-01 |
| GTF3C2     | 0.2150  | 2.97E-05 | 2.17E-04 |
| GTF3C3     | 0.1533  | 3.07E-03 | 1.10E-02 |
| GTF3C4     | 0.0872  | 9.34E-02 | 1.76E-01 |
| GTF3C5     | 0.2385  | 3.38E-06 | 3.30E-05 |
| GTF3C6     | 0.1665  | 1.29E-03 | 5.32E-03 |
| GTPBP10    | -0.2281 | 9.10E-06 | 7.74E-05 |
| GTPBP1     | 0.1256  | 1.55E-02 | 4.17E-02 |
| GTPBP2     | 0.2697  | 1.33E-07 | 1.88E-06 |
| GTPBP3     | 0.2142  | 3.17E-05 | 2.29E-04 |
| GTPBP4     | 0.1838  | 3.74E-04 | 1.87E-03 |
| GTPBP5     | -0.0457 | 3.80E-01 | 5.14E-01 |
| GTPBP8     | -0.0594 | 2.54E-01 | 3.79E-01 |
| GTSE1      | 0.4095  | 1.96E-16 | 1.85E-14 |
| GTSF1L     | 0.0548  | 2.92E-01 | 4.21E-01 |
| GTSF1      | 0.0441  | 3.97E-01 | 5.30E-01 |
| GUCA1A     | 0.0434  | 4.05E-01 | 5.38E-01 |
| GUCA1B     | -0.0831 | 1.10E-01 | 2.00E-01 |
| GUCA1C     | 0.0399  | 4.43E-01 | 5.75E-01 |
| GUCA2A     | 0.0399  | 4.44E-01 | 5.75E-01 |
| GUCA2B     | -0.1313 | 1.14E-02 | 3.24E-02 |
| GUCY1A2    | -0.1650 | 1.43E-03 | 5.79E-03 |
| GUCY1A3    | -0.0168 | 7.47E-01 | 8.30E-01 |
| GUCY1B2    | 0.2790  | 4.64E-08 | 7.30E-07 |
| GUCY1B3    | -0.0112 | 8.30E-01 | 8.89E-01 |
| GUCY2C     | 0.0715  | 1.69E-01 | 2.78E-01 |
| GUCY2D     | 0.1674  | 1.21E-03 | 5.05E-03 |
| GUCY2E     | 0.1113  | 3.21E-02 | 7.54E-02 |
| GUCY2F     | 0.0565  | 2.78E-01 | 4.06E-01 |
| GUCY2GP    | 0.0107  | 8.37E-01 | 8.93E-01 |
| GUF1       | -0.1330 | 1.03E-02 | 2.99E-02 |
| GUK1       | -0.0130 | 8.03E-01 | 8.70E-01 |
| GULP1      | 0.0716  | 1.69E-01 | 2.78E-01 |
| GUSBL1     | 0.1101  | 3.40E-02 | 7.92E-02 |
| GUSBL2     | 0.2773  | 5.66E-08 | 8.72E-07 |
| GUSBP1     | 0.1979  | 1.25E-04 | 7.36E-04 |
| GUSBP3     | 0.1658  | 1.35E-03 | 5.52E-03 |
| GUSB       | -0.1244 | 1.65E-02 | 4.39E-02 |
| GVIN1      | -0.1344 | 9.57E-03 | 2.82E-02 |

|         |         |          |          |
|---------|---------|----------|----------|
| GXYLT1  | 0.0505  | 3.32E-01 | 4.63E-01 |
| GXYLT2  | -0.0186 | 7.21E-01 | 8.11E-01 |
| GYG1    | 0.0432  | 4.07E-01 | 5.40E-01 |
| GYG2    | -0.0922 | 7.61E-02 | 1.50E-01 |
| GYLTL1B | 0.0459  | 3.78E-01 | 5.11E-01 |
| GYPA    | -0.2149 | 3.00E-05 | 2.19E-04 |
| GYPB    | -0.1679 | 1.17E-03 | 4.90E-03 |
| GYPE    | -0.0081 | 8.77E-01 | 9.21E-01 |
| GYPC    | -0.1436 | 5.57E-03 | 1.80E-02 |
| GYS1    | 0.1219  | 1.88E-02 | 4.89E-02 |
| GYS2    | -0.2906 | 1.18E-08 | 2.15E-07 |
| GZF1    | 0.0637  | 2.21E-01 | 3.42E-01 |
| GZMA    | -0.1047 | 4.38E-02 | 9.70E-02 |
| GZMB    | -0.0714 | 1.70E-01 | 2.79E-01 |
| GZMH    | -0.1173 | 2.38E-02 | 5.92E-02 |
| GZMK    | -0.1198 | 2.10E-02 | 5.33E-02 |
| GZMM    | -0.0903 | 8.24E-02 | 1.60E-01 |
| H19     | 0.0531  | 3.08E-01 | 4.37E-01 |
| H1F0    | 0.1361  | 8.65E-03 | 2.60E-02 |
| H1FNT   | 0.0996  | 5.54E-02 | 1.17E-01 |
| H1FOO   | -0.0113 | 8.28E-01 | 8.87E-01 |
| H1FX    | 0.2374  | 3.78E-06 | 3.65E-05 |
| H2AFB1  | 0.3181  | 3.61E-10 | 9.55E-09 |
| H2AFJ   | -0.1141 | 2.80E-02 | 6.76E-02 |
| H2AFV   | 0.1283  | 1.34E-02 | 3.72E-02 |
| H2AFX   | 0.3347  | 3.69E-11 | 1.20E-09 |
| H2AFY2  | 0.0489  | 3.47E-01 | 4.79E-01 |
| H2AFY   | 0.3049  | 2.03E-09 | 4.49E-08 |
| H2AFZ   | 0.2879  | 1.63E-08 | 2.89E-07 |
| H2BFM   | 0.1440  | 5.45E-03 | 1.77E-02 |
| H2BFWT  | 0.0851  | 1.02E-01 | 1.88E-01 |
| H2BFXP  | 0.1036  | 4.61E-02 | 1.01E-01 |
| H3F3A   | 0.2913  | 1.09E-08 | 2.01E-07 |
| H3F3B   | 0.1546  | 2.83E-03 | 1.03E-02 |
| H3F3C   | 0.0405  | 4.37E-01 | 5.68E-01 |
| H6PD    | -0.1186 | 2.23E-02 | 5.61E-02 |
| HAAO    | -0.2142 | 3.18E-05 | 2.30E-04 |
| HABP2   | -0.0391 | 4.52E-01 | 5.83E-01 |
| HABP4   | -0.0102 | 8.44E-01 | 8.98E-01 |
| HACE1   | 0.2296  | 7.96E-06 | 6.86E-05 |
| HACL1   | -0.2036 | 7.84E-05 | 4.96E-04 |
| HADHA   | -0.2696 | 1.34E-07 | 1.90E-06 |
| HADHB   | -0.3022 | 2.83E-09 | 6.03E-08 |
| HADH    | -0.2938 | 8.05E-09 | 1.53E-07 |

|        |         |          |          |
|--------|---------|----------|----------|
| HAGHL  | 0.0769  | 1.39E-01 | 2.39E-01 |
| HAGH   | -0.2363 | 4.18E-06 | 3.98E-05 |
| HAL    | -0.0159 | 7.60E-01 | 8.38E-01 |
| HAMP   | -0.0612 | 2.39E-01 | 3.64E-01 |
| HAND1  | 0.0196  | 7.06E-01 | 7.99E-01 |
| HAND2  | -0.1234 | 1.74E-02 | 4.59E-02 |
| HAO1   | -0.2419 | 2.43E-06 | 2.47E-05 |
| HAO2   | -0.1629 | 1.64E-03 | 6.53E-03 |
| HAP1   | 0.1269  | 1.45E-02 | 3.96E-02 |
| HAPLN1 | 0.0006  | 9.91E-01 | 9.95E-01 |
| HAPLN2 | -0.0090 | 8.62E-01 | 9.11E-01 |
| HAPLN3 | 0.0334  | 5.21E-01 | 6.44E-01 |
| HAPLN4 | -0.1461 | 4.81E-03 | 1.60E-02 |
| HAR1A  | -0.0329 | 5.27E-01 | 6.50E-01 |
| HAR1B  | 0.0355  | 4.96E-01 | 6.22E-01 |
| HARBI1 | -0.0567 | 2.76E-01 | 4.05E-01 |
| HARS2  | 0.0900  | 8.33E-02 | 1.61E-01 |
| HARS   | -0.0274 | 5.99E-01 | 7.12E-01 |
| HAS1   | -0.0513 | 3.24E-01 | 4.54E-01 |
| HAS2AS | 0.0309  | 5.53E-01 | 6.73E-01 |
| HAS2   | -0.1002 | 5.38E-02 | 1.14E-01 |
| HAS3   | -0.0031 | 9.52E-01 | 9.71E-01 |
| HAT1   | 0.2523  | 8.55E-07 | 9.87E-06 |
| HAUS1  | 0.3035  | 2.41E-09 | 5.20E-08 |
| HAUS2  | 0.1835  | 3.81E-04 | 1.90E-03 |
| HAUS3  | 0.3577  | 1.23E-12 | 5.36E-11 |
| HAUS4  | 0.0346  | 5.06E-01 | 6.31E-01 |
| HAUS5  | 0.4495  | 7.45E-20 | 1.83E-17 |
| HAUS6  | 0.2647  | 2.30E-07 | 3.06E-06 |
| HAUS7  | 0.2050  | 6.95E-05 | 4.48E-04 |
| HAUS8  | 0.2934  | 8.42E-09 | 1.59E-07 |
| HAVCR1 | 0.0598  | 2.50E-01 | 3.75E-01 |
| HAVCR2 | -0.0663 | 2.02E-01 | 3.19E-01 |
| HAX1   | 0.3517  | 3.04E-12 | 1.23E-10 |
| HBA1   | -0.1435 | 5.63E-03 | 1.82E-02 |
| HBA2   | -0.2165 | 2.59E-05 | 1.93E-04 |
| HBBP1  | 0.0072  | 8.90E-01 | 9.29E-01 |
| HBB    | -0.1981 | 1.23E-04 | 7.27E-04 |
| HBD    | -0.1617 | 1.78E-03 | 6.99E-03 |
| HBE1   | 0.0971  | 6.16E-02 | 1.27E-01 |
| HBEGF  | -0.1000 | 5.43E-02 | 1.15E-01 |
| HBG1   | -0.1080 | 3.75E-02 | 8.58E-02 |
| HBG2   | -0.0407 | 4.34E-01 | 5.66E-01 |
| HBM    | -0.1723 | 8.63E-04 | 3.79E-03 |

|         |         |          |          |
|---------|---------|----------|----------|
| HBP1    | -0.2260 | 1.10E-05 | 9.16E-05 |
| HBQ1    | -0.0405 | 4.37E-01 | 5.68E-01 |
| HBS1L   | 0.0611  | 2.40E-01 | 3.64E-01 |
| HBXIP   | 0.0432  | 4.07E-01 | 5.39E-01 |
| HBZ     | -0.0364 | 4.85E-01 | 6.13E-01 |
| HCCS    | -0.0405 | 4.37E-01 | 5.68E-01 |
| HCFC1R1 | 0.0123  | 8.13E-01 | 8.77E-01 |
| HCFC1   | 0.3401  | 1.69E-11 | 5.81E-10 |
| HCFC2   | -0.1334 | 1.01E-02 | 2.95E-02 |
| HCG11   | -0.1564 | 2.52E-03 | 9.34E-03 |
| HCG18   | 0.2562  | 5.70E-07 | 6.84E-06 |
| HCG22   | 0.0045  | 9.31E-01 | 9.57E-01 |
| HCG26   | 0.0513  | 3.25E-01 | 4.55E-01 |
| HCG27   | 0.2007  | 9.95E-05 | 6.06E-04 |
| HCG2P7  | 0.1524  | 3.26E-03 | 1.16E-02 |
| HCG4P6  | 0.0184  | 7.24E-01 | 8.13E-01 |
| HCG4    | 0.0327  | 5.29E-01 | 6.52E-01 |
| HCG9    | 0.0026  | 9.60E-01 | 9.75E-01 |
| HCK     | -0.0468 | 3.69E-01 | 5.02E-01 |
| HCLS1   | -0.1019 | 4.98E-02 | 1.07E-01 |
| HCN1    | 0.0220  | 6.73E-01 | 7.72E-01 |
| HCN2    | -0.0557 | 2.84E-01 | 4.13E-01 |
| HCN3    | 0.3342  | 3.96E-11 | 1.27E-09 |
| HCN4    | 0.1639  | 1.54E-03 | 6.18E-03 |
| HCP5    | 0.0345  | 5.08E-01 | 6.33E-01 |
| HCRTR1  | -0.0044 | 9.33E-01 | 9.58E-01 |
| HCRTR2  | 0.0126  | 8.08E-01 | 8.74E-01 |
| HCRT    | 0.1235  | 1.74E-02 | 4.57E-02 |
| HCST    | -0.0571 | 2.73E-01 | 4.01E-01 |
| HDAC10  | 0.0627  | 2.28E-01 | 3.51E-01 |
| HDAC11  | 0.1830  | 3.96E-04 | 1.97E-03 |
| HDAC1   | 0.2248  | 1.23E-05 | 1.01E-04 |
| HDAC2   | 0.3553  | 1.77E-12 | 7.49E-11 |
| HDAC3   | -0.0175 | 7.37E-01 | 8.22E-01 |
| HDAC4   | 0.2404  | 2.82E-06 | 2.81E-05 |
| HDAC5   | 0.2197  | 1.96E-05 | 1.52E-04 |
| HDAC6   | -0.1809 | 4.61E-04 | 2.22E-03 |
| HDAC7   | 0.0970  | 6.19E-02 | 1.27E-01 |
| HDAC8   | 0.0399  | 4.43E-01 | 5.75E-01 |
| HDAC9   | -0.0265 | 6.11E-01 | 7.22E-01 |
| HDC     | -0.1464 | 4.73E-03 | 1.57E-02 |
| HDDC2   | 0.2730  | 9.19E-08 | 1.34E-06 |
| HDDC3   | -0.1627 | 1.66E-03 | 6.60E-03 |
| HDGFL1  | 0.0080  | 8.79E-01 | 9.22E-01 |

|          |         |          |          |
|----------|---------|----------|----------|
| HDGFRP2  | 0.1388  | 7.42E-03 | 2.29E-02 |
| HDGFRP3  | -0.0894 | 8.56E-02 | 1.64E-01 |
| HDGF     | 0.4019  | 7.76E-16 | 6.49E-14 |
| HDHD1A   | 0.0528  | 3.11E-01 | 4.40E-01 |
| HDHD2    | -0.1429 | 5.82E-03 | 1.87E-02 |
| HDHD3    | -0.0935 | 7.21E-02 | 1.44E-01 |
| HDLBP    | -0.0760 | 1.44E-01 | 2.46E-01 |
| HDX      | 0.0245  | 6.38E-01 | 7.44E-01 |
| HEATR1   | 0.2964  | 5.84E-09 | 1.15E-07 |
| HEATR2   | 0.1668  | 1.27E-03 | 5.25E-03 |
| HEATR3   | -0.1157 | 2.58E-02 | 6.32E-02 |
| HEATR4   | -0.0371 | 4.77E-01 | 6.05E-01 |
| HEATR5A  | -0.0908 | 8.06E-02 | 1.57E-01 |
| HEATR5B  | 0.0080  | 8.78E-01 | 9.21E-01 |
| HEATR6   | 0.2964  | 5.83E-09 | 1.15E-07 |
| HEATR7A  | 0.0200  | 7.01E-01 | 7.94E-01 |
| HEATR7B2 | 0.1436  | 5.58E-03 | 1.80E-02 |
| HEBP1    | -0.0879 | 9.10E-02 | 1.72E-01 |
| HEBP2    | 0.1399  | 6.95E-03 | 2.16E-02 |
| HECA     | 0.0216  | 6.78E-01 | 7.76E-01 |
| HECTD1   | -0.1526 | 3.21E-03 | 1.14E-02 |
| HECTD2   | 0.2578  | 4.81E-07 | 5.92E-06 |
| HECTD3   | -0.0938 | 7.13E-02 | 1.42E-01 |
| HECW1    | -0.0940 | 7.05E-02 | 1.41E-01 |
| HECW2    | -0.1762 | 6.52E-04 | 2.98E-03 |
| HEG1     | -0.0694 | 1.82E-01 | 2.94E-01 |
| HELB     | 0.0698  | 1.80E-01 | 2.91E-01 |
| HELLS    | 0.4006  | 9.89E-16 | 8.01E-14 |
| HELQ     | -0.0141 | 7.87E-01 | 8.58E-01 |
| HELT     | 0.1921  | 1.98E-04 | 1.09E-03 |
| HELZ     | 0.1664  | 1.29E-03 | 5.34E-03 |
| HEMGN    | -0.1706 | 9.71E-04 | 4.20E-03 |
| HEMK1    | -0.0061 | 9.06E-01 | 9.41E-01 |
| HEPACAM2 | 0.1845  | 3.53E-04 | 1.79E-03 |
| HEPACAM  | -0.2308 | 7.08E-06 | 6.23E-05 |
| HEPHL1   | 0.0694  | 1.82E-01 | 2.94E-01 |
| HEPH     | -0.1806 | 4.72E-04 | 2.26E-03 |
| HEPN1    | -0.2184 | 2.20E-05 | 1.68E-04 |
| HERC1    | -0.0639 | 2.20E-01 | 3.40E-01 |
| HERC2P2  | 0.2365  | 4.13E-06 | 3.94E-05 |
| HERC2P4  | 0.1125  | 3.03E-02 | 7.21E-02 |
| HERC2    | -0.0273 | 6.00E-01 | 7.13E-01 |
| HERC3    | -0.1969 | 1.34E-04 | 7.86E-04 |
| HERC4    | -0.1305 | 1.19E-02 | 3.36E-02 |

|         |         |          |          |
|---------|---------|----------|----------|
| HERC5   | -0.1102 | 3.39E-02 | 7.90E-02 |
| HERC6   | -0.1743 | 7.44E-04 | 3.34E-03 |
| HERPUD1 | -0.3827 | 2.17E-14 | 1.32E-12 |
| HERPUD2 | -0.1956 | 1.49E-04 | 8.60E-04 |
| HES1    | 0.0520  | 3.18E-01 | 4.48E-01 |
| HES2    | 0.0790  | 1.29E-01 | 2.26E-01 |
| HES3    | 0.0436  | 4.02E-01 | 5.35E-01 |
| HES4    | 0.0839  | 1.06E-01 | 1.95E-01 |
| HES5    | -0.0688 | 1.86E-01 | 2.99E-01 |
| HES6    | 0.1138  | 2.84E-02 | 6.83E-02 |
| HES7    | 0.0715  | 1.69E-01 | 2.78E-01 |
| HESRG   | -0.0079 | 8.80E-01 | 9.23E-01 |
| HESX1   | -0.0337 | 5.17E-01 | 6.42E-01 |
| HEXA    | -0.2019 | 9.03E-05 | 5.59E-04 |
| HEXB    | -0.0349 | 5.03E-01 | 6.28E-01 |
| HEXDC   | 0.1391  | 7.30E-03 | 2.26E-02 |
| HEXIM1  | 0.0116  | 8.24E-01 | 8.85E-01 |
| HEXIM2  | -0.0607 | 2.43E-01 | 3.68E-01 |
| HEY1    | 0.1013  | 5.11E-02 | 1.09E-01 |
| HEY2    | -0.1109 | 3.27E-02 | 7.67E-02 |
| HEYL    | -0.0063 | 9.04E-01 | 9.39E-01 |
| HFE2    | -0.1210 | 1.97E-02 | 5.08E-02 |
| HFE     | -0.0571 | 2.73E-01 | 4.01E-01 |
| HFM1    | 0.1419  | 6.19E-03 | 1.96E-02 |
| HGC6.3  | 0.1580  | 2.27E-03 | 8.55E-03 |
| HGD     | -0.2466 | 1.51E-06 | 1.63E-05 |
| HGFAC   | -0.0801 | 1.24E-01 | 2.19E-01 |
| HGF     | -0.0826 | 1.12E-01 | 2.04E-01 |
| HGSNAT  | -0.0029 | 9.56E-01 | 9.72E-01 |
| HGS     | 0.4081  | 2.56E-16 | 2.34E-14 |
| HHATL   | -0.0486 | 3.51E-01 | 4.83E-01 |
| HHAT    | 0.0274  | 5.98E-01 | 7.12E-01 |
| HHEX    | 0.1895  | 2.42E-04 | 1.30E-03 |
| HHIPL1  | 0.0104  | 8.42E-01 | 8.97E-01 |
| HHIPL2  | 0.1312  | 1.14E-02 | 3.25E-02 |
| HHIP    | -0.1225 | 1.83E-02 | 4.77E-02 |
| HHLA1   | 0.0184  | 7.24E-01 | 8.13E-01 |
| HHLA2   | 0.1311  | 1.15E-02 | 3.26E-02 |
| HHLA3   | -0.1296 | 1.25E-02 | 3.50E-02 |
| HIAT1   | -0.0230 | 6.58E-01 | 7.60E-01 |
| HIATL1  | 0.2839  | 2.62E-08 | 4.35E-07 |
| HIATL2  | 0.2335  | 5.50E-06 | 5.02E-05 |
| HIBADH  | -0.3222 | 2.07E-10 | 5.73E-09 |
| HIBCH   | -0.2633 | 2.66E-07 | 3.51E-06 |

|           |         |          |          |
|-----------|---------|----------|----------|
| HIC1      | -0.1722 | 8.68E-04 | 3.80E-03 |
| HIC2      | 0.2597  | 3.91E-07 | 4.92E-06 |
| HIF1AN    | 0.0352  | 5.00E-01 | 6.25E-01 |
| HIF1A     | 0.0348  | 5.04E-01 | 6.29E-01 |
| HIF3A     | -0.0852 | 1.01E-01 | 1.87E-01 |
| HIGD1A    | -0.3092 | 1.17E-09 | 2.72E-08 |
| HIGD1B    | 0.0580  | 2.65E-01 | 3.92E-01 |
| HIGD1C    | 0.0344  | 5.09E-01 | 6.34E-01 |
| HIGD2A    | -0.0519 | 3.19E-01 | 4.49E-01 |
| HIGD2B    | -0.0503 | 3.33E-01 | 4.64E-01 |
| HILS1     | 0.1575  | 2.35E-03 | 8.80E-03 |
| HINFP     | 0.3694  | 1.94E-13 | 9.85E-12 |
| HINT1     | -0.0134 | 7.96E-01 | 8.65E-01 |
| HINT2     | -0.1969 | 1.35E-04 | 7.89E-04 |
| HINT3     | 0.0332  | 5.24E-01 | 6.47E-01 |
| HIP1R     | 0.0674  | 1.95E-01 | 3.11E-01 |
| HIP1      | -0.0429 | 4.10E-01 | 5.43E-01 |
| HIPK1     | -0.0227 | 6.63E-01 | 7.64E-01 |
| HIPK2     | -0.1528 | 3.16E-03 | 1.13E-02 |
| HIPK3     | -0.0894 | 8.56E-02 | 1.64E-01 |
| HIPK4     | 0.0619  | 2.34E-01 | 3.58E-01 |
| HIRA      | 0.0246  | 6.37E-01 | 7.43E-01 |
| HIRIP3    | 0.0084  | 8.71E-01 | 9.17E-01 |
| HIST1H1A  | 0.0358  | 4.92E-01 | 6.19E-01 |
| HIST1H1B  | 0.1836  | 3.80E-04 | 1.90E-03 |
| HIST1H1C  | -0.1354 | 9.02E-03 | 2.69E-02 |
| HIST1H1D  | 0.0729  | 1.61E-01 | 2.68E-01 |
| HIST1H1E  | 0.1385  | 7.55E-03 | 2.32E-02 |
| HIST1H1T  | 0.0418  | 4.22E-01 | 5.55E-01 |
| HIST1H2AA | 0.0721  | 1.66E-01 | 2.73E-01 |
| HIST1H2AB | 0.0688  | 1.86E-01 | 2.99E-01 |
| HIST1H2AC | -0.1841 | 3.64E-04 | 1.84E-03 |
| HIST1H2AD | 0.0720  | 1.66E-01 | 2.74E-01 |
| HIST1H2AE | -0.0882 | 8.98E-02 | 1.71E-01 |
| HIST1H2AG | -0.0081 | 8.77E-01 | 9.21E-01 |
| HIST1H2AH | 0.1919  | 2.01E-04 | 1.11E-03 |
| HIST1H2AJ | 0.0748  | 1.51E-01 | 2.55E-01 |
| HIST1H2AK | 0.0613  | 2.39E-01 | 3.63E-01 |
| HIST1H2AL | 0.1292  | 1.28E-02 | 3.57E-02 |
| HIST1H2AM | 0.0651  | 2.11E-01 | 3.30E-01 |
| HIST1H2BA | 0.0460  | 3.76E-01 | 5.10E-01 |
| HIST1H2BB | 0.1125  | 3.02E-02 | 7.19E-02 |
| HIST1H2BC | -0.2104 | 4.42E-05 | 3.05E-04 |
| HIST1H2BD | -0.1445 | 5.30E-03 | 1.73E-02 |



|            |         |          |          |
|------------|---------|----------|----------|
| HIST1H2BE  | -0.1020 | 4.96E-02 | 1.07E-01 |
| HIST1H2BF  | 0.0845  | 1.04E-01 | 1.92E-01 |
| HIST1H2BG  | 0.0710  | 1.73E-01 | 2.82E-01 |
| HIST1H2BH  | 0.0427  | 4.13E-01 | 5.45E-01 |
| HIST1H2BI  | -0.0306 | 5.56E-01 | 6.75E-01 |
| HIST1H2BJ  | 0.0902  | 8.27E-02 | 1.60E-01 |
| HIST1H2BK  | -0.1045 | 4.42E-02 | 9.75E-02 |
| HIST1H2BL  | 0.0565  | 2.78E-01 | 4.07E-01 |
| HIST1H2BM  | 0.0468  | 3.69E-01 | 5.02E-01 |
| HIST1H2BN  | 0.0198  | 7.03E-01 | 7.96E-01 |
| HIST1H2BO  | 0.1732  | 8.10E-04 | 3.59E-03 |
| HIST1H3A   | -0.1010 | 5.18E-02 | 1.11E-01 |
| HIST1H3B   | 0.0245  | 6.39E-01 | 7.45E-01 |
| HIST1H3C   | 0.1656  | 1.37E-03 | 5.59E-03 |
| HIST1H3D   | 0.0086  | 8.69E-01 | 9.16E-01 |
| HIST1H3E   | -0.1685 | 1.12E-03 | 4.74E-03 |
| HIST1H3F   | 0.0723  | 1.65E-01 | 2.73E-01 |
| HIST1H3G   | -0.0567 | 2.76E-01 | 4.04E-01 |
| HIST1H3H   | -0.0318 | 5.41E-01 | 6.62E-01 |
| HIST1H3I   | 0.1265  | 1.48E-02 | 4.02E-02 |
| HIST1H3J   | 0.1831  | 3.92E-04 | 1.95E-03 |
| HIST1H4A   | 0.1360  | 8.72E-03 | 2.62E-02 |
| HIST1H4B   | 0.0941  | 7.03E-02 | 1.41E-01 |
| HIST1H4C   | 0.1282  | 1.35E-02 | 3.73E-02 |
| HIST1H4D   | 0.1831  | 3.92E-04 | 1.95E-03 |
| HIST1H4E   | 0.2025  | 8.54E-05 | 5.33E-04 |
| HIST1H4F   | 0.0032  | 9.51E-01 | 9.69E-01 |
| HIST1H4H   | -0.0196 | 7.07E-01 | 7.99E-01 |
| HIST1H4I   | 0.0382  | 4.63E-01 | 5.93E-01 |
| HIST1H4J   | -0.0753 | 1.48E-01 | 2.51E-01 |
| HIST1H4K   | 0.0012  | 9.81E-01 | 9.88E-01 |
| HIST1H4L   | 0.1234  | 1.74E-02 | 4.58E-02 |
| HIST2H2AA3 | -0.0054 | 9.18E-01 | 9.48E-01 |
| HIST2H2AB  | 0.1455  | 4.99E-03 | 1.64E-02 |
| HIST2H2AC  | 0.1971  | 1.32E-04 | 7.77E-04 |
| HIST2H2BA  | 0.0562  | 2.81E-01 | 4.09E-01 |
| HIST2H2BE  | 0.0682  | 1.90E-01 | 3.04E-01 |
| HIST2H2BF  | 0.1578  | 2.30E-03 | 8.66E-03 |
| HIST2H3C   | 0.2789  | 4.68E-08 | 7.35E-07 |
| HIST2H3D   | 0.1693  | 1.06E-03 | 4.51E-03 |
| HIST2H4A   | 0.2659  | 2.00E-07 | 2.71E-06 |
| HIST3H2A   | 0.1742  | 7.55E-04 | 3.38E-03 |
| HIST3H2BB  | 0.1530  | 3.13E-03 | 1.12E-02 |
| HIST3H3    | 0.0793  | 1.27E-01 | 2.24E-01 |

|          |         |          |          |
|----------|---------|----------|----------|
| HIST4H4  | 0.1670  | 1.24E-03 | 5.16E-03 |
| HIVEP1   | -0.0684 | 1.89E-01 | 3.02E-01 |
| HIVEP2   | 0.0352  | 4.99E-01 | 6.25E-01 |
| HIVEP3   | -0.0508 | 3.29E-01 | 4.60E-01 |
| HJURP    | 0.4662  | 2.02E-21 | 5.91E-19 |
| HK1      | -0.0993 | 5.59E-02 | 1.17E-01 |
| HK2      | 0.0755  | 1.46E-01 | 2.49E-01 |
| HK3      | -0.0456 | 3.81E-01 | 5.14E-01 |
| HKDC1    | 0.0827  | 1.12E-01 | 2.03E-01 |
| HKR1     | 0.2180  | 2.27E-05 | 1.72E-04 |
| HLA-A    | -0.0662 | 2.04E-01 | 3.21E-01 |
| HLA-B    | -0.0845 | 1.04E-01 | 1.92E-01 |
| HLA-C    | -0.0940 | 7.06E-02 | 1.41E-01 |
| HLA-DMA  | -0.0142 | 7.86E-01 | 8.58E-01 |
| HLA-DMB  | -0.0102 | 8.45E-01 | 8.99E-01 |
| HLA-DOA  | -0.0518 | 3.20E-01 | 4.50E-01 |
| HLA-DOB  | 0.0915  | 7.83E-02 | 1.53E-01 |
| HLA-DPA1 | -0.0823 | 1.14E-01 | 2.05E-01 |
| HLA-DPB1 | -0.0509 | 3.29E-01 | 4.59E-01 |
| HLA-DPB2 | 0.0108  | 8.36E-01 | 8.93E-01 |
| HLA-DQA1 | -0.0533 | 3.06E-01 | 4.36E-01 |
| HLA-DQA2 | 0.0560  | 2.82E-01 | 4.11E-01 |
| HLA-DQB1 | -0.0602 | 2.48E-01 | 3.73E-01 |
| HLA-DQB2 | 0.0512  | 3.25E-01 | 4.56E-01 |
| HLA-DRA  | -0.0561 | 2.81E-01 | 4.10E-01 |
| HLA-DRB1 | -0.0764 | 1.42E-01 | 2.43E-01 |
| HLA-DRB5 | -0.0612 | 2.40E-01 | 3.64E-01 |
| HLA-DRB6 | 0.0202  | 6.98E-01 | 7.91E-01 |
| HLA-E    | -0.1849 | 3.44E-04 | 1.75E-03 |
| HLA-F    | -0.0203 | 6.97E-01 | 7.91E-01 |
| HLA-G    | -0.0531 | 3.07E-01 | 4.37E-01 |
| HLA-H    | -0.0164 | 7.53E-01 | 8.34E-01 |
| HLA-J    | 0.0589  | 2.58E-01 | 3.84E-01 |
| HLA-L    | -0.0327 | 5.30E-01 | 6.53E-01 |
| HLCS     | -0.0193 | 7.12E-01 | 8.03E-01 |
| HLF      | -0.1989 | 1.15E-04 | 6.87E-04 |
| HLTF     | 0.0739  | 1.56E-01 | 2.61E-01 |
| HLX      | -0.1114 | 3.20E-02 | 7.52E-02 |
| HM13     | 0.0920  | 7.67E-02 | 1.51E-01 |
| HMBOX1   | -0.0768 | 1.40E-01 | 2.40E-01 |
| HMBS     | 0.0057  | 9.13E-01 | 9.45E-01 |
| HMCN1    | -0.1006 | 5.28E-02 | 1.12E-01 |
| HMG20A   | -0.0989 | 5.69E-02 | 1.19E-01 |
| HMG20B   | -0.0376 | 4.70E-01 | 6.00E-01 |

|           |         |          |          |
|-----------|---------|----------|----------|
| HMGA1     | 0.3121  | 7.94E-10 | 1.93E-08 |
| HMGA2     | 0.1592  | 2.10E-03 | 8.03E-03 |
| HMGB1     | 0.1671  | 1.24E-03 | 5.15E-03 |
| HMGB2     | 0.3671  | 2.82E-13 | 1.39E-11 |
| HMGB3L1   | 0.0214  | 6.81E-01 | 7.78E-01 |
| HMGB3     | 0.0804  | 1.22E-01 | 2.17E-01 |
| HMGB4     | -0.1311 | 1.15E-02 | 3.27E-02 |
| HMGCLL1   | -0.1543 | 2.88E-03 | 1.05E-02 |
| HMGCL     | -0.3780 | 4.77E-14 | 2.71E-12 |
| HMGCR     | -0.0575 | 2.69E-01 | 3.97E-01 |
| HMGCS1    | -0.1440 | 5.47E-03 | 1.78E-02 |
| HMGCS2    | -0.1352 | 9.12E-03 | 2.72E-02 |
| HMGN1     | 0.2850  | 2.30E-08 | 3.90E-07 |
| HMGN2     | 0.2518  | 9.01E-07 | 1.03E-05 |
| HMGN3     | 0.1137  | 2.85E-02 | 6.87E-02 |
| HMGN4     | 0.2794  | 4.45E-08 | 7.06E-07 |
| HMGN5     | -0.1066 | 4.01E-02 | 9.04E-02 |
| HMGXB3    | 0.0949  | 6.78E-02 | 1.37E-01 |
| HMGXB4    | 0.2119  | 3.89E-05 | 2.73E-04 |
| HMHA1     | -0.0261 | 6.17E-01 | 7.26E-01 |
| HMHB1     | -0.0505 | 3.32E-01 | 4.63E-01 |
| HMMR      | 0.3445  | 8.87E-12 | 3.24E-10 |
| HMOX1     | -0.1144 | 2.76E-02 | 6.67E-02 |
| HMOX2     | -0.2227 | 1.50E-05 | 1.20E-04 |
| HMP19     | 0.0094  | 8.56E-01 | 9.07E-01 |
| HMSD      | 0.1152  | 2.65E-02 | 6.46E-02 |
| HMX1      | -0.0365 | 4.83E-01 | 6.11E-01 |
| HMX2      | 0.2590  | 4.21E-07 | 5.26E-06 |
| HMX3      | 0.2397  | 3.02E-06 | 2.98E-05 |
| HN1L      | 0.1240  | 1.69E-02 | 4.47E-02 |
| HN1       | 0.2762  | 6.41E-08 | 9.74E-07 |
| HNF1A     | 0.0209  | 6.88E-01 | 7.84E-01 |
| HNF1B     | 0.0914  | 7.86E-02 | 1.54E-01 |
| HNF4A     | -0.0823 | 1.14E-01 | 2.06E-01 |
| HNF4G     | 0.0162  | 7.56E-01 | 8.37E-01 |
| HNMT      | -0.2163 | 2.66E-05 | 1.97E-04 |
| HNRNPA0   | 0.2600  | 3.80E-07 | 4.81E-06 |
| HNRNPA1L2 | 0.2103  | 4.44E-05 | 3.06E-04 |
| HNRNPA1   | 0.2566  | 5.47E-07 | 6.61E-06 |
| HNRNPA2B1 | 0.3242  | 1.59E-10 | 4.50E-09 |
| HNRNPA3P1 | 0.3747  | 8.18E-14 | 4.39E-12 |
| HNRNPA3   | 0.4683  | 1.27E-21 | 3.93E-19 |
| HNRNPAB   | 0.0770  | 1.39E-01 | 2.39E-01 |
| HNRNPCL1  | 0.1030  | 4.75E-02 | 1.03E-01 |

|          |         |          |          |
|----------|---------|----------|----------|
| HNRNPC   | 0.3177  | 3.80E-10 | 9.97E-09 |
| HNRNPD   | 0.2846  | 2.41E-08 | 4.06E-07 |
| HNRNPF   | 0.0742  | 1.54E-01 | 2.59E-01 |
| HNRNPH1  | 0.3437  | 1.01E-11 | 3.56E-10 |
| HNRNPH2  | 0.0320  | 5.38E-01 | 6.60E-01 |
| HNRNPH3  | 0.2863  | 1.97E-08 | 3.41E-07 |
| HNRNPK   | 0.2526  | 8.24E-07 | 9.55E-06 |
| HNRNPL   | 0.3241  | 1.61E-10 | 4.54E-09 |
| HNRNPM   | 0.3077  | 1.42E-09 | 3.25E-08 |
| HNRNPR   | 0.1664  | 1.30E-03 | 5.36E-03 |
| HNRNPUL1 | 0.2553  | 6.21E-07 | 7.39E-06 |
| HNRNPUL2 | 0.1715  | 9.13E-04 | 3.97E-03 |
| HNRNPU   | 0.4497  | 7.22E-20 | 1.80E-17 |
| HNRPDL   | 0.3077  | 1.41E-09 | 3.25E-08 |
| HNRPLL   | 0.1035  | 4.63E-02 | 1.01E-01 |
| HOMER1   | -0.0020 | 9.70E-01 | 9.81E-01 |
| HOMER2   | -0.0989 | 5.69E-02 | 1.19E-01 |
| HOMER3   | 0.1676  | 1.19E-03 | 4.99E-03 |
| HOMEZ    | 0.1080  | 3.77E-02 | 8.59E-02 |
| HOOK1    | 0.0156  | 7.65E-01 | 8.41E-01 |
| HOOK2    | 0.1496  | 3.88E-03 | 1.34E-02 |
| HOOK3    | 0.1134  | 2.90E-02 | 6.96E-02 |
| HOPX     | -0.0255 | 6.25E-01 | 7.33E-01 |
| HORMAD1  | 0.1488  | 4.06E-03 | 1.39E-02 |
| HORMAD2  | -0.1648 | 1.45E-03 | 5.87E-03 |
| HOTAIR   | 0.1100  | 3.42E-02 | 7.95E-02 |
| HOXA10   | 0.2343  | 5.07E-06 | 4.69E-05 |
| HOXA11AS | 0.1442  | 5.38E-03 | 1.75E-02 |
| HOXA11   | 0.2222  | 1.57E-05 | 1.25E-04 |
| HOXA13   | 0.0602  | 2.48E-01 | 3.73E-01 |
| HOXA1    | 0.0054  | 9.17E-01 | 9.48E-01 |
| HOXA2    | 0.0097  | 8.52E-01 | 9.04E-01 |
| HOXA3    | 0.0523  | 3.15E-01 | 4.45E-01 |
| HOXA4    | -0.0456 | 3.81E-01 | 5.15E-01 |
| HOXA5    | 0.1222  | 1.85E-02 | 4.83E-02 |
| HOXA6    | 0.2166  | 2.57E-05 | 1.92E-04 |
| HOXA7    | -0.0758 | 1.45E-01 | 2.47E-01 |
| HOXA9    | 0.1462  | 4.78E-03 | 1.59E-02 |
| HOXB13   | 0.2267  | 1.04E-05 | 8.68E-05 |
| HOXB1    | 0.0442  | 3.96E-01 | 5.29E-01 |
| HOXB2    | -0.0907 | 8.10E-02 | 1.57E-01 |
| HOXB3    | 0.0061  | 9.06E-01 | 9.41E-01 |
| HOXB4    | -0.1204 | 2.04E-02 | 5.22E-02 |
| HOXB5    | 0.0291  | 5.77E-01 | 6.93E-01 |

|        |         |          |          |
|--------|---------|----------|----------|
| HOXB6  | 0.0314  | 5.47E-01 | 6.67E-01 |
| HOXB7  | 0.1003  | 5.35E-02 | 1.13E-01 |
| HOXB8  | 0.0653  | 2.09E-01 | 3.28E-01 |
| HOXB9  | 0.1300  | 1.22E-02 | 3.45E-02 |
| HOXC10 | 0.1197  | 2.12E-02 | 5.37E-02 |
| HOXC11 | 0.1494  | 3.91E-03 | 1.35E-02 |
| HOXC12 | 0.0509  | 3.28E-01 | 4.59E-01 |
| HOXC13 | 0.0651  | 2.11E-01 | 3.30E-01 |
| HOXC4  | 0.0846  | 1.04E-01 | 1.91E-01 |
| HOXC5  | 0.0619  | 2.34E-01 | 3.57E-01 |
| HOXC6  | 0.0904  | 8.20E-02 | 1.59E-01 |
| HOXC8  | 0.0742  | 1.54E-01 | 2.58E-01 |
| HOXC9  | 0.1363  | 8.57E-03 | 2.58E-02 |
| HOXD10 | 0.0993  | 5.60E-02 | 1.18E-01 |
| HOXD11 | 0.2014  | 9.39E-05 | 5.78E-04 |
| HOXD12 | 0.0602  | 2.48E-01 | 3.73E-01 |
| HOXD13 | 0.1106  | 3.31E-02 | 7.75E-02 |
| HOXD1  | 0.2504  | 1.03E-06 | 1.16E-05 |
| HOXD3  | 0.1839  | 3.70E-04 | 1.86E-03 |
| HOXD4  | 0.2003  | 1.03E-04 | 6.21E-04 |
| HOXD8  | 0.0122  | 8.15E-01 | 8.78E-01 |
| HOXD9  | 0.0548  | 2.92E-01 | 4.21E-01 |
| HP1BP3 | 0.1425  | 5.97E-03 | 1.91E-02 |
| HPCAL1 | -0.0556 | 2.85E-01 | 4.14E-01 |
| HPCAL4 | -0.0109 | 8.35E-01 | 8.92E-01 |
| HPCA   | 0.1563  | 2.54E-03 | 9.39E-03 |
| HPDL   | 0.2319  | 6.39E-06 | 5.72E-05 |
| HPD    | -0.3271 | 1.06E-10 | 3.10E-09 |
| HPGDS  | 0.0293  | 5.73E-01 | 6.91E-01 |
| HPGD   | -0.1389 | 7.36E-03 | 2.27E-02 |
| HPN    | -0.1733 | 8.01E-04 | 3.55E-03 |
| HPRT1  | 0.2048  | 7.06E-05 | 4.54E-04 |
| HPR    | -0.2264 | 1.06E-05 | 8.89E-05 |
| HPS1   | -0.0043 | 9.35E-01 | 9.59E-01 |
| HPS3   | 0.1645  | 1.47E-03 | 5.96E-03 |
| HPS4   | 0.2008  | 9.82E-05 | 6.00E-04 |
| HPS5   | -0.1103 | 3.37E-02 | 7.87E-02 |
| HPS6   | -0.0864 | 9.66E-02 | 1.81E-01 |
| HPSE2  | 0.1717  | 8.97E-04 | 3.92E-03 |
| HPSE   | 0.0594  | 2.54E-01 | 3.80E-01 |
| HPVC1  | -0.0316 | 5.44E-01 | 6.65E-01 |
| HPX    | -0.1954 | 1.53E-04 | 8.76E-04 |
| HPYR1  | 0.0715  | 1.69E-01 | 2.78E-01 |
| HP     | -0.2358 | 4.42E-06 | 4.18E-05 |

|          |         |          |          |
|----------|---------|----------|----------|
| HRASLS2  | 0.0170  | 7.44E-01 | 8.27E-01 |
| HRASLS5  | 0.0750  | 1.49E-01 | 2.53E-01 |
| HRASLS   | 0.0387  | 4.57E-01 | 5.88E-01 |
| HRAS     | 0.1214  | 1.93E-02 | 4.99E-02 |
| HRCT1    | 0.0116  | 8.24E-01 | 8.85E-01 |
| HRC      | -0.0899 | 8.37E-02 | 1.61E-01 |
| HRG      | -0.1250 | 1.60E-02 | 4.29E-02 |
| HRH1     | -0.0359 | 4.90E-01 | 6.18E-01 |
| HRH2     | -0.0747 | 1.51E-01 | 2.55E-01 |
| HRH3     | 0.0107  | 8.37E-01 | 8.93E-01 |
| HRH4     | -0.0865 | 9.62E-02 | 1.80E-01 |
| HRK      | 0.0928  | 7.43E-02 | 1.47E-01 |
| HRNBP3   | 0.2535  | 7.49E-07 | 8.75E-06 |
| HRNR     | 0.0281  | 5.89E-01 | 7.04E-01 |
| HRSP12   | -0.2856 | 2.15E-08 | 3.69E-07 |
| HR       | 0.0363  | 4.85E-01 | 6.13E-01 |
| HS1BP3   | -0.1070 | 3.94E-02 | 8.91E-02 |
| HS2ST1   | 0.0531  | 3.07E-01 | 4.37E-01 |
| HS3ST1   | -0.0617 | 2.35E-01 | 3.59E-01 |
| HS3ST2   | -0.2231 | 1.44E-05 | 1.16E-04 |
| HS3ST3A1 | -0.1333 | 1.01E-02 | 2.96E-02 |
| HS3ST3B1 | -0.1743 | 7.44E-04 | 3.34E-03 |
| HS3ST4   | 0.0413  | 4.28E-01 | 5.60E-01 |
| HS3ST5   | 0.0499  | 3.38E-01 | 4.69E-01 |
| HS3ST6   | 0.1777  | 5.86E-04 | 2.71E-03 |
| HS6ST1   | -0.0526 | 3.13E-01 | 4.42E-01 |
| HS6ST2   | 0.1982  | 1.21E-04 | 7.18E-04 |
| HS6ST3   | 0.0024  | 9.64E-01 | 9.78E-01 |
| HSBP1L1  | 0.0008  | 9.87E-01 | 9.92E-01 |
| HSBP1    | -0.0380 | 4.66E-01 | 5.96E-01 |
| HSCB     | -0.1278 | 1.38E-02 | 3.81E-02 |
| HSD11B1L | 0.0158  | 7.62E-01 | 8.40E-01 |
| HSD11B1  | -0.2225 | 1.52E-05 | 1.21E-04 |
| HSD11B2  | 0.0842  | 1.06E-01 | 1.94E-01 |
| HSD17B10 | -0.2009 | 9.76E-05 | 5.97E-04 |
| HSD17B11 | -0.2073 | 5.72E-05 | 3.80E-04 |
| HSD17B12 | -0.1472 | 4.50E-03 | 1.51E-02 |
| HSD17B13 | -0.1878 | 2.74E-04 | 1.44E-03 |
| HSD17B14 | -0.0128 | 8.06E-01 | 8.72E-01 |
| HSD17B1  | 0.0962  | 6.41E-02 | 1.31E-01 |
| HSD17B2  | -0.0970 | 6.20E-02 | 1.27E-01 |
| HSD17B3  | 0.0349  | 5.03E-01 | 6.28E-01 |
| HSD17B4  | -0.3017 | 3.02E-09 | 6.37E-08 |
| HSD17B6  | -0.2204 | 1.83E-05 | 1.43E-04 |

|           |         |          |          |
|-----------|---------|----------|----------|
| HSD17B7P2 | 0.1894  | 2.43E-04 | 1.30E-03 |
| HSD17B7   | 0.1753  | 6.95E-04 | 3.15E-03 |
| HSD17B8   | -0.2009 | 9.79E-05 | 5.99E-04 |
| HSD3B1    | 0.0396  | 4.47E-01 | 5.78E-01 |
| HSD3B2    | 0.0929  | 7.40E-02 | 1.47E-01 |
| HSD3B7    | -0.1066 | 4.02E-02 | 9.05E-02 |
| HSDL1     | -0.0077 | 8.82E-01 | 9.25E-01 |
| HSDL2     | -0.1731 | 8.14E-04 | 3.60E-03 |
| HSF1      | 0.0484  | 3.52E-01 | 4.84E-01 |
| HSF2BP    | 0.2374  | 3.76E-06 | 3.63E-05 |
| HSF2      | 0.3684  | 2.27E-13 | 1.13E-11 |
| HSF4      | 0.2280  | 9.16E-06 | 7.78E-05 |
| HSF5      | -0.0221 | 6.71E-01 | 7.71E-01 |
| HSFX2     | 0.1486  | 4.13E-03 | 1.41E-02 |
| HSFY2     | 0.0333  | 5.22E-01 | 6.46E-01 |
| HSFYL1    | -0.0607 | 2.43E-01 | 3.68E-01 |
| HSH2D     | 0.0262  | 6.15E-01 | 7.25E-01 |
| HSN2      | 0.0539  | 3.01E-01 | 4.30E-01 |
| HSP90AA1  | 0.0557  | 2.84E-01 | 4.13E-01 |
| HSP90AB1  | 0.1458  | 4.89E-03 | 1.62E-02 |
| HSP90AB2P | 0.1145  | 2.74E-02 | 6.64E-02 |
| HSP90AB4P | 0.1133  | 2.91E-02 | 6.98E-02 |
| HSP90B1   | 0.0243  | 6.41E-01 | 7.47E-01 |
| HSP90B3P  | 0.0590  | 2.57E-01 | 3.83E-01 |
| HSPA12A   | 0.0726  | 1.63E-01 | 2.70E-01 |
| HSPA12B   | -0.1828 | 4.00E-04 | 1.98E-03 |
| HSPA13    | 0.1695  | 1.05E-03 | 4.48E-03 |
| HSPA14    | 0.3804  | 3.21E-14 | 1.89E-12 |
| HSPA1A    | 0.1182  | 2.28E-02 | 5.71E-02 |
| HSPA1B    | 0.1356  | 8.94E-03 | 2.67E-02 |
| HSPA1L    | 0.1433  | 5.68E-03 | 1.83E-02 |
| HSPA2     | 0.0435  | 4.04E-01 | 5.37E-01 |
| HSPA4L    | -0.0322 | 5.36E-01 | 6.58E-01 |
| HSPA4     | -0.0056 | 9.14E-01 | 9.46E-01 |
| HSPA5     | 0.0909  | 8.05E-02 | 1.56E-01 |
| HSPA6     | 0.1522  | 3.29E-03 | 1.17E-02 |
| HSPA7     | 0.1405  | 6.72E-03 | 2.11E-02 |
| HSPA8     | -0.0073 | 8.89E-01 | 9.29E-01 |
| HSPA9     | -0.1892 | 2.46E-04 | 1.32E-03 |
| HSPB11    | 0.3427  | 1.16E-11 | 4.09E-10 |
| HSPB1     | 0.0816  | 1.17E-01 | 2.10E-01 |
| HSPB2     | -0.0952 | 6.70E-02 | 1.36E-01 |
| HSPB3     | 0.0958  | 6.54E-02 | 1.33E-01 |
| HSPB6     | -0.0824 | 1.13E-01 | 2.05E-01 |

|         |         |          |          |
|---------|---------|----------|----------|
| HSPB7   | -0.0363 | 4.86E-01 | 6.14E-01 |
| HSPB8   | -0.0811 | 1.19E-01 | 2.13E-01 |
| HSPB9   | 0.0616  | 2.37E-01 | 3.60E-01 |
| HSPBAP1 | 0.2277  | 9.46E-06 | 8.00E-05 |
| HSPBP1  | 0.0157  | 7.63E-01 | 8.40E-01 |
| HSPC072 | 0.1852  | 3.36E-04 | 1.72E-03 |
| HSPC157 | 0.0066  | 9.00E-01 | 9.37E-01 |
| HSPC159 | 0.0106  | 8.39E-01 | 8.94E-01 |
| HSPD1   | 0.0321  | 5.38E-01 | 6.60E-01 |
| HSPE1   | 0.0717  | 1.68E-01 | 2.77E-01 |
| HSPG2   | -0.1231 | 1.77E-02 | 4.64E-02 |
| HSPH1   | 0.1198  | 2.10E-02 | 5.35E-02 |
| HTATIP2 | -0.0115 | 8.25E-01 | 8.86E-01 |
| HTATSF1 | 0.2638  | 2.52E-07 | 3.34E-06 |
| HTA     | -0.0630 | 2.26E-01 | 3.48E-01 |
| HTN1    | 0.0590  | 2.57E-01 | 3.83E-01 |
| HTN3    | 0.0873  | 9.32E-02 | 1.76E-01 |
| HTR1A   | 0.0793  | 1.27E-01 | 2.23E-01 |
| HTR1B   | -0.0309 | 5.53E-01 | 6.73E-01 |
| HTR1D   | -0.0065 | 9.01E-01 | 9.37E-01 |
| HTR1E   | 0.0287  | 5.82E-01 | 6.98E-01 |
| HTR1F   | 0.0997  | 5.50E-02 | 1.16E-01 |
| HTR2A   | -0.0722 | 1.65E-01 | 2.73E-01 |
| HTR2B   | -0.2648 | 2.26E-07 | 3.02E-06 |
| HTR2C   | 0.0788  | 1.30E-01 | 2.27E-01 |
| HTR3A   | 0.1670  | 1.24E-03 | 5.17E-03 |
| HTR3B   | 0.1174  | 2.37E-02 | 5.90E-02 |
| HTR3C   | -0.0012 | 9.82E-01 | 9.89E-01 |
| HTR3D   | 0.0641  | 2.18E-01 | 3.38E-01 |
| HTR3E   | 0.0586  | 2.60E-01 | 3.86E-01 |
| HTR4    | 0.1465  | 4.69E-03 | 1.56E-02 |
| HTR5A   | 0.0069  | 8.95E-01 | 9.33E-01 |
| HTR6    | 0.0896  | 8.48E-02 | 1.63E-01 |
| HTR7P1  | -0.0177 | 7.34E-01 | 8.20E-01 |
| HTR7    | -0.1466 | 4.67E-03 | 1.56E-02 |
| HTRA1   | -0.2350 | 4.76E-06 | 4.46E-05 |
| HTRA2   | 0.0495  | 3.42E-01 | 4.73E-01 |
| HTRA3   | 0.0499  | 3.38E-01 | 4.69E-01 |
| HTRA4   | 0.0094  | 8.56E-01 | 9.07E-01 |
| HTT     | -0.0127 | 8.07E-01 | 8.73E-01 |
| HULC    | -0.1523 | 3.27E-03 | 1.16E-02 |
| HUNK    | 0.2271  | 9.95E-06 | 8.38E-05 |
| HUS1B   | 0.2109  | 4.25E-05 | 2.95E-04 |
| HUS1    | -0.0009 | 9.86E-01 | 9.91E-01 |



|        |         |          |          |
|--------|---------|----------|----------|
| HUWE1  | 0.1144  | 2.76E-02 | 6.67E-02 |
| HVCN1  | -0.0649 | 2.12E-01 | 3.32E-01 |
| HYAL1  | -0.4006 | 9.86E-16 | 8.01E-14 |
| HYAL2  | -0.1569 | 2.44E-03 | 9.09E-03 |
| HYAL3  | -0.0043 | 9.34E-01 | 9.59E-01 |
| HYAL4  | 0.1637  | 1.55E-03 | 6.23E-03 |
| HYDIN  | 0.0405  | 4.37E-01 | 5.68E-01 |
| HYI    | -0.1068 | 3.97E-02 | 8.96E-02 |
| HYLS1  | 0.2367  | 4.03E-06 | 3.86E-05 |
| HYMAI  | 0.1187  | 2.22E-02 | 5.59E-02 |
| HYOU1  | 0.0005  | 9.93E-01 | 9.96E-01 |
| IAH1   | -0.0513 | 3.24E-01 | 4.54E-01 |
| IAPP   | -0.0565 | 2.78E-01 | 4.06E-01 |
| IARS2  | 0.0330  | 5.26E-01 | 6.49E-01 |
| IARS   | 0.2319  | 6.37E-06 | 5.71E-05 |
| IBSP   | 0.1121  | 3.09E-02 | 7.32E-02 |
| IBTK   | 0.0549  | 2.92E-01 | 4.21E-01 |
| ICA1L  | 0.1305  | 1.18E-02 | 3.35E-02 |
| ICA1   | 0.0528  | 3.10E-01 | 4.40E-01 |
| ICAM1  | 0.0468  | 3.69E-01 | 5.02E-01 |
| ICAM2  | -0.0377 | 4.69E-01 | 5.99E-01 |
| ICAM3  | -0.2559 | 5.86E-07 | 7.02E-06 |
| ICAM4  | 0.0528  | 3.11E-01 | 4.40E-01 |
| ICAM5  | 0.0272  | 6.02E-01 | 7.14E-01 |
| ICK    | 0.0702  | 1.77E-01 | 2.88E-01 |
| ICMT   | -0.0023 | 9.65E-01 | 9.79E-01 |
| ICOSLG | -0.2386 | 3.36E-06 | 3.29E-05 |
| ICOS   | 0.0446  | 3.91E-01 | 5.24E-01 |
| ICT1   | 0.0792  | 1.28E-01 | 2.24E-01 |
| ID1    | -0.1075 | 3.84E-02 | 8.74E-02 |
| ID2B   | -0.0642 | 2.17E-01 | 3.37E-01 |
| ID2    | -0.0760 | 1.44E-01 | 2.46E-01 |
| ID3    | -0.0702 | 1.77E-01 | 2.88E-01 |
| ID4    | -0.1008 | 5.24E-02 | 1.11E-01 |
| IDE    | -0.1593 | 2.08E-03 | 7.99E-03 |
| IDH1   | -0.1692 | 1.07E-03 | 4.55E-03 |
| IDH2   | -0.1868 | 2.98E-04 | 1.55E-03 |
| IDH3A  | -0.1822 | 4.21E-04 | 2.07E-03 |
| IDH3B  | -0.0687 | 1.87E-01 | 3.00E-01 |
| IDH3G  | 0.0971  | 6.17E-02 | 1.27E-01 |
| IDI1   | -0.0675 | 1.95E-01 | 3.10E-01 |
| IDI2   | 0.1315  | 1.12E-02 | 3.21E-02 |
| IDO1   | 0.0276  | 5.96E-01 | 7.10E-01 |
| IDO2   | -0.1539 | 2.96E-03 | 1.07E-02 |

|         |         |          |          |
|---------|---------|----------|----------|
| IDS     | -0.0240 | 6.45E-01 | 7.50E-01 |
| IDUA    | 0.0667  | 2.00E-01 | 3.16E-01 |
| IER2    | -0.0459 | 3.78E-01 | 5.11E-01 |
| IER3IP1 | 0.1820  | 4.25E-04 | 2.08E-03 |
| IER3    | 0.1344  | 9.56E-03 | 2.82E-02 |
| IER5L   | 0.0355  | 4.96E-01 | 6.22E-01 |
| IER5    | 0.2880  | 1.62E-08 | 2.88E-07 |
| IFFO1   | 0.0110  | 8.32E-01 | 8.90E-01 |
| IFFO2   | 0.1823  | 4.17E-04 | 2.05E-03 |
| IFI16   | -0.0156 | 7.64E-01 | 8.41E-01 |
| IFI27L1 | 0.0646  | 2.14E-01 | 3.34E-01 |
| IFI27L2 | 0.1529  | 3.16E-03 | 1.13E-02 |
| IFI27   | -0.0966 | 6.31E-02 | 1.29E-01 |
| IFI30   | -0.0115 | 8.25E-01 | 8.85E-01 |
| IFI35   | 0.0561  | 2.81E-01 | 4.10E-01 |
| IFI44L  | -0.1002 | 5.38E-02 | 1.14E-01 |
| IFI44   | -0.0868 | 9.50E-02 | 1.79E-01 |
| IFI6    | 0.0110  | 8.32E-01 | 8.90E-01 |
| IFIH1   | 0.0513  | 3.24E-01 | 4.55E-01 |
| IFIT1B  | -0.1267 | 1.46E-02 | 3.98E-02 |
| IFIT1   | -0.1835 | 3.80E-04 | 1.90E-03 |
| IFIT2   | -0.1761 | 6.57E-04 | 3.00E-03 |
| IFIT3   | -0.1612 | 1.84E-03 | 7.19E-03 |
| IFIT5   | -0.1469 | 4.59E-03 | 1.54E-02 |
| IFITM1  | -0.1610 | 1.87E-03 | 7.27E-03 |
| IFITM2  | -0.1918 | 2.01E-04 | 1.11E-03 |
| IFITM3  | -0.0635 | 2.23E-01 | 3.44E-01 |
| IFITM4P | 0.1317  | 1.11E-02 | 3.19E-02 |
| IFITM5  | 0.0223  | 6.68E-01 | 7.68E-01 |
| IFLTD1  | -0.0042 | 9.35E-01 | 9.60E-01 |
| IFNA14  | 0.0243  | 6.40E-01 | 7.46E-01 |
| IFNA1   | 0.0410  | 4.31E-01 | 5.63E-01 |
| IFNA21  | 0.0645  | 2.15E-01 | 3.35E-01 |
| IFNA4   | 0.0836  | 1.08E-01 | 1.97E-01 |
| IFNA5   | 0.0593  | 2.55E-01 | 3.80E-01 |
| IFNA7   | 0.0579  | 2.66E-01 | 3.93E-01 |
| IFNAR1  | -0.2061 | 6.35E-05 | 4.14E-04 |
| IFNAR2  | 0.0368  | 4.80E-01 | 6.08E-01 |
| IFNB1   | 0.1074  | 3.87E-02 | 8.78E-02 |
| IFNE    | 0.1275  | 1.40E-02 | 3.86E-02 |
| IFNGR1  | -0.1257 | 1.54E-02 | 4.15E-02 |
| IFNGR2  | 0.1659  | 1.34E-03 | 5.51E-03 |
| IFNG    | 0.0258  | 6.21E-01 | 7.30E-01 |
| IFNK    | -0.0318 | 5.41E-01 | 6.62E-01 |

|         |         |          |          |
|---------|---------|----------|----------|
| IFNW1   | 0.0365  | 4.83E-01 | 6.11E-01 |
| IFRD1   | 0.1586  | 2.19E-03 | 8.31E-03 |
| IFRD2   | 0.0079  | 8.79E-01 | 9.23E-01 |
| IFT122  | 0.0124  | 8.11E-01 | 8.76E-01 |
| IFT140  | 0.1491  | 4.00E-03 | 1.37E-02 |
| IFT172  | 0.1877  | 2.78E-04 | 1.46E-03 |
| IFT20   | 0.1319  | 1.10E-02 | 3.16E-02 |
| IFT27   | 0.1054  | 4.25E-02 | 9.45E-02 |
| IFT46   | -0.1015 | 5.08E-02 | 1.09E-01 |
| IFT52   | 0.2820  | 3.27E-08 | 5.33E-07 |
| IFT57   | 0.1272  | 1.42E-02 | 3.90E-02 |
| IFT74   | 0.1909  | 2.17E-04 | 1.18E-03 |
| IFT80   | 0.2352  | 4.66E-06 | 4.38E-05 |
| IFT81   | 0.2188  | 2.11E-05 | 1.62E-04 |
| IFT88   | -0.0160 | 7.58E-01 | 8.38E-01 |
| IGBP1   | 0.1062  | 4.10E-02 | 9.19E-02 |
| IGDCC3  | 0.1025  | 4.84E-02 | 1.05E-01 |
| IGDCC4  | 0.1266  | 1.47E-02 | 4.00E-02 |
| IGF1R   | 0.0675  | 1.94E-01 | 3.10E-01 |
| IGF1    | -0.2314 | 6.67E-06 | 5.94E-05 |
| IGF2AS  | 0.0843  | 1.05E-01 | 1.93E-01 |
| IGF2BP1 | 0.2776  | 5.42E-08 | 8.36E-07 |
| IGF2BP2 | 0.2005  | 1.01E-04 | 6.14E-04 |
| IGF2BP3 | 0.2096  | 4.74E-05 | 3.23E-04 |
| IGF2R   | 0.1084  | 3.69E-02 | 8.45E-02 |
| IGF2    | 0.0238  | 6.48E-01 | 7.52E-01 |
| IGFALS  | -0.0431 | 4.08E-01 | 5.41E-01 |
| IGFBP1  | -0.1538 | 2.98E-03 | 1.07E-02 |
| IGFBP2  | -0.1408 | 6.62E-03 | 2.08E-02 |
| IGFBP3  | 0.0767  | 1.40E-01 | 2.41E-01 |
| IGFBP4  | -0.2137 | 3.31E-05 | 2.38E-04 |
| IGFBP5  | -0.1620 | 1.75E-03 | 6.88E-03 |
| IGFBP6  | -0.0476 | 3.60E-01 | 4.92E-01 |
| IGFBP7  | -0.1912 | 2.12E-04 | 1.16E-03 |
| IGFBPL1 | 0.1734  | 7.99E-04 | 3.55E-03 |
| IGFL1   | 0.0705  | 1.75E-01 | 2.86E-01 |
| IGFL2   | 0.1221  | 1.86E-02 | 4.85E-02 |
| IGFL3   | 0.0179  | 7.31E-01 | 8.18E-01 |
| IGFL4   | 0.0720  | 1.67E-01 | 2.75E-01 |
| IGFN1   | -0.0206 | 6.92E-01 | 7.87E-01 |
| IGHMBP2 | 0.1130  | 2.95E-02 | 7.05E-02 |
| IGJ     | -0.0974 | 6.10E-02 | 1.26E-01 |
| IGLL1   | 0.0452  | 3.85E-01 | 5.19E-01 |
| IGLL3   | 0.1563  | 2.54E-03 | 9.38E-03 |

|         |         |          |          |
|---------|---------|----------|----------|
| IGLON5  | 0.0159  | 7.60E-01 | 8.39E-01 |
| IGSF10  | -0.1404 | 6.76E-03 | 2.11E-02 |
| IGSF11  | 0.0468  | 3.69E-01 | 5.02E-01 |
| IGSF1   | 0.2206  | 1.81E-05 | 1.42E-04 |
| IGSF21  | -0.0977 | 6.01E-02 | 1.24E-01 |
| IGSF22  | 0.0958  | 6.52E-02 | 1.33E-01 |
| IGSF3   | 0.1983  | 1.21E-04 | 7.16E-04 |
| IGSF5   | 0.0682  | 1.90E-01 | 3.04E-01 |
| IGSF6   | -0.0750 | 1.49E-01 | 2.53E-01 |
| IGSF8   | 0.1317  | 1.11E-02 | 3.18E-02 |
| IGSF9B  | -0.0787 | 1.30E-01 | 2.27E-01 |
| IGSF9   | 0.0038  | 9.43E-01 | 9.64E-01 |
| IHH     | 0.0603  | 2.47E-01 | 3.72E-01 |
| IKBIP   | 0.0629  | 2.27E-01 | 3.49E-01 |
| IKBKAP  | 0.2141  | 3.21E-05 | 2.32E-04 |
| IKBKB   | 0.1295  | 1.26E-02 | 3.52E-02 |
| IKBKE   | 0.2484  | 1.27E-06 | 1.40E-05 |
| IKBKG   | 0.0589  | 2.58E-01 | 3.84E-01 |
| IKZF1   | -0.1032 | 4.70E-02 | 1.02E-01 |
| IKZF2   | -0.1272 | 1.42E-02 | 3.90E-02 |
| IKZF3   | -0.1162 | 2.52E-02 | 6.19E-02 |
| IKZF4   | 0.0670  | 1.98E-01 | 3.14E-01 |
| IKZF5   | -0.0222 | 6.70E-01 | 7.69E-01 |
| IK      | 0.1895  | 2.41E-04 | 1.29E-03 |
| IL10RA  | -0.1068 | 3.98E-02 | 8.98E-02 |
| IL10RB  | 0.0536  | 3.03E-01 | 4.33E-01 |
| IL10    | -0.1130 | 2.96E-02 | 7.07E-02 |
| IL11RA  | 0.1574  | 2.36E-03 | 8.82E-03 |
| IL11    | 0.1984  | 1.20E-04 | 7.11E-04 |
| IL12A   | 0.2826  | 3.05E-08 | 5.02E-07 |
| IL12B   | -0.0049 | 9.25E-01 | 9.52E-01 |
| IL12RB1 | -0.0391 | 4.52E-01 | 5.84E-01 |
| IL12RB2 | -0.0897 | 8.44E-02 | 1.62E-01 |
| IL13RA1 | -0.1269 | 1.45E-02 | 3.96E-02 |
| IL13RA2 | 0.0047  | 9.29E-01 | 9.55E-01 |
| IL13    | 0.0852  | 1.01E-01 | 1.88E-01 |
| IL15RA  | 0.0415  | 4.25E-01 | 5.58E-01 |
| IL15    | -0.0217 | 6.77E-01 | 7.75E-01 |
| IL16    | -0.0788 | 1.30E-01 | 2.27E-01 |
| IL17A   | -0.0818 | 1.16E-01 | 2.09E-01 |
| IL17B   | -0.0072 | 8.91E-01 | 9.30E-01 |
| IL17C   | 0.0582  | 2.64E-01 | 3.90E-01 |
| IL17D   | 0.0683  | 1.90E-01 | 3.03E-01 |
| IL17F   | 0.1412  | 6.43E-03 | 2.03E-02 |

|          |         |          |          |
|----------|---------|----------|----------|
| IL17RA   | -0.0309 | 5.53E-01 | 6.73E-01 |
| IL17RB   | 0.1995  | 1.09E-04 | 6.56E-04 |
| IL17RC   | -0.1714 | 9.19E-04 | 4.00E-03 |
| IL17RD   | 0.0300  | 5.64E-01 | 6.82E-01 |
| IL17REL  | 0.1255  | 1.56E-02 | 4.19E-02 |
| IL17RE   | 0.1198  | 2.10E-02 | 5.34E-02 |
| IL18BP   | -0.0477 | 3.60E-01 | 4.92E-01 |
| IL18R1   | -0.0952 | 6.71E-02 | 1.36E-01 |
| IL18RAP  | -0.0595 | 2.53E-01 | 3.78E-01 |
| IL18     | -0.0520 | 3.18E-01 | 4.48E-01 |
| IL19     | 0.0159  | 7.60E-01 | 8.38E-01 |
| IL1A     | 0.0974  | 6.08E-02 | 1.26E-01 |
| IL1B     | -0.0030 | 9.55E-01 | 9.72E-01 |
| IL1F10   | 0.0537  | 3.02E-01 | 4.31E-01 |
| IL1F5    | -0.0539 | 3.01E-01 | 4.30E-01 |
| IL1F6    | 0.0096  | 8.54E-01 | 9.06E-01 |
| IL1F7    | 0.1959  | 1.46E-04 | 8.45E-04 |
| IL1F8    | -0.0135 | 7.96E-01 | 8.65E-01 |
| IL1F9    | 0.0876  | 9.20E-02 | 1.74E-01 |
| IL1R1    | -0.2139 | 3.25E-05 | 2.34E-04 |
| IL1R2    | -0.0393 | 4.50E-01 | 5.82E-01 |
| IL1RAPL1 | 0.0348  | 5.04E-01 | 6.29E-01 |
| IL1RAPL2 | -0.0826 | 1.12E-01 | 2.03E-01 |
| IL1RAP   | 0.0233  | 6.55E-01 | 7.57E-01 |
| IL1RL1   | -0.2949 | 7.01E-09 | 1.35E-07 |
| IL1RL2   | -0.0116 | 8.24E-01 | 8.85E-01 |
| IL1RN    | -0.0916 | 7.80E-02 | 1.53E-01 |
| IL20RA   | 0.2003  | 1.02E-04 | 6.21E-04 |
| IL20RB   | 0.0407  | 4.34E-01 | 5.66E-01 |
| IL20     | -0.0095 | 8.55E-01 | 9.06E-01 |
| IL21R    | 0.0577  | 2.67E-01 | 3.95E-01 |
| IL21     | -0.0689 | 1.85E-01 | 2.98E-01 |
| IL22RA1  | 0.1145  | 2.74E-02 | 6.63E-02 |
| IL22RA2  | 0.0569  | 2.75E-01 | 4.03E-01 |
| IL22     | 0.0039  | 9.41E-01 | 9.64E-01 |
| IL23A    | -0.0041 | 9.37E-01 | 9.60E-01 |
| IL23R    | -0.0386 | 4.59E-01 | 5.89E-01 |
| IL24     | -0.0261 | 6.17E-01 | 7.26E-01 |
| IL25     | -0.0364 | 4.85E-01 | 6.13E-01 |
| IL26     | 0.0218  | 6.76E-01 | 7.74E-01 |
| IL27RA   | 0.1352  | 9.10E-03 | 2.71E-02 |
| IL27     | -0.0969 | 6.23E-02 | 1.28E-01 |
| IL28A    | 0.0888  | 8.76E-02 | 1.67E-01 |
| IL28B    | 0.0437  | 4.01E-01 | 5.34E-01 |

|        |         |          |          |
|--------|---------|----------|----------|
| IL28RA | -0.0252 | 6.28E-01 | 7.36E-01 |
| IL29   | 0.0220  | 6.73E-01 | 7.72E-01 |
| IL2RA  | -0.0091 | 8.62E-01 | 9.11E-01 |
| IL2RB  | -0.0896 | 8.47E-02 | 1.63E-01 |
| IL2RG  | 0.0536  | 3.04E-01 | 4.33E-01 |
| IL2    | -0.0023 | 9.64E-01 | 9.78E-01 |
| IL31RA | 0.0109  | 8.35E-01 | 8.92E-01 |
| IL31   | 0.0787  | 1.30E-01 | 2.28E-01 |
| IL32   | -0.0737 | 1.56E-01 | 2.62E-01 |
| IL33   | -0.1625 | 1.69E-03 | 6.70E-03 |
| IL34   | -0.0008 | 9.88E-01 | 9.93E-01 |
| IL3RA  | -0.0734 | 1.58E-01 | 2.64E-01 |
| IL3    | 0.0196  | 7.07E-01 | 7.99E-01 |
| IL4I1  | 0.1470  | 4.55E-03 | 1.53E-02 |
| IL4R   | 0.0623  | 2.31E-01 | 3.54E-01 |
| IL4    | 0.1746  | 7.31E-04 | 3.29E-03 |
| IL5RA  | -0.1376 | 7.96E-03 | 2.42E-02 |
| IL5    | 0.0458  | 3.79E-01 | 5.13E-01 |
| IL6R   | -0.0216 | 6.78E-01 | 7.76E-01 |
| IL6ST  | -0.1461 | 4.81E-03 | 1.60E-02 |
| IL6    | -0.1487 | 4.11E-03 | 1.41E-02 |
| IL7R   | -0.1594 | 2.07E-03 | 7.94E-03 |
| IL7    | -0.0818 | 1.16E-01 | 2.08E-01 |
| IL8    | 0.0886  | 8.83E-02 | 1.68E-01 |
| IL9R   | 0.0679  | 1.92E-01 | 3.06E-01 |
| IL9    | 0.0913  | 7.90E-02 | 1.54E-01 |
| ILD1R  | 0.1917  | 2.04E-04 | 1.12E-03 |
| ILD2R  | 0.1144  | 2.75E-02 | 6.66E-02 |
| ILF2   | 0.5509  | 7.82E-31 | 8.65E-28 |
| ILF3   | 0.3599  | 8.68E-13 | 3.92E-11 |
| ILKAP  | 0.2323  | 6.16E-06 | 5.54E-05 |
| ILK    | -0.0362 | 4.87E-01 | 6.14E-01 |
| ILVBL  | -0.2083 | 5.28E-05 | 3.55E-04 |
| IMM1L  | 0.2302  | 7.47E-06 | 6.52E-05 |
| IMM2L  | -0.1924 | 1.93E-04 | 1.07E-03 |
| IMMT   | -0.1161 | 2.53E-02 | 6.21E-02 |
| IMP3   | -0.1026 | 4.83E-02 | 1.05E-01 |
| IMP4   | -0.0761 | 1.43E-01 | 2.45E-01 |
| IMP5   | 0.0083  | 8.73E-01 | 9.18E-01 |
| IMPA1  | -0.0922 | 7.60E-02 | 1.50E-01 |
| IMPA2  | 0.0959  | 6.49E-02 | 1.32E-01 |
| IMPACT | -0.1408 | 6.61E-03 | 2.08E-02 |
| IMPAD1 | -0.2232 | 1.43E-05 | 1.16E-04 |
| IMPDH1 | 0.1041  | 4.51E-02 | 9.91E-02 |

|          |         |          |          |
|----------|---------|----------|----------|
| IMPDH2   | 0.0648  | 2.13E-01 | 3.33E-01 |
| IMPG1    | 0.1133  | 2.92E-02 | 6.99E-02 |
| IMPG2    | -0.0488 | 3.48E-01 | 4.80E-01 |
| INADL    | 0.0675  | 1.95E-01 | 3.10E-01 |
| INA      | -0.0724 | 1.64E-01 | 2.71E-01 |
| INCA1    | -0.1333 | 1.02E-02 | 2.96E-02 |
| INCENP   | 0.2339  | 5.30E-06 | 4.87E-05 |
| INE1     | 0.0815  | 1.17E-01 | 2.11E-01 |
| INE2     | 0.0379  | 4.66E-01 | 5.96E-01 |
| INF2     | 0.0109  | 8.35E-01 | 8.92E-01 |
| ING1     | 0.0119  | 8.19E-01 | 8.81E-01 |
| ING2     | -0.0134 | 7.97E-01 | 8.65E-01 |
| ING3     | -0.0213 | 6.82E-01 | 7.79E-01 |
| ING4     | 0.0363  | 4.86E-01 | 6.14E-01 |
| ING5     | 0.2900  | 1.28E-08 | 2.32E-07 |
| INGX     | 0.0882  | 8.97E-02 | 1.71E-01 |
| INHA     | 0.0963  | 6.40E-02 | 1.31E-01 |
| INHBA    | -0.2109 | 4.23E-05 | 2.94E-04 |
| INHBB    | -0.0068 | 8.96E-01 | 9.34E-01 |
| INHBC    | -0.0955 | 6.61E-02 | 1.34E-01 |
| INHBE    | -0.0408 | 4.34E-01 | 5.65E-01 |
| INMT     | -0.1858 | 3.22E-04 | 1.66E-03 |
| INO80B   | -0.1142 | 2.78E-02 | 6.73E-02 |
| INO80C   | 0.1347  | 9.37E-03 | 2.78E-02 |
| INO80D   | 0.1558  | 2.62E-03 | 9.64E-03 |
| INO80E   | 0.1670  | 1.24E-03 | 5.16E-03 |
| INO80    | 0.0301  | 5.63E-01 | 6.81E-01 |
| INPP1    | -0.1241 | 1.68E-02 | 4.45E-02 |
| INPP4A   | 0.1831  | 3.92E-04 | 1.95E-03 |
| INPP4B   | -0.1198 | 2.10E-02 | 5.35E-02 |
| INPP5A   | 0.0209  | 6.88E-01 | 7.84E-01 |
| INPP5B   | -0.1109 | 3.27E-02 | 7.67E-02 |
| INPP5D   | -0.1062 | 4.09E-02 | 9.18E-02 |
| INPP5E   | 0.1950  | 1.57E-04 | 8.97E-04 |
| INPP5F   | 0.1169  | 2.43E-02 | 6.02E-02 |
| INPP5J   | 0.2157  | 2.78E-05 | 2.05E-04 |
| INPP5K   | -0.0446 | 3.91E-01 | 5.24E-01 |
| INPPL1   | 0.0899  | 8.37E-02 | 1.61E-01 |
| INS-IGF2 | -0.1820 | 4.27E-04 | 2.08E-03 |
| INSC     | 0.0049  | 9.25E-01 | 9.52E-01 |
| INSIG1   | -0.2069 | 5.95E-05 | 3.92E-04 |
| INSIG2   | -0.0947 | 6.84E-02 | 1.38E-01 |
| INSL3    | 0.0640  | 2.19E-01 | 3.39E-01 |
| INSL4    | -0.0487 | 3.50E-01 | 4.82E-01 |

|         |         |          |          |
|---------|---------|----------|----------|
| INSL5   | -0.0280 | 5.91E-01 | 7.05E-01 |
| INSL6   | 0.1276  | 1.39E-02 | 3.84E-02 |
| INSM1   | 0.0642  | 2.17E-01 | 3.38E-01 |
| INSM2   | 0.0332  | 5.24E-01 | 6.47E-01 |
| INSRR   | 0.1459  | 4.86E-03 | 1.61E-02 |
| INSR    | -0.2037 | 7.77E-05 | 4.93E-04 |
| INS     | -0.0663 | 2.02E-01 | 3.20E-01 |
| INTS10  | -0.0787 | 1.30E-01 | 2.27E-01 |
| INTS12  | -0.0716 | 1.69E-01 | 2.78E-01 |
| INTS1   | 0.0638  | 2.20E-01 | 3.41E-01 |
| INTS2   | 0.1279  | 1.37E-02 | 3.78E-02 |
| INTS3   | 0.5199  | 4.47E-27 | 3.07E-24 |
| INTS4L1 | 0.0932  | 7.30E-02 | 1.45E-01 |
| INTS4L2 | 0.0605  | 2.45E-01 | 3.69E-01 |
| INTS4   | 0.2969  | 5.48E-09 | 1.09E-07 |
| INTS5   | -0.1455 | 4.98E-03 | 1.64E-02 |
| INTS6   | -0.0327 | 5.30E-01 | 6.53E-01 |
| INTS7   | 0.3909  | 5.41E-15 | 3.70E-13 |
| INTS8   | 0.3641  | 4.49E-13 | 2.14E-11 |
| INTS9   | 0.0382  | 4.63E-01 | 5.94E-01 |
| INTU    | 0.2413  | 2.57E-06 | 2.59E-05 |
| INVS    | 0.0788  | 1.30E-01 | 2.27E-01 |
| IP6K1   | 0.2490  | 1.19E-06 | 1.32E-05 |
| IP6K2   | 0.1760  | 6.62E-04 | 3.02E-03 |
| IP6K3   | 0.0071  | 8.92E-01 | 9.31E-01 |
| IPCEF1  | -0.0713 | 1.70E-01 | 2.80E-01 |
| IPMK    | -0.0133 | 7.99E-01 | 8.67E-01 |
| IPO11   | -0.0197 | 7.05E-01 | 7.97E-01 |
| IPO13   | 0.0262  | 6.14E-01 | 7.25E-01 |
| IPO4    | -0.0402 | 4.40E-01 | 5.72E-01 |
| IPO5    | 0.2003  | 1.03E-04 | 6.21E-04 |
| IPO7    | 0.0653  | 2.09E-01 | 3.28E-01 |
| IPO8    | 0.0419  | 4.21E-01 | 5.54E-01 |
| IPO9    | 0.4264  | 8.09E-18 | 1.11E-15 |
| IPPK    | 0.1069  | 3.96E-02 | 8.95E-02 |
| IPP     | -0.0466 | 3.71E-01 | 5.04E-01 |
| IPW     | 0.0625  | 2.30E-01 | 3.53E-01 |
| IQCA1   | -0.0070 | 8.93E-01 | 9.32E-01 |
| IQCB1   | 0.3956  | 2.41E-15 | 1.77E-13 |
| IQCC    | 0.3869  | 1.07E-14 | 6.86E-13 |
| IQCD    | 0.2602  | 3.72E-07 | 4.72E-06 |
| IQCE    | 0.1895  | 2.41E-04 | 1.29E-03 |
| IQCF1   | 0.1886  | 2.59E-04 | 1.37E-03 |
| IQCF2   | 0.0120  | 8.17E-01 | 8.80E-01 |



|          |         |          |          |
|----------|---------|----------|----------|
| IQCF3    | 0.1389  | 7.38E-03 | 2.27E-02 |
| IQCF5    | 0.0320  | 5.39E-01 | 6.61E-01 |
| IQCF6    | 0.0690  | 1.85E-01 | 2.98E-01 |
| IQCG     | 0.0564  | 2.79E-01 | 4.07E-01 |
| IQCH     | -0.0699 | 1.79E-01 | 2.90E-01 |
| IQCJ     | 0.1018  | 5.02E-02 | 1.08E-01 |
| IQCK     | 0.0535  | 3.04E-01 | 4.34E-01 |
| IQGAP1   | 0.0227  | 6.63E-01 | 7.64E-01 |
| IQGAP2   | -0.2133 | 3.44E-05 | 2.47E-04 |
| IQGAP3   | 0.4754  | 2.55E-22 | 9.25E-20 |
| IQSEC1   | -0.0480 | 3.57E-01 | 4.89E-01 |
| IQSEC2   | -0.0021 | 9.67E-01 | 9.80E-01 |
| IQSEC3   | -0.1307 | 1.18E-02 | 3.33E-02 |
| IQUB     | 0.0231  | 6.57E-01 | 7.59E-01 |
| IRAK1BP1 | 0.2273  | 9.79E-06 | 8.26E-05 |
| IRAK1    | 0.1978  | 1.26E-04 | 7.43E-04 |
| IRAK2    | 0.0332  | 5.24E-01 | 6.47E-01 |
| IRAK3    | -0.1178 | 2.33E-02 | 5.81E-02 |
| IRAK4    | 0.0398  | 4.45E-01 | 5.77E-01 |
| IREB2    | -0.0424 | 4.15E-01 | 5.48E-01 |
| IRF1     | 0.0959  | 6.50E-02 | 1.32E-01 |
| IRF2BP1  | 0.1429  | 5.82E-03 | 1.87E-02 |
| IRF2BP2  | 0.2875  | 1.73E-08 | 3.04E-07 |
| IRF2     | -0.1496 | 3.88E-03 | 1.34E-02 |
| IRF3     | 0.1968  | 1.37E-04 | 7.96E-04 |
| IRF4     | -0.0169 | 7.46E-01 | 8.28E-01 |
| IRF5     | 0.1259  | 1.53E-02 | 4.13E-02 |
| IRF6     | -0.0319 | 5.40E-01 | 6.62E-01 |
| IRF7     | 0.0149  | 7.74E-01 | 8.49E-01 |
| IRF8     | 0.0035  | 9.46E-01 | 9.67E-01 |
| IRF9     | -0.0427 | 4.12E-01 | 5.45E-01 |
| IRGC     | 0.1095  | 3.49E-02 | 8.09E-02 |
| IRGM     | -0.0438 | 4.00E-01 | 5.33E-01 |
| IRGQ     | 0.1207  | 2.01E-02 | 5.15E-02 |
| IRS1     | -0.1272 | 1.42E-02 | 3.89E-02 |
| IRS2     | -0.0766 | 1.41E-01 | 2.42E-01 |
| IRS4     | -0.0195 | 7.08E-01 | 8.00E-01 |
| IRX1     | 0.0016  | 9.75E-01 | 9.84E-01 |
| IRX2     | -0.0318 | 5.41E-01 | 6.62E-01 |
| IRX3     | 0.0414  | 4.27E-01 | 5.59E-01 |
| IRX4     | -0.0483 | 3.53E-01 | 4.85E-01 |
| IRX5     | 0.0593  | 2.54E-01 | 3.80E-01 |
| IRX6     | -0.0016 | 9.75E-01 | 9.84E-01 |
| ISCA1P1  | -0.0321 | 5.37E-01 | 6.59E-01 |

|          |         |          |          |
|----------|---------|----------|----------|
| ISCA1    | -0.0218 | 6.75E-01 | 7.74E-01 |
| ISCA2    | -0.0595 | 2.53E-01 | 3.78E-01 |
| ISCU     | -0.2480 | 1.32E-06 | 1.44E-05 |
| ISG15    | -0.0634 | 2.23E-01 | 3.44E-01 |
| ISG20L2  | 0.4463  | 1.46E-19 | 3.30E-17 |
| ISG20    | -0.0131 | 8.01E-01 | 8.69E-01 |
| ISL1     | 0.1468  | 4.61E-03 | 1.54E-02 |
| ISL2     | 0.2121  | 3.81E-05 | 2.69E-04 |
| ISLR2    | -0.1443 | 5.37E-03 | 1.75E-02 |
| ISLR     | -0.0558 | 2.83E-01 | 4.12E-01 |
| ISM1     | -0.1534 | 3.06E-03 | 1.10E-02 |
| ISM2     | 0.1307  | 1.17E-02 | 3.33E-02 |
| ISOC1    | -0.2014 | 9.38E-05 | 5.78E-04 |
| ISOC2    | -0.2512 | 9.54E-07 | 1.09E-05 |
| ISPD     | -0.2404 | 2.82E-06 | 2.81E-05 |
| ISX      | 0.0610  | 2.41E-01 | 3.66E-01 |
| ISY1     | 0.2441  | 1.96E-06 | 2.06E-05 |
| ISYNA1   | 0.0704  | 1.76E-01 | 2.87E-01 |
| ITCH     | -0.1243 | 1.66E-02 | 4.42E-02 |
| ITFG1    | -0.3427 | 1.15E-11 | 4.06E-10 |
| ITFG2    | 0.2419  | 2.43E-06 | 2.47E-05 |
| ITFG3    | -0.0358 | 4.92E-01 | 6.19E-01 |
| ITGA10   | -0.0595 | 2.53E-01 | 3.78E-01 |
| ITGA11   | -0.0709 | 1.73E-01 | 2.83E-01 |
| ITGA1    | -0.2372 | 3.84E-06 | 3.70E-05 |
| ITGA2B   | 0.0367  | 4.81E-01 | 6.09E-01 |
| ITGA2    | 0.0602  | 2.48E-01 | 3.73E-01 |
| ITGA3    | 0.0242  | 6.42E-01 | 7.48E-01 |
| ITGA4    | -0.0635 | 2.22E-01 | 3.43E-01 |
| ITGA5    | 0.1538  | 2.97E-03 | 1.07E-02 |
| ITGA6    | 0.0157  | 7.62E-01 | 8.40E-01 |
| ITGA7    | -0.1262 | 1.50E-02 | 4.08E-02 |
| ITGA8    | -0.1496 | 3.87E-03 | 1.34E-02 |
| ITGA9    | -0.1841 | 3.65E-04 | 1.84E-03 |
| ITGAD    | -0.0974 | 6.09E-02 | 1.26E-01 |
| ITGAE    | 0.1272  | 1.42E-02 | 3.90E-02 |
| ITGAL    | 0.0416  | 4.24E-01 | 5.57E-01 |
| ITGAM    | 0.0447  | 3.91E-01 | 5.24E-01 |
| ITGAV    | 0.0462  | 3.75E-01 | 5.08E-01 |
| ITGAX    | -0.0245 | 6.39E-01 | 7.45E-01 |
| ITGB1BP1 | 0.1903  | 2.28E-04 | 1.23E-03 |
| ITGB1BP2 | 0.0462  | 3.75E-01 | 5.09E-01 |
| ITGB1BP3 | -0.1261 | 1.50E-02 | 4.08E-02 |
| ITGB1    | -0.0596 | 2.52E-01 | 3.77E-01 |

|          |         |          |          |
|----------|---------|----------|----------|
| ITGB2    | -0.0699 | 1.79E-01 | 2.91E-01 |
| ITGB3BP  | 0.3489  | 4.62E-12 | 1.80E-10 |
| ITGB3    | -0.0751 | 1.49E-01 | 2.53E-01 |
| ITGB4    | 0.0853  | 1.01E-01 | 1.87E-01 |
| ITGB5    | 0.0306  | 5.56E-01 | 6.75E-01 |
| ITGB6    | 0.1048  | 4.37E-02 | 9.67E-02 |
| ITGB7    | -0.0473 | 3.63E-01 | 4.96E-01 |
| ITGB8    | 0.0771  | 1.38E-01 | 2.38E-01 |
| ITGBL1   | -0.0824 | 1.13E-01 | 2.05E-01 |
| ITIH1    | -0.1199 | 2.09E-02 | 5.33E-02 |
| ITIH2    | -0.0831 | 1.10E-01 | 2.00E-01 |
| ITIH3    | -0.0799 | 1.24E-01 | 2.20E-01 |
| ITIH4    | -0.2428 | 2.23E-06 | 2.29E-05 |
| ITIH5L   | 0.0684  | 1.89E-01 | 3.02E-01 |
| ITIH5    | 0.0957  | 6.56E-02 | 1.33E-01 |
| ITK      | -0.1119 | 3.12E-02 | 7.37E-02 |
| ITLN1    | 0.1058  | 4.16E-02 | 9.29E-02 |
| ITLN2    | 0.0532  | 3.07E-01 | 4.37E-01 |
| ITM2A    | -0.1161 | 2.54E-02 | 6.22E-02 |
| ITM2B    | -0.1952 | 1.55E-04 | 8.86E-04 |
| ITM2C    | 0.1428  | 5.85E-03 | 1.88E-02 |
| ITPA     | 0.0333  | 5.23E-01 | 6.47E-01 |
| ITPK1    | -0.0930 | 7.37E-02 | 1.46E-01 |
| ITPKA    | 0.1896  | 2.41E-04 | 1.29E-03 |
| ITPKB    | -0.1444 | 5.32E-03 | 1.74E-02 |
| ITPKC    | 0.0123  | 8.14E-01 | 8.77E-01 |
| ITPR1    | -0.1423 | 6.02E-03 | 1.92E-02 |
| ITPR2    | -0.1698 | 1.02E-03 | 4.38E-03 |
| ITPR3    | 0.1960  | 1.45E-04 | 8.38E-04 |
| ITPRIPL1 | 0.0480  | 3.56E-01 | 4.88E-01 |
| ITPRIPL2 | 0.0835  | 1.08E-01 | 1.98E-01 |
| ITPRIP   | -0.3103 | 1.01E-09 | 2.39E-08 |
| ITSN1    | -0.0109 | 8.35E-01 | 8.92E-01 |
| ITSN2    | 0.0031  | 9.52E-01 | 9.70E-01 |
| IVD      | -0.3959 | 2.25E-15 | 1.67E-13 |
| IVL      | -0.0523 | 3.15E-01 | 4.45E-01 |
| IVNS1ABP | 0.2112  | 4.14E-05 | 2.88E-04 |
| IWS1     | 0.0745  | 1.52E-01 | 2.56E-01 |
| IYD      | -0.1978 | 1.25E-04 | 7.39E-04 |
| IZUMO1   | 0.2070  | 5.87E-05 | 3.88E-04 |
| JAG1     | 0.0403  | 4.39E-01 | 5.70E-01 |
| JAG2     | -0.0123 | 8.14E-01 | 8.77E-01 |
| JAGN1    | 0.0044  | 9.33E-01 | 9.58E-01 |
| JAK1     | -0.1552 | 2.73E-03 | 9.98E-03 |

|              |         |          |          |
|--------------|---------|----------|----------|
| JAK2         | 0.0253  | 6.28E-01 | 7.36E-01 |
| JAK3         | 0.0143  | 7.83E-01 | 8.56E-01 |
| JAKMIP1      | -0.0139 | 7.89E-01 | 8.60E-01 |
| JAKMIP2      | -0.1527 | 3.18E-03 | 1.14E-02 |
| JAKMIP3      | 0.2105  | 4.38E-05 | 3.03E-04 |
| JAM2         | -0.1850 | 3.42E-04 | 1.74E-03 |
| JAM3         | -0.1207 | 2.01E-02 | 5.15E-02 |
| JARID2       | 0.1527  | 3.19E-03 | 1.14E-02 |
| JAZF1        | -0.1118 | 3.13E-02 | 7.40E-02 |
| JDP2         | -0.2307 | 7.12E-06 | 6.26E-05 |
| JHDM1D       | -0.0704 | 1.76E-01 | 2.87E-01 |
| JKAMP        | -0.0326 | 5.31E-01 | 6.54E-01 |
| JMJD1C       | -0.0923 | 7.56E-02 | 1.49E-01 |
| JMJD4        | 0.1472  | 4.50E-03 | 1.51E-02 |
| JMJD5        | -0.2074 | 5.69E-05 | 3.78E-04 |
| JMJD6        | 0.3212  | 2.39E-10 | 6.55E-09 |
| JMJD7-PLA2G4 | 0.0964  | 6.36E-02 | 1.30E-01 |
| JMJD8        | -0.1803 | 4.84E-04 | 2.31E-03 |
| JMY          | -0.1135 | 2.88E-02 | 6.93E-02 |
| JOSD1        | 0.2141  | 3.21E-05 | 2.32E-04 |
| JOSD2        | 0.0112  | 8.30E-01 | 8.89E-01 |
| JPH1         | 0.0827  | 1.12E-01 | 2.03E-01 |
| JPH2         | -0.0604 | 2.46E-01 | 3.70E-01 |
| JPH3         | -0.0901 | 8.31E-02 | 1.60E-01 |
| JPH4         | -0.0919 | 7.72E-02 | 1.51E-01 |
| JRKL         | 0.2510  | 9.75E-07 | 1.11E-05 |
| JRK          | 0.3209  | 2.48E-10 | 6.78E-09 |
| JSRP1        | 0.0698  | 1.80E-01 | 2.91E-01 |
| JTB          | 0.3409  | 1.51E-11 | 5.21E-10 |
| JUB          | -0.0421 | 4.19E-01 | 5.52E-01 |
| JUNB         | -0.0270 | 6.04E-01 | 7.16E-01 |
| JUND         | -0.1105 | 3.33E-02 | 7.78E-02 |
| JUN          | -0.0780 | 1.34E-01 | 2.32E-01 |
| JUP          | 0.0776  | 1.36E-01 | 2.35E-01 |
| KAAG1        | 0.1237  | 1.71E-02 | 4.53E-02 |
| KAL1         | -0.0591 | 2.56E-01 | 3.82E-01 |
| KALRN        | -0.1609 | 1.88E-03 | 7.31E-03 |
| KANK1        | -0.0712 | 1.71E-01 | 2.81E-01 |
| KANK2        | -0.0256 | 6.23E-01 | 7.32E-01 |
| KANK3        | -0.2273 | 9.82E-06 | 8.28E-05 |
| KANK4        | -0.0085 | 8.71E-01 | 9.17E-01 |
| KARS         | -0.1034 | 4.65E-02 | 1.02E-01 |
| KAT2A        | 0.4035  | 5.83E-16 | 5.01E-14 |
| KAT2B        | -0.2478 | 1.35E-06 | 1.47E-05 |

|         |         |          |          |
|---------|---------|----------|----------|
| KAT5    | 0.0797  | 1.25E-01 | 2.21E-01 |
| KATNA1  | 0.4438  | 2.47E-19 | 5.18E-17 |
| KATNAL1 | -0.0290 | 5.78E-01 | 6.94E-01 |
| KATNAL2 | 0.0116  | 8.24E-01 | 8.85E-01 |
| KATNB1  | -0.0403 | 4.39E-01 | 5.71E-01 |
| KAZALD1 | -0.1052 | 4.29E-02 | 9.53E-02 |
| KAZ     | -0.1069 | 3.97E-02 | 8.96E-02 |
| KBTBD10 | 0.0296  | 5.70E-01 | 6.88E-01 |
| KBTBD11 | -0.1796 | 5.11E-04 | 2.42E-03 |
| KBTBD12 | 0.0928  | 7.42E-02 | 1.47E-01 |
| KBTBD13 | -0.0160 | 7.59E-01 | 8.38E-01 |
| KBTBD2  | 0.1841  | 3.64E-04 | 1.83E-03 |
| KBTBD3  | 0.0789  | 1.29E-01 | 2.27E-01 |
| KBTBD4  | 0.0185  | 7.23E-01 | 8.12E-01 |
| KBTBD5  | 0.0339  | 5.15E-01 | 6.39E-01 |
| KBTBD6  | 0.0115  | 8.25E-01 | 8.85E-01 |
| KBTBD7  | -0.0609 | 2.42E-01 | 3.67E-01 |
| KBTBD8  | -0.1015 | 5.09E-02 | 1.09E-01 |
| KC6     | 0.1226  | 1.82E-02 | 4.75E-02 |
| KCMF1   | 0.1023  | 4.90E-02 | 1.06E-01 |
| KCNA10  | 0.0374  | 4.73E-01 | 6.02E-01 |
| KCNA1   | 0.0026  | 9.61E-01 | 9.75E-01 |
| KCNA2   | 0.0574  | 2.70E-01 | 3.98E-01 |
| KCNA3   | -0.1501 | 3.76E-03 | 1.31E-02 |
| KCNA4   | 0.1125  | 3.03E-02 | 7.21E-02 |
| KCNA5   | -0.0840 | 1.06E-01 | 1.95E-01 |
| KCNA6   | -0.0438 | 4.00E-01 | 5.33E-01 |
| KCNA7   | 0.0766  | 1.41E-01 | 2.42E-01 |
| KCNAB1  | -0.1291 | 1.28E-02 | 3.58E-02 |
| KCNAB2  | -0.0838 | 1.07E-01 | 1.96E-01 |
| KCNAB3  | 0.0692  | 1.83E-01 | 2.96E-01 |
| KCNB1   | -0.2181 | 2.25E-05 | 1.71E-04 |
| KCNB2   | 0.0125  | 8.11E-01 | 8.76E-01 |
| KCNC1   | 0.1802  | 4.89E-04 | 2.33E-03 |
| KCNC2   | 0.0806  | 1.21E-01 | 2.16E-01 |
| KCNC3   | 0.0205  | 6.94E-01 | 7.89E-01 |
| KCNC4   | 0.1085  | 3.67E-02 | 8.42E-02 |
| KCND1   | 0.0598  | 2.50E-01 | 3.76E-01 |
| KCND2   | -0.1096 | 3.48E-02 | 8.07E-02 |
| KCND3   | -0.2660 | 1.99E-07 | 2.70E-06 |
| KCNE1L  | 0.2284  | 8.84E-06 | 7.54E-05 |
| KCNE1   | -0.1304 | 1.19E-02 | 3.37E-02 |
| KCNE2   | -0.1151 | 2.67E-02 | 6.50E-02 |
| KCNE3   | 0.1052  | 4.29E-02 | 9.53E-02 |

|        |         |          |          |
|--------|---------|----------|----------|
| KCNE4  | -0.0928 | 7.41E-02 | 1.47E-01 |
| KCNF1  | 0.1128  | 2.98E-02 | 7.10E-02 |
| KCNG1  | 0.1291  | 1.28E-02 | 3.58E-02 |
| KCNG2  | 0.0547  | 2.94E-01 | 4.23E-01 |
| KCNG3  | 0.2192  | 2.05E-05 | 1.58E-04 |
| KCNG4  | 0.0424  | 4.16E-01 | 5.49E-01 |
| KCNH1  | 0.0130  | 8.03E-01 | 8.70E-01 |
| KCNH2  | 0.1436  | 5.58E-03 | 1.80E-02 |
| KCNH3  | 0.2191  | 2.06E-05 | 1.59E-04 |
| KCNH4  | 0.1535  | 3.03E-03 | 1.09E-02 |
| KCNH5  | 0.0743  | 1.53E-01 | 2.58E-01 |
| KCNH6  | 0.0617  | 2.36E-01 | 3.59E-01 |
| KCNH7  | 0.0651  | 2.11E-01 | 3.29E-01 |
| KCNH8  | 0.0719  | 1.67E-01 | 2.75E-01 |
| KCNIP1 | -0.1062 | 4.09E-02 | 9.18E-02 |
| KCNIP2 | 0.1433  | 5.70E-03 | 1.84E-02 |
| KCNIP3 | 0.1032  | 4.69E-02 | 1.02E-01 |
| KCNIP4 | 0.0121  | 8.16E-01 | 8.79E-01 |
| KCNJ10 | 0.0554  | 2.87E-01 | 4.16E-01 |
| KCNJ11 | 0.2587  | 4.38E-07 | 5.44E-06 |
| KCNJ12 | -0.0772 | 1.38E-01 | 2.38E-01 |
| KCNJ13 | 0.0182  | 7.27E-01 | 8.15E-01 |
| KCNJ14 | 0.0444  | 3.93E-01 | 5.26E-01 |
| KCNJ15 | -0.0859 | 9.85E-02 | 1.84E-01 |
| KCNJ16 | 0.0557  | 2.85E-01 | 4.13E-01 |
| KCNJ1  | 0.0672  | 1.97E-01 | 3.12E-01 |
| KCNJ2  | 0.0205  | 6.94E-01 | 7.89E-01 |
| KCNJ3  | 0.0992  | 5.64E-02 | 1.18E-01 |
| KCNJ4  | -0.0263 | 6.13E-01 | 7.24E-01 |
| KCNJ5  | -0.0793 | 1.27E-01 | 2.23E-01 |
| KCNJ6  | -0.0825 | 1.13E-01 | 2.05E-01 |
| KCNJ8  | -0.2477 | 1.37E-06 | 1.49E-05 |
| KCNJ9  | 0.0669  | 1.99E-01 | 3.15E-01 |
| KCNK10 | 0.1545  | 2.85E-03 | 1.04E-02 |
| KCNK12 | 0.0778  | 1.35E-01 | 2.34E-01 |
| KCNK13 | 0.0272  | 6.02E-01 | 7.14E-01 |
| KCNK15 | 0.0109  | 8.34E-01 | 8.91E-01 |
| KCNK16 | -0.0603 | 2.46E-01 | 3.71E-01 |
| KCNK17 | -0.1700 | 1.01E-03 | 4.35E-03 |
| KCNK1  | 0.0019  | 9.70E-01 | 9.81E-01 |
| KCNK2  | 0.1586  | 2.18E-03 | 8.26E-03 |
| KCNK3  | 0.0119  | 8.20E-01 | 8.82E-01 |
| KCNK4  | -0.0359 | 4.91E-01 | 6.18E-01 |
| KCNK5  | 0.0046  | 9.30E-01 | 9.56E-01 |

|          |         |          |          |
|----------|---------|----------|----------|
| KCNK6    | -0.0984 | 5.83E-02 | 1.21E-01 |
| KCNK7    | 0.1007  | 5.27E-02 | 1.12E-01 |
| KCNK9    | 0.0859  | 9.85E-02 | 1.84E-01 |
| KCNMA1   | -0.1871 | 2.89E-04 | 1.51E-03 |
| KCNMB1   | -0.0370 | 4.78E-01 | 6.06E-01 |
| KCNMB2   | 0.0720  | 1.67E-01 | 2.75E-01 |
| KCNMB3   | 0.2589  | 4.27E-07 | 5.33E-06 |
| KCNMB4   | -0.0078 | 8.81E-01 | 9.24E-01 |
| KCNN1    | 0.0549  | 2.92E-01 | 4.21E-01 |
| KCNN2    | -0.1836 | 3.79E-04 | 1.89E-03 |
| KCNN3    | -0.1133 | 2.91E-02 | 6.98E-02 |
| KCNN4    | 0.0179  | 7.31E-01 | 8.18E-01 |
| KCNQ1DN  | -0.0635 | 2.22E-01 | 3.43E-01 |
| KCNQ1OT1 | 0.2038  | 7.70E-05 | 4.89E-04 |
| KCNQ1    | -0.0131 | 8.02E-01 | 8.69E-01 |
| KCNQ2    | -0.0412 | 4.28E-01 | 5.61E-01 |
| KCNQ3    | -0.0202 | 6.98E-01 | 7.92E-01 |
| KCNQ4    | 0.1068  | 3.98E-02 | 8.98E-02 |
| KCNQ5    | -0.0256 | 6.23E-01 | 7.32E-01 |
| KCNRG    | 0.0291  | 5.76E-01 | 6.93E-01 |
| KCNS1    | 0.0856  | 9.98E-02 | 1.86E-01 |
| KCNS2    | -0.0661 | 2.04E-01 | 3.22E-01 |
| KCNS3    | 0.0376  | 4.70E-01 | 6.00E-01 |
| KCNT1    | -0.0568 | 2.75E-01 | 4.03E-01 |
| KCNT2    | 0.1190  | 2.18E-02 | 5.52E-02 |
| KCNU1    | -0.0785 | 1.31E-01 | 2.29E-01 |
| KCNV1    | 0.1683  | 1.14E-03 | 4.79E-03 |
| KCNV2    | 0.2350  | 4.76E-06 | 4.46E-05 |
| KCP      | 0.1489  | 4.06E-03 | 1.39E-02 |
| KCTD10   | 0.0250  | 6.31E-01 | 7.39E-01 |
| KCTD11   | -0.1104 | 3.35E-02 | 7.82E-02 |
| KCTD12   | -0.1509 | 3.57E-03 | 1.25E-02 |
| KCTD13   | 0.0561  | 2.81E-01 | 4.10E-01 |
| KCTD14   | 0.0288  | 5.80E-01 | 6.97E-01 |
| KCTD15   | -0.0653 | 2.09E-01 | 3.28E-01 |
| KCTD16   | 0.0016  | 9.75E-01 | 9.84E-01 |
| KCTD17   | 0.1806  | 4.72E-04 | 2.26E-03 |
| KCTD18   | -0.0928 | 7.43E-02 | 1.47E-01 |
| KCTD19   | 0.1289  | 1.30E-02 | 3.62E-02 |
| KCTD1    | 0.0500  | 3.37E-01 | 4.69E-01 |
| KCTD20   | 0.0607  | 2.43E-01 | 3.68E-01 |
| KCTD21   | -0.2251 | 1.20E-05 | 9.84E-05 |
| KCTD2    | 0.0832  | 1.10E-01 | 2.00E-01 |
| KCTD3    | 0.1588  | 2.16E-03 | 8.21E-03 |

|          |         |          |          |
|----------|---------|----------|----------|
| KCTD4    | 0.0048  | 9.26E-01 | 9.53E-01 |
| KCTD5    | 0.0988  | 5.73E-02 | 1.20E-01 |
| KCTD6    | 0.1449  | 5.16E-03 | 1.69E-02 |
| KCTD7    | 0.2521  | 8.66E-07 | 9.98E-06 |
| KCTD8    | 0.0446  | 3.92E-01 | 5.25E-01 |
| KCTD9    | 0.0646  | 2.15E-01 | 3.34E-01 |
| KDELC1   | 0.1907  | 2.20E-04 | 1.20E-03 |
| KDELC2   | 0.0677  | 1.94E-01 | 3.09E-01 |
| KDELR1   | -0.0140 | 7.89E-01 | 8.60E-01 |
| KDELR2   | -0.0621 | 2.33E-01 | 3.56E-01 |
| KDELR3   | 0.0220  | 6.72E-01 | 7.72E-01 |
| KDM1A    | 0.1415  | 6.32E-03 | 2.00E-02 |
| KDM1B    | 0.0820  | 1.15E-01 | 2.07E-01 |
| KDM2A    | 0.0638  | 2.20E-01 | 3.41E-01 |
| KDM2B    | 0.0827  | 1.12E-01 | 2.03E-01 |
| KDM3A    | 0.0544  | 2.96E-01 | 4.26E-01 |
| KDM3B    | 0.1522  | 3.29E-03 | 1.17E-02 |
| KDM4A    | -0.0746 | 1.51E-01 | 2.56E-01 |
| KDM4B    | -0.0926 | 7.47E-02 | 1.48E-01 |
| KDM4C    | 0.0637  | 2.21E-01 | 3.42E-01 |
| KDM4DL   | -0.0403 | 4.39E-01 | 5.71E-01 |
| KDM4D    | 0.1167  | 2.46E-02 | 6.07E-02 |
| KDM5A    | -0.0590 | 2.57E-01 | 3.83E-01 |
| KDM5B    | 0.1623  | 1.71E-03 | 6.77E-03 |
| KDM5C    | 0.1545  | 2.84E-03 | 1.03E-02 |
| KDM5D    | -0.0335 | 5.21E-01 | 6.44E-01 |
| KDM6A    | 0.1170  | 2.43E-02 | 6.00E-02 |
| KDM6B    | -0.0595 | 2.53E-01 | 3.78E-01 |
| KDR      | -0.2579 | 4.76E-07 | 5.86E-06 |
| KDSR     | -0.2501 | 1.07E-06 | 1.20E-05 |
| KEAP1    | -0.0452 | 3.86E-01 | 5.19E-01 |
| KEL      | 0.1676  | 1.20E-03 | 5.01E-03 |
| KERA     | -0.0846 | 1.04E-01 | 1.91E-01 |
| KGFLP1   | -0.0194 | 7.09E-01 | 8.01E-01 |
| KGFLP2   | -0.0125 | 8.11E-01 | 8.76E-01 |
| KHDC1L   | 0.1668  | 1.26E-03 | 5.23E-03 |
| KHDC1    | 0.2476  | 1.38E-06 | 1.51E-05 |
| KHDRBS1  | 0.2963  | 5.88E-09 | 1.16E-07 |
| KHDRBS2  | 0.0933  | 7.28E-02 | 1.45E-01 |
| KHDRBS3  | -0.0641 | 2.18E-01 | 3.39E-01 |
| KHK      | -0.1315 | 1.13E-02 | 3.22E-02 |
| KHNYN    | 0.0752  | 1.48E-01 | 2.52E-01 |
| KHSRP    | 0.1765  | 6.39E-04 | 2.93E-03 |
| KIAA0020 | 0.0649  | 2.12E-01 | 3.32E-01 |



|            |         |          |          |
|------------|---------|----------|----------|
| KIAA0040   | 0.0482  | 3.54E-01 | 4.86E-01 |
| KIAA0087   | 0.0331  | 5.25E-01 | 6.48E-01 |
| KIAA0090   | 0.0105  | 8.41E-01 | 8.95E-01 |
| KIAA0100   | 0.1868  | 2.98E-04 | 1.55E-03 |
| KIAA0101   | 0.3769  | 5.76E-14 | 3.19E-12 |
| KIAA0114   | 0.0185  | 7.22E-01 | 8.11E-01 |
| KIAA0125   | 0.0651  | 2.11E-01 | 3.30E-01 |
| KIAA0141   | -0.2339 | 5.27E-06 | 4.85E-05 |
| KIAA0146   | 0.1105  | 3.33E-02 | 7.79E-02 |
| KIAA0174   | -0.0220 | 6.73E-01 | 7.72E-01 |
| KIAA0182   | -0.0902 | 8.28E-02 | 1.60E-01 |
| KIAA0195   | 0.2333  | 5.62E-06 | 5.11E-05 |
| KIAA0196   | 0.0680  | 1.91E-01 | 3.06E-01 |
| KIAA0226   | 0.2252  | 1.19E-05 | 9.80E-05 |
| KIAA0232   | 0.0429  | 4.10E-01 | 5.43E-01 |
| KIAA0240   | -0.0582 | 2.63E-01 | 3.90E-01 |
| KIAA0247   | -0.0830 | 1.10E-01 | 2.01E-01 |
| KIAA0284   | 0.0036  | 9.45E-01 | 9.66E-01 |
| KIAA0317   | -0.0486 | 3.51E-01 | 4.83E-01 |
| KIAA0319L  | -0.0351 | 5.00E-01 | 6.26E-01 |
| KIAA0319   | 0.2070  | 5.89E-05 | 3.90E-04 |
| KIAA0355   | 0.0551  | 2.90E-01 | 4.19E-01 |
| KIAA0368   | 0.1779  | 5.78E-04 | 2.69E-03 |
| KIAA0391   | -0.0864 | 9.67E-02 | 1.81E-01 |
| KIAA0406   | 0.2041  | 7.50E-05 | 4.78E-04 |
| KIAA0408   | -0.1680 | 1.16E-03 | 4.89E-03 |
| KIAA0415   | 0.2169  | 2.52E-05 | 1.89E-04 |
| KIAA0427   | -0.1802 | 4.88E-04 | 2.33E-03 |
| KIAA0430   | -0.0696 | 1.81E-01 | 2.93E-01 |
| KIAA0467   | 0.1275  | 1.40E-02 | 3.85E-02 |
| KIAA0494   | -0.1031 | 4.73E-02 | 1.03E-01 |
| KIAA0495   | 0.1023  | 4.91E-02 | 1.06E-01 |
| KIAA0513   | -0.1474 | 4.44E-03 | 1.50E-02 |
| KIAA0528   | 0.2524  | 8.46E-07 | 9.78E-06 |
| KIAA0556   | 0.1307  | 1.18E-02 | 3.34E-02 |
| KIAA0562   | -0.0899 | 8.38E-02 | 1.62E-01 |
| KIAA0564   | -0.2451 | 1.77E-06 | 1.88E-05 |
| KIAA0586   | 0.0384  | 4.61E-01 | 5.92E-01 |
| KIAA0649   | 0.1336  | 9.99E-03 | 2.92E-02 |
| KIAA0652   | -0.0588 | 2.59E-01 | 3.85E-01 |
| KIAA0664P3 | 0.0379  | 4.67E-01 | 5.96E-01 |
| KIAA0664   | -0.2672 | 1.74E-07 | 2.39E-06 |
| KIAA0748   | -0.0514 | 3.23E-01 | 4.54E-01 |
| KIAA0753   | 0.1331  | 1.03E-02 | 2.99E-02 |

|           |         |          |          |
|-----------|---------|----------|----------|
| KIAA0754  | -0.1192 | 2.16E-02 | 5.47E-02 |
| KIAA0776  | -0.0211 | 6.86E-01 | 7.82E-01 |
| KIAA0802  | 0.1416  | 6.29E-03 | 1.99E-02 |
| KIAA0831  | -0.0160 | 7.58E-01 | 8.38E-01 |
| KIAA0892  | 0.2453  | 1.73E-06 | 1.83E-05 |
| KIAA0895L | 0.1264  | 1.48E-02 | 4.04E-02 |
| KIAA0895  | 0.1256  | 1.55E-02 | 4.17E-02 |
| KIAA0907  | 0.5807  | 7.98E-35 | 1.14E-31 |
| KIAA0913  | -0.0347 | 5.05E-01 | 6.30E-01 |
| KIAA0922  | -0.2313 | 6.76E-06 | 6.00E-05 |
| KIAA0947  | 0.1436  | 5.61E-03 | 1.81E-02 |
| KIAA1009  | 0.3792  | 3.91E-14 | 2.27E-12 |
| KIAA1012  | -0.1050 | 4.33E-02 | 9.60E-02 |
| KIAA1024  | 0.1346  | 9.46E-03 | 2.80E-02 |
| KIAA1033  | -0.0782 | 1.33E-01 | 2.31E-01 |
| KIAA1045  | -0.0022 | 9.67E-01 | 9.80E-01 |
| KIAA1107  | 0.2101  | 4.52E-05 | 3.11E-04 |
| KIAA1109  | -0.1235 | 1.74E-02 | 4.57E-02 |
| KIAA1143  | 0.0315  | 5.45E-01 | 6.65E-01 |
| KIAA1147  | -0.0990 | 5.67E-02 | 1.19E-01 |
| KIAA1161  | -0.1543 | 2.88E-03 | 1.04E-02 |
| KIAA1191  | -0.1817 | 4.35E-04 | 2.11E-03 |
| KIAA1199  | 0.0058  | 9.11E-01 | 9.44E-01 |
| KIAA1210  | 0.0684  | 1.88E-01 | 3.02E-01 |
| KIAA1211  | 0.0236  | 6.50E-01 | 7.54E-01 |
| KIAA1217  | 0.0348  | 5.04E-01 | 6.29E-01 |
| KIAA1239  | 0.1344  | 9.55E-03 | 2.82E-02 |
| KIAA1244  | 0.2471  | 1.45E-06 | 1.57E-05 |
| KIAA1257  | 0.1632  | 1.61E-03 | 6.43E-03 |
| KIAA1267  | 0.1987  | 1.17E-04 | 6.97E-04 |
| KIAA1274  | 0.0038  | 9.42E-01 | 9.64E-01 |
| KIAA1279  | 0.0494  | 3.43E-01 | 4.75E-01 |
| KIAA1310  | 0.2013  | 9.44E-05 | 5.81E-04 |
| KIAA1324L | 0.0077  | 8.82E-01 | 9.25E-01 |
| KIAA1324  | 0.1413  | 6.43E-03 | 2.03E-02 |
| KIAA1328  | 0.2574  | 5.01E-07 | 6.13E-06 |
| KIAA1370  | -0.1499 | 3.80E-03 | 1.32E-02 |
| KIAA1377  | 0.1884  | 2.63E-04 | 1.39E-03 |
| KIAA1383  | 0.1592  | 2.10E-03 | 8.02E-03 |
| KIAA1407  | 0.2609  | 3.47E-07 | 4.44E-06 |
| KIAA1409  | -0.1484 | 4.18E-03 | 1.43E-02 |
| KIAA1429  | 0.0844  | 1.05E-01 | 1.92E-01 |
| KIAA1430  | -0.1868 | 2.96E-04 | 1.54E-03 |
| KIAA1432  | -0.0384 | 4.61E-01 | 5.92E-01 |

|           |         |          |          |
|-----------|---------|----------|----------|
| KIAA1462  | -0.0277 | 5.95E-01 | 7.09E-01 |
| KIAA1467  | 0.0586  | 2.61E-01 | 3.87E-01 |
| KIAA1468  | 0.0639  | 2.20E-01 | 3.40E-01 |
| KIAA1486  | 0.1248  | 1.61E-02 | 4.31E-02 |
| KIAA1522  | 0.2558  | 5.89E-07 | 7.05E-06 |
| KIAA1524  | 0.3563  | 1.51E-12 | 6.46E-11 |
| KIAA1529  | 0.1952  | 1.55E-04 | 8.86E-04 |
| KIAA1530  | 0.1554  | 2.69E-03 | 9.86E-03 |
| KIAA1539  | -0.0035 | 9.46E-01 | 9.67E-01 |
| KIAA1543  | 0.0653  | 2.10E-01 | 3.28E-01 |
| KIAA1549  | 0.0148  | 7.76E-01 | 8.50E-01 |
| KIAA1586  | 0.2150  | 2.95E-05 | 2.16E-04 |
| KIAA1598  | -0.0417 | 4.23E-01 | 5.55E-01 |
| KIAA1609  | 0.1974  | 1.29E-04 | 7.61E-04 |
| KIAA1614  | 0.2790  | 4.61E-08 | 7.28E-07 |
| KIAA1632  | 0.0054  | 9.18E-01 | 9.48E-01 |
| KIAA1644  | -0.1466 | 4.65E-03 | 1.55E-02 |
| KIAA1671  | -0.1575 | 2.35E-03 | 8.80E-03 |
| KIAA1683  | -0.0909 | 8.05E-02 | 1.56E-01 |
| KIAA1704  | 0.0033  | 9.49E-01 | 9.68E-01 |
| KIAA1712  | -0.0567 | 2.76E-01 | 4.04E-01 |
| KIAA1715  | -0.1213 | 1.94E-02 | 5.02E-02 |
| KIAA1731  | 0.3923  | 4.28E-15 | 2.99E-13 |
| KIAA1737  | -0.1945 | 1.64E-04 | 9.27E-04 |
| KIAA1751  | 0.0701  | 1.78E-01 | 2.89E-01 |
| KIAA1755  | -0.1368 | 8.35E-03 | 2.52E-02 |
| KIAA1797  | 0.2352  | 4.68E-06 | 4.39E-05 |
| KIAA1804  | 0.2685  | 1.51E-07 | 2.11E-06 |
| KIAA1826  | -0.0226 | 6.64E-01 | 7.64E-01 |
| KIAA1841  | 0.3846  | 1.60E-14 | 9.93E-13 |
| KIAA1875  | 0.1764  | 6.42E-04 | 2.94E-03 |
| KIAA1908  | 0.0524  | 3.15E-01 | 4.44E-01 |
| KIAA1919  | 0.0750  | 1.49E-01 | 2.53E-01 |
| KIAA1949  | 0.1000  | 5.42E-02 | 1.15E-01 |
| KIAA1958  | 0.0435  | 4.04E-01 | 5.36E-01 |
| KIAA1967  | 0.1041  | 4.51E-02 | 9.91E-02 |
| KIAA1984  | 0.1472  | 4.49E-03 | 1.51E-02 |
| KIAA2013  | -0.2340 | 5.22E-06 | 4.82E-05 |
| KIAA2018  | -0.1188 | 2.21E-02 | 5.57E-02 |
| KIAA2022  | 0.0753  | 1.48E-01 | 2.51E-01 |
| KIAA2026  | 0.0288  | 5.80E-01 | 6.96E-01 |
| KIDINS220 | -0.0342 | 5.12E-01 | 6.36E-01 |
| KIF11     | 0.4290  | 4.87E-18 | 6.95E-16 |
| KIF12     | 0.2397  | 3.01E-06 | 2.98E-05 |

|         |         |          |          |
|---------|---------|----------|----------|
| KIF13A  | -0.0638 | 2.20E-01 | 3.41E-01 |
| KIF13B  | -0.0967 | 6.27E-02 | 1.29E-01 |
| KIF14   | 0.4342  | 1.71E-18 | 2.81E-16 |
| KIF15   | 0.3832  | 2.00E-14 | 1.23E-12 |
| KIF16B  | -0.0423 | 4.16E-01 | 5.49E-01 |
| KIF17   | -0.0726 | 1.63E-01 | 2.70E-01 |
| KIF18A  | 0.4132  | 9.90E-17 | 1.01E-14 |
| KIF18B  | 0.4914  | 5.95E-24 | 2.89E-21 |
| KIF19   | -0.1514 | 3.46E-03 | 1.22E-02 |
| KIF1A   | 0.0615  | 2.37E-01 | 3.61E-01 |
| KIF1B   | -0.0911 | 7.96E-02 | 1.55E-01 |
| KIF1C   | -0.2524 | 8.40E-07 | 9.71E-06 |
| KIF20A  | 0.3665  | 3.08E-13 | 1.51E-11 |
| KIF20B  | 0.3041  | 2.24E-09 | 4.88E-08 |
| KIF21A  | 0.0184  | 7.23E-01 | 8.12E-01 |
| KIF21B  | 0.2354  | 4.57E-06 | 4.30E-05 |
| KIF22   | 0.1849  | 3.44E-04 | 1.75E-03 |
| KIF23   | 0.4136  | 9.21E-17 | 9.41E-15 |
| KIF24   | 0.3456  | 7.56E-12 | 2.79E-10 |
| KIF25   | 0.1195  | 2.13E-02 | 5.40E-02 |
| KIF26A  | -0.1501 | 3.76E-03 | 1.31E-02 |
| KIF26B  | 0.1073  | 3.89E-02 | 8.81E-02 |
| KIF27   | 0.0537  | 3.02E-01 | 4.31E-01 |
| KIF2A   | 0.1975  | 1.28E-04 | 7.56E-04 |
| KIF2B   | 0.0576  | 2.68E-01 | 3.96E-01 |
| KIF2C   | 0.4493  | 7.90E-20 | 1.92E-17 |
| KIF3A   | 0.0921  | 7.63E-02 | 1.50E-01 |
| KIF3B   | -0.0995 | 5.55E-02 | 1.17E-01 |
| KIF3C   | 0.1015  | 5.08E-02 | 1.09E-01 |
| KIF4A   | 0.4393  | 6.21E-19 | 1.22E-16 |
| KIF4B   | 0.3193  | 3.09E-10 | 8.31E-09 |
| KIF5A   | 0.0303  | 5.61E-01 | 6.79E-01 |
| KIF5B   | 0.1304  | 1.19E-02 | 3.37E-02 |
| KIF5C   | -0.0497 | 3.40E-01 | 4.72E-01 |
| KIF6    | 0.0378  | 4.67E-01 | 5.97E-01 |
| KIF7    | 0.0853  | 1.01E-01 | 1.87E-01 |
| KIF9    | 0.0393  | 4.50E-01 | 5.82E-01 |
| KIFAP3  | 0.2593  | 4.08E-07 | 5.11E-06 |
| KIFC1   | 0.4751  | 2.78E-22 | 9.89E-20 |
| KIFC2   | 0.1702  | 9.95E-04 | 4.28E-03 |
| KIFC3   | 0.0140  | 7.88E-01 | 8.59E-01 |
| KILLIN  | -0.1936 | 1.75E-04 | 9.82E-04 |
| KIN     | 0.2828  | 2.99E-08 | 4.93E-07 |
| KIR2DL1 | -0.0685 | 1.88E-01 | 3.01E-01 |

|         |         |          |          |
|---------|---------|----------|----------|
| KIR2DL3 | -0.0194 | 7.09E-01 | 8.01E-01 |
| KIR2DL4 | 0.0009  | 9.86E-01 | 9.92E-01 |
| KIR2DS4 | -0.0241 | 6.43E-01 | 7.48E-01 |
| KIR3DL1 | -0.1063 | 4.06E-02 | 9.13E-02 |
| KIR3DL2 | 0.0163  | 7.54E-01 | 8.35E-01 |
| KIR3DL3 | -0.0703 | 1.77E-01 | 2.88E-01 |
| KIR3DP1 | -0.0221 | 6.71E-01 | 7.71E-01 |
| KIR3DX1 | -0.0118 | 8.21E-01 | 8.82E-01 |
| KIRREL2 | 0.1025  | 4.86E-02 | 1.05E-01 |
| KIRREL3 | 0.1705  | 9.78E-04 | 4.22E-03 |
| KIRREL  | -0.0756 | 1.46E-01 | 2.49E-01 |
| KISS1R  | 0.1577  | 2.31E-03 | 8.68E-03 |
| KISS1   | 0.0675  | 1.95E-01 | 3.10E-01 |
| KITLG   | 0.0786  | 1.31E-01 | 2.28E-01 |
| KIT     | -0.0467 | 3.69E-01 | 5.02E-01 |
| KLB     | 0.0798  | 1.25E-01 | 2.21E-01 |
| KLC1    | -0.0108 | 8.36E-01 | 8.92E-01 |
| KLC2    | 0.1715  | 9.11E-04 | 3.97E-03 |
| KLC3    | 0.2556  | 6.08E-07 | 7.25E-06 |
| KLC4    | -0.1862 | 3.12E-04 | 1.61E-03 |
| KLF10   | -0.0847 | 1.03E-01 | 1.90E-01 |
| KLF11   | 0.0096  | 8.54E-01 | 9.06E-01 |
| KLF12   | -0.1660 | 1.33E-03 | 5.46E-03 |
| KLF13   | 0.0674  | 1.95E-01 | 3.11E-01 |
| KLF14   | -0.0229 | 6.61E-01 | 7.62E-01 |
| KLF15   | -0.1212 | 1.95E-02 | 5.04E-02 |
| KLF16   | 0.0417  | 4.23E-01 | 5.55E-01 |
| KLF17   | 0.0065  | 9.01E-01 | 9.37E-01 |
| KLF1    | 0.0316  | 5.45E-01 | 6.65E-01 |
| KLF2    | -0.1110 | 3.26E-02 | 7.65E-02 |
| KLF3    | 0.0124  | 8.12E-01 | 8.77E-01 |
| KLF4    | 0.0461  | 3.76E-01 | 5.09E-01 |
| KLF5    | 0.2183  | 2.22E-05 | 1.69E-04 |
| KLF6    | -0.1027 | 4.81E-02 | 1.04E-01 |
| KLF7    | -0.0485 | 3.51E-01 | 4.83E-01 |
| KLF8    | -0.1035 | 4.64E-02 | 1.01E-01 |
| KLF9    | -0.1879 | 2.74E-04 | 1.44E-03 |
| KLHDC10 | -0.1456 | 4.94E-03 | 1.63E-02 |
| KLHDC1  | -0.0901 | 8.30E-02 | 1.60E-01 |
| KLHDC2  | -0.2064 | 6.19E-05 | 4.05E-04 |
| KLHDC3  | 0.0949  | 6.79E-02 | 1.37E-01 |
| KLHDC4  | -0.1606 | 1.92E-03 | 7.42E-03 |
| KLHDC5  | 0.1685  | 1.12E-03 | 4.75E-03 |
| KLHDC7A | -0.1490 | 4.02E-03 | 1.38E-02 |

|         |         |          |          |
|---------|---------|----------|----------|
| KLHDC7B | 0.0526  | 3.13E-01 | 4.42E-01 |
| KLHDC8A | 0.1788  | 5.39E-04 | 2.54E-03 |
| KLHDC8B | 0.0706  | 1.75E-01 | 2.85E-01 |
| KLHDC9  | 0.0701  | 1.78E-01 | 2.89E-01 |
| KLHL10  | -0.0038 | 9.43E-01 | 9.64E-01 |
| KLHL11  | 0.0351  | 5.00E-01 | 6.26E-01 |
| KLHL12  | 0.2139  | 3.25E-05 | 2.34E-04 |
| KLHL13  | 0.0710  | 1.73E-01 | 2.82E-01 |
| KLHL14  | -0.0075 | 8.85E-01 | 9.27E-01 |
| KLHL15  | -0.0907 | 8.09E-02 | 1.57E-01 |
| KLHL17  | 0.2854  | 2.21E-08 | 3.78E-07 |
| KLHL18  | -0.0184 | 7.24E-01 | 8.13E-01 |
| KLHL1   | 0.0334  | 5.22E-01 | 6.46E-01 |
| KLHL20  | 0.1360  | 8.72E-03 | 2.62E-02 |
| KLHL21  | -0.0451 | 3.86E-01 | 5.19E-01 |
| KLHL22  | 0.1783  | 5.58E-04 | 2.61E-03 |
| KLHL23  | 0.0583  | 2.62E-01 | 3.89E-01 |
| KLHL24  | -0.1215 | 1.92E-02 | 4.98E-02 |
| KLHL25  | -0.0780 | 1.34E-01 | 2.32E-01 |
| KLHL26  | -0.0705 | 1.75E-01 | 2.86E-01 |
| KLHL28  | -0.0599 | 2.50E-01 | 3.75E-01 |
| KLHL29  | 0.1178  | 2.33E-02 | 5.81E-02 |
| KLHL2   | -0.2840 | 2.61E-08 | 4.34E-07 |
| KLHL30  | 0.0900  | 8.33E-02 | 1.61E-01 |
| KLHL31  | 0.0113  | 8.28E-01 | 8.88E-01 |
| KLHL32  | -0.0610 | 2.41E-01 | 3.66E-01 |
| KLHL33  | -0.0513 | 3.25E-01 | 4.55E-01 |
| KLHL34  | -0.0676 | 1.94E-01 | 3.09E-01 |
| KLHL35  | 0.0654  | 2.09E-01 | 3.28E-01 |
| KLHL36  | -0.1412 | 6.46E-03 | 2.04E-02 |
| KLHL38  | 0.1440  | 5.45E-03 | 1.77E-02 |
| KLHL3   | 0.0563  | 2.79E-01 | 4.08E-01 |
| KLHL4   | -0.0709 | 1.73E-01 | 2.83E-01 |
| KLHL5   | -0.0553 | 2.88E-01 | 4.17E-01 |
| KLHL6   | -0.1054 | 4.24E-02 | 9.44E-02 |
| KLHL7   | 0.0722  | 1.65E-01 | 2.73E-01 |
| KLHL8   | -0.2122 | 3.78E-05 | 2.67E-04 |
| KLHL9   | 0.1183  | 2.27E-02 | 5.69E-02 |
| KLK10   | -0.1334 | 1.01E-02 | 2.95E-02 |
| KLK11   | -0.1284 | 1.33E-02 | 3.70E-02 |
| KLK12   | 0.0198  | 7.03E-01 | 7.96E-01 |
| KLK13   | -0.0224 | 6.67E-01 | 7.67E-01 |
| KLK14   | 0.0654  | 2.09E-01 | 3.27E-01 |
| KLK15   | 0.1070  | 3.93E-02 | 8.89E-02 |

|         |         |          |          |
|---------|---------|----------|----------|
| KLK1    | 0.0985  | 5.81E-02 | 1.21E-01 |
| KLK2    | -0.0249 | 6.33E-01 | 7.40E-01 |
| KLK3    | -0.0545 | 2.95E-01 | 4.25E-01 |
| KLK4    | -0.0721 | 1.66E-01 | 2.74E-01 |
| KLK5    | 0.0466  | 3.71E-01 | 5.04E-01 |
| KLK6    | 0.0926  | 7.48E-02 | 1.48E-01 |
| KLK7    | 0.0642  | 2.18E-01 | 3.38E-01 |
| KLK8    | 0.0575  | 2.70E-01 | 3.97E-01 |
| KLK9    | 0.0225  | 6.65E-01 | 7.65E-01 |
| KLKB1   | -0.3097 | 1.09E-09 | 2.55E-08 |
| KLKP1   | -0.0118 | 8.20E-01 | 8.82E-01 |
| KLRA1   | 0.2088  | 5.04E-05 | 3.41E-04 |
| KLRAQ1  | 0.0195  | 7.08E-01 | 8.01E-01 |
| KLRB1   | -0.1398 | 6.98E-03 | 2.17E-02 |
| KLRC1   | -0.0277 | 5.94E-01 | 7.08E-01 |
| KLRC2   | 0.0537  | 3.03E-01 | 4.32E-01 |
| KLRC3   | -0.0169 | 7.45E-01 | 8.28E-01 |
| KLRC4   | -0.0585 | 2.61E-01 | 3.87E-01 |
| KLRD1   | -0.1534 | 3.05E-03 | 1.10E-02 |
| KLRF1   | -0.1303 | 1.20E-02 | 3.39E-02 |
| KLRG1   | -0.0066 | 9.00E-01 | 9.37E-01 |
| KLRG2   | 0.0398  | 4.44E-01 | 5.76E-01 |
| KLRK1   | -0.0960 | 6.46E-02 | 1.32E-01 |
| KL      | -0.2330 | 5.77E-06 | 5.23E-05 |
| KMO     | -0.2327 | 5.93E-06 | 5.36E-05 |
| KNCN    | 0.1058  | 4.16E-02 | 9.29E-02 |
| KNDC1   | -0.0115 | 8.26E-01 | 8.86E-01 |
| KNG1    | -0.1399 | 6.97E-03 | 2.17E-02 |
| KNTC1   | 0.4459  | 1.61E-19 | 3.56E-17 |
| KPNA1   | -0.2238 | 1.36E-05 | 1.10E-04 |
| KPNA2   | 0.3814  | 2.71E-14 | 1.62E-12 |
| KPNA3   | -0.0893 | 8.58E-02 | 1.65E-01 |
| KPNA4   | 0.0695  | 1.81E-01 | 2.93E-01 |
| KPNA5   | 0.1906  | 2.22E-04 | 1.20E-03 |
| KPNA6   | -0.0571 | 2.73E-01 | 4.01E-01 |
| KPNA7   | 0.1153  | 2.63E-02 | 6.43E-02 |
| KPNB1   | 0.2741  | 8.14E-08 | 1.21E-06 |
| KPRP    | 0.1654  | 1.39E-03 | 5.66E-03 |
| KPTN    | 0.1345  | 9.52E-03 | 2.81E-02 |
| KRAS    | 0.1363  | 8.58E-03 | 2.58E-02 |
| KRBA1   | 0.2210  | 1.74E-05 | 1.37E-04 |
| KRBA2   | 0.0410  | 4.31E-01 | 5.63E-01 |
| KRCC1   | -0.1276 | 1.39E-02 | 3.84E-02 |
| KREMEN1 | 0.1432  | 5.74E-03 | 1.85E-02 |

|         |         |          |          |
|---------|---------|----------|----------|
| KREMEN2 | 0.1334  | 1.01E-02 | 2.95E-02 |
| KRI1    | 0.1902  | 2.29E-04 | 1.24E-03 |
| KRIT1   | -0.0155 | 7.67E-01 | 8.43E-01 |
| KRR1    | -0.0019 | 9.71E-01 | 9.81E-01 |
| KRT10   | 0.2026  | 8.49E-05 | 5.31E-04 |
| KRT12   | 0.0075  | 8.85E-01 | 9.27E-01 |
| KRT13   | -0.0169 | 7.45E-01 | 8.28E-01 |
| KRT14   | -0.0261 | 6.16E-01 | 7.26E-01 |
| KRT15   | 0.0625  | 2.30E-01 | 3.52E-01 |
| KRT16   | 0.0053  | 9.19E-01 | 9.49E-01 |
| KRT17   | 0.1082  | 3.73E-02 | 8.53E-02 |
| KRT18   | -0.0552 | 2.89E-01 | 4.18E-01 |
| KRT19   | 0.0623  | 2.31E-01 | 3.54E-01 |
| KRT1    | -0.1123 | 3.06E-02 | 7.26E-02 |
| KRT20   | 0.0002  | 9.98E-01 | 9.98E-01 |
| KRT222  | -0.0123 | 8.13E-01 | 8.77E-01 |
| KRT23   | 0.0797  | 1.26E-01 | 2.21E-01 |
| KRT24   | -0.0250 | 6.31E-01 | 7.39E-01 |
| KRT25   | 0.1118  | 3.13E-02 | 7.39E-02 |
| KRT27   | -0.1373 | 8.07E-03 | 2.45E-02 |
| KRT28   | -0.0035 | 9.46E-01 | 9.67E-01 |
| KRT2    | 0.0593  | 2.55E-01 | 3.80E-01 |
| KRT31   | 0.0350  | 5.02E-01 | 6.28E-01 |
| KRT32   | 0.0652  | 2.10E-01 | 3.29E-01 |
| KRT33B  | -0.0023 | 9.65E-01 | 9.79E-01 |
| KRT34   | 0.0463  | 3.73E-01 | 5.06E-01 |
| KRT35   | -0.0550 | 2.91E-01 | 4.20E-01 |
| KRT36   | 0.0437  | 4.02E-01 | 5.35E-01 |
| KRT37   | 0.0778  | 1.35E-01 | 2.34E-01 |
| KRT38   | 0.0784  | 1.32E-01 | 2.29E-01 |
| KRT39   | 0.1147  | 2.72E-02 | 6.60E-02 |
| KRT3    | 0.0357  | 4.93E-01 | 6.20E-01 |
| KRT40   | 0.0642  | 2.18E-01 | 3.38E-01 |
| KRT4    | 0.0475  | 3.61E-01 | 4.93E-01 |
| KRT5    | -0.0937 | 7.13E-02 | 1.42E-01 |
| KRT6A   | -0.0849 | 1.03E-01 | 1.89E-01 |
| KRT6B   | -0.0256 | 6.24E-01 | 7.32E-01 |
| KRT6C   | 0.0052  | 9.20E-01 | 9.49E-01 |
| KRT71   | 0.0191  | 7.14E-01 | 8.05E-01 |
| KRT72   | 0.0120  | 8.18E-01 | 8.81E-01 |
| KRT73   | 0.0552  | 2.89E-01 | 4.18E-01 |
| KRT74   | 0.0101  | 8.47E-01 | 9.00E-01 |
| KRT75   | 0.0524  | 3.14E-01 | 4.44E-01 |
| KRT76   | 0.0138  | 7.91E-01 | 8.62E-01 |



|            |         |          |          |
|------------|---------|----------|----------|
| KRT77      | 0.0685  | 1.88E-01 | 3.02E-01 |
| KRT78      | 0.0146  | 7.80E-01 | 8.53E-01 |
| KRT79      | 0.0555  | 2.86E-01 | 4.15E-01 |
| KRT7       | 0.0249  | 6.32E-01 | 7.40E-01 |
| KRT80      | 0.1525  | 3.23E-03 | 1.15E-02 |
| KRT81      | -0.0001 | 9.99E-01 | 1.00E+00 |
| KRT82      | -0.0461 | 3.75E-01 | 5.09E-01 |
| KRT83      | -0.0292 | 5.75E-01 | 6.92E-01 |
| KRT84      | 0.0044  | 9.33E-01 | 9.58E-01 |
| KRT85      | 0.0657  | 2.07E-01 | 3.25E-01 |
| KRT86      | -0.0053 | 9.19E-01 | 9.49E-01 |
| KRT8       | -0.0349 | 5.03E-01 | 6.28E-01 |
| KRT9       | 0.1694  | 1.05E-03 | 4.48E-03 |
| KRTAP1-1   | 0.1019  | 4.99E-02 | 1.07E-01 |
| KRTAP1-3   | 0.0055  | 9.16E-01 | 9.47E-01 |
| KRTAP1-5   | -0.0128 | 8.05E-01 | 8.71E-01 |
| KRTAP10-10 | 0.0337  | 5.18E-01 | 6.42E-01 |
| KRTAP10-12 | 0.0032  | 9.52E-01 | 9.70E-01 |
| KRTAP10-1  | 0.1073  | 3.89E-02 | 8.81E-02 |
| KRTAP10-2  | 0.0558  | 2.84E-01 | 4.13E-01 |
| KRTAP10-3  | 0.0416  | 4.24E-01 | 5.57E-01 |
| KRTAP10-4  | 0.0871  | 9.40E-02 | 1.77E-01 |
| KRTAP10-5  | -0.0487 | 3.49E-01 | 4.81E-01 |
| KRTAP10-6  | -0.0928 | 7.41E-02 | 1.47E-01 |
| KRTAP10-7  | -0.0206 | 6.93E-01 | 7.88E-01 |
| KRTAP11-1  | -0.0857 | 9.94E-02 | 1.85E-01 |
| KRTAP12-1  | -0.0093 | 8.58E-01 | 9.08E-01 |
| KRTAP12-2  | -0.0504 | 3.33E-01 | 4.64E-01 |
| KRTAP12-3  | 0.0497  | 3.40E-01 | 4.71E-01 |
| KRTAP13-2  | -0.0446 | 3.91E-01 | 5.24E-01 |
| KRTAP17-1  | 0.1078  | 3.80E-02 | 8.66E-02 |
| KRTAP19-1  | 0.1867  | 3.00E-04 | 1.56E-03 |
| KRTAP19-3  | 0.1805  | 4.77E-04 | 2.28E-03 |
| KRTAP19-4  | 0.1862  | 3.10E-04 | 1.60E-03 |
| KRTAP19-5  | 0.1602  | 1.97E-03 | 7.60E-03 |
| KRTAP19-8  | 0.0470  | 3.67E-01 | 5.00E-01 |
| KRTAP2-1   | 0.0454  | 3.84E-01 | 5.17E-01 |
| KRTAP2-2   | -0.0371 | 4.76E-01 | 6.05E-01 |
| KRTAP20-2  | 0.1696  | 1.04E-03 | 4.44E-03 |
| KRTAP20-4  | 0.2360  | 4.32E-06 | 4.10E-05 |
| KRTAP26-1  | 0.0121  | 8.16E-01 | 8.79E-01 |
| KRTAP3-1   | 0.1563  | 2.53E-03 | 9.37E-03 |
| KRTAP3-2   | 0.1087  | 3.64E-02 | 8.36E-02 |
| KRTAP3-3   | -0.0115 | 8.25E-01 | 8.86E-01 |

|           |         |          |          |
|-----------|---------|----------|----------|
| KRTAP4-11 | -0.0308 | 5.55E-01 | 6.74E-01 |
| KRTAP4-12 | 0.0015  | 9.77E-01 | 9.86E-01 |
| KRTAP4-1  | 0.1666  | 1.28E-03 | 5.31E-03 |
| KRTAP4-2  | 0.0009  | 9.85E-01 | 9.91E-01 |
| KRTAP4-4  | 0.0275  | 5.98E-01 | 7.12E-01 |
| KRTAP4-7  | 0.0556  | 2.85E-01 | 4.14E-01 |
| KRTAP4-8  | 0.0482  | 3.54E-01 | 4.86E-01 |
| KRTAP5-10 | 0.2625  | 2.90E-07 | 3.79E-06 |
| KRTAP5-11 | 0.0745  | 1.52E-01 | 2.56E-01 |
| KRTAP5-1  | 0.1554  | 2.69E-03 | 9.87E-03 |
| KRTAP5-2  | -0.0240 | 6.46E-01 | 7.50E-01 |
| KRTAP5-3  | -0.0469 | 3.67E-01 | 5.00E-01 |
| KRTAP5-4  | 0.0934  | 7.25E-02 | 1.44E-01 |
| KRTAP5-5  | 0.1680  | 1.16E-03 | 4.87E-03 |
| KRTAP5-6  | 0.1272  | 1.42E-02 | 3.91E-02 |
| KRTAP5-7  | 0.1409  | 6.57E-03 | 2.07E-02 |
| KRTAP5-8  | 0.1532  | 3.09E-03 | 1.11E-02 |
| KRTAP5-9  | 0.0781  | 1.33E-01 | 2.32E-01 |
| KRTAP6-3  | 0.2274  | 9.68E-06 | 8.18E-05 |
| KRTAP7-1  | -0.0325 | 5.33E-01 | 6.55E-01 |
| KRTAP8-1  | 0.0232  | 6.56E-01 | 7.58E-01 |
| KRTCAP2   | 0.2873  | 1.76E-08 | 3.09E-07 |
| KRTCAP3   | 0.1589  | 2.14E-03 | 8.13E-03 |
| KRTDAP    | 0.0914  | 7.86E-02 | 1.54E-01 |
| KSR1      | -0.0167 | 7.49E-01 | 8.31E-01 |
| KSR2      | 0.0817  | 1.16E-01 | 2.09E-01 |
| KTELC1    | -0.1503 | 3.71E-03 | 1.29E-02 |
| KTI12     | 0.2669  | 1.80E-07 | 2.47E-06 |
| KTN1      | -0.0255 | 6.24E-01 | 7.33E-01 |
| KYNU      | -0.1305 | 1.18E-02 | 3.35E-02 |
| KY        | 0.0033  | 9.49E-01 | 9.68E-01 |
| L1CAM     | 0.0238  | 6.47E-01 | 7.52E-01 |
| L1TD1     | 0.1527  | 3.20E-03 | 1.14E-02 |
| L2HGDH    | -0.1644 | 1.49E-03 | 6.01E-03 |
| L3MBTL2   | 0.0969  | 6.23E-02 | 1.28E-01 |
| L3MBTL3   | 0.1000  | 5.42E-02 | 1.15E-01 |
| L3MBTL4   | -0.0648 | 2.13E-01 | 3.32E-01 |
| L3MBTL    | 0.4095  | 1.94E-16 | 1.85E-14 |
| LACE1     | -0.0512 | 3.25E-01 | 4.55E-01 |
| LACTB2    | -0.2650 | 2.22E-07 | 2.97E-06 |
| LACTB     | -0.3523 | 2.77E-12 | 1.13E-10 |
| LAD1      | 0.1179  | 2.32E-02 | 5.79E-02 |
| LAG3      | 0.0783  | 1.32E-01 | 2.30E-01 |
| LAGE3     | 0.2055  | 6.65E-05 | 4.31E-04 |

|         |         |          |          |
|---------|---------|----------|----------|
| LAIR1   | 0.0256  | 6.24E-01 | 7.32E-01 |
| LAIR2   | 0.1322  | 1.08E-02 | 3.10E-02 |
| LALBA   | 0.0550  | 2.91E-01 | 4.20E-01 |
| LAMA1   | 0.0360  | 4.89E-01 | 6.17E-01 |
| LAMA2   | -0.1615 | 1.81E-03 | 7.08E-03 |
| LAMA3   | -0.0372 | 4.75E-01 | 6.04E-01 |
| LAMA4   | -0.0556 | 2.85E-01 | 4.14E-01 |
| LAMA5   | 0.0526  | 3.12E-01 | 4.42E-01 |
| LAMB1   | 0.0452  | 3.85E-01 | 5.18E-01 |
| LAMB2L  | 0.1885  | 2.61E-04 | 1.38E-03 |
| LAMB2   | -0.2199 | 1.93E-05 | 1.50E-04 |
| LAMB3   | -0.0019 | 9.70E-01 | 9.81E-01 |
| LAMB4   | 0.0117  | 8.23E-01 | 8.84E-01 |
| LAMC1   | 0.2204  | 1.85E-05 | 1.44E-04 |
| LAMC2   | 0.0194  | 7.09E-01 | 8.01E-01 |
| LAMC3   | -0.1086 | 3.65E-02 | 8.38E-02 |
| LAMP1   | -0.2174 | 2.41E-05 | 1.82E-04 |
| LAMP2   | -0.1168 | 2.45E-02 | 6.05E-02 |
| LAMP3   | 0.1364  | 8.52E-03 | 2.56E-02 |
| LANCL1  | 0.0451  | 3.86E-01 | 5.19E-01 |
| LANCL2  | -0.0976 | 6.05E-02 | 1.25E-01 |
| LANCL3  | -0.0185 | 7.22E-01 | 8.12E-01 |
| LAP3    | -0.2709 | 1.16E-07 | 1.67E-06 |
| LAPTM4A | -0.2656 | 2.07E-07 | 2.80E-06 |
| LAPTM4B | 0.2121  | 3.83E-05 | 2.70E-04 |
| LAPTM5  | -0.0284 | 5.86E-01 | 7.01E-01 |
| LARGE   | -0.0862 | 9.73E-02 | 1.82E-01 |
| LARP1B  | -0.2314 | 6.66E-06 | 5.93E-05 |
| LARP1   | 0.0734  | 1.58E-01 | 2.64E-01 |
| LARP4B  | 0.2943  | 7.59E-09 | 1.45E-07 |
| LARP4   | -0.2671 | 1.76E-07 | 2.42E-06 |
| LARP6   | 0.0714  | 1.70E-01 | 2.79E-01 |
| LARP7   | -0.1170 | 2.43E-02 | 6.00E-02 |
| LARS2   | -0.1949 | 1.58E-04 | 9.01E-04 |
| LARS    | 0.1354  | 9.01E-03 | 2.69E-02 |
| LAS1L   | 0.1839  | 3.71E-04 | 1.86E-03 |
| LASP1   | 0.2052  | 6.86E-05 | 4.43E-04 |
| LASS1   | 0.1543  | 2.89E-03 | 1.05E-02 |
| LASS2   | 0.2249  | 1.23E-05 | 1.00E-04 |
| LASS3   | 0.2084  | 5.21E-05 | 3.51E-04 |
| LASS4   | -0.2025 | 8.54E-05 | 5.33E-04 |
| LASS5   | 0.3652  | 3.79E-13 | 1.82E-11 |
| LASS6   | 0.0451  | 3.86E-01 | 5.19E-01 |
| LAT2    | -0.0454 | 3.83E-01 | 5.16E-01 |

|         |         |          |          |
|---------|---------|----------|----------|
| LATS1   | 0.0954  | 6.65E-02 | 1.35E-01 |
| LATS2   | -0.1512 | 3.52E-03 | 1.24E-02 |
| LAT     | 0.0919  | 7.71E-02 | 1.51E-01 |
| LAX1    | -0.0561 | 2.81E-01 | 4.10E-01 |
| LAYN    | 0.0114  | 8.26E-01 | 8.86E-01 |
| LBH     | -0.0541 | 2.99E-01 | 4.28E-01 |
| LBP     | -0.1459 | 4.86E-03 | 1.61E-02 |
| LBR     | 0.3812  | 2.80E-14 | 1.66E-12 |
| LBX1    | 0.0934  | 7.22E-02 | 1.44E-01 |
| LBX2    | -0.0940 | 7.04E-02 | 1.41E-01 |
| LBXCOR1 | 0.0132  | 8.01E-01 | 8.68E-01 |
| LCA5L   | -0.0037 | 9.44E-01 | 9.65E-01 |
| LCA5    | 0.0250  | 6.31E-01 | 7.38E-01 |
| LCAT    | -0.2691 | 1.42E-07 | 1.99E-06 |
| LCE1B   | 0.0849  | 1.03E-01 | 1.89E-01 |
| LCE1C   | 0.1320  | 1.09E-02 | 3.14E-02 |
| LCE1D   | -0.0191 | 7.14E-01 | 8.05E-01 |
| LCE1E   | 0.1813  | 4.49E-04 | 2.17E-03 |
| LCE1F   | 0.0560  | 2.82E-01 | 4.11E-01 |
| LCE2A   | 0.0499  | 3.38E-01 | 4.69E-01 |
| LCE2B   | 0.0418  | 4.22E-01 | 5.54E-01 |
| LCE2C   | 0.0308  | 5.55E-01 | 6.74E-01 |
| LCE2D   | 0.0481  | 3.55E-01 | 4.88E-01 |
| LCE3A   | -0.0065 | 9.00E-01 | 9.37E-01 |
| LCE3C   | -0.0335 | 5.20E-01 | 6.44E-01 |
| LCE3D   | -0.0994 | 5.58E-02 | 1.17E-01 |
| LCE3E   | -0.0824 | 1.13E-01 | 2.05E-01 |
| LCE5A   | 0.0411  | 4.30E-01 | 5.62E-01 |
| LCE6A   | 0.0950  | 6.75E-02 | 1.36E-01 |
| LCK     | -0.0528 | 3.11E-01 | 4.40E-01 |
| LCLAT1  | 0.1108  | 3.29E-02 | 7.71E-02 |
| LCMT1   | 0.1528  | 3.18E-03 | 1.13E-02 |
| LCMT2   | 0.0377  | 4.69E-01 | 5.99E-01 |
| LCN10   | 0.0046  | 9.30E-01 | 9.56E-01 |
| LCN12   | -0.0160 | 7.59E-01 | 8.38E-01 |
| LCN15   | 0.0787  | 1.30E-01 | 2.27E-01 |
| LCN1    | 0.1200  | 2.08E-02 | 5.30E-02 |
| LCN2    | -0.0136 | 7.95E-01 | 8.64E-01 |
| LCN6    | -0.1175 | 2.36E-02 | 5.88E-02 |
| LCN8    | -0.0475 | 3.61E-01 | 4.94E-01 |
| LCNL1   | 0.0838  | 1.07E-01 | 1.96E-01 |
| LCORL   | 0.0146  | 7.79E-01 | 8.52E-01 |
| LCOR    | -0.0379 | 4.67E-01 | 5.97E-01 |
| LCP1    | -0.0716 | 1.69E-01 | 2.78E-01 |

|          |         |          |          |
|----------|---------|----------|----------|
| LCP2     | -0.0876 | 9.22E-02 | 1.74E-01 |
| LCTL     | 0.1604  | 1.94E-03 | 7.49E-03 |
| LCT      | 0.0947  | 6.83E-02 | 1.38E-01 |
| LDB1     | 0.0922  | 7.61E-02 | 1.50E-01 |
| LDB2     | -0.2830 | 2.90E-08 | 4.79E-07 |
| LDB3     | -0.1023 | 4.88E-02 | 1.06E-01 |
| LDHAL6A  | 0.0661  | 2.04E-01 | 3.21E-01 |
| LDHAL6B  | 0.0949  | 6.80E-02 | 1.37E-01 |
| LDHA     | -0.1244 | 1.65E-02 | 4.40E-02 |
| LDHB     | -0.0399 | 4.44E-01 | 5.75E-01 |
| LDHC     | -0.0231 | 6.57E-01 | 7.59E-01 |
| LDHD     | -0.4092 | 2.06E-16 | 1.92E-14 |
| LDLRAD1  | 0.0534  | 3.05E-01 | 4.34E-01 |
| LDLRAD2  | -0.0644 | 2.16E-01 | 3.36E-01 |
| LDLRAD3  | -0.0891 | 8.66E-02 | 1.66E-01 |
| LDLRAP1  | -0.0516 | 3.22E-01 | 4.52E-01 |
| LDLR     | -0.2458 | 1.65E-06 | 1.76E-05 |
| LDOC1L   | 0.0764  | 1.42E-01 | 2.43E-01 |
| LDOC1    | 0.1366  | 8.44E-03 | 2.55E-02 |
| LEAP2    | -0.1786 | 5.46E-04 | 2.56E-03 |
| LECT1    | 0.0599  | 2.50E-01 | 3.75E-01 |
| LECT2    | -0.2104 | 4.41E-05 | 3.04E-04 |
| LEF1     | -0.0262 | 6.15E-01 | 7.25E-01 |
| LEFTY1   | 0.1854  | 3.32E-04 | 1.70E-03 |
| LEFTY2   | 0.1082  | 3.72E-02 | 8.51E-02 |
| LEKR1    | 0.0299  | 5.66E-01 | 6.83E-01 |
| LELP1    | 0.0508  | 3.29E-01 | 4.60E-01 |
| LEMD1    | 0.0393  | 4.51E-01 | 5.82E-01 |
| LEMD2    | 0.2343  | 5.07E-06 | 4.69E-05 |
| LEMD3    | 0.1479  | 4.30E-03 | 1.46E-02 |
| LENEP    | 0.2131  | 3.48E-05 | 2.49E-04 |
| LENG1    | 0.0701  | 1.78E-01 | 2.89E-01 |
| LENG8    | 0.2787  | 4.82E-08 | 7.54E-07 |
| LENG9    | 0.0130  | 8.02E-01 | 8.70E-01 |
| LEO1     | 0.0559  | 2.83E-01 | 4.12E-01 |
| LEPRE1   | 0.1732  | 8.06E-04 | 3.57E-03 |
| LEPREL1  | -0.0728 | 1.62E-01 | 2.69E-01 |
| LEPREL2  | -0.0410 | 4.31E-01 | 5.63E-01 |
| LEPROTL1 | -0.0215 | 6.80E-01 | 7.78E-01 |
| LEPROT   | -0.1201 | 2.06E-02 | 5.27E-02 |
| LEPR     | -0.2487 | 1.24E-06 | 1.37E-05 |
| LEP      | -0.0984 | 5.82E-02 | 1.21E-01 |
| LETM1    | -0.0436 | 4.02E-01 | 5.35E-01 |
| LETM2    | 0.0923  | 7.59E-02 | 1.50E-01 |

|          |         |          |          |
|----------|---------|----------|----------|
| LETMD1   | -0.0737 | 1.56E-01 | 2.62E-01 |
| LEUTX    | 0.0418  | 4.23E-01 | 5.55E-01 |
| LFNG     | -0.0455 | 3.82E-01 | 5.15E-01 |
| LGALS12  | 0.0355  | 4.95E-01 | 6.21E-01 |
| LGALS13  | 0.0951  | 6.72E-02 | 1.36E-01 |
| LGALS14  | 0.2319  | 6.38E-06 | 5.71E-05 |
| LGALS1   | -0.0084 | 8.72E-01 | 9.18E-01 |
| LGALS2   | 0.0789  | 1.29E-01 | 2.26E-01 |
| LGALS3BP | 0.0797  | 1.26E-01 | 2.22E-01 |
| LGALS3   | 0.1096  | 3.49E-02 | 8.08E-02 |
| LGALS4   | 0.1203  | 2.05E-02 | 5.24E-02 |
| LGALS7B  | 0.0644  | 2.16E-01 | 3.36E-01 |
| LGALS7   | 0.0591  | 2.56E-01 | 3.82E-01 |
| LGALS8   | 0.0438  | 4.00E-01 | 5.33E-01 |
| LGALS9B  | 0.0124  | 8.11E-01 | 8.76E-01 |
| LGALS9C  | 0.0283  | 5.88E-01 | 7.03E-01 |
| LGALS9   | 0.0309  | 5.52E-01 | 6.72E-01 |
| LGI1     | -0.0499 | 3.37E-01 | 4.69E-01 |
| LGI2     | 0.0534  | 3.05E-01 | 4.34E-01 |
| LGI3     | -0.1388 | 7.42E-03 | 2.28E-02 |
| LGI4     | 0.0601  | 2.48E-01 | 3.73E-01 |
| LGMN     | -0.1661 | 1.33E-03 | 5.45E-03 |
| LGR4     | -0.0299 | 5.66E-01 | 6.83E-01 |
| LGR5     | -0.0145 | 7.80E-01 | 8.53E-01 |
| LGR6     | 0.0041  | 9.38E-01 | 9.61E-01 |
| LGSN     | -0.1898 | 2.36E-04 | 1.27E-03 |
| LGTN     | 0.1760  | 6.60E-04 | 3.01E-03 |
| LHB      | 0.0744  | 1.53E-01 | 2.57E-01 |
| LHCGR    | -0.1135 | 2.89E-02 | 6.94E-02 |
| LHFPL1   | -0.0186 | 7.21E-01 | 8.10E-01 |
| LHFPL2   | 0.1190  | 2.19E-02 | 5.52E-02 |
| LHFPL3   | 0.2921  | 9.89E-09 | 1.84E-07 |
| LHFPL4   | 0.2257  | 1.14E-05 | 9.40E-05 |
| LHFPL5   | 0.0917  | 7.76E-02 | 1.52E-01 |
| LHFP     | -0.1085 | 3.67E-02 | 8.43E-02 |
| LHPP     | -0.3662 | 3.22E-13 | 1.57E-11 |
| LHX1     | 0.0674  | 1.95E-01 | 3.11E-01 |
| LHX2     | 0.0747  | 1.51E-01 | 2.55E-01 |
| LHX3     | -0.1201 | 2.07E-02 | 5.27E-02 |
| LHX4     | 0.3382  | 2.22E-11 | 7.47E-10 |
| LHX5     | 0.0476  | 3.61E-01 | 4.93E-01 |
| LHX6     | -0.1969 | 1.36E-04 | 7.91E-04 |
| LHX8     | 0.1302  | 1.21E-02 | 3.41E-02 |
| LHX9     | -0.0253 | 6.27E-01 | 7.35E-01 |

|               |         |          |          |
|---------------|---------|----------|----------|
| LIAS          | -0.1904 | 2.25E-04 | 1.22E-03 |
| LIFR          | -0.0455 | 3.82E-01 | 5.15E-01 |
| LIF           | 0.0380  | 4.65E-01 | 5.95E-01 |
| LIG1          | 0.4223  | 1.76E-17 | 2.20E-15 |
| LIG3          | 0.2691  | 1.41E-07 | 1.99E-06 |
| LIG4          | -0.0274 | 5.99E-01 | 7.12E-01 |
| LILRA1        | -0.1286 | 1.32E-02 | 3.66E-02 |
| LILRA2        | -0.2145 | 3.09E-05 | 2.24E-04 |
| LILRA3        | -0.0785 | 1.31E-01 | 2.29E-01 |
| LILRA4        | -0.1097 | 3.47E-02 | 8.04E-02 |
| LILRA5        | -0.1540 | 2.94E-03 | 1.06E-02 |
| LILRA6        | -0.0639 | 2.20E-01 | 3.40E-01 |
| LILRB1        | -0.0896 | 8.47E-02 | 1.63E-01 |
| LILRB2        | -0.1067 | 3.99E-02 | 9.00E-02 |
| LILRB3        | -0.0177 | 7.34E-01 | 8.20E-01 |
| LILRB4        | -0.0321 | 5.38E-01 | 6.60E-01 |
| LILRB5        | -0.2563 | 5.63E-07 | 6.76E-06 |
| LILRP2        | 0.0222  | 6.70E-01 | 7.70E-01 |
| LIM2          | 0.0325  | 5.33E-01 | 6.55E-01 |
| LIMA1         | 0.0389  | 4.55E-01 | 5.86E-01 |
| LIMCH1        | -0.0231 | 6.57E-01 | 7.59E-01 |
| LIMD1         | 0.0482  | 3.55E-01 | 4.87E-01 |
| LIMD2         | 0.1148  | 2.70E-02 | 6.56E-02 |
| LIME1         | -0.1851 | 3.37E-04 | 1.72E-03 |
| LIMK1         | 0.1403  | 6.81E-03 | 2.13E-02 |
| LIMK2         | 0.1777  | 5.83E-04 | 2.70E-03 |
| LIMS1         | -0.0404 | 4.38E-01 | 5.69E-01 |
| LIMS2         | -0.1860 | 3.15E-04 | 1.63E-03 |
| LIMS3-LOC4408 | -0.0065 | 9.01E-01 | 9.37E-01 |
| LIMS3         | -0.0275 | 5.98E-01 | 7.12E-01 |
| LIN28A        | 0.0046  | 9.30E-01 | 9.56E-01 |
| LIN28B        | 0.0824  | 1.13E-01 | 2.05E-01 |
| LIN37         | 0.1960  | 1.44E-04 | 8.37E-04 |
| LIN52         | 0.0239  | 6.46E-01 | 7.51E-01 |
| LIN54         | 0.0218  | 6.76E-01 | 7.74E-01 |
| LIN7A         | -0.2355 | 4.54E-06 | 4.28E-05 |
| LIN7B         | 0.0938  | 7.13E-02 | 1.42E-01 |
| LIN7C         | -0.1935 | 1.77E-04 | 9.91E-04 |
| LIN9          | 0.4600  | 7.97E-21 | 2.27E-18 |
| LINGO1        | 0.0486  | 3.51E-01 | 4.83E-01 |
| LINGO2        | -0.0586 | 2.60E-01 | 3.86E-01 |
| LINGO3        | -0.0540 | 3.00E-01 | 4.29E-01 |
| LINGO4        | 0.0085  | 8.70E-01 | 9.16E-01 |
| LINS1         | 0.1409  | 6.55E-03 | 2.06E-02 |

|        |         |          |          |
|--------|---------|----------|----------|
| LIPA   | -0.2224 | 1.53E-05 | 1.22E-04 |
| LIPC   | -0.2327 | 5.92E-06 | 5.36E-05 |
| LIPE   | -0.1146 | 2.73E-02 | 6.62E-02 |
| LIPF   | 0.0503  | 3.34E-01 | 4.65E-01 |
| LIPG   | -0.1096 | 3.49E-02 | 8.08E-02 |
| LIPH   | 0.0241  | 6.44E-01 | 7.49E-01 |
| LIPI   | -0.0151 | 7.72E-01 | 8.47E-01 |
| LIPJ   | -0.0740 | 1.55E-01 | 2.60E-01 |
| LIPK   | -0.0466 | 3.71E-01 | 5.04E-01 |
| LIPM   | -0.0220 | 6.73E-01 | 7.72E-01 |
| LIPN   | -0.0608 | 2.43E-01 | 3.67E-01 |
| LIPT1  | 0.1513  | 3.49E-03 | 1.23E-02 |
| LIPT2  | 0.0454  | 3.84E-01 | 5.17E-01 |
| LITAF  | -0.0893 | 8.59E-02 | 1.65E-01 |
| LIX1L  | 0.3240  | 1.62E-10 | 4.58E-09 |
| LIX1   | -0.0074 | 8.87E-01 | 9.28E-01 |
| LLGL1  | 0.0964  | 6.38E-02 | 1.30E-01 |
| LLGL2  | 0.2226  | 1.50E-05 | 1.20E-04 |
| LLPH   | 0.1470  | 4.55E-03 | 1.53E-02 |
| LMAN1L | 0.0557  | 2.85E-01 | 4.14E-01 |
| LMAN1  | -0.1384 | 7.58E-03 | 2.32E-02 |
| LMAN2L | 0.0897  | 8.44E-02 | 1.62E-01 |
| LMAN2  | -0.0620 | 2.34E-01 | 3.57E-01 |
| LMBR1L | 0.1378  | 7.85E-03 | 2.40E-02 |
| LMBR1  | -0.1235 | 1.73E-02 | 4.57E-02 |
| LMBRD1 | -0.0686 | 1.87E-01 | 3.01E-01 |
| LMBRD2 | -0.0090 | 8.64E-01 | 9.12E-01 |
| LMCD1  | 0.0392  | 4.52E-01 | 5.83E-01 |
| LMF1   | -0.2100 | 4.57E-05 | 3.13E-04 |
| LMF2   | 0.0662  | 2.03E-01 | 3.21E-01 |
| LMLN   | -0.0210 | 6.87E-01 | 7.83E-01 |
| LMNA   | 0.3288  | 8.41E-11 | 2.50E-09 |
| LMNB1  | 0.3810  | 2.89E-14 | 1.71E-12 |
| LMNB2  | 0.3714  | 1.40E-13 | 7.35E-12 |
| LMO1   | 0.0251  | 6.30E-01 | 7.38E-01 |
| LMO2   | -0.1678 | 1.18E-03 | 4.95E-03 |
| LMO3   | 0.0667  | 2.00E-01 | 3.17E-01 |
| LMO4   | 0.0503  | 3.34E-01 | 4.65E-01 |
| LMO7   | -0.1500 | 3.77E-03 | 1.31E-02 |
| LMOD1  | -0.2069 | 5.95E-05 | 3.92E-04 |
| LMOD2  | -0.1016 | 5.05E-02 | 1.08E-01 |
| LMOD3  | -0.0745 | 1.52E-01 | 2.56E-01 |
| LMTK2  | -0.0404 | 4.37E-01 | 5.69E-01 |
| LMTK3  | 0.0990  | 5.67E-02 | 1.19E-01 |



|              |         |          |          |
|--------------|---------|----------|----------|
| LMX1A        | 0.1531  | 3.11E-03 | 1.11E-02 |
| LMX1B        | 0.1257  | 1.54E-02 | 4.15E-02 |
| LNP1         | -0.1165 | 2.49E-02 | 6.12E-02 |
| LNPEP        | -0.0692 | 1.83E-01 | 2.96E-01 |
| LNx1         | 0.0378  | 4.68E-01 | 5.98E-01 |
| LNx2         | -0.1102 | 3.38E-02 | 7.89E-02 |
| LOC100009676 | 0.0056  | 9.15E-01 | 9.47E-01 |
| LOC100101266 | 0.1011  | 5.16E-02 | 1.10E-01 |
| LOC100101938 | 0.0308  | 5.54E-01 | 6.74E-01 |
| LOC100124692 | 0.1283  | 1.34E-02 | 3.71E-02 |
| LOC100125556 | 0.2098  | 4.64E-05 | 3.17E-04 |
| LOC100126784 | -0.1073 | 3.89E-02 | 8.82E-02 |
| LOC100127888 | 0.1628  | 1.65E-03 | 6.57E-03 |
| LOC100128023 | 0.0820  | 1.15E-01 | 2.07E-01 |
| LOC100128076 | 0.0266  | 6.10E-01 | 7.21E-01 |
| LOC100128164 | 0.0738  | 1.56E-01 | 2.62E-01 |
| LOC100128191 | 0.3045  | 2.12E-09 | 4.65E-08 |
| LOC100128239 | 0.0290  | 5.78E-01 | 6.95E-01 |
| LOC100128288 | 0.0629  | 2.27E-01 | 3.48E-01 |
| LOC100128292 | 0.1184  | 2.25E-02 | 5.65E-02 |
| LOC100128542 | -0.0642 | 2.18E-01 | 3.38E-01 |
| LOC100128554 | 0.0531  | 3.08E-01 | 4.37E-01 |
| LOC100128573 | 0.0773  | 1.37E-01 | 2.37E-01 |
| LOC100128640 | -0.0867 | 9.53E-02 | 1.79E-01 |
| LOC100128675 | 0.0305  | 5.58E-01 | 6.77E-01 |
| LOC100128788 | 0.0711  | 1.72E-01 | 2.81E-01 |
| LOC100128811 | -0.0249 | 6.33E-01 | 7.40E-01 |
| LOC100128822 | 0.0747  | 1.51E-01 | 2.55E-01 |
| LOC100128842 | 0.1479  | 4.30E-03 | 1.46E-02 |
| LOC100128977 | -0.0565 | 2.78E-01 | 4.07E-01 |
| LOC100129034 | 0.0289  | 5.79E-01 | 6.95E-01 |
| LOC100129055 | 0.1714  | 9.19E-04 | 4.00E-03 |
| LOC100129066 | -0.0021 | 9.68E-01 | 9.80E-01 |
| LOC100129387 | -0.2163 | 2.65E-05 | 1.97E-04 |
| LOC100129534 | 0.0058  | 9.11E-01 | 9.44E-01 |
| LOC100129550 | 0.1869  | 2.96E-04 | 1.54E-03 |
| LOC100129637 | 0.1777  | 5.83E-04 | 2.70E-03 |
| LOC100129716 | 0.0111  | 8.31E-01 | 8.89E-01 |
| LOC100129726 | 0.0606  | 2.45E-01 | 3.69E-01 |
| LOC100129935 | 0.0752  | 1.48E-01 | 2.52E-01 |
| LOC100130015 | -0.1650 | 1.43E-03 | 5.79E-03 |
| LOC100130093 | -0.0964 | 6.36E-02 | 1.30E-01 |
| LOC100130148 | 0.2085  | 5.19E-05 | 3.50E-04 |
| LOC100130238 | 0.0452  | 3.85E-01 | 5.18E-01 |

|              |         |          |          |
|--------------|---------|----------|----------|
| LOC100130264 | 0.0004  | 9.94E-01 | 9.96E-01 |
| LOC100130274 | 0.1699  | 1.02E-03 | 4.37E-03 |
| LOC100130331 | 0.0111  | 8.31E-01 | 8.89E-01 |
| LOC100130386 | -0.0580 | 2.65E-01 | 3.92E-01 |
| LOC100130522 | 0.2097  | 4.68E-05 | 3.20E-04 |
| LOC100130557 | 0.2007  | 9.90E-05 | 6.04E-04 |
| LOC100130581 | 0.0000  | 1.00E+00 | 1.00E+00 |
| LOC100130691 | 0.1604  | 1.94E-03 | 7.52E-03 |
| LOC100130776 | -0.0712 | 1.71E-01 | 2.80E-01 |
| LOC100130872 | 0.0006  | 9.90E-01 | 9.94E-01 |
| LOC100130932 | 0.2217  | 1.63E-05 | 1.29E-04 |
| LOC100130933 | 0.0405  | 4.37E-01 | 5.68E-01 |
| LOC100130987 | 0.0191  | 7.13E-01 | 8.04E-01 |
| LOC100131193 | -0.0758 | 1.45E-01 | 2.47E-01 |
| LOC100131434 | 0.2810  | 3.68E-08 | 5.92E-07 |
| LOC100131496 | -0.1027 | 4.80E-02 | 1.04E-01 |
| LOC100131551 | 0.0539  | 3.00E-01 | 4.30E-01 |
| LOC100131691 | -0.0552 | 2.89E-01 | 4.18E-01 |
| LOC100131726 | -0.1781 | 5.66E-04 | 2.64E-03 |
| LOC100132111 | 0.1447  | 5.23E-03 | 1.71E-02 |
| LOC100132215 | 0.0671  | 1.97E-01 | 3.14E-01 |
| LOC100132247 | 0.1539  | 2.96E-03 | 1.07E-02 |
| LOC100132287 | 0.1814  | 4.45E-04 | 2.15E-03 |
| LOC100132288 | 0.0246  | 6.37E-01 | 7.43E-01 |
| LOC100132354 | 0.0502  | 3.35E-01 | 4.66E-01 |
| LOC100132707 | -0.1618 | 1.77E-03 | 6.95E-03 |
| LOC100132724 | 0.0768  | 1.40E-01 | 2.41E-01 |
| LOC100132831 | 0.0129  | 8.04E-01 | 8.70E-01 |
| LOC100132832 | -0.0020 | 9.69E-01 | 9.81E-01 |
| LOC100133050 | -0.0358 | 4.92E-01 | 6.19E-01 |
| LOC100133161 | 0.2000  | 1.05E-04 | 6.35E-04 |
| LOC100133308 | 0.0767  | 1.40E-01 | 2.41E-01 |
| LOC100133331 | 0.0987  | 5.74E-02 | 1.20E-01 |
| LOC100133469 | 0.0347  | 5.06E-01 | 6.30E-01 |
| LOC100133545 | 0.1143  | 2.77E-02 | 6.70E-02 |
| LOC100133612 | 0.0518  | 3.20E-01 | 4.50E-01 |
| LOC100133669 | 0.0703  | 1.77E-01 | 2.88E-01 |
| LOC100133893 | 0.1685  | 1.13E-03 | 4.76E-03 |
| LOC100133920 | 0.0176  | 7.35E-01 | 8.21E-01 |
| LOC100133957 | 0.0027  | 9.59E-01 | 9.74E-01 |
| LOC100133985 | -0.1336 | 1.00E-02 | 2.92E-02 |
| LOC100133991 | 0.1494  | 3.93E-03 | 1.35E-02 |
| LOC100134229 | -0.0417 | 4.24E-01 | 5.56E-01 |
| LOC100134259 | 0.0509  | 3.28E-01 | 4.59E-01 |

|              |         |          |          |
|--------------|---------|----------|----------|
| LOC100134368 | 0.1673  | 1.22E-03 | 5.07E-03 |
| LOC100134713 | -0.0267 | 6.08E-01 | 7.20E-01 |
| LOC100134868 | -0.0632 | 2.25E-01 | 3.46E-01 |
| LOC100144603 | -0.0103 | 8.44E-01 | 8.98E-01 |
| LOC100144604 | 0.0699  | 1.79E-01 | 2.90E-01 |
| LOC100170939 | 0.1357  | 8.86E-03 | 2.65E-02 |
| LOC100188947 | 0.1163  | 2.51E-02 | 6.17E-02 |
| LOC100188949 | -0.0545 | 2.95E-01 | 4.24E-01 |
| LOC100189589 | 0.0591  | 2.56E-01 | 3.82E-01 |
| LOC100190938 | 0.0861  | 9.76E-02 | 1.83E-01 |
| LOC100190939 | -0.0135 | 7.95E-01 | 8.64E-01 |
| LOC100190940 | -0.0609 | 2.42E-01 | 3.67E-01 |
| LOC100190986 | 0.0954  | 6.65E-02 | 1.35E-01 |
| LOC100192378 | -0.0061 | 9.06E-01 | 9.41E-01 |
| LOC100192379 | 0.0946  | 6.89E-02 | 1.38E-01 |
| LOC100192426 | 0.0458  | 3.79E-01 | 5.12E-01 |
| LOC100216001 | 0.0152  | 7.70E-01 | 8.45E-01 |
| LOC100216545 | 0.0860  | 9.82E-02 | 1.83E-01 |
| LOC100233209 | -0.0476 | 3.60E-01 | 4.93E-01 |
| LOC100240726 | 0.0412  | 4.29E-01 | 5.61E-01 |
| LOC100240734 | 0.0010  | 9.85E-01 | 9.90E-01 |
| LOC100240735 | -0.0071 | 8.91E-01 | 9.30E-01 |
| LOC100268168 | 0.0955  | 6.63E-02 | 1.34E-01 |
| LOC100270710 | -0.0092 | 8.60E-01 | 9.10E-01 |
| LOC100270746 | 0.0486  | 3.51E-01 | 4.83E-01 |
| LOC100270804 | 0.2621  | 3.03E-07 | 3.94E-06 |
| LOC100271722 | 0.0597  | 2.51E-01 | 3.76E-01 |
| LOC100271831 | 0.0232  | 6.56E-01 | 7.58E-01 |
| LOC100271832 | 0.1155  | 2.61E-02 | 6.39E-02 |
| LOC100271836 | 0.1005  | 5.31E-02 | 1.13E-01 |
| LOC100272146 | 0.2937  | 8.10E-09 | 1.53E-07 |
| LOC100272216 | -0.0672 | 1.97E-01 | 3.13E-01 |
| LOC100272217 | 0.1167  | 2.46E-02 | 6.07E-02 |
| LOC100272228 | 0.3226  | 1.98E-10 | 5.50E-09 |
| LOC100286793 | 0.3569  | 1.37E-12 | 5.95E-11 |
| LOC100286844 | 0.0550  | 2.91E-01 | 4.20E-01 |
| LOC100287227 | 0.0217  | 6.77E-01 | 7.76E-01 |
| LOC100287704 | 0.0396  | 4.47E-01 | 5.79E-01 |
| LOC100287718 | 0.0844  | 1.05E-01 | 1.92E-01 |
| LOC100288778 | 0.3159  | 4.84E-10 | 1.23E-08 |
| LOC100289341 | -0.0971 | 6.17E-02 | 1.27E-01 |
| LOC100302401 | 0.0890  | 8.70E-02 | 1.66E-01 |
| LOC100302640 | 0.0575  | 2.69E-01 | 3.97E-01 |
| LOC100302650 | -0.1399 | 6.94E-03 | 2.16E-02 |

|              |         |          |          |
|--------------|---------|----------|----------|
| LOC100303728 | -0.0317 | 5.43E-01 | 6.64E-01 |
| LOC113230    | -0.0183 | 7.25E-01 | 8.13E-01 |
| LOC115110    | 0.0290  | 5.78E-01 | 6.95E-01 |
| LOC116437    | -0.1314 | 1.13E-02 | 3.23E-02 |
| LOC121838    | 0.0213  | 6.83E-01 | 7.80E-01 |
| LOC121952    | -0.1618 | 1.77E-03 | 6.97E-03 |
| LOC126536    | 0.1759  | 6.64E-04 | 3.03E-03 |
| LOC127841    | 0.3540  | 2.15E-12 | 8.93E-11 |
| LOC134466    | 0.1355  | 8.98E-03 | 2.68E-02 |
| LOC143188    | -0.0237 | 6.49E-01 | 7.53E-01 |
| LOC143666    | 0.0202  | 6.98E-01 | 7.91E-01 |
| LOC144438    | 0.2089  | 5.02E-05 | 3.40E-04 |
| LOC144486    | 0.2151  | 2.95E-05 | 2.16E-04 |
| LOC144571    | 0.0303  | 5.61E-01 | 6.79E-01 |
| LOC144742    | -0.0803 | 1.22E-01 | 2.18E-01 |
| LOC144776    | 0.1265  | 1.48E-02 | 4.02E-02 |
| LOC145474    | 0.0289  | 5.79E-01 | 6.96E-01 |
| LOC145783    | 0.1127  | 3.00E-02 | 7.15E-02 |
| LOC145820    | -0.2459 | 1.63E-06 | 1.75E-05 |
| LOC145837    | -0.0134 | 7.96E-01 | 8.65E-01 |
| LOC145845    | 0.0767  | 1.41E-01 | 2.41E-01 |
| LOC146336    | 0.1578  | 2.31E-03 | 8.67E-03 |
| LOC146481    | -0.0113 | 8.28E-01 | 8.88E-01 |
| LOC146880    | 0.4167  | 5.17E-17 | 5.51E-15 |
| LOC147727    | 0.0392  | 4.51E-01 | 5.82E-01 |
| LOC147804    | 0.2730  | 9.21E-08 | 1.35E-06 |
| LOC148145    | -0.0467 | 3.70E-01 | 5.03E-01 |
| LOC148189    | -0.0287 | 5.82E-01 | 6.98E-01 |
| LOC148413    | -0.1069 | 3.97E-02 | 8.96E-02 |
| LOC148696    | -0.0322 | 5.36E-01 | 6.58E-01 |
| LOC148709    | 0.0824  | 1.13E-01 | 2.05E-01 |
| LOC148824    | 0.1098  | 3.46E-02 | 8.02E-02 |
| LOC149134    | 0.2933  | 8.50E-09 | 1.60E-07 |
| LOC149620    | 0.0850  | 1.02E-01 | 1.89E-01 |
| LOC149837    | 0.1445  | 5.30E-03 | 1.73E-02 |
| LOC150185    | 0.0720  | 1.66E-01 | 2.74E-01 |
| LOC150197    | 0.1618  | 1.76E-03 | 6.93E-03 |
| LOC150381    | 0.1046  | 4.41E-02 | 9.73E-02 |
| LOC150527    | 0.1111  | 3.24E-02 | 7.60E-02 |
| LOC150568    | 0.0887  | 8.81E-02 | 1.68E-01 |
| LOC150622    | 0.0547  | 2.93E-01 | 4.22E-01 |
| LOC150776    | 0.3555  | 1.70E-12 | 7.24E-11 |
| LOC150786    | -0.0613 | 2.39E-01 | 3.63E-01 |
| LOC151009    | 0.2327  | 5.93E-06 | 5.36E-05 |

|           |         |          |          |
|-----------|---------|----------|----------|
| LOC151162 | 0.1196  | 2.13E-02 | 5.39E-02 |
| LOC151174 | 0.0659  | 2.06E-01 | 3.23E-01 |
| LOC151300 | 0.0086  | 8.69E-01 | 9.16E-01 |
| LOC151534 | -0.1540 | 2.94E-03 | 1.06E-02 |
| LOC151658 | 0.0529  | 3.09E-01 | 4.39E-01 |
| LOC152024 | 0.0803  | 1.22E-01 | 2.18E-01 |
| LOC152217 | 0.0899  | 8.36E-02 | 1.61E-01 |
| LOC152225 | -0.0227 | 6.63E-01 | 7.64E-01 |
| LOC153328 | -0.1157 | 2.58E-02 | 6.32E-02 |
| LOC153684 | 0.1070  | 3.94E-02 | 8.91E-02 |
| LOC153910 | 0.0914  | 7.86E-02 | 1.54E-01 |
| LOC154449 | -0.0653 | 2.10E-01 | 3.28E-01 |
| LOC154761 | -0.0295 | 5.71E-01 | 6.89E-01 |
| LOC154822 | 0.0276  | 5.96E-01 | 7.10E-01 |
| LOC157381 | -0.0167 | 7.48E-01 | 8.30E-01 |
| LOC157627 | 0.0151  | 7.71E-01 | 8.46E-01 |
| LOC158376 | -0.1730 | 8.19E-04 | 3.62E-03 |
| LOC158572 | 0.0172  | 7.41E-01 | 8.25E-01 |
| LOC158696 | 0.1420  | 6.15E-03 | 1.95E-02 |
| LOC162632 | 0.0373  | 4.73E-01 | 6.02E-01 |
| LOC168474 | 0.2033  | 8.02E-05 | 5.05E-04 |
| LOC200030 | 0.2350  | 4.77E-06 | 4.46E-05 |
| LOC200726 | 0.0344  | 5.09E-01 | 6.33E-01 |
| LOC201651 | -0.2033 | 7.99E-05 | 5.04E-04 |
| LOC202181 | 0.1332  | 1.02E-02 | 2.98E-02 |
| LOC202781 | -0.0479 | 3.57E-01 | 4.89E-01 |
| LOC219347 | 0.0799  | 1.24E-01 | 2.20E-01 |
| LOC220429 | -0.0548 | 2.93E-01 | 4.22E-01 |
| LOC220594 | 0.0423  | 4.17E-01 | 5.49E-01 |
| LOC220729 | 0.1588  | 2.16E-03 | 8.20E-03 |
| LOC220930 | 0.0966  | 6.32E-02 | 1.29E-01 |
| LOC221122 | -0.0261 | 6.16E-01 | 7.26E-01 |
| LOC221442 | 0.1706  | 9.72E-04 | 4.20E-03 |
| LOC221710 | 0.0449  | 3.89E-01 | 5.22E-01 |
| LOC222699 | 0.1347  | 9.38E-03 | 2.78E-02 |
| LOC253039 | 0.3161  | 4.73E-10 | 1.21E-08 |
| LOC253724 | 0.0532  | 3.07E-01 | 4.36E-01 |
| LOC254559 | 0.0900  | 8.35E-02 | 1.61E-01 |
| LOC255025 | 0.1752  | 7.00E-04 | 3.17E-03 |
| LOC255167 | -0.2523 | 8.52E-07 | 9.83E-06 |
| LOC256880 | 0.3289  | 8.32E-11 | 2.48E-09 |
| LOC257358 | 0.0362  | 4.87E-01 | 6.14E-01 |
| LOC25845  | 0.1608  | 1.89E-03 | 7.33E-03 |
| LOC26102  | 0.0228  | 6.62E-01 | 7.63E-01 |

|           |         |          |          |
|-----------|---------|----------|----------|
| LOC282997 | -0.2408 | 2.72E-06 | 2.72E-05 |
| LOC283050 | 0.2192  | 2.04E-05 | 1.57E-04 |
| LOC283070 | -0.0916 | 7.82E-02 | 1.53E-01 |
| LOC283174 | -0.0389 | 4.55E-01 | 5.86E-01 |
| LOC283267 | 0.2208  | 1.78E-05 | 1.39E-04 |
| LOC283314 | -0.0091 | 8.62E-01 | 9.11E-01 |
| LOC283332 | 0.1236  | 1.72E-02 | 4.54E-02 |
| LOC283392 | -0.0107 | 8.37E-01 | 8.93E-01 |
| LOC283404 | 0.0622  | 2.32E-01 | 3.55E-01 |
| LOC283663 | 0.0965  | 6.34E-02 | 1.30E-01 |
| LOC283731 | -0.0808 | 1.20E-01 | 2.15E-01 |
| LOC283761 | 0.0155  | 7.67E-01 | 8.43E-01 |
| LOC283856 | -0.3178 | 3.78E-10 | 9.94E-09 |
| LOC283867 | -0.0062 | 9.06E-01 | 9.41E-01 |
| LOC283914 | 0.0337  | 5.18E-01 | 6.42E-01 |
| LOC283922 | 0.0081  | 8.76E-01 | 9.20E-01 |
| LOC283999 | 0.0406  | 4.35E-01 | 5.67E-01 |
| LOC284009 | 0.1797  | 5.05E-04 | 2.40E-03 |
| LOC284023 | 0.2145  | 3.10E-05 | 2.25E-04 |
| LOC284100 | 0.2284  | 8.85E-06 | 7.54E-05 |
| LOC284232 | 0.0031  | 9.53E-01 | 9.71E-01 |
| LOC284233 | 0.1036  | 4.62E-02 | 1.01E-01 |
| LOC284276 | 0.0581  | 2.64E-01 | 3.91E-01 |
| LOC284379 | 0.0383  | 4.62E-01 | 5.92E-01 |
| LOC284440 | -0.0172 | 7.42E-01 | 8.26E-01 |
| LOC284441 | -0.0669 | 1.98E-01 | 3.15E-01 |
| LOC284551 | 0.1096  | 3.48E-02 | 8.08E-02 |
| LOC284578 | 0.0696  | 1.81E-01 | 2.93E-01 |
| LOC284632 | 0.0788  | 1.30E-01 | 2.27E-01 |
| LOC284661 | 0.0592  | 2.55E-01 | 3.81E-01 |
| LOC284688 | 0.1197  | 2.11E-02 | 5.37E-02 |
| LOC284749 | 0.2955  | 6.51E-09 | 1.26E-07 |
| LOC284788 | -0.0420 | 4.20E-01 | 5.53E-01 |
| LOC284798 | 0.1030  | 4.74E-02 | 1.03E-01 |
| LOC284837 | 0.1724  | 8.53E-04 | 3.75E-03 |
| LOC284900 | 0.1985  | 1.19E-04 | 7.06E-04 |
| LOC285033 | -0.0805 | 1.22E-01 | 2.17E-01 |
| LOC285045 | 0.0205  | 6.93E-01 | 7.89E-01 |
| LOC285074 | -0.0586 | 2.60E-01 | 3.86E-01 |
| LOC285205 | 0.1167  | 2.45E-02 | 6.06E-02 |
| LOC285359 | 0.3021  | 2.87E-09 | 6.10E-08 |
| LOC285370 | 0.0815  | 1.17E-01 | 2.10E-01 |
| LOC285375 | 0.1504  | 3.69E-03 | 1.28E-02 |
| LOC285401 | 0.0802  | 1.23E-01 | 2.18E-01 |

|           |         |          |          |
|-----------|---------|----------|----------|
| LOC285419 | 0.1336  | 1.00E-02 | 2.92E-02 |
| LOC285456 | -0.1883 | 2.64E-04 | 1.39E-03 |
| LOC285501 | 0.1019  | 4.98E-02 | 1.07E-01 |
| LOC285548 | 0.1293  | 1.27E-02 | 3.55E-02 |
| LOC285593 | -0.2451 | 1.77E-06 | 1.88E-05 |
| LOC285627 | 0.0154  | 7.67E-01 | 8.43E-01 |
| LOC285629 | 0.2847  | 2.39E-08 | 4.03E-07 |
| LOC285692 | 0.1236  | 1.73E-02 | 4.56E-02 |
| LOC285696 | -0.1025 | 4.85E-02 | 1.05E-01 |
| LOC285733 | 0.0129  | 8.05E-01 | 8.71E-01 |
| LOC285735 | 0.0572  | 2.72E-01 | 4.00E-01 |
| LOC285740 | 0.0689  | 1.85E-01 | 2.98E-01 |
| LOC285768 | 0.1919  | 2.01E-04 | 1.11E-03 |
| LOC285780 | -0.1574 | 2.37E-03 | 8.86E-03 |
| LOC285796 | -0.0223 | 6.68E-01 | 7.68E-01 |
| LOC285830 | 0.2073  | 5.74E-05 | 3.81E-04 |
| LOC285847 | -0.0965 | 6.34E-02 | 1.30E-01 |
| LOC285954 | 0.0228  | 6.61E-01 | 7.63E-01 |
| LOC286002 | -0.0061 | 9.07E-01 | 9.41E-01 |
| LOC286094 | 0.0428  | 4.11E-01 | 5.44E-01 |
| LOC286135 | 0.0072  | 8.90E-01 | 9.30E-01 |
| LOC286238 | -0.0019 | 9.71E-01 | 9.81E-01 |
| LOC286359 | 0.1506  | 3.65E-03 | 1.27E-02 |
| LOC286367 | 0.2000  | 1.05E-04 | 6.36E-04 |
| LOC286467 | 0.0484  | 3.52E-01 | 4.84E-01 |
| LOC29034  | -0.1219 | 1.88E-02 | 4.89E-02 |
| LOC338588 | -0.0024 | 9.63E-01 | 9.77E-01 |
| LOC338651 | 0.0418  | 4.22E-01 | 5.55E-01 |
| LOC338758 | -0.0797 | 1.26E-01 | 2.21E-01 |
| LOC338799 | 0.2161  | 2.68E-05 | 1.99E-04 |
| LOC339047 | 0.3317  | 5.60E-11 | 1.74E-09 |
| LOC339240 | 0.0010  | 9.85E-01 | 9.91E-01 |
| LOC339290 | -0.0300 | 5.64E-01 | 6.82E-01 |
| LOC339524 | -0.2063 | 6.25E-05 | 4.09E-04 |
| LOC339535 | 0.1839  | 3.69E-04 | 1.85E-03 |
| LOC339674 | 0.3601  | 8.45E-13 | 3.84E-11 |
| LOC339788 | 0.1100  | 3.42E-02 | 7.96E-02 |
| LOC340017 | 0.0865  | 9.60E-02 | 1.80E-01 |
| LOC340074 | 0.0118  | 8.21E-01 | 8.83E-01 |
| LOC340094 | 0.0016  | 9.75E-01 | 9.84E-01 |
| LOC340357 | 0.0345  | 5.08E-01 | 6.32E-01 |
| LOC340508 | 0.0902  | 8.27E-02 | 1.60E-01 |
| LOC341056 | 0.0778  | 1.35E-01 | 2.34E-01 |
| LOC342346 | -0.0878 | 9.11E-02 | 1.73E-01 |

|           |         |          |          |
|-----------|---------|----------|----------|
| LOC344595 | -0.0114 | 8.26E-01 | 8.86E-01 |
| LOC344967 | 0.1934  | 1.78E-04 | 9.99E-04 |
| LOC347376 | 0.1116  | 3.16E-02 | 7.44E-02 |
| LOC348021 | 0.0621  | 2.33E-01 | 3.56E-01 |
| LOC348840 | -0.0526 | 3.12E-01 | 4.42E-01 |
| LOC348926 | 0.0775  | 1.36E-01 | 2.36E-01 |
| LOC349114 | 0.1547  | 2.81E-03 | 1.03E-02 |
| LOC349196 | 0.0844  | 1.05E-01 | 1.92E-01 |
| LOC360030 | 0.0938  | 7.12E-02 | 1.42E-01 |
| LOC374443 | 0.1419  | 6.18E-03 | 1.96E-02 |
| LOC374491 | 0.0605  | 2.45E-01 | 3.70E-01 |
| LOC375190 | 0.1603  | 1.95E-03 | 7.55E-03 |
| LOC387646 | 0.2656  | 2.08E-07 | 2.80E-06 |
| LOC387647 | 0.0268  | 6.07E-01 | 7.20E-01 |
| LOC388152 | 0.2553  | 6.26E-07 | 7.44E-06 |
| LOC388242 | 0.0497  | 3.40E-01 | 4.72E-01 |
| LOC388387 | 0.0028  | 9.58E-01 | 9.74E-01 |
| LOC388428 | 0.0955  | 6.61E-02 | 1.34E-01 |
| LOC388588 | -0.1028 | 4.78E-02 | 1.04E-01 |
| LOC388692 | 0.1270  | 1.44E-02 | 3.94E-02 |
| LOC388789 | 0.0379  | 4.67E-01 | 5.97E-01 |
| LOC388796 | 0.1563  | 2.54E-03 | 9.38E-03 |
| LOC388946 | 0.0392  | 4.52E-01 | 5.83E-01 |
| LOC388955 | -0.0543 | 2.97E-01 | 4.27E-01 |
| LOC389033 | -0.0902 | 8.28E-02 | 1.60E-01 |
| LOC389332 | 0.2201  | 1.90E-05 | 1.47E-04 |
| LOC389333 | 0.0312  | 5.49E-01 | 6.69E-01 |
| LOC389458 | -0.0099 | 8.49E-01 | 9.02E-01 |
| LOC389493 | 0.1067  | 3.99E-02 | 9.00E-02 |
| LOC389634 | 0.1170  | 2.42E-02 | 6.00E-02 |
| LOC389705 | 0.0357  | 4.94E-01 | 6.20E-01 |
| LOC389791 | 0.2350  | 4.77E-06 | 4.46E-05 |
| LOC390595 | 0.0495  | 3.41E-01 | 4.73E-01 |
| LOC390858 | -0.0347 | 5.05E-01 | 6.30E-01 |
| LOC391322 | -0.0320 | 5.39E-01 | 6.60E-01 |
| LOC392196 | 0.0547  | 2.93E-01 | 4.22E-01 |
| LOC399744 | 0.0662  | 2.03E-01 | 3.20E-01 |
| LOC399815 | 0.2581  | 4.67E-07 | 5.77E-06 |
| LOC399959 | -0.3573 | 1.30E-12 | 5.65E-11 |
| LOC400027 | -0.0128 | 8.06E-01 | 8.72E-01 |
| LOC400043 | 0.0713  | 1.71E-01 | 2.80E-01 |
| LOC400657 | 0.2116  | 3.98E-05 | 2.79E-04 |
| LOC400696 | 0.1250  | 1.60E-02 | 4.28E-02 |
| LOC400752 | 0.0093  | 8.58E-01 | 9.08E-01 |



|           |         |          |          |
|-----------|---------|----------|----------|
| LOC400759 | -0.0033 | 9.49E-01 | 9.68E-01 |
| LOC400794 | 0.1152  | 2.65E-02 | 6.46E-02 |
| LOC400804 | 0.0597  | 2.52E-01 | 3.77E-01 |
| LOC400891 | 0.0994  | 5.59E-02 | 1.17E-01 |
| LOC400927 | 0.1342  | 9.66E-03 | 2.85E-02 |
| LOC400931 | 0.0761  | 1.44E-01 | 2.45E-01 |
| LOC400940 | 0.0997  | 5.51E-02 | 1.16E-01 |
| LOC401010 | 0.0332  | 5.23E-01 | 6.47E-01 |
| LOC401052 | 0.1652  | 1.40E-03 | 5.72E-03 |
| LOC401093 | -0.1230 | 1.78E-02 | 4.67E-02 |
| LOC401127 | -0.1399 | 6.96E-03 | 2.17E-02 |
| LOC401387 | -0.0712 | 1.71E-01 | 2.80E-01 |
| LOC401397 | 0.0078  | 8.81E-01 | 9.24E-01 |
| LOC401431 | -0.0842 | 1.06E-01 | 1.94E-01 |
| LOC401463 | -0.0706 | 1.75E-01 | 2.85E-01 |
| LOC401588 | 0.1662  | 1.31E-03 | 5.40E-03 |
| LOC402377 | 0.1220  | 1.88E-02 | 4.88E-02 |
| LOC402644 | 0.0439  | 4.00E-01 | 5.32E-01 |
| LOC407835 | 0.0578  | 2.67E-01 | 3.94E-01 |
| LOC415056 | 0.0210  | 6.86E-01 | 7.83E-01 |
| LOC440040 | 0.0574  | 2.70E-01 | 3.97E-01 |
| LOC440173 | 0.1466  | 4.67E-03 | 1.56E-02 |
| LOC440354 | 0.0700  | 1.78E-01 | 2.89E-01 |
| LOC440356 | 0.2776  | 5.43E-08 | 8.38E-07 |
| LOC440461 | 0.0339  | 5.14E-01 | 6.39E-01 |
| LOC440563 | 0.1509  | 3.57E-03 | 1.25E-02 |
| LOC440896 | 0.1195  | 2.13E-02 | 5.40E-02 |
| LOC440905 | 0.1352  | 9.14E-03 | 2.72E-02 |
| LOC440925 | -0.0308 | 5.55E-01 | 6.74E-01 |
| LOC440944 | 0.3458  | 7.41E-12 | 2.75E-10 |
| LOC440957 | 0.0272  | 6.02E-01 | 7.14E-01 |
| LOC441046 | -0.1485 | 4.15E-03 | 1.42E-02 |
| LOC441089 | 0.1439  | 5.48E-03 | 1.78E-02 |
| LOC441177 | -0.1112 | 3.22E-02 | 7.57E-02 |
| LOC441204 | 0.0105  | 8.40E-01 | 8.94E-01 |
| LOC441208 | -0.1481 | 4.26E-03 | 1.45E-02 |
| LOC441294 | 0.1684  | 1.13E-03 | 4.77E-03 |
| LOC441454 | 0.0952  | 6.70E-02 | 1.36E-01 |
| LOC441455 | 0.1148  | 2.70E-02 | 6.56E-02 |
| LOC441601 | 0.1374  | 8.06E-03 | 2.45E-02 |
| LOC441666 | 0.1669  | 1.26E-03 | 5.22E-03 |
| LOC441869 | 0.1499  | 3.81E-03 | 1.32E-02 |
| LOC442308 | 0.0887  | 8.81E-02 | 1.68E-01 |
| LOC442421 | -0.1395 | 7.12E-03 | 2.21E-02 |

|           |         |          |          |
|-----------|---------|----------|----------|
| LOC442454 | -0.0235 | 6.52E-01 | 7.55E-01 |
| LOC442459 | 0.2148  | 3.02E-05 | 2.20E-04 |
| LOC493754 | 0.2540  | 7.11E-07 | 8.37E-06 |
| LOC494141 | 0.0739  | 1.56E-01 | 2.61E-01 |
| LOC541471 | 0.1927  | 1.88E-04 | 1.05E-03 |
| LOC541473 | 0.0179  | 7.32E-01 | 8.18E-01 |
| LOC550112 | -0.0153 | 7.70E-01 | 8.45E-01 |
| LOC550643 | -0.0128 | 8.06E-01 | 8.72E-01 |
| LOC554202 | 0.1612  | 1.84E-03 | 7.17E-03 |
| LOC55908  | 0.0149  | 7.74E-01 | 8.49E-01 |
| LOC572558 | -0.1320 | 1.09E-02 | 3.13E-02 |
| LOC595101 | 0.0899  | 8.37E-02 | 1.61E-01 |
| LOC606724 | 0.0608  | 2.42E-01 | 3.67E-01 |
| LOC613037 | 0.2079  | 5.46E-05 | 3.65E-04 |
| LOC619207 | 0.0129  | 8.04E-01 | 8.71E-01 |
| LOC641298 | 0.0479  | 3.57E-01 | 4.89E-01 |
| LOC641367 | 0.1267  | 1.46E-02 | 3.98E-02 |
| LOC642587 | -0.1254 | 1.56E-02 | 4.20E-02 |
| LOC642597 | -0.2501 | 1.07E-06 | 1.20E-05 |
| LOC642826 | 0.1999  | 1.06E-04 | 6.38E-04 |
| LOC642846 | 0.3979  | 1.58E-15 | 1.21E-13 |
| LOC642852 | 0.3206  | 2.58E-10 | 7.03E-09 |
| LOC642929 | 0.0237  | 6.50E-01 | 7.53E-01 |
| LOC643008 | 0.1082  | 3.72E-02 | 8.51E-02 |
| LOC643387 | 0.2287  | 8.57E-06 | 7.33E-05 |
| LOC643486 | 0.0233  | 6.55E-01 | 7.57E-01 |
| LOC643677 | 0.1406  | 6.69E-03 | 2.10E-02 |
| LOC643719 | -0.0465 | 3.72E-01 | 5.05E-01 |
| LOC643763 | 0.1215  | 1.93E-02 | 4.98E-02 |
| LOC643837 | -0.2244 | 1.28E-05 | 1.04E-04 |
| LOC643923 | -0.0274 | 5.99E-01 | 7.12E-01 |
| LOC643955 | 0.0004  | 9.94E-01 | 9.96E-01 |
| LOC644145 | -0.0235 | 6.51E-01 | 7.55E-01 |
| LOC644165 | 0.2317  | 6.53E-06 | 5.83E-05 |
| LOC644172 | -0.1211 | 1.96E-02 | 5.06E-02 |
| LOC644538 | 0.0231  | 6.57E-01 | 7.59E-01 |
| LOC644669 | 0.0619  | 2.34E-01 | 3.57E-01 |
| LOC644936 | -0.1016 | 5.06E-02 | 1.09E-01 |
| LOC645166 | 0.1931  | 1.82E-04 | 1.02E-03 |
| LOC645323 | 0.0797  | 1.25E-01 | 2.21E-01 |
| LOC645332 | -0.0204 | 6.95E-01 | 7.89E-01 |
| LOC645431 | 0.0486  | 3.50E-01 | 4.83E-01 |
| LOC645676 | 0.3245  | 1.53E-10 | 4.34E-09 |
| LOC645752 | -0.0888 | 8.78E-02 | 1.67E-01 |

|           |         |          |          |
|-----------|---------|----------|----------|
| LOC646214 | 0.1336  | 1.00E-02 | 2.92E-02 |
| LOC646471 | 0.0077  | 8.83E-01 | 9.25E-01 |
| LOC646498 | 0.0447  | 3.91E-01 | 5.24E-01 |
| LOC646627 | 0.1297  | 1.24E-02 | 3.48E-02 |
| LOC646762 | 0.1602  | 1.96E-03 | 7.57E-03 |
| LOC646813 | -0.0159 | 7.61E-01 | 8.39E-01 |
| LOC646851 | 0.2973  | 5.22E-09 | 1.04E-07 |
| LOC646982 | 0.0735  | 1.58E-01 | 2.64E-01 |
| LOC646999 | -0.0722 | 1.65E-01 | 2.73E-01 |
| LOC647121 | 0.0173  | 7.39E-01 | 8.24E-01 |
| LOC647288 | -0.0964 | 6.36E-02 | 1.30E-01 |
| LOC647309 | -0.1727 | 8.39E-04 | 3.69E-03 |
| LOC647859 | -0.0364 | 4.85E-01 | 6.13E-01 |
| LOC647946 | 0.2389  | 3.26E-06 | 3.19E-05 |
| LOC647979 | 0.0244  | 6.39E-01 | 7.45E-01 |
| LOC648691 | 0.1789  | 5.34E-04 | 2.52E-03 |
| LOC648740 | -0.0008 | 9.88E-01 | 9.92E-01 |
| LOC649330 | 0.1603  | 1.95E-03 | 7.53E-03 |
| LOC650368 | 0.0627  | 2.28E-01 | 3.51E-01 |
| LOC650623 | -0.0049 | 9.25E-01 | 9.52E-01 |
| LOC651250 | 0.2111  | 4.16E-05 | 2.89E-04 |
| LOC652276 | 0.1242  | 1.67E-02 | 4.43E-02 |
| LOC653113 | 0.0851  | 1.02E-01 | 1.88E-01 |
| LOC653501 | 0.0896  | 8.47E-02 | 1.63E-01 |
| LOC653544 | -0.1151 | 2.66E-02 | 6.49E-02 |
| LOC653566 | 0.1213  | 1.95E-02 | 5.02E-02 |
| LOC653653 | -0.0699 | 1.79E-01 | 2.91E-01 |
| LOC653786 | -0.0867 | 9.55E-02 | 1.80E-01 |
| LOC654342 | 0.1092  | 3.54E-02 | 8.18E-02 |
| LOC654433 | 0.0115  | 8.25E-01 | 8.86E-01 |
| LOC678655 | -0.0156 | 7.64E-01 | 8.41E-01 |
| LOC723809 | 0.2962  | 5.98E-09 | 1.17E-07 |
| LOC723972 | 0.0828  | 1.11E-01 | 2.02E-01 |
| LOC727677 | -0.0855 | 1.00E-01 | 1.86E-01 |
| LOC727896 | 0.2007  | 9.90E-05 | 6.04E-04 |
| LOC727924 | -0.0138 | 7.92E-01 | 8.62E-01 |
| LOC728024 | 0.0380  | 4.65E-01 | 5.95E-01 |
| LOC728190 | 0.1028  | 4.79E-02 | 1.04E-01 |
| LOC728264 | 0.0421  | 4.19E-01 | 5.52E-01 |
| LOC728276 | -0.0617 | 2.36E-01 | 3.59E-01 |
| LOC728323 | -0.0153 | 7.68E-01 | 8.44E-01 |
| LOC728392 | -0.0027 | 9.59E-01 | 9.74E-01 |
| LOC728554 | 0.1276  | 1.39E-02 | 3.84E-02 |
| LOC728606 | -0.0175 | 7.36E-01 | 8.22E-01 |

|              |         |          |          |
|--------------|---------|----------|----------|
| LOC728613    | 0.0646  | 2.14E-01 | 3.34E-01 |
| LOC728640    | -0.0882 | 8.98E-02 | 1.71E-01 |
| LOC728643    | 0.1927  | 1.88E-04 | 1.05E-03 |
| LOC728723    | -0.0427 | 4.13E-01 | 5.45E-01 |
| LOC728743    | 0.0026  | 9.61E-01 | 9.75E-01 |
| LOC728758    | 0.1806  | 4.72E-04 | 2.26E-03 |
| LOC728819    | 0.1013  | 5.11E-02 | 1.09E-01 |
| LOC728855    | 0.0991  | 5.65E-02 | 1.18E-01 |
| LOC728875    | 0.0597  | 2.52E-01 | 3.77E-01 |
| LOC728989    | 0.0010  | 9.84E-01 | 9.90E-01 |
| LOC729020    | -0.0273 | 6.00E-01 | 7.13E-01 |
| LOC729082    | 0.0254  | 6.26E-01 | 7.34E-01 |
| LOC729121    | 0.0573  | 2.71E-01 | 3.99E-01 |
| LOC729156    | -0.0419 | 4.21E-01 | 5.54E-01 |
| LOC729176    | 0.0264  | 6.12E-01 | 7.23E-01 |
| LOC729234    | 0.1241  | 1.68E-02 | 4.46E-02 |
| LOC729375    | 0.0950  | 6.77E-02 | 1.37E-01 |
| LOC729467    | 0.0434  | 4.05E-01 | 5.38E-01 |
| LOC729603    | 0.0744  | 1.52E-01 | 2.57E-01 |
| LOC729609    | 0.0179  | 7.31E-01 | 8.17E-01 |
| LOC729668    | 0.0594  | 2.54E-01 | 3.80E-01 |
| LOC729678    | -0.0282 | 5.88E-01 | 7.03E-01 |
| LOC729799    | 0.0091  | 8.62E-01 | 9.11E-01 |
| LOC729991-ME | -0.0199 | 7.03E-01 | 7.96E-01 |
| LOC729991    | 0.0907  | 8.10E-02 | 1.57E-01 |
| LOC730101    | 0.2160  | 2.73E-05 | 2.02E-04 |
| LOC730668    | 0.1317  | 1.11E-02 | 3.18E-02 |
| LOC731779    | 0.0942  | 7.01E-02 | 1.41E-01 |
| LOC731789    | 0.0933  | 7.25E-02 | 1.44E-01 |
| LOC732275    | 0.0975  | 6.06E-02 | 1.25E-01 |
| LOC80054     | 0.1990  | 1.14E-04 | 6.81E-04 |
| LOC80154     | 0.2787  | 4.79E-08 | 7.51E-07 |
| LOC81691     | 0.3349  | 3.55E-11 | 1.16E-09 |
| LOC84740     | 0.2263  | 1.07E-05 | 8.96E-05 |
| LOC84856     | 0.0817  | 1.16E-01 | 2.09E-01 |
| LOC84931     | 0.1041  | 4.52E-02 | 9.92E-02 |
| LOC84989     | 0.0863  | 9.71E-02 | 1.82E-01 |
| LOC90110     | 0.0750  | 1.50E-01 | 2.53E-01 |
| LOC90246     | -0.0176 | 7.36E-01 | 8.21E-01 |
| LOC90586     | -0.0803 | 1.22E-01 | 2.18E-01 |
| LOC90784     | 0.0728  | 1.62E-01 | 2.69E-01 |
| LOC90834     | 0.1378  | 7.87E-03 | 2.40E-02 |
| LOC91149     | 0.1937  | 1.74E-04 | 9.77E-04 |
| LOC91316     | 0.3440  | 9.64E-12 | 3.45E-10 |

|          |         |          |          |
|----------|---------|----------|----------|
| LOC91450 | 0.0920  | 7.68E-02 | 1.51E-01 |
| LOC91948 | -0.0492 | 3.45E-01 | 4.77E-01 |
| LOC92249 | 0.0793  | 1.27E-01 | 2.24E-01 |
| LOC92659 | 0.2678  | 1.64E-07 | 2.28E-06 |
| LOC92973 | 0.1357  | 8.86E-03 | 2.65E-02 |
| LOC93432 | 0.1421  | 6.10E-03 | 1.94E-02 |
| LOC93622 | 0.1512  | 3.50E-03 | 1.23E-02 |
| LOC96610 | -0.0038 | 9.41E-01 | 9.64E-01 |
| LOH12CR1 | -0.0172 | 7.41E-01 | 8.25E-01 |
| LOH12CR2 | -0.0567 | 2.76E-01 | 4.04E-01 |
| LOH3CR2A | 0.0759  | 1.45E-01 | 2.47E-01 |
| LONP1    | -0.2073 | 5.75E-05 | 3.81E-04 |
| LONP2    | -0.3553 | 1.75E-12 | 7.43E-11 |
| LONRF1   | -0.0380 | 4.65E-01 | 5.95E-01 |
| LONRF2   | 0.1536  | 3.02E-03 | 1.09E-02 |
| LONRF3   | -0.0554 | 2.88E-01 | 4.16E-01 |
| LOR      | 0.0323  | 5.35E-01 | 6.57E-01 |
| LOXHD1   | -0.0967 | 6.28E-02 | 1.29E-01 |
| LOXL1    | -0.0490 | 3.47E-01 | 4.79E-01 |
| LOXL2    | -0.0021 | 9.68E-01 | 9.80E-01 |
| LOXL3    | 0.0204  | 6.95E-01 | 7.89E-01 |
| LOXL4    | -0.0154 | 7.68E-01 | 8.44E-01 |
| LOX      | -0.0169 | 7.45E-01 | 8.28E-01 |
| LPAL2    | 0.0555  | 2.87E-01 | 4.16E-01 |
| LPAR1    | 0.0087  | 8.67E-01 | 9.14E-01 |
| LPAR2    | 0.3067  | 1.61E-09 | 3.65E-08 |
| LPAR3    | -0.0518 | 3.20E-01 | 4.50E-01 |
| LPAR4    | -0.0559 | 2.82E-01 | 4.11E-01 |
| LPAR5    | -0.0140 | 7.88E-01 | 8.59E-01 |
| LPAR6    | -0.0318 | 5.42E-01 | 6.63E-01 |
| LPA      | -0.0672 | 1.96E-01 | 3.12E-01 |
| LPCAT1   | 0.1483  | 4.20E-03 | 1.43E-02 |
| LPCAT2   | -0.0281 | 5.90E-01 | 7.04E-01 |
| LPCAT3   | 0.0113  | 8.28E-01 | 8.87E-01 |
| LPCAT4   | 0.1256  | 1.55E-02 | 4.17E-02 |
| LPGAT1   | 0.1407  | 6.64E-03 | 2.09E-02 |
| LPHN1    | 0.0165  | 7.51E-01 | 8.32E-01 |
| LPHN2    | -0.0415 | 4.25E-01 | 5.58E-01 |
| LPHN3    | -0.0901 | 8.29E-02 | 1.60E-01 |
| LPIN1    | -0.1592 | 2.10E-03 | 8.02E-03 |
| LPIN2    | -0.1369 | 8.28E-03 | 2.50E-02 |
| LPIN3    | 0.1303  | 1.20E-02 | 3.39E-02 |
| LPL      | -0.1258 | 1.53E-02 | 4.14E-02 |
| LPO      | 0.1705  | 9.78E-04 | 4.22E-03 |

|        |         |          |          |
|--------|---------|----------|----------|
| LPPR1  | -0.0245 | 6.38E-01 | 7.44E-01 |
| LPPR2  | -0.0911 | 7.96E-02 | 1.55E-01 |
| LPPR3  | 0.0713  | 1.71E-01 | 2.80E-01 |
| LPPR4  | 0.0052  | 9.20E-01 | 9.49E-01 |
| LPPR5  | 0.0798  | 1.25E-01 | 2.21E-01 |
| LPP    | -0.0503 | 3.34E-01 | 4.64E-01 |
| LPXN   | -0.1343 | 9.59E-03 | 2.83E-02 |
| LQK1   | -0.0206 | 6.93E-01 | 7.88E-01 |
| LRAT   | -0.0630 | 2.26E-01 | 3.48E-01 |
| LRBA   | -0.1851 | 3.38E-04 | 1.73E-03 |
| LRCH1  | -0.1401 | 6.88E-03 | 2.14E-02 |
| LRCH2  | -0.1543 | 2.88E-03 | 1.04E-02 |
| LRCH3  | 0.1008  | 5.24E-02 | 1.11E-01 |
| LRCH4  | -0.0258 | 6.21E-01 | 7.30E-01 |
| LRDD   | 0.3161  | 4.74E-10 | 1.21E-08 |
| LRFN1  | 0.1198  | 2.10E-02 | 5.35E-02 |
| LRFN2  | 0.1467  | 4.62E-03 | 1.54E-02 |
| LRFN3  | -0.0562 | 2.80E-01 | 4.09E-01 |
| LRFN4  | 0.0348  | 5.05E-01 | 6.30E-01 |
| LRFN5  | 0.0826  | 1.12E-01 | 2.03E-01 |
| LRG1   | -0.1701 | 1.01E-03 | 4.32E-03 |
| LRGUK  | 0.0569  | 2.74E-01 | 4.02E-01 |
| LRIG1  | -0.1320 | 1.09E-02 | 3.14E-02 |
| LRIG2  | 0.1087  | 3.63E-02 | 8.35E-02 |
| LRIG3  | 0.1888  | 2.55E-04 | 1.36E-03 |
| LRIT1  | 0.0438  | 4.01E-01 | 5.33E-01 |
| LRIT2  | -0.0419 | 4.21E-01 | 5.54E-01 |
| LRIT3  | 0.0298  | 5.68E-01 | 6.85E-01 |
| LRMP   | -0.0713 | 1.70E-01 | 2.79E-01 |
| LRP10  | -0.0647 | 2.14E-01 | 3.33E-01 |
| LRP11  | 0.3338  | 4.18E-11 | 1.33E-09 |
| LRP12  | 0.1106  | 3.32E-02 | 7.76E-02 |
| LRP1B  | -0.0272 | 6.01E-01 | 7.14E-01 |
| LRP1   | -0.3033 | 2.48E-09 | 5.33E-08 |
| LRP2BP | -0.1047 | 4.38E-02 | 9.70E-02 |
| LRP2   | 0.0001  | 9.99E-01 | 9.99E-01 |
| LRP3   | 0.0311  | 5.50E-01 | 6.70E-01 |
| LRP4   | -0.0144 | 7.83E-01 | 8.55E-01 |
| LRP5L  | 0.0830  | 1.10E-01 | 2.01E-01 |
| LRP5   | -0.2125 | 3.67E-05 | 2.61E-04 |
| LRP6   | -0.0416 | 4.25E-01 | 5.57E-01 |
| LRP8   | 0.2339  | 5.26E-06 | 4.84E-05 |
| LRPAP1 | -0.1294 | 1.26E-02 | 3.54E-02 |
| LRPPRC | 0.1209  | 1.99E-02 | 5.11E-02 |

|          |         |          |          |
|----------|---------|----------|----------|
| LRRC10B  | -0.1127 | 2.99E-02 | 7.13E-02 |
| LRRC10   | -0.0723 | 1.65E-01 | 2.72E-01 |
| LRRC14B  | 0.1349  | 9.31E-03 | 2.76E-02 |
| LRRC14   | 0.2421  | 2.37E-06 | 2.42E-05 |
| LRRC15   | -0.0993 | 5.60E-02 | 1.18E-01 |
| LRRC16A  | 0.0451  | 3.86E-01 | 5.19E-01 |
| LRRC16B  | 0.1039  | 4.55E-02 | 9.98E-02 |
| LRRC17   | -0.0542 | 2.98E-01 | 4.28E-01 |
| LRRC18   | 0.1091  | 3.56E-02 | 8.21E-02 |
| LRRC19   | -0.0494 | 3.42E-01 | 4.74E-01 |
| LRRC1    | 0.1909  | 2.18E-04 | 1.18E-03 |
| LRRC20   | -0.0119 | 8.20E-01 | 8.82E-01 |
| LRRC23   | 0.0506  | 3.32E-01 | 4.63E-01 |
| LRRC24   | -0.0103 | 8.43E-01 | 8.97E-01 |
| LRRC25   | -0.0727 | 1.63E-01 | 2.70E-01 |
| LRRC26   | 0.1763  | 6.46E-04 | 2.96E-03 |
| LRRC27   | 0.0206  | 6.92E-01 | 7.87E-01 |
| LRRC28   | -0.0739 | 1.56E-01 | 2.61E-01 |
| LRRC29   | -0.3622 | 6.09E-13 | 2.83E-11 |
| LRRC2    | -0.1020 | 4.96E-02 | 1.07E-01 |
| LRRC30   | -0.0245 | 6.38E-01 | 7.44E-01 |
| LRRC31   | -0.0120 | 8.18E-01 | 8.80E-01 |
| LRRC32   | -0.1826 | 4.08E-04 | 2.01E-03 |
| LRRC33   | -0.1500 | 3.79E-03 | 1.32E-02 |
| LRRC34   | -0.0016 | 9.76E-01 | 9.85E-01 |
| LRRC36   | 0.1665  | 1.28E-03 | 5.31E-03 |
| LRRC37A2 | 0.0655  | 2.08E-01 | 3.26E-01 |
| LRRC37A3 | 0.1069  | 3.96E-02 | 8.95E-02 |
| LRRC37A4 | 0.0591  | 2.56E-01 | 3.82E-01 |
| LRRC37A  | 0.1498  | 3.83E-03 | 1.33E-02 |
| LRRC37B2 | 0.3391  | 1.96E-11 | 6.67E-10 |
| LRRC37B  | 0.3262  | 1.21E-10 | 3.49E-09 |
| LRRC39   | 0.0575  | 2.69E-01 | 3.97E-01 |
| LRRC3B   | 0.0207  | 6.91E-01 | 7.86E-01 |
| LRRC3    | -0.2056 | 6.63E-05 | 4.29E-04 |
| LRRC40   | 0.0014  | 9.79E-01 | 9.87E-01 |
| LRRC41   | 0.1227  | 1.81E-02 | 4.74E-02 |
| LRRC42   | 0.2451  | 1.77E-06 | 1.88E-05 |
| LRRC43   | 0.0113  | 8.29E-01 | 8.88E-01 |
| LRRC45   | 0.1387  | 7.47E-03 | 2.30E-02 |
| LRRC46   | 0.2531  | 7.85E-07 | 9.13E-06 |
| LRRC47   | -0.0591 | 2.56E-01 | 3.82E-01 |
| LRRC48   | 0.1008  | 5.23E-02 | 1.11E-01 |
| LRRC49   | 0.0601  | 2.48E-01 | 3.73E-01 |

|         |         |          |          |
|---------|---------|----------|----------|
| LRRC4B  | -0.0901 | 8.30E-02 | 1.60E-01 |
| LRRC4C  | -0.1202 | 2.05E-02 | 5.24E-02 |
| LRRC4   | -0.0818 | 1.16E-01 | 2.08E-01 |
| LRRC50  | -0.0345 | 5.07E-01 | 6.32E-01 |
| LRRC52  | -0.0658 | 2.06E-01 | 3.24E-01 |
| LRRC55  | -0.0669 | 1.98E-01 | 3.15E-01 |
| LRRC56  | 0.0907  | 8.10E-02 | 1.57E-01 |
| LRRC57  | 0.1342  | 9.68E-03 | 2.85E-02 |
| LRRC58  | 0.0443  | 3.95E-01 | 5.27E-01 |
| LRRC59  | 0.2037  | 7.79E-05 | 4.93E-04 |
| LRRC61  | -0.0439 | 4.00E-01 | 5.33E-01 |
| LRRC66  | 0.1395  | 7.14E-03 | 2.21E-02 |
| LRRC67  | -0.0488 | 3.48E-01 | 4.80E-01 |
| LRRC69  | 0.0871  | 9.40E-02 | 1.77E-01 |
| LRRC6   | -0.0585 | 2.61E-01 | 3.87E-01 |
| LRRC70  | -0.1719 | 8.84E-04 | 3.87E-03 |
| LRRC7   | -0.0773 | 1.37E-01 | 2.37E-01 |
| LRRC8A  | -0.0094 | 8.57E-01 | 9.08E-01 |
| LRRC8B  | 0.1560  | 2.58E-03 | 9.51E-03 |
| LRRC8C  | -0.0578 | 2.67E-01 | 3.94E-01 |
| LRRC8D  | -0.0245 | 6.38E-01 | 7.44E-01 |
| LRRC8E  | 0.1663  | 1.30E-03 | 5.37E-03 |
| LRRC1   | 0.1571  | 2.41E-03 | 9.00E-03 |
| LRRFIP1 | -0.2216 | 1.65E-05 | 1.31E-04 |
| LRRFIP2 | 0.0180  | 7.30E-01 | 8.16E-01 |
| LRRIQ1  | 0.1438  | 5.53E-03 | 1.79E-02 |
| LRRIQ3  | -0.0434 | 4.05E-01 | 5.38E-01 |
| LRRIQ4  | 0.1047  | 4.38E-02 | 9.70E-02 |
| LRRK1   | 0.0133  | 7.98E-01 | 8.67E-01 |
| LRRK2   | -0.1458 | 4.90E-03 | 1.62E-02 |
| LRRN1   | 0.0431  | 4.08E-01 | 5.40E-01 |
| LRRN2   | 0.1296  | 1.24E-02 | 3.49E-02 |
| LRRN3   | -0.1090 | 3.59E-02 | 8.27E-02 |
| LRRN4CL | 0.0167  | 7.48E-01 | 8.30E-01 |
| LRRN4   | 0.0949  | 6.78E-02 | 1.37E-01 |
| LRRTM1  | -0.0273 | 6.00E-01 | 7.13E-01 |
| LRRTM2  | -0.1469 | 4.58E-03 | 1.54E-02 |
| LRRTM3  | 0.0165  | 7.51E-01 | 8.33E-01 |
| LRRTM4  | -0.1018 | 5.01E-02 | 1.08E-01 |
| LRSAM1  | -0.0890 | 8.70E-02 | 1.66E-01 |
| LRTM1   | 0.0304  | 5.59E-01 | 6.77E-01 |
| LRTM2   | 0.0841  | 1.06E-01 | 1.94E-01 |
| LRTOMT  | -0.1593 | 2.09E-03 | 8.00E-03 |
| LRWD1   | -0.0994 | 5.59E-02 | 1.17E-01 |



|           |         |          |          |
|-----------|---------|----------|----------|
| LSAMP     | -0.0909 | 8.03E-02 | 1.56E-01 |
| LSG1      | 0.1974  | 1.30E-04 | 7.63E-04 |
| LSM10     | -0.0472 | 3.64E-01 | 4.97E-01 |
| LSM11     | 0.2501  | 1.07E-06 | 1.20E-05 |
| LSM12     | 0.1887  | 2.56E-04 | 1.36E-03 |
| LSM14A    | 0.2181  | 2.25E-05 | 1.71E-04 |
| LSM14B    | 0.2185  | 2.18E-05 | 1.67E-04 |
| LSM1      | 0.0810  | 1.19E-01 | 2.14E-01 |
| LSM2      | 0.2915  | 1.06E-08 | 1.97E-07 |
| LSM3      | 0.0895  | 8.50E-02 | 1.63E-01 |
| LSM4      | 0.0600  | 2.49E-01 | 3.74E-01 |
| LSM5      | 0.0725  | 1.63E-01 | 2.70E-01 |
| LSM6      | 0.0682  | 1.90E-01 | 3.04E-01 |
| LSM7      | 0.1369  | 8.30E-03 | 2.51E-02 |
| LSMD1     | -0.0101 | 8.47E-01 | 9.00E-01 |
| LSP1      | -0.0005 | 9.92E-01 | 9.95E-01 |
| LSR       | 0.0283  | 5.86E-01 | 7.02E-01 |
| LSS       | -0.0547 | 2.94E-01 | 4.23E-01 |
| LST-3TM12 | -0.0927 | 7.44E-02 | 1.47E-01 |
| LST1      | -0.0469 | 3.67E-01 | 5.00E-01 |
| LTA4H     | 0.0472  | 3.64E-01 | 4.97E-01 |
| LTA       | 0.0424  | 4.16E-01 | 5.49E-01 |
| LTB4R2    | -0.0038 | 9.42E-01 | 9.64E-01 |
| LTB4R     | 0.0440  | 3.98E-01 | 5.31E-01 |
| LTBP1     | 0.0091  | 8.62E-01 | 9.11E-01 |
| LTBP2     | -0.1416 | 6.31E-03 | 1.99E-02 |
| LTBP3     | -0.0106 | 8.39E-01 | 8.94E-01 |
| LTBP4     | -0.1009 | 5.21E-02 | 1.11E-01 |
| LTBR      | -0.1203 | 2.04E-02 | 5.22E-02 |
| LTB       | 0.0675  | 1.95E-01 | 3.10E-01 |
| LTC4S     | -0.1150 | 2.67E-02 | 6.50E-02 |
| LTF       | -0.0136 | 7.94E-01 | 8.64E-01 |
| LTK       | -0.0043 | 9.34E-01 | 9.59E-01 |
| LTV1      | 0.1967  | 1.37E-04 | 7.97E-04 |
| LUC7L2    | 0.0097  | 8.52E-01 | 9.04E-01 |
| LUC7L3    | 0.3904  | 5.94E-15 | 4.01E-13 |
| LUC7L     | 0.2948  | 7.14E-09 | 1.37E-07 |
| LUM       | -0.0840 | 1.06E-01 | 1.95E-01 |
| LUZP1     | -0.1049 | 4.34E-02 | 9.63E-02 |
| LUZP2     | -0.1487 | 4.11E-03 | 1.41E-02 |
| LUZP4     | 0.0444  | 3.94E-01 | 5.27E-01 |
| LUZP6     | -0.0519 | 3.19E-01 | 4.49E-01 |
| LXN       | -0.0357 | 4.93E-01 | 6.19E-01 |
| LY6D      | -0.0534 | 3.05E-01 | 4.35E-01 |

|          |         |          |          |
|----------|---------|----------|----------|
| LY6E     | 0.0366  | 4.82E-01 | 6.10E-01 |
| LY6G5B   | 0.3852  | 1.44E-14 | 8.97E-13 |
| LY6G5C   | -0.0703 | 1.76E-01 | 2.87E-01 |
| LY6G6C   | 0.0336  | 5.19E-01 | 6.43E-01 |
| LY6G6D   | -0.0670 | 1.98E-01 | 3.14E-01 |
| LY6G6E   | -0.0762 | 1.43E-01 | 2.45E-01 |
| LY6G6F   | -0.1184 | 2.26E-02 | 5.68E-02 |
| LY6H     | 0.1294  | 1.26E-02 | 3.54E-02 |
| LY6K     | 0.0599  | 2.50E-01 | 3.75E-01 |
| LY75     | -0.0756 | 1.46E-01 | 2.49E-01 |
| LY86     | -0.0701 | 1.78E-01 | 2.89E-01 |
| LY96     | 0.0174  | 7.39E-01 | 8.24E-01 |
| LY9      | -0.0517 | 3.21E-01 | 4.51E-01 |
| LYAR     | 0.1836  | 3.79E-04 | 1.90E-03 |
| LYG1     | 0.1047  | 4.40E-02 | 9.71E-02 |
| LYG2     | 0.1098  | 3.44E-02 | 8.00E-02 |
| LYL1     | -0.0477 | 3.59E-01 | 4.91E-01 |
| LYNX1    | 0.0437  | 4.01E-01 | 5.34E-01 |
| LYN      | -0.0951 | 6.72E-02 | 1.36E-01 |
| LYPD1    | 0.0737  | 1.57E-01 | 2.62E-01 |
| LYPD2    | -0.1278 | 1.37E-02 | 3.80E-02 |
| LYPD3    | 0.1557  | 2.64E-03 | 9.69E-03 |
| LYPD4    | 0.0667  | 2.00E-01 | 3.17E-01 |
| LYPD5    | -0.0071 | 8.91E-01 | 9.30E-01 |
| LYPD6B   | 0.2005  | 1.01E-04 | 6.11E-04 |
| LYPD6    | 0.2143  | 3.15E-05 | 2.28E-04 |
| LYPLA1   | -0.1583 | 2.23E-03 | 8.43E-03 |
| LYPLA2P1 | -0.0527 | 3.12E-01 | 4.41E-01 |
| LYPLA2   | -0.0432 | 4.07E-01 | 5.39E-01 |
| LYPLAL1  | -0.0207 | 6.91E-01 | 7.86E-01 |
| LYRM1    | -0.2780 | 5.17E-08 | 8.02E-07 |
| LYRM2    | 0.2339  | 5.29E-06 | 4.86E-05 |
| LYRM4    | 0.0550  | 2.91E-01 | 4.20E-01 |
| LYRM5    | -0.1945 | 1.63E-04 | 9.23E-04 |
| LYRM7    | -0.1887 | 2.58E-04 | 1.37E-03 |
| LYSMD1   | 0.6094  | 4.39E-39 | 1.09E-35 |
| LYSMD2   | -0.1852 | 3.37E-04 | 1.72E-03 |
| LYSMD3   | -0.1164 | 2.50E-02 | 6.15E-02 |
| LYSMD4   | 0.1240  | 1.68E-02 | 4.46E-02 |
| LYST     | 0.0769  | 1.39E-01 | 2.39E-01 |
| LYVE1    | -0.2362 | 4.24E-06 | 4.03E-05 |
| LYZL1    | 0.0200  | 7.01E-01 | 7.94E-01 |
| LYZL2    | 0.0214  | 6.81E-01 | 7.78E-01 |
| LYZL4    | 0.0795  | 1.26E-01 | 2.22E-01 |

|          |         |          |          |
|----------|---------|----------|----------|
| LYZL6    | -0.0122 | 8.15E-01 | 8.79E-01 |
| LYZ      | 0.0504  | 3.33E-01 | 4.64E-01 |
| LZIC     | 0.0357  | 4.94E-01 | 6.20E-01 |
| LZTFL1   | -0.0730 | 1.61E-01 | 2.67E-01 |
| LZTR1    | 0.1096  | 3.49E-02 | 8.09E-02 |
| LZTS1    | -0.0544 | 2.96E-01 | 4.25E-01 |
| LZTS2    | 0.2174  | 2.40E-05 | 1.81E-04 |
| M6PR     | 0.0733  | 1.59E-01 | 2.64E-01 |
| MAB21L1  | 0.0160  | 7.59E-01 | 8.38E-01 |
| MAB21L2  | 0.0095  | 8.55E-01 | 9.06E-01 |
| MACC1    | 0.0612  | 2.40E-01 | 3.64E-01 |
| MACF1    | -0.0810 | 1.20E-01 | 2.14E-01 |
| MACROD1  | -0.2990 | 4.26E-09 | 8.68E-08 |
| MACROD2  | 0.1127  | 3.00E-02 | 7.14E-02 |
| MAD1L1   | -0.0248 | 6.34E-01 | 7.41E-01 |
| MAD2L1BP | 0.1112  | 3.23E-02 | 7.57E-02 |
| MAD2L1   | 0.3457  | 7.43E-12 | 2.76E-10 |
| MAD2L2   | 0.0210  | 6.87E-01 | 7.83E-01 |
| MADCAM1  | -0.0304 | 5.59E-01 | 6.77E-01 |
| MADD     | 0.1150  | 2.67E-02 | 6.50E-02 |
| MAEA     | 0.0619  | 2.35E-01 | 3.58E-01 |
| MAEL     | 0.1826  | 4.07E-04 | 2.01E-03 |
| MAF1     | 0.0601  | 2.49E-01 | 3.74E-01 |
| MAFA     | 0.0282  | 5.88E-01 | 7.03E-01 |
| MAFB     | -0.1261 | 1.51E-02 | 4.09E-02 |
| MAFF     | -0.0033 | 9.49E-01 | 9.68E-01 |
| MAFG     | 0.2945  | 7.42E-09 | 1.42E-07 |
| MAFK     | -0.0955 | 6.63E-02 | 1.34E-01 |
| MAF      | -0.1690 | 1.08E-03 | 4.60E-03 |
| MAGEA10  | 0.1848  | 3.46E-04 | 1.76E-03 |
| MAGEA11  | 0.1252  | 1.58E-02 | 4.25E-02 |
| MAGEA12  | -0.0218 | 6.75E-01 | 7.74E-01 |
| MAGEA1   | -0.0051 | 9.23E-01 | 9.51E-01 |
| MAGEA2   | -0.0038 | 9.43E-01 | 9.64E-01 |
| MAGEA3   | -0.0068 | 8.96E-01 | 9.34E-01 |
| MAGEA4   | 0.1172  | 2.40E-02 | 5.95E-02 |
| MAGEA5   | 0.2533  | 7.69E-07 | 8.97E-06 |
| MAGEA6   | 0.0000  | 9.99E-01 | 1.00E+00 |
| MAGEA8   | 0.0559  | 2.83E-01 | 4.11E-01 |
| MAGEA9B  | 0.1143  | 2.78E-02 | 6.71E-02 |
| MAGEB10  | -0.0255 | 6.25E-01 | 7.33E-01 |
| MAGEB16  | 0.0236  | 6.51E-01 | 7.55E-01 |
| MAGEB18  | 0.0752  | 1.48E-01 | 2.52E-01 |
| MAGEB1   | 0.0829  | 1.11E-01 | 2.02E-01 |

|         |         |          |          |
|---------|---------|----------|----------|
| MAGEB2  | 0.0222  | 6.69E-01 | 7.69E-01 |
| MAGEB3  | 0.0892  | 8.62E-02 | 1.65E-01 |
| MAGEB4  | 0.0115  | 8.26E-01 | 8.86E-01 |
| MAGEB6  | 0.0012  | 9.82E-01 | 9.89E-01 |
| MAGEC1  | 0.0815  | 1.17E-01 | 2.10E-01 |
| MAGEC2  | 0.0791  | 1.29E-01 | 2.25E-01 |
| MAGEC3  | 0.2139  | 3.27E-05 | 2.35E-04 |
| MAGED1  | 0.0395  | 4.48E-01 | 5.79E-01 |
| MAGED2  | 0.0891  | 8.64E-02 | 1.65E-01 |
| MAGED4B | 0.0660  | 2.05E-01 | 3.22E-01 |
| MAGED4  | 0.0835  | 1.09E-01 | 1.98E-01 |
| MAGEE1  | 0.1772  | 6.08E-04 | 2.80E-03 |
| MAGEE2  | 0.1616  | 1.79E-03 | 7.01E-03 |
| MAGEF1  | 0.1032  | 4.69E-02 | 1.02E-01 |
| MAGEH1  | 0.0946  | 6.88E-02 | 1.38E-01 |
| MAGEL2  | -0.0797 | 1.25E-01 | 2.21E-01 |
| MAGI1   | -0.1663 | 1.31E-03 | 5.39E-03 |
| MAGI2   | -0.0561 | 2.81E-01 | 4.10E-01 |
| MAGI3   | -0.0182 | 7.27E-01 | 8.15E-01 |
| MAGIX   | -0.0832 | 1.10E-01 | 2.00E-01 |
| MAGOHB  | 0.2589  | 4.25E-07 | 5.31E-06 |
| MAGOH   | 0.2503  | 1.05E-06 | 1.18E-05 |
| MAGT1   | -0.1171 | 2.41E-02 | 5.97E-02 |
| MAG     | -0.0160 | 7.59E-01 | 8.38E-01 |
| MAK16   | 0.1219  | 1.88E-02 | 4.89E-02 |
| MAK     | 0.0448  | 3.89E-01 | 5.22E-01 |
| MAL2    | 0.1280  | 1.36E-02 | 3.77E-02 |
| MALAT1  | 0.2351  | 4.69E-06 | 4.40E-05 |
| MALL    | -0.0911 | 7.96E-02 | 1.55E-01 |
| MALT1   | 0.0772  | 1.38E-01 | 2.37E-01 |
| MAL     | -0.0285 | 5.84E-01 | 7.00E-01 |
| MAMDC2  | -0.2058 | 6.53E-05 | 4.24E-04 |
| MAMDC4  | 0.0069  | 8.95E-01 | 9.33E-01 |
| MAML1   | 0.1947  | 1.60E-04 | 9.11E-04 |
| MAML2   | -0.0409 | 4.32E-01 | 5.64E-01 |
| MAML3   | -0.1413 | 6.40E-03 | 2.02E-02 |
| MAMLD1  | 0.2193  | 2.03E-05 | 1.57E-04 |
| MAMSTR  | 0.2487  | 1.23E-06 | 1.37E-05 |
| MAN1A1  | -0.1220 | 1.87E-02 | 4.86E-02 |
| MAN1A2  | -0.1262 | 1.50E-02 | 4.07E-02 |
| MAN1B1  | 0.1074  | 3.87E-02 | 8.78E-02 |
| MAN1C1  | -0.2185 | 2.18E-05 | 1.66E-04 |
| MAN2A1  | -0.1335 | 1.01E-02 | 2.94E-02 |
| MAN2A2  | 0.0347  | 5.05E-01 | 6.30E-01 |

|           |         |          |          |
|-----------|---------|----------|----------|
| MAN2B1    | -0.0854 | 1.00E-01 | 1.86E-01 |
| MAN2B2    | -0.1274 | 1.41E-02 | 3.87E-02 |
| MAN2C1    | -0.1777 | 5.83E-04 | 2.70E-03 |
| MANBAL    | 0.0918  | 7.75E-02 | 1.52E-01 |
| MANBA     | -0.0679 | 1.92E-01 | 3.06E-01 |
| MANEAL    | -0.0267 | 6.09E-01 | 7.20E-01 |
| MANEA     | 0.0300  | 5.65E-01 | 6.82E-01 |
| MANF      | 0.0602  | 2.47E-01 | 3.72E-01 |
| MANSC1    | 0.1416  | 6.28E-03 | 1.99E-02 |
| MAOA      | -0.1735 | 7.92E-04 | 3.52E-03 |
| MAOB      | -0.1620 | 1.74E-03 | 6.85E-03 |
| MAP1A     | -0.0565 | 2.78E-01 | 4.06E-01 |
| MAP1B     | -0.1707 | 9.64E-04 | 4.17E-03 |
| MAP1D     | -0.0725 | 1.63E-01 | 2.70E-01 |
| MAP1LC3A  | -0.0674 | 1.95E-01 | 3.11E-01 |
| MAP1LC3B2 | -0.2141 | 3.22E-05 | 2.32E-04 |
| MAP1LC3B  | -0.2314 | 6.72E-06 | 5.97E-05 |
| MAP1LC3C  | -0.0380 | 4.65E-01 | 5.95E-01 |
| MAP1S     | 0.2207  | 1.79E-05 | 1.40E-04 |
| MAP2K1    | -0.1027 | 4.80E-02 | 1.04E-01 |
| MAP2K2    | 0.0076  | 8.83E-01 | 9.25E-01 |
| MAP2K3    | -0.2390 | 3.24E-06 | 3.18E-05 |
| MAP2K4    | -0.1167 | 2.46E-02 | 6.07E-02 |
| MAP2K5    | -0.0995 | 5.56E-02 | 1.17E-01 |
| MAP2K6    | 0.0933  | 7.26E-02 | 1.44E-01 |
| MAP2K7    | 0.0349  | 5.03E-01 | 6.28E-01 |
| MAP2      | 0.0014  | 9.78E-01 | 9.86E-01 |
| MAP3K10   | 0.1043  | 4.48E-02 | 9.86E-02 |
| MAP3K11   | 0.0275  | 5.98E-01 | 7.12E-01 |
| MAP3K12   | -0.0592 | 2.55E-01 | 3.81E-01 |
| MAP3K13   | -0.0597 | 2.52E-01 | 3.77E-01 |
| MAP3K14   | 0.1682  | 1.14E-03 | 4.82E-03 |
| MAP3K15   | 0.1213  | 1.95E-02 | 5.03E-02 |
| MAP3K1    | 0.1752  | 6.98E-04 | 3.16E-03 |
| MAP3K2    | -0.0774 | 1.37E-01 | 2.36E-01 |
| MAP3K3    | 0.1295  | 1.25E-02 | 3.51E-02 |
| MAP3K4    | 0.3160  | 4.79E-10 | 1.22E-08 |
| MAP3K5    | -0.0952 | 6.69E-02 | 1.35E-01 |
| MAP3K6    | -0.0261 | 6.16E-01 | 7.26E-01 |
| MAP3K7    | 0.1614  | 1.82E-03 | 7.10E-03 |
| MAP3K8    | 0.0031  | 9.52E-01 | 9.71E-01 |
| MAP3K9    | 0.1785  | 5.51E-04 | 2.58E-03 |
| MAP4K1    | -0.0187 | 7.20E-01 | 8.10E-01 |
| MAP4K2    | 0.0952  | 6.71E-02 | 1.36E-01 |

|           |         |          |          |
|-----------|---------|----------|----------|
| MAP4K3    | 0.0855  | 9.99E-02 | 1.86E-01 |
| MAP4K4    | 0.1105  | 3.34E-02 | 7.80E-02 |
| MAP4K5    | -0.0089 | 8.64E-01 | 9.12E-01 |
| MAP4      | -0.0028 | 9.57E-01 | 9.73E-01 |
| MAP6D1    | 0.0208  | 6.90E-01 | 7.86E-01 |
| MAP6      | -0.0618 | 2.35E-01 | 3.58E-01 |
| MAP7D1    | 0.0758  | 1.45E-01 | 2.47E-01 |
| MAP7D2    | 0.1535  | 3.04E-03 | 1.09E-02 |
| MAP7D3    | -0.0417 | 4.24E-01 | 5.56E-01 |
| MAP7      | -0.0215 | 6.79E-01 | 7.77E-01 |
| MAP9      | -0.0682 | 1.90E-01 | 3.04E-01 |
| MAPK10    | -0.0065 | 9.01E-01 | 9.37E-01 |
| MAPK11    | -0.0926 | 7.48E-02 | 1.48E-01 |
| MAPK12    | 0.0442  | 3.96E-01 | 5.29E-01 |
| MAPK13    | 0.2907  | 1.17E-08 | 2.14E-07 |
| MAPK14    | -0.0013 | 9.80E-01 | 9.87E-01 |
| MAPK15    | 0.1000  | 5.43E-02 | 1.15E-01 |
| MAPK1IP1L | 0.1699  | 1.02E-03 | 4.36E-03 |
| MAPK1     | 0.0465  | 3.72E-01 | 5.05E-01 |
| MAPK3     | 0.1707  | 9.60E-04 | 4.16E-03 |
| MAPK4     | -0.0958 | 6.53E-02 | 1.33E-01 |
| MAPK6     | -0.0398 | 4.44E-01 | 5.76E-01 |
| MAPK7     | 0.2037  | 7.75E-05 | 4.92E-04 |
| MAPK8IP1  | -0.1019 | 4.99E-02 | 1.07E-01 |
| MAPK8IP2  | 0.2737  | 8.45E-08 | 1.25E-06 |
| MAPK8IP3  | 0.2145  | 3.10E-05 | 2.25E-04 |
| MAPK8     | -0.0485 | 3.51E-01 | 4.84E-01 |
| MAPK9     | 0.1910  | 2.14E-04 | 1.17E-03 |
| MAPKAP1   | 0.1658  | 1.35E-03 | 5.52E-03 |
| MAPKAPK2  | 0.1506  | 3.65E-03 | 1.27E-02 |
| MAPKAPK3  | 0.0102  | 8.45E-01 | 8.99E-01 |
| MAPKAPK5  | 0.2796  | 4.31E-08 | 6.85E-07 |
| MAPKBP1   | 0.2093  | 4.86E-05 | 3.30E-04 |
| MAPKSP1   | -0.1518 | 3.37E-03 | 1.19E-02 |
| MAPRE1    | 0.2645  | 2.35E-07 | 3.13E-06 |
| MAPRE2    | -0.2594 | 4.03E-07 | 5.06E-06 |
| MAPRE3    | -0.0699 | 1.79E-01 | 2.90E-01 |
| MAPT      | 0.1102  | 3.38E-02 | 7.88E-02 |
| 10-Mar    | 0.0869  | 9.46E-02 | 1.78E-01 |
| 11-Mar    | 0.0674  | 1.95E-01 | 3.11E-01 |
| 1-Mar     | -0.0021 | 9.68E-01 | 9.80E-01 |
| 2-Mar     | -0.2615 | 3.25E-07 | 4.19E-06 |
| 3-Mar     | 0.2139  | 3.27E-05 | 2.35E-04 |
| 4-Mar     | -0.0206 | 6.93E-01 | 7.88E-01 |

|          |         |          |          |
|----------|---------|----------|----------|
| 5-Mar    | -0.2190 | 2.08E-05 | 1.60E-04 |
| 6-Mar    | -0.0156 | 7.64E-01 | 8.41E-01 |
| 7-Mar    | 0.1701  | 1.01E-03 | 4.33E-03 |
| 8-Mar    | -0.1034 | 4.65E-02 | 1.02E-01 |
| 9-Mar    | -0.0920 | 7.67E-02 | 1.51E-01 |
| MARCKSL1 | 0.1592  | 2.11E-03 | 8.04E-03 |
| MARCKS   | 0.1738  | 7.76E-04 | 3.46E-03 |
| MARCO    | -0.1326 | 1.06E-02 | 3.06E-02 |
| MARK1    | 0.0530  | 3.09E-01 | 4.38E-01 |
| MARK2    | 0.1811  | 4.57E-04 | 2.21E-03 |
| MARK3    | 0.0118  | 8.21E-01 | 8.83E-01 |
| MARK4    | 0.1781  | 5.68E-04 | 2.65E-03 |
| MARS2    | -0.0049 | 9.25E-01 | 9.52E-01 |
| MARS     | 0.1246  | 1.63E-02 | 4.36E-02 |
| MARVELD1 | -0.0293 | 5.74E-01 | 6.91E-01 |
| MARVELD2 | 0.0053  | 9.19E-01 | 9.49E-01 |
| MARVELD3 | -0.0027 | 9.59E-01 | 9.74E-01 |
| MAS1L    | -0.0443 | 3.95E-01 | 5.28E-01 |
| MAS1     | -0.0092 | 8.60E-01 | 9.09E-01 |
| MASP1    | -0.1838 | 3.73E-04 | 1.87E-03 |
| MASP2    | -0.2171 | 2.47E-05 | 1.86E-04 |
| MAST1    | 0.0915  | 7.84E-02 | 1.53E-01 |
| MAST2    | 0.3151  | 5.37E-10 | 1.35E-08 |
| MAST3    | 0.1255  | 1.56E-02 | 4.19E-02 |
| MAST4    | -0.1312 | 1.14E-02 | 3.25E-02 |
| MASTL    | 0.2365  | 4.12E-06 | 3.94E-05 |
| MAT1A    | -0.2059 | 6.45E-05 | 4.20E-04 |
| MAT2A    | 0.1090  | 3.59E-02 | 8.26E-02 |
| MAT2B    | -0.1378 | 7.84E-03 | 2.39E-02 |
| MATK     | -0.0819 | 1.15E-01 | 2.08E-01 |
| MATN1    | 0.0937  | 7.15E-02 | 1.43E-01 |
| MATN2    | -0.0637 | 2.21E-01 | 3.41E-01 |
| MATN3    | 0.0082  | 8.74E-01 | 9.19E-01 |
| MATN4    | 0.1198  | 2.10E-02 | 5.35E-02 |
| MATR3    | 0.1962  | 1.42E-04 | 8.26E-04 |
| MAVS     | 0.1456  | 4.95E-03 | 1.63E-02 |
| MAX      | 0.0715  | 1.69E-01 | 2.78E-01 |
| MAZ      | 0.1511  | 3.53E-03 | 1.24E-02 |
| MBD1     | 0.1189  | 2.19E-02 | 5.53E-02 |
| MBD2     | 0.0533  | 3.06E-01 | 4.35E-01 |
| MBD3L1   | 0.0634  | 2.23E-01 | 3.44E-01 |
| MBD3L2   | -0.0275 | 5.97E-01 | 7.10E-01 |
| MBD3L5   | -0.0697 | 1.80E-01 | 2.92E-01 |
| MBD3     | -0.0639 | 2.20E-01 | 3.40E-01 |

|         |         |          |          |
|---------|---------|----------|----------|
| MBD4    | 0.0350  | 5.02E-01 | 6.28E-01 |
| MBD5    | 0.0753  | 1.48E-01 | 2.51E-01 |
| MBD6    | 0.1960  | 1.45E-04 | 8.38E-04 |
| MBIP    | -0.0336 | 5.18E-01 | 6.42E-01 |
| MBL1P   | -0.1378 | 7.88E-03 | 2.40E-02 |
| MBL2    | -0.1205 | 2.02E-02 | 5.18E-02 |
| MBLAC1  | -0.0577 | 2.68E-01 | 3.95E-01 |
| MBLAC2  | -0.1331 | 1.03E-02 | 2.99E-02 |
| MBNL1   | -0.0668 | 1.99E-01 | 3.16E-01 |
| MBNL2   | -0.2143 | 3.15E-05 | 2.28E-04 |
| MBNL3   | 0.0352  | 4.99E-01 | 6.25E-01 |
| MBOAT1  | 0.1661  | 1.32E-03 | 5.43E-03 |
| MBOAT2  | 0.1189  | 2.19E-02 | 5.53E-02 |
| MBOAT4  | 0.0798  | 1.25E-01 | 2.21E-01 |
| MBOAT7  | 0.1072  | 3.90E-02 | 8.83E-02 |
| MBP     | -0.0922 | 7.62E-02 | 1.50E-01 |
| MBTD1   | 0.1805  | 4.76E-04 | 2.28E-03 |
| MBTPS1  | -0.2189 | 2.11E-05 | 1.62E-04 |
| MBTPS2  | -0.0545 | 2.95E-01 | 4.25E-01 |
| MB      | -0.0442 | 3.96E-01 | 5.28E-01 |
| MC1R    | 0.0444  | 3.94E-01 | 5.27E-01 |
| MC2R    | 0.0258  | 6.21E-01 | 7.30E-01 |
| MC3R    | 0.0600  | 2.49E-01 | 3.74E-01 |
| MC4R    | -0.0026 | 9.60E-01 | 9.75E-01 |
| MC5R    | 0.0807  | 1.21E-01 | 2.15E-01 |
| MCAM    | 0.0176  | 7.35E-01 | 8.21E-01 |
| MCART1  | 0.1509  | 3.57E-03 | 1.25E-02 |
| MCART2  | 0.0799  | 1.24E-01 | 2.20E-01 |
| MCART3P | 0.1115  | 3.18E-02 | 7.49E-02 |
| MCART6  | -0.0040 | 9.38E-01 | 9.61E-01 |
| MCAT    | -0.1240 | 1.69E-02 | 4.47E-02 |
| MCCC1   | -0.1420 | 6.15E-03 | 1.95E-02 |
| MCCC2   | -0.4461 | 1.52E-19 | 3.40E-17 |
| MCCD1   | 0.1146  | 2.73E-02 | 6.62E-02 |
| MCC     | -0.1446 | 5.26E-03 | 1.72E-02 |
| MCEE    | -0.2767 | 6.07E-08 | 9.27E-07 |
| MCF2L2  | 0.0881  | 9.01E-02 | 1.71E-01 |
| MCF2L   | -0.0575 | 2.69E-01 | 3.97E-01 |
| MCF2    | 0.0366  | 4.83E-01 | 6.11E-01 |
| MCFD2   | -0.0684 | 1.89E-01 | 3.02E-01 |
| MCHR1   | -0.0686 | 1.88E-01 | 3.01E-01 |
| MCHR2   | 0.0879  | 9.09E-02 | 1.72E-01 |
| MCL1    | 0.1901  | 2.31E-04 | 1.25E-03 |
| MCM10   | 0.4001  | 1.07E-15 | 8.58E-14 |



|          |         |          |          |
|----------|---------|----------|----------|
| MCM2     | 0.4404  | 4.96E-19 | 9.94E-17 |
| MCM3APAS | 0.2899  | 1.29E-08 | 2.33E-07 |
| MCM3AP   | 0.1219  | 1.88E-02 | 4.89E-02 |
| MCM3     | 0.4168  | 5.08E-17 | 5.45E-15 |
| MCM4     | 0.3165  | 4.49E-10 | 1.15E-08 |
| MCM5     | 0.4317  | 2.84E-18 | 4.35E-16 |
| MCM6     | 0.4389  | 6.63E-19 | 1.26E-16 |
| MCM7     | 0.3659  | 3.41E-13 | 1.65E-11 |
| MCM8     | 0.3167  | 4.37E-10 | 1.13E-08 |
| MCM9     | 0.2725  | 9.66E-08 | 1.40E-06 |
| MCOLN1   | -0.1578 | 2.31E-03 | 8.68E-03 |
| MCOLN2   | 0.0217  | 6.77E-01 | 7.75E-01 |
| MCOLN3   | 0.2169  | 2.51E-05 | 1.89E-04 |
| MCPH1    | 0.0360  | 4.90E-01 | 6.17E-01 |
| MCRS1    | 0.2783  | 5.02E-08 | 7.81E-07 |
| MCTP1    | -0.0361 | 4.89E-01 | 6.16E-01 |
| MCTP2    | 0.0475  | 3.61E-01 | 4.93E-01 |
| MCTS1    | 0.1121  | 3.08E-02 | 7.30E-02 |
| MDC1     | 0.4702  | 8.42E-22 | 2.66E-19 |
| MDFIC    | -0.1095 | 3.49E-02 | 8.09E-02 |
| MDFI     | 0.0631  | 2.25E-01 | 3.47E-01 |
| MDGA1    | 0.0355  | 4.96E-01 | 6.22E-01 |
| MDGA2    | 0.0049  | 9.25E-01 | 9.52E-01 |
| MDH1B    | 0.1979  | 1.25E-04 | 7.36E-04 |
| MDH1     | -0.1533 | 3.08E-03 | 1.10E-02 |
| MDH2     | -0.2672 | 1.74E-07 | 2.39E-06 |
| MDK      | 0.2360  | 4.32E-06 | 4.10E-05 |
| MDM1     | 0.2156  | 2.80E-05 | 2.07E-04 |
| MDM2     | 0.0038  | 9.41E-01 | 9.64E-01 |
| MDM4     | 0.3978  | 1.63E-15 | 1.24E-13 |
| MDN1     | 0.0406  | 4.35E-01 | 5.67E-01 |
| MDP1     | -0.0554 | 2.87E-01 | 4.16E-01 |
| MDS2     | 0.1508  | 3.60E-03 | 1.26E-02 |
| ME1      | 0.0233  | 6.55E-01 | 7.57E-01 |
| ME2      | 0.1007  | 5.25E-02 | 1.12E-01 |
| ME3      | 0.1041  | 4.51E-02 | 9.91E-02 |
| MEA1     | 0.1402  | 6.82E-03 | 2.13E-02 |
| MEAF6    | -0.0664 | 2.02E-01 | 3.19E-01 |
| MECOM    | 0.0783  | 1.32E-01 | 2.30E-01 |
| MECP2    | 0.2450  | 1.79E-06 | 1.90E-05 |
| MECR     | -0.2984 | 4.57E-09 | 9.22E-08 |
| MED10    | 0.2008  | 9.85E-05 | 6.02E-04 |
| MED11    | -0.1534 | 3.05E-03 | 1.10E-02 |
| MED12L   | -0.0182 | 7.27E-01 | 8.15E-01 |

|         |         |          |          |
|---------|---------|----------|----------|
| MED12   | 0.2679  | 1.61E-07 | 2.24E-06 |
| MED13L  | 0.0227  | 6.63E-01 | 7.64E-01 |
| MED13   | 0.1662  | 1.31E-03 | 5.40E-03 |
| MED14   | 0.0486  | 3.50E-01 | 4.82E-01 |
| MED15   | 0.3035  | 2.41E-09 | 5.20E-08 |
| MED16   | -0.0086 | 8.69E-01 | 9.16E-01 |
| MED17   | 0.2267  | 1.03E-05 | 8.67E-05 |
| MED18   | -0.1902 | 2.29E-04 | 1.24E-03 |
| MED19   | 0.1726  | 8.41E-04 | 3.70E-03 |
| MED1    | 0.0901  | 8.31E-02 | 1.60E-01 |
| MED20   | 0.2178  | 2.32E-05 | 1.76E-04 |
| MED21   | 0.1889  | 2.53E-04 | 1.35E-03 |
| MED22   | 0.3041  | 2.24E-09 | 4.88E-08 |
| MED23   | 0.2346  | 4.94E-06 | 4.60E-05 |
| MED24   | 0.1758  | 6.69E-04 | 3.04E-03 |
| MED25   | 0.0988  | 5.74E-02 | 1.20E-01 |
| MED26   | 0.1584  | 2.21E-03 | 8.35E-03 |
| MED27   | 0.1638  | 1.55E-03 | 6.21E-03 |
| MED28   | 0.1070  | 3.93E-02 | 8.89E-02 |
| MED29   | -0.0036 | 9.44E-01 | 9.66E-01 |
| MED30   | 0.1592  | 2.09E-03 | 8.01E-03 |
| MED31   | -0.0449 | 3.88E-01 | 5.21E-01 |
| MED4    | -0.0250 | 6.32E-01 | 7.39E-01 |
| MED6    | 0.1018  | 5.02E-02 | 1.08E-01 |
| MED7    | 0.1911  | 2.13E-04 | 1.16E-03 |
| MED8    | 0.1967  | 1.37E-04 | 8.00E-04 |
| MED9    | -0.0492 | 3.45E-01 | 4.77E-01 |
| MEF2A   | -0.0970 | 6.21E-02 | 1.28E-01 |
| MEF2B   | 0.0660  | 2.05E-01 | 3.23E-01 |
| MEF2C   | -0.1554 | 2.68E-03 | 9.83E-03 |
| MEF2D   | 0.2909  | 1.14E-08 | 2.09E-07 |
| MEFV    | -0.0747 | 1.51E-01 | 2.55E-01 |
| MEG3    | 0.0626  | 2.29E-01 | 3.52E-01 |
| MEG8    | 0.0454  | 3.84E-01 | 5.17E-01 |
| MEGF10  | -0.0515 | 3.22E-01 | 4.52E-01 |
| MEGF11  | 0.0816  | 1.16E-01 | 2.09E-01 |
| MEGF6   | -0.1022 | 4.91E-02 | 1.06E-01 |
| MEGF8   | -0.0695 | 1.82E-01 | 2.94E-01 |
| MEGF9   | -0.0705 | 1.75E-01 | 2.86E-01 |
| MEI1    | 0.0568  | 2.75E-01 | 4.03E-01 |
| MEIG1   | 0.0218  | 6.76E-01 | 7.74E-01 |
| MEIS1   | 0.0990  | 5.67E-02 | 1.19E-01 |
| MEIS2   | -0.0317 | 5.43E-01 | 6.64E-01 |
| MEIS3P1 | -0.1890 | 2.52E-04 | 1.34E-03 |

|          |         |          |          |
|----------|---------|----------|----------|
| MEIS3    | -0.0251 | 6.30E-01 | 7.38E-01 |
| MELK     | 0.4340  | 1.78E-18 | 2.88E-16 |
| MEMO1    | 0.0795  | 1.26E-01 | 2.22E-01 |
| MEN1     | 0.1384  | 7.61E-03 | 2.33E-02 |
| MEOX1    | -0.0244 | 6.40E-01 | 7.46E-01 |
| MEOX2    | -0.0708 | 1.74E-01 | 2.84E-01 |
| MEP1A    | 0.1667  | 1.27E-03 | 5.28E-03 |
| MEP1B    | -0.0873 | 9.32E-02 | 1.76E-01 |
| MEPCE    | -0.0905 | 8.16E-02 | 1.58E-01 |
| MEPE     | 0.0108  | 8.36E-01 | 8.93E-01 |
| MERTK    | -0.0668 | 1.99E-01 | 3.15E-01 |
| MESDC1   | 0.1496  | 3.88E-03 | 1.34E-02 |
| MESDC2   | 0.0533  | 3.06E-01 | 4.36E-01 |
| MESP1    | 0.1929  | 1.86E-04 | 1.03E-03 |
| MESP2    | 0.3346  | 3.74E-11 | 1.21E-09 |
| MESTIT1  | 0.0339  | 5.16E-01 | 6.40E-01 |
| MEST     | 0.0805  | 1.22E-01 | 2.17E-01 |
| METAP1   | 0.0774  | 1.37E-01 | 2.36E-01 |
| METAP2   | 0.1124  | 3.04E-02 | 7.21E-02 |
| METRNL   | -0.0054 | 9.17E-01 | 9.48E-01 |
| METRNL   | -0.1780 | 5.71E-04 | 2.66E-03 |
| METT10D  | 0.0793  | 1.27E-01 | 2.24E-01 |
| METT11D1 | 0.1869  | 2.95E-04 | 1.54E-03 |
| METT5D1  | -0.1349 | 9.27E-03 | 2.75E-02 |
| METTL10  | -0.0277 | 5.94E-01 | 7.08E-01 |
| METTL11A | -0.0188 | 7.19E-01 | 8.09E-01 |
| METTL11B | 0.2740  | 8.22E-08 | 1.22E-06 |
| METTL12  | 0.0646  | 2.15E-01 | 3.34E-01 |
| METTL13  | 0.4358  | 1.25E-18 | 2.18E-16 |
| METTL14  | -0.0828 | 1.12E-01 | 2.03E-01 |
| METTL1   | 0.1899  | 2.34E-04 | 1.26E-03 |
| METTL2A  | 0.2573  | 5.07E-07 | 6.19E-06 |
| METTL2B  | -0.0691 | 1.84E-01 | 2.97E-01 |
| METTL3   | 0.1929  | 1.86E-04 | 1.04E-03 |
| METTL4   | 0.2291  | 8.30E-06 | 7.12E-05 |
| METTL5   | 0.1743  | 7.48E-04 | 3.35E-03 |
| METTL6   | 0.2270  | 1.01E-05 | 8.50E-05 |
| METTL7A  | -0.3564 | 1.48E-12 | 6.36E-11 |
| METTL7B  | -0.1842 | 3.63E-04 | 1.83E-03 |
| METTL8   | 0.0163  | 7.55E-01 | 8.35E-01 |
| METTL9   | 0.2061  | 6.37E-05 | 4.16E-04 |
| MET      | -0.1275 | 1.40E-02 | 3.85E-02 |
| MEX3A    | 0.3137  | 6.46E-10 | 1.59E-08 |
| MEX3B    | 0.0393  | 4.50E-01 | 5.82E-01 |

|          |         |          |          |
|----------|---------|----------|----------|
| MEX3C    | 0.0853  | 1.01E-01 | 1.87E-01 |
| MEX3D    | 0.1528  | 3.16E-03 | 1.13E-02 |
| MFAP1    | 0.1380  | 7.78E-03 | 2.38E-02 |
| MFAP2    | 0.0808  | 1.20E-01 | 2.15E-01 |
| MFAP3L   | -0.2303 | 7.43E-06 | 6.49E-05 |
| MFAP3    | -0.0182 | 7.27E-01 | 8.14E-01 |
| MFAP4    | -0.1203 | 2.05E-02 | 5.24E-02 |
| MFAP5    | -0.1653 | 1.40E-03 | 5.69E-03 |
| MFF      | 0.1884  | 2.62E-04 | 1.39E-03 |
| MFGE8    | -0.0432 | 4.07E-01 | 5.39E-01 |
| MFHAS1   | -0.0086 | 8.69E-01 | 9.15E-01 |
| MFI2     | 0.2863  | 1.97E-08 | 3.41E-07 |
| MFN1     | 0.0053  | 9.19E-01 | 9.49E-01 |
| MFN2     | -0.2205 | 1.83E-05 | 1.43E-04 |
| MFNG     | -0.0318 | 5.41E-01 | 6.62E-01 |
| MFRP     | -0.0999 | 5.45E-02 | 1.15E-01 |
| MFSD10   | 0.2160  | 2.71E-05 | 2.01E-04 |
| MFSD11   | -0.0266 | 6.09E-01 | 7.21E-01 |
| MFSD1    | -0.1759 | 6.65E-04 | 3.03E-03 |
| MFSD2A   | -0.2308 | 7.06E-06 | 6.22E-05 |
| MFSD2B   | 0.2260  | 1.10E-05 | 9.16E-05 |
| MFSD3    | -0.2262 | 1.09E-05 | 9.06E-05 |
| MFSD4    | 0.1537  | 2.99E-03 | 1.08E-02 |
| MFSD5    | 0.1153  | 2.64E-02 | 6.44E-02 |
| MFSD6L   | 0.0827  | 1.12E-01 | 2.03E-01 |
| MFSD6    | 0.1431  | 5.75E-03 | 1.85E-02 |
| MFSD7    | -0.0681 | 1.91E-01 | 3.05E-01 |
| MFSD8    | -0.1912 | 2.11E-04 | 1.15E-03 |
| MFSD9    | -0.1692 | 1.07E-03 | 4.55E-03 |
| MGAM     | 0.0734  | 1.58E-01 | 2.64E-01 |
| MGAT1    | -0.1668 | 1.27E-03 | 5.25E-03 |
| MGAT2    | -0.2189 | 2.11E-05 | 1.62E-04 |
| MGAT3    | -0.0244 | 6.40E-01 | 7.46E-01 |
| MGAT4A   | 0.1573  | 2.37E-03 | 8.86E-03 |
| MGAT4B   | -0.0792 | 1.28E-01 | 2.25E-01 |
| MGAT4C   | -0.0407 | 4.35E-01 | 5.67E-01 |
| MGAT5B   | -0.0376 | 4.70E-01 | 5.99E-01 |
| MGAT5    | -0.0308 | 5.55E-01 | 6.74E-01 |
| MGA      | 0.1374  | 8.04E-03 | 2.44E-02 |
| MGC12916 | -0.0293 | 5.74E-01 | 6.91E-01 |
| MGC12982 | 0.2664  | 1.91E-07 | 2.61E-06 |
| MGC14436 | -0.1223 | 1.84E-02 | 4.80E-02 |
| MGC15885 | 0.0314  | 5.47E-01 | 6.67E-01 |
| MGC16025 | 0.0981  | 5.90E-02 | 1.22E-01 |

|          |         |          |          |
|----------|---------|----------|----------|
| MGC16121 | 0.0356  | 4.94E-01 | 6.21E-01 |
| MGC16142 | 0.1007  | 5.25E-02 | 1.12E-01 |
| MGC16275 | 0.1342  | 9.68E-03 | 2.85E-02 |
| MGC16384 | 0.0067  | 8.97E-01 | 9.35E-01 |
| MGC16703 | -0.0174 | 7.38E-01 | 8.23E-01 |
| MGC21881 | -0.1233 | 1.75E-02 | 4.61E-02 |
| MGC23270 | 0.0096  | 8.54E-01 | 9.06E-01 |
| MGC23284 | 0.0118  | 8.21E-01 | 8.83E-01 |
| MGC26647 | -0.0765 | 1.42E-01 | 2.43E-01 |
| MGC27382 | -0.0793 | 1.28E-01 | 2.24E-01 |
| MGC2752  | 0.0535  | 3.04E-01 | 4.34E-01 |
| MGC2889  | 0.0366  | 4.83E-01 | 6.11E-01 |
| MGC29506 | -0.0102 | 8.45E-01 | 8.99E-01 |
| MGC34034 | 0.0026  | 9.60E-01 | 9.75E-01 |
| MGC3771  | 0.0034  | 9.48E-01 | 9.68E-01 |
| MGC42105 | -0.0962 | 6.42E-02 | 1.31E-01 |
| MGC4473  | 0.0795  | 1.26E-01 | 2.23E-01 |
| MGC45800 | 0.0034  | 9.48E-01 | 9.68E-01 |
| MGC57346 | 0.3317  | 5.63E-11 | 1.74E-09 |
| MGC70857 | -0.1532 | 3.09E-03 | 1.11E-02 |
| MGC72080 | -0.1571 | 2.40E-03 | 8.96E-03 |
| MGC87042 | -0.0306 | 5.57E-01 | 6.75E-01 |
| MGEA5    | -0.1521 | 3.31E-03 | 1.17E-02 |
| MGLL     | -0.0591 | 2.56E-01 | 3.82E-01 |
| MGMT     | -0.1108 | 3.29E-02 | 7.71E-02 |
| MGP      | -0.0732 | 1.60E-01 | 2.66E-01 |
| MGRN1    | -0.0337 | 5.17E-01 | 6.42E-01 |
| MGST1    | -0.1914 | 2.09E-04 | 1.14E-03 |
| MGST2    | -0.2543 | 6.92E-07 | 8.16E-06 |
| MGST3    | 0.0214  | 6.81E-01 | 7.78E-01 |
| MIA2     | -0.1248 | 1.61E-02 | 4.31E-02 |
| MIA3     | -0.0912 | 7.93E-02 | 1.55E-01 |
| MIAT     | 0.0721  | 1.66E-01 | 2.74E-01 |
| MIA      | 0.2141  | 3.22E-05 | 2.32E-04 |
| MIB1     | 0.0167  | 7.49E-01 | 8.31E-01 |
| MIB2     | -0.0516 | 3.22E-01 | 4.52E-01 |
| MICAL1   | 0.1116  | 3.17E-02 | 7.47E-02 |
| MICAL2   | -0.0971 | 6.18E-02 | 1.27E-01 |
| MICAL3   | -0.0694 | 1.82E-01 | 2.94E-01 |
| MICALCL  | -0.1314 | 1.13E-02 | 3.23E-02 |
| MICALL1  | 0.0955  | 6.61E-02 | 1.34E-01 |
| MICALL2  | 0.1601  | 1.99E-03 | 7.65E-03 |
| MICA     | 0.1399  | 6.95E-03 | 2.16E-02 |
| MICB     | 0.1801  | 4.91E-04 | 2.34E-03 |

|          |         |          |          |
|----------|---------|----------|----------|
| MID1IP1  | 0.1371  | 8.19E-03 | 2.48E-02 |
| MID1     | 0.0312  | 5.49E-01 | 6.69E-01 |
| MID2     | 0.0378  | 4.68E-01 | 5.98E-01 |
| MIDN     | 0.0405  | 4.36E-01 | 5.68E-01 |
| MIER1    | -0.1122 | 3.07E-02 | 7.28E-02 |
| MIER2    | 0.1205  | 2.02E-02 | 5.18E-02 |
| MIER3    | 0.0035  | 9.47E-01 | 9.67E-01 |
| MIF4GD   | -0.0388 | 4.57E-01 | 5.87E-01 |
| MIF      | 0.0481  | 3.56E-01 | 4.88E-01 |
| MIIP     | 0.1346  | 9.44E-03 | 2.79E-02 |
| MIMT1    | 0.1541  | 2.93E-03 | 1.06E-02 |
| MINA     | 0.0549  | 2.91E-01 | 4.20E-01 |
| MINK1    | 0.0075  | 8.85E-01 | 9.27E-01 |
| MINPP1   | -0.1744 | 7.41E-04 | 3.33E-03 |
| MIOS     | 0.0136  | 7.93E-01 | 8.63E-01 |
| MIOX     | 0.2334  | 5.55E-06 | 5.06E-05 |
| MIPEP    | -0.2160 | 2.71E-05 | 2.01E-04 |
| MIPOL1   | 0.2225  | 1.52E-05 | 1.21E-04 |
| MIP      | -0.2757 | 6.75E-08 | 1.02E-06 |
| MIR155HG | 0.0705  | 1.76E-01 | 2.86E-01 |
| MIR17HG  | 0.1623  | 1.71E-03 | 6.77E-03 |
| MIS12    | 0.1225  | 1.82E-02 | 4.76E-02 |
| MITD1    | 0.3042  | 2.22E-09 | 4.84E-08 |
| MITF     | -0.0507 | 3.30E-01 | 4.61E-01 |
| MIXL1    | 0.0936  | 7.17E-02 | 1.43E-01 |
| MKI67IP  | 0.1833  | 3.88E-04 | 1.93E-03 |
| MKI67    | 0.3800  | 3.42E-14 | 2.00E-12 |
| MKKS     | 0.1075  | 3.85E-02 | 8.74E-02 |
| MKL1     | 0.0913  | 7.91E-02 | 1.54E-01 |
| MKL2     | -0.0662 | 2.03E-01 | 3.20E-01 |
| MKLN1    | -0.1830 | 3.96E-04 | 1.97E-03 |
| MKNK1    | 0.1186  | 2.24E-02 | 5.63E-02 |
| MKNK2    | -0.1214 | 1.93E-02 | 5.00E-02 |
| MKRN1    | -0.0763 | 1.43E-01 | 2.44E-01 |
| MKRN2    | 0.0428  | 4.11E-01 | 5.44E-01 |
| MKRN3    | -0.0189 | 7.17E-01 | 8.07E-01 |
| MKS1     | 0.2304  | 7.34E-06 | 6.43E-05 |
| MKX      | -0.1321 | 1.09E-02 | 3.13E-02 |
| MLANA    | -0.0803 | 1.23E-01 | 2.18E-01 |
| MLC1     | -0.1593 | 2.09E-03 | 8.00E-03 |
| MLEC     | -0.0652 | 2.10E-01 | 3.29E-01 |
| MLF1IP   | 0.2924  | 9.50E-09 | 1.78E-07 |
| MLF1     | 0.0175  | 7.37E-01 | 8.22E-01 |
| MLF2     | -0.1593 | 2.08E-03 | 7.98E-03 |

|        |         |          |          |
|--------|---------|----------|----------|
| MLH1   | 0.0019  | 9.72E-01 | 9.82E-01 |
| MLH3   | 0.1135  | 2.88E-02 | 6.93E-02 |
| MLKL   | 0.0355  | 4.96E-01 | 6.22E-01 |
| MLL2   | 0.1029  | 4.76E-02 | 1.04E-01 |
| MLL3   | -0.0680 | 1.91E-01 | 3.06E-01 |
| MLL4   | 0.1943  | 1.67E-04 | 9.41E-04 |
| MLL5   | 0.0299  | 5.65E-01 | 6.83E-01 |
| MLLT10 | 0.0839  | 1.07E-01 | 1.95E-01 |
| MLLT11 | 0.2290  | 8.41E-06 | 7.19E-05 |
| MLLT1  | 0.0863  | 9.71E-02 | 1.82E-01 |
| MLLT3  | -0.0251 | 6.30E-01 | 7.38E-01 |
| MLLT4  | 0.1267  | 1.46E-02 | 3.98E-02 |
| MLLT6  | 0.2866  | 1.90E-08 | 3.31E-07 |
| MLL    | 0.1676  | 1.19E-03 | 4.99E-03 |
| MLNR   | -0.0422 | 4.18E-01 | 5.51E-01 |
| MLN    | -0.0096 | 8.54E-01 | 9.05E-01 |
| MLPH   | -0.0568 | 2.75E-01 | 4.04E-01 |
| MLST8  | 0.0353  | 4.98E-01 | 6.24E-01 |
| MLXIPL | -0.0534 | 3.05E-01 | 4.34E-01 |
| MLXIP  | -0.1366 | 8.40E-03 | 2.54E-02 |
| MLX    | 0.0185  | 7.23E-01 | 8.12E-01 |
| MLYCD  | -0.4089 | 2.18E-16 | 2.02E-14 |
| MMAA   | -0.2978 | 4.93E-09 | 9.85E-08 |
| MMAB   | -0.1615 | 1.81E-03 | 7.08E-03 |
| MMACHC | -0.2398 | 2.99E-06 | 2.96E-05 |
| MMADHC | -0.1362 | 8.62E-03 | 2.59E-02 |
| MMD2   | 0.1170  | 2.42E-02 | 6.00E-02 |
| MMD    | 0.1892  | 2.47E-04 | 1.32E-03 |
| MMEL1  | 0.0868  | 9.50E-02 | 1.79E-01 |
| MME    | -0.1427 | 5.88E-03 | 1.88E-02 |
| MMGT1  | 0.2002  | 1.04E-04 | 6.27E-04 |
| MMP10  | 0.1622  | 1.73E-03 | 6.80E-03 |
| MMP11  | 0.0743  | 1.53E-01 | 2.58E-01 |
| MMP12  | 0.0996  | 5.52E-02 | 1.16E-01 |
| MMP13  | 0.1420  | 6.13E-03 | 1.95E-02 |
| MMP14  | 0.0455  | 3.83E-01 | 5.16E-01 |
| MMP15  | -0.1451 | 5.10E-03 | 1.68E-02 |
| MMP16  | 0.0404  | 4.38E-01 | 5.70E-01 |
| MMP17  | 0.0486  | 3.51E-01 | 4.83E-01 |
| MMP19  | -0.1250 | 1.60E-02 | 4.29E-02 |
| MMP1   | 0.1807  | 4.69E-04 | 2.25E-03 |
| MMP20  | 0.0237  | 6.50E-01 | 7.53E-01 |
| MMP21  | 0.0255  | 6.24E-01 | 7.33E-01 |
| MMP23A | -0.0211 | 6.86E-01 | 7.82E-01 |

|         |         |          |          |
|---------|---------|----------|----------|
| MMP23B  | -0.1091 | 3.57E-02 | 8.23E-02 |
| MMP24   | -0.1035 | 4.63E-02 | 1.01E-01 |
| MMP25   | -0.0054 | 9.18E-01 | 9.48E-01 |
| MMP26   | 0.0403  | 4.38E-01 | 5.70E-01 |
| MMP27   | 0.1664  | 1.30E-03 | 5.36E-03 |
| MMP28   | -0.0807 | 1.21E-01 | 2.15E-01 |
| MMP2    | -0.0733 | 1.59E-01 | 2.65E-01 |
| MMP3    | 0.0036  | 9.44E-01 | 9.66E-01 |
| MMP7    | 0.1372  | 8.15E-03 | 2.47E-02 |
| MMP8    | -0.0193 | 7.11E-01 | 8.02E-01 |
| MMP9    | 0.1009  | 5.21E-02 | 1.11E-01 |
| MMRN1   | -0.2402 | 2.88E-06 | 2.85E-05 |
| MMRN2   | -0.2994 | 4.02E-09 | 8.28E-08 |
| MMS19   | 0.0917  | 7.77E-02 | 1.52E-01 |
| MN1     | -0.0312 | 5.50E-01 | 6.70E-01 |
| MNAT1   | 0.0725  | 1.63E-01 | 2.70E-01 |
| MND1    | 0.3100  | 1.05E-09 | 2.46E-08 |
| MNDA    | 0.0109  | 8.34E-01 | 8.91E-01 |
| MNS1    | 0.1588  | 2.16E-03 | 8.22E-03 |
| MNT     | 0.1008  | 5.24E-02 | 1.12E-01 |
| MNX1    | 0.1461  | 4.81E-03 | 1.60E-02 |
| MOAP1   | 0.0044  | 9.32E-01 | 9.58E-01 |
| MOB2    | 0.0025  | 9.62E-01 | 9.76E-01 |
| MOBKL1A | -0.0898 | 8.43E-02 | 1.62E-01 |
| MOBKL1B | -0.0839 | 1.07E-01 | 1.96E-01 |
| MOBKL2A | 0.1543  | 2.88E-03 | 1.04E-02 |
| MOBKL2B | 0.1428  | 5.87E-03 | 1.88E-02 |
| MOBKL2C | -0.0048 | 9.26E-01 | 9.53E-01 |
| MOBKL3  | 0.1843  | 3.59E-04 | 1.81E-03 |
| MOBP    | 0.0589  | 2.58E-01 | 3.83E-01 |
| MOCOS   | -0.1571 | 2.41E-03 | 8.97E-03 |
| MOCS1   | -0.2230 | 1.45E-05 | 1.17E-04 |
| MOCS2   | -0.2943 | 7.52E-09 | 1.44E-07 |
| MOCS3   | 0.0860  | 9.80E-02 | 1.83E-01 |
| MOGAT1  | -0.2464 | 1.55E-06 | 1.67E-05 |
| MOGAT2  | -0.2145 | 3.09E-05 | 2.24E-04 |
| MOGAT3  | 0.0550  | 2.91E-01 | 4.20E-01 |
| MOGS    | 0.1338  | 9.90E-03 | 2.90E-02 |
| MOG     | -0.0515 | 3.22E-01 | 4.53E-01 |
| MON1A   | -0.0930 | 7.35E-02 | 1.46E-01 |
| MON1B   | -0.2317 | 6.51E-06 | 5.81E-05 |
| MON2    | 0.0817  | 1.16E-01 | 2.09E-01 |
| MORC1   | 0.0135  | 7.95E-01 | 8.64E-01 |
| MORC2   | 0.3213  | 2.35E-10 | 6.44E-09 |



|           |         |          |          |
|-----------|---------|----------|----------|
| MORC3     | -0.0005 | 9.93E-01 | 9.96E-01 |
| MORC4     | 0.0769  | 1.39E-01 | 2.40E-01 |
| MORF4L1   | 0.1192  | 2.17E-02 | 5.48E-02 |
| MORF4L2   | 0.1470  | 4.56E-03 | 1.53E-02 |
| MORF4     | 0.0348  | 5.04E-01 | 6.29E-01 |
| MORN1     | 0.0134  | 7.97E-01 | 8.66E-01 |
| MORN2     | 0.1331  | 1.03E-02 | 2.98E-02 |
| MORN3     | 0.1471  | 4.53E-03 | 1.52E-02 |
| MORN4     | -0.0366 | 4.82E-01 | 6.10E-01 |
| MORN5     | 0.1178  | 2.32E-02 | 5.80E-02 |
| MOSC1     | 0.0153  | 7.69E-01 | 8.44E-01 |
| MOSC2     | -0.2087 | 5.11E-05 | 3.44E-04 |
| MOSPD1    | 0.1763  | 6.46E-04 | 2.96E-03 |
| MOSPD2    | 0.0518  | 3.19E-01 | 4.49E-01 |
| MOSPD3    | -0.1082 | 3.72E-02 | 8.52E-02 |
| MOS       | -0.0906 | 8.13E-02 | 1.58E-01 |
| MOV10L1   | 0.0814  | 1.18E-01 | 2.11E-01 |
| MOV10     | 0.0792  | 1.28E-01 | 2.25E-01 |
| MOXD1     | -0.0176 | 7.36E-01 | 8.22E-01 |
| MPDU1     | -0.1864 | 3.06E-04 | 1.59E-03 |
| MPDZ      | -0.2986 | 4.46E-09 | 9.05E-08 |
| MPEG1     | -0.1605 | 1.93E-03 | 7.47E-03 |
| MPG       | -0.1439 | 5.49E-03 | 1.78E-02 |
| MPHOSPH10 | 0.0570  | 2.73E-01 | 4.01E-01 |
| MPHOSPH6  | 0.0619  | 2.34E-01 | 3.57E-01 |
| MPHOSPH8  | 0.0125  | 8.10E-01 | 8.75E-01 |
| MPHOSPH9  | 0.0748  | 1.50E-01 | 2.54E-01 |
| MPI       | -0.2640 | 2.48E-07 | 3.29E-06 |
| MPL       | -0.0824 | 1.13E-01 | 2.05E-01 |
| MPND      | -0.2043 | 7.36E-05 | 4.71E-04 |
| MPO       | -0.1109 | 3.28E-02 | 7.69E-02 |
| MPP1      | -0.1418 | 6.21E-03 | 1.97E-02 |
| MPP2      | 0.2477  | 1.36E-06 | 1.48E-05 |
| MPP3      | 0.3336  | 4.30E-11 | 1.37E-09 |
| MPP4      | 0.0955  | 6.63E-02 | 1.34E-01 |
| MPP5      | -0.2125 | 3.69E-05 | 2.61E-04 |
| MPP6      | 0.1837  | 3.75E-04 | 1.88E-03 |
| MPP7      | 0.1147  | 2.71E-02 | 6.58E-02 |
| MPPE1     | 0.0073  | 8.89E-01 | 9.29E-01 |
| MPPED1    | -0.1513 | 3.48E-03 | 1.22E-02 |
| MPPED2    | -0.0468 | 3.69E-01 | 5.02E-01 |
| MPRIP     | -0.0606 | 2.44E-01 | 3.68E-01 |
| MPST      | -0.0191 | 7.13E-01 | 8.04E-01 |
| MPV17L2   | -0.1093 | 3.53E-02 | 8.16E-02 |

|          |         |          |          |
|----------|---------|----------|----------|
| MPV17L   | -0.0386 | 4.59E-01 | 5.90E-01 |
| MPV17    | 0.0724  | 1.64E-01 | 2.72E-01 |
| MPZL1    | 0.3822  | 2.40E-14 | 1.44E-12 |
| MPZL2    | 0.0030  | 9.55E-01 | 9.72E-01 |
| MPZL3    | -0.0180 | 7.30E-01 | 8.17E-01 |
| MPZ      | 0.0976  | 6.05E-02 | 1.25E-01 |
| MR1      | -0.0697 | 1.81E-01 | 2.93E-01 |
| MRAP2    | 0.1410  | 6.52E-03 | 2.05E-02 |
| MRAP     | -0.0956 | 6.59E-02 | 1.34E-01 |
| MRAS     | -0.0873 | 9.32E-02 | 1.76E-01 |
| MRC1     | -0.1895 | 2.41E-04 | 1.29E-03 |
| MRC2     | -0.0191 | 7.14E-01 | 8.05E-01 |
| MRE11A   | 0.2375  | 3.72E-06 | 3.60E-05 |
| MREG     | 0.0910  | 8.00E-02 | 1.56E-01 |
| MRFAP1L1 | -0.0280 | 5.90E-01 | 7.05E-01 |
| MRFAP1   | -0.1419 | 6.17E-03 | 1.96E-02 |
| MRGPRD   | 0.0241  | 6.44E-01 | 7.49E-01 |
| MRGPRE   | -0.0167 | 7.49E-01 | 8.31E-01 |
| MRGPRF   | -0.1265 | 1.48E-02 | 4.02E-02 |
| MRGPRX1  | 0.0181  | 7.29E-01 | 8.16E-01 |
| MRGPRX2  | 0.0408  | 4.33E-01 | 5.65E-01 |
| MRGPRX3  | 0.0530  | 3.09E-01 | 4.38E-01 |
| MRGPRX4  | 0.1491  | 3.99E-03 | 1.37E-02 |
| MRI1     | -0.0026 | 9.60E-01 | 9.75E-01 |
| MRM1     | -0.0540 | 2.99E-01 | 4.29E-01 |
| MRO      | -0.1637 | 1.55E-03 | 6.23E-03 |
| MRP63    | -0.0774 | 1.37E-01 | 2.36E-01 |
| MRPL10   | 0.1251  | 1.59E-02 | 4.26E-02 |
| MRPL11   | 0.0861  | 9.77E-02 | 1.83E-01 |
| MRPL12   | -0.0542 | 2.98E-01 | 4.27E-01 |
| MRPL13   | 0.0011  | 9.84E-01 | 9.90E-01 |
| MRPL14   | 0.0440  | 3.99E-01 | 5.31E-01 |
| MRPL15   | -0.2138 | 3.28E-05 | 2.36E-04 |
| MRPL16   | -0.2755 | 6.89E-08 | 1.04E-06 |
| MRPL17   | 0.1421  | 6.12E-03 | 1.95E-02 |
| MRPL18   | 0.2338  | 5.36E-06 | 4.91E-05 |
| MRPL19   | -0.3048 | 2.04E-09 | 4.51E-08 |
| MRPL1    | -0.1202 | 2.06E-02 | 5.25E-02 |
| MRPL20   | -0.0163 | 7.54E-01 | 8.35E-01 |
| MRPL21   | -0.0041 | 9.38E-01 | 9.61E-01 |
| MRPL22   | 0.0135  | 7.96E-01 | 8.65E-01 |
| MRPL23   | 0.0534  | 3.05E-01 | 4.34E-01 |
| MRPL24   | 0.1964  | 1.41E-04 | 8.17E-04 |
| MRPL27   | 0.0482  | 3.55E-01 | 4.87E-01 |

|          |         |          |          |
|----------|---------|----------|----------|
| MRPL28   | -0.0620 | 2.33E-01 | 3.56E-01 |
| MRPL2    | -0.0481 | 3.56E-01 | 4.88E-01 |
| MRPL30   | -0.0040 | 9.39E-01 | 9.62E-01 |
| MRPL32   | -0.1844 | 3.56E-04 | 1.80E-03 |
| MRPL33   | 0.1134  | 2.90E-02 | 6.95E-02 |
| MRPL34   | -0.2920 | 9.97E-09 | 1.85E-07 |
| MRPL35   | -0.2038 | 7.68E-05 | 4.88E-04 |
| MRPL36   | -0.0092 | 8.59E-01 | 9.09E-01 |
| MRPL37   | -0.0674 | 1.95E-01 | 3.11E-01 |
| MRPL38   | 0.0320  | 5.39E-01 | 6.61E-01 |
| MRPL39   | -0.0833 | 1.09E-01 | 1.99E-01 |
| MRPL3    | -0.0145 | 7.81E-01 | 8.55E-01 |
| MRPL40   | -0.1886 | 2.59E-04 | 1.37E-03 |
| MRPL41   | -0.1602 | 1.97E-03 | 7.61E-03 |
| MRPL42P5 | -0.0255 | 6.25E-01 | 7.33E-01 |
| MRPL42   | 0.0281  | 5.90E-01 | 7.05E-01 |
| MRPL43   | -0.0866 | 9.57E-02 | 1.80E-01 |
| MRPL44   | -0.2365 | 4.11E-06 | 3.93E-05 |
| MRPL45   | 0.1117  | 3.15E-02 | 7.43E-02 |
| MRPL46   | -0.2964 | 5.83E-09 | 1.15E-07 |
| MRPL47   | 0.1425  | 5.96E-03 | 1.90E-02 |
| MRPL48   | 0.1760  | 6.63E-04 | 3.02E-03 |
| MRPL49   | -0.0387 | 4.57E-01 | 5.88E-01 |
| MRPL4    | -0.0769 | 1.39E-01 | 2.40E-01 |
| MRPL50   | 0.2343  | 5.08E-06 | 4.70E-05 |
| MRPL51   | 0.0643  | 2.17E-01 | 3.37E-01 |
| MRPL52   | 0.0536  | 3.03E-01 | 4.33E-01 |
| MRPL53   | -0.0248 | 6.34E-01 | 7.41E-01 |
| MRPL54   | -0.1865 | 3.03E-04 | 1.58E-03 |
| MRPL55   | 0.1821  | 4.23E-04 | 2.07E-03 |
| MRPL9    | 0.5881  | 6.95E-36 | 1.15E-32 |
| MRPS10   | 0.0608  | 2.43E-01 | 3.67E-01 |
| MRPS11   | -0.1210 | 1.97E-02 | 5.08E-02 |
| MRPS12   | -0.0315 | 5.46E-01 | 6.66E-01 |
| MRPS14   | 0.3016  | 3.07E-09 | 6.46E-08 |
| MRPS15   | -0.0372 | 4.75E-01 | 6.04E-01 |
| MRPS16   | -0.0070 | 8.93E-01 | 9.32E-01 |
| MRPS17   | 0.0850  | 1.02E-01 | 1.89E-01 |
| MRPS18A  | -0.0050 | 9.23E-01 | 9.51E-01 |
| MRPS18B  | -0.1048 | 4.38E-02 | 9.68E-02 |
| MRPS18C  | -0.0484 | 3.53E-01 | 4.84E-01 |
| MRPS21   | 0.3329  | 4.75E-11 | 1.50E-09 |
| MRPS22   | -0.1995 | 1.09E-04 | 6.56E-04 |
| MRPS23   | 0.3396  | 1.82E-11 | 6.22E-10 |

|        |         |          |          |
|--------|---------|----------|----------|
| MRPS24 | -0.0433 | 4.06E-01 | 5.39E-01 |
| MRPS25 | -0.1651 | 1.41E-03 | 5.75E-03 |
| MRPS26 | -0.0170 | 7.44E-01 | 8.28E-01 |
| MRPS27 | -0.1037 | 4.59E-02 | 1.00E-01 |
| MRPS28 | -0.1235 | 1.73E-02 | 4.57E-02 |
| MRPS2  | -0.0720 | 1.67E-01 | 2.75E-01 |
| MRPS30 | -0.0304 | 5.59E-01 | 6.78E-01 |
| MRPS31 | -0.0768 | 1.40E-01 | 2.40E-01 |
| MRPS33 | -0.1808 | 4.67E-04 | 2.24E-03 |
| MRPS34 | -0.0185 | 7.23E-01 | 8.12E-01 |
| MRPS35 | -0.0274 | 5.98E-01 | 7.12E-01 |
| MRPS36 | -0.1212 | 1.95E-02 | 5.04E-02 |
| MRPS5  | -0.0234 | 6.53E-01 | 7.56E-01 |
| MRPS6  | 0.0140  | 7.89E-01 | 8.59E-01 |
| MRPS7  | 0.0233  | 6.54E-01 | 7.57E-01 |
| MRPS9  | 0.0075  | 8.85E-01 | 9.26E-01 |
| MRRF   | 0.1011  | 5.17E-02 | 1.10E-01 |
| MRS2P2 | 0.0824  | 1.13E-01 | 2.05E-01 |
| MRS2   | 0.1266  | 1.47E-02 | 4.00E-02 |
| MRTO4  | 0.1250  | 1.60E-02 | 4.28E-02 |
| MRVI1  | -0.1679 | 1.17E-03 | 4.91E-03 |
| MS4A10 | 0.0181  | 7.28E-01 | 8.15E-01 |
| MS4A12 | 0.0578  | 2.67E-01 | 3.95E-01 |
| MS4A13 | 0.1402  | 6.83E-03 | 2.13E-02 |
| MS4A14 | 0.0268  | 6.06E-01 | 7.19E-01 |
| MS4A15 | 0.1573  | 2.38E-03 | 8.90E-03 |
| MS4A1  | 0.0145  | 7.81E-01 | 8.54E-01 |
| MS4A2  | -0.1388 | 7.41E-03 | 2.28E-02 |
| MS4A3  | -0.0444 | 3.94E-01 | 5.27E-01 |
| MS4A4A | -0.1397 | 7.05E-03 | 2.19E-02 |
| MS4A6A | -0.1150 | 2.68E-02 | 6.52E-02 |
| MS4A6E | -0.1226 | 1.82E-02 | 4.75E-02 |
| MS4A7  | -0.1844 | 3.55E-04 | 1.80E-03 |
| MS4A8B | 0.1859  | 3.18E-04 | 1.64E-03 |
| MSC    | 0.0670  | 1.98E-01 | 3.14E-01 |
| MSGN1  | 0.0290  | 5.77E-01 | 6.94E-01 |
| MSH2   | 0.3996  | 1.17E-15 | 9.22E-14 |
| MSH3   | -0.2066 | 6.10E-05 | 4.00E-04 |
| MSH4   | 0.0472  | 3.65E-01 | 4.97E-01 |
| MSH5   | 0.3274  | 1.02E-10 | 2.97E-09 |
| MSH6   | 0.3114  | 8.71E-10 | 2.09E-08 |
| MSI1   | 0.1606  | 1.91E-03 | 7.42E-03 |
| MSI2   | 0.1739  | 7.68E-04 | 3.43E-03 |
| MSL1   | 0.2335  | 5.48E-06 | 5.00E-05 |

|        |         |          |          |
|--------|---------|----------|----------|
| MSL2   | 0.1842  | 3.61E-04 | 1.82E-03 |
| MSL3L2 | 0.1561  | 2.57E-03 | 9.47E-03 |
| MSL3   | 0.0278  | 5.94E-01 | 7.08E-01 |
| MSLNL  | 0.0804  | 1.22E-01 | 2.17E-01 |
| MSLN   | 0.0107  | 8.37E-01 | 8.93E-01 |
| MSMB   | 0.0669  | 1.99E-01 | 3.15E-01 |
| MSMP   | 0.0879  | 9.08E-02 | 1.72E-01 |
| MSN    | -0.0641 | 2.18E-01 | 3.38E-01 |
| MSR1   | -0.0468 | 3.68E-01 | 5.01E-01 |
| MSRA   | -0.2757 | 6.75E-08 | 1.02E-06 |
| MSRB2  | -0.0763 | 1.42E-01 | 2.43E-01 |
| MSRB3  | -0.0471 | 3.65E-01 | 4.98E-01 |
| MST1P2 | -0.1081 | 3.73E-02 | 8.54E-02 |
| MST1P9 | -0.0007 | 9.89E-01 | 9.93E-01 |
| MST1R  | 0.1226  | 1.82E-02 | 4.75E-02 |
| MST1   | -0.2088 | 5.07E-05 | 3.43E-04 |
| MST4   | 0.2249  | 1.22E-05 | 1.00E-04 |
| MSTN   | -0.0552 | 2.89E-01 | 4.18E-01 |
| MSTO1  | 0.4360  | 1.21E-18 | 2.13E-16 |
| MSTO2P | 0.4100  | 1.79E-16 | 1.74E-14 |
| MSX1   | -0.0164 | 7.53E-01 | 8.34E-01 |
| MSX2P1 | 0.0252  | 6.29E-01 | 7.37E-01 |
| MSX2   | 0.0073  | 8.89E-01 | 9.29E-01 |
| MT1A   | -0.2221 | 1.58E-05 | 1.25E-04 |
| MT1B   | -0.0284 | 5.85E-01 | 7.01E-01 |
| MT1DP  | -0.1508 | 3.60E-03 | 1.26E-02 |
| MT1E   | -0.2358 | 4.41E-06 | 4.18E-05 |
| MT1F   | -0.2131 | 3.51E-05 | 2.51E-04 |
| MT1G   | -0.2333 | 5.59E-06 | 5.09E-05 |
| MT1H   | -0.1266 | 1.47E-02 | 4.00E-02 |
| MT1IP  | -0.0652 | 2.10E-01 | 3.29E-01 |
| MT1L   | -0.0946 | 6.89E-02 | 1.39E-01 |
| MT1M   | -0.2137 | 3.32E-05 | 2.38E-04 |
| MT1X   | -0.3100 | 1.06E-09 | 2.48E-08 |
| MT2A   | -0.2972 | 5.27E-09 | 1.05E-07 |
| MT3    | -0.0409 | 4.32E-01 | 5.64E-01 |
| MT4    | -0.0278 | 5.94E-01 | 7.08E-01 |
| MTA1   | 0.1083  | 3.71E-02 | 8.49E-02 |
| MTA2   | 0.1145  | 2.75E-02 | 6.65E-02 |
| MTA3   | 0.3382  | 2.23E-11 | 7.49E-10 |
| MTAP   | 0.2201  | 1.89E-05 | 1.47E-04 |
| MTBP   | 0.3619  | 6.41E-13 | 2.96E-11 |
| MTCH1  | 0.1099  | 3.43E-02 | 7.97E-02 |
| MTCH2  | -0.2952 | 6.80E-09 | 1.31E-07 |

|         |         |          |          |
|---------|---------|----------|----------|
| MTCP1NB | 0.0406  | 4.36E-01 | 5.68E-01 |
| MTCP1   | 0.2027  | 8.45E-05 | 5.30E-04 |
| MTDH    | -0.0391 | 4.53E-01 | 5.84E-01 |
| MTERFD1 | 0.0791  | 1.28E-01 | 2.25E-01 |
| MTERFD2 | 0.0866  | 9.57E-02 | 1.80E-01 |
| MTERFD3 | 0.1957  | 1.49E-04 | 8.57E-04 |
| MTERF   | 0.0042  | 9.35E-01 | 9.59E-01 |
| MTF1    | 0.0700  | 1.79E-01 | 2.90E-01 |
| MTF2    | 0.3016  | 3.07E-09 | 6.45E-08 |
| MTFMT   | -0.2417 | 2.47E-06 | 2.51E-05 |
| MTFR1   | -0.1150 | 2.67E-02 | 6.50E-02 |
| MTG1    | 0.0417  | 4.24E-01 | 5.56E-01 |
| MTHFD1L | 0.2015  | 9.30E-05 | 5.73E-04 |
| MTHFD1  | -0.3156 | 5.04E-10 | 1.27E-08 |
| MTHFD2L | 0.0153  | 7.68E-01 | 8.44E-01 |
| MTHFD2  | 0.0012  | 9.82E-01 | 9.89E-01 |
| MTHFR   | 0.0242  | 6.42E-01 | 7.47E-01 |
| MTHFSD  | -0.0135 | 7.95E-01 | 8.64E-01 |
| MTHFS   | -0.1990 | 1.14E-04 | 6.82E-04 |
| MTIF2   | -0.0985 | 5.82E-02 | 1.21E-01 |
| MTIF3   | -0.0619 | 2.34E-01 | 3.57E-01 |
| MTL5    | 0.2845  | 2.45E-08 | 4.12E-07 |
| MTM1    | -0.0504 | 3.33E-01 | 4.64E-01 |
| MTMR10  | -0.1573 | 2.38E-03 | 8.88E-03 |
| MTMR11  | 0.1479  | 4.32E-03 | 1.46E-02 |
| MTMR12  | 0.0285  | 5.84E-01 | 6.99E-01 |
| MTMR14  | -0.0331 | 5.25E-01 | 6.48E-01 |
| MTMR15  | -0.0041 | 9.38E-01 | 9.61E-01 |
| MTMR1   | 0.1623  | 1.71E-03 | 6.76E-03 |
| MTMR2   | 0.2166  | 2.59E-05 | 1.93E-04 |
| MTMR3   | 0.1175  | 2.36E-02 | 5.87E-02 |
| MTMR4   | -0.0155 | 7.66E-01 | 8.42E-01 |
| MTMR6   | -0.1148 | 2.70E-02 | 6.56E-02 |
| MTMR7   | 0.1509  | 3.58E-03 | 1.25E-02 |
| MTMR8   | 0.1658  | 1.35E-03 | 5.52E-03 |
| MTMR9L  | -0.0432 | 4.06E-01 | 5.39E-01 |
| MTMR9   | -0.0141 | 7.87E-01 | 8.59E-01 |
| MTNR1A  | 0.0566  | 2.77E-01 | 4.05E-01 |
| MTNR1B  | 0.1679  | 1.17E-03 | 4.91E-03 |
| MTO1    | 0.0250  | 6.31E-01 | 7.38E-01 |
| MTOR    | -0.1371 | 8.16E-03 | 2.47E-02 |
| MTP18   | -0.0190 | 7.16E-01 | 8.06E-01 |
| MTPAP   | 0.1214  | 1.93E-02 | 4.99E-02 |
| MTRF1L  | 0.0657  | 2.07E-01 | 3.25E-01 |

|        |         |          |          |
|--------|---------|----------|----------|
| MTRF1  | 0.0089  | 8.65E-01 | 9.13E-01 |
| MTRR   | 0.0111  | 8.31E-01 | 8.89E-01 |
| MTR    | 0.1040  | 4.54E-02 | 9.97E-02 |
| MTSS1L | -0.0641 | 2.18E-01 | 3.38E-01 |
| MTSS1  | -0.1273 | 1.41E-02 | 3.88E-02 |
| MTTP   | -0.1570 | 2.42E-03 | 9.03E-03 |
| MTUS1  | -0.0940 | 7.06E-02 | 1.41E-01 |
| MTUS2  | -0.0830 | 1.10E-01 | 2.01E-01 |
| MTVR2  | 0.0916  | 7.81E-02 | 1.53E-01 |
| MTX1   | 0.2874  | 1.74E-08 | 3.06E-07 |
| MTX2   | 0.0771  | 1.38E-01 | 2.38E-01 |
| MTX3   | 0.1408  | 6.60E-03 | 2.08E-02 |
| MUC12  | 0.0540  | 3.00E-01 | 4.29E-01 |
| MUC13  | 0.1322  | 1.08E-02 | 3.10E-02 |
| MUC15  | 0.1396  | 7.10E-03 | 2.20E-02 |
| MUC16  | -0.0199 | 7.02E-01 | 7.95E-01 |
| MUC17  | 0.0366  | 4.82E-01 | 6.10E-01 |
| MUC1   | 0.2100  | 4.55E-05 | 3.12E-04 |
| MUC20  | 0.0000  | 9.99E-01 | 1.00E+00 |
| MUC21  | -0.0049 | 9.25E-01 | 9.52E-01 |
| MUC2   | 0.0269  | 6.05E-01 | 7.17E-01 |
| MUC4   | 0.0211  | 6.86E-01 | 7.82E-01 |
| MUC5B  | 0.0768  | 1.40E-01 | 2.40E-01 |
| MUC6   | 0.0331  | 5.25E-01 | 6.48E-01 |
| MUC7   | 0.0152  | 7.71E-01 | 8.46E-01 |
| MUCL1  | -0.1053 | 4.26E-02 | 9.47E-02 |
| MUDENG | -0.2307 | 7.16E-06 | 6.28E-05 |
| MUL1   | -0.2444 | 1.91E-06 | 2.01E-05 |
| MUM1L1 | 0.0416  | 4.25E-01 | 5.57E-01 |
| MUM1   | 0.0864  | 9.67E-02 | 1.81E-01 |
| MURC   | 0.0312  | 5.49E-01 | 6.69E-01 |
| MUS81  | 0.2237  | 1.37E-05 | 1.10E-04 |
| MUSK   | 0.0486  | 3.50E-01 | 4.83E-01 |
| MUSTN1 | -0.0127 | 8.08E-01 | 8.73E-01 |
| MUTED  | 0.0864  | 9.64E-02 | 1.81E-01 |
| MUTYH  | 0.2366  | 4.07E-06 | 3.90E-05 |
| MUT    | -0.2094 | 4.82E-05 | 3.28E-04 |
| MVD    | -0.0513 | 3.25E-01 | 4.55E-01 |
| MVK    | -0.1847 | 3.49E-04 | 1.77E-03 |
| MVP    | -0.0609 | 2.42E-01 | 3.66E-01 |
| MX1    | 0.0308  | 5.54E-01 | 6.73E-01 |
| MX2    | 0.0775  | 1.36E-01 | 2.36E-01 |
| MXD1   | 0.1815  | 4.43E-04 | 2.15E-03 |
| MXD3   | 0.2941  | 7.72E-09 | 1.47E-07 |

|         |         |          |          |
|---------|---------|----------|----------|
| MXD4    | -0.1036 | 4.61E-02 | 1.01E-01 |
| MXI1    | -0.3249 | 1.44E-10 | 4.11E-09 |
| MXRA5   | -0.0920 | 7.67E-02 | 1.51E-01 |
| MXRA7   | 0.0915  | 7.85E-02 | 1.53E-01 |
| MXRA8   | -0.0539 | 3.01E-01 | 4.30E-01 |
| MYADML2 | 0.1817  | 4.35E-04 | 2.11E-03 |
| MYADML  | 0.0608  | 2.43E-01 | 3.67E-01 |
| MYADM   | 0.0560  | 2.82E-01 | 4.11E-01 |
| MYBBP1A | 0.0975  | 6.06E-02 | 1.25E-01 |
| MYBL1   | 0.2865  | 1.94E-08 | 3.37E-07 |
| MYBL2   | 0.4067  | 3.27E-16 | 2.93E-14 |
| MYBPC1  | 0.0277  | 5.95E-01 | 7.09E-01 |
| MYBPC2  | 0.1056  | 4.21E-02 | 9.38E-02 |
| MYBPC3  | 0.1483  | 4.19E-03 | 1.43E-02 |
| MYBPHL  | 0.1347  | 9.38E-03 | 2.78E-02 |
| MYBPH   | 0.0814  | 1.18E-01 | 2.11E-01 |
| MYB     | 0.2574  | 5.00E-07 | 6.12E-06 |
| MYCBP2  | -0.1046 | 4.41E-02 | 9.74E-02 |
| MYCBPAP | 0.3595  | 9.25E-13 | 4.17E-11 |
| MYCBP   | 0.1351  | 9.19E-03 | 2.73E-02 |
| MYCL1   | -0.1175 | 2.36E-02 | 5.87E-02 |
| MYCNOS  | 0.0719  | 1.67E-01 | 2.75E-01 |
| MYCN    | 0.0864  | 9.64E-02 | 1.81E-01 |
| MYCT1   | -0.2295 | 7.96E-06 | 6.86E-05 |
| MYC     | -0.0606 | 2.44E-01 | 3.68E-01 |
| MYD88   | -0.2605 | 3.61E-07 | 4.60E-06 |
| MYEF2   | 0.1783  | 5.58E-04 | 2.61E-03 |
| MYEOV2  | 0.0669  | 1.99E-01 | 3.15E-01 |
| MYEOV   | -0.0436 | 4.03E-01 | 5.36E-01 |
| MYF6    | 0.0899  | 8.37E-02 | 1.61E-01 |
| MYH10   | -0.0723 | 1.65E-01 | 2.73E-01 |
| MYH11   | -0.1514 | 3.46E-03 | 1.22E-02 |
| MYH13   | 0.0222  | 6.70E-01 | 7.70E-01 |
| MYH14   | -0.0305 | 5.58E-01 | 6.76E-01 |
| MYH15   | 0.0971  | 6.18E-02 | 1.27E-01 |
| MYH16   | 0.0800  | 1.24E-01 | 2.19E-01 |
| MYH1    | 0.0373  | 4.74E-01 | 6.03E-01 |
| MYH2    | 0.0027  | 9.59E-01 | 9.74E-01 |
| MYH3    | -0.0329 | 5.28E-01 | 6.51E-01 |
| MYH4    | 0.0648  | 2.13E-01 | 3.33E-01 |
| MYH6    | 0.0755  | 1.47E-01 | 2.50E-01 |
| MYH7B   | 0.0068  | 8.95E-01 | 9.33E-01 |
| MYH7    | 0.0377  | 4.69E-01 | 5.99E-01 |
| MYH8    | 0.0411  | 4.29E-01 | 5.62E-01 |



|        |         |          |          |
|--------|---------|----------|----------|
| MYH9   | -0.0097 | 8.52E-01 | 9.04E-01 |
| MYL10  | 0.0134  | 7.97E-01 | 8.66E-01 |
| MYL12A | -0.1053 | 4.26E-02 | 9.47E-02 |
| MYL12B | -0.1046 | 4.40E-02 | 9.72E-02 |
| MYL1   | -0.0561 | 2.81E-01 | 4.09E-01 |
| MYL2   | -0.0339 | 5.15E-01 | 6.39E-01 |
| MYL3   | 0.0104  | 8.42E-01 | 8.96E-01 |
| MYL4   | 0.0132  | 8.00E-01 | 8.68E-01 |
| MYL5   | -0.0995 | 5.56E-02 | 1.17E-01 |
| MYL6B  | 0.0963  | 6.39E-02 | 1.30E-01 |
| MYL6   | -0.0235 | 6.52E-01 | 7.56E-01 |
| MYL7   | 0.0063  | 9.03E-01 | 9.39E-01 |
| MYL9   | -0.0935 | 7.20E-02 | 1.44E-01 |
| MYLIP  | 0.0613  | 2.39E-01 | 3.63E-01 |
| MYLK2  | 0.2177  | 2.33E-05 | 1.77E-04 |
| MYLK3  | 0.0592  | 2.56E-01 | 3.81E-01 |
| MYLK4  | 0.0474  | 3.63E-01 | 4.95E-01 |
| MYLK   | -0.2538 | 7.27E-07 | 8.53E-06 |
| MYLPF  | -0.0520 | 3.18E-01 | 4.48E-01 |
| MYNN   | 0.1859  | 3.18E-04 | 1.64E-03 |
| MYO10  | -0.0932 | 7.29E-02 | 1.45E-01 |
| MYO15A | 0.1106  | 3.32E-02 | 7.77E-02 |
| MYO15B | 0.0319  | 5.40E-01 | 6.61E-01 |
| MYO16  | -0.1409 | 6.55E-03 | 2.06E-02 |
| MYO18A | -0.0749 | 1.50E-01 | 2.54E-01 |
| MYO18B | 0.0419  | 4.20E-01 | 5.53E-01 |
| MYO19  | 0.3672  | 2.77E-13 | 1.37E-11 |
| MYO1A  | 0.1765  | 6.39E-04 | 2.93E-03 |
| MYO1B  | -0.2563 | 5.63E-07 | 6.77E-06 |
| MYO1C  | -0.0198 | 7.04E-01 | 7.97E-01 |
| MYO1D  | -0.0425 | 4.15E-01 | 5.47E-01 |
| MYO1E  | -0.0831 | 1.10E-01 | 2.00E-01 |
| MYO1F  | -0.0932 | 7.29E-02 | 1.45E-01 |
| MYO1G  | -0.0205 | 6.94E-01 | 7.89E-01 |
| MYO1H  | 0.1840  | 3.68E-04 | 1.85E-03 |
| MYO3A  | 0.1351  | 9.18E-03 | 2.73E-02 |
| MYO3B  | -0.0488 | 3.48E-01 | 4.80E-01 |
| MYO5A  | -0.1134 | 2.90E-02 | 6.95E-02 |
| MYO5B  | -0.1648 | 1.44E-03 | 5.85E-03 |
| MYO5C  | 0.2262  | 1.08E-05 | 9.02E-05 |
| MYO6   | 0.1478  | 4.33E-03 | 1.47E-02 |
| MYO7A  | -0.0586 | 2.60E-01 | 3.87E-01 |
| MYO7B  | -0.0564 | 2.79E-01 | 4.07E-01 |
| MYO9A  | -0.1140 | 2.82E-02 | 6.80E-02 |

|         |         |          |          |
|---------|---------|----------|----------|
| MYO9B   | 0.1367  | 8.39E-03 | 2.53E-02 |
| MYOCD   | -0.1640 | 1.52E-03 | 6.13E-03 |
| MYOC    | -0.0867 | 9.54E-02 | 1.79E-01 |
| MYOD1   | 0.0873  | 9.30E-02 | 1.76E-01 |
| MYOF    | -0.1075 | 3.85E-02 | 8.74E-02 |
| MYOG    | 0.0950  | 6.76E-02 | 1.36E-01 |
| MYOM1   | 0.0111  | 8.32E-01 | 8.90E-01 |
| MYOM2   | -0.1957 | 1.48E-04 | 8.56E-04 |
| MYOM3   | 0.0216  | 6.78E-01 | 7.76E-01 |
| MYOT    | -0.0984 | 5.82E-02 | 1.21E-01 |
| MYOZ1   | -0.0449 | 3.88E-01 | 5.21E-01 |
| MYOZ2   | -0.0995 | 5.55E-02 | 1.17E-01 |
| MYOZ3   | 0.0080  | 8.79E-01 | 9.22E-01 |
| MYPN    | 0.1148  | 2.71E-02 | 6.57E-02 |
| MYPOP   | 0.1615  | 1.81E-03 | 7.08E-03 |
| MYRIP   | -0.2812 | 3.59E-08 | 5.79E-07 |
| MYSM1   | -0.0171 | 7.42E-01 | 8.26E-01 |
| MYST1   | 0.0028  | 9.57E-01 | 9.73E-01 |
| MYST2   | 0.2762  | 6.42E-08 | 9.74E-07 |
| MYST3   | 0.0550  | 2.91E-01 | 4.20E-01 |
| MYST4   | -0.0392 | 4.51E-01 | 5.82E-01 |
| MYT1L   | 0.1337  | 9.91E-03 | 2.90E-02 |
| MYT1    | 0.0166  | 7.50E-01 | 8.32E-01 |
| MZF1    | 0.0897  | 8.44E-02 | 1.62E-01 |
| N4BP1   | -0.1381 | 7.74E-03 | 2.37E-02 |
| N4BP2L1 | -0.1834 | 3.86E-04 | 1.92E-03 |
| N4BP2L2 | 0.1301  | 1.21E-02 | 3.42E-02 |
| N4BP2   | -0.0724 | 1.64E-01 | 2.72E-01 |
| N4BP3   | 0.1792  | 5.23E-04 | 2.47E-03 |
| N6AMT1  | -0.0002 | 9.97E-01 | 9.98E-01 |
| N6AMT2  | -0.0227 | 6.63E-01 | 7.64E-01 |
| NAA10   | 0.1726  | 8.41E-04 | 3.70E-03 |
| NAA11   | 0.1279  | 1.37E-02 | 3.78E-02 |
| NAA15   | 0.0386  | 4.59E-01 | 5.89E-01 |
| NAA16   | 0.1193  | 2.16E-02 | 5.46E-02 |
| NAA20   | 0.0584  | 2.62E-01 | 3.89E-01 |
| NAA25   | 0.2436  | 2.05E-06 | 2.13E-05 |
| NAA30   | -0.1650 | 1.42E-03 | 5.78E-03 |
| NAA35   | 0.1578  | 2.31E-03 | 8.67E-03 |
| NAA38   | 0.0944  | 6.95E-02 | 1.40E-01 |
| NAA40   | 0.2787  | 4.79E-08 | 7.51E-07 |
| NAA50   | 0.0978  | 6.00E-02 | 1.24E-01 |
| NAAA    | -0.1855 | 3.28E-04 | 1.68E-03 |
| NAALAD2 | 0.1432  | 5.72E-03 | 1.84E-02 |

|          |         |          |          |
|----------|---------|----------|----------|
| NAALADL1 | 0.1705  | 9.74E-04 | 4.21E-03 |
| NAALADL2 | -0.2764 | 6.28E-08 | 9.56E-07 |
| NAB1     | 0.1163  | 2.50E-02 | 6.16E-02 |
| NAB2     | -0.0115 | 8.26E-01 | 8.86E-01 |
| NACA2    | 0.1700  | 1.01E-03 | 4.33E-03 |
| NACAD    | -0.1268 | 1.46E-02 | 3.98E-02 |
| NACAP1   | 0.1053  | 4.28E-02 | 9.50E-02 |
| NACA     | 0.1319  | 1.10E-02 | 3.14E-02 |
| NACC1    | 0.0504  | 3.33E-01 | 4.64E-01 |
| NACC2    | -0.0086 | 8.69E-01 | 9.16E-01 |
| NADK     | -0.1443 | 5.36E-03 | 1.75E-02 |
| NADSYN1  | -0.0459 | 3.78E-01 | 5.11E-01 |
| NAE1     | 0.0822  | 1.14E-01 | 2.06E-01 |
| NAF1     | -0.0771 | 1.38E-01 | 2.38E-01 |
| NAGA     | -0.1153 | 2.64E-02 | 6.45E-02 |
| NAGK     | 0.0372  | 4.75E-01 | 6.04E-01 |
| NAGLU    | -0.3345 | 3.78E-11 | 1.22E-09 |
| NAGPA    | 0.0059  | 9.10E-01 | 9.43E-01 |
| NAGS     | -0.1109 | 3.27E-02 | 7.67E-02 |
| NAIF1    | 0.1617  | 1.78E-03 | 6.99E-03 |
| NAIP     | 0.1039  | 4.55E-02 | 9.99E-02 |
| NALCN    | 0.0050  | 9.23E-01 | 9.51E-01 |
| NAMPT    | -0.2101 | 4.53E-05 | 3.11E-04 |
| NANOG    | 0.1281  | 1.35E-02 | 3.75E-02 |
| NANOS1   | 0.1499  | 3.81E-03 | 1.32E-02 |
| NANOS2   | 0.0377  | 4.69E-01 | 5.99E-01 |
| NANOS3   | 0.0768  | 1.40E-01 | 2.40E-01 |
| NANP     | 0.0484  | 3.52E-01 | 4.84E-01 |
| NANS     | 0.1014  | 5.10E-02 | 1.09E-01 |
| NAP1L1   | 0.2655  | 2.11E-07 | 2.84E-06 |
| NAP1L2   | 0.0687  | 1.87E-01 | 3.00E-01 |
| NAP1L3   | 0.0202  | 6.98E-01 | 7.92E-01 |
| NAP1L4   | 0.1371  | 8.17E-03 | 2.48E-02 |
| NAP1L5   | -0.2008 | 9.87E-05 | 6.03E-04 |
| NAP1L6   | 0.1331  | 1.03E-02 | 2.99E-02 |
| NAPA     | -0.1750 | 7.11E-04 | 3.21E-03 |
| NAPB     | 0.0159  | 7.61E-01 | 8.39E-01 |
| NAPEPLD  | -0.0814 | 1.18E-01 | 2.11E-01 |
| NAPG     | 0.0486  | 3.51E-01 | 4.83E-01 |
| NAPRT1   | -0.0741 | 1.54E-01 | 2.59E-01 |
| NAPSA    | 0.0802  | 1.23E-01 | 2.18E-01 |
| NAPSB    | -0.0280 | 5.91E-01 | 7.06E-01 |
| NARFL    | 0.0169  | 7.46E-01 | 8.29E-01 |
| NARF     | 0.2008  | 9.84E-05 | 6.02E-04 |

|           |         |          |          |
|-----------|---------|----------|----------|
| NARG2     | 0.1399  | 6.96E-03 | 2.17E-02 |
| NARS2     | -0.1201 | 2.07E-02 | 5.28E-02 |
| NARS      | -0.0163 | 7.55E-01 | 8.35E-01 |
| NASP      | 0.3694  | 1.95E-13 | 9.88E-12 |
| NAT10     | 0.2283  | 8.95E-06 | 7.62E-05 |
| NAT14     | 0.0466  | 3.71E-01 | 5.04E-01 |
| NAT15     | -0.0014 | 9.78E-01 | 9.86E-01 |
| NAT1      | -0.1283 | 1.34E-02 | 3.72E-02 |
| NAT2      | -0.2780 | 5.19E-08 | 8.04E-07 |
| NAT6      | -0.0727 | 1.62E-01 | 2.69E-01 |
| NAT8B     | 0.0129  | 8.05E-01 | 8.71E-01 |
| NAT8L     | 0.0216  | 6.78E-01 | 7.76E-01 |
| NAT8      | -0.1457 | 4.92E-03 | 1.63E-02 |
| NAT9      | 0.2869  | 1.85E-08 | 3.24E-07 |
| NAV1      | -0.0660 | 2.04E-01 | 3.22E-01 |
| NAV2      | 0.0362  | 4.87E-01 | 6.15E-01 |
| NAV3      | -0.0413 | 4.28E-01 | 5.60E-01 |
| NBAS      | -0.0551 | 2.90E-01 | 4.19E-01 |
| NBEAL1    | -0.0643 | 2.17E-01 | 3.37E-01 |
| NBEAL2    | 0.2066  | 6.10E-05 | 4.01E-04 |
| NBEA      | 0.0395  | 4.48E-01 | 5.79E-01 |
| NBL1      | -0.0741 | 1.54E-01 | 2.59E-01 |
| NBLA00301 | -0.1511 | 3.52E-03 | 1.24E-02 |
| NBN       | -0.1428 | 5.87E-03 | 1.88E-02 |
| NBPF10    | 0.0928  | 7.41E-02 | 1.47E-01 |
| NBPF14    | 0.1269  | 1.45E-02 | 3.96E-02 |
| NBPF15    | 0.2093  | 4.83E-05 | 3.29E-04 |
| NBPF16    | 0.1245  | 1.64E-02 | 4.38E-02 |
| NBPF1     | 0.0269  | 6.05E-01 | 7.17E-01 |
| NBPF22P   | 0.0536  | 3.04E-01 | 4.33E-01 |
| NBPF3     | -0.0111 | 8.32E-01 | 8.90E-01 |
| NBPF4     | 0.1437  | 5.56E-03 | 1.80E-02 |
| NBPF6     | 0.1763  | 6.45E-04 | 2.95E-03 |
| NBPF7     | 0.2064  | 6.21E-05 | 4.07E-04 |
| NBPF9     | 0.0970  | 6.21E-02 | 1.27E-01 |
| NBR1      | -0.0885 | 8.88E-02 | 1.69E-01 |
| NBR2      | 0.0584  | 2.62E-01 | 3.88E-01 |
| NCALD     | -0.0203 | 6.97E-01 | 7.91E-01 |
| NCAM1     | 0.0113  | 8.29E-01 | 8.88E-01 |
| NCAM2     | -0.0941 | 7.03E-02 | 1.41E-01 |
| NCAN      | -0.0796 | 1.26E-01 | 2.22E-01 |
| NCAPD2    | 0.3383  | 2.20E-11 | 7.41E-10 |
| NCAPD3    | 0.2225  | 1.52E-05 | 1.21E-04 |
| NCAPG2    | 0.3113  | 8.84E-10 | 2.12E-08 |

|            |         |          |          |
|------------|---------|----------|----------|
| NCAPG      | 0.4358  | 1.26E-18 | 2.19E-16 |
| NCAPH2     | 0.3550  | 1.84E-12 | 7.72E-11 |
| NCAPH      | 0.4109  | 1.51E-16 | 1.49E-14 |
| NCBP1      | 0.2216  | 1.65E-05 | 1.31E-04 |
| NCBP2      | 0.2818  | 3.36E-08 | 5.47E-07 |
| NCCRP1     | 0.1469  | 4.58E-03 | 1.53E-02 |
| NCDN       | 0.1047  | 4.39E-02 | 9.70E-02 |
| NCEH1      | 0.1113  | 3.20E-02 | 7.53E-02 |
| NCF1B      | -0.0156 | 7.64E-01 | 8.41E-01 |
| NCF1C      | -0.0476 | 3.61E-01 | 4.93E-01 |
| NCF1       | -0.0013 | 9.80E-01 | 9.87E-01 |
| NCF2       | 0.0689  | 1.86E-01 | 2.99E-01 |
| NCF4       | -0.0158 | 7.62E-01 | 8.40E-01 |
| NCK1       | -0.0278 | 5.93E-01 | 7.08E-01 |
| NCK2       | 0.1416  | 6.28E-03 | 1.99E-02 |
| NCKAP1L    | -0.0704 | 1.76E-01 | 2.86E-01 |
| NCKAP1     | 0.0616  | 2.37E-01 | 3.61E-01 |
| NCKAP5L    | 0.0158  | 7.61E-01 | 8.39E-01 |
| NCKAP5     | -0.1912 | 2.12E-04 | 1.16E-03 |
| NCKIPSD    | 0.1301  | 1.21E-02 | 3.42E-02 |
| NCLN       | -0.0148 | 7.77E-01 | 8.51E-01 |
| NCL        | 0.1520  | 3.35E-03 | 1.18E-02 |
| NCOA1      | -0.0967 | 6.28E-02 | 1.29E-01 |
| NCOA2      | -0.0961 | 6.44E-02 | 1.31E-01 |
| NCOA3      | 0.0589  | 2.58E-01 | 3.84E-01 |
| NCOA4      | -0.2170 | 2.49E-05 | 1.87E-04 |
| NCOA5      | 0.4047  | 4.70E-16 | 4.07E-14 |
| NCOA6      | 0.1511  | 3.53E-03 | 1.24E-02 |
| NCOA7      | 0.0492  | 3.45E-01 | 4.77E-01 |
| NCOR1      | -0.0622 | 2.32E-01 | 3.55E-01 |
| NCOR2      | 0.1828  | 4.02E-04 | 1.99E-03 |
| NCR1       | -0.1187 | 2.22E-02 | 5.59E-02 |
| NCR2       | 0.0531  | 3.08E-01 | 4.37E-01 |
| NCR3       | -0.0381 | 4.64E-01 | 5.94E-01 |
| NCRNA00028 | -0.0213 | 6.82E-01 | 7.79E-01 |
| NCRNA00029 | 0.0512  | 3.26E-01 | 4.56E-01 |
| NCRNA00032 | 0.1617  | 1.78E-03 | 6.99E-03 |
| NCRNA00051 | 0.0457  | 3.81E-01 | 5.14E-01 |
| NCRNA00052 | -0.0408 | 4.33E-01 | 5.65E-01 |
| NCRNA00081 | 0.0283  | 5.86E-01 | 7.02E-01 |
| NCRNA00085 | 0.1321  | 1.09E-02 | 3.13E-02 |
| NCRNA00086 | -0.0065 | 9.01E-01 | 9.37E-01 |
| NCRNA00087 | 0.0424  | 4.15E-01 | 5.48E-01 |
| NCRNA00092 | 0.0983  | 5.86E-02 | 1.22E-01 |

|             |         |          |          |
|-------------|---------|----------|----------|
| NCRNA00093  | -0.2110 | 4.20E-05 | 2.92E-04 |
| NCRNA00094  | 0.1420  | 6.13E-03 | 1.95E-02 |
| NCRNA00095  | 0.1968  | 1.36E-04 | 7.92E-04 |
| NCRNA00099  | -0.0058 | 9.11E-01 | 9.44E-01 |
| NCRNA00105  | 0.1195  | 2.13E-02 | 5.40E-02 |
| NCRNA00107  | 0.2823  | 3.16E-08 | 5.18E-07 |
| NCRNA00110  | 0.1435  | 5.62E-03 | 1.81E-02 |
| NCRNA00112  | 0.0345  | 5.08E-01 | 6.32E-01 |
| NCRNA00113  | -0.0133 | 7.98E-01 | 8.66E-01 |
| NCRNA00114  | 0.2905  | 1.21E-08 | 2.20E-07 |
| NCRNA00115  | 0.0887  | 8.79E-02 | 1.68E-01 |
| NCRNA00116  | -0.0499 | 3.37E-01 | 4.69E-01 |
| NCRNA00119  | 0.0172  | 7.41E-01 | 8.25E-01 |
| NCRNA00120  | -0.0066 | 8.99E-01 | 9.36E-01 |
| NCRNA00152  | 0.1996  | 1.09E-04 | 6.53E-04 |
| NCRNA00157  | -0.0112 | 8.30E-01 | 8.89E-01 |
| NCRNA00158  | 0.0783  | 1.32E-01 | 2.30E-01 |
| NCRNA00159  | 0.0738  | 1.56E-01 | 2.61E-01 |
| NCRNA00160  | -0.0605 | 2.45E-01 | 3.70E-01 |
| NCRNA00161  | -0.0047 | 9.28E-01 | 9.54E-01 |
| NCRNA00162  | 0.1376  | 7.95E-03 | 2.42E-02 |
| NCRNA00164  | 0.1543  | 2.88E-03 | 1.05E-02 |
| NCRNA00167  | 0.1328  | 1.05E-02 | 3.03E-02 |
| NCRNA00169  | 0.0861  | 9.76E-02 | 1.83E-01 |
| NCRNA00171  | 0.1528  | 3.18E-03 | 1.13E-02 |
| NCRNA00173  | 0.1753  | 6.98E-04 | 3.16E-03 |
| NCRNA00174  | -0.0039 | 9.40E-01 | 9.63E-01 |
| NCRNA00175  | 0.1472  | 4.49E-03 | 1.51E-02 |
| NCRNA00176  | 0.0738  | 1.56E-01 | 2.61E-01 |
| NCRNA00181  | -0.2985 | 4.51E-09 | 9.13E-08 |
| NCRNA00182  | 0.0044  | 9.32E-01 | 9.58E-01 |
| NCRNA00183  | 0.1965  | 1.39E-04 | 8.09E-04 |
| NCRNA00185  | -0.0646 | 2.14E-01 | 3.34E-01 |
| NCRNA00188  | 0.1331  | 1.03E-02 | 2.99E-02 |
| NCRNA00189  | 0.0779  | 1.34E-01 | 2.33E-01 |
| NCRNA00200  | 0.1084  | 3.68E-02 | 8.44E-02 |
| NCRNA00201  | 0.3707  | 1.57E-13 | 8.11E-12 |
| NCRNA00202  | 0.2148  | 3.02E-05 | 2.20E-04 |
| NCRNA00203  | 0.1014  | 5.09E-02 | 1.09E-01 |
| NCRNA00204B | 0.1474  | 4.43E-03 | 1.49E-02 |
| NCRNA00207  | -0.0604 | 2.46E-01 | 3.70E-01 |
| NCRNA00219  | 0.0498  | 3.39E-01 | 4.71E-01 |
| NCRNA00230B | -0.1320 | 1.09E-02 | 3.14E-02 |
| NCRNA00235  | 0.1574  | 2.36E-03 | 8.84E-03 |

|          |         |          |          |
|----------|---------|----------|----------|
| NCS1     | 0.0977  | 6.00E-02 | 1.24E-01 |
| NCSTN    | 0.2976  | 5.07E-09 | 1.01E-07 |
| NDC80    | 0.4249  | 1.07E-17 | 1.43E-15 |
| NDE1     | 0.1844  | 3.57E-04 | 1.80E-03 |
| NDEL1    | -0.1191 | 2.18E-02 | 5.50E-02 |
| NDFIP1   | -0.2517 | 9.04E-07 | 1.04E-05 |
| NDFIP2   | -0.1823 | 4.16E-04 | 2.04E-03 |
| NDNL2    | 0.0431  | 4.07E-01 | 5.40E-01 |
| NDN      | 0.0465  | 3.72E-01 | 5.05E-01 |
| NDOR1    | 0.3248  | 1.46E-10 | 4.16E-09 |
| NDP      | 0.0362  | 4.86E-01 | 6.14E-01 |
| NDRG1    | 0.1820  | 4.28E-04 | 2.09E-03 |
| NDRG2    | -0.3380 | 2.28E-11 | 7.62E-10 |
| NDRG3    | 0.2633  | 2.66E-07 | 3.51E-06 |
| NDRG4    | -0.0789 | 1.29E-01 | 2.26E-01 |
| NDST1    | -0.0540 | 3.00E-01 | 4.29E-01 |
| NDST2    | 0.0536  | 3.03E-01 | 4.33E-01 |
| NDST3    | -0.1475 | 4.41E-03 | 1.49E-02 |
| NDST4    | 0.0306  | 5.57E-01 | 6.76E-01 |
| NDUFA10  | -0.1592 | 2.10E-03 | 8.03E-03 |
| NDUFA11  | -0.0630 | 2.26E-01 | 3.48E-01 |
| NDUFA12  | 0.0259  | 6.18E-01 | 7.28E-01 |
| NDUFA13  | -0.0485 | 3.52E-01 | 4.84E-01 |
| NDUFA1   | 0.0264  | 6.12E-01 | 7.23E-01 |
| NDUFA2   | -0.0262 | 6.15E-01 | 7.25E-01 |
| NDUFA3   | -0.0748 | 1.51E-01 | 2.55E-01 |
| NDUFA4L2 | 0.0907  | 8.12E-02 | 1.57E-01 |
| NDUFA4   | -0.1258 | 1.53E-02 | 4.14E-02 |
| NDUFA5   | -0.3105 | 9.86E-10 | 2.34E-08 |
| NDUFA6   | -0.0388 | 4.57E-01 | 5.87E-01 |
| NDUFA7   | -0.0736 | 1.57E-01 | 2.62E-01 |
| NDUFA8   | 0.0085  | 8.70E-01 | 9.16E-01 |
| NDUFA9   | -0.1160 | 2.55E-02 | 6.25E-02 |
| NDUFAB1  | -0.1231 | 1.77E-02 | 4.64E-02 |
| NDUFAF1  | -0.3710 | 1.50E-13 | 7.83E-12 |
| NDUFAF2  | 0.1338  | 9.89E-03 | 2.90E-02 |
| NDUFAF3  | -0.1102 | 3.39E-02 | 7.90E-02 |
| NDUFAF4  | 0.0259  | 6.19E-01 | 7.29E-01 |
| NDUFB10  | -0.0775 | 1.36E-01 | 2.36E-01 |
| NDUFB11  | 0.0354  | 4.97E-01 | 6.23E-01 |
| NDUFB1   | -0.1062 | 4.09E-02 | 9.17E-02 |
| NDUFB2   | -0.1452 | 5.08E-03 | 1.67E-02 |
| NDUFB3   | 0.0901  | 8.31E-02 | 1.60E-01 |
| NDUFB4   | 0.0455  | 3.82E-01 | 5.16E-01 |

|        |         |          |          |
|--------|---------|----------|----------|
| NDUFB5 | -0.1133 | 2.91E-02 | 6.97E-02 |
| NDUFB6 | -0.0161 | 7.58E-01 | 8.38E-01 |
| NDUFB7 | -0.0634 | 2.23E-01 | 3.44E-01 |
| NDUFB8 | -0.1888 | 2.54E-04 | 1.35E-03 |
| NDUFB9 | -0.0316 | 5.44E-01 | 6.65E-01 |
| NDUFC1 | -0.1570 | 2.42E-03 | 9.03E-03 |
| NDUFC2 | -0.0938 | 7.11E-02 | 1.42E-01 |
| NDUFS1 | -0.2118 | 3.91E-05 | 2.75E-04 |
| NDUFS2 | 0.0250  | 6.31E-01 | 7.39E-01 |
| NDUFS3 | -0.0713 | 1.71E-01 | 2.80E-01 |
| NDUFS4 | -0.0577 | 2.68E-01 | 3.95E-01 |
| NDUFS5 | -0.0547 | 2.93E-01 | 4.23E-01 |
| NDUFS6 | 0.0761  | 1.43E-01 | 2.45E-01 |
| NDUFS7 | -0.1855 | 3.29E-04 | 1.69E-03 |
| NDUFS8 | -0.0878 | 9.14E-02 | 1.73E-01 |
| NDUFV1 | -0.2230 | 1.46E-05 | 1.17E-04 |
| NDUFV2 | -0.2300 | 7.63E-06 | 6.62E-05 |
| NDUFV3 | -0.0079 | 8.79E-01 | 9.23E-01 |
| NEAT1  | 0.1107  | 3.31E-02 | 7.75E-02 |
| NEBL   | 0.0970  | 6.20E-02 | 1.27E-01 |
| NEB    | 0.1038  | 4.57E-02 | 1.00E-01 |
| NECAB1 | -0.0065 | 9.01E-01 | 9.37E-01 |
| NECAB2 | -0.1215 | 1.92E-02 | 4.98E-02 |
| NECAB3 | 0.1002  | 5.38E-02 | 1.14E-01 |
| NECAP1 | -0.0124 | 8.13E-01 | 8.77E-01 |
| NECAP2 | -0.0550 | 2.91E-01 | 4.20E-01 |
| NEDD1  | 0.2370  | 3.92E-06 | 3.77E-05 |
| NEDD4L | 0.0297  | 5.69E-01 | 6.86E-01 |
| NEDD4  | -0.1705 | 9.79E-04 | 4.22E-03 |
| NEDD8  | 0.0814  | 1.18E-01 | 2.11E-01 |
| NEDD9  | 0.0096  | 8.53E-01 | 9.05E-01 |
| NEFH   | 0.1080  | 3.76E-02 | 8.58E-02 |
| NEFL   | 0.0116  | 8.23E-01 | 8.85E-01 |
| NEFM   | 0.0839  | 1.07E-01 | 1.95E-01 |
| NEGR1  | -0.1373 | 8.07E-03 | 2.45E-02 |
| NEIL1  | -0.0590 | 2.57E-01 | 3.83E-01 |
| NEIL2  | -0.1166 | 2.46E-02 | 6.08E-02 |
| NEIL3  | 0.3280  | 9.37E-11 | 2.75E-09 |
| NEK10  | 0.0087  | 8.67E-01 | 9.15E-01 |
| NEK11  | 0.0414  | 4.27E-01 | 5.59E-01 |
| NEK1   | -0.1736 | 7.83E-04 | 3.49E-03 |
| NEK2   | 0.4712  | 6.65E-22 | 2.14E-19 |
| NEK3   | 0.0572  | 2.72E-01 | 3.99E-01 |
| NEK4   | 0.0974  | 6.08E-02 | 1.26E-01 |



|          |         |          |          |
|----------|---------|----------|----------|
| NEK5     | 0.0570  | 2.74E-01 | 4.02E-01 |
| NEK6     | -0.1902 | 2.29E-04 | 1.24E-03 |
| NEK7     | 0.1345  | 9.48E-03 | 2.80E-02 |
| NEK8     | 0.1074  | 3.87E-02 | 8.78E-02 |
| NEK9     | -0.1006 | 5.27E-02 | 1.12E-01 |
| NELF     | 0.0242  | 6.42E-01 | 7.48E-01 |
| NELL1    | 0.1090  | 3.58E-02 | 8.25E-02 |
| NELL2    | -0.0678 | 1.92E-01 | 3.07E-01 |
| NENF     | 0.1885  | 2.60E-04 | 1.38E-03 |
| NEO1     | 0.0330  | 5.27E-01 | 6.49E-01 |
| NES      | 0.0378  | 4.68E-01 | 5.98E-01 |
| NET1     | 0.0800  | 1.24E-01 | 2.19E-01 |
| NETO1    | -0.1278 | 1.37E-02 | 3.80E-02 |
| NETO2    | 0.0229  | 6.60E-01 | 7.61E-01 |
| NEU1     | 0.1442  | 5.40E-03 | 1.76E-02 |
| NEU2     | -0.0027 | 9.59E-01 | 9.74E-01 |
| NEU3     | -0.0525 | 3.13E-01 | 4.42E-01 |
| NEU4     | 0.0097  | 8.53E-01 | 9.05E-01 |
| NEURL1B  | 0.1038  | 4.57E-02 | 1.00E-01 |
| NEURL2   | -0.0576 | 2.68E-01 | 3.96E-01 |
| NEURL3   | 0.3100  | 1.04E-09 | 2.46E-08 |
| NEURL4   | 0.1308  | 1.17E-02 | 3.31E-02 |
| NEURL    | 0.0387  | 4.57E-01 | 5.88E-01 |
| NEUROD1  | 0.0736  | 1.57E-01 | 2.62E-01 |
| NEUROD2  | 0.1151  | 2.66E-02 | 6.49E-02 |
| NEUROD4  | 0.1828  | 4.03E-04 | 1.99E-03 |
| NEUROD6  | 0.0696  | 1.81E-01 | 2.93E-01 |
| NEUROG1  | 0.0349  | 5.03E-01 | 6.28E-01 |
| NEUROG2  | -0.0020 | 9.70E-01 | 9.81E-01 |
| NEUROG3  | 0.0715  | 1.69E-01 | 2.78E-01 |
| NEXN     | -0.1502 | 3.74E-03 | 1.30E-02 |
| NF1P1    | 0.0217  | 6.77E-01 | 7.76E-01 |
| NF1      | 0.0916  | 7.82E-02 | 1.53E-01 |
| NF2      | 0.1625  | 1.68E-03 | 6.67E-03 |
| NFAM1    | -0.0920 | 7.68E-02 | 1.51E-01 |
| NFASC    | -0.1299 | 1.23E-02 | 3.45E-02 |
| NFAT5    | -0.0555 | 2.87E-01 | 4.15E-01 |
| NFATC1   | -0.0108 | 8.35E-01 | 8.92E-01 |
| NFATC2IP | 0.1723  | 8.62E-04 | 3.78E-03 |
| NFATC2   | -0.0356 | 4.94E-01 | 6.21E-01 |
| NFATC3   | -0.2247 | 1.25E-05 | 1.02E-04 |
| NFATC4   | 0.1098  | 3.46E-02 | 8.03E-02 |
| NFE2L1   | -0.0971 | 6.17E-02 | 1.27E-01 |
| NFE2L2   | -0.0589 | 2.57E-01 | 3.83E-01 |

|         |         |          |          |
|---------|---------|----------|----------|
| NFE2L3  | 0.2507  | 1.00E-06 | 1.14E-05 |
| NFE2    | -0.0996 | 5.52E-02 | 1.16E-01 |
| NFIA    | -0.1485 | 4.15E-03 | 1.42E-02 |
| NFIB    | -0.0182 | 7.26E-01 | 8.14E-01 |
| NFIC    | -0.1090 | 3.59E-02 | 8.26E-02 |
| NFIL3   | -0.0839 | 1.07E-01 | 1.95E-01 |
| NFIX    | -0.1250 | 1.60E-02 | 4.28E-02 |
| NFKB1   | -0.0903 | 8.24E-02 | 1.60E-01 |
| NFKB2   | 0.2229  | 1.46E-05 | 1.18E-04 |
| NFKBIA  | -0.0388 | 4.56E-01 | 5.87E-01 |
| NFKBIB  | -0.0483 | 3.53E-01 | 4.85E-01 |
| NFKBID  | 0.1863  | 3.07E-04 | 1.59E-03 |
| NFKBIE  | 0.1940  | 1.70E-04 | 9.60E-04 |
| NFKBIL1 | 0.1452  | 5.08E-03 | 1.67E-02 |
| NFKBIL2 | 0.3795  | 3.75E-14 | 2.18E-12 |
| NFKBIZ  | 0.1496  | 3.87E-03 | 1.34E-02 |
| NFRKB   | 0.3256  | 1.32E-10 | 3.76E-09 |
| NFS1    | -0.2403 | 2.84E-06 | 2.83E-05 |
| NFU1    | 0.0744  | 1.53E-01 | 2.57E-01 |
| NFX1    | 0.1010  | 5.18E-02 | 1.11E-01 |
| NFXL1   | 0.1605  | 1.93E-03 | 7.48E-03 |
| NFYA    | 0.2294  | 8.09E-06 | 6.95E-05 |
| NFYB    | 0.0338  | 5.17E-01 | 6.41E-01 |
| NFYC    | 0.2872  | 1.78E-08 | 3.12E-07 |
| NGB     | 0.1319  | 1.10E-02 | 3.15E-02 |
| NGDN    | 0.1469  | 4.58E-03 | 1.54E-02 |
| NGEF    | 0.0102  | 8.45E-01 | 8.99E-01 |
| NGFRAP1 | 0.2058  | 6.54E-05 | 4.25E-04 |
| NGFR    | -0.1520 | 3.33E-03 | 1.18E-02 |
| NGF     | -0.0991 | 5.65E-02 | 1.18E-01 |
| NGLY1   | -0.0588 | 2.58E-01 | 3.84E-01 |
| NGRN    | 0.0156  | 7.65E-01 | 8.41E-01 |
| NHEDC1  | 0.0280  | 5.91E-01 | 7.06E-01 |
| NHEDC2  | -0.2744 | 7.81E-08 | 1.16E-06 |
| NHEG1   | 0.0489  | 3.47E-01 | 4.79E-01 |
| NHEJ1   | 0.1274  | 1.40E-02 | 3.86E-02 |
| NHLH1   | 0.2183  | 2.23E-05 | 1.69E-04 |
| NHLH2   | 0.0997  | 5.49E-02 | 1.16E-01 |
| NHLRC1  | 0.0278  | 5.94E-01 | 7.08E-01 |
| NHLRC2  | -0.0853 | 1.01E-01 | 1.87E-01 |
| NHLRC3  | -0.0722 | 1.65E-01 | 2.73E-01 |
| NHLRC4  | 0.0284  | 5.86E-01 | 7.01E-01 |
| NHP2L1  | 0.1118  | 3.13E-02 | 7.40E-02 |
| NHP2    | 0.0535  | 3.04E-01 | 4.33E-01 |

|           |         |          |          |
|-----------|---------|----------|----------|
| NHSL1     | 0.1182  | 2.28E-02 | 5.72E-02 |
| NHSL2     | -0.2374 | 3.79E-06 | 3.65E-05 |
| NHS       | -0.0064 | 9.02E-01 | 9.38E-01 |
| NICN1     | -0.0792 | 1.28E-01 | 2.25E-01 |
| NID1      | 0.0408  | 4.33E-01 | 5.65E-01 |
| NID2      | -0.0693 | 1.83E-01 | 2.95E-01 |
| NIF3L1    | 0.2227  | 1.49E-05 | 1.19E-04 |
| NINJ1     | -0.1023 | 4.89E-02 | 1.06E-01 |
| NINJ2     | -0.0383 | 4.62E-01 | 5.93E-01 |
| NINL      | 0.1241  | 1.68E-02 | 4.46E-02 |
| NIN       | 0.1856  | 3.27E-04 | 1.68E-03 |
| NIP7      | -0.1189 | 2.20E-02 | 5.54E-02 |
| NIPA1     | 0.1704  | 9.84E-04 | 4.24E-03 |
| NIPA2     | 0.0951  | 6.72E-02 | 1.36E-01 |
| NIPAL1    | -0.0999 | 5.46E-02 | 1.15E-01 |
| NIPAL2    | -0.0591 | 2.56E-01 | 3.82E-01 |
| NIPAL3    | 0.0013  | 9.80E-01 | 9.87E-01 |
| NIPAL4    | 0.0290  | 5.78E-01 | 6.95E-01 |
| NIPBL     | 0.1841  | 3.64E-04 | 1.84E-03 |
| NIPSNAP1  | -0.1910 | 2.14E-04 | 1.17E-03 |
| NIPSNAP3A | -0.1743 | 7.46E-04 | 3.35E-03 |
| NIPSNAP3B | -0.0008 | 9.88E-01 | 9.93E-01 |
| NISCH     | 0.1625  | 1.69E-03 | 6.68E-03 |
| NIT1      | 0.1069  | 3.97E-02 | 8.95E-02 |
| NIT2      | -0.2098 | 4.64E-05 | 3.17E-04 |
| NKAIN1    | 0.1526  | 3.22E-03 | 1.15E-02 |
| NKAIN2    | 0.0067  | 8.98E-01 | 9.35E-01 |
| NKAIN3    | -0.0034 | 9.48E-01 | 9.68E-01 |
| NKAIN4    | -0.0015 | 9.77E-01 | 9.85E-01 |
| NKAPL     | -0.2105 | 4.37E-05 | 3.02E-04 |
| NKAP      | 0.2649  | 2.25E-07 | 3.01E-06 |
| NKD1      | -0.0955 | 6.62E-02 | 1.34E-01 |
| NKD2      | 0.0075  | 8.86E-01 | 9.27E-01 |
| NKG7      | -0.0821 | 1.14E-01 | 2.06E-01 |
| NKIRAS1   | -0.1641 | 1.52E-03 | 6.10E-03 |
| NKIRAS2   | 0.2029  | 8.31E-05 | 5.22E-04 |
| NKPD1     | 0.2121  | 3.83E-05 | 2.70E-04 |
| NKRF      | 0.2145  | 3.09E-05 | 2.24E-04 |
| NKTR      | 0.2218  | 1.63E-05 | 1.29E-04 |
| NKX1-2    | -0.1272 | 1.42E-02 | 3.90E-02 |
| NKX2-1    | -0.0151 | 7.73E-01 | 8.47E-01 |
| NKX2-2    | 0.0531  | 3.08E-01 | 4.37E-01 |
| NKX2-3    | -0.0489 | 3.48E-01 | 4.80E-01 |
| NKX2-4    | -0.0960 | 6.46E-02 | 1.32E-01 |

|           |         |          |          |
|-----------|---------|----------|----------|
| NKX2-5    | 0.0537  | 3.02E-01 | 4.31E-01 |
| NKX2-6    | 0.0309  | 5.53E-01 | 6.72E-01 |
| NKX2-8    | -0.0048 | 9.27E-01 | 9.54E-01 |
| NKX3-1    | -0.1325 | 1.06E-02 | 3.06E-02 |
| NKX3-2    | 0.1823  | 4.16E-04 | 2.04E-03 |
| NKX6-1    | 0.0702  | 1.77E-01 | 2.88E-01 |
| NKX6-2    | -0.0930 | 7.35E-02 | 1.46E-01 |
| NKX6-3    | 0.0542  | 2.98E-01 | 4.28E-01 |
| NLE1      | 0.1642  | 1.50E-03 | 6.05E-03 |
| NLGN1     | -0.0239 | 6.46E-01 | 7.51E-01 |
| NLGN2     | -0.1044 | 4.45E-02 | 9.80E-02 |
| NLGN3     | 0.0687  | 1.87E-01 | 3.00E-01 |
| NLGN4X    | -0.0747 | 1.51E-01 | 2.55E-01 |
| NLGN4Y    | -0.0246 | 6.37E-01 | 7.44E-01 |
| NLK       | 0.1833  | 3.86E-04 | 1.93E-03 |
| NLN       | -0.1416 | 6.29E-03 | 1.99E-02 |
| NLRC3     | -0.1048 | 4.36E-02 | 9.66E-02 |
| NLRC4     | -0.0537 | 3.02E-01 | 4.32E-01 |
| NLRC5     | 0.0454  | 3.83E-01 | 5.16E-01 |
| NLRP10    | 0.0446  | 3.91E-01 | 5.24E-01 |
| NLRP11    | -0.0626 | 2.29E-01 | 3.52E-01 |
| NLRP12    | -0.0546 | 2.94E-01 | 4.23E-01 |
| NLRP13    | 0.0316  | 5.44E-01 | 6.65E-01 |
| NLRP14    | -0.1532 | 3.10E-03 | 1.11E-02 |
| NLRP1     | -0.0556 | 2.85E-01 | 4.14E-01 |
| NLRP2     | 0.0823  | 1.13E-01 | 2.05E-01 |
| NLRP3     | -0.1184 | 2.26E-02 | 5.67E-02 |
| NLRP4     | 0.0554  | 2.87E-01 | 4.16E-01 |
| NLRP5     | 0.0744  | 1.53E-01 | 2.57E-01 |
| NLRP6     | -0.2113 | 4.09E-05 | 2.85E-04 |
| NLRP7     | 0.0596  | 2.52E-01 | 3.77E-01 |
| NLRP8     | 0.0118  | 8.21E-01 | 8.83E-01 |
| NLRP9     | 0.1999  | 1.06E-04 | 6.40E-04 |
| NLRX1     | -0.0970 | 6.19E-02 | 1.27E-01 |
| NMBR      | 0.0457  | 3.80E-01 | 5.14E-01 |
| NMB       | 0.1786  | 5.46E-04 | 2.56E-03 |
| NMD3      | -0.1653 | 1.39E-03 | 5.68E-03 |
| NME1-NME2 | -0.1748 | 7.20E-04 | 3.24E-03 |
| NME1      | 0.1361  | 8.68E-03 | 2.60E-02 |
| NME2P1    | 0.1263  | 1.49E-02 | 4.06E-02 |
| NME2      | 0.0542  | 2.98E-01 | 4.28E-01 |
| NME3      | 0.1043  | 4.47E-02 | 9.85E-02 |
| NME4      | -0.0265 | 6.11E-01 | 7.22E-01 |
| NME5      | -0.0533 | 3.06E-01 | 4.35E-01 |

|        |         |          |          |
|--------|---------|----------|----------|
| NME6   | 0.1075  | 3.85E-02 | 8.75E-02 |
| NME7   | 0.4321  | 2.64E-18 | 4.10E-16 |
| NMI    | 0.1089  | 3.60E-02 | 8.27E-02 |
| NMNAT1 | -0.1867 | 3.00E-04 | 1.56E-03 |
| NMNAT2 | -0.0121 | 8.16E-01 | 8.79E-01 |
| NMNAT3 | 0.1260  | 1.51E-02 | 4.10E-02 |
| NMRAL1 | -0.0281 | 5.89E-01 | 7.04E-01 |
| NMT1   | 0.1034  | 4.66E-02 | 1.02E-01 |
| NMT2   | -0.0487 | 3.50E-01 | 4.82E-01 |
| NMUR1  | -0.1199 | 2.08E-02 | 5.31E-02 |
| NMUR2  | 0.0098  | 8.50E-01 | 9.03E-01 |
| NMU    | 0.2459  | 1.63E-06 | 1.74E-05 |
| NNAT   | 0.0955  | 6.60E-02 | 1.34E-01 |
| NNMT   | -0.1498 | 3.84E-03 | 1.33E-02 |
| NNT    | -0.2934 | 8.48E-09 | 1.60E-07 |
| NOB1   | -0.0446 | 3.92E-01 | 5.25E-01 |
| NOBOX  | 0.1145  | 2.74E-02 | 6.63E-02 |
| NOC2L  | -0.0135 | 7.95E-01 | 8.64E-01 |
| NOC3L  | -0.0138 | 7.91E-01 | 8.61E-01 |
| NOC4L  | 0.1078  | 3.80E-02 | 8.66E-02 |
| NOD1   | 0.0897  | 8.44E-02 | 1.62E-01 |
| NOD2   | 0.1175  | 2.37E-02 | 5.89E-02 |
| NODAL  | 0.1570  | 2.42E-03 | 9.02E-03 |
| NOG    | -0.0263 | 6.14E-01 | 7.24E-01 |
| NOL10  | 0.1800  | 4.96E-04 | 2.36E-03 |
| NOL11  | 0.3827  | 2.18E-14 | 1.32E-12 |
| NOL12  | 0.3610  | 7.28E-13 | 3.35E-11 |
| NOL3   | -0.0027 | 9.58E-01 | 9.74E-01 |
| NOL4   | -0.1097 | 3.46E-02 | 8.03E-02 |
| NOL6   | 0.1239  | 1.70E-02 | 4.50E-02 |
| NOL7   | 0.2403  | 2.85E-06 | 2.83E-05 |
| NOL8   | 0.3027  | 2.67E-09 | 5.68E-08 |
| NOL9   | 0.0550  | 2.90E-01 | 4.19E-01 |
| NOLC1  | 0.1120  | 3.11E-02 | 7.35E-02 |
| NOM1   | 0.0245  | 6.38E-01 | 7.45E-01 |
| NOMO1  | 0.0015  | 9.77E-01 | 9.86E-01 |
| NOMO2  | 0.0550  | 2.91E-01 | 4.20E-01 |
| NOMO3  | -0.0054 | 9.17E-01 | 9.48E-01 |
| NONO   | 0.3268  | 1.12E-10 | 3.23E-09 |
| NOP10  | 0.0021  | 9.67E-01 | 9.80E-01 |
| NOP14  | -0.1033 | 4.69E-02 | 1.02E-01 |
| NOP16  | -0.0484 | 3.52E-01 | 4.84E-01 |
| NOP2   | 0.1595  | 2.06E-03 | 7.92E-03 |
| NOP56  | 0.3400  | 1.72E-11 | 5.88E-10 |

|          |         |          |          |
|----------|---------|----------|----------|
| NOP58    | 0.3763  | 6.34E-14 | 3.47E-12 |
| NOS1AP   | 0.1395  | 7.13E-03 | 2.21E-02 |
| NOS1     | -0.2127 | 3.61E-05 | 2.57E-04 |
| NOS2     | -0.0808 | 1.20E-01 | 2.15E-01 |
| NOS3     | -0.1749 | 7.14E-04 | 3.22E-03 |
| NOSIP    | 0.1133  | 2.91E-02 | 6.98E-02 |
| NOSTRIN  | -0.2100 | 4.56E-05 | 3.12E-04 |
| NOTCH1   | 0.1822  | 4.21E-04 | 2.07E-03 |
| NOTCH2NL | 0.2657  | 2.05E-07 | 2.77E-06 |
| NOTCH2   | 0.0286  | 5.83E-01 | 6.99E-01 |
| NOTCH3   | -0.0955 | 6.62E-02 | 1.34E-01 |
| NOTCH4   | -0.1621 | 1.73E-03 | 6.81E-03 |
| NOTO     | 0.0818  | 1.16E-01 | 2.08E-01 |
| NOTUM    | -0.1068 | 3.99E-02 | 8.99E-02 |
| NOVA1    | -0.0058 | 9.12E-01 | 9.45E-01 |
| NOVA2    | -0.1066 | 4.02E-02 | 9.05E-02 |
| NOV      | -0.0545 | 2.95E-01 | 4.24E-01 |
| NOX1     | 0.1031  | 4.72E-02 | 1.03E-01 |
| NOX3     | 0.1450  | 5.14E-03 | 1.69E-02 |
| NOX4     | -0.0452 | 3.85E-01 | 5.18E-01 |
| NOX5     | -0.0557 | 2.84E-01 | 4.13E-01 |
| NOXA1    | 0.0110  | 8.33E-01 | 8.91E-01 |
| NOXO1    | 0.0451  | 3.86E-01 | 5.19E-01 |
| NPAS1    | 0.0975  | 6.06E-02 | 1.25E-01 |
| NPAS2    | 0.1368  | 8.31E-03 | 2.51E-02 |
| NPAS3    | -0.0607 | 2.44E-01 | 3.68E-01 |
| NPAS4    | 0.0540  | 2.99E-01 | 4.29E-01 |
| NPAT     | 0.1300  | 1.22E-02 | 3.44E-02 |
| NPBWR1   | -0.0840 | 1.06E-01 | 1.95E-01 |
| NPB      | 0.1696  | 1.04E-03 | 4.44E-03 |
| NPC1L1   | 0.0159  | 7.60E-01 | 8.38E-01 |
| NPC1     | 0.1516  | 3.42E-03 | 1.21E-02 |
| NPC2     | -0.0418 | 4.23E-01 | 5.55E-01 |
| NPDC1    | -0.1834 | 3.83E-04 | 1.91E-03 |
| NPEPL1   | 0.1631  | 1.63E-03 | 6.48E-03 |
| NPEPPS   | 0.2195  | 1.99E-05 | 1.54E-04 |
| NPFFR1   | -0.0066 | 8.99E-01 | 9.36E-01 |
| NPFFR2   | 0.0778  | 1.35E-01 | 2.33E-01 |
| NPFF     | 0.2028  | 8.37E-05 | 5.26E-04 |
| NPHP1    | 0.1219  | 1.88E-02 | 4.89E-02 |
| NPHP3    | 0.1886  | 2.58E-04 | 1.37E-03 |
| NPHP4    | 0.0652  | 2.10E-01 | 3.29E-01 |
| NPHS1    | 0.1345  | 9.51E-03 | 2.81E-02 |
| NPHS2    | 0.2743  | 7.95E-08 | 1.18E-06 |

|         |         |          |          |
|---------|---------|----------|----------|
| NPIPL3  | 0.2367  | 4.03E-06 | 3.86E-05 |
| NPIP    | 0.2474  | 1.40E-06 | 1.52E-05 |
| NPLOC4  | 0.2769  | 5.87E-08 | 9.01E-07 |
| NPL     | 0.0632  | 2.25E-01 | 3.46E-01 |
| NPM1    | 0.1305  | 1.19E-02 | 3.36E-02 |
| NPM2    | 0.0064  | 9.02E-01 | 9.38E-01 |
| NPM3    | 0.0647  | 2.14E-01 | 3.33E-01 |
| NPNT    | -0.0284 | 5.85E-01 | 7.01E-01 |
| NPPA    | 0.0767  | 1.40E-01 | 2.41E-01 |
| NPPB    | 0.0842  | 1.05E-01 | 1.94E-01 |
| NPPC    | 0.1373  | 8.07E-03 | 2.45E-02 |
| NPR1    | -0.1754 | 6.89E-04 | 3.13E-03 |
| NPR2    | -0.1224 | 1.83E-02 | 4.78E-02 |
| NPR3    | -0.2368 | 4.00E-06 | 3.83E-05 |
| NPRL2   | 0.0943  | 6.98E-02 | 1.40E-01 |
| NPRL3   | -0.0017 | 9.74E-01 | 9.84E-01 |
| NPSR1   | 0.2011  | 9.64E-05 | 5.91E-04 |
| NPTN    | -0.0139 | 7.90E-01 | 8.60E-01 |
| NPTX1   | -0.0054 | 9.17E-01 | 9.48E-01 |
| NPTX2   | 0.1049  | 4.34E-02 | 9.62E-02 |
| NPTXR   | -0.0446 | 3.91E-01 | 5.24E-01 |
| NPVF    | -0.0392 | 4.52E-01 | 5.83E-01 |
| NPW     | 0.0053  | 9.18E-01 | 9.48E-01 |
| NPY1R   | -0.1387 | 7.47E-03 | 2.30E-02 |
| NPY2R   | -0.0560 | 2.82E-01 | 4.11E-01 |
| NPY5R   | -0.1371 | 8.20E-03 | 2.48E-02 |
| NPY6R   | -0.1420 | 6.13E-03 | 1.95E-02 |
| NPY     | -0.0183 | 7.25E-01 | 8.14E-01 |
| NQO1    | 0.1606  | 1.91E-03 | 7.41E-03 |
| NQO2    | -0.0960 | 6.48E-02 | 1.32E-01 |
| NR0B1   | 0.2225  | 1.53E-05 | 1.21E-04 |
| NR0B2   | -0.0742 | 1.53E-01 | 2.58E-01 |
| NR1D1   | 0.1142  | 2.79E-02 | 6.73E-02 |
| NR1D2   | -0.0165 | 7.52E-01 | 8.33E-01 |
| NR1H2   | -0.0503 | 3.34E-01 | 4.65E-01 |
| NR1H3   | 0.0028  | 9.58E-01 | 9.74E-01 |
| NR1H4   | -0.0600 | 2.49E-01 | 3.74E-01 |
| NR1I2   | -0.2075 | 5.66E-05 | 3.77E-04 |
| NR1I3   | -0.1533 | 3.08E-03 | 1.10E-02 |
| NR2C1   | 0.1611  | 1.86E-03 | 7.24E-03 |
| NR2C2AP | 0.3331  | 4.63E-11 | 1.47E-09 |
| NR2C2   | 0.0793  | 1.27E-01 | 2.24E-01 |
| NR2E1   | 0.1170  | 2.42E-02 | 6.00E-02 |
| NR2E3   | 0.1127  | 3.00E-02 | 7.15E-02 |

|        |         |          |          |
|--------|---------|----------|----------|
| NR2F1  | -0.0712 | 1.71E-01 | 2.81E-01 |
| NR2F2  | -0.0692 | 1.84E-01 | 2.96E-01 |
| NR2F6  | -0.0464 | 3.73E-01 | 5.06E-01 |
| NR3C1  | -0.1330 | 1.03E-02 | 3.00E-02 |
| NR3C2  | -0.2192 | 2.05E-05 | 1.58E-04 |
| NR4A1  | -0.1543 | 2.88E-03 | 1.05E-02 |
| NR4A2  | -0.0733 | 1.59E-01 | 2.64E-01 |
| NR4A3  | -0.1336 | 1.00E-02 | 2.92E-02 |
| NR5A1  | 0.1534  | 3.06E-03 | 1.10E-02 |
| NR5A2  | 0.1528  | 3.18E-03 | 1.13E-02 |
| NR6A1  | 0.1819  | 4.28E-04 | 2.09E-03 |
| NRADDP | 0.1380  | 7.76E-03 | 2.37E-02 |
| NRAP   | 0.0095  | 8.56E-01 | 9.06E-01 |
| NRARP  | 0.0939  | 7.09E-02 | 1.42E-01 |
| NRAS   | 0.0653  | 2.09E-01 | 3.28E-01 |
| NRBF2  | -0.2571 | 5.17E-07 | 6.30E-06 |
| NRBP1  | 0.0885  | 8.86E-02 | 1.69E-01 |
| NRBP2  | -0.0952 | 6.69E-02 | 1.35E-01 |
| NRCAM  | 0.1009  | 5.22E-02 | 1.11E-01 |
| NRD1   | 0.1245  | 1.64E-02 | 4.38E-02 |
| NRF1   | 0.4072  | 3.02E-16 | 2.73E-14 |
| NRG1   | -0.1515 | 3.45E-03 | 1.21E-02 |
| NRG2   | 0.0183  | 7.26E-01 | 8.14E-01 |
| NRG3   | 0.0664  | 2.02E-01 | 3.18E-01 |
| NRG4   | 0.0645  | 2.15E-01 | 3.35E-01 |
| NRGN   | 0.0358  | 4.92E-01 | 6.19E-01 |
| NRIP1  | -0.1390 | 7.34E-03 | 2.26E-02 |
| NRIP2  | -0.0139 | 7.89E-01 | 8.60E-01 |
| NRIP3  | 0.0314  | 5.46E-01 | 6.67E-01 |
| NRK    | -0.0726 | 1.63E-01 | 2.70E-01 |
| NRL    | -0.0901 | 8.29E-02 | 1.60E-01 |
| NRM    | 0.4320  | 2.65E-18 | 4.10E-16 |
| NRN1L  | -0.0905 | 8.18E-02 | 1.58E-01 |
| NRN1   | -0.1576 | 2.33E-03 | 8.74E-03 |
| NRP1   | -0.0993 | 5.60E-02 | 1.17E-01 |
| NRP2   | -0.1871 | 2.91E-04 | 1.52E-03 |
| NRSN1  | 0.1104  | 3.35E-02 | 7.83E-02 |
| NRSN2  | 0.1886  | 2.58E-04 | 1.37E-03 |
| NRTN   | 0.0166  | 7.50E-01 | 8.32E-01 |
| NRXN1  | -0.0082 | 8.74E-01 | 9.19E-01 |
| NRXN2  | -0.0129 | 8.04E-01 | 8.71E-01 |
| NRXN3  | 0.0058  | 9.12E-01 | 9.45E-01 |
| NSA2   | 0.0168  | 7.47E-01 | 8.30E-01 |
| NSD1   | 0.1351  | 9.18E-03 | 2.73E-02 |



|         |         |          |          |
|---------|---------|----------|----------|
| NSDHL   | -0.0113 | 8.28E-01 | 8.88E-01 |
| NSFL1C  | 0.0734  | 1.58E-01 | 2.64E-01 |
| NSF     | 0.1649  | 1.44E-03 | 5.84E-03 |
| NSL1    | 0.2736  | 8.57E-08 | 1.27E-06 |
| NSMAF   | 0.1568  | 2.45E-03 | 9.10E-03 |
| NSMCE1  | -0.0728 | 1.61E-01 | 2.68E-01 |
| NSMCE2  | 0.1226  | 1.82E-02 | 4.75E-02 |
| NSMCE4A | -0.0882 | 8.98E-02 | 1.71E-01 |
| NSUN2   | 0.0606  | 2.44E-01 | 3.68E-01 |
| NSUN3   | -0.0445 | 3.93E-01 | 5.26E-01 |
| NSUN4   | 0.0816  | 1.17E-01 | 2.10E-01 |
| NSUN5P1 | 0.1585  | 2.19E-03 | 8.31E-03 |
| NSUN5P2 | 0.1846  | 3.52E-04 | 1.78E-03 |
| NSUN5   | 0.2378  | 3.64E-06 | 3.53E-05 |
| NSUN6   | -0.1570 | 2.42E-03 | 9.02E-03 |
| NSUN7   | 0.2618  | 3.15E-07 | 4.08E-06 |
| NT5C1A  | -0.0005 | 9.93E-01 | 9.96E-01 |
| NT5C1B  | 0.0472  | 3.65E-01 | 4.98E-01 |
| NT5C2   | 0.0227  | 6.62E-01 | 7.63E-01 |
| NT5C3L  | 0.2081  | 5.37E-05 | 3.60E-04 |
| NT5C3   | 0.2157  | 2.79E-05 | 2.06E-04 |
| NT5C    | 0.1060  | 4.13E-02 | 9.25E-02 |
| NT5DC1  | -0.1450 | 5.14E-03 | 1.69E-02 |
| NT5DC2  | 0.2629  | 2.78E-07 | 3.65E-06 |
| NT5DC3  | 0.2033  | 8.02E-05 | 5.05E-04 |
| NT5E    | -0.0512 | 3.25E-01 | 4.56E-01 |
| NT5M    | 0.0692  | 1.84E-01 | 2.96E-01 |
| NTAN1   | 0.0610  | 2.41E-01 | 3.66E-01 |
| NTF3    | -0.2097 | 4.69E-05 | 3.20E-04 |
| NTF4    | 0.0435  | 4.03E-01 | 5.36E-01 |
| NTHL1   | -0.0674 | 1.95E-01 | 3.11E-01 |
| NTM     | 0.0115  | 8.25E-01 | 8.86E-01 |
| NTN1    | -0.0203 | 6.97E-01 | 7.91E-01 |
| NTN3    | -0.0536 | 3.03E-01 | 4.33E-01 |
| NTN4    | -0.1509 | 3.57E-03 | 1.25E-02 |
| NTN5    | 0.1009  | 5.20E-02 | 1.11E-01 |
| NTNG1   | 0.0516  | 3.22E-01 | 4.52E-01 |
| NTNG2   | 0.0427  | 4.12E-01 | 5.45E-01 |
| NTRK1   | 0.0394  | 4.49E-01 | 5.81E-01 |
| NTRK2   | -0.1317 | 1.11E-02 | 3.18E-02 |
| NTRK3   | -0.0447 | 3.91E-01 | 5.24E-01 |
| NTSR1   | 0.0561  | 2.81E-01 | 4.10E-01 |
| NTSR2   | -0.0820 | 1.15E-01 | 2.07E-01 |
| NTS     | 0.0229  | 6.60E-01 | 7.62E-01 |

|          |         |          |          |
|----------|---------|----------|----------|
| NUAK1    | 0.1795  | 5.12E-04 | 2.43E-03 |
| NUAK2    | 0.1597  | 2.03E-03 | 7.82E-03 |
| NUB1     | -0.0785 | 1.31E-01 | 2.29E-01 |
| NUBP1    | -0.0860 | 9.81E-02 | 1.83E-01 |
| NUBP2    | -0.0002 | 9.98E-01 | 9.98E-01 |
| NUBPL    | -0.2278 | 9.38E-06 | 7.95E-05 |
| NUCB1    | -0.2340 | 5.22E-06 | 4.82E-05 |
| NUCB2    | 0.0925  | 7.51E-02 | 1.48E-01 |
| NUCKS1   | 0.2746  | 7.70E-08 | 1.15E-06 |
| NUDCD1   | 0.1280  | 1.36E-02 | 3.77E-02 |
| NUDCD2   | -0.0853 | 1.01E-01 | 1.87E-01 |
| NUDCD3   | -0.0852 | 1.01E-01 | 1.87E-01 |
| NUDC     | 0.0304  | 5.60E-01 | 6.78E-01 |
| NUDT10   | -0.0927 | 7.46E-02 | 1.48E-01 |
| NUDT11   | 0.0869  | 9.45E-02 | 1.78E-01 |
| NUDT12   | -0.1534 | 3.05E-03 | 1.09E-02 |
| NUDT13   | -0.2164 | 2.62E-05 | 1.96E-04 |
| NUDT14   | 0.0138  | 7.92E-01 | 8.62E-01 |
| NUDT15   | -0.0052 | 9.21E-01 | 9.50E-01 |
| NUDT16L1 | 0.0182  | 7.27E-01 | 8.15E-01 |
| NUDT16P1 | -0.1629 | 1.64E-03 | 6.53E-03 |
| NUDT16   | -0.2536 | 7.44E-07 | 8.72E-06 |
| NUDT17   | 0.3202  | 2.73E-10 | 7.40E-09 |
| NUDT18   | -0.1301 | 1.22E-02 | 3.43E-02 |
| NUDT19   | -0.0026 | 9.59E-01 | 9.75E-01 |
| NUDT1    | 0.2605  | 3.60E-07 | 4.58E-06 |
| NUDT21   | -0.0157 | 7.64E-01 | 8.41E-01 |
| NUDT22   | -0.0798 | 1.25E-01 | 2.21E-01 |
| NUDT2    | 0.1440  | 5.45E-03 | 1.77E-02 |
| NUDT3    | 0.0985  | 5.80E-02 | 1.21E-01 |
| NUDT4    | -0.0614 | 2.38E-01 | 3.62E-01 |
| NUDT5    | -0.0089 | 8.64E-01 | 9.12E-01 |
| NUDT6    | -0.1985 | 1.18E-04 | 7.05E-04 |
| NUDT7    | -0.2390 | 3.25E-06 | 3.19E-05 |
| NUDT8    | -0.1988 | 1.16E-04 | 6.92E-04 |
| NUDT9P1  | 0.0059  | 9.10E-01 | 9.43E-01 |
| NUDT9    | -0.2471 | 1.45E-06 | 1.57E-05 |
| NUF2     | 0.5356  | 6.34E-29 | 4.85E-26 |
| NUFIP1   | 0.0654  | 2.09E-01 | 3.27E-01 |
| NUFIP2   | 0.2365  | 4.10E-06 | 3.92E-05 |
| NUMA1    | 0.0476  | 3.60E-01 | 4.93E-01 |
| NUMBL    | 0.1783  | 5.61E-04 | 2.62E-03 |
| NUMB     | -0.1505 | 3.66E-03 | 1.28E-02 |
| NUP107   | 0.2998  | 3.81E-09 | 7.88E-08 |

|         |         |          |          |
|---------|---------|----------|----------|
| NUP133  | 0.3030  | 2.56E-09 | 5.49E-08 |
| NUP153  | 0.1098  | 3.45E-02 | 8.01E-02 |
| NUP155  | 0.3030  | 2.57E-09 | 5.50E-08 |
| NUP160  | 0.2004  | 1.01E-04 | 6.15E-04 |
| NUP188  | 0.3265  | 1.16E-10 | 3.35E-09 |
| NUP205  | 0.2254  | 1.17E-05 | 9.62E-05 |
| NUP210L | 0.0483  | 3.54E-01 | 4.86E-01 |
| NUP210  | 0.3214  | 2.32E-10 | 6.39E-09 |
| NUP214  | 0.3293  | 7.87E-11 | 2.36E-09 |
| NUP35   | 0.1093  | 3.54E-02 | 8.17E-02 |
| NUP37   | 0.2964  | 5.83E-09 | 1.15E-07 |
| NUP43   | 0.3698  | 1.81E-13 | 9.26E-12 |
| NUP50   | 0.1748  | 7.19E-04 | 3.24E-03 |
| NUP54   | 0.1478  | 4.33E-03 | 1.47E-02 |
| NUP62CL | 0.1558  | 2.62E-03 | 9.62E-03 |
| NUP62   | 0.3480  | 5.31E-12 | 2.04E-10 |
| NUP85   | 0.4561  | 1.84E-20 | 5.02E-18 |
| NUP88   | 0.0380  | 4.65E-01 | 5.95E-01 |
| NUP93   | 0.0994  | 5.57E-02 | 1.17E-01 |
| NUP98   | 0.0691  | 1.84E-01 | 2.97E-01 |
| NUPL1   | 0.1541  | 2.91E-03 | 1.05E-02 |
| NUPL2   | 0.2199  | 1.93E-05 | 1.49E-04 |
| NUPR1   | 0.0182  | 7.26E-01 | 8.14E-01 |
| NUS1    | 0.1012  | 5.15E-02 | 1.10E-01 |
| NUSAP1  | 0.4236  | 1.38E-17 | 1.79E-15 |
| NUTF2   | -0.0063 | 9.03E-01 | 9.39E-01 |
| NVL     | 0.4810  | 7.03E-23 | 2.75E-20 |
| NWD1    | 0.0740  | 1.55E-01 | 2.60E-01 |
| NXF1    | 0.2318  | 6.42E-06 | 5.74E-05 |
| NXF2B   | 0.0809  | 1.20E-01 | 2.14E-01 |
| NXF2    | 0.0603  | 2.47E-01 | 3.72E-01 |
| NXF3    | -0.1077 | 3.82E-02 | 8.69E-02 |
| NXF4    | 0.0526  | 3.13E-01 | 4.42E-01 |
| NXF5    | 0.0290  | 5.78E-01 | 6.95E-01 |
| NXNL1   | -0.0544 | 2.96E-01 | 4.26E-01 |
| NXNL2   | 0.0396  | 4.46E-01 | 5.78E-01 |
| NXN     | -0.0984 | 5.83E-02 | 1.21E-01 |
| NXPH1   | -0.0772 | 1.38E-01 | 2.38E-01 |
| NXPH2   | 0.2079  | 5.45E-05 | 3.64E-04 |
| NXPH3   | -0.0123 | 8.13E-01 | 8.77E-01 |
| NXPH4   | 0.1197  | 2.11E-02 | 5.35E-02 |
| NXT1    | 0.2502  | 1.05E-06 | 1.19E-05 |
| NXT2    | 0.1549  | 2.78E-03 | 1.01E-02 |
| NYNRIN  | -0.0765 | 1.41E-01 | 2.42E-01 |

|        |         |          |          |
|--------|---------|----------|----------|
| NYX    | 0.1407  | 6.63E-03 | 2.08E-02 |
| OAF    | -0.2229 | 1.47E-05 | 1.18E-04 |
| OAS1   | -0.0702 | 1.77E-01 | 2.88E-01 |
| OAS2   | -0.1370 | 8.23E-03 | 2.49E-02 |
| OAS3   | 0.1034  | 4.66E-02 | 1.02E-01 |
| OASL   | -0.1404 | 6.75E-03 | 2.11E-02 |
| OAT    | -0.1446 | 5.27E-03 | 1.72E-02 |
| OAZ1   | 0.0181  | 7.29E-01 | 8.16E-01 |
| OAZ2   | -0.2936 | 8.25E-09 | 1.56E-07 |
| OAZ3   | 0.2340  | 5.24E-06 | 4.83E-05 |
| OBFC1  | -0.2981 | 4.74E-09 | 9.53E-08 |
| OBFC2A | -0.0155 | 7.66E-01 | 8.42E-01 |
| OBFC2B | 0.2083  | 5.26E-05 | 3.54E-04 |
| OBP2A  | 0.0621  | 2.33E-01 | 3.56E-01 |
| OBP2B  | 0.0847  | 1.03E-01 | 1.90E-01 |
| OBSCN  | 0.1957  | 1.49E-04 | 8.57E-04 |
| OBSL1  | -0.0281 | 5.90E-01 | 7.05E-01 |
| OC90   | -0.0960 | 6.48E-02 | 1.32E-01 |
| OCA2   | 0.1404  | 6.78E-03 | 2.12E-02 |
| OCEL1  | -0.2790 | 4.62E-08 | 7.28E-07 |
| OCIAD1 | -0.2041 | 7.49E-05 | 4.78E-04 |
| OCIAD2 | -0.1170 | 2.42E-02 | 6.00E-02 |
| OCLM   | 0.2403  | 2.85E-06 | 2.84E-05 |
| OCLN   | 0.0697  | 1.81E-01 | 2.92E-01 |
| OCM2   | -0.0644 | 2.16E-01 | 3.36E-01 |
| OCM    | 0.1563  | 2.54E-03 | 9.37E-03 |
| OCRL   | 0.3440  | 9.66E-12 | 3.45E-10 |
| ODAM   | -0.0328 | 5.29E-01 | 6.51E-01 |
| ODC1   | 0.2504  | 1.03E-06 | 1.16E-05 |
| ODF1   | 0.0919  | 7.69E-02 | 1.51E-01 |
| ODF2L  | 0.1559  | 2.61E-03 | 9.60E-03 |
| ODF2   | 0.2301  | 7.54E-06 | 6.56E-05 |
| ODF3B  | -0.1046 | 4.40E-02 | 9.72E-02 |
| ODF3L1 | -0.0267 | 6.08E-01 | 7.20E-01 |
| ODF3L2 | -0.1141 | 2.80E-02 | 6.76E-02 |
| ODF3   | 0.0156  | 7.64E-01 | 8.41E-01 |
| ODF4   | -0.0733 | 1.59E-01 | 2.65E-01 |
| ODZ1   | -0.0205 | 6.94E-01 | 7.89E-01 |
| ODZ2   | -0.1638 | 1.54E-03 | 6.19E-03 |
| ODZ3   | -0.0407 | 4.34E-01 | 5.66E-01 |
| ODZ4   | -0.0287 | 5.82E-01 | 6.98E-01 |
| OFD1   | 0.3640  | 4.58E-13 | 2.18E-11 |
| OGDHL  | -0.3115 | 8.65E-10 | 2.08E-08 |
| OGDH   | -0.2031 | 8.18E-05 | 5.14E-04 |

|         |         |          |          |
|---------|---------|----------|----------|
| OGFOD1  | -0.2159 | 2.74E-05 | 2.02E-04 |
| OGFOD2  | 0.0558  | 2.83E-01 | 4.12E-01 |
| OGFRL1  | 0.1579  | 2.28E-03 | 8.59E-03 |
| OGFR    | 0.0315  | 5.45E-01 | 6.66E-01 |
| OGG1    | 0.0578  | 2.67E-01 | 3.94E-01 |
| OGN     | -0.1931 | 1.82E-04 | 1.02E-03 |
| OGT     | 0.2451  | 1.77E-06 | 1.88E-05 |
| OIP5    | 0.3950  | 2.66E-15 | 1.94E-13 |
| OIT3    | -0.1817 | 4.37E-04 | 2.12E-03 |
| OLA1    | 0.2673  | 1.73E-07 | 2.38E-06 |
| OLAH    | -0.1654 | 1.39E-03 | 5.67E-03 |
| OLFM1   | -0.0454 | 3.84E-01 | 5.17E-01 |
| OLFM2   | -0.1389 | 7.39E-03 | 2.28E-02 |
| OLFM3   | 0.0530  | 3.09E-01 | 4.38E-01 |
| OLFM4   | 0.1083  | 3.70E-02 | 8.48E-02 |
| OLFML1  | -0.0566 | 2.77E-01 | 4.05E-01 |
| OLFML2A | -0.0276 | 5.96E-01 | 7.10E-01 |
| OLFML2B | 0.0684  | 1.89E-01 | 3.02E-01 |
| OLFML3  | -0.0335 | 5.20E-01 | 6.44E-01 |
| OLIG1   | 0.0397  | 4.46E-01 | 5.77E-01 |
| OLIG2   | 0.0094  | 8.57E-01 | 9.08E-01 |
| OLIG3   | 0.1809  | 4.64E-04 | 2.23E-03 |
| OLR1    | -0.0132 | 8.00E-01 | 8.68E-01 |
| OMA1    | -0.1160 | 2.55E-02 | 6.26E-02 |
| OMD     | -0.2034 | 7.96E-05 | 5.02E-04 |
| OMG     | 0.0364  | 4.84E-01 | 6.12E-01 |
| OMP     | -0.0341 | 5.12E-01 | 6.37E-01 |
| ONECUT1 | 0.0621  | 2.32E-01 | 3.56E-01 |
| ONECUT2 | -0.0846 | 1.04E-01 | 1.91E-01 |
| ONECUT3 | 0.0367  | 4.81E-01 | 6.09E-01 |
| OOEP    | 0.0160  | 7.59E-01 | 8.38E-01 |
| OPA1    | -0.1655 | 1.38E-03 | 5.63E-03 |
| OPA3    | 0.0179  | 7.32E-01 | 8.18E-01 |
| OPALIN  | -0.0925 | 7.51E-02 | 1.48E-01 |
| OPCML   | -0.1276 | 1.39E-02 | 3.84E-02 |
| OPHN1   | 0.0794  | 1.27E-01 | 2.23E-01 |
| OPLAH   | -0.1722 | 8.67E-04 | 3.80E-03 |
| OPN1LW  | 0.0134  | 7.97E-01 | 8.65E-01 |
| OPN1MW  | 0.0541  | 2.98E-01 | 4.28E-01 |
| OPN1SW  | 0.1752  | 7.00E-04 | 3.17E-03 |
| OPN3    | 0.0405  | 4.36E-01 | 5.68E-01 |
| OPN4    | -0.1009 | 5.22E-02 | 1.11E-01 |
| OPN5    | -0.0170 | 7.45E-01 | 8.28E-01 |
| OPRD1   | 0.1068  | 3.98E-02 | 8.98E-02 |

|         |         |          |          |
|---------|---------|----------|----------|
| OPRK1   | 0.0981  | 5.89E-02 | 1.22E-01 |
| OPRL1   | 0.1130  | 2.95E-02 | 7.05E-02 |
| OPRM1   | 0.0499  | 3.38E-01 | 4.69E-01 |
| OPTC    | 0.1064  | 4.06E-02 | 9.12E-02 |
| OPTN    | -0.0002 | 9.97E-01 | 9.98E-01 |
| OR10A2  | 0.0004  | 9.94E-01 | 9.96E-01 |
| OR10A3  | 0.0571  | 2.73E-01 | 4.01E-01 |
| OR10A4  | 0.0192  | 7.12E-01 | 8.03E-01 |
| OR10A5  | 0.0729  | 1.61E-01 | 2.68E-01 |
| OR10A6  | 0.0543  | 2.97E-01 | 4.27E-01 |
| OR10A7  | 0.1671  | 1.24E-03 | 5.14E-03 |
| OR10AD1 | 0.0354  | 4.96E-01 | 6.22E-01 |
| OR10C1  | 0.1123  | 3.06E-02 | 7.25E-02 |
| OR10G2  | 0.1235  | 1.73E-02 | 4.56E-02 |
| OR10G3  | 0.0852  | 1.01E-01 | 1.88E-01 |
| OR10G4  | 0.0514  | 3.23E-01 | 4.54E-01 |
| OR10H1  | 0.0451  | 3.86E-01 | 5.19E-01 |
| OR10H2  | 0.0687  | 1.87E-01 | 3.00E-01 |
| OR10H3  | -0.0349 | 5.03E-01 | 6.28E-01 |
| OR10H4  | 0.0814  | 1.17E-01 | 2.11E-01 |
| OR10H5  | 0.0387  | 4.57E-01 | 5.88E-01 |
| OR10J3  | 0.1139  | 2.83E-02 | 6.82E-02 |
| OR10J5  | -0.0184 | 7.24E-01 | 8.13E-01 |
| OR10P1  | -0.0474 | 3.63E-01 | 4.95E-01 |
| OR10Q1  | 0.0731  | 1.60E-01 | 2.66E-01 |
| OR10V1  | -0.0393 | 4.50E-01 | 5.82E-01 |
| OR10W1  | 0.0213  | 6.82E-01 | 7.79E-01 |
| OR11A1  | 0.1684  | 1.13E-03 | 4.79E-03 |
| OR11G2  | 0.0183  | 7.25E-01 | 8.13E-01 |
| OR11H12 | -0.0312 | 5.49E-01 | 6.70E-01 |
| OR11H1  | 0.0252  | 6.29E-01 | 7.37E-01 |
| OR11H4  | 0.0156  | 7.64E-01 | 8.41E-01 |
| OR11H6  | 0.0280  | 5.90E-01 | 7.05E-01 |
| OR11L1  | 0.0552  | 2.89E-01 | 4.18E-01 |
| OR12D2  | 0.1864  | 3.06E-04 | 1.59E-03 |
| OR12D3  | 0.0851  | 1.02E-01 | 1.88E-01 |
| OR13A1  | 0.1888  | 2.55E-04 | 1.35E-03 |
| OR13C2  | 0.0652  | 2.10E-01 | 3.29E-01 |
| OR13C3  | 0.0074  | 8.87E-01 | 9.28E-01 |
| OR13C4  | -0.0004 | 9.94E-01 | 9.96E-01 |
| OR13C5  | -0.0017 | 9.75E-01 | 9.84E-01 |
| OR13D1  | 0.1136  | 2.86E-02 | 6.89E-02 |
| OR13F1  | -0.0030 | 9.53E-01 | 9.71E-01 |
| OR13G1  | -0.0943 | 6.95E-02 | 1.40E-01 |

|        |         |          |          |
|--------|---------|----------|----------|
| OR13H1 | 0.0267  | 6.09E-01 | 7.20E-01 |
| OR13J1 | -0.0605 | 2.45E-01 | 3.70E-01 |
| OR14I1 | 0.0363  | 4.86E-01 | 6.14E-01 |
| OR14J1 | 0.0672  | 1.97E-01 | 3.13E-01 |
| OR1B1  | 0.0723  | 1.65E-01 | 2.72E-01 |
| OR1C1  | 0.0410  | 4.31E-01 | 5.64E-01 |
| OR1D4  | 0.0285  | 5.84E-01 | 7.00E-01 |
| OR1E1  | -0.0586 | 2.61E-01 | 3.87E-01 |
| OR1E2  | -0.0432 | 4.06E-01 | 5.39E-01 |
| OR1F1  | -0.0505 | 3.32E-01 | 4.63E-01 |
| OR1F2P | -0.0415 | 4.25E-01 | 5.58E-01 |
| OR1G1  | -0.0020 | 9.69E-01 | 9.80E-01 |
| OR1I1  | 0.0643  | 2.16E-01 | 3.36E-01 |
| OR1J1  | 0.1173  | 2.39E-02 | 5.93E-02 |
| OR1J2  | 0.1498  | 3.83E-03 | 1.33E-02 |
| OR1J4  | 0.0852  | 1.01E-01 | 1.88E-01 |
| OR1K1  | -0.0500 | 3.37E-01 | 4.69E-01 |
| OR1L3  | -0.0420 | 4.20E-01 | 5.53E-01 |
| OR1L4  | 0.1346  | 9.42E-03 | 2.79E-02 |
| OR1L6  | 0.0064  | 9.02E-01 | 9.38E-01 |
| OR1L8  | -0.1378 | 7.84E-03 | 2.39E-02 |
| OR1N1  | 0.0632  | 2.24E-01 | 3.46E-01 |
| OR1N2  | 0.0919  | 7.71E-02 | 1.51E-01 |
| OR1Q1  | 0.0825  | 1.13E-01 | 2.04E-01 |
| OR1S2  | 0.0844  | 1.05E-01 | 1.92E-01 |
| OR2A12 | -0.0563 | 2.79E-01 | 4.08E-01 |
| OR2A14 | 0.0168  | 7.46E-01 | 8.29E-01 |
| OR2A1  | 0.0327  | 5.30E-01 | 6.53E-01 |
| OR2A25 | 0.0552  | 2.89E-01 | 4.18E-01 |
| OR2A2  | 0.0565  | 2.78E-01 | 4.07E-01 |
| OR2A4  | 0.0613  | 2.39E-01 | 3.63E-01 |
| OR2A5  | 0.0073  | 8.88E-01 | 9.28E-01 |
| OR2A7  | 0.0666  | 2.01E-01 | 3.17E-01 |
| OR2A9P | 0.0966  | 6.32E-02 | 1.29E-01 |
| OR2AE1 | -0.0193 | 7.11E-01 | 8.03E-01 |
| OR2AG1 | 0.0245  | 6.38E-01 | 7.44E-01 |
| OR2AG2 | -0.0144 | 7.82E-01 | 8.55E-01 |
| OR2AK2 | 0.0066  | 8.99E-01 | 9.36E-01 |
| OR2AT4 | 0.0377  | 4.70E-01 | 5.99E-01 |
| OR2B11 | 0.0405  | 4.36E-01 | 5.68E-01 |
| OR2B2  | 0.1488  | 4.08E-03 | 1.40E-02 |
| OR2B3  | 0.0315  | 5.46E-01 | 6.66E-01 |
| OR2B6  | 0.3069  | 1.57E-09 | 3.57E-08 |
| OR2C1  | -0.0414 | 4.27E-01 | 5.59E-01 |

|        |         |          |          |
|--------|---------|----------|----------|
| OR2C3  | 0.1618  | 1.76E-03 | 6.93E-03 |
| OR2D2  | 0.1326  | 1.06E-02 | 3.06E-02 |
| OR2F1  | -0.0460 | 3.77E-01 | 5.11E-01 |
| OR2F2  | -0.0386 | 4.59E-01 | 5.89E-01 |
| OR2G6  | 0.0696  | 1.81E-01 | 2.93E-01 |
| OR2H1  | 0.1815  | 4.43E-04 | 2.15E-03 |
| OR2H2  | 0.1323  | 1.08E-02 | 3.10E-02 |
| OR2J2  | -0.0044 | 9.33E-01 | 9.58E-01 |
| OR2J3  | 0.0541  | 2.99E-01 | 4.28E-01 |
| OR2K2  | 0.1327  | 1.05E-02 | 3.04E-02 |
| OR2L13 | -0.0384 | 4.61E-01 | 5.91E-01 |
| OR2L1P | -0.0895 | 8.53E-02 | 1.64E-01 |
| OR2L2  | 0.0984  | 5.83E-02 | 1.21E-01 |
| OR2L3  | 0.0170  | 7.45E-01 | 8.28E-01 |
| OR2S2  | 0.0184  | 7.24E-01 | 8.13E-01 |
| OR2T10 | 0.0278  | 5.94E-01 | 7.08E-01 |
| OR2T2  | -0.0170 | 7.44E-01 | 8.27E-01 |
| OR2T33 | -0.0096 | 8.53E-01 | 9.05E-01 |
| OR2T34 | 0.0365  | 4.83E-01 | 6.12E-01 |
| OR2T3  | 0.0729  | 1.61E-01 | 2.68E-01 |
| OR2T4  | 0.0384  | 4.61E-01 | 5.92E-01 |
| OR2T5  | 0.0799  | 1.24E-01 | 2.20E-01 |
| OR2T8  | -0.0146 | 7.80E-01 | 8.53E-01 |
| OR2V2  | 0.0265  | 6.11E-01 | 7.22E-01 |
| OR2W3  | -0.1181 | 2.29E-02 | 5.73E-02 |
| OR2W5  | 0.1241  | 1.68E-02 | 4.46E-02 |
| OR2Z1  | 0.1242  | 1.67E-02 | 4.43E-02 |
| OR3A1  | 0.1212  | 1.95E-02 | 5.04E-02 |
| OR3A2  | 0.0603  | 2.46E-01 | 3.71E-01 |
| OR3A3  | 0.0052  | 9.20E-01 | 9.49E-01 |
| OR3A4  | 0.0653  | 2.10E-01 | 3.28E-01 |
| OR4A16 | 0.1799  | 4.99E-04 | 2.37E-03 |
| OR4A47 | -0.0931 | 7.34E-02 | 1.46E-01 |
| OR4C6  | 0.0242  | 6.42E-01 | 7.47E-01 |
| OR4D10 | 0.0526  | 3.12E-01 | 4.42E-01 |
| OR4D11 | 0.0140  | 7.88E-01 | 8.59E-01 |
| OR4D1  | -0.0421 | 4.19E-01 | 5.52E-01 |
| OR4D6  | 0.0139  | 7.90E-01 | 8.61E-01 |
| OR4D9  | 0.0093  | 8.59E-01 | 9.09E-01 |
| OR4E2  | 0.0825  | 1.13E-01 | 2.04E-01 |
| OR4F17 | -0.0304 | 5.59E-01 | 6.77E-01 |
| OR4F21 | -0.0675 | 1.94E-01 | 3.10E-01 |
| OR4F29 | 0.1232  | 1.76E-02 | 4.62E-02 |
| OR4F4  | -0.0332 | 5.24E-01 | 6.48E-01 |



|        |         |          |          |
|--------|---------|----------|----------|
| OR4F5  | -0.0438 | 4.00E-01 | 5.33E-01 |
| OR4K14 | -0.0355 | 4.96E-01 | 6.22E-01 |
| OR4K1  | 0.0163  | 7.54E-01 | 8.35E-01 |
| OR4K2  | 0.0399  | 4.43E-01 | 5.75E-01 |
| OR4M1  | 0.0008  | 9.88E-01 | 9.93E-01 |
| OR4M2  | -0.0267 | 6.09E-01 | 7.20E-01 |
| OR4N2  | -0.0610 | 2.41E-01 | 3.66E-01 |
| OR4N3P | -0.0324 | 5.33E-01 | 6.56E-01 |
| OR4N4  | -0.0403 | 4.39E-01 | 5.70E-01 |
| OR4Q3  | -0.0721 | 1.66E-01 | 2.74E-01 |
| OR51B2 | 0.0896  | 8.49E-02 | 1.63E-01 |
| OR51B4 | 0.1345  | 9.47E-03 | 2.80E-02 |
| OR51B5 | 0.1238  | 1.70E-02 | 4.51E-02 |
| OR51B6 | 0.0324  | 5.33E-01 | 6.56E-01 |
| OR51E1 | 0.0534  | 3.05E-01 | 4.34E-01 |
| OR51E2 | -0.0624 | 2.30E-01 | 3.53E-01 |
| OR51G2 | 0.0330  | 5.26E-01 | 6.49E-01 |
| OR51I1 | 0.0752  | 1.48E-01 | 2.52E-01 |
| OR51I2 | 0.0907  | 8.10E-02 | 1.57E-01 |
| OR51M1 | 0.0232  | 6.56E-01 | 7.58E-01 |
| OR51Q1 | 0.1556  | 2.65E-03 | 9.72E-03 |
| OR52A4 | -0.0064 | 9.02E-01 | 9.38E-01 |
| OR52B2 | 0.0473  | 3.63E-01 | 4.96E-01 |
| OR52B4 | 0.1237  | 1.71E-02 | 4.52E-02 |
| OR52B6 | 0.0448  | 3.89E-01 | 5.22E-01 |
| OR52D1 | 0.1024  | 4.88E-02 | 1.06E-01 |
| OR52E2 | -0.0483 | 3.53E-01 | 4.85E-01 |
| OR52E4 | -0.0428 | 4.11E-01 | 5.44E-01 |
| OR52E6 | 0.0287  | 5.81E-01 | 6.97E-01 |
| OR52E8 | 0.1002  | 5.39E-02 | 1.14E-01 |
| OR52H1 | 0.0171  | 7.42E-01 | 8.26E-01 |
| OR52I1 | 0.1016  | 5.05E-02 | 1.08E-01 |
| OR52I2 | -0.0333 | 5.23E-01 | 6.47E-01 |
| OR52K1 | -0.1092 | 3.55E-02 | 8.19E-02 |
| OR52K2 | 0.0116  | 8.24E-01 | 8.85E-01 |
| OR52L1 | 0.1019  | 4.99E-02 | 1.07E-01 |
| OR52M1 | -0.0412 | 4.28E-01 | 5.61E-01 |
| OR52N1 | -0.0368 | 4.80E-01 | 6.09E-01 |
| OR52N2 | 0.0971  | 6.16E-02 | 1.27E-01 |
| OR52N4 | 0.0636  | 2.21E-01 | 3.42E-01 |
| OR52N5 | -0.0279 | 5.92E-01 | 7.06E-01 |
| OR52R1 | -0.0589 | 2.58E-01 | 3.84E-01 |
| OR52W1 | -0.0240 | 6.45E-01 | 7.50E-01 |
| OR56A1 | -0.0220 | 6.73E-01 | 7.72E-01 |

|          |         |          |          |
|----------|---------|----------|----------|
| OR56A3   | 0.0530  | 3.09E-01 | 4.38E-01 |
| OR56A4   | 0.0350  | 5.02E-01 | 6.28E-01 |
| OR56A5   | 0.0927  | 7.46E-02 | 1.48E-01 |
| OR56B1   | -0.0010 | 9.84E-01 | 9.90E-01 |
| OR56B4   | 0.0610  | 2.41E-01 | 3.66E-01 |
| OR5A1    | 0.0871  | 9.39E-02 | 1.77E-01 |
| OR5AK2   | -0.0809 | 1.20E-01 | 2.14E-01 |
| OR5AN1   | 0.0065  | 9.01E-01 | 9.37E-01 |
| OR5AP2   | 0.0412  | 4.29E-01 | 5.62E-01 |
| OR5AU1   | 0.0237  | 6.49E-01 | 7.53E-01 |
| OR5B12   | 0.1110  | 3.25E-02 | 7.63E-02 |
| OR5B21   | -0.0081 | 8.77E-01 | 9.21E-01 |
| OR5B2    | -0.0070 | 8.93E-01 | 9.32E-01 |
| OR5C1    | 0.0333  | 5.23E-01 | 6.47E-01 |
| OR5E1P   | -0.0622 | 2.32E-01 | 3.55E-01 |
| OR5H2    | 0.0506  | 3.31E-01 | 4.62E-01 |
| OR5H6    | 0.0008  | 9.88E-01 | 9.92E-01 |
| OR5K1    | 0.0405  | 4.36E-01 | 5.68E-01 |
| OR5K2    | 0.0888  | 8.77E-02 | 1.67E-01 |
| OR5K3    | -0.0755 | 1.47E-01 | 2.49E-01 |
| OR5K4    | 0.0850  | 1.02E-01 | 1.88E-01 |
| OR5M10   | 0.0493  | 3.43E-01 | 4.75E-01 |
| OR5M11   | 0.0574  | 2.70E-01 | 3.98E-01 |
| OR5M8    | 0.0217  | 6.77E-01 | 7.75E-01 |
| OR5P3    | 0.0901  | 8.31E-02 | 1.60E-01 |
| OR5V1    | 0.1061  | 4.11E-02 | 9.21E-02 |
| OR6A2    | 0.0394  | 4.49E-01 | 5.80E-01 |
| OR6B1    | -0.0092 | 8.59E-01 | 9.09E-01 |
| OR6B2    | 0.0894  | 8.54E-02 | 1.64E-01 |
| OR6B3    | 0.0003  | 9.95E-01 | 9.97E-01 |
| OR6C2    | 0.1124  | 3.04E-02 | 7.23E-02 |
| OR6C3    | 0.1039  | 4.56E-02 | 1.00E-01 |
| OR6C68   | 0.0175  | 7.38E-01 | 8.23E-01 |
| OR6C70   | 0.0691  | 1.84E-01 | 2.96E-01 |
| OR6F1    | 0.0458  | 3.79E-01 | 5.12E-01 |
| OR6K3    | -0.0057 | 9.13E-01 | 9.46E-01 |
| OR6M1    | 0.0091  | 8.61E-01 | 9.10E-01 |
| OR6S1    | 0.0555  | 2.86E-01 | 4.15E-01 |
| OR6T1    | 0.0853  | 1.01E-01 | 1.87E-01 |
| OR6W1P   | -0.0078 | 8.81E-01 | 9.24E-01 |
| OR7A5    | 0.1116  | 3.16E-02 | 7.45E-02 |
| OR7C1    | 0.1457  | 4.92E-03 | 1.63E-02 |
| OR7D2    | -0.0791 | 1.28E-01 | 2.25E-01 |
| OR7E156P | 0.1458  | 4.90E-03 | 1.62E-02 |

|         |         |          |          |
|---------|---------|----------|----------|
| OR7E24  | -0.0461 | 3.76E-01 | 5.09E-01 |
| OR7E37P | -0.0401 | 4.41E-01 | 5.73E-01 |
| OR7E5P  | 0.1284  | 1.33E-02 | 3.71E-02 |
| OR7E91P | 0.0686  | 1.87E-01 | 3.01E-01 |
| OR8A1   | 0.1316  | 1.12E-02 | 3.19E-02 |
| OR8B12  | -0.0159 | 7.61E-01 | 8.39E-01 |
| OR8B2   | 0.0996  | 5.53E-02 | 1.16E-01 |
| OR8B3   | 0.0170  | 7.44E-01 | 8.28E-01 |
| OR8B8   | 0.0909  | 8.02E-02 | 1.56E-01 |
| OR8D1   | 0.0810  | 1.19E-01 | 2.14E-01 |
| OR8D2   | 0.0461  | 3.76E-01 | 5.10E-01 |
| OR8G2   | 0.0946  | 6.87E-02 | 1.38E-01 |
| OR8G5   | 0.0197  | 7.06E-01 | 7.98E-01 |
| OR8I2   | -0.0563 | 2.79E-01 | 4.08E-01 |
| OR8K3   | -0.0056 | 9.14E-01 | 9.46E-01 |
| OR8S1   | 0.0273  | 6.01E-01 | 7.13E-01 |
| OR9A2   | -0.0242 | 6.42E-01 | 7.47E-01 |
| OR9A4   | 0.0531  | 3.08E-01 | 4.37E-01 |
| OR9I1   | 0.1152  | 2.65E-02 | 6.47E-02 |
| OR9Q1   | 0.0208  | 6.90E-01 | 7.85E-01 |
| ORAI1   | -0.0089 | 8.64E-01 | 9.12E-01 |
| ORAI2   | 0.0118  | 8.21E-01 | 8.82E-01 |
| ORAI3   | -0.2378 | 3.65E-06 | 3.53E-05 |
| ORAOV1  | 0.1262  | 1.50E-02 | 4.07E-02 |
| ORC1L   | 0.4352  | 1.41E-18 | 2.42E-16 |
| ORC2L   | 0.2673  | 1.73E-07 | 2.39E-06 |
| ORC3L   | 0.3320  | 5.36E-11 | 1.67E-09 |
| ORC4L   | 0.2364  | 4.14E-06 | 3.94E-05 |
| ORC5L   | -0.0399 | 4.44E-01 | 5.76E-01 |
| ORC6L   | 0.3702  | 1.72E-13 | 8.85E-12 |
| ORM1    | -0.0807 | 1.21E-01 | 2.16E-01 |
| ORM2    | -0.1068 | 3.98E-02 | 8.99E-02 |
| ORMDL1  | 0.1092  | 3.54E-02 | 8.18E-02 |
| ORMDL2  | -0.0187 | 7.19E-01 | 8.09E-01 |
| ORMDL3  | -0.1787 | 5.44E-04 | 2.56E-03 |
| OS9     | -0.1810 | 4.60E-04 | 2.22E-03 |
| OSBP2   | 0.3031  | 2.52E-09 | 5.42E-08 |
| OSBPL10 | 0.0485  | 3.52E-01 | 4.84E-01 |
| OSBPL11 | -0.1826 | 4.08E-04 | 2.01E-03 |
| OSBPL1A | -0.1253 | 1.57E-02 | 4.22E-02 |
| OSBPL2  | 0.0360  | 4.89E-01 | 6.16E-01 |
| OSBPL3  | 0.1971  | 1.33E-04 | 7.80E-04 |
| OSBPL5  | -0.0612 | 2.40E-01 | 3.64E-01 |
| OSBPL6  | 0.0185  | 7.23E-01 | 8.12E-01 |

|          |         |          |          |
|----------|---------|----------|----------|
| OSBPL7   | 0.0383  | 4.62E-01 | 5.92E-01 |
| OSBPL8   | -0.0037 | 9.43E-01 | 9.64E-01 |
| OSBPL9   | 0.0182  | 7.26E-01 | 8.14E-01 |
| OSBP     | -0.2083 | 5.26E-05 | 3.53E-04 |
| OSCAR    | -0.0639 | 2.19E-01 | 3.40E-01 |
| OSCP1    | 0.0365  | 4.83E-01 | 6.12E-01 |
| OSGEPL1  | 0.0483  | 3.54E-01 | 4.86E-01 |
| OSGEP    | -0.0180 | 7.30E-01 | 8.17E-01 |
| OSGIN1   | -0.1445 | 5.28E-03 | 1.73E-02 |
| OSGIN2   | -0.0365 | 4.83E-01 | 6.11E-01 |
| OSMR     | -0.0481 | 3.55E-01 | 4.87E-01 |
| OSM      | -0.0698 | 1.80E-01 | 2.91E-01 |
| OSR1     | -0.0490 | 3.46E-01 | 4.78E-01 |
| OSR2     | -0.0103 | 8.44E-01 | 8.98E-01 |
| OST4     | -0.0126 | 8.08E-01 | 8.74E-01 |
| OSTBETA  | 0.0174  | 7.38E-01 | 8.23E-01 |
| OSTCL    | -0.0043 | 9.35E-01 | 9.59E-01 |
| OSTC     | -0.0029 | 9.56E-01 | 9.73E-01 |
| OSTF1    | -0.1182 | 2.27E-02 | 5.70E-02 |
| OSTM1    | 0.0732  | 1.60E-01 | 2.66E-01 |
| OSTN     | 0.0381  | 4.64E-01 | 5.94E-01 |
| OSTalpha | -0.1210 | 1.98E-02 | 5.09E-02 |
| OTC      | -0.2658 | 2.03E-07 | 2.75E-06 |
| OTOA     | -0.1496 | 3.87E-03 | 1.34E-02 |
| OTOF     | 0.0910  | 8.00E-02 | 1.56E-01 |
| OTOL1    | 0.0610  | 2.41E-01 | 3.66E-01 |
| OTOP1    | 0.0473  | 3.63E-01 | 4.96E-01 |
| OTOP2    | 0.1008  | 5.25E-02 | 1.12E-01 |
| OTOP3    | 0.1123  | 3.05E-02 | 7.24E-02 |
| OTOR     | 0.1049  | 4.34E-02 | 9.62E-02 |
| OTOS     | -0.0155 | 7.66E-01 | 8.42E-01 |
| OTP      | 0.2272  | 9.86E-06 | 8.31E-05 |
| OTUB1    | 0.0335  | 5.20E-01 | 6.44E-01 |
| OTUB2    | 0.0227  | 6.63E-01 | 7.64E-01 |
| OTUD1    | 0.1404  | 6.77E-03 | 2.12E-02 |
| OTUD3    | 0.3364  | 2.86E-11 | 9.44E-10 |
| OTUD4    | -0.0914 | 7.86E-02 | 1.54E-01 |
| OTUD5    | -0.0324 | 5.34E-01 | 6.56E-01 |
| OTUD6A   | 0.0076  | 8.85E-01 | 9.26E-01 |
| OTUD6B   | 0.0564  | 2.79E-01 | 4.07E-01 |
| OTUD7A   | -0.0738 | 1.56E-01 | 2.61E-01 |
| OTUD7B   | 0.3172  | 4.09E-10 | 1.07E-08 |
| OTX1     | 0.1284  | 1.33E-02 | 3.71E-02 |
| OTX2     | 0.1542  | 2.91E-03 | 1.05E-02 |

|           |         |          |          |
|-----------|---------|----------|----------|
| OVCA2     | -0.0870 | 9.41E-02 | 1.77E-01 |
| OVCH1     | -0.0046 | 9.29E-01 | 9.56E-01 |
| OVCH2     | 0.1422  | 6.09E-03 | 1.94E-02 |
| OVGP1     | -0.0345 | 5.08E-01 | 6.33E-01 |
| OVOL1     | 0.1006  | 5.28E-02 | 1.12E-01 |
| OVOL2     | 0.2166  | 2.57E-05 | 1.92E-04 |
| OXA1L     | -0.1620 | 1.74E-03 | 6.85E-03 |
| OXCT1     | 0.0666  | 2.00E-01 | 3.17E-01 |
| OXCT2     | 0.1165  | 2.49E-02 | 6.12E-02 |
| OXER1     | 0.0533  | 3.06E-01 | 4.35E-01 |
| OXGR1     | 0.0374  | 4.72E-01 | 6.01E-01 |
| OXNAD1    | -0.2869 | 1.84E-08 | 3.23E-07 |
| OXR1      | -0.0682 | 1.90E-01 | 3.04E-01 |
| OXSM      | -0.1902 | 2.29E-04 | 1.24E-03 |
| OXSR1     | -0.0127 | 8.08E-01 | 8.73E-01 |
| OXTR      | 0.0725  | 1.63E-01 | 2.71E-01 |
| OXT       | 0.0155  | 7.66E-01 | 8.42E-01 |
| P2RX1     | -0.0720 | 1.66E-01 | 2.75E-01 |
| P2RX2     | -0.0788 | 1.30E-01 | 2.27E-01 |
| P2RX3     | -0.1412 | 6.44E-03 | 2.03E-02 |
| P2RX4     | 0.2330  | 5.74E-06 | 5.21E-05 |
| P2RX5     | 0.1505  | 3.67E-03 | 1.28E-02 |
| P2RX6     | -0.0540 | 2.99E-01 | 4.29E-01 |
| P2RX7     | -0.0025 | 9.61E-01 | 9.76E-01 |
| P2RY10    | -0.0480 | 3.56E-01 | 4.88E-01 |
| P2RY11    | 0.1007  | 5.26E-02 | 1.12E-01 |
| P2RY12    | -0.1718 | 8.94E-04 | 3.91E-03 |
| P2RY13    | -0.1442 | 5.39E-03 | 1.76E-02 |
| P2RY14    | -0.1762 | 6.52E-04 | 2.98E-03 |
| P2RY1     | -0.0673 | 1.96E-01 | 3.11E-01 |
| P2RY2     | 0.0304  | 5.60E-01 | 6.78E-01 |
| P2RY4     | 0.0811  | 1.19E-01 | 2.13E-01 |
| P2RY6     | 0.0481  | 3.56E-01 | 4.88E-01 |
| P2RY8     | -0.1625 | 1.68E-03 | 6.67E-03 |
| P4HA1     | -0.1115 | 3.18E-02 | 7.49E-02 |
| P4HA2     | -0.0518 | 3.19E-01 | 4.49E-01 |
| P4HA3     | -0.1011 | 5.18E-02 | 1.10E-01 |
| P4HB      | -0.0621 | 2.33E-01 | 3.56E-01 |
| P4HTM     | 0.0880  | 9.05E-02 | 1.72E-01 |
| P704P     | 0.0808  | 1.20E-01 | 2.15E-01 |
| PA2G4P4   | 0.2470  | 1.46E-06 | 1.59E-05 |
| PA2G4     | 0.2037  | 7.78E-05 | 4.93E-04 |
| PAAF1     | -0.0242 | 6.42E-01 | 7.47E-01 |
| PABPC1L2A | 0.0135  | 7.95E-01 | 8.64E-01 |

|           |         |          |          |
|-----------|---------|----------|----------|
| PABPC1L2B | -0.0580 | 2.65E-01 | 3.92E-01 |
| PABPC1L   | 0.3789  | 4.12E-14 | 2.37E-12 |
| PABPC1P2  | 0.1031  | 4.72E-02 | 1.03E-01 |
| PABPC1    | 0.0710  | 1.72E-01 | 2.82E-01 |
| PABPC3    | 0.0784  | 1.32E-01 | 2.30E-01 |
| PABPC4L   | -0.0632 | 2.25E-01 | 3.46E-01 |
| PABPC4    | 0.1240  | 1.69E-02 | 4.47E-02 |
| PABPC5    | -0.0461 | 3.76E-01 | 5.10E-01 |
| PABPN1L   | -0.0180 | 7.29E-01 | 8.16E-01 |
| PABPN1    | 0.1648  | 1.44E-03 | 5.85E-03 |
| PACRGL    | 0.1070  | 3.95E-02 | 8.92E-02 |
| PACRG     | -0.2005 | 1.01E-04 | 6.15E-04 |
| PACS1     | 0.0767  | 1.40E-01 | 2.41E-01 |
| PACS2     | 0.0659  | 2.05E-01 | 3.23E-01 |
| PACSIN1   | 0.1403  | 6.78E-03 | 2.12E-02 |
| PACSIN2   | -0.1303 | 1.20E-02 | 3.40E-02 |
| PACSIN3   | 0.1308  | 1.17E-02 | 3.32E-02 |
| PADI1     | -0.1059 | 4.15E-02 | 9.28E-02 |
| PADI2     | 0.0164  | 7.52E-01 | 8.33E-01 |
| PADI3     | 0.0194  | 7.10E-01 | 8.02E-01 |
| PADI4     | -0.1642 | 1.51E-03 | 6.08E-03 |
| PADI6     | 0.0604  | 2.46E-01 | 3.70E-01 |
| PAEP      | -0.0050 | 9.24E-01 | 9.52E-01 |
| PAF1      | 0.0027  | 9.58E-01 | 9.74E-01 |
| PAFAH1B1  | -0.0799 | 1.25E-01 | 2.20E-01 |
| PAFAH1B2  | -0.0604 | 2.46E-01 | 3.70E-01 |
| PAFAH1B3  | 0.2249  | 1.22E-05 | 9.97E-05 |
| PAFAH2    | -0.3925 | 4.13E-15 | 2.90E-13 |
| PAG1      | 0.0456  | 3.82E-01 | 5.15E-01 |
| PAGE1     | 0.1364  | 8.51E-03 | 2.56E-02 |
| PAGE2B    | 0.0744  | 1.53E-01 | 2.57E-01 |
| PAGE2     | 0.1014  | 5.09E-02 | 1.09E-01 |
| PAGE3     | 0.0663  | 2.02E-01 | 3.19E-01 |
| PAGE4     | -0.1045 | 4.44E-02 | 9.78E-02 |
| PAGE5     | -0.0231 | 6.57E-01 | 7.59E-01 |
| PAH       | -0.1781 | 5.70E-04 | 2.65E-03 |
| PAICS     | -0.0189 | 7.17E-01 | 8.08E-01 |
| PAIP1     | -0.0083 | 8.73E-01 | 9.18E-01 |
| PAIP2B    | -0.1146 | 2.73E-02 | 6.61E-02 |
| PAIP2     | -0.0372 | 4.75E-01 | 6.04E-01 |
| PAK1IP1   | 0.1615  | 1.81E-03 | 7.08E-03 |
| PAK1      | 0.1940  | 1.70E-04 | 9.59E-04 |
| PAK2      | 0.1154  | 2.63E-02 | 6.42E-02 |
| PAK3      | -0.0124 | 8.12E-01 | 8.76E-01 |

|             |         |          |          |
|-------------|---------|----------|----------|
| PAK4        | 0.2267  | 1.03E-05 | 8.65E-05 |
| PAK6        | 0.2578  | 4.82E-07 | 5.92E-06 |
| PAK7        | 0.1484  | 4.17E-03 | 1.42E-02 |
| PALB2       | 0.1554  | 2.68E-03 | 9.83E-03 |
| PALLD       | -0.0386 | 4.59E-01 | 5.89E-01 |
| PALM2-AKAP2 | -0.2738 | 8.41E-08 | 1.24E-06 |
| PALM2       | -0.2339 | 5.29E-06 | 4.86E-05 |
| PALM3       | -0.0101 | 8.46E-01 | 8.99E-01 |
| PALMD       | -0.2106 | 4.33E-05 | 3.00E-04 |
| PALM        | 0.1057  | 4.19E-02 | 9.35E-02 |
| PAMR1       | -0.1772 | 6.06E-04 | 2.79E-03 |
| PAM         | -0.1245 | 1.64E-02 | 4.37E-02 |
| PAN2        | -0.0068 | 8.97E-01 | 9.34E-01 |
| PAN3        | 0.1496  | 3.89E-03 | 1.34E-02 |
| PANK1       | -0.3305 | 6.61E-11 | 2.01E-09 |
| PANK2       | 0.1237  | 1.71E-02 | 4.53E-02 |
| PANK3       | -0.0490 | 3.46E-01 | 4.78E-01 |
| PANK4       | -0.0663 | 2.02E-01 | 3.20E-01 |
| PANX1       | -0.1406 | 6.69E-03 | 2.10E-02 |
| PANX2       | 0.0034  | 9.48E-01 | 9.68E-01 |
| PANX3       | 0.1170  | 2.42E-02 | 6.00E-02 |
| PAOX        | -0.2391 | 3.19E-06 | 3.13E-05 |
| PAPD4       | -0.0749 | 1.50E-01 | 2.54E-01 |
| PAPD5       | -0.2270 | 1.00E-05 | 8.45E-05 |
| PAPD7       | 0.1373  | 8.07E-03 | 2.45E-02 |
| PAPLN       | 0.1020  | 4.96E-02 | 1.07E-01 |
| PAPL        | 0.1487  | 4.11E-03 | 1.41E-02 |
| PAPOLA      | 0.0461  | 3.75E-01 | 5.09E-01 |
| PAPOLB      | 0.1011  | 5.17E-02 | 1.10E-01 |
| PAPOLG      | 0.0610  | 2.41E-01 | 3.66E-01 |
| PAPPA2      | -0.1642 | 1.50E-03 | 6.05E-03 |
| PAPPA       | -0.0891 | 8.65E-02 | 1.66E-01 |
| PAPSS1      | 0.1578  | 2.30E-03 | 8.66E-03 |
| PAPSS2      | -0.2146 | 3.08E-05 | 2.24E-04 |
| PAQR3       | -0.0274 | 5.98E-01 | 7.12E-01 |
| PAQR4       | 0.3365  | 2.86E-11 | 9.44E-10 |
| PAQR5       | 0.1681  | 1.15E-03 | 4.84E-03 |
| PAQR6       | 0.2160  | 2.72E-05 | 2.02E-04 |
| PAQR7       | 0.0189  | 7.17E-01 | 8.07E-01 |
| PAQR8       | 0.0833  | 1.09E-01 | 1.99E-01 |
| PAQR9       | 0.0481  | 3.56E-01 | 4.88E-01 |
| PAR-SN      | 0.0830  | 1.10E-01 | 2.01E-01 |
| PAR1        | 0.1178  | 2.32E-02 | 5.80E-02 |
| PAR4        | -0.0803 | 1.23E-01 | 2.18E-01 |

|        |         |          |          |
|--------|---------|----------|----------|
| PAR5   | 0.0192  | 7.13E-01 | 8.04E-01 |
| PARD3B | -0.0732 | 1.59E-01 | 2.65E-01 |
| PARD3  | 0.2051  | 6.93E-05 | 4.47E-04 |
| PARD6A | -0.0212 | 6.84E-01 | 7.81E-01 |
| PARD6B | 0.1387  | 7.46E-03 | 2.29E-02 |
| PARD6G | 0.2132  | 3.46E-05 | 2.48E-04 |
| PARG   | 0.1158  | 2.57E-02 | 6.31E-02 |
| PARK2  | -0.1292 | 1.28E-02 | 3.57E-02 |
| PARK7  | -0.1113 | 3.21E-02 | 7.55E-02 |
| PARL   | 0.0031  | 9.52E-01 | 9.70E-01 |
| PARM1  | -0.0219 | 6.74E-01 | 7.73E-01 |
| PARN   | 0.0247  | 6.36E-01 | 7.43E-01 |
| PARP10 | -0.0537 | 3.02E-01 | 4.31E-01 |
| PARP11 | -0.0924 | 7.54E-02 | 1.49E-01 |
| PARP12 | 0.0852  | 1.01E-01 | 1.87E-01 |
| PARP14 | 0.0173  | 7.39E-01 | 8.24E-01 |
| PARP15 | 0.0263  | 6.14E-01 | 7.24E-01 |
| PARP16 | -0.0632 | 2.24E-01 | 3.46E-01 |
| PARP1  | 0.2877  | 1.68E-08 | 2.96E-07 |
| PARP2  | 0.2686  | 1.49E-07 | 2.08E-06 |
| PARP3  | -0.1464 | 4.71E-03 | 1.57E-02 |
| PARP4  | -0.0391 | 4.53E-01 | 5.84E-01 |
| PARP6  | -0.0977 | 6.02E-02 | 1.24E-01 |
| PARP8  | -0.0199 | 7.02E-01 | 7.95E-01 |
| PARP9  | -0.1041 | 4.50E-02 | 9.90E-02 |
| PARS2  | 0.1552  | 2.72E-03 | 9.95E-03 |
| PART1  | -0.0039 | 9.41E-01 | 9.64E-01 |
| PARVA  | -0.0954 | 6.63E-02 | 1.34E-01 |
| PARVB  | -0.0304 | 5.60E-01 | 6.78E-01 |
| PARVG  | -0.0358 | 4.92E-01 | 6.19E-01 |
| PASD1  | 0.1108  | 3.29E-02 | 7.70E-02 |
| PASK   | 0.3096  | 1.11E-09 | 2.60E-08 |
| PATE1  | -0.0358 | 4.91E-01 | 6.18E-01 |
| PATE2  | 0.1455  | 4.98E-03 | 1.64E-02 |
| PATE3  | -0.0151 | 7.72E-01 | 8.47E-01 |
| PATE4  | 0.0733  | 1.59E-01 | 2.65E-01 |
| PATL1  | -0.0376 | 4.70E-01 | 6.00E-01 |
| PATL2  | -0.0230 | 6.59E-01 | 7.60E-01 |
| PATZ1  | 0.1627  | 1.66E-03 | 6.60E-03 |
| PAWR   | -0.0506 | 3.31E-01 | 4.62E-01 |
| PAX1   | 0.0181  | 7.28E-01 | 8.15E-01 |
| PAX2   | -0.0579 | 2.66E-01 | 3.93E-01 |
| PAX3   | 0.1353  | 9.08E-03 | 2.71E-02 |
| PAX4   | 0.0008  | 9.87E-01 | 9.92E-01 |



|         |         |          |          |
|---------|---------|----------|----------|
| PAX5    | -0.0368 | 4.80E-01 | 6.09E-01 |
| PAX6    | 0.1741  | 7.57E-04 | 3.39E-03 |
| PAX7    | -0.0025 | 9.62E-01 | 9.76E-01 |
| PAX8    | 0.1416  | 6.29E-03 | 1.99E-02 |
| PAX9    | 0.0393  | 4.51E-01 | 5.82E-01 |
| PAXIP1  | 0.1726  | 8.42E-04 | 3.71E-03 |
| PBK     | 0.3783  | 4.58E-14 | 2.61E-12 |
| PBLD    | -0.2252 | 1.19E-05 | 9.80E-05 |
| PBOV1   | 0.0799  | 1.24E-01 | 2.20E-01 |
| PBRM1   | 0.0593  | 2.54E-01 | 3.80E-01 |
| PBX1    | -0.0853 | 1.01E-01 | 1.87E-01 |
| PBX2    | 0.1317  | 1.11E-02 | 3.18E-02 |
| PBX3    | 0.1218  | 1.89E-02 | 4.91E-02 |
| PBX4    | 0.0529  | 3.10E-01 | 4.39E-01 |
| PBXIP1  | 0.2102  | 4.49E-05 | 3.09E-04 |
| PCA3    | -0.0986 | 5.78E-02 | 1.21E-01 |
| PCBD1   | -0.2421 | 2.38E-06 | 2.42E-05 |
| PCBD2   | -0.1266 | 1.47E-02 | 4.00E-02 |
| PCBP1   | -0.0541 | 2.98E-01 | 4.28E-01 |
| PCBP2   | 0.0490  | 3.47E-01 | 4.79E-01 |
| PCBP3   | -0.0690 | 1.85E-01 | 2.98E-01 |
| PCBP4   | 0.0804  | 1.22E-01 | 2.17E-01 |
| PCCA    | -0.2356 | 4.49E-06 | 4.24E-05 |
| PCCB    | -0.2592 | 4.14E-07 | 5.19E-06 |
| PCDH10  | -0.0888 | 8.76E-02 | 1.67E-01 |
| PCDH11X | -0.0101 | 8.46E-01 | 8.99E-01 |
| PCDH11Y | -0.0665 | 2.01E-01 | 3.18E-01 |
| PCDH12  | -0.1832 | 3.89E-04 | 1.94E-03 |
| PCDH15  | 0.0823  | 1.14E-01 | 2.06E-01 |
| PCDH17  | -0.1040 | 4.52E-02 | 9.93E-02 |
| PCDH18  | -0.0661 | 2.04E-01 | 3.22E-01 |
| PCDH19  | 0.0357  | 4.93E-01 | 6.20E-01 |
| PCDH1   | -0.2081 | 5.35E-05 | 3.59E-04 |
| PCDH20  | -0.0705 | 1.75E-01 | 2.86E-01 |
| PCDH7   | -0.1286 | 1.32E-02 | 3.67E-02 |
| PCDH8   | 0.0998  | 5.49E-02 | 1.16E-01 |
| PCDH9   | -0.0389 | 4.54E-01 | 5.85E-01 |
| PCDHA10 | -0.1420 | 6.15E-03 | 1.95E-02 |
| PCDHA11 | -0.0756 | 1.46E-01 | 2.49E-01 |
| PCDHA12 | -0.1096 | 3.48E-02 | 8.07E-02 |
| PCDHA13 | -0.1216 | 1.92E-02 | 4.97E-02 |
| PCDHA1  | 0.0833  | 1.09E-01 | 1.99E-01 |
| PCDHA2  | 0.0553  | 2.88E-01 | 4.17E-01 |
| PCDHA3  | 0.0599  | 2.50E-01 | 3.75E-01 |

|          |         |          |          |
|----------|---------|----------|----------|
| PCDHA4   | -0.0326 | 5.31E-01 | 6.54E-01 |
| PCDHA5   | 0.0217  | 6.76E-01 | 7.75E-01 |
| PCDHA6   | -0.0062 | 9.06E-01 | 9.41E-01 |
| PCDHA7   | -0.0468 | 3.68E-01 | 5.01E-01 |
| PCDHA8   | 0.0280  | 5.90E-01 | 7.05E-01 |
| PCDHA9   | 0.0187  | 7.19E-01 | 8.09E-01 |
| PCDHAC1  | -0.1099 | 3.44E-02 | 7.98E-02 |
| PCDHAC2  | -0.0544 | 2.96E-01 | 4.25E-01 |
| PCDHB10  | -0.0179 | 7.31E-01 | 8.18E-01 |
| PCDHB11  | -0.1048 | 4.37E-02 | 9.67E-02 |
| PCDHB12  | -0.0931 | 7.32E-02 | 1.45E-01 |
| PCDHB13  | -0.0865 | 9.63E-02 | 1.81E-01 |
| PCDHB14  | -0.1009 | 5.22E-02 | 1.11E-01 |
| PCDHB15  | -0.1056 | 4.20E-02 | 9.36E-02 |
| PCDHB16  | -0.0202 | 6.98E-01 | 7.91E-01 |
| PCDHB17  | -0.0397 | 4.46E-01 | 5.78E-01 |
| PCDHB18  | -0.0584 | 2.62E-01 | 3.88E-01 |
| PCDHB19P | -0.1033 | 4.67E-02 | 1.02E-01 |
| PCDHB1   | 0.1317  | 1.11E-02 | 3.19E-02 |
| PCDHB2   | 0.0468  | 3.68E-01 | 5.01E-01 |
| PCDHB3   | 0.0315  | 5.45E-01 | 6.66E-01 |
| PCDHB4   | -0.0928 | 7.41E-02 | 1.47E-01 |
| PCDHB5   | 0.0134  | 7.97E-01 | 8.66E-01 |
| PCDHB6   | -0.0181 | 7.28E-01 | 8.15E-01 |
| PCDHB7   | -0.0722 | 1.65E-01 | 2.73E-01 |
| PCDHB8   | -0.0400 | 4.42E-01 | 5.74E-01 |
| PCDHB9   | -0.0155 | 7.67E-01 | 8.43E-01 |
| PCDHGA10 | 0.0215  | 6.80E-01 | 7.78E-01 |
| PCDHGA11 | 0.0112  | 8.30E-01 | 8.89E-01 |
| PCDHGA12 | -0.1493 | 3.94E-03 | 1.36E-02 |
| PCDHGA1  | -0.0553 | 2.88E-01 | 4.17E-01 |
| PCDHGA2  | -0.1151 | 2.67E-02 | 6.50E-02 |
| PCDHGA3  | -0.0873 | 9.30E-02 | 1.76E-01 |
| PCDHGA4  | -0.0528 | 3.10E-01 | 4.40E-01 |
| PCDHGA5  | -0.0423 | 4.17E-01 | 5.50E-01 |
| PCDHGA6  | 0.0187  | 7.19E-01 | 8.09E-01 |
| PCDHGA7  | -0.0244 | 6.39E-01 | 7.45E-01 |
| PCDHGA8  | 0.0667  | 2.00E-01 | 3.17E-01 |
| PCDHGA9  | -0.0862 | 9.73E-02 | 1.82E-01 |
| PCDHGB1  | -0.0803 | 1.23E-01 | 2.18E-01 |
| PCDHGB2  | -0.1133 | 2.91E-02 | 6.97E-02 |
| PCDHGB3  | -0.0507 | 3.30E-01 | 4.61E-01 |
| PCDHGB4  | 0.0138  | 7.92E-01 | 8.62E-01 |
| PCDHGB5  | -0.0748 | 1.50E-01 | 2.54E-01 |

|          |         |          |          |
|----------|---------|----------|----------|
| PCDHGB6  | -0.0063 | 9.04E-01 | 9.40E-01 |
| PCDHGB7  | -0.1645 | 1.48E-03 | 5.97E-03 |
| PCDHGB8P | 0.0905  | 8.18E-02 | 1.59E-01 |
| PCDHGC3  | -0.1645 | 1.47E-03 | 5.95E-03 |
| PCDHGC4  | 0.0484  | 3.52E-01 | 4.84E-01 |
| PCDHGC5  | 0.0131  | 8.02E-01 | 8.69E-01 |
| PCDP1    | 0.0730  | 1.61E-01 | 2.68E-01 |
| PCF11    | 0.1243  | 1.66E-02 | 4.42E-02 |
| PCGEM1   | 0.0239  | 6.47E-01 | 7.51E-01 |
| PCGF1    | 0.1798  | 5.02E-04 | 2.39E-03 |
| PCGF2    | 0.0741  | 1.54E-01 | 2.59E-01 |
| PCGF3    | 0.1615  | 1.81E-03 | 7.08E-03 |
| PCGF5    | -0.1619 | 1.76E-03 | 6.91E-03 |
| PCGF6    | -0.0423 | 4.17E-01 | 5.50E-01 |
| PCID2    | 0.2925  | 9.36E-09 | 1.75E-07 |
| PCIF1    | 0.1425  | 5.95E-03 | 1.90E-02 |
| PCK1     | -0.2627 | 2.83E-07 | 3.71E-06 |
| PCK2     | -0.2614 | 3.27E-07 | 4.22E-06 |
| PCLO     | 0.1151  | 2.66E-02 | 6.48E-02 |
| PCM1     | 0.0201  | 7.00E-01 | 7.93E-01 |
| PCMT1    | 0.1689  | 1.09E-03 | 4.64E-03 |
| PCMTD1   | -0.1845 | 3.54E-04 | 1.79E-03 |
| PCMTD2   | 0.0325  | 5.32E-01 | 6.55E-01 |
| PCNAP1   | -0.0340 | 5.13E-01 | 6.38E-01 |
| PCNA     | 0.3970  | 1.88E-15 | 1.40E-13 |
| PCNP     | 0.1317  | 1.11E-02 | 3.19E-02 |
| PCNT     | 0.1223  | 1.85E-02 | 4.82E-02 |
| PCNXL2   | 0.1904  | 2.24E-04 | 1.22E-03 |
| PCNXL3   | 0.2035  | 7.89E-05 | 4.98E-04 |
| PCNX     | -0.1517 | 3.41E-03 | 1.20E-02 |
| PCOLCE2  | 0.0626  | 2.29E-01 | 3.52E-01 |
| PCOLCE   | -0.0908 | 8.07E-02 | 1.57E-01 |
| PCOTH    | 0.1270  | 1.44E-02 | 3.94E-02 |
| PCP2     | 0.2036  | 7.81E-05 | 4.94E-04 |
| PCP4L1   | -0.0396 | 4.46E-01 | 5.78E-01 |
| PCP4     | 0.0374  | 4.72E-01 | 6.01E-01 |
| PCSK1N   | 0.0722  | 1.65E-01 | 2.73E-01 |
| PCSK1    | -0.1204 | 2.03E-02 | 5.20E-02 |
| PCSK2    | -0.0574 | 2.70E-01 | 3.98E-01 |
| PCSK4    | -0.1112 | 3.22E-02 | 7.57E-02 |
| PCSK5    | -0.0185 | 7.23E-01 | 8.12E-01 |
| PCSK6    | -0.2558 | 5.94E-07 | 7.11E-06 |
| PCSK7    | 0.1051  | 4.30E-02 | 9.55E-02 |
| PCSK9    | 0.0838  | 1.07E-01 | 1.96E-01 |

|          |         |          |          |
|----------|---------|----------|----------|
| PCTP     | -0.2402 | 2.86E-06 | 2.84E-05 |
| PCYOX1L  | 0.1221  | 1.86E-02 | 4.85E-02 |
| PCYOX1   | -0.2629 | 2.77E-07 | 3.64E-06 |
| PCYT1A   | -0.1625 | 1.69E-03 | 6.68E-03 |
| PCYT1B   | 0.1123  | 3.05E-02 | 7.25E-02 |
| PCYT2    | -0.0550 | 2.91E-01 | 4.20E-01 |
| PC       | -0.2935 | 8.36E-09 | 1.58E-07 |
| PDAP1    | -0.0032 | 9.51E-01 | 9.70E-01 |
| PDCD10   | 0.1793  | 5.18E-04 | 2.45E-03 |
| PDCD11   | 0.1067  | 3.99E-02 | 9.00E-02 |
| PDCD1LG2 | -0.1296 | 1.25E-02 | 3.50E-02 |
| PDCD1    | 0.0611  | 2.41E-01 | 3.65E-01 |
| PDCD2L   | 0.1524  | 3.26E-03 | 1.16E-02 |
| PDCD2    | 0.2214  | 1.68E-05 | 1.33E-04 |
| PDCD4    | -0.0633 | 2.24E-01 | 3.45E-01 |
| PDCD5    | 0.2340  | 5.25E-06 | 4.84E-05 |
| PDCD6IP  | -0.0990 | 5.68E-02 | 1.19E-01 |
| PDCD6    | 0.1038  | 4.57E-02 | 1.00E-01 |
| PDCD7    | 0.1674  | 1.21E-03 | 5.04E-03 |
| PDCL2    | 0.1480  | 4.28E-03 | 1.45E-02 |
| PDCL3    | 0.1912  | 2.11E-04 | 1.15E-03 |
| PDCL     | 0.2415  | 2.52E-06 | 2.54E-05 |
| PDC      | 0.0620  | 2.33E-01 | 3.56E-01 |
| PDDC1    | -0.0402 | 4.40E-01 | 5.72E-01 |
| PDE10A   | -0.1779 | 5.76E-04 | 2.68E-03 |
| PDE11A   | -0.2176 | 2.36E-05 | 1.79E-04 |
| PDE12    | -0.0926 | 7.49E-02 | 1.48E-01 |
| PDE1A    | -0.0418 | 4.22E-01 | 5.55E-01 |
| PDE1B    | -0.1124 | 3.05E-02 | 7.23E-02 |
| PDE1C    | -0.1268 | 1.45E-02 | 3.96E-02 |
| PDE2A    | -0.3298 | 7.30E-11 | 2.21E-09 |
| PDE3A    | -0.1384 | 7.60E-03 | 2.33E-02 |
| PDE3B    | -0.1630 | 1.63E-03 | 6.49E-03 |
| PDE4A    | 0.0640  | 2.19E-01 | 3.39E-01 |
| PDE4B    | -0.1107 | 3.30E-02 | 7.72E-02 |
| PDE4C    | 0.1173  | 2.39E-02 | 5.93E-02 |
| PDE4DIP  | 0.0291  | 5.76E-01 | 6.93E-01 |
| PDE4D    | -0.1633 | 1.60E-03 | 6.39E-03 |
| PDE5A    | -0.0409 | 4.32E-01 | 5.64E-01 |
| PDE6A    | 0.0673  | 1.96E-01 | 3.11E-01 |
| PDE6B    | 0.0249  | 6.32E-01 | 7.40E-01 |
| PDE6C    | 0.0017  | 9.74E-01 | 9.84E-01 |
| PDE6D    | 0.1651  | 1.41E-03 | 5.75E-03 |
| PDE6G    | -0.1254 | 1.57E-02 | 4.21E-02 |

|        |         |          |          |
|--------|---------|----------|----------|
| PDE6H  | 0.0683  | 1.89E-01 | 3.03E-01 |
| PDE7A  | 0.3039  | 2.30E-09 | 5.00E-08 |
| PDE7B  | -0.2088 | 5.07E-05 | 3.42E-04 |
| PDE8A  | -0.1442 | 5.39E-03 | 1.76E-02 |
| PDE8B  | -0.0927 | 7.46E-02 | 1.48E-01 |
| PDE9A  | 0.0978  | 5.97E-02 | 1.24E-01 |
| PDF    | -0.2520 | 8.76E-07 | 1.01E-05 |
| PDGFA  | 0.0182  | 7.27E-01 | 8.14E-01 |
| PDGFB  | -0.0371 | 4.76E-01 | 6.05E-01 |
| PDGFC  | -0.0515 | 3.22E-01 | 4.53E-01 |
| PDGFD  | -0.1180 | 2.30E-02 | 5.76E-02 |
| PDGFRA | -0.0614 | 2.38E-01 | 3.62E-01 |
| PDGFRB | -0.1013 | 5.12E-02 | 1.10E-01 |
| PDGFRL | 0.1464  | 4.71E-03 | 1.57E-02 |
| PDHA1  | -0.1644 | 1.49E-03 | 6.01E-03 |
| PDHA2  | 0.1195  | 2.13E-02 | 5.40E-02 |
| PDHB   | -0.1576 | 2.33E-03 | 8.74E-03 |
| PDHX   | -0.2034 | 7.95E-05 | 5.01E-04 |
| PDIA2  | 0.1441  | 5.41E-03 | 1.76E-02 |
| PDIA3P | 0.0277  | 5.95E-01 | 7.09E-01 |
| PDIA3  | 0.0103  | 8.43E-01 | 8.98E-01 |
| PDIA4  | -0.1145 | 2.74E-02 | 6.64E-02 |
| PDIA5  | -0.1169 | 2.43E-02 | 6.02E-02 |
| PDIA6  | 0.1147  | 2.72E-02 | 6.60E-02 |
| PDIK1L | -0.0069 | 8.95E-01 | 9.33E-01 |
| PDILT  | -0.0127 | 8.07E-01 | 8.73E-01 |
| PDK1   | -0.0728 | 1.62E-01 | 2.68E-01 |
| PDK2   | -0.1550 | 2.76E-03 | 1.01E-02 |
| PDK3   | 0.0314  | 5.46E-01 | 6.67E-01 |
| PDK4   | -0.2965 | 5.77E-09 | 1.14E-07 |
| PDLIM1 | -0.1399 | 6.98E-03 | 2.17E-02 |
| PDLIM2 | -0.2390 | 3.24E-06 | 3.18E-05 |
| PDLIM3 | -0.0175 | 7.37E-01 | 8.22E-01 |
| PDLIM4 | -0.0386 | 4.59E-01 | 5.90E-01 |
| PDLIM5 | -0.1866 | 3.02E-04 | 1.57E-03 |
| PDLIM7 | 0.1085  | 3.68E-02 | 8.43E-02 |
| PDP1   | 0.1336  | 9.97E-03 | 2.92E-02 |
| PDP2   | -0.2070 | 5.90E-05 | 3.90E-04 |
| PDPK1  | -0.0075 | 8.85E-01 | 9.27E-01 |
| PDPN   | -0.0393 | 4.50E-01 | 5.82E-01 |
| PDPR   | -0.0694 | 1.83E-01 | 2.95E-01 |
| PDRG1  | 0.1830  | 3.96E-04 | 1.96E-03 |
| PDS5A  | 0.1270  | 1.44E-02 | 3.94E-02 |
| PDS5B  | 0.0639  | 2.19E-01 | 3.40E-01 |

|          |         |          |          |
|----------|---------|----------|----------|
| PDSS1    | 0.2108  | 4.25E-05 | 2.95E-04 |
| PDSS2    | -0.1831 | 3.94E-04 | 1.96E-03 |
| PDX1     | 0.2215  | 1.67E-05 | 1.32E-04 |
| PDXDC1   | -0.1629 | 1.64E-03 | 6.55E-03 |
| PDXDC2   | 0.1103  | 3.38E-02 | 7.87E-02 |
| PDXK     | 0.0083  | 8.73E-01 | 9.18E-01 |
| PDXP     | -0.1110 | 3.26E-02 | 7.65E-02 |
| PDYN     | 0.0691  | 1.84E-01 | 2.97E-01 |
| PDZD11   | 0.2010  | 9.65E-05 | 5.92E-04 |
| PDZD2    | -0.0477 | 3.60E-01 | 4.92E-01 |
| PDZD3    | 0.0598  | 2.50E-01 | 3.76E-01 |
| PDZD4    | -0.1342 | 9.66E-03 | 2.85E-02 |
| PDZD7    | 0.0780  | 1.34E-01 | 2.32E-01 |
| PDZD8    | -0.0857 | 9.92E-02 | 1.85E-01 |
| PDZD9    | 0.0551  | 2.90E-01 | 4.19E-01 |
| PDZK1IP1 | -0.0800 | 1.24E-01 | 2.19E-01 |
| PDZK1P1  | 0.1519  | 3.36E-03 | 1.19E-02 |
| PDZK1    | 0.0926  | 7.48E-02 | 1.48E-01 |
| PDZRN3   | -0.1626 | 1.68E-03 | 6.65E-03 |
| PDZRN4   | -0.1740 | 7.64E-04 | 3.41E-03 |
| PEA15    | 0.4015  | 8.40E-16 | 7.00E-14 |
| PEAR1    | -0.1365 | 8.46E-03 | 2.55E-02 |
| PEBP1    | -0.2813 | 3.54E-08 | 5.73E-07 |
| PEBP4    | -0.2026 | 8.51E-05 | 5.32E-04 |
| PECAM1   | -0.1437 | 5.57E-03 | 1.80E-02 |
| PECI     | -0.2185 | 2.19E-05 | 1.67E-04 |
| PECR     | -0.2353 | 4.62E-06 | 4.35E-05 |
| PEF1     | -0.1096 | 3.48E-02 | 8.07E-02 |
| PEG10    | 0.1481  | 4.25E-03 | 1.44E-02 |
| PEG3AS   | -0.0934 | 7.25E-02 | 1.44E-01 |
| PEG3     | 0.0738  | 1.56E-01 | 2.62E-01 |
| PELI1    | 0.1230  | 1.77E-02 | 4.66E-02 |
| PELI2    | -0.1080 | 3.76E-02 | 8.58E-02 |
| PELI3    | 0.0142  | 7.85E-01 | 8.57E-01 |
| PELO     | 0.0638  | 2.20E-01 | 3.40E-01 |
| PELP1    | 0.2081  | 5.38E-05 | 3.60E-04 |
| PEMT     | -0.2770 | 5.81E-08 | 8.92E-07 |
| PENK     | -0.0387 | 4.57E-01 | 5.88E-01 |
| PEPD     | -0.2149 | 2.98E-05 | 2.18E-04 |
| PER1     | -0.1403 | 6.78E-03 | 2.12E-02 |
| PER2     | 0.0124  | 8.12E-01 | 8.77E-01 |
| PER3     | 0.0250  | 6.31E-01 | 7.39E-01 |
| PER4     | 0.0725  | 1.64E-01 | 2.71E-01 |
| PERP     | 0.1124  | 3.04E-02 | 7.22E-02 |

|         |         |          |          |
|---------|---------|----------|----------|
| PES1    | 0.2281  | 9.10E-06 | 7.74E-05 |
| PET112L | -0.3675 | 2.65E-13 | 1.31E-11 |
| PEX10   | -0.1178 | 2.33E-02 | 5.81E-02 |
| PEX11A  | -0.1585 | 2.20E-03 | 8.33E-03 |
| PEX11B  | 0.3192  | 3.10E-10 | 8.31E-09 |
| PEX11G  | -0.3442 | 9.29E-12 | 3.35E-10 |
| PEX12   | -0.1803 | 4.82E-04 | 2.31E-03 |
| PEX13   | -0.3283 | 8.98E-11 | 2.65E-09 |
| PEX14   | -0.2201 | 1.89E-05 | 1.47E-04 |
| PEX16   | -0.0463 | 3.73E-01 | 5.06E-01 |
| PEX19   | 0.0727  | 1.62E-01 | 2.69E-01 |
| PEX1    | -0.1730 | 8.17E-04 | 3.61E-03 |
| PEX26   | -0.1430 | 5.80E-03 | 1.86E-02 |
| PEX2    | -0.0700 | 1.79E-01 | 2.90E-01 |
| PEX3    | -0.0826 | 1.12E-01 | 2.03E-01 |
| PEX5L   | 0.0784  | 1.32E-01 | 2.30E-01 |
| PEX5    | -0.1777 | 5.87E-04 | 2.72E-03 |
| PEX6    | -0.1150 | 2.68E-02 | 6.52E-02 |
| PEX7    | 0.0240  | 6.46E-01 | 7.50E-01 |
| PF4V1   | -0.0794 | 1.27E-01 | 2.23E-01 |
| PF4     | -0.0872 | 9.33E-02 | 1.76E-01 |
| PFAS    | 0.1167  | 2.45E-02 | 6.06E-02 |
| PFDN1   | 0.1540  | 2.94E-03 | 1.06E-02 |
| PFDN2   | 0.3475  | 5.71E-12 | 2.18E-10 |
| PFDN4   | 0.2696  | 1.34E-07 | 1.90E-06 |
| PFDN5   | 0.0368  | 4.80E-01 | 6.09E-01 |
| PFDN6   | 0.1404  | 6.76E-03 | 2.11E-02 |
| PFKFB1  | -0.1841 | 3.65E-04 | 1.84E-03 |
| PFKFB2  | 0.1794  | 5.18E-04 | 2.45E-03 |
| PFKFB3  | -0.0054 | 9.18E-01 | 9.48E-01 |
| PFKFB4  | 0.1904  | 2.24E-04 | 1.22E-03 |
| PFKL    | -0.0775 | 1.36E-01 | 2.36E-01 |
| PFKM    | -0.1562 | 2.55E-03 | 9.42E-03 |
| PFKP    | 0.0408  | 4.33E-01 | 5.65E-01 |
| PFN1    | 0.0088  | 8.65E-01 | 9.13E-01 |
| PFN2    | 0.0340  | 5.14E-01 | 6.38E-01 |
| PFN3    | 0.0215  | 6.80E-01 | 7.78E-01 |
| PFN4    | 0.1128  | 2.98E-02 | 7.10E-02 |
| PGA3    | 0.0197  | 7.05E-01 | 7.98E-01 |
| PGA4    | 0.0333  | 5.23E-01 | 6.47E-01 |
| PGA5    | 0.0508  | 3.29E-01 | 4.60E-01 |
| PGAM1   | -0.2436 | 2.05E-06 | 2.14E-05 |
| PGAM2   | 0.1301  | 1.22E-02 | 3.43E-02 |
| PGAM4   | -0.1207 | 2.01E-02 | 5.15E-02 |

|         |         |          |          |
|---------|---------|----------|----------|
| PGAM5   | -0.0977 | 6.01E-02 | 1.24E-01 |
| PGAP1   | 0.1138  | 2.84E-02 | 6.84E-02 |
| PGAP2   | 0.1323  | 1.07E-02 | 3.09E-02 |
| PGAP3   | -0.0443 | 3.94E-01 | 5.27E-01 |
| PGBD1   | 0.1897  | 2.37E-04 | 1.28E-03 |
| PGBD2   | 0.2087  | 5.11E-05 | 3.44E-04 |
| PGBD3   | 0.0511  | 3.26E-01 | 4.57E-01 |
| PGBD4   | -0.0072 | 8.90E-01 | 9.30E-01 |
| PGBD5   | 0.0171  | 7.43E-01 | 8.27E-01 |
| PGCP    | -0.0505 | 3.32E-01 | 4.63E-01 |
| PGC     | 0.2010  | 9.69E-05 | 5.93E-04 |
| PGD     | 0.0311  | 5.50E-01 | 6.70E-01 |
| PGF     | 0.0398  | 4.45E-01 | 5.77E-01 |
| PGGT1B  | -0.1490 | 4.02E-03 | 1.38E-02 |
| PGK1    | 0.0115  | 8.25E-01 | 8.85E-01 |
| PGK2    | 0.0658  | 2.06E-01 | 3.24E-01 |
| PGLS    | -0.1288 | 1.30E-02 | 3.63E-02 |
| PGLYRP1 | -0.0960 | 6.48E-02 | 1.32E-01 |
| PGLYRP2 | -0.0286 | 5.83E-01 | 6.99E-01 |
| PGLYRP3 | 0.0995  | 5.54E-02 | 1.17E-01 |
| PGLYRP4 | 0.1780  | 5.73E-04 | 2.67E-03 |
| PGM1    | -0.2908 | 1.16E-08 | 2.12E-07 |
| PGM2L1  | 0.0266  | 6.09E-01 | 7.21E-01 |
| PGM2    | -0.0142 | 7.85E-01 | 8.57E-01 |
| PGM3    | 0.1917  | 2.03E-04 | 1.12E-03 |
| PGM5P2  | -0.0789 | 1.29E-01 | 2.26E-01 |
| PGM5    | -0.2438 | 2.02E-06 | 2.11E-05 |
| PGPEP1L | -0.0240 | 6.45E-01 | 7.50E-01 |
| PGPEP1  | -0.1166 | 2.47E-02 | 6.09E-02 |
| PGP     | 0.1474  | 4.45E-03 | 1.50E-02 |
| PGRMC1  | -0.2094 | 4.80E-05 | 3.27E-04 |
| PGRMC2  | -0.2673 | 1.73E-07 | 2.39E-06 |
| PGR     | -0.0711 | 1.72E-01 | 2.81E-01 |
| PGS1    | 0.3568  | 1.39E-12 | 6.02E-11 |
| PHACTR1 | 0.1068  | 3.98E-02 | 8.98E-02 |
| PHACTR2 | -0.0259 | 6.19E-01 | 7.28E-01 |
| PHACTR3 | -0.1479 | 4.31E-03 | 1.46E-02 |
| PHACTR4 | -0.0161 | 7.57E-01 | 8.37E-01 |
| PHAX    | -0.0137 | 7.92E-01 | 8.62E-01 |
| PHB2    | -0.1258 | 1.53E-02 | 4.14E-02 |
| PHB     | 0.0225  | 6.65E-01 | 7.65E-01 |
| PHC1    | 0.1377  | 7.93E-03 | 2.41E-02 |
| PHC2    | 0.0069  | 8.95E-01 | 9.33E-01 |
| PHC3    | 0.1418  | 6.22E-03 | 1.97E-02 |



|          |         |          |          |
|----------|---------|----------|----------|
| PHEX     | 0.1612  | 1.84E-03 | 7.20E-03 |
| PHF10    | 0.2012  | 9.53E-05 | 5.86E-04 |
| PHF11    | 0.0680  | 1.91E-01 | 3.06E-01 |
| PHF12    | 0.2747  | 7.58E-08 | 1.14E-06 |
| PHF13    | 0.0707  | 1.74E-01 | 2.85E-01 |
| PHF14    | 0.0148  | 7.77E-01 | 8.51E-01 |
| PHF15    | 0.1518  | 3.38E-03 | 1.19E-02 |
| PHF16    | 0.0777  | 1.35E-01 | 2.34E-01 |
| PHF17    | -0.1438 | 5.52E-03 | 1.79E-02 |
| PHF19    | 0.4170  | 4.88E-17 | 5.29E-15 |
| PHF1     | 0.1494  | 3.93E-03 | 1.36E-02 |
| PHF20L1  | -0.0354 | 4.96E-01 | 6.23E-01 |
| PHF20    | 0.1460  | 4.84E-03 | 1.61E-02 |
| PHF21A   | 0.1811  | 4.57E-04 | 2.21E-03 |
| PHF21B   | 0.0608  | 2.42E-01 | 3.67E-01 |
| PHF23    | 0.0139  | 7.89E-01 | 8.60E-01 |
| PHF2     | 0.1178  | 2.33E-02 | 5.82E-02 |
| PHF3     | 0.0367  | 4.81E-01 | 6.09E-01 |
| PHF5A    | 0.2333  | 5.61E-06 | 5.10E-05 |
| PHF6     | 0.2902  | 1.25E-08 | 2.26E-07 |
| PHF7     | -0.1051 | 4.30E-02 | 9.55E-02 |
| PHF8     | -0.0287 | 5.81E-01 | 6.97E-01 |
| PHGDH    | -0.0122 | 8.15E-01 | 8.78E-01 |
| PHGR1    | -0.0593 | 2.54E-01 | 3.80E-01 |
| PHIP     | 0.3284  | 8.89E-11 | 2.63E-09 |
| PHKA1    | -0.0102 | 8.45E-01 | 8.99E-01 |
| PHKA2    | 0.0802  | 1.23E-01 | 2.18E-01 |
| PHKB     | -0.2914 | 1.08E-08 | 1.99E-07 |
| PHKG1    | 0.0605  | 2.45E-01 | 3.69E-01 |
| PHKG2    | -0.0111 | 8.31E-01 | 8.89E-01 |
| PHLDA1   | -0.2718 | 1.05E-07 | 1.52E-06 |
| PHLDA2   | 0.0985  | 5.81E-02 | 1.21E-01 |
| PHLDA3   | -0.0866 | 9.58E-02 | 1.80E-01 |
| PHLDB1   | 0.0552  | 2.89E-01 | 4.18E-01 |
| PHLDB2   | -0.1838 | 3.71E-04 | 1.86E-03 |
| PHLDB3   | 0.0737  | 1.57E-01 | 2.62E-01 |
| PHLPP1   | -0.1274 | 1.40E-02 | 3.86E-02 |
| PHLPP2   | -0.0951 | 6.73E-02 | 1.36E-01 |
| PHOSPHO1 | -0.1168 | 2.44E-02 | 6.04E-02 |
| PHOSPHO2 | 0.2570  | 5.22E-07 | 6.35E-06 |
| PHOX2A   | 0.1856  | 3.24E-04 | 1.67E-03 |
| PHOX2B   | -0.0142 | 7.85E-01 | 8.57E-01 |
| PHPT1    | 0.2074  | 5.72E-05 | 3.80E-04 |
| PHRF1    | 0.0595  | 2.53E-01 | 3.78E-01 |

|         |         |          |          |
|---------|---------|----------|----------|
| PHTF1   | -0.0717 | 1.68E-01 | 2.77E-01 |
| PHTF2   | 0.1390  | 7.32E-03 | 2.26E-02 |
| PHYHD1  | -0.2679 | 1.62E-07 | 2.24E-06 |
| PHYHIPL | 0.0999  | 5.46E-02 | 1.15E-01 |
| PHYHIP  | -0.1397 | 7.05E-03 | 2.19E-02 |
| PHYH    | -0.2042 | 7.44E-05 | 4.75E-04 |
| PI15    | -0.0102 | 8.44E-01 | 8.98E-01 |
| PI16    | -0.1268 | 1.45E-02 | 3.97E-02 |
| PI3     | 0.1263  | 1.49E-02 | 4.06E-02 |
| PI4K2A  | -0.1538 | 2.97E-03 | 1.07E-02 |
| PI4K2B  | -0.1697 | 1.04E-03 | 4.43E-03 |
| PI4KAP1 | 0.3132  | 6.87E-10 | 1.68E-08 |
| PI4KAP2 | 0.1941  | 1.68E-04 | 9.50E-04 |
| PI4KA   | 0.1199  | 2.09E-02 | 5.31E-02 |
| PI4KB   | 0.6144  | 7.10E-40 | 2.02E-36 |
| PIAS1   | 0.0841  | 1.06E-01 | 1.94E-01 |
| PIAS2   | -0.0565 | 2.77E-01 | 4.06E-01 |
| PIAS3   | 0.3812  | 2.81E-14 | 1.66E-12 |
| PIAS4   | 0.0467  | 3.69E-01 | 5.02E-01 |
| PIBF1   | 0.1185  | 2.25E-02 | 5.65E-02 |
| PICALM  | -0.0018 | 9.73E-01 | 9.83E-01 |
| PICK1   | 0.0252  | 6.28E-01 | 7.36E-01 |
| PID1    | -0.1256 | 1.55E-02 | 4.17E-02 |
| PIF1    | 0.3867  | 1.11E-14 | 7.09E-13 |
| PIGA    | 0.2210  | 1.74E-05 | 1.37E-04 |
| PIGB    | -0.0009 | 9.86E-01 | 9.91E-01 |
| PIGC    | 0.5152  | 1.54E-26 | 1.02E-23 |
| PIGF    | 0.0580  | 2.65E-01 | 3.92E-01 |
| PIGG    | 0.1201  | 2.07E-02 | 5.28E-02 |
| PIGH    | -0.0272 | 6.01E-01 | 7.14E-01 |
| PIGK    | -0.0785 | 1.31E-01 | 2.29E-01 |
| PIGL    | -0.0858 | 9.91E-02 | 1.84E-01 |
| PIGM    | 0.3496  | 4.20E-12 | 1.65E-10 |
| PIGN    | 0.0147  | 7.78E-01 | 8.52E-01 |
| PIGO    | -0.0049 | 9.24E-01 | 9.52E-01 |
| PIGP    | -0.1488 | 4.06E-03 | 1.39E-02 |
| PIGQ    | -0.1470 | 4.55E-03 | 1.53E-02 |
| PIGR    | -0.0375 | 4.72E-01 | 6.01E-01 |
| PIGS    | 0.3217  | 2.22E-10 | 6.13E-09 |
| PIGT    | 0.1594  | 2.07E-03 | 7.94E-03 |
| PIGU    | 0.1930  | 1.84E-04 | 1.03E-03 |
| PIGV    | -0.2665 | 1.88E-07 | 2.57E-06 |
| PIGW    | 0.0585  | 2.61E-01 | 3.87E-01 |
| PIGX    | 0.2544  | 6.83E-07 | 8.09E-06 |

|          |         |          |          |
|----------|---------|----------|----------|
| PIGY     | -0.1720 | 8.77E-04 | 3.84E-03 |
| PIGZ     | 0.2981  | 4.72E-09 | 9.50E-08 |
| PIH1D1   | 0.1024  | 4.87E-02 | 1.05E-01 |
| PIH1D2   | 0.1131  | 2.95E-02 | 7.04E-02 |
| PIK3AP1  | -0.0215 | 6.80E-01 | 7.77E-01 |
| PIK3C2A  | -0.0899 | 8.37E-02 | 1.61E-01 |
| PIK3C2B  | 0.0311  | 5.50E-01 | 6.70E-01 |
| PIK3C2G  | -0.1784 | 5.55E-04 | 2.60E-03 |
| PIK3C3   | 0.0033  | 9.49E-01 | 9.68E-01 |
| PIK3CA   | -0.0184 | 7.23E-01 | 8.12E-01 |
| PIK3CB   | -0.0396 | 4.47E-01 | 5.78E-01 |
| PIK3CD   | -0.0496 | 3.41E-01 | 4.72E-01 |
| PIK3CG   | -0.1087 | 3.63E-02 | 8.35E-02 |
| PIK3IP1  | -0.1053 | 4.28E-02 | 9.50E-02 |
| PIK3R1   | -0.1612 | 1.84E-03 | 7.17E-03 |
| PIK3R2   | 0.0609  | 2.42E-01 | 3.66E-01 |
| PIK3R3   | -0.2464 | 1.55E-06 | 1.67E-05 |
| PIK3R4   | -0.0897 | 8.44E-02 | 1.62E-01 |
| PIK3R5   | -0.1040 | 4.52E-02 | 9.94E-02 |
| PIK3R6   | 0.0908  | 8.07E-02 | 1.57E-01 |
| PIKFYVE  | 0.0243  | 6.41E-01 | 7.47E-01 |
| PILRA    | -0.0123 | 8.14E-01 | 8.78E-01 |
| PILRB    | 0.1846  | 3.52E-04 | 1.78E-03 |
| PIM1     | -0.0164 | 7.53E-01 | 8.34E-01 |
| PIM2     | 0.1148  | 2.70E-02 | 6.56E-02 |
| PIM3     | -0.0673 | 1.96E-01 | 3.11E-01 |
| PIN1L    | 0.0999  | 5.46E-02 | 1.15E-01 |
| PIN1     | -0.0265 | 6.11E-01 | 7.22E-01 |
| PIN4     | 0.0649  | 2.12E-01 | 3.31E-01 |
| PINK1    | -0.4210 | 2.29E-17 | 2.74E-15 |
| PINX1    | 0.0495  | 3.42E-01 | 4.74E-01 |
| PION     | -0.0935 | 7.21E-02 | 1.44E-01 |
| PIP4K2A  | 0.0687  | 1.87E-01 | 3.00E-01 |
| PIP4K2B  | 0.2517  | 9.02E-07 | 1.03E-05 |
| PIP4K2C  | 0.0493  | 3.43E-01 | 4.75E-01 |
| PIP5K1A  | 0.3889  | 7.58E-15 | 5.00E-13 |
| PIP5K1B  | -0.0242 | 6.42E-01 | 7.47E-01 |
| PIP5K1C  | 0.0557  | 2.85E-01 | 4.14E-01 |
| PIP5K1P1 | 0.2255  | 1.15E-05 | 9.51E-05 |
| PIP5KL1  | 0.2195  | 2.00E-05 | 1.54E-04 |
| PIPOX    | -0.1399 | 6.96E-03 | 2.17E-02 |
| PIPSL    | 0.4383  | 7.52E-19 | 1.39E-16 |
| PIP      | -0.0284 | 5.85E-01 | 7.01E-01 |
| PIRT     | -0.0021 | 9.68E-01 | 9.80E-01 |

|         |         |          |          |
|---------|---------|----------|----------|
| PIR     | 0.0903  | 8.23E-02 | 1.59E-01 |
| PISD    | 0.0754  | 1.47E-01 | 2.50E-01 |
| PITPNA  | -0.1871 | 2.91E-04 | 1.52E-03 |
| PITPNB  | -0.0411 | 4.30E-01 | 5.62E-01 |
| PITPNC1 | -0.0754 | 1.47E-01 | 2.50E-01 |
| PITPNM1 | -0.0378 | 4.68E-01 | 5.97E-01 |
| PITPNM2 | -0.0855 | 1.00E-01 | 1.86E-01 |
| PITPNM3 | -0.0823 | 1.14E-01 | 2.06E-01 |
| PITRM1  | -0.0326 | 5.32E-01 | 6.54E-01 |
| PITX1   | 0.1885  | 2.61E-04 | 1.38E-03 |
| PITX2   | 0.0785  | 1.31E-01 | 2.29E-01 |
| PITX3   | 0.0820  | 1.15E-01 | 2.07E-01 |
| PIWIL1  | 0.0483  | 3.53E-01 | 4.85E-01 |
| PIWIL2  | -0.0799 | 1.24E-01 | 2.20E-01 |
| PIWIL3  | 0.1771  | 6.11E-04 | 2.81E-03 |
| PIWIL4  | 0.2542  | 7.01E-07 | 8.24E-06 |
| PJA1    | 0.1591  | 2.11E-03 | 8.07E-03 |
| PJA2    | -0.1752 | 6.98E-04 | 3.16E-03 |
| PKD1L1  | 0.0581  | 2.65E-01 | 3.92E-01 |
| PKD1L2  | 0.0713  | 1.70E-01 | 2.80E-01 |
| PKD1L3  | -0.1261 | 1.51E-02 | 4.08E-02 |
| PKD1    | 0.1679  | 1.17E-03 | 4.92E-03 |
| PKD2L1  | -0.0131 | 8.01E-01 | 8.69E-01 |
| PKD2L2  | 0.0530  | 3.09E-01 | 4.39E-01 |
| PKD2    | -0.0555 | 2.87E-01 | 4.16E-01 |
| PKDCC   | 0.1946  | 1.63E-04 | 9.23E-04 |
| PKDREJ  | 0.0032  | 9.50E-01 | 9.69E-01 |
| PKHD1L1 | 0.0016  | 9.75E-01 | 9.84E-01 |
| PKHD1   | -0.0400 | 4.42E-01 | 5.74E-01 |
| PKIA    | 0.1545  | 2.84E-03 | 1.03E-02 |
| PKIB    | 0.0751  | 1.49E-01 | 2.52E-01 |
| PKIG    | -0.1826 | 4.08E-04 | 2.01E-03 |
| PKLR    | -0.0301 | 5.64E-01 | 6.82E-01 |
| PKM2    | 0.2112  | 4.12E-05 | 2.87E-04 |
| PKMYT1  | 0.3666  | 3.01E-13 | 1.48E-11 |
| PKN1    | 0.1509  | 3.58E-03 | 1.25E-02 |
| PKN2    | 0.0635  | 2.23E-01 | 3.44E-01 |
| PKN3    | 0.2445  | 1.87E-06 | 1.98E-05 |
| PKNOX1  | 0.4147  | 7.51E-17 | 7.84E-15 |
| PKNOX2  | -0.0356 | 4.94E-01 | 6.21E-01 |
| PKP1    | -0.0468 | 3.68E-01 | 5.01E-01 |
| PKP2    | -0.1229 | 1.79E-02 | 4.69E-02 |
| PKP3    | 0.0796  | 1.26E-01 | 2.22E-01 |
| PKP4    | 0.0207  | 6.91E-01 | 7.86E-01 |

|          |         |          |          |
|----------|---------|----------|----------|
| PL-5283  | -0.0683 | 1.90E-01 | 3.03E-01 |
| PLA1A    | -0.0669 | 1.99E-01 | 3.15E-01 |
| PLA2G10  | 0.1435  | 5.62E-03 | 1.81E-02 |
| PLA2G12A | -0.2748 | 7.45E-08 | 1.12E-06 |
| PLA2G12B | -0.0576 | 2.69E-01 | 3.96E-01 |
| PLA2G15  | -0.1614 | 1.82E-03 | 7.10E-03 |
| PLA2G16  | -0.2155 | 2.85E-05 | 2.10E-04 |
| PLA2G1B  | 0.1001  | 5.41E-02 | 1.14E-01 |
| PLA2G2A  | -0.0716 | 1.69E-01 | 2.78E-01 |
| PLA2G2C  | 0.0435  | 4.04E-01 | 5.37E-01 |
| PLA2G2D  | -0.0232 | 6.56E-01 | 7.58E-01 |
| PLA2G2E  | -0.0010 | 9.85E-01 | 9.90E-01 |
| PLA2G2F  | -0.0094 | 8.57E-01 | 9.08E-01 |
| PLA2G3   | 0.0514  | 3.23E-01 | 4.54E-01 |
| PLA2G4A  | -0.0967 | 6.28E-02 | 1.29E-01 |
| PLA2G4C  | 0.0013  | 9.80E-01 | 9.87E-01 |
| PLA2G4D  | 0.2026  | 8.47E-05 | 5.30E-04 |
| PLA2G4E  | 0.1328  | 1.04E-02 | 3.02E-02 |
| PLA2G4F  | 0.1496  | 3.88E-03 | 1.34E-02 |
| PLA2G5   | -0.1612 | 1.84E-03 | 7.17E-03 |
| PLA2G6   | 0.1651  | 1.42E-03 | 5.75E-03 |
| PLA2G7   | -0.0130 | 8.03E-01 | 8.70E-01 |
| PLA2R1   | -0.0486 | 3.51E-01 | 4.83E-01 |
| PLAA     | 0.0203  | 6.97E-01 | 7.91E-01 |
| PLAC1    | 0.2119  | 3.87E-05 | 2.73E-04 |
| PLAC2    | 0.0336  | 5.19E-01 | 6.43E-01 |
| PLAC4    | 0.0307  | 5.56E-01 | 6.75E-01 |
| PLAC8L1  | 0.1327  | 1.05E-02 | 3.04E-02 |
| PLAC8    | 0.0023  | 9.65E-01 | 9.78E-01 |
| PLAC9    | -0.1343 | 9.60E-03 | 2.83E-02 |
| PLAG1    | 0.0660  | 2.04E-01 | 3.22E-01 |
| PLAGL1   | 0.0719  | 1.67E-01 | 2.75E-01 |
| PLAGL2   | 0.2880  | 1.62E-08 | 2.87E-07 |
| PLAT     | -0.1875 | 2.81E-04 | 1.47E-03 |
| PLAUR    | 0.0422  | 4.18E-01 | 5.50E-01 |
| PLAU     | -0.0330 | 5.27E-01 | 6.49E-01 |
| PLB1     | -0.1168 | 2.44E-02 | 6.04E-02 |
| PLBD1    | 0.1074  | 3.87E-02 | 8.79E-02 |
| PLBD2    | -0.1984 | 1.19E-04 | 7.09E-04 |
| PLCB1    | 0.1029  | 4.76E-02 | 1.04E-01 |
| PLCB2    | -0.0632 | 2.25E-01 | 3.46E-01 |
| PLCB3    | 0.2658  | 2.03E-07 | 2.75E-06 |
| PLCB4    | -0.0472 | 3.65E-01 | 4.98E-01 |
| PLCD1    | -0.0515 | 3.23E-01 | 4.53E-01 |

|          |         |          |          |
|----------|---------|----------|----------|
| PLCD3    | 0.1064  | 4.05E-02 | 9.11E-02 |
| PLCD4    | 0.2617  | 3.18E-07 | 4.10E-06 |
| PLCE1    | 0.0744  | 1.53E-01 | 2.57E-01 |
| PLCG1    | 0.0025  | 9.62E-01 | 9.76E-01 |
| PLCG2    | -0.1990 | 1.14E-04 | 6.83E-04 |
| PLCH1    | 0.1141  | 2.80E-02 | 6.75E-02 |
| PLCH2    | -0.0544 | 2.96E-01 | 4.25E-01 |
| PLCL1    | -0.0549 | 2.92E-01 | 4.21E-01 |
| PLCL2    | -0.1179 | 2.32E-02 | 5.79E-02 |
| PLCXD1   | 0.1513  | 3.50E-03 | 1.23E-02 |
| PLCXD2   | 0.0479  | 3.57E-01 | 4.89E-01 |
| PLCXD3   | -0.0962 | 6.42E-02 | 1.31E-01 |
| PLCZ1    | 0.0703  | 1.76E-01 | 2.87E-01 |
| PLD1     | 0.0080  | 8.78E-01 | 9.22E-01 |
| PLD2     | 0.0033  | 9.50E-01 | 9.69E-01 |
| PLD3     | -0.0750 | 1.50E-01 | 2.53E-01 |
| PLD4     | 0.0102  | 8.45E-01 | 8.99E-01 |
| PLD5     | 0.1489  | 4.04E-03 | 1.39E-02 |
| PLD6     | 0.1027  | 4.81E-02 | 1.04E-01 |
| PLDN     | -0.0858 | 9.90E-02 | 1.84E-01 |
| PLEC     | 0.0351  | 5.01E-01 | 6.27E-01 |
| PLEK2    | 0.1947  | 1.61E-04 | 9.14E-04 |
| PLEKHA1  | -0.0307 | 5.55E-01 | 6.75E-01 |
| PLEKHA2  | 0.0097  | 8.52E-01 | 9.04E-01 |
| PLEKHA3  | 0.0297  | 5.68E-01 | 6.86E-01 |
| PLEKHA4  | 0.0053  | 9.18E-01 | 9.48E-01 |
| PLEKHA5  | 0.0727  | 1.62E-01 | 2.69E-01 |
| PLEKHA6  | 0.1773  | 6.04E-04 | 2.79E-03 |
| PLEKHA7  | 0.0062  | 9.06E-01 | 9.41E-01 |
| PLEKHA8  | 0.0646  | 2.14E-01 | 3.34E-01 |
| PLEKHA9  | 0.1964  | 1.41E-04 | 8.17E-04 |
| PLEKHB1  | 0.1922  | 1.95E-04 | 1.08E-03 |
| PLEKHB2  | 0.0773  | 1.37E-01 | 2.37E-01 |
| PLEKHF1  | 0.0571  | 2.72E-01 | 4.00E-01 |
| PLEKHF2  | 0.1818  | 4.32E-04 | 2.10E-03 |
| PLEKHG1  | -0.1893 | 2.46E-04 | 1.31E-03 |
| PLEKHG2  | 0.1613  | 1.83E-03 | 7.15E-03 |
| PLEKHG3  | 0.0155  | 7.66E-01 | 8.42E-01 |
| PLEKHG4B | 0.2085  | 5.20E-05 | 3.50E-04 |
| PLEKHG4  | 0.1299  | 1.23E-02 | 3.46E-02 |
| PLEKHG5  | -0.0404 | 4.38E-01 | 5.70E-01 |
| PLEKHG6  | 0.2078  | 5.51E-05 | 3.68E-04 |
| PLEKHG7  | 0.0326  | 5.31E-01 | 6.54E-01 |
| PLEKHH1  | 0.1351  | 9.20E-03 | 2.74E-02 |

|          |         |          |          |
|----------|---------|----------|----------|
| PLEKHH2  | 0.1621  | 1.73E-03 | 6.81E-03 |
| PLEKHH3  | 0.1117  | 3.14E-02 | 7.42E-02 |
| PLEKHJ1  | -0.0583 | 2.62E-01 | 3.89E-01 |
| PLEKHM1P | 0.2556  | 6.06E-07 | 7.24E-06 |
| PLEKHM1  | 0.0854  | 1.01E-01 | 1.87E-01 |
| PLEKHM2  | -0.0575 | 2.69E-01 | 3.97E-01 |
| PLEKHM3  | -0.0644 | 2.16E-01 | 3.36E-01 |
| PLEKHN1  | 0.0541  | 2.98E-01 | 4.28E-01 |
| PLEKHO1  | 0.0446  | 3.92E-01 | 5.25E-01 |
| PLEKHO2  | -0.0295 | 5.71E-01 | 6.89E-01 |
| PLEK     | -0.0140 | 7.89E-01 | 8.60E-01 |
| PLGLA    | -0.2842 | 2.53E-08 | 4.25E-07 |
| PLGLB2   | -0.1600 | 1.99E-03 | 7.65E-03 |
| PLG      | -0.1798 | 5.00E-04 | 2.38E-03 |
| PLIN1    | -0.1885 | 2.60E-04 | 1.38E-03 |
| PLIN2    | -0.0752 | 1.49E-01 | 2.52E-01 |
| PLIN3    | 0.0557  | 2.84E-01 | 4.13E-01 |
| PLIN4    | -0.1182 | 2.28E-02 | 5.72E-02 |
| PLIN5    | -0.0924 | 7.53E-02 | 1.49E-01 |
| PLK1S1   | 0.1569  | 2.45E-03 | 9.10E-03 |
| PLK1     | 0.4214  | 2.11E-17 | 2.54E-15 |
| PLK2     | -0.1395 | 7.13E-03 | 2.21E-02 |
| PLK3     | -0.0639 | 2.20E-01 | 3.40E-01 |
| PLK4     | 0.3467  | 6.43E-12 | 2.42E-10 |
| PLK5P    | 0.1847  | 3.49E-04 | 1.77E-03 |
| PLLP     | 0.0129  | 8.05E-01 | 8.71E-01 |
| PLN      | -0.1697 | 1.03E-03 | 4.41E-03 |
| PLOD1    | -0.0702 | 1.77E-01 | 2.88E-01 |
| PLOD2    | 0.1022  | 4.93E-02 | 1.06E-01 |
| PLOD3    | 0.0476  | 3.61E-01 | 4.93E-01 |
| PLP1     | -0.1122 | 3.07E-02 | 7.29E-02 |
| PLP2     | 0.2971  | 5.38E-09 | 1.07E-07 |
| PLRG1    | -0.0432 | 4.07E-01 | 5.40E-01 |
| PLS1     | -0.0508 | 3.29E-01 | 4.60E-01 |
| PLS3     | -0.0764 | 1.42E-01 | 2.43E-01 |
| PLSCR1   | 0.0172  | 7.42E-01 | 8.26E-01 |
| PLSCR2   | 0.2147  | 3.05E-05 | 2.22E-04 |
| PLSCR3   | -0.0942 | 6.99E-02 | 1.40E-01 |
| PLSCR4   | -0.1971 | 1.33E-04 | 7.80E-04 |
| PLSCR5   | 0.0257  | 6.21E-01 | 7.31E-01 |
| PLTP     | -0.0567 | 2.76E-01 | 4.05E-01 |
| PLUNC    | 0.2841  | 2.56E-08 | 4.28E-07 |
| PLVAP    | -0.2151 | 2.95E-05 | 2.16E-04 |
| PLXDC1   | 0.0910  | 7.99E-02 | 1.56E-01 |

|          |         |          |          |
|----------|---------|----------|----------|
| PLXDC2   | -0.1291 | 1.28E-02 | 3.59E-02 |
| PLXNA1   | 0.2169  | 2.50E-05 | 1.88E-04 |
| PLXNA2   | 0.0443  | 3.95E-01 | 5.27E-01 |
| PLXNA3   | 0.1573  | 2.37E-03 | 8.86E-03 |
| PLXNA4   | -0.2364 | 4.14E-06 | 3.94E-05 |
| PLXNB1   | 0.0396  | 4.47E-01 | 5.79E-01 |
| PLXNB2   | -0.0376 | 4.71E-01 | 6.00E-01 |
| PLXNB3   | 0.1689  | 1.09E-03 | 4.62E-03 |
| PLXNC1   | -0.0066 | 8.99E-01 | 9.36E-01 |
| PLXND1   | 0.0115  | 8.25E-01 | 8.86E-01 |
| PM20D1   | -0.0338 | 5.16E-01 | 6.41E-01 |
| PM20D2   | 0.2415  | 2.53E-06 | 2.56E-05 |
| PMAIP1   | 0.1390  | 7.35E-03 | 2.27E-02 |
| PMCHL1   | 0.1065  | 4.03E-02 | 9.07E-02 |
| PMCHL2   | 0.0695  | 1.82E-01 | 2.94E-01 |
| PMCH     | 0.1793  | 5.20E-04 | 2.46E-03 |
| PMEPA1   | 0.0129  | 8.04E-01 | 8.70E-01 |
| PMF1     | 0.3757  | 6.99E-14 | 3.80E-12 |
| PMFBP1   | 0.0176  | 7.35E-01 | 8.21E-01 |
| PML      | 0.0292  | 5.75E-01 | 6.92E-01 |
| PMM1     | 0.0318  | 5.41E-01 | 6.62E-01 |
| PMM2     | -0.0130 | 8.02E-01 | 8.70E-01 |
| PMP22    | -0.0659 | 2.06E-01 | 3.23E-01 |
| PMP2     | -0.0559 | 2.83E-01 | 4.12E-01 |
| PMPCA    | -0.0620 | 2.34E-01 | 3.57E-01 |
| PMPCB    | -0.2088 | 5.06E-05 | 3.42E-04 |
| PMS1     | 0.3171  | 4.15E-10 | 1.08E-08 |
| PMS2CL   | 0.1582  | 2.24E-03 | 8.45E-03 |
| PMS2L11  | 0.1719  | 8.88E-04 | 3.88E-03 |
| PMS2L1   | -0.1329 | 1.04E-02 | 3.01E-02 |
| PMS2L2   | -0.2000 | 1.05E-04 | 6.34E-04 |
| PMS2L3   | 0.3185  | 3.43E-10 | 9.14E-09 |
| PMS2L4   | 0.1436  | 5.58E-03 | 1.80E-02 |
| PMS2L5   | -0.1384 | 7.59E-03 | 2.33E-02 |
| PMS2     | 0.0837  | 1.08E-01 | 1.97E-01 |
| PMVK     | 0.1695  | 1.05E-03 | 4.47E-03 |
| PNCK     | 0.1539  | 2.95E-03 | 1.06E-02 |
| PNKD     | -0.0005 | 9.92E-01 | 9.95E-01 |
| PNKP     | 0.0736  | 1.57E-01 | 2.63E-01 |
| PNLDC1   | 0.1331  | 1.03E-02 | 2.99E-02 |
| PNLIPRP1 | 0.0324  | 5.34E-01 | 6.56E-01 |
| PNLIPRP2 | 0.0605  | 2.45E-01 | 3.69E-01 |
| PNLIPRP3 | -0.0364 | 4.85E-01 | 6.13E-01 |
| PNLIP    | -0.0481 | 3.56E-01 | 4.88E-01 |



|         |         |          |          |
|---------|---------|----------|----------|
| PNMA1   | 0.1670  | 1.24E-03 | 5.18E-03 |
| PNMA2   | -0.0037 | 9.43E-01 | 9.65E-01 |
| PNMA3   | 0.0600  | 2.49E-01 | 3.74E-01 |
| PNMA5   | 0.0476  | 3.61E-01 | 4.93E-01 |
| PNMA6A  | -0.0395 | 4.48E-01 | 5.79E-01 |
| PNMAL1  | 0.0777  | 1.35E-01 | 2.34E-01 |
| PNMAL2  | -0.1259 | 1.52E-02 | 4.12E-02 |
| PNMT    | -0.0207 | 6.91E-01 | 7.86E-01 |
| PNN     | 0.1857  | 3.23E-04 | 1.66E-03 |
| PNO1    | 0.0935  | 7.22E-02 | 1.44E-01 |
| PNOC    | 0.0348  | 5.03E-01 | 6.29E-01 |
| PNPLA1  | 0.0745  | 1.52E-01 | 2.56E-01 |
| PNPLA2  | -0.1033 | 4.67E-02 | 1.02E-01 |
| PNPLA3  | -0.1078 | 3.79E-02 | 8.64E-02 |
| PNPLA4  | -0.3182 | 3.59E-10 | 9.50E-09 |
| PNPLA5  | -0.1648 | 1.45E-03 | 5.86E-03 |
| PNPLA6  | -0.0550 | 2.90E-01 | 4.19E-01 |
| PNPLA7  | -0.2852 | 2.26E-08 | 3.85E-07 |
| PNPLA8  | -0.2042 | 7.42E-05 | 4.74E-04 |
| PNPO    | -0.2840 | 2.59E-08 | 4.31E-07 |
| PNPT1   | 0.0639  | 2.20E-01 | 3.40E-01 |
| PNP     | 0.0368  | 4.80E-01 | 6.08E-01 |
| PNRC1   | 0.0036  | 9.44E-01 | 9.66E-01 |
| PNRC2   | -0.0082 | 8.75E-01 | 9.19E-01 |
| POC1A   | 0.2658  | 2.04E-07 | 2.76E-06 |
| POC1B   | 0.0788  | 1.30E-01 | 2.27E-01 |
| POC5    | 0.2741  | 8.12E-08 | 1.20E-06 |
| PODNL1  | -0.0363 | 4.86E-01 | 6.14E-01 |
| PODN    | -0.1338 | 9.90E-03 | 2.90E-02 |
| PODXL2  | 0.1131  | 2.94E-02 | 7.04E-02 |
| PODXL   | -0.0701 | 1.78E-01 | 2.89E-01 |
| POF1B   | 0.1731  | 8.14E-04 | 3.60E-03 |
| POFUT1  | -0.0237 | 6.49E-01 | 7.53E-01 |
| POFUT2  | 0.1291  | 1.28E-02 | 3.58E-02 |
| POGK    | 0.4868  | 1.80E-23 | 7.47E-21 |
| POGZ    | 0.5691  | 3.17E-33 | 3.94E-30 |
| POLA1   | 0.4065  | 3.41E-16 | 3.04E-14 |
| POLA2   | 0.3773  | 5.36E-14 | 3.00E-12 |
| POLB    | 0.0666  | 2.01E-01 | 3.17E-01 |
| POLD1   | 0.3911  | 5.24E-15 | 3.60E-13 |
| POLD2   | 0.0402  | 4.40E-01 | 5.71E-01 |
| POLD3   | 0.4099  | 1.82E-16 | 1.75E-14 |
| POLD4   | -0.2375 | 3.74E-06 | 3.61E-05 |
| POLDIP2 | -0.1013 | 5.11E-02 | 1.09E-01 |

|         |         |          |          |
|---------|---------|----------|----------|
| POLDIP3 | 0.1526  | 3.21E-03 | 1.14E-02 |
| POLE2   | 0.3605  | 7.97E-13 | 3.65E-11 |
| POLE3   | 0.3061  | 1.73E-09 | 3.92E-08 |
| POLE4   | 0.0301  | 5.63E-01 | 6.81E-01 |
| POLE    | 0.2411  | 2.62E-06 | 2.63E-05 |
| POLG2   | 0.4207  | 2.40E-17 | 2.85E-15 |
| POLG    | -0.1612 | 1.84E-03 | 7.19E-03 |
| POLH    | 0.1042  | 4.49E-02 | 9.89E-02 |
| POLI    | 0.0390  | 4.53E-01 | 5.84E-01 |
| POLK    | -0.0249 | 6.33E-01 | 7.40E-01 |
| POLL    | -0.0111 | 8.32E-01 | 8.90E-01 |
| POLM    | 0.1993  | 1.11E-04 | 6.64E-04 |
| POLN    | -0.1673 | 1.22E-03 | 5.09E-03 |
| POLQ    | 0.3929  | 3.83E-15 | 2.72E-13 |
| POLR1A  | 0.0231  | 6.58E-01 | 7.59E-01 |
| POLR1B  | 0.0160  | 7.59E-01 | 8.38E-01 |
| POLR1C  | 0.0566  | 2.77E-01 | 4.05E-01 |
| POLR1D  | 0.1255  | 1.56E-02 | 4.19E-02 |
| POLR1E  | -0.0019 | 9.71E-01 | 9.81E-01 |
| POLR2A  | 0.0082  | 8.75E-01 | 9.19E-01 |
| POLR2B  | 0.0742  | 1.54E-01 | 2.58E-01 |
| POLR2C  | -0.2621 | 3.04E-07 | 3.95E-06 |
| POLR2D  | 0.2711  | 1.14E-07 | 1.63E-06 |
| POLR2E  | -0.2033 | 7.99E-05 | 5.03E-04 |
| POLR2F  | 0.0807  | 1.21E-01 | 2.15E-01 |
| POLR2G  | 0.0891  | 8.66E-02 | 1.66E-01 |
| POLR2H  | 0.2089  | 5.03E-05 | 3.40E-04 |
| POLR2I  | 0.1059  | 4.16E-02 | 9.29E-02 |
| POLR2J2 | 0.0159  | 7.60E-01 | 8.39E-01 |
| POLR2J3 | 0.1407  | 6.63E-03 | 2.08E-02 |
| POLR2J4 | 0.2128  | 3.57E-05 | 2.55E-04 |
| POLR2J  | -0.0158 | 7.61E-01 | 8.39E-01 |
| POLR2K  | 0.1221  | 1.87E-02 | 4.86E-02 |
| POLR2L  | -0.0795 | 1.26E-01 | 2.22E-01 |
| POLR3A  | 0.0326  | 5.32E-01 | 6.54E-01 |
| POLR3B  | -0.0230 | 6.59E-01 | 7.60E-01 |
| POLR3C  | 0.5482  | 1.73E-30 | 1.82E-27 |
| POLR3D  | 0.0688  | 1.86E-01 | 2.99E-01 |
| POLR3E  | -0.0201 | 7.00E-01 | 7.93E-01 |
| POLR3F  | 0.3222  | 2.07E-10 | 5.72E-09 |
| POLR3GL | 0.1893  | 2.45E-04 | 1.31E-03 |
| POLR3G  | 0.0091  | 8.61E-01 | 9.10E-01 |
| POLR3H  | -0.0722 | 1.65E-01 | 2.73E-01 |
| POLR3K  | 0.1011  | 5.17E-02 | 1.10E-01 |

|            |         |          |          |
|------------|---------|----------|----------|
| POLRMT     | -0.0403 | 4.40E-01 | 5.71E-01 |
| POM121C    | 0.1363  | 8.57E-03 | 2.58E-02 |
| POM121L10P | 0.1860  | 3.16E-04 | 1.63E-03 |
| POM121L1P  | 0.0902  | 8.26E-02 | 1.60E-01 |
| POM121L2   | 0.0833  | 1.09E-01 | 1.99E-01 |
| POM121L4P  | 0.0025  | 9.62E-01 | 9.76E-01 |
| POM121L8P  | 0.0038  | 9.42E-01 | 9.64E-01 |
| POM121L9P  | -0.0665 | 2.01E-01 | 3.17E-01 |
| POM121     | 0.0934  | 7.23E-02 | 1.44E-01 |
| POMC       | -0.1181 | 2.29E-02 | 5.72E-02 |
| POMGNT1    | 0.0052  | 9.20E-01 | 9.49E-01 |
| POMP       | -0.0002 | 9.97E-01 | 9.98E-01 |
| POMT1      | 0.1080  | 3.77E-02 | 8.60E-02 |
| POMT2      | 0.1438  | 5.52E-03 | 1.79E-02 |
| POMZP3     | 0.1018  | 5.00E-02 | 1.08E-01 |
| PON1       | -0.1870 | 2.92E-04 | 1.53E-03 |
| PON2       | -0.0509 | 3.28E-01 | 4.59E-01 |
| PON3       | -0.2437 | 2.03E-06 | 2.12E-05 |
| POP1       | 0.3092  | 1.16E-09 | 2.71E-08 |
| POP4       | 0.1137  | 2.86E-02 | 6.87E-02 |
| POP5       | 0.0705  | 1.75E-01 | 2.86E-01 |
| POP7       | 0.1260  | 1.51E-02 | 4.10E-02 |
| POPDC2     | -0.0694 | 1.82E-01 | 2.94E-01 |
| POPDC3     | 0.1813  | 4.49E-04 | 2.17E-03 |
| PORCN      | 0.1367  | 8.39E-03 | 2.53E-02 |
| POR        | -0.2856 | 2.16E-08 | 3.70E-07 |
| POSTN      | 0.0035  | 9.47E-01 | 9.67E-01 |
| POT1       | -0.0331 | 5.24E-01 | 6.48E-01 |
| POTEA      | 0.1513  | 3.48E-03 | 1.22E-02 |
| POTEB      | 0.0502  | 3.35E-01 | 4.66E-01 |
| POTEC      | 0.0825  | 1.12E-01 | 2.04E-01 |
| POTED      | 0.1377  | 7.90E-03 | 2.41E-02 |
| POTEE      | 0.0175  | 7.37E-01 | 8.23E-01 |
| POTEF      | 0.0862  | 9.72E-02 | 1.82E-01 |
| POTEG      | 0.0479  | 3.57E-01 | 4.89E-01 |
| POTEH      | 0.0337  | 5.18E-01 | 6.42E-01 |
| POU1F1     | 0.0287  | 5.82E-01 | 6.98E-01 |
| POU2AF1    | 0.1060  | 4.13E-02 | 9.25E-02 |
| POU2F1     | 0.1979  | 1.24E-04 | 7.36E-04 |
| POU2F2     | -0.0061 | 9.07E-01 | 9.41E-01 |
| POU2F3     | -0.0160 | 7.58E-01 | 8.38E-01 |
| POU3F1     | 0.0581  | 2.64E-01 | 3.91E-01 |
| POU3F2     | 0.0838  | 1.07E-01 | 1.96E-01 |
| POU3F3     | 0.0015  | 9.77E-01 | 9.85E-01 |

|             |         |          |          |
|-------------|---------|----------|----------|
| POU3F4      | 0.0362  | 4.87E-01 | 6.14E-01 |
| POU4F1      | 0.0093  | 8.58E-01 | 9.09E-01 |
| POU4F2      | -0.0267 | 6.08E-01 | 7.20E-01 |
| POU4F3      | 0.0444  | 3.94E-01 | 5.27E-01 |
| POU5F1B     | 0.0547  | 2.93E-01 | 4.22E-01 |
| POU5F1      | 0.1624  | 1.70E-03 | 6.72E-03 |
| POU5F2      | 0.0449  | 3.89E-01 | 5.22E-01 |
| POU6F1      | -0.1415 | 6.35E-03 | 2.01E-02 |
| POU6F2      | 0.0649  | 2.12E-01 | 3.31E-01 |
| PP14571     | 0.2377  | 3.68E-06 | 3.57E-05 |
| PPA1        | -0.0654 | 2.09E-01 | 3.28E-01 |
| PPA2        | -0.2664 | 1.92E-07 | 2.61E-06 |
| PPAN-P2RY11 | -0.0061 | 9.06E-01 | 9.41E-01 |
| PPAN        | 0.0385  | 4.60E-01 | 5.90E-01 |
| PPAP2A      | -0.2911 | 1.11E-08 | 2.05E-07 |
| PPAP2B      | -0.2672 | 1.75E-07 | 2.41E-06 |
| PPAP2C      | 0.2414  | 2.55E-06 | 2.57E-05 |
| PPAPDC1A    | -0.0309 | 5.53E-01 | 6.72E-01 |
| PPAPDC1B    | 0.1632  | 1.61E-03 | 6.42E-03 |
| PPAPDC2     | -0.0984 | 5.84E-02 | 1.21E-01 |
| PPAPDC3     | -0.0519 | 3.19E-01 | 4.49E-01 |
| PPARA       | -0.1775 | 5.95E-04 | 2.75E-03 |
| PPARD       | 0.1642  | 1.50E-03 | 6.05E-03 |
| PPARGC1A    | -0.1724 | 8.56E-04 | 3.76E-03 |
| PPARGC1B    | -0.0910 | 7.99E-02 | 1.56E-01 |
| PPARG       | -0.0732 | 1.59E-01 | 2.66E-01 |
| PPAT        | 0.1663  | 1.31E-03 | 5.39E-03 |
| PPBPL2      | 0.0793  | 1.27E-01 | 2.24E-01 |
| PPBP        | -0.1829 | 3.98E-04 | 1.97E-03 |
| PPCDC       | 0.1894  | 2.43E-04 | 1.30E-03 |
| PPCS        | -0.1559 | 2.61E-03 | 9.59E-03 |
| PPDPF       | 0.0741  | 1.54E-01 | 2.59E-01 |
| PPEF1       | 0.1048  | 4.37E-02 | 9.67E-02 |
| PPEF2       | 0.0563  | 2.79E-01 | 4.08E-01 |
| PPFIA1      | 0.0141  | 7.86E-01 | 8.58E-01 |
| PPFIA2      | -0.0687 | 1.87E-01 | 3.00E-01 |
| PPFIA3      | 0.0077  | 8.82E-01 | 9.25E-01 |
| PPFIA4      | 0.2835  | 2.75E-08 | 4.56E-07 |
| PPFIBP1     | -0.0580 | 2.65E-01 | 3.93E-01 |
| PPFIBP2     | -0.1421 | 6.13E-03 | 1.95E-02 |
| PPHLN1      | 0.2565  | 5.51E-07 | 6.65E-06 |
| PPIAL4C     | 0.0356  | 4.95E-01 | 6.21E-01 |
| PPIAL4D     | 0.0564  | 2.79E-01 | 4.07E-01 |
| PPIAL4E     | 0.0771  | 1.38E-01 | 2.38E-01 |

|          |         |          |          |
|----------|---------|----------|----------|
| PPIAL4G  | 0.0748  | 1.50E-01 | 2.54E-01 |
| PPIA     | 0.0305  | 5.59E-01 | 6.77E-01 |
| PPIB     | -0.0321 | 5.37E-01 | 6.59E-01 |
| PPIC     | -0.0254 | 6.26E-01 | 7.35E-01 |
| PPID     | -0.2215 | 1.67E-05 | 1.32E-04 |
| PPIEL    | 0.1906  | 2.22E-04 | 1.21E-03 |
| PPIE     | 0.2093  | 4.83E-05 | 3.29E-04 |
| PPIF     | -0.1785 | 5.53E-04 | 2.59E-03 |
| PPIG     | 0.1178  | 2.33E-02 | 5.81E-02 |
| PPIH     | 0.2835  | 2.75E-08 | 4.55E-07 |
| PPIL1    | 0.1927  | 1.88E-04 | 1.05E-03 |
| PPIL2    | 0.1728  | 8.33E-04 | 3.67E-03 |
| PPIL3    | 0.0869  | 9.46E-02 | 1.78E-01 |
| PPIL4    | 0.1204  | 2.03E-02 | 5.20E-02 |
| PPIL5    | 0.2384  | 3.41E-06 | 3.33E-05 |
| PPIL6    | 0.1482  | 4.24E-03 | 1.44E-02 |
| PPIP5K1  | -0.0276 | 5.96E-01 | 7.10E-01 |
| PPIP5K2  | -0.0391 | 4.52E-01 | 5.83E-01 |
| PPL      | -0.0895 | 8.50E-02 | 1.63E-01 |
| PPM1A    | -0.1494 | 3.92E-03 | 1.35E-02 |
| PPM1B    | -0.1337 | 9.91E-03 | 2.90E-02 |
| PPM1D    | 0.2291  | 8.33E-06 | 7.14E-05 |
| PPM1E    | 0.0956  | 6.57E-02 | 1.33E-01 |
| PPM1F    | 0.0505  | 3.32E-01 | 4.63E-01 |
| PPM1G    | 0.1730  | 8.17E-04 | 3.61E-03 |
| PPM1H    | -0.0178 | 7.32E-01 | 8.19E-01 |
| PPM1J    | -0.1051 | 4.30E-02 | 9.55E-02 |
| PPM1K    | -0.2234 | 1.41E-05 | 1.14E-04 |
| PPM1L    | -0.2150 | 2.98E-05 | 2.18E-04 |
| PPM1M    | 0.1802  | 4.86E-04 | 2.32E-03 |
| PPM1N    | -0.0383 | 4.63E-01 | 5.93E-01 |
| PPME1    | 0.2345  | 4.98E-06 | 4.63E-05 |
| PPOX     | 0.4122  | 1.19E-16 | 1.19E-14 |
| PPP1CA   | -0.0047 | 9.28E-01 | 9.55E-01 |
| PPP1CB   | -0.0208 | 6.90E-01 | 7.85E-01 |
| PPP1CC   | 0.2290  | 8.36E-06 | 7.16E-05 |
| PPP1R10  | 0.0158  | 7.62E-01 | 8.40E-01 |
| PPP1R11  | 0.1031  | 4.72E-02 | 1.03E-01 |
| PPP1R12A | 0.1046  | 4.40E-02 | 9.72E-02 |
| PPP1R12B | -0.0335 | 5.20E-01 | 6.44E-01 |
| PPP1R12C | -0.0161 | 7.58E-01 | 8.37E-01 |
| PPP1R13B | 0.0104  | 8.42E-01 | 8.97E-01 |
| PPP1R13L | 0.1552  | 2.71E-03 | 9.94E-03 |
| PPP1R14A | -0.1592 | 2.09E-03 | 8.01E-03 |

|          |         |          |          |
|----------|---------|----------|----------|
| PPP1R14B | 0.0264  | 6.12E-01 | 7.23E-01 |
| PPP1R14C | 0.0905  | 8.18E-02 | 1.59E-01 |
| PPP1R14D | 0.1819  | 4.29E-04 | 2.09E-03 |
| PPP1R15A | 0.0197  | 7.05E-01 | 7.98E-01 |
| PPP1R15B | 0.1482  | 4.22E-03 | 1.44E-02 |
| PPP1R16A | -0.0445 | 3.93E-01 | 5.26E-01 |
| PPP1R16B | -0.1215 | 1.93E-02 | 4.98E-02 |
| PPP1R1A  | -0.0284 | 5.85E-01 | 7.01E-01 |
| PPP1R1B  | 0.1540  | 2.94E-03 | 1.06E-02 |
| PPP1R1C  | 0.0445  | 3.92E-01 | 5.25E-01 |
| PPP1R2P1 | -0.0019 | 9.71E-01 | 9.81E-01 |
| PPP1R2P3 | 0.0139  | 7.89E-01 | 8.60E-01 |
| PPP1R2P9 | 0.1123  | 3.05E-02 | 7.25E-02 |
| PPP1R2   | 0.0589  | 2.58E-01 | 3.83E-01 |
| PPP1R3A  | 0.1018  | 5.01E-02 | 1.08E-01 |
| PPP1R3B  | -0.1567 | 2.47E-03 | 9.16E-03 |
| PPP1R3C  | 0.0505  | 3.32E-01 | 4.63E-01 |
| PPP1R3D  | 0.0598  | 2.51E-01 | 3.76E-01 |
| PPP1R3E  | 0.0504  | 3.33E-01 | 4.64E-01 |
| PPP1R3F  | -0.0310 | 5.51E-01 | 6.71E-01 |
| PPP1R3G  | 0.0271  | 6.02E-01 | 7.15E-01 |
| PPP1R7   | -0.0120 | 8.17E-01 | 8.80E-01 |
| PPP1R8   | 0.0542  | 2.98E-01 | 4.28E-01 |
| PPP1R9A  | 0.2696  | 1.34E-07 | 1.89E-06 |
| PPP1R9B  | 0.0386  | 4.58E-01 | 5.89E-01 |
| PPP2CA   | 0.0281  | 5.89E-01 | 7.04E-01 |
| PPP2CB   | -0.1366 | 8.45E-03 | 2.55E-02 |
| PPP2R1A  | 0.0511  | 3.26E-01 | 4.57E-01 |
| PPP2R1B  | -0.0562 | 2.80E-01 | 4.09E-01 |
| PPP2R2A  | -0.0575 | 2.70E-01 | 3.97E-01 |
| PPP2R2B  | 0.0871  | 9.40E-02 | 1.77E-01 |
| PPP2R2C  | 0.1285  | 1.32E-02 | 3.68E-02 |
| PPP2R2D  | -0.1054 | 4.25E-02 | 9.46E-02 |
| PPP2R3A  | 0.0486  | 3.51E-01 | 4.83E-01 |
| PPP2R3B  | 0.1255  | 1.56E-02 | 4.19E-02 |
| PPP2R3C  | 0.0858  | 9.88E-02 | 1.84E-01 |
| PPP2R4   | -0.0243 | 6.41E-01 | 7.46E-01 |
| PPP2R5A  | 0.1311  | 1.15E-02 | 3.26E-02 |
| PPP2R5B  | -0.0755 | 1.46E-01 | 2.49E-01 |
| PPP2R5C  | -0.0918 | 7.74E-02 | 1.52E-01 |
| PPP2R5D  | 0.2432  | 2.14E-06 | 2.22E-05 |
| PPP2R5E  | -0.0434 | 4.05E-01 | 5.38E-01 |
| PPP3CA   | -0.1809 | 4.64E-04 | 2.23E-03 |
| PPP3CB   | 0.0738  | 1.56E-01 | 2.61E-01 |

|          |         |          |          |
|----------|---------|----------|----------|
| PPP3CC   | -0.1132 | 2.93E-02 | 7.01E-02 |
| PPP3R1   | -0.0960 | 6.48E-02 | 1.32E-01 |
| PPP3R2   | 0.0936  | 7.17E-02 | 1.43E-01 |
| PPP4C    | 0.0152  | 7.71E-01 | 8.46E-01 |
| PPP4R1L  | -0.0161 | 7.57E-01 | 8.37E-01 |
| PPP4R1   | 0.0603  | 2.47E-01 | 3.71E-01 |
| PPP4R2   | -0.0888 | 8.77E-02 | 1.67E-01 |
| PPP4R4   | -0.1696 | 1.04E-03 | 4.45E-03 |
| PPP5C    | 0.1149  | 2.69E-02 | 6.55E-02 |
| PPP6C    | 0.1231  | 1.77E-02 | 4.65E-02 |
| PPPDE1   | 0.3480  | 5.29E-12 | 2.04E-10 |
| PPPDE2   | -0.1854 | 3.31E-04 | 1.70E-03 |
| PPRC1    | 0.1312  | 1.14E-02 | 3.25E-02 |
| PPT1     | 0.2381  | 3.53E-06 | 3.43E-05 |
| PPT2     | 0.0289  | 5.79E-01 | 6.95E-01 |
| PPTC7    | -0.0817 | 1.16E-01 | 2.09E-01 |
| PPWD1    | 0.2360  | 4.31E-06 | 4.09E-05 |
| PPY2     | 0.1692  | 1.07E-03 | 4.54E-03 |
| PPYR1    | 0.0989  | 5.70E-02 | 1.19E-01 |
| PPY      | 0.0499  | 3.38E-01 | 4.70E-01 |
| PQBP1    | 0.2182  | 2.24E-05 | 1.70E-04 |
| PQLC1    | -0.2807 | 3.81E-08 | 6.13E-07 |
| PQLC2    | 0.0676  | 1.94E-01 | 3.09E-01 |
| PQLC3    | -0.1140 | 2.82E-02 | 6.80E-02 |
| PRAC     | 0.0477  | 3.60E-01 | 4.92E-01 |
| PRAF2    | 0.0698  | 1.80E-01 | 2.91E-01 |
| PRAM1    | -0.0272 | 6.01E-01 | 7.14E-01 |
| PRAMEF10 | -0.1871 | 2.90E-04 | 1.51E-03 |
| PRAMEF11 | -0.1347 | 9.41E-03 | 2.79E-02 |
| PRAMEF12 | -0.0179 | 7.30E-01 | 8.17E-01 |
| PRAMEF13 | 0.0077  | 8.83E-01 | 9.25E-01 |
| PRAMEF14 | 0.1030  | 4.73E-02 | 1.03E-01 |
| PRAMEF16 | 0.0087  | 8.68E-01 | 9.15E-01 |
| PRAMEF17 | 0.0417  | 4.23E-01 | 5.55E-01 |
| PRAMEF18 | 0.0062  | 9.06E-01 | 9.41E-01 |
| PRAMEF1  | -0.0071 | 8.91E-01 | 9.30E-01 |
| PRAMEF20 | -0.0303 | 5.61E-01 | 6.79E-01 |
| PRAMEF22 | 0.1217  | 1.90E-02 | 4.93E-02 |
| PRAMEF2  | 0.0009  | 9.86E-01 | 9.91E-01 |
| PRAMEF4  | -0.1610 | 1.87E-03 | 7.27E-03 |
| PRAMEF5  | -0.1375 | 7.98E-03 | 2.43E-02 |
| PRAMEF6  | -0.1019 | 4.98E-02 | 1.07E-01 |
| PRAMEF8  | -0.0280 | 5.91E-01 | 7.05E-01 |
| PRAMEF9  | -0.1733 | 8.00E-04 | 3.55E-03 |

|          |         |          |          |
|----------|---------|----------|----------|
| PRAME    | 0.2063  | 6.25E-05 | 4.09E-04 |
| PRAP1    | -0.1032 | 4.70E-02 | 1.02E-01 |
| PRB1     | -0.1117 | 3.15E-02 | 7.42E-02 |
| PRB2     | -0.0372 | 4.75E-01 | 6.04E-01 |
| PRB3     | 0.1273  | 1.42E-02 | 3.89E-02 |
| PRB4     | -0.0521 | 3.17E-01 | 4.47E-01 |
| PRC1     | 0.4210  | 2.27E-17 | 2.72E-15 |
| PRCC     | 0.5277  | 5.53E-28 | 4.08E-25 |
| PRCD     | 0.0364  | 4.85E-01 | 6.13E-01 |
| PRCP     | -0.2435 | 2.07E-06 | 2.16E-05 |
| PRDM10   | 0.2410  | 2.66E-06 | 2.67E-05 |
| PRDM11   | -0.0249 | 6.33E-01 | 7.40E-01 |
| PRDM12   | -0.0619 | 2.34E-01 | 3.58E-01 |
| PRDM13   | 0.1473  | 4.46E-03 | 1.50E-02 |
| PRDM14   | -0.0098 | 8.51E-01 | 9.04E-01 |
| PRDM15   | 0.2344  | 5.01E-06 | 4.65E-05 |
| PRDM16   | 0.0730  | 1.61E-01 | 2.67E-01 |
| PRDM1    | -0.0900 | 8.33E-02 | 1.61E-01 |
| PRDM2    | -0.0117 | 8.23E-01 | 8.84E-01 |
| PRDM4    | 0.2380  | 3.54E-06 | 3.44E-05 |
| PRDM5    | 0.0536  | 3.03E-01 | 4.32E-01 |
| PRDM6    | -0.0011 | 9.83E-01 | 9.89E-01 |
| PRDM7    | 0.0429  | 4.10E-01 | 5.43E-01 |
| PRDM8    | -0.0408 | 4.33E-01 | 5.65E-01 |
| PRDM9    | 0.0969  | 6.21E-02 | 1.28E-01 |
| PRDX1    | 0.0796  | 1.26E-01 | 2.22E-01 |
| PRDX2    | -0.1543 | 2.89E-03 | 1.05E-02 |
| PRDX3    | -0.2765 | 6.19E-08 | 9.44E-07 |
| PRDX4    | -0.1148 | 2.70E-02 | 6.56E-02 |
| PRDX5    | -0.0882 | 8.98E-02 | 1.71E-01 |
| PRDX6    | 0.0817  | 1.16E-01 | 2.09E-01 |
| PRDXDD1P | 0.2262  | 1.09E-05 | 9.04E-05 |
| PREB     | -0.0759 | 1.44E-01 | 2.46E-01 |
| PRELID1  | -0.0006 | 9.91E-01 | 9.95E-01 |
| PRELID2  | 0.2689  | 1.45E-07 | 2.04E-06 |
| PRELP    | -0.1588 | 2.16E-03 | 8.20E-03 |
| PREPL    | -0.0177 | 7.34E-01 | 8.20E-01 |
| PREP     | 0.0529  | 3.09E-01 | 4.39E-01 |
| PREX1    | -0.0534 | 3.05E-01 | 4.34E-01 |
| PREX2    | -0.0918 | 7.73E-02 | 1.52E-01 |
| PRF1     | -0.1272 | 1.42E-02 | 3.91E-02 |
| PRG1     | 0.0396  | 4.47E-01 | 5.78E-01 |
| PRG2     | -0.1971 | 1.33E-04 | 7.77E-04 |
| PRG3     | -0.0295 | 5.71E-01 | 6.89E-01 |



|          |         |          |          |
|----------|---------|----------|----------|
| PRG4     | -0.0938 | 7.12E-02 | 1.42E-01 |
| PRH1     | -0.0059 | 9.10E-01 | 9.43E-01 |
| PRH2     | 0.0004  | 9.93E-01 | 9.96E-01 |
| PRHOXNB  | 0.0261  | 6.17E-01 | 7.26E-01 |
| PRIC285  | -0.0590 | 2.57E-01 | 3.82E-01 |
| PRICKLE1 | -0.1279 | 1.37E-02 | 3.78E-02 |
| PRICKLE2 | -0.1691 | 1.08E-03 | 4.59E-03 |
| PRICKLE3 | 0.0170  | 7.45E-01 | 8.28E-01 |
| PRICKLE4 | 0.0212  | 6.84E-01 | 7.81E-01 |
| PRIM1    | 0.3939  | 3.21E-15 | 2.31E-13 |
| PRIM2    | 0.3658  | 3.45E-13 | 1.67E-11 |
| PRIMA1   | 0.0749  | 1.50E-01 | 2.54E-01 |
| PRINS    | 0.0629  | 2.27E-01 | 3.49E-01 |
| PRKAA1   | 0.0608  | 2.42E-01 | 3.67E-01 |
| PRKAA2   | 0.0450  | 3.88E-01 | 5.21E-01 |
| PRKAB1   | 0.0928  | 7.43E-02 | 1.47E-01 |
| PRKAB2   | 0.1994  | 1.10E-04 | 6.59E-04 |
| PRKACA   | -0.1287 | 1.31E-02 | 3.66E-02 |
| PRKACB   | 0.0163  | 7.54E-01 | 8.35E-01 |
| PRKACG   | 0.0170  | 7.44E-01 | 8.27E-01 |
| PRKAG1   | -0.0177 | 7.35E-01 | 8.20E-01 |
| PRKAG2   | -0.2307 | 7.13E-06 | 6.26E-05 |
| PRKAG3   | 0.1635  | 1.58E-03 | 6.32E-03 |
| PRKAR1A  | -0.0286 | 5.83E-01 | 6.99E-01 |
| PRKAR1B  | -0.1504 | 3.70E-03 | 1.29E-02 |
| PRKAR2A  | -0.0876 | 9.19E-02 | 1.74E-01 |
| PRKAR2B  | -0.0311 | 5.50E-01 | 6.71E-01 |
| PRKCA    | 0.1937  | 1.74E-04 | 9.80E-04 |
| PRKCB    | -0.0966 | 6.30E-02 | 1.29E-01 |
| PRKCDBP  | -0.0207 | 6.91E-01 | 7.86E-01 |
| PRKCD    | 0.1951  | 1.55E-04 | 8.89E-04 |
| PRKCE    | -0.1224 | 1.84E-02 | 4.80E-02 |
| PRKCG    | 0.0926  | 7.50E-02 | 1.48E-01 |
| PRKCH    | -0.2301 | 7.58E-06 | 6.59E-05 |
| PRKCI    | 0.2509  | 9.88E-07 | 1.12E-05 |
| PRKCQ    | -0.0921 | 7.64E-02 | 1.50E-01 |
| PRKCSH   | -0.0859 | 9.86E-02 | 1.84E-01 |
| PRKCZ    | -0.1063 | 4.07E-02 | 9.13E-02 |
| PRKD1    | -0.1496 | 3.87E-03 | 1.34E-02 |
| PRKD2    | 0.1249  | 1.61E-02 | 4.30E-02 |
| PRKD3    | 0.0256  | 6.23E-01 | 7.32E-01 |
| PRKDC    | 0.1646  | 1.46E-03 | 5.92E-03 |
| PRKG1    | -0.1623 | 1.71E-03 | 6.77E-03 |
| PRKG2    | 0.0142  | 7.86E-01 | 8.58E-01 |

|         |         |          |          |
|---------|---------|----------|----------|
| PRKRA   | 0.2206  | 1.80E-05 | 1.41E-04 |
| PRKRIP1 | 0.1041  | 4.52E-02 | 9.92E-02 |
| PRKRIR  | 0.0420  | 4.20E-01 | 5.53E-01 |
| PRKX    | 0.1237  | 1.72E-02 | 4.53E-02 |
| PRKY    | 0.0014  | 9.78E-01 | 9.86E-01 |
| PRLHR   | 0.0539  | 3.01E-01 | 4.30E-01 |
| PRLH    | -0.0340 | 5.13E-01 | 6.38E-01 |
| PRLR    | 0.1137  | 2.85E-02 | 6.86E-02 |
| PRL     | 0.1448  | 5.19E-03 | 1.70E-02 |
| PRM1    | -0.0057 | 9.12E-01 | 9.45E-01 |
| PRM2    | 0.0821  | 1.14E-01 | 2.07E-01 |
| PRMT10  | -0.0785 | 1.31E-01 | 2.29E-01 |
| PRMT1   | 0.0837  | 1.08E-01 | 1.97E-01 |
| PRMT2   | 0.0784  | 1.32E-01 | 2.30E-01 |
| PRMT3   | 0.2256  | 1.15E-05 | 9.47E-05 |
| PRMT5   | 0.1423  | 6.04E-03 | 1.93E-02 |
| PRMT6   | -0.0682 | 1.90E-01 | 3.04E-01 |
| PRMT7   | -0.0443 | 3.95E-01 | 5.28E-01 |
| PRMT8   | 0.0424  | 4.16E-01 | 5.48E-01 |
| PRND    | 0.0400  | 4.42E-01 | 5.74E-01 |
| PRNP    | -0.0083 | 8.73E-01 | 9.18E-01 |
| PRO0611 | 0.0201  | 6.99E-01 | 7.93E-01 |
| PRO0628 | -0.0003 | 9.95E-01 | 9.97E-01 |
| PRO1768 | 0.0767  | 1.40E-01 | 2.41E-01 |
| PROCA1  | 0.3046  | 2.10E-09 | 4.63E-08 |
| PROCR   | -0.0384 | 4.60E-01 | 5.91E-01 |
| PROC    | -0.1018 | 5.00E-02 | 1.08E-01 |
| PRODH2  | -0.1208 | 1.99E-02 | 5.12E-02 |
| PRODH   | -0.1069 | 3.96E-02 | 8.94E-02 |
| PROK1   | -0.0717 | 1.68E-01 | 2.77E-01 |
| PROK2   | 0.0094  | 8.57E-01 | 9.08E-01 |
| PROKR1  | 0.0743  | 1.53E-01 | 2.57E-01 |
| PROKR2  | 0.0154  | 7.67E-01 | 8.43E-01 |
| PROL1   | -0.0834 | 1.09E-01 | 1.99E-01 |
| PROM1   | 0.1342  | 9.67E-03 | 2.85E-02 |
| PROM2   | 0.1156  | 2.59E-02 | 6.35E-02 |
| PROP1   | 0.1266  | 1.47E-02 | 4.00E-02 |
| PROS1   | -0.3190 | 3.21E-10 | 8.58E-09 |
| PROSC   | -0.0880 | 9.05E-02 | 1.72E-01 |
| PROX1   | -0.0590 | 2.57E-01 | 3.83E-01 |
| PROX2   | -0.0146 | 7.79E-01 | 8.53E-01 |
| PROZ    | -0.2418 | 2.47E-06 | 2.50E-05 |
| PRPF18  | 0.1788  | 5.41E-04 | 2.54E-03 |
| PRPF19  | 0.1681  | 1.16E-03 | 4.87E-03 |

|             |         |          |          |
|-------------|---------|----------|----------|
| PRPF31      | 0.0251  | 6.29E-01 | 7.37E-01 |
| PRPF38A     | 0.3869  | 1.08E-14 | 6.90E-13 |
| PRPF38B     | 0.1830  | 3.96E-04 | 1.96E-03 |
| PRPF39      | 0.3141  | 6.15E-10 | 1.53E-08 |
| PRPF3       | 1.0000  | 1.00E-50 | 1.00E-46 |
| PRPF40A     | 0.1807  | 4.69E-04 | 2.25E-03 |
| PRPF40B     | 0.3001  | 3.72E-09 | 7.70E-08 |
| PRPF4B      | 0.2445  | 1.87E-06 | 1.98E-05 |
| PRPF4       | 0.2546  | 6.69E-07 | 7.94E-06 |
| PRPF6       | 0.2811  | 3.63E-08 | 5.85E-07 |
| PRPF8       | -0.0027 | 9.59E-01 | 9.74E-01 |
| PRPH2       | 0.0464  | 3.73E-01 | 5.06E-01 |
| PRPH        | 0.0406  | 4.35E-01 | 5.67E-01 |
| PRPS1L1     | 0.1692  | 1.07E-03 | 4.55E-03 |
| PRPS1       | 0.1117  | 3.14E-02 | 7.41E-02 |
| PRPS2       | 0.0719  | 1.67E-01 | 2.75E-01 |
| PRPSAP1     | 0.1254  | 1.57E-02 | 4.22E-02 |
| PRPSAP2     | 0.1100  | 3.42E-02 | 7.95E-02 |
| PRR11       | 0.2481  | 1.31E-06 | 1.44E-05 |
| PRR12       | 0.1945  | 1.63E-04 | 9.25E-04 |
| PRR13       | 0.0062  | 9.06E-01 | 9.41E-01 |
| PRR14       | 0.1403  | 6.80E-03 | 2.12E-02 |
| PRR15L      | 0.1101  | 3.41E-02 | 7.93E-02 |
| PRR15       | 0.0245  | 6.38E-01 | 7.44E-01 |
| PRR16       | -0.0478 | 3.58E-01 | 4.91E-01 |
| PRR18       | -0.0908 | 8.07E-02 | 1.57E-01 |
| PRR19       | 0.1763  | 6.48E-04 | 2.96E-03 |
| PRR22       | -0.0234 | 6.54E-01 | 7.56E-01 |
| PRR23A      | 0.0863  | 9.71E-02 | 1.82E-01 |
| PRR23B      | 0.0493  | 3.43E-01 | 4.75E-01 |
| PRR23C      | -0.0035 | 9.47E-01 | 9.67E-01 |
| PRR24       | 0.1119  | 3.12E-02 | 7.37E-02 |
| PRR25       | 0.0137  | 7.92E-01 | 8.62E-01 |
| PRR3        | 0.2962  | 5.98E-09 | 1.17E-07 |
| PRR4        | 0.1766  | 6.32E-04 | 2.90E-03 |
| PRR5-ARHGAP | 0.0837  | 1.08E-01 | 1.97E-01 |
| PRR5L       | -0.0479 | 3.58E-01 | 4.90E-01 |
| PRR5        | -0.0748 | 1.51E-01 | 2.55E-01 |
| PRR7        | 0.0119  | 8.19E-01 | 8.81E-01 |
| PRRC1       | 0.0155  | 7.65E-01 | 8.42E-01 |
| PRRG1       | -0.2734 | 8.80E-08 | 1.29E-06 |
| PRRG2       | -0.0177 | 7.35E-01 | 8.20E-01 |
| PRRG3       | 0.0718  | 1.68E-01 | 2.76E-01 |
| PRRG4       | -0.0250 | 6.32E-01 | 7.39E-01 |

|         |         |          |          |
|---------|---------|----------|----------|
| PRRT1   | -0.0311 | 5.51E-01 | 6.71E-01 |
| PRRT2   | 0.2425  | 2.29E-06 | 2.35E-05 |
| PRRT3   | -0.0047 | 9.27E-01 | 9.54E-01 |
| PRRT4   | -0.0057 | 9.14E-01 | 9.46E-01 |
| PRRX1   | 0.0210  | 6.87E-01 | 7.83E-01 |
| PRRX2   | 0.1000  | 5.43E-02 | 1.15E-01 |
| PRSS12  | 0.0239  | 6.46E-01 | 7.51E-01 |
| PRSS16  | 0.1673  | 1.22E-03 | 5.08E-03 |
| PRSS1   | 0.0411  | 4.30E-01 | 5.62E-01 |
| PRSS21  | 0.0976  | 6.03E-02 | 1.25E-01 |
| PRSS22  | 0.1090  | 3.58E-02 | 8.24E-02 |
| PRSS23  | -0.0323 | 5.35E-01 | 6.57E-01 |
| PRSS27  | 0.0897  | 8.46E-02 | 1.63E-01 |
| PRSS30P | 0.1602  | 1.96E-03 | 7.58E-03 |
| PRSS33  | 0.1485  | 4.14E-03 | 1.41E-02 |
| PRSS35  | 0.1278  | 1.38E-02 | 3.81E-02 |
| PRSS36  | -0.1417 | 6.26E-03 | 1.98E-02 |
| PRSS37  | 0.0810  | 1.19E-01 | 2.14E-01 |
| PRSS38  | 0.1926  | 1.90E-04 | 1.06E-03 |
| PRSS3   | 0.1280  | 1.36E-02 | 3.77E-02 |
| PRSS41  | 0.1266  | 1.47E-02 | 4.00E-02 |
| PRSS42  | 0.1166  | 2.47E-02 | 6.09E-02 |
| PRSS45  | 0.1673  | 1.22E-03 | 5.08E-03 |
| PRSS48  | -0.0298 | 5.67E-01 | 6.84E-01 |
| PRSS50  | 0.1665  | 1.29E-03 | 5.32E-03 |
| PRSS53  | -0.0657 | 2.06E-01 | 3.24E-01 |
| PRSS54  | -0.0468 | 3.69E-01 | 5.02E-01 |
| PRSS55  | 0.1156  | 2.60E-02 | 6.37E-02 |
| PRSS8   | 0.0409  | 4.32E-01 | 5.64E-01 |
| PRSSL1  | -0.0264 | 6.12E-01 | 7.23E-01 |
| PRTFDC1 | 0.3043  | 2.19E-09 | 4.78E-08 |
| PRTG    | -0.0470 | 3.66E-01 | 4.99E-01 |
| PRTN3   | 0.0499  | 3.38E-01 | 4.70E-01 |
| PRUNE2  | -0.0170 | 7.45E-01 | 8.28E-01 |
| PRUNE   | 0.3945  | 2.89E-15 | 2.09E-13 |
| PRX     | 0.0918  | 7.75E-02 | 1.52E-01 |
| PRY2    | -0.0998 | 5.49E-02 | 1.16E-01 |
| PSAPL1  | 0.2210  | 1.73E-05 | 1.36E-04 |
| PSAP    | -0.1550 | 2.76E-03 | 1.01E-02 |
| PSAT1   | -0.0459 | 3.78E-01 | 5.11E-01 |
| PSCA    | 0.0776  | 1.36E-01 | 2.35E-01 |
| PSD2    | -0.1029 | 4.77E-02 | 1.04E-01 |
| PSD3    | -0.0864 | 9.64E-02 | 1.81E-01 |
| PSD4    | -0.2160 | 2.72E-05 | 2.02E-04 |

|          |         |          |          |
|----------|---------|----------|----------|
| PSD      | -0.1733 | 8.04E-04 | 3.57E-03 |
| PSEN1    | -0.1251 | 1.59E-02 | 4.26E-02 |
| PSEN2    | 0.1013  | 5.12E-02 | 1.10E-01 |
| PSENEEN  | 0.0347  | 5.05E-01 | 6.30E-01 |
| PSG10    | -0.0280 | 5.91E-01 | 7.05E-01 |
| PSG11    | -0.0388 | 4.56E-01 | 5.87E-01 |
| PSG1     | 0.0634  | 2.23E-01 | 3.44E-01 |
| PSG2     | -0.0031 | 9.53E-01 | 9.71E-01 |
| PSG3     | -0.1239 | 1.69E-02 | 4.49E-02 |
| PSG4     | -0.0226 | 6.65E-01 | 7.65E-01 |
| PSG5     | 0.0354  | 4.97E-01 | 6.23E-01 |
| PSG6     | -0.0245 | 6.38E-01 | 7.44E-01 |
| PSG7     | 0.0238  | 6.48E-01 | 7.52E-01 |
| PSG8     | -0.0836 | 1.08E-01 | 1.97E-01 |
| PSG9     | -0.0173 | 7.40E-01 | 8.24E-01 |
| PSIMCT-1 | -0.0038 | 9.42E-01 | 9.64E-01 |
| PSIP1    | 0.2520  | 8.80E-07 | 1.01E-05 |
| PSKH1    | -0.1575 | 2.35E-03 | 8.80E-03 |
| PSKH2    | 0.0800  | 1.24E-01 | 2.19E-01 |
| PSMA1    | 0.1661  | 1.33E-03 | 5.44E-03 |
| PSMA2    | -0.0978 | 5.98E-02 | 1.24E-01 |
| PSMA3    | 0.0451  | 3.86E-01 | 5.19E-01 |
| PSMA4    | 0.0696  | 1.81E-01 | 2.93E-01 |
| PSMA5    | 0.0378  | 4.68E-01 | 5.97E-01 |
| PSMA6    | 0.1813  | 4.49E-04 | 2.17E-03 |
| PSMA7    | 0.0422  | 4.18E-01 | 5.51E-01 |
| PSMA8    | 0.1342  | 9.68E-03 | 2.85E-02 |
| PSMB10   | -0.0944 | 6.93E-02 | 1.39E-01 |
| PSMB11   | -0.0078 | 8.80E-01 | 9.23E-01 |
| PSMB1    | 0.1456  | 4.95E-03 | 1.63E-02 |
| PSMB2    | 0.0930  | 7.36E-02 | 1.46E-01 |
| PSMB3    | 0.1177  | 2.33E-02 | 5.82E-02 |
| PSMB4    | 0.4242  | 1.24E-17 | 1.62E-15 |
| PSMB5    | -0.0378 | 4.68E-01 | 5.98E-01 |
| PSMB6    | -0.0841 | 1.06E-01 | 1.94E-01 |
| PSMB7    | 0.0523  | 3.15E-01 | 4.45E-01 |
| PSMB8    | -0.0478 | 3.58E-01 | 4.91E-01 |
| PSMB9    | 0.0767  | 1.40E-01 | 2.41E-01 |
| PSMC1    | 0.0240  | 6.45E-01 | 7.50E-01 |
| PSMC2    | -0.1209 | 1.98E-02 | 5.10E-02 |
| PSMC3IP  | 0.4194  | 3.05E-17 | 3.52E-15 |
| PSMC3    | 0.0506  | 3.31E-01 | 4.62E-01 |
| PSMC4    | 0.0778  | 1.35E-01 | 2.33E-01 |
| PSMC5    | 0.1325  | 1.06E-02 | 3.06E-02 |

|          |         |          |          |
|----------|---------|----------|----------|
| PSMC6    | 0.0212  | 6.83E-01 | 7.80E-01 |
| PSMD10   | 0.2094  | 4.81E-05 | 3.27E-04 |
| PSMD11   | 0.1493  | 3.96E-03 | 1.36E-02 |
| PSMD12   | 0.1601  | 1.97E-03 | 7.61E-03 |
| PSMD13   | 0.0450  | 3.87E-01 | 5.21E-01 |
| PSMD14   | 0.1869  | 2.95E-04 | 1.54E-03 |
| PSMD1    | 0.0955  | 6.62E-02 | 1.34E-01 |
| PSMD2    | 0.1003  | 5.35E-02 | 1.13E-01 |
| PSMD3    | 0.1952  | 1.55E-04 | 8.86E-04 |
| PSMD4    | 0.4027  | 6.71E-16 | 5.69E-14 |
| PSMD5    | 0.1507  | 3.62E-03 | 1.26E-02 |
| PSMD6    | -0.0380 | 4.66E-01 | 5.96E-01 |
| PSMD7    | -0.1236 | 1.72E-02 | 4.54E-02 |
| PSMD8    | -0.0056 | 9.15E-01 | 9.47E-01 |
| PSMD9    | -0.0730 | 1.60E-01 | 2.67E-01 |
| PSME1    | -0.0299 | 5.66E-01 | 6.84E-01 |
| PSME2    | 0.0049  | 9.25E-01 | 9.52E-01 |
| PSME3    | 0.2413  | 2.57E-06 | 2.59E-05 |
| PSME4    | 0.0479  | 3.57E-01 | 4.89E-01 |
| PSMF1    | -0.1826 | 4.09E-04 | 2.01E-03 |
| PSMG1    | 0.1401  | 6.89E-03 | 2.15E-02 |
| PSMG2    | 0.0576  | 2.68E-01 | 3.96E-01 |
| PSMG3    | 0.1995  | 1.09E-04 | 6.57E-04 |
| PSMG4    | 0.0514  | 3.23E-01 | 4.53E-01 |
| PSORS1C1 | 0.1476  | 4.37E-03 | 1.48E-02 |
| PSORS1C2 | 0.1361  | 8.64E-03 | 2.60E-02 |
| PSORS1C3 | 0.0800  | 1.24E-01 | 2.20E-01 |
| PSPC1    | 0.1608  | 1.89E-03 | 7.33E-03 |
| PSPH     | 0.2620  | 3.08E-07 | 3.99E-06 |
| PSPN     | -0.0307 | 5.56E-01 | 6.75E-01 |
| PSRC1    | 0.3553  | 1.78E-12 | 7.49E-11 |
| PSTK     | -0.0745 | 1.52E-01 | 2.57E-01 |
| PSTPIP1  | -0.0307 | 5.55E-01 | 6.74E-01 |
| PSTPIP2  | 0.0153  | 7.69E-01 | 8.45E-01 |
| PTAFR    | -0.0505 | 3.32E-01 | 4.63E-01 |
| PTAR1    | 0.0739  | 1.56E-01 | 2.61E-01 |
| PTBP1    | 0.3347  | 3.67E-11 | 1.20E-09 |
| PTBP2    | 0.3012  | 3.23E-09 | 6.77E-08 |
| PTCD1    | -0.0689 | 1.85E-01 | 2.98E-01 |
| PTCD2    | -0.1482 | 4.22E-03 | 1.44E-02 |
| PTCD3    | -0.0689 | 1.86E-01 | 2.99E-01 |
| PTCH1    | 0.0212  | 6.84E-01 | 7.81E-01 |
| PTCH2    | -0.0563 | 2.79E-01 | 4.08E-01 |
| PTCHD1   | -0.0392 | 4.52E-01 | 5.83E-01 |

|         |         |          |          |
|---------|---------|----------|----------|
| PTCHD2  | 0.0708  | 1.74E-01 | 2.84E-01 |
| PTCHD3  | 0.1521  | 3.32E-03 | 1.17E-02 |
| PTCRA   | -0.0656 | 2.07E-01 | 3.25E-01 |
| PTDSS1  | -0.0788 | 1.30E-01 | 2.27E-01 |
| PTDSS2  | 0.0543  | 2.97E-01 | 4.26E-01 |
| PTENP1  | -0.2114 | 4.04E-05 | 2.82E-04 |
| PTEN    | -0.2470 | 1.47E-06 | 1.59E-05 |
| PTER    | 0.0042  | 9.36E-01 | 9.60E-01 |
| PTF1A   | 0.1766  | 6.35E-04 | 2.92E-03 |
| PTGDR   | -0.1771 | 6.09E-04 | 2.81E-03 |
| PTGDS   | -0.0546 | 2.94E-01 | 4.23E-01 |
| PTGER1  | -0.0509 | 3.28E-01 | 4.59E-01 |
| PTGER2  | -0.1490 | 4.03E-03 | 1.39E-02 |
| PTGER3  | -0.1831 | 3.93E-04 | 1.95E-03 |
| PTGER4  | 0.0059  | 9.10E-01 | 9.43E-01 |
| PTGES2  | 0.0955  | 6.60E-02 | 1.34E-01 |
| PTGES3  | 0.2841  | 2.57E-08 | 4.29E-07 |
| PTGES   | 0.1460  | 4.84E-03 | 1.61E-02 |
| PTGFRN  | 0.0588  | 2.58E-01 | 3.84E-01 |
| PTGFR   | 0.0331  | 5.25E-01 | 6.48E-01 |
| PTGIR   | -0.1147 | 2.72E-02 | 6.60E-02 |
| PTGIS   | -0.0938 | 7.12E-02 | 1.42E-01 |
| PTGR1   | -0.1085 | 3.67E-02 | 8.43E-02 |
| PTGR2   | -0.2401 | 2.89E-06 | 2.86E-05 |
| PTGS1   | 0.0147  | 7.78E-01 | 8.52E-01 |
| PTGS2   | -0.1203 | 2.05E-02 | 5.23E-02 |
| PTH1R   | -0.1758 | 6.70E-04 | 3.05E-03 |
| PTH2R   | -0.1317 | 1.11E-02 | 3.18E-02 |
| PTH2    | -0.0225 | 6.66E-01 | 7.66E-01 |
| PTHLH   | 0.0719  | 1.67E-01 | 2.75E-01 |
| PTH     | 0.0358  | 4.92E-01 | 6.19E-01 |
| PTK2B   | -0.1561 | 2.57E-03 | 9.49E-03 |
| PTK2    | 0.0602  | 2.47E-01 | 3.72E-01 |
| PTK6    | 0.0405  | 4.37E-01 | 5.68E-01 |
| PTK7    | 0.1434  | 5.67E-03 | 1.83E-02 |
| PTMA    | 0.2544  | 6.88E-07 | 8.12E-06 |
| PTMS    | -0.1381 | 7.72E-03 | 2.36E-02 |
| PTN     | -0.0542 | 2.97E-01 | 4.27E-01 |
| PTOV1   | 0.0022  | 9.66E-01 | 9.79E-01 |
| PTP4A1  | -0.0579 | 2.66E-01 | 3.93E-01 |
| PTP4A2  | 0.0626  | 2.29E-01 | 3.52E-01 |
| PTP4A3  | 0.1801  | 4.90E-04 | 2.34E-03 |
| PTPDC1  | 0.4141  | 8.32E-17 | 8.55E-15 |
| PTPLAD1 | -0.1312 | 1.14E-02 | 3.25E-02 |

|         |         |          |          |
|---------|---------|----------|----------|
| PTPLAD2 | -0.0907 | 8.10E-02 | 1.57E-01 |
| PTPLA   | 0.0583  | 2.63E-01 | 3.90E-01 |
| PTPLB   | -0.0490 | 3.47E-01 | 4.79E-01 |
| PTPMT1  | -0.0155 | 7.66E-01 | 8.42E-01 |
| PTPN11  | -0.1377 | 7.89E-03 | 2.40E-02 |
| PTPN12  | 0.0910  | 8.01E-02 | 1.56E-01 |
| PTPN13  | -0.0847 | 1.03E-01 | 1.90E-01 |
| PTPN14  | 0.0740  | 1.55E-01 | 2.60E-01 |
| PTPN18  | -0.0224 | 6.67E-01 | 7.67E-01 |
| PTPN1   | 0.0231  | 6.58E-01 | 7.60E-01 |
| PTPN20B | 0.1902  | 2.29E-04 | 1.24E-03 |
| PTPN21  | -0.1399 | 6.95E-03 | 2.16E-02 |
| PTPN22  | -0.0221 | 6.71E-01 | 7.71E-01 |
| PTPN23  | 0.2227  | 1.49E-05 | 1.20E-04 |
| PTPN2   | 0.1074  | 3.87E-02 | 8.78E-02 |
| PTPN3   | 0.0405  | 4.36E-01 | 5.68E-01 |
| PTPN4   | -0.1659 | 1.34E-03 | 5.50E-03 |
| PTPN5   | -0.0510 | 3.27E-01 | 4.58E-01 |
| PTPN6   | 0.1131  | 2.93E-02 | 7.02E-02 |
| PTPN7   | 0.0053  | 9.19E-01 | 9.49E-01 |
| PTPN9   | -0.0488 | 3.49E-01 | 4.81E-01 |
| PTPRA   | -0.0271 | 6.03E-01 | 7.16E-01 |
| PTPRB   | -0.2003 | 1.02E-04 | 6.21E-04 |
| PTPRCAP | -0.0212 | 6.83E-01 | 7.80E-01 |
| PTPRC   | -0.0947 | 6.86E-02 | 1.38E-01 |
| PTPRD   | -0.0455 | 3.82E-01 | 5.15E-01 |
| PTPRE   | 0.0433  | 4.06E-01 | 5.39E-01 |
| PTPRF   | 0.0719  | 1.67E-01 | 2.75E-01 |
| PTPRG   | -0.1334 | 1.01E-02 | 2.94E-02 |
| PTPRH   | 0.1245  | 1.64E-02 | 4.38E-02 |
| PTPRJ   | -0.0206 | 6.93E-01 | 7.88E-01 |
| PTPRK   | 0.1283  | 1.34E-02 | 3.71E-02 |
| PTPRM   | -0.1021 | 4.95E-02 | 1.07E-01 |
| PTPRN2  | -0.1704 | 9.86E-04 | 4.25E-03 |
| PTPRN   | 0.0655  | 2.08E-01 | 3.27E-01 |
| PTPRO   | 0.0034  | 9.48E-01 | 9.68E-01 |
| PTPRQ   | -0.0541 | 2.99E-01 | 4.28E-01 |
| PTPRR   | -0.0364 | 4.84E-01 | 6.12E-01 |
| PTPRS   | -0.0211 | 6.86E-01 | 7.82E-01 |
| PTPRT   | 0.1148  | 2.70E-02 | 6.56E-02 |
| PTPRU   | -0.0798 | 1.25E-01 | 2.21E-01 |
| PTPRVP  | 0.0805  | 1.22E-01 | 2.17E-01 |
| PTPRZ1  | -0.0911 | 7.97E-02 | 1.55E-01 |
| PTRF    | -0.1270 | 1.43E-02 | 3.93E-02 |



|         |         |          |          |
|---------|---------|----------|----------|
| PTRH1   | -0.1204 | 2.04E-02 | 5.21E-02 |
| PTRH2   | 0.1710  | 9.40E-04 | 4.08E-03 |
| PTS     | -0.1103 | 3.37E-02 | 7.86E-02 |
| PTTG1IP | 0.0581  | 2.65E-01 | 3.92E-01 |
| PTTG1   | 0.4092  | 2.07E-16 | 1.92E-14 |
| PTTG2   | 0.2630  | 2.76E-07 | 3.63E-06 |
| PTTG3P  | 0.3662  | 3.25E-13 | 1.58E-11 |
| PTX3    | -0.0353 | 4.98E-01 | 6.25E-01 |
| PTX4    | 0.0178  | 7.33E-01 | 8.19E-01 |
| PUF60   | 0.0806  | 1.21E-01 | 2.16E-01 |
| PUM1    | 0.0223  | 6.68E-01 | 7.68E-01 |
| PUM2    | 0.1456  | 4.96E-03 | 1.64E-02 |
| PURA    | -0.0349 | 5.02E-01 | 6.28E-01 |
| PURB    | 0.2734  | 8.79E-08 | 1.29E-06 |
| PURG    | -0.0623 | 2.31E-01 | 3.54E-01 |
| PUS10   | -0.3070 | 1.55E-09 | 3.54E-08 |
| PUS1    | 0.1390  | 7.35E-03 | 2.27E-02 |
| PUS3    | -0.1124 | 3.05E-02 | 7.23E-02 |
| PUS7L   | 0.1108  | 3.28E-02 | 7.69E-02 |
| PUS7    | 0.1479  | 4.30E-03 | 1.46E-02 |
| PUSL1   | 0.0371  | 4.76E-01 | 6.05E-01 |
| PVALB   | -0.1167 | 2.46E-02 | 6.08E-02 |
| PVRIG   | 0.0390  | 4.54E-01 | 5.85E-01 |
| PVRL1   | 0.2579  | 4.75E-07 | 5.85E-06 |
| PVRL2   | 0.0861  | 9.78E-02 | 1.83E-01 |
| PVRL3   | -0.0612 | 2.40E-01 | 3.64E-01 |
| PVRL4   | 0.1405  | 6.73E-03 | 2.11E-02 |
| PVR     | -0.0303 | 5.61E-01 | 6.79E-01 |
| PVT1    | 0.1890  | 2.51E-04 | 1.34E-03 |
| PWP1    | 0.1636  | 1.57E-03 | 6.29E-03 |
| PWP2    | 0.2255  | 1.15E-05 | 9.52E-05 |
| PWRN1   | -0.0870 | 9.42E-02 | 1.77E-01 |
| PWRN2   | -0.0399 | 4.44E-01 | 5.75E-01 |
| PWWP2A  | 0.1346  | 9.46E-03 | 2.80E-02 |
| PWWP2B  | 0.1159  | 2.55E-02 | 6.26E-02 |
| PXDNL   | -0.0849 | 1.03E-01 | 1.89E-01 |
| PXDN    | -0.0546 | 2.94E-01 | 4.23E-01 |
| PXK     | 0.0125  | 8.11E-01 | 8.76E-01 |
| PXMP2   | -0.2389 | 3.28E-06 | 3.21E-05 |
| PXMP4   | -0.1132 | 2.92E-02 | 7.00E-02 |
| PXN     | 0.0123  | 8.13E-01 | 8.77E-01 |
| PXT1    | 0.0878  | 9.13E-02 | 1.73E-01 |
| PYCARD  | 0.1558  | 2.62E-03 | 9.64E-03 |
| PYCR1   | 0.1761  | 6.58E-04 | 3.00E-03 |

|           |         |          |          |
|-----------|---------|----------|----------|
| PYCR2     | 0.2902  | 1.25E-08 | 2.26E-07 |
| PYCRL     | -0.0284 | 5.86E-01 | 7.01E-01 |
| PYDC1     | 0.1957  | 1.49E-04 | 8.57E-04 |
| PYDC2     | 0.0584  | 2.62E-01 | 3.88E-01 |
| PYGB      | 0.0321  | 5.38E-01 | 6.60E-01 |
| PYGL      | -0.1463 | 4.76E-03 | 1.58E-02 |
| PYGM      | -0.0920 | 7.68E-02 | 1.51E-01 |
| PYGO1     | -0.1052 | 4.28E-02 | 9.51E-02 |
| PYGO2     | 0.5946  | 7.73E-37 | 1.54E-33 |
| PYHIN1    | -0.0781 | 1.33E-01 | 2.32E-01 |
| PYROXD1   | 0.0761  | 1.43E-01 | 2.45E-01 |
| PYROXD2   | -0.0624 | 2.31E-01 | 3.53E-01 |
| PYY2      | 0.2332  | 5.65E-06 | 5.14E-05 |
| PYY       | 0.0688  | 1.86E-01 | 2.99E-01 |
| PZP       | -0.0415 | 4.25E-01 | 5.58E-01 |
| ProSAPiP1 | 0.0374  | 4.73E-01 | 6.02E-01 |
| QARS      | 0.0183  | 7.25E-01 | 8.13E-01 |
| QDPR      | -0.3739 | 9.40E-14 | 4.98E-12 |
| QKI       | 0.0703  | 1.77E-01 | 2.88E-01 |
| QPCTL     | 0.0813  | 1.18E-01 | 2.11E-01 |
| QPCT      | 0.0015  | 9.78E-01 | 9.86E-01 |
| QPRT      | -0.1826 | 4.07E-04 | 2.01E-03 |
| QRFPR     | -0.1899 | 2.35E-04 | 1.27E-03 |
| QRFP      | 0.0826  | 1.12E-01 | 2.03E-01 |
| QRICH1    | 0.1869  | 2.94E-04 | 1.54E-03 |
| QRICH2    | 0.1886  | 2.58E-04 | 1.37E-03 |
| QRSL1     | 0.2516  | 9.12E-07 | 1.04E-05 |
| QSER1     | 0.3043  | 2.17E-09 | 4.76E-08 |
| QSOX1     | 0.1581  | 2.25E-03 | 8.51E-03 |
| QSOX2     | 0.2684  | 1.53E-07 | 2.13E-06 |
| QTRT1     | -0.0783 | 1.32E-01 | 2.30E-01 |
| QTRTD1    | 0.1602  | 1.96E-03 | 7.57E-03 |
| R3HCC1    | 0.0165  | 7.51E-01 | 8.32E-01 |
| R3HDM1    | 0.1968  | 1.36E-04 | 7.96E-04 |
| R3HDM2    | 0.0406  | 4.35E-01 | 5.67E-01 |
| R3HDML    | -0.0619 | 2.34E-01 | 3.57E-01 |
| RAB10     | 0.0527  | 3.11E-01 | 4.40E-01 |
| RAB11A    | -0.0101 | 8.46E-01 | 9.00E-01 |
| RAB11B    | -0.1446 | 5.27E-03 | 1.72E-02 |
| RAB11FIP1 | 0.2071  | 5.85E-05 | 3.87E-04 |
| RAB11FIP2 | -0.0234 | 6.53E-01 | 7.56E-01 |
| RAB11FIP3 | -0.0305 | 5.58E-01 | 6.77E-01 |
| RAB11FIP4 | 0.2823  | 3.17E-08 | 5.19E-07 |
| RAB11FIP5 | 0.0534  | 3.05E-01 | 4.35E-01 |

|          |         |          |          |
|----------|---------|----------|----------|
| RAB12    | -0.1037 | 4.59E-02 | 1.01E-01 |
| RAB13    | 0.1476  | 4.40E-03 | 1.49E-02 |
| RAB14    | 0.0225  | 6.65E-01 | 7.65E-01 |
| RAB15    | 0.1680  | 1.16E-03 | 4.87E-03 |
| RAB17    | -0.1341 | 9.73E-03 | 2.86E-02 |
| RAB18    | -0.1268 | 1.45E-02 | 3.97E-02 |
| RAB19    | 0.0023  | 9.66E-01 | 9.79E-01 |
| RAB1A    | -0.0331 | 5.25E-01 | 6.48E-01 |
| RAB1B    | -0.1617 | 1.78E-03 | 6.99E-03 |
| RAB20    | -0.0274 | 5.99E-01 | 7.12E-01 |
| RAB21    | -0.1005 | 5.31E-02 | 1.13E-01 |
| RAB22A   | 0.0257  | 6.22E-01 | 7.31E-01 |
| RAB23    | 0.1039  | 4.56E-02 | 1.00E-01 |
| RAB24    | 0.1394  | 7.17E-03 | 2.22E-02 |
| RAB25    | 0.0326  | 5.32E-01 | 6.54E-01 |
| RAB26    | -0.2056 | 6.61E-05 | 4.29E-04 |
| RAB27A   | -0.0092 | 8.60E-01 | 9.09E-01 |
| RAB27B   | 0.0277  | 5.94E-01 | 7.08E-01 |
| RAB28    | 0.2111  | 4.15E-05 | 2.89E-04 |
| RAB2A    | -0.1308 | 1.17E-02 | 3.32E-02 |
| RAB2B    | -0.0320 | 5.39E-01 | 6.61E-01 |
| RAB30    | -0.1361 | 8.66E-03 | 2.60E-02 |
| RAB31    | -0.0619 | 2.34E-01 | 3.57E-01 |
| RAB32    | 0.1101  | 3.40E-02 | 7.93E-02 |
| RAB33A   | -0.0132 | 8.01E-01 | 8.68E-01 |
| RAB33B   | -0.1248 | 1.62E-02 | 4.32E-02 |
| RAB34    | 0.1077  | 3.81E-02 | 8.68E-02 |
| RAB35    | 0.1748  | 7.23E-04 | 3.25E-03 |
| RAB36    | 0.1004  | 5.33E-02 | 1.13E-01 |
| RAB37    | -0.1321 | 1.09E-02 | 3.13E-02 |
| RAB38    | 0.0529  | 3.09E-01 | 4.39E-01 |
| RAB39B   | -0.0039 | 9.41E-01 | 9.63E-01 |
| RAB39    | 0.0820  | 1.15E-01 | 2.08E-01 |
| RAB3A    | 0.0128  | 8.05E-01 | 8.71E-01 |
| RAB3B    | 0.1695  | 1.05E-03 | 4.47E-03 |
| RAB3C    | 0.0103  | 8.44E-01 | 8.98E-01 |
| RAB3D    | 0.1054  | 4.24E-02 | 9.44E-02 |
| RAB3GAP1 | 0.0395  | 4.48E-01 | 5.79E-01 |
| RAB3GAP2 | 0.1966  | 1.38E-04 | 8.03E-04 |
| RAB3IL1  | 0.0439  | 3.99E-01 | 5.32E-01 |
| RAB3IP   | 0.1762  | 6.54E-04 | 2.99E-03 |
| RAB40AL  | 0.2850  | 2.30E-08 | 3.90E-07 |
| RAB40A   | 0.2474  | 1.41E-06 | 1.53E-05 |
| RAB40B   | 0.1556  | 2.65E-03 | 9.75E-03 |

|          |         |          |          |
|----------|---------|----------|----------|
| RAB40C   | 0.1332  | 1.02E-02 | 2.97E-02 |
| RAB41    | 0.2044  | 7.33E-05 | 4.69E-04 |
| RAB42    | 0.1736  | 7.88E-04 | 3.51E-03 |
| RAB43    | -0.1372 | 8.16E-03 | 2.47E-02 |
| RAB4A    | 0.0810  | 1.19E-01 | 2.13E-01 |
| RAB4B    | -0.0160 | 7.59E-01 | 8.38E-01 |
| RAB5A    | -0.1575 | 2.34E-03 | 8.77E-03 |
| RAB5B    | -0.1078 | 3.79E-02 | 8.64E-02 |
| RAB5C    | 0.0563  | 2.80E-01 | 4.08E-01 |
| RAB6A    | -0.1106 | 3.32E-02 | 7.77E-02 |
| RAB6B    | 0.1038  | 4.58E-02 | 1.00E-01 |
| RAB6C    | -0.0961 | 6.44E-02 | 1.31E-01 |
| RAB7A    | -0.1429 | 5.84E-03 | 1.87E-02 |
| RAB7L1   | 0.0983  | 5.85E-02 | 1.22E-01 |
| RAB8A    | -0.1778 | 5.81E-04 | 2.70E-03 |
| RAB8B    | 0.0134  | 7.97E-01 | 8.65E-01 |
| RAB9A    | -0.0206 | 6.93E-01 | 7.88E-01 |
| RAB9BP1  | 0.0061  | 9.08E-01 | 9.42E-01 |
| RAB9B    | 0.0759  | 1.44E-01 | 2.46E-01 |
| RABAC1   | -0.0705 | 1.75E-01 | 2.86E-01 |
| RABEP1   | -0.1537 | 3.00E-03 | 1.08E-02 |
| RABEP2   | 0.0217  | 6.77E-01 | 7.76E-01 |
| RABEPK   | -0.1408 | 6.60E-03 | 2.08E-02 |
| RABGAP1L | 0.1930  | 1.84E-04 | 1.03E-03 |
| RABGAP1  | 0.0921  | 7.64E-02 | 1.50E-01 |
| RABGEF1  | -0.0142 | 7.84E-01 | 8.57E-01 |
| RABGGTA  | -0.1039 | 4.54E-02 | 9.97E-02 |
| RABGGTB  | 0.0097  | 8.53E-01 | 9.05E-01 |
| RABIF    | 0.3038  | 2.33E-09 | 5.05E-08 |
| RABL2A   | 0.2119  | 3.87E-05 | 2.73E-04 |
| RABL2B   | 0.1310  | 1.15E-02 | 3.28E-02 |
| RABL3    | -0.0939 | 7.09E-02 | 1.42E-01 |
| RABL5    | -0.0120 | 8.17E-01 | 8.80E-01 |
| RAC1     | 0.0618  | 2.35E-01 | 3.58E-01 |
| RAC2     | -0.0163 | 7.54E-01 | 8.35E-01 |
| RAC3     | 0.0044  | 9.32E-01 | 9.58E-01 |
| RACGAP1P | 0.3290  | 8.23E-11 | 2.46E-09 |
| RACGAP1  | 0.4384  | 7.38E-19 | 1.38E-16 |
| RAD17    | -0.0714 | 1.70E-01 | 2.79E-01 |
| RAD18    | 0.1973  | 1.31E-04 | 7.67E-04 |
| RAD1     | 0.3833  | 1.98E-14 | 1.22E-12 |
| RAD21L1  | -0.0203 | 6.97E-01 | 7.91E-01 |
| RAD21    | 0.1123  | 3.05E-02 | 7.25E-02 |
| RAD23A   | 0.0629  | 2.27E-01 | 3.49E-01 |

|          |         |          |          |
|----------|---------|----------|----------|
| RAD23B   | 0.0528  | 3.11E-01 | 4.40E-01 |
| RAD50    | -0.0619 | 2.35E-01 | 3.58E-01 |
| RAD51AP1 | 0.3616  | 6.62E-13 | 3.05E-11 |
| RAD51AP2 | 0.0158  | 7.62E-01 | 8.39E-01 |
| RAD51C   | 0.3766  | 6.04E-14 | 3.32E-12 |
| RAD51L1  | 0.0511  | 3.26E-01 | 4.57E-01 |
| RAD51L3  | 0.2389  | 3.26E-06 | 3.20E-05 |
| RAD51    | 0.3777  | 4.99E-14 | 2.81E-12 |
| RAD52    | 0.1773  | 6.04E-04 | 2.79E-03 |
| RAD54B   | 0.3530  | 2.52E-12 | 1.04E-10 |
| RAD54L2  | -0.1260 | 1.52E-02 | 4.11E-02 |
| RAD54L   | 0.4299  | 4.06E-18 | 5.99E-16 |
| RAD9A    | 0.3201  | 2.75E-10 | 7.46E-09 |
| RAD9B    | 0.0881  | 9.01E-02 | 1.71E-01 |
| RADIL    | 0.0927  | 7.44E-02 | 1.47E-01 |
| RAE1     | 0.3200  | 2.80E-10 | 7.57E-09 |
| RAET1E   | 0.0588  | 2.58E-01 | 3.84E-01 |
| RAET1G   | 0.1050  | 4.32E-02 | 9.58E-02 |
| RAET1K   | 0.2590  | 4.22E-07 | 5.28E-06 |
| RAET1L   | 0.0536  | 3.03E-01 | 4.33E-01 |
| RAF1     | -0.0258 | 6.20E-01 | 7.30E-01 |
| RAG1AP1  | 0.3343  | 3.86E-11 | 1.25E-09 |
| RAG1     | -0.0995 | 5.56E-02 | 1.17E-01 |
| RAG2     | 0.0163  | 7.55E-01 | 8.35E-01 |
| RAGE     | 0.1798  | 5.01E-04 | 2.38E-03 |
| RAI14    | 0.1897  | 2.38E-04 | 1.28E-03 |
| RAI1     | 0.1196  | 2.12E-02 | 5.39E-02 |
| RAI2     | -0.1615 | 1.81E-03 | 7.07E-03 |
| RALA     | 0.0763  | 1.43E-01 | 2.44E-01 |
| RALBP1   | -0.0803 | 1.23E-01 | 2.18E-01 |
| RALB     | -0.0835 | 1.08E-01 | 1.98E-01 |
| RALGAPA1 | -0.0089 | 8.64E-01 | 9.12E-01 |
| RALGAPA2 | -0.0998 | 5.48E-02 | 1.16E-01 |
| RALGAPB  | 0.1563  | 2.54E-03 | 9.39E-03 |
| RALGDS   | 0.0409  | 4.32E-01 | 5.64E-01 |
| RALGPS1  | 0.0345  | 5.08E-01 | 6.33E-01 |
| RALGPS2  | 0.0488  | 3.49E-01 | 4.81E-01 |
| RALYL    | -0.0605 | 2.45E-01 | 3.69E-01 |
| RALY     | 0.1811  | 4.57E-04 | 2.21E-03 |
| RAMP1    | -0.1678 | 1.18E-03 | 4.95E-03 |
| RAMP2    | -0.1519 | 3.36E-03 | 1.19E-02 |
| RAMP3    | -0.3340 | 4.08E-11 | 1.31E-09 |
| RANBP10  | -0.1258 | 1.53E-02 | 4.13E-02 |
| RANBP17  | 0.0160  | 7.59E-01 | 8.38E-01 |

|          |         |          |          |
|----------|---------|----------|----------|
| RANBP1   | 0.2435  | 2.08E-06 | 2.16E-05 |
| RANBP2   | 0.0784  | 1.32E-01 | 2.30E-01 |
| RANBP3L  | -0.3190 | 3.21E-10 | 8.58E-09 |
| RANBP3   | 0.1036  | 4.62E-02 | 1.01E-01 |
| RANBP6   | 0.0123  | 8.13E-01 | 8.77E-01 |
| RANBP9   | -0.0137 | 7.92E-01 | 8.62E-01 |
| RANGAP1  | 0.1353  | 9.06E-03 | 2.70E-02 |
| RANGRF   | 0.1093  | 3.53E-02 | 8.16E-02 |
| RAN      | 0.2334  | 5.52E-06 | 5.03E-05 |
| RAP1A    | -0.1332 | 1.02E-02 | 2.97E-02 |
| RAP1B    | 0.0563  | 2.80E-01 | 4.08E-01 |
| RAP1GAP2 | 0.0267  | 6.08E-01 | 7.20E-01 |
| RAP1GAP  | 0.1060  | 4.13E-02 | 9.24E-02 |
| RAP1GDS1 | -0.2146 | 3.08E-05 | 2.24E-04 |
| RAP2A    | 0.1764  | 6.45E-04 | 2.95E-03 |
| RAP2B    | 0.0379  | 4.66E-01 | 5.96E-01 |
| RAP2C    | -0.0239 | 6.47E-01 | 7.51E-01 |
| RAPGEF1  | 0.0560  | 2.82E-01 | 4.11E-01 |
| RAPGEF2  | -0.2190 | 2.08E-05 | 1.60E-04 |
| RAPGEF3  | -0.1290 | 1.29E-02 | 3.59E-02 |
| RAPGEF4  | -0.2065 | 6.16E-05 | 4.04E-04 |
| RAPGEF5  | -0.0371 | 4.76E-01 | 6.05E-01 |
| RAPGEF6  | -0.0752 | 1.48E-01 | 2.52E-01 |
| RAPGEFL1 | 0.1808  | 4.65E-04 | 2.24E-03 |
| RAPH1    | -0.0977 | 6.01E-02 | 1.24E-01 |
| RAPSN    | 0.0701  | 1.78E-01 | 2.89E-01 |
| RARA     | 0.1553  | 2.71E-03 | 9.93E-03 |
| RARB     | -0.1135 | 2.88E-02 | 6.93E-02 |
| RARG     | -0.0329 | 5.28E-01 | 6.51E-01 |
| RARRES1  | -0.0590 | 2.57E-01 | 3.83E-01 |
| RARRES2  | -0.0901 | 8.31E-02 | 1.60E-01 |
| RARRES3  | -0.0901 | 8.32E-02 | 1.61E-01 |
| RARS2    | 0.1869  | 2.94E-04 | 1.53E-03 |
| RARS     | 0.0740  | 1.55E-01 | 2.60E-01 |
| RASA1    | -0.0409 | 4.32E-01 | 5.64E-01 |
| RASA2    | 0.0272  | 6.02E-01 | 7.14E-01 |
| RASA3    | 0.0000  | 1.00E+00 | 1.00E+00 |
| RASA4P   | 0.0163  | 7.54E-01 | 8.35E-01 |
| RASA4    | -0.0070 | 8.92E-01 | 9.31E-01 |
| RASAL1   | 0.2598  | 3.88E-07 | 4.90E-06 |
| RASAL2   | 0.1264  | 1.49E-02 | 4.05E-02 |
| RASAL3   | -0.0456 | 3.81E-01 | 5.14E-01 |
| RASD1    | -0.0285 | 5.84E-01 | 7.00E-01 |
| RASD2    | 0.0151  | 7.72E-01 | 8.47E-01 |

|          |         |          |          |
|----------|---------|----------|----------|
| RASEF    | 0.1226  | 1.81E-02 | 4.75E-02 |
| RASGEF1A | 0.1546  | 2.83E-03 | 1.03E-02 |
| RASGEF1B | -0.1093 | 3.54E-02 | 8.17E-02 |
| RASGEF1C | 0.1594  | 2.07E-03 | 7.94E-03 |
| RASGRF1  | -0.0196 | 7.07E-01 | 7.99E-01 |
| RASGRF2  | -0.1212 | 1.96E-02 | 5.05E-02 |
| RASGRP1  | -0.0671 | 1.97E-01 | 3.13E-01 |
| RASGRP2  | -0.0939 | 7.08E-02 | 1.42E-01 |
| RASGRP3  | -0.0542 | 2.98E-01 | 4.27E-01 |
| RASGRP4  | -0.1731 | 8.11E-04 | 3.59E-03 |
| RASIP1   | -0.1463 | 4.76E-03 | 1.58E-02 |
| RASL10A  | -0.0314 | 5.47E-01 | 6.68E-01 |
| RASL10B  | 0.0030  | 9.54E-01 | 9.72E-01 |
| RASL11A  | -0.0145 | 7.80E-01 | 8.53E-01 |
| RASL11B  | -0.0252 | 6.28E-01 | 7.37E-01 |
| RASL12   | 0.0371  | 4.77E-01 | 6.05E-01 |
| RASSF10  | 0.0646  | 2.14E-01 | 3.34E-01 |
| RASSF1   | 0.2119  | 3.90E-05 | 2.74E-04 |
| RASSF2   | -0.1119 | 3.12E-02 | 7.38E-02 |
| RASSF3   | 0.0669  | 1.98E-01 | 3.15E-01 |
| RASSF4   | 0.1531  | 3.11E-03 | 1.11E-02 |
| RASSF5   | -0.0225 | 6.66E-01 | 7.66E-01 |
| RASSF6   | 0.0089  | 8.65E-01 | 9.13E-01 |
| RASSF7   | 0.1894  | 2.44E-04 | 1.30E-03 |
| RASSF8   | 0.0355  | 4.95E-01 | 6.21E-01 |
| RASSF9   | 0.0180  | 7.29E-01 | 8.16E-01 |
| RAVER1   | 0.2501  | 1.07E-06 | 1.20E-05 |
| RAVER2   | 0.1824  | 4.13E-04 | 2.03E-03 |
| RAX2     | 0.0564  | 2.79E-01 | 4.07E-01 |
| RAX      | 0.0388  | 4.56E-01 | 5.87E-01 |
| RB1CC1   | -0.0314 | 5.47E-01 | 6.67E-01 |
| RB1      | -0.1638 | 1.54E-03 | 6.20E-03 |
| RBAK     | 0.0161  | 7.57E-01 | 8.37E-01 |
| RBBP4    | 0.1093  | 3.53E-02 | 8.16E-02 |
| RBBP5    | 0.1151  | 2.66E-02 | 6.49E-02 |
| RBBP6    | 0.1180  | 2.30E-02 | 5.76E-02 |
| RBBP7    | 0.2321  | 6.23E-06 | 5.61E-05 |
| RBBP8    | 0.2290  | 8.39E-06 | 7.18E-05 |
| RBBP9    | -0.1897 | 2.38E-04 | 1.28E-03 |
| RBCK1    | 0.1835  | 3.81E-04 | 1.90E-03 |
| RBKS     | -0.1987 | 1.16E-04 | 6.94E-04 |
| RBL1     | 0.2858  | 2.09E-08 | 3.60E-07 |
| RBL2     | -0.2387 | 3.32E-06 | 3.25E-05 |
| RBM10    | 0.3553  | 1.78E-12 | 7.49E-11 |

|        |         |          |          |
|--------|---------|----------|----------|
| RBM11  | 0.0972  | 6.16E-02 | 1.27E-01 |
| RBM12B | 0.2983  | 4.64E-09 | 9.37E-08 |
| RBM12  | 0.2730  | 9.15E-08 | 1.34E-06 |
| RBM14  | 0.4759  | 2.30E-22 | 8.50E-20 |
| RBM15B | 0.2091  | 4.93E-05 | 3.34E-04 |
| RBM15  | 0.1331  | 1.03E-02 | 2.99E-02 |
| RBM16  | 0.1861  | 3.13E-04 | 1.62E-03 |
| RBM17  | 0.2599  | 3.83E-07 | 4.84E-06 |
| RBM18  | 0.0645  | 2.15E-01 | 3.35E-01 |
| RBM19  | 0.0544  | 2.96E-01 | 4.26E-01 |
| RBM20  | -0.0671 | 1.97E-01 | 3.13E-01 |
| RBM22  | 0.1962  | 1.42E-04 | 8.26E-04 |
| RBM23  | -0.0393 | 4.50E-01 | 5.82E-01 |
| RBM24  | 0.0366  | 4.82E-01 | 6.11E-01 |
| RBM25  | 0.1555  | 2.67E-03 | 9.79E-03 |
| RBM26  | 0.1886  | 2.59E-04 | 1.37E-03 |
| RBM27  | -0.0419 | 4.21E-01 | 5.54E-01 |
| RBM28  | 0.1248  | 1.61E-02 | 4.31E-02 |
| RBM33  | 0.2187  | 2.14E-05 | 1.64E-04 |
| RBM34  | 0.3491  | 4.49E-12 | 1.76E-10 |
| RBM38  | 0.2171  | 2.46E-05 | 1.85E-04 |
| RBM39  | 0.3666  | 3.04E-13 | 1.49E-11 |
| RBM3   | 0.2126  | 3.65E-05 | 2.59E-04 |
| RBM41  | 0.1377  | 7.92E-03 | 2.41E-02 |
| RBM42  | 0.1196  | 2.12E-02 | 5.39E-02 |
| RBM43  | -0.1320 | 1.09E-02 | 3.14E-02 |
| RBM44  | -0.0791 | 1.28E-01 | 2.25E-01 |
| RBM45  | 0.0868  | 9.52E-02 | 1.79E-01 |
| RBM46  | 0.0821  | 1.14E-01 | 2.07E-01 |
| RBM47  | -0.0197 | 7.06E-01 | 7.98E-01 |
| RBM4B  | 0.2994  | 4.05E-09 | 8.33E-08 |
| RBM4   | 0.2068  | 5.97E-05 | 3.93E-04 |
| RBM5   | 0.3261  | 1.22E-10 | 3.52E-09 |
| RBM6   | 0.2901  | 1.26E-08 | 2.28E-07 |
| RBM7   | -0.0153 | 7.69E-01 | 8.44E-01 |
| RBM8A  | 0.4895  | 9.53E-24 | 4.22E-21 |
| RBM9   | 0.0399  | 4.43E-01 | 5.75E-01 |
| RBMS1  | -0.0073 | 8.89E-01 | 9.29E-01 |
| RBMS2  | -0.0116 | 8.24E-01 | 8.85E-01 |
| RBMS3  | -0.1866 | 3.01E-04 | 1.56E-03 |
| RBMX2  | 0.3006  | 3.46E-09 | 7.21E-08 |
| RBMXL1 | 0.1176  | 2.35E-02 | 5.86E-02 |
| RBMXL2 | 0.0569  | 2.75E-01 | 4.03E-01 |
| RBMXL3 | 0.0367  | 4.81E-01 | 6.09E-01 |



|          |         |          |          |
|----------|---------|----------|----------|
| RBMX     | 0.5425  | 8.89E-30 | 7.38E-27 |
| RBMY1A1  | -0.0320 | 5.39E-01 | 6.61E-01 |
| RBMY1A3P | 0.0942  | 6.98E-02 | 1.40E-01 |
| RBMY1B   | -0.0292 | 5.75E-01 | 6.92E-01 |
| RBMY1E   | -0.0906 | 8.14E-02 | 1.58E-01 |
| RBMY1F   | 0.0110  | 8.33E-01 | 8.91E-01 |
| RBMY1J   | -0.0142 | 7.86E-01 | 8.58E-01 |
| RBMY2EP  | -0.0078 | 8.80E-01 | 9.23E-01 |
| RBMY2FP  | -0.0343 | 5.10E-01 | 6.34E-01 |
| RBMY3AP  | 0.0497  | 3.40E-01 | 4.71E-01 |
| RBP1     | 0.0074  | 8.87E-01 | 9.28E-01 |
| RBP2     | 0.0326  | 5.31E-01 | 6.54E-01 |
| RBP3     | 0.1584  | 2.21E-03 | 8.35E-03 |
| RBP4     | -0.2440 | 1.98E-06 | 2.08E-05 |
| RBP5     | -0.2427 | 2.25E-06 | 2.31E-05 |
| RBP7     | -0.1560 | 2.58E-03 | 9.51E-03 |
| RBPJL    | 0.0793  | 1.27E-01 | 2.24E-01 |
| RBPJ     | 0.0894  | 8.53E-02 | 1.64E-01 |
| RBPMS2   | -0.1076 | 3.84E-02 | 8.73E-02 |
| RBPMS    | -0.0552 | 2.89E-01 | 4.18E-01 |
| RBX1     | 0.1215  | 1.92E-02 | 4.97E-02 |
| RC3H1    | 0.2292  | 8.20E-06 | 7.04E-05 |
| RC3H2    | -0.1285 | 1.32E-02 | 3.68E-02 |
| RCAN1    | -0.3382 | 2.24E-11 | 7.50E-10 |
| RCAN2    | -0.1229 | 1.79E-02 | 4.69E-02 |
| RCAN3    | 0.0557  | 2.84E-01 | 4.13E-01 |
| RCBTB1   | -0.0310 | 5.51E-01 | 6.71E-01 |
| RCBTB2   | -0.2018 | 9.06E-05 | 5.61E-04 |
| RCC1     | 0.1218  | 1.89E-02 | 4.91E-02 |
| RCC2     | 0.3108  | 9.43E-10 | 2.24E-08 |
| RCCD1    | 0.2065  | 6.13E-05 | 4.02E-04 |
| RCE1     | 0.2745  | 7.78E-08 | 1.16E-06 |
| RCHY1    | -0.0631 | 2.25E-01 | 3.47E-01 |
| RCL1     | -0.2050 | 6.98E-05 | 4.49E-04 |
| RCN1     | -0.0768 | 1.40E-01 | 2.41E-01 |
| RCN2     | 0.1965  | 1.39E-04 | 8.08E-04 |
| RCN3     | 0.0283  | 5.86E-01 | 7.02E-01 |
| RCOR1    | 0.0227  | 6.63E-01 | 7.64E-01 |
| RCOR2    | 0.2232  | 1.43E-05 | 1.16E-04 |
| RCOR3    | 0.2977  | 4.95E-09 | 9.90E-08 |
| RCSD1    | -0.0922 | 7.61E-02 | 1.50E-01 |
| RCVRN    | -0.0498 | 3.39E-01 | 4.70E-01 |
| RD3      | 0.0116  | 8.24E-01 | 8.85E-01 |
| RDBP     | 0.2744  | 7.79E-08 | 1.16E-06 |

|        |         |          |          |
|--------|---------|----------|----------|
| RDH10  | -0.0365 | 4.83E-01 | 6.11E-01 |
| RDH11  | -0.3582 | 1.13E-12 | 4.98E-11 |
| RDH12  | 0.0429  | 4.10E-01 | 5.43E-01 |
| RDH13  | -0.1298 | 1.23E-02 | 3.47E-02 |
| RDH14  | -0.1861 | 3.13E-04 | 1.62E-03 |
| RDH16  | -0.2130 | 3.54E-05 | 2.53E-04 |
| RDH5   | -0.3779 | 4.87E-14 | 2.76E-12 |
| RDH8   | 0.0811  | 1.19E-01 | 2.13E-01 |
| RDM1   | 0.3288  | 8.44E-11 | 2.51E-09 |
| RDX    | -0.0754 | 1.47E-01 | 2.50E-01 |
| REC8   | 0.1164  | 2.50E-02 | 6.15E-02 |
| RECK   | 0.0256  | 6.23E-01 | 7.32E-01 |
| RECQL4 | 0.3699  | 1.79E-13 | 9.19E-12 |
| RECQL5 | 0.2762  | 6.41E-08 | 9.74E-07 |
| RECQL  | 0.1121  | 3.08E-02 | 7.30E-02 |
| REEP1  | 0.0006  | 9.91E-01 | 9.95E-01 |
| REEP2  | 0.0709  | 1.73E-01 | 2.83E-01 |
| REEP3  | -0.1708 | 9.59E-04 | 4.16E-03 |
| REEP4  | 0.1314  | 1.13E-02 | 3.22E-02 |
| REEP5  | -0.3426 | 1.17E-11 | 4.12E-10 |
| REEP6  | -0.1818 | 4.32E-04 | 2.10E-03 |
| REG1A  | 0.0100  | 8.48E-01 | 9.01E-01 |
| REG1B  | -0.0407 | 4.35E-01 | 5.66E-01 |
| REG1P  | -0.0469 | 3.68E-01 | 5.01E-01 |
| REG3A  | 0.0081  | 8.77E-01 | 9.21E-01 |
| REG3G  | 0.0427  | 4.12E-01 | 5.45E-01 |
| REG4   | 0.1490  | 4.02E-03 | 1.38E-02 |
| RELA   | 0.0547  | 2.93E-01 | 4.23E-01 |
| RELB   | 0.2130  | 3.51E-05 | 2.51E-04 |
| RELL1  | 0.1134  | 2.89E-02 | 6.94E-02 |
| RELL2  | 0.0819  | 1.15E-01 | 2.08E-01 |
| RELN   | 0.0111  | 8.32E-01 | 8.90E-01 |
| RELT   | 0.1625  | 1.69E-03 | 6.68E-03 |
| REL    | -0.0311 | 5.51E-01 | 6.71E-01 |
| REM1   | -0.1072 | 3.90E-02 | 8.83E-02 |
| REM2   | 0.2305  | 7.27E-06 | 6.38E-05 |
| RENBP  | 0.0596  | 2.52E-01 | 3.78E-01 |
| REN    | -0.0823 | 1.13E-01 | 2.05E-01 |
| REP15  | 0.1472  | 4.50E-03 | 1.51E-02 |
| REPIN1 | -0.0024 | 9.63E-01 | 9.77E-01 |
| REPS1  | 0.0860  | 9.80E-02 | 1.83E-01 |
| REPS2  | -0.1590 | 2.13E-03 | 8.10E-03 |
| RER1   | -0.1675 | 1.20E-03 | 5.02E-03 |
| RERE   | 0.1315  | 1.12E-02 | 3.21E-02 |

|         |         |          |          |
|---------|---------|----------|----------|
| RERGL   | -0.1298 | 1.24E-02 | 3.48E-02 |
| RERG    | -0.0940 | 7.05E-02 | 1.41E-01 |
| RESP18  | 0.0004  | 9.93E-01 | 9.96E-01 |
| REST    | -0.0802 | 1.23E-01 | 2.18E-01 |
| RETNLB  | 0.0677  | 1.93E-01 | 3.08E-01 |
| RETN    | 0.0498  | 3.39E-01 | 4.70E-01 |
| RETSAT  | -0.3755 | 7.20E-14 | 3.91E-12 |
| RET     | -0.1494 | 3.92E-03 | 1.35E-02 |
| REV1    | 0.1851  | 3.37E-04 | 1.72E-03 |
| REV3L   | -0.0262 | 6.14E-01 | 7.24E-01 |
| REXO1L1 | 0.0055  | 9.15E-01 | 9.47E-01 |
| REXO1   | 0.0922  | 7.60E-02 | 1.50E-01 |
| REXO2   | -0.1047 | 4.39E-02 | 9.70E-02 |
| REXO4   | 0.1802  | 4.87E-04 | 2.32E-03 |
| RFC1    | 0.1195  | 2.13E-02 | 5.40E-02 |
| RFC2    | 0.2405  | 2.78E-06 | 2.78E-05 |
| RFC3    | 0.2779  | 5.26E-08 | 8.14E-07 |
| RFC4    | 0.4967  | 1.64E-24 | 8.81E-22 |
| RFC5    | 0.3227  | 1.93E-10 | 5.39E-09 |
| RFESD   | 0.0567  | 2.76E-01 | 4.04E-01 |
| RFFL    | -0.0420 | 4.19E-01 | 5.52E-01 |
| RFK     | -0.0180 | 7.30E-01 | 8.17E-01 |
| RFNG    | -0.0685 | 1.88E-01 | 3.01E-01 |
| RFPL1S  | 0.0680  | 1.91E-01 | 3.05E-01 |
| RFPL1   | 0.1036  | 4.61E-02 | 1.01E-01 |
| RFPL2   | 0.0371  | 4.76E-01 | 6.05E-01 |
| RFPL3S  | 0.2603  | 3.68E-07 | 4.67E-06 |
| RFPL3   | 0.0582  | 2.63E-01 | 3.90E-01 |
| RFPL4A  | -0.0280 | 5.91E-01 | 7.06E-01 |
| RFPL4B  | 0.0861  | 9.79E-02 | 1.83E-01 |
| RFT1    | 0.0940  | 7.05E-02 | 1.41E-01 |
| RFTN1   | -0.0236 | 6.50E-01 | 7.54E-01 |
| RFTN2   | -0.0263 | 6.14E-01 | 7.24E-01 |
| RFWD2   | 0.3861  | 1.24E-14 | 7.89E-13 |
| RFWD3   | 0.2719  | 1.03E-07 | 1.49E-06 |
| RFX1    | 0.0908  | 8.06E-02 | 1.57E-01 |
| RFX2    | 0.0711  | 1.72E-01 | 2.81E-01 |
| RFX3    | 0.1441  | 5.44E-03 | 1.77E-02 |
| RFX4    | 0.1217  | 1.91E-02 | 4.94E-02 |
| RFX5    | 0.2523  | 8.49E-07 | 9.80E-06 |
| RFX6    | 0.0758  | 1.45E-01 | 2.48E-01 |
| RFX7    | 0.0462  | 3.75E-01 | 5.08E-01 |
| RFX8    | 0.0674  | 1.95E-01 | 3.11E-01 |
| RFXANK  | 0.2244  | 1.28E-05 | 1.04E-04 |

|         |         |          |          |
|---------|---------|----------|----------|
| RFXAP   | 0.2949  | 6.98E-09 | 1.34E-07 |
| RG9MTD1 | 0.0545  | 2.95E-01 | 4.25E-01 |
| RG9MTD2 | -0.0157 | 7.63E-01 | 8.41E-01 |
| RG9MTD3 | 0.3709  | 1.54E-13 | 7.97E-12 |
| RGAG1   | -0.0811 | 1.19E-01 | 2.13E-01 |
| RGAG4   | -0.2711 | 1.13E-07 | 1.62E-06 |
| RGL1    | -0.0645 | 2.15E-01 | 3.35E-01 |
| RGL2    | 0.1537  | 2.99E-03 | 1.08E-02 |
| RGL3    | 0.1222  | 1.86E-02 | 4.84E-02 |
| RGL4    | 0.0613  | 2.39E-01 | 3.63E-01 |
| RGMA    | -0.0907 | 8.11E-02 | 1.57E-01 |
| RGMB    | -0.1003 | 5.36E-02 | 1.13E-01 |
| RGNEF   | -0.0485 | 3.51E-01 | 4.83E-01 |
| RGN     | -0.1949 | 1.58E-04 | 9.03E-04 |
| RGP1    | -0.0277 | 5.95E-01 | 7.09E-01 |
| RGPD1   | 0.0055  | 9.15E-01 | 9.47E-01 |
| RGPD3   | 0.0789  | 1.29E-01 | 2.26E-01 |
| RGPD4   | 0.1454  | 5.03E-03 | 1.66E-02 |
| RGPD5   | 0.1345  | 9.51E-03 | 2.81E-02 |
| RGPD6   | 0.1935  | 1.77E-04 | 9.95E-04 |
| RGPD8   | 0.0426  | 4.13E-01 | 5.46E-01 |
| RGR     | 0.0941  | 7.01E-02 | 1.41E-01 |
| RGS10   | 0.0572  | 2.72E-01 | 3.99E-01 |
| RGS11   | -0.1089 | 3.60E-02 | 8.27E-02 |
| RGS12   | 0.0556  | 2.85E-01 | 4.14E-01 |
| RGS13   | 0.0288  | 5.80E-01 | 6.96E-01 |
| RGS14   | 0.0107  | 8.38E-01 | 8.93E-01 |
| RGS16   | 0.0215  | 6.80E-01 | 7.78E-01 |
| RGS17   | 0.1591  | 2.12E-03 | 8.08E-03 |
| RGS18   | -0.1140 | 2.82E-02 | 6.80E-02 |
| RGS19   | 0.0917  | 7.79E-02 | 1.52E-01 |
| RGS1    | 0.0432  | 4.07E-01 | 5.39E-01 |
| RGS20   | 0.1827  | 4.04E-04 | 2.00E-03 |
| RGS21   | -0.0010 | 9.85E-01 | 9.90E-01 |
| RGS22   | -0.1017 | 5.02E-02 | 1.08E-01 |
| RGS2    | 0.0444  | 3.93E-01 | 5.26E-01 |
| RGS3    | -0.0026 | 9.60E-01 | 9.75E-01 |
| RGS4    | -0.0504 | 3.33E-01 | 4.64E-01 |
| RGS5    | -0.0896 | 8.47E-02 | 1.63E-01 |
| RGS6    | -0.1797 | 5.05E-04 | 2.40E-03 |
| RGS7BP  | -0.1143 | 2.77E-02 | 6.71E-02 |
| RGS7    | 0.0622  | 2.32E-01 | 3.55E-01 |
| RGS8    | 0.0157  | 7.63E-01 | 8.41E-01 |
| RGS9BP  | 0.0782  | 1.33E-01 | 2.31E-01 |

|         |         |          |          |
|---------|---------|----------|----------|
| RGS9    | -0.0657 | 2.07E-01 | 3.25E-01 |
| RGSL1   | -0.0918 | 7.75E-02 | 1.52E-01 |
| RHAG    | -0.0810 | 1.19E-01 | 2.14E-01 |
| RHBDD1  | -0.1985 | 1.19E-04 | 7.08E-04 |
| RHBDD2  | -0.1792 | 5.24E-04 | 2.47E-03 |
| RHBDD3  | 0.0530  | 3.09E-01 | 4.38E-01 |
| RHBDF1  | 0.0178  | 7.32E-01 | 8.19E-01 |
| RHBDF2  | 0.0988  | 5.73E-02 | 1.20E-01 |
| RHBDL1  | 0.0832  | 1.10E-01 | 2.00E-01 |
| RHBDL2  | 0.1497  | 3.84E-03 | 1.33E-02 |
| RHBDL3  | 0.0757  | 1.45E-01 | 2.48E-01 |
| RHBG    | 0.0703  | 1.76E-01 | 2.87E-01 |
| RHCE    | -0.0708 | 1.73E-01 | 2.83E-01 |
| RHCG    | -0.2011 | 9.61E-05 | 5.90E-04 |
| RHD     | -0.0642 | 2.17E-01 | 3.37E-01 |
| RHEBL1  | 0.3643  | 4.40E-13 | 2.10E-11 |
| RHEB    | 0.0750  | 1.49E-01 | 2.53E-01 |
| RHOA    | 0.0589  | 2.58E-01 | 3.84E-01 |
| RHOBTB1 | -0.0137 | 7.93E-01 | 8.63E-01 |
| RHOBTB2 | 0.0556  | 2.86E-01 | 4.14E-01 |
| RHOBTB3 | -0.0326 | 5.32E-01 | 6.54E-01 |
| RHOB    | -0.2783 | 5.00E-08 | 7.81E-07 |
| RHOC    | -0.1155 | 2.61E-02 | 6.37E-02 |
| RHOD    | -0.1161 | 2.53E-02 | 6.21E-02 |
| RHOF    | 0.1693  | 1.06E-03 | 4.51E-03 |
| RHOG    | 0.0674  | 1.95E-01 | 3.11E-01 |
| RHOH    | -0.0283 | 5.87E-01 | 7.02E-01 |
| RHOJ    | -0.1810 | 4.61E-04 | 2.22E-03 |
| RHOQ    | -0.0512 | 3.26E-01 | 4.56E-01 |
| RHOT1   | 0.2023  | 8.69E-05 | 5.41E-04 |
| RHOT2   | 0.1680  | 1.16E-03 | 4.87E-03 |
| RHOU    | 0.0055  | 9.16E-01 | 9.47E-01 |
| RHOV    | 0.1431  | 5.76E-03 | 1.85E-02 |
| RHOXF1  | 0.0798  | 1.25E-01 | 2.21E-01 |
| RHOXF2B | 0.1036  | 4.62E-02 | 1.01E-01 |
| RHO     | 0.1346  | 9.42E-03 | 2.79E-02 |
| RHPN1   | 0.1888  | 2.55E-04 | 1.36E-03 |
| RHPN2   | -0.0055 | 9.16E-01 | 9.47E-01 |
| RIBC1   | 0.1746  | 7.29E-04 | 3.28E-03 |
| RIBC2   | 0.4084  | 2.42E-16 | 2.22E-14 |
| RIC3    | 0.0232  | 6.56E-01 | 7.58E-01 |
| RIC8A   | 0.0813  | 1.18E-01 | 2.11E-01 |
| RIC8B   | 0.1350  | 9.21E-03 | 2.74E-02 |
| RICH2   | 0.0985  | 5.79E-02 | 1.21E-01 |

|         |         |          |          |
|---------|---------|----------|----------|
| RICTOR  | 0.1351  | 9.20E-03 | 2.74E-02 |
| RIF1    | 0.0927  | 7.45E-02 | 1.47E-01 |
| RILPL1  | 0.0610  | 2.41E-01 | 3.66E-01 |
| RILPL2  | -0.1585 | 2.20E-03 | 8.34E-03 |
| RILP    | -0.3522 | 2.83E-12 | 1.15E-10 |
| RIMBP2  | -0.0506 | 3.31E-01 | 4.62E-01 |
| RIMBP3C | 0.2167  | 2.56E-05 | 1.92E-04 |
| RIMBP3  | 0.1499  | 3.80E-03 | 1.32E-02 |
| RIMKLA  | 0.0340  | 5.14E-01 | 6.39E-01 |
| RIMKLB  | -0.0711 | 1.72E-01 | 2.81E-01 |
| RIMS1   | 0.0005  | 9.92E-01 | 9.95E-01 |
| RIMS2   | 0.0362  | 4.87E-01 | 6.15E-01 |
| RIMS3   | 0.3133  | 6.80E-10 | 1.67E-08 |
| RIMS4   | 0.0314  | 5.47E-01 | 6.67E-01 |
| RIN1    | 0.0016  | 9.76E-01 | 9.85E-01 |
| RIN2    | -0.0637 | 2.21E-01 | 3.42E-01 |
| RIN3    | -0.0568 | 2.75E-01 | 4.03E-01 |
| RING1   | 0.0729  | 1.61E-01 | 2.68E-01 |
| RINL    | 0.0828  | 1.11E-01 | 2.02E-01 |
| RINT1   | -0.0315 | 5.45E-01 | 6.66E-01 |
| RIOK1   | 0.2363  | 4.20E-06 | 3.99E-05 |
| RIOK2   | 0.0489  | 3.47E-01 | 4.79E-01 |
| RIOK3   | -0.1020 | 4.96E-02 | 1.07E-01 |
| RIPK1   | -0.0446 | 3.91E-01 | 5.24E-01 |
| RIPK2   | 0.0239  | 6.46E-01 | 7.50E-01 |
| RIPK3   | -0.0398 | 4.45E-01 | 5.77E-01 |
| RIPK4   | -0.0827 | 1.12E-01 | 2.03E-01 |
| RIPPLY1 | -0.1057 | 4.18E-02 | 9.33E-02 |
| RIPPLY2 | 0.1983  | 1.20E-04 | 7.15E-04 |
| RIT1    | 0.4157  | 6.25E-17 | 6.62E-15 |
| RIT2    | 0.0297  | 5.68E-01 | 6.85E-01 |
| RLBP1   | 0.0961  | 6.44E-02 | 1.31E-01 |
| RLF     | 0.0845  | 1.04E-01 | 1.91E-01 |
| RLIM    | 0.0981  | 5.90E-02 | 1.22E-01 |
| RLN1    | -0.0258 | 6.21E-01 | 7.30E-01 |
| RLN2    | 0.1503  | 3.70E-03 | 1.29E-02 |
| RLN3    | 0.2273  | 9.79E-06 | 8.26E-05 |
| RLTPR   | 0.0170  | 7.45E-01 | 8.28E-01 |
| RM11    | 0.3306  | 6.50E-11 | 1.99E-09 |
| RMND1   | 0.0284  | 5.86E-01 | 7.01E-01 |
| RMND5A  | -0.0971 | 6.17E-02 | 1.27E-01 |
| RMND5B  | -0.0003 | 9.96E-01 | 9.97E-01 |
| RMRP    | 0.0160  | 7.58E-01 | 8.38E-01 |
| RMST    | 0.1696  | 1.04E-03 | 4.43E-03 |

|          |         |          |          |
|----------|---------|----------|----------|
| RNASE10  | 0.0459  | 3.78E-01 | 5.11E-01 |
| RNASE11  | 0.0563  | 2.79E-01 | 4.08E-01 |
| RNASE12  | -0.0085 | 8.71E-01 | 9.17E-01 |
| RNASE13  | 0.0352  | 4.99E-01 | 6.25E-01 |
| RNASE1   | -0.0847 | 1.03E-01 | 1.90E-01 |
| RNASE2   | 0.1664  | 1.30E-03 | 5.37E-03 |
| RNASE3   | -0.0022 | 9.67E-01 | 9.79E-01 |
| RNASE4   | -0.2307 | 7.17E-06 | 6.29E-05 |
| RNASE6   | -0.0555 | 2.86E-01 | 4.15E-01 |
| RNASE7   | -0.0177 | 7.35E-01 | 8.20E-01 |
| RNASE8   | 0.0438  | 4.00E-01 | 5.33E-01 |
| RNASE9   | -0.0288 | 5.81E-01 | 6.97E-01 |
| RNASEH1  | 0.0468  | 3.69E-01 | 5.02E-01 |
| RNASEH2A | 0.3569  | 1.39E-12 | 6.01E-11 |
| RNASEH2B | 0.2195  | 1.99E-05 | 1.54E-04 |
| RNASEH2C | 0.0519  | 3.19E-01 | 4.49E-01 |
| RNASEK   | -0.0875 | 9.25E-02 | 1.75E-01 |
| RNASEL   | -0.0088 | 8.66E-01 | 9.14E-01 |
| RNASEN   | 0.3812  | 2.80E-14 | 1.66E-12 |
| RNASET2  | 0.1585  | 2.20E-03 | 8.34E-03 |
| RND1     | -0.0880 | 9.04E-02 | 1.72E-01 |
| RND2     | 0.0149  | 7.74E-01 | 8.49E-01 |
| RND3     | -0.1778 | 5.82E-04 | 2.70E-03 |
| RNF103   | -0.1067 | 3.99E-02 | 9.00E-02 |
| RNF10    | -0.1216 | 1.91E-02 | 4.95E-02 |
| RNF111   | 0.0073  | 8.88E-01 | 9.29E-01 |
| RNF112   | -0.0085 | 8.70E-01 | 9.16E-01 |
| RNF113A  | 0.2191  | 2.07E-05 | 1.59E-04 |
| RNF113B  | 0.0052  | 9.21E-01 | 9.50E-01 |
| RNF114   | 0.1199  | 2.09E-02 | 5.33E-02 |
| RNF115   | 0.2527  | 8.17E-07 | 9.47E-06 |
| RNF11    | -0.1905 | 2.23E-04 | 1.21E-03 |
| RNF121   | 0.0203  | 6.96E-01 | 7.90E-01 |
| RNF122   | 0.0719  | 1.67E-01 | 2.75E-01 |
| RNF123   | -0.2714 | 1.09E-07 | 1.57E-06 |
| RNF125   | -0.3074 | 1.46E-09 | 3.35E-08 |
| RNF126P1 | 0.1093  | 3.53E-02 | 8.16E-02 |
| RNF126   | -0.0210 | 6.86E-01 | 7.83E-01 |
| RNF128   | -0.1590 | 2.13E-03 | 8.13E-03 |
| RNF130   | -0.1658 | 1.35E-03 | 5.52E-03 |
| RNF133   | 0.0734  | 1.58E-01 | 2.64E-01 |
| RNF135   | -0.0694 | 1.83E-01 | 2.95E-01 |
| RNF138P1 | 0.0246  | 6.37E-01 | 7.43E-01 |
| RNF138   | 0.1450  | 5.14E-03 | 1.69E-02 |

|         |         |          |          |
|---------|---------|----------|----------|
| RNF139  | -0.0613 | 2.39E-01 | 3.63E-01 |
| RNF13   | -0.1173 | 2.38E-02 | 5.92E-02 |
| RNF141  | -0.1034 | 4.65E-02 | 1.02E-01 |
| RNF144A | 0.3122  | 7.87E-10 | 1.91E-08 |
| RNF144B | -0.2351 | 4.70E-06 | 4.41E-05 |
| RNF145  | 0.0554  | 2.87E-01 | 4.16E-01 |
| RNF146  | 0.1422  | 6.09E-03 | 1.94E-02 |
| RNF148  | 0.0988  | 5.74E-02 | 1.20E-01 |
| RNF149  | 0.0631  | 2.25E-01 | 3.47E-01 |
| RNF14   | -0.2347 | 4.88E-06 | 4.55E-05 |
| RNF150  | -0.1418 | 6.22E-03 | 1.97E-02 |
| RNF151  | 0.2693  | 1.39E-07 | 1.96E-06 |
| RNF152  | -0.2968 | 5.55E-09 | 1.10E-07 |
| RNF157  | 0.0865  | 9.61E-02 | 1.80E-01 |
| RNF160  | 0.0111  | 8.31E-01 | 8.89E-01 |
| RNF165  | -0.1076 | 3.83E-02 | 8.71E-02 |
| RNF166  | 0.0384  | 4.61E-01 | 5.92E-01 |
| RNF167  | -0.1334 | 1.01E-02 | 2.95E-02 |
| RNF168  | -0.0110 | 8.33E-01 | 8.90E-01 |
| RNF169  | 0.0729  | 1.61E-01 | 2.68E-01 |
| RNF170  | -0.0845 | 1.04E-01 | 1.92E-01 |
| RNF175  | -0.0343 | 5.11E-01 | 6.35E-01 |
| RNF17   | 0.1599  | 2.01E-03 | 7.72E-03 |
| RNF180  | -0.1151 | 2.66E-02 | 6.48E-02 |
| RNF181  | 0.0309  | 5.53E-01 | 6.73E-01 |
| RNF182  | -0.1192 | 2.17E-02 | 5.49E-02 |
| RNF183  | 0.0899  | 8.39E-02 | 1.62E-01 |
| RNF185  | -0.1170 | 2.42E-02 | 5.99E-02 |
| RNF186  | 0.1269  | 1.44E-02 | 3.95E-02 |
| RNF187  | 0.0418  | 4.22E-01 | 5.55E-01 |
| RNF19A  | 0.0211  | 6.86E-01 | 7.82E-01 |
| RNF19B  | 0.0743  | 1.53E-01 | 2.58E-01 |
| RNF207  | 0.1332  | 1.02E-02 | 2.97E-02 |
| RNF208  | -0.0161 | 7.58E-01 | 8.37E-01 |
| RNF20   | 0.2730  | 9.19E-08 | 1.34E-06 |
| RNF212  | -0.0384 | 4.61E-01 | 5.92E-01 |
| RNF213  | 0.1674  | 1.21E-03 | 5.07E-03 |
| RNF214  | 0.2124  | 3.70E-05 | 2.62E-04 |
| RNF215  | 0.0105  | 8.41E-01 | 8.96E-01 |
| RNF216L | 0.0423  | 4.17E-01 | 5.49E-01 |
| RNF216  | 0.1916  | 2.06E-04 | 1.13E-03 |
| RNF217  | -0.0838 | 1.07E-01 | 1.96E-01 |
| RNF219  | 0.1950  | 1.57E-04 | 8.95E-04 |
| RNF220  | 0.3034  | 2.43E-09 | 5.24E-08 |



|          |         |          |          |
|----------|---------|----------|----------|
| RNF222   | 0.1062  | 4.09E-02 | 9.17E-02 |
| RNF24    | 0.2571  | 5.17E-07 | 6.29E-06 |
| RNF25    | 0.1126  | 3.01E-02 | 7.17E-02 |
| RNF26    | 0.1483  | 4.20E-03 | 1.43E-02 |
| RNF2     | 0.1976  | 1.28E-04 | 7.51E-04 |
| RNF31    | 0.1754  | 6.89E-04 | 3.13E-03 |
| RNF32    | 0.0610  | 2.41E-01 | 3.66E-01 |
| RNF34    | 0.2601  | 3.75E-07 | 4.76E-06 |
| RNF38    | 0.1367  | 8.39E-03 | 2.53E-02 |
| RNF39    | 0.1372  | 8.15E-03 | 2.47E-02 |
| RNF40    | 0.0521  | 3.17E-01 | 4.47E-01 |
| RNF41    | 0.0240  | 6.45E-01 | 7.50E-01 |
| RNF43    | 0.0414  | 4.27E-01 | 5.59E-01 |
| RNF44    | 0.2075  | 5.63E-05 | 3.76E-04 |
| RNF4     | 0.0891  | 8.66E-02 | 1.66E-01 |
| RNF5P1   | -0.0451 | 3.86E-01 | 5.19E-01 |
| RNF5     | 0.0047  | 9.29E-01 | 9.55E-01 |
| RNF6     | -0.0527 | 3.12E-01 | 4.41E-01 |
| RNF7     | -0.0491 | 3.46E-01 | 4.78E-01 |
| RNF8     | 0.3162  | 4.65E-10 | 1.19E-08 |
| RNFT1    | 0.0798  | 1.25E-01 | 2.21E-01 |
| RNFT2    | 0.2609  | 3.47E-07 | 4.44E-06 |
| RNGTT    | 0.1728  | 8.34E-04 | 3.67E-03 |
| RNH1     | -0.1240 | 1.68E-02 | 4.46E-02 |
| RNLS     | -0.2699 | 1.29E-07 | 1.83E-06 |
| RNMTL1   | -0.1259 | 1.53E-02 | 4.13E-02 |
| RNMT     | 0.1114  | 3.19E-02 | 7.50E-02 |
| RNPC3    | 0.1686  | 1.12E-03 | 4.73E-03 |
| RNPEPL1  | -0.1012 | 5.15E-02 | 1.10E-01 |
| RNPEP    | -0.0167 | 7.48E-01 | 8.30E-01 |
| RNPS1    | 0.3179  | 3.70E-10 | 9.77E-09 |
| RNU11    | 0.0905  | 8.17E-02 | 1.58E-01 |
| RNU4ATAC | -0.0271 | 6.03E-01 | 7.15E-01 |
| RNU6ATAC | 0.1026  | 4.83E-02 | 1.05E-01 |
| ROBLD3   | 0.1075  | 3.85E-02 | 8.74E-02 |
| ROBO1    | 0.1096  | 3.49E-02 | 8.08E-02 |
| ROBO2    | 0.0126  | 8.09E-01 | 8.74E-01 |
| ROBO3    | 0.0562  | 2.80E-01 | 4.09E-01 |
| ROBO4    | -0.2708 | 1.17E-07 | 1.67E-06 |
| ROCK1    | -0.0529 | 3.10E-01 | 4.39E-01 |
| ROCK2    | -0.0480 | 3.56E-01 | 4.88E-01 |
| ROD1     | 0.3227  | 1.93E-10 | 5.39E-09 |
| ROGDI    | -0.0547 | 2.93E-01 | 4.22E-01 |
| ROM1     | -0.1381 | 7.73E-03 | 2.36E-02 |

|             |         |          |          |
|-------------|---------|----------|----------|
| ROMO1       | 0.0863  | 9.68E-02 | 1.81E-01 |
| ROPN1B      | -0.0238 | 6.48E-01 | 7.52E-01 |
| ROPN1L      | 0.0591  | 2.57E-01 | 3.82E-01 |
| ROPN1       | 0.0391  | 4.53E-01 | 5.84E-01 |
| ROR1        | 0.0282  | 5.89E-01 | 7.03E-01 |
| ROR2        | -0.0338 | 5.17E-01 | 6.41E-01 |
| RORA        | -0.2188 | 2.13E-05 | 1.63E-04 |
| RORB        | -0.0606 | 2.45E-01 | 3.69E-01 |
| RORC        | 0.0175  | 7.36E-01 | 8.22E-01 |
| ROS1        | -0.0570 | 2.74E-01 | 4.02E-01 |
| RP1-177G6.2 | 0.0480  | 3.57E-01 | 4.89E-01 |
| RP1L1       | -0.0816 | 1.16E-01 | 2.09E-01 |
| RP1         | -0.0489 | 3.47E-01 | 4.80E-01 |
| RP2         | -0.0624 | 2.30E-01 | 3.53E-01 |
| RP9P        | 0.2148  | 3.01E-05 | 2.19E-04 |
| RP9         | 0.0927  | 7.47E-02 | 1.48E-01 |
| RPA1        | 0.2119  | 3.88E-05 | 2.73E-04 |
| RPA2        | 0.1498  | 3.82E-03 | 1.32E-02 |
| RPA3        | 0.1326  | 1.06E-02 | 3.05E-02 |
| RPA4        | 0.1701  | 1.00E-03 | 4.30E-03 |
| RPAIN       | 0.0273  | 6.00E-01 | 7.13E-01 |
| RPAP1       | 0.1368  | 8.33E-03 | 2.52E-02 |
| RPAP2       | 0.1074  | 3.87E-02 | 8.78E-02 |
| RPAP3       | 0.2137  | 3.32E-05 | 2.38E-04 |
| RPE65       | 0.0615  | 2.38E-01 | 3.61E-01 |
| RPE         | 0.0257  | 6.21E-01 | 7.30E-01 |
| RPF1        | 0.1244  | 1.65E-02 | 4.39E-02 |
| RPF2        | 0.1845  | 3.52E-04 | 1.78E-03 |
| RPGRIP1L    | 0.1056  | 4.20E-02 | 9.37E-02 |
| RPGRIP1     | 0.1049  | 4.35E-02 | 9.63E-02 |
| RPGR        | 0.0288  | 5.81E-01 | 6.97E-01 |
| RPH3AL      | -0.2649 | 2.24E-07 | 3.00E-06 |
| RPH3A       | -0.0408 | 4.33E-01 | 5.65E-01 |
| RPIA        | 0.3229  | 1.90E-10 | 5.31E-09 |
| RPL10A      | 0.0917  | 7.79E-02 | 1.52E-01 |
| RPL10L      | 0.0525  | 3.14E-01 | 4.43E-01 |
| RPL10       | 0.1468  | 4.59E-03 | 1.54E-02 |
| RPL11       | 0.0358  | 4.92E-01 | 6.19E-01 |
| RPL12       | 0.0639  | 2.19E-01 | 3.40E-01 |
| RPL13AP17   | -0.0606 | 2.44E-01 | 3.69E-01 |
| RPL13AP20   | 0.0524  | 3.15E-01 | 4.44E-01 |
| RPL13AP3    | 0.0356  | 4.95E-01 | 6.21E-01 |
| RPL13AP6    | 0.1283  | 1.34E-02 | 3.72E-02 |
| RPL13A      | 0.0398  | 4.45E-01 | 5.77E-01 |

|           |         |          |          |
|-----------|---------|----------|----------|
| RPL13P5   | 0.1731  | 8.11E-04 | 3.59E-03 |
| RPL13     | -0.0606 | 2.44E-01 | 3.68E-01 |
| RPL14     | 0.0844  | 1.04E-01 | 1.92E-01 |
| RPL15     | 0.0025  | 9.62E-01 | 9.76E-01 |
| RPL17     | 0.1463  | 4.76E-03 | 1.58E-02 |
| RPL18A    | 0.0636  | 2.22E-01 | 3.43E-01 |
| RPL18     | 0.0910  | 7.99E-02 | 1.56E-01 |
| RPL19P12  | 0.1256  | 1.55E-02 | 4.18E-02 |
| RPL19     | 0.1190  | 2.19E-02 | 5.52E-02 |
| RPL21P44  | 0.0022  | 9.66E-01 | 9.79E-01 |
| RPL21     | 0.0990  | 5.68E-02 | 1.19E-01 |
| RPL22L1   | 0.0432  | 4.07E-01 | 5.40E-01 |
| RPL22     | 0.0496  | 3.41E-01 | 4.72E-01 |
| RPL23AP32 | 0.1075  | 3.85E-02 | 8.75E-02 |
| RPL23AP53 | 0.1070  | 3.94E-02 | 8.91E-02 |
| RPL23AP64 | 0.0701  | 1.78E-01 | 2.89E-01 |
| RPL23AP7  | 0.0008  | 9.88E-01 | 9.93E-01 |
| RPL23AP82 | 0.0114  | 8.27E-01 | 8.87E-01 |
| RPL23A    | 0.1915  | 2.07E-04 | 1.14E-03 |
| RPL23P8   | 0.1227  | 1.80E-02 | 4.72E-02 |
| RPL23     | 0.1814  | 4.46E-04 | 2.16E-03 |
| RPL24     | 0.0767  | 1.40E-01 | 2.41E-01 |
| RPL26L1   | -0.0895 | 8.50E-02 | 1.63E-01 |
| RPL26     | 0.0134  | 7.97E-01 | 8.65E-01 |
| RPL27A    | 0.0913  | 7.89E-02 | 1.54E-01 |
| RPL27     | 0.2128  | 3.59E-05 | 2.56E-04 |
| RPL28     | 0.0342  | 5.12E-01 | 6.36E-01 |
| RPL29P2   | 0.0119  | 8.19E-01 | 8.81E-01 |
| RPL29     | 0.0420  | 4.19E-01 | 5.52E-01 |
| RPL30     | 0.0956  | 6.59E-02 | 1.34E-01 |
| RPL31P11  | 0.1344  | 9.52E-03 | 2.81E-02 |
| RPL31     | 0.1021  | 4.93E-02 | 1.06E-01 |
| RPL32P3   | 0.2481  | 1.31E-06 | 1.44E-05 |
| RPL32     | 0.1022  | 4.92E-02 | 1.06E-01 |
| RPL34     | -0.0020 | 9.69E-01 | 9.81E-01 |
| RPL35A    | 0.2008  | 9.83E-05 | 6.01E-04 |
| RPL35     | 0.1224  | 1.84E-02 | 4.80E-02 |
| RPL36AL   | -0.1183 | 2.27E-02 | 5.70E-02 |
| RPL36A    | 0.2165  | 2.60E-05 | 1.94E-04 |
| RPL36     | 0.0408  | 4.33E-01 | 5.65E-01 |
| RPL37A    | 0.1135  | 2.89E-02 | 6.93E-02 |
| RPL37     | 0.1754  | 6.92E-04 | 3.14E-03 |
| RPL38     | 0.2173  | 2.42E-05 | 1.82E-04 |
| RPL39L    | 0.1794  | 5.16E-04 | 2.44E-03 |

|           |         |          |          |
|-----------|---------|----------|----------|
| RPL39     | 0.1575  | 2.34E-03 | 8.78E-03 |
| RPL3L     | 0.0210  | 6.87E-01 | 7.83E-01 |
| RPL3      | -0.0368 | 4.80E-01 | 6.09E-01 |
| RPL41     | 0.0809  | 1.20E-01 | 2.14E-01 |
| RPL4      | 0.0345  | 5.07E-01 | 6.32E-01 |
| RPL5      | 0.1307  | 1.17E-02 | 3.33E-02 |
| RPL6      | 0.0891  | 8.66E-02 | 1.66E-01 |
| RPL7A     | 0.1232  | 1.76E-02 | 4.63E-02 |
| RPL7L1    | -0.0060 | 9.08E-01 | 9.42E-01 |
| RPL7      | 0.0370  | 4.78E-01 | 6.06E-01 |
| RPL8      | 0.0868  | 9.50E-02 | 1.79E-01 |
| RPL9      | -0.0133 | 7.98E-01 | 8.67E-01 |
| RPLP0P2   | 0.0909  | 8.03E-02 | 1.56E-01 |
| RPLP0     | 0.0998  | 5.48E-02 | 1.16E-01 |
| RPLP1     | 0.1066  | 4.02E-02 | 9.04E-02 |
| RPLP2     | 0.1371  | 8.18E-03 | 2.48E-02 |
| RPN1      | -0.0350 | 5.02E-01 | 6.28E-01 |
| RPN2      | 0.1368  | 8.32E-03 | 2.51E-02 |
| RPP14     | -0.2160 | 2.71E-05 | 2.01E-04 |
| RPP21     | 0.3018  | 3.00E-09 | 6.34E-08 |
| RPP25     | 0.1344  | 9.54E-03 | 2.81E-02 |
| RPP30     | 0.2152  | 2.90E-05 | 2.13E-04 |
| RPP38     | 0.1850  | 3.41E-04 | 1.74E-03 |
| RPP40     | 0.0517  | 3.21E-01 | 4.51E-01 |
| RPPH1     | -0.0204 | 6.96E-01 | 7.90E-01 |
| RPRD1A    | 0.2112  | 4.13E-05 | 2.88E-04 |
| RPRD1B    | -0.1086 | 3.66E-02 | 8.40E-02 |
| RPRD2     | 0.4335  | 1.96E-18 | 3.15E-16 |
| RPRML     | -0.0552 | 2.89E-01 | 4.18E-01 |
| RPRM      | 0.0910  | 8.00E-02 | 1.56E-01 |
| RPS10P7   | 0.1119  | 3.12E-02 | 7.37E-02 |
| RPS10     | 0.1384  | 7.57E-03 | 2.32E-02 |
| RPS11     | 0.0799  | 1.24E-01 | 2.20E-01 |
| RPS12     | 0.1756  | 6.83E-04 | 3.10E-03 |
| RPS13     | 0.1106  | 3.33E-02 | 7.78E-02 |
| RPS14     | 0.0603  | 2.46E-01 | 3.71E-01 |
| RPS15AP10 | 0.1118  | 3.13E-02 | 7.40E-02 |
| RPS15A    | 0.1176  | 2.35E-02 | 5.85E-02 |
| RPS15     | 0.0514  | 3.24E-01 | 4.54E-01 |
| RPS16     | 0.1270  | 1.43E-02 | 3.93E-02 |
| RPS17     | 0.0967  | 6.28E-02 | 1.29E-01 |
| RPS18     | 0.1647  | 1.45E-03 | 5.89E-03 |
| RPS19BP1  | 0.0756  | 1.46E-01 | 2.49E-01 |
| RPS19     | 0.0935  | 7.20E-02 | 1.43E-01 |

|          |         |          |          |
|----------|---------|----------|----------|
| RPS20    | 0.0214  | 6.82E-01 | 7.79E-01 |
| RPS21    | 0.1970  | 1.34E-04 | 7.82E-04 |
| RPS23    | 0.0819  | 1.15E-01 | 2.08E-01 |
| RPS24    | 0.0987  | 5.76E-02 | 1.20E-01 |
| RPS25    | 0.1093  | 3.53E-02 | 8.16E-02 |
| RPS26P11 | -0.0231 | 6.57E-01 | 7.59E-01 |
| RPS26    | 0.0414  | 4.26E-01 | 5.59E-01 |
| RPS27A   | 0.1290  | 1.29E-02 | 3.60E-02 |
| RPS27L   | -0.1778 | 5.81E-04 | 2.70E-03 |
| RPS27    | 0.1204  | 2.04E-02 | 5.21E-02 |
| RPS28    | -0.0402 | 4.40E-01 | 5.72E-01 |
| RPS29    | 0.0716  | 1.69E-01 | 2.77E-01 |
| RPS2P32  | 0.1479  | 4.29E-03 | 1.46E-02 |
| RPS2     | 0.0614  | 2.38E-01 | 3.62E-01 |
| RPS3A    | 0.0763  | 1.43E-01 | 2.44E-01 |
| RPS3     | 0.1612  | 1.84E-03 | 7.19E-03 |
| RPS4X    | 0.1277  | 1.38E-02 | 3.82E-02 |
| RPS4Y1   | -0.0362 | 4.86E-01 | 6.14E-01 |
| RPS4Y2   | 0.0136  | 7.93E-01 | 8.63E-01 |
| RPS5     | 0.1165  | 2.48E-02 | 6.11E-02 |
| RPS6KA1  | -0.0404 | 4.38E-01 | 5.69E-01 |
| RPS6KA2  | -0.1884 | 2.63E-04 | 1.39E-03 |
| RPS6KA3  | 0.0136  | 7.94E-01 | 8.63E-01 |
| RPS6KA4  | 0.0514  | 3.23E-01 | 4.54E-01 |
| RPS6KA5  | 0.1213  | 1.95E-02 | 5.03E-02 |
| RPS6KA6  | 0.0664  | 2.02E-01 | 3.18E-01 |
| RPS6KB1  | 0.2148  | 3.01E-05 | 2.19E-04 |
| RPS6KB2  | -0.0419 | 4.21E-01 | 5.54E-01 |
| RPS6KC1  | 0.3267  | 1.12E-10 | 3.26E-09 |
| RPS6KL1  | -0.1139 | 2.83E-02 | 6.82E-02 |
| RPS6     | 0.1420  | 6.15E-03 | 1.95E-02 |
| RPS7     | 0.1309  | 1.16E-02 | 3.30E-02 |
| RPS8     | 0.1361  | 8.65E-03 | 2.60E-02 |
| RPS9     | 0.0597  | 2.51E-01 | 3.76E-01 |
| RPSAP52  | 0.0981  | 5.92E-02 | 1.23E-01 |
| RPSAP58  | 0.1373  | 8.08E-03 | 2.45E-02 |
| RPSAP9   | 0.1059  | 4.15E-02 | 9.28E-02 |
| RPSA     | 0.1384  | 7.60E-03 | 2.33E-02 |
| RPTN     | 0.0940  | 7.06E-02 | 1.41E-01 |
| RPTOR    | 0.1288  | 1.30E-02 | 3.63E-02 |
| RPUSD1   | 0.1101  | 3.40E-02 | 7.92E-02 |
| RPUSD2   | -0.0451 | 3.87E-01 | 5.20E-01 |
| RPUSD3   | -0.0238 | 6.47E-01 | 7.51E-01 |
| RPUSD4   | -0.0687 | 1.86E-01 | 3.00E-01 |

|          |         |          |          |
|----------|---------|----------|----------|
| RQCD1    | 0.1666  | 1.28E-03 | 5.30E-03 |
| RRAD     | 0.0112  | 8.30E-01 | 8.89E-01 |
| RRAGA    | -0.0758 | 1.45E-01 | 2.47E-01 |
| RRAGB    | -0.0195 | 7.08E-01 | 8.00E-01 |
| RRAGC    | 0.0173  | 7.40E-01 | 8.25E-01 |
| RRAGD    | 0.0701  | 1.78E-01 | 2.89E-01 |
| RRAS2    | 0.0043  | 9.34E-01 | 9.59E-01 |
| RRAS     | -0.0227 | 6.64E-01 | 7.64E-01 |
| RRBP1    | -0.0592 | 2.55E-01 | 3.81E-01 |
| RREB1    | -0.0141 | 7.86E-01 | 8.58E-01 |
| RRH      | -0.0455 | 3.82E-01 | 5.15E-01 |
| RRM1     | 0.3754  | 7.34E-14 | 3.97E-12 |
| RRM2B    | -0.1701 | 1.01E-03 | 4.32E-03 |
| RRM2     | 0.3489  | 4.63E-12 | 1.80E-10 |
| RRN3P1   | 0.0638  | 2.20E-01 | 3.40E-01 |
| RRN3P2   | -0.0135 | 7.96E-01 | 8.64E-01 |
| RRN3P3   | 0.0973  | 6.11E-02 | 1.26E-01 |
| RRN3     | -0.1089 | 3.61E-02 | 8.29E-02 |
| RRP12    | 0.0888  | 8.76E-02 | 1.67E-01 |
| RRP15    | 0.2604  | 3.64E-07 | 4.63E-06 |
| RRP1B    | 0.1499  | 3.80E-03 | 1.32E-02 |
| RRP1     | 0.2014  | 9.34E-05 | 5.75E-04 |
| RRP7A    | -0.0138 | 7.91E-01 | 8.62E-01 |
| RRP7B    | 0.1999  | 1.06E-04 | 6.38E-04 |
| RRP8     | -0.0193 | 7.10E-01 | 8.02E-01 |
| RRP9     | 0.1657  | 1.36E-03 | 5.56E-03 |
| RRS1     | 0.0039  | 9.41E-01 | 9.64E-01 |
| RS1      | 0.2264  | 1.06E-05 | 8.87E-05 |
| RSAD1    | -0.1038 | 4.56E-02 | 1.00E-01 |
| RSAD2    | -0.0339 | 5.15E-01 | 6.39E-01 |
| RSBN1L   | -0.0515 | 3.23E-01 | 4.53E-01 |
| RSBN1    | -0.0128 | 8.06E-01 | 8.72E-01 |
| RSC1A1   | -0.1762 | 6.51E-04 | 2.98E-03 |
| RSF1     | -0.0112 | 8.30E-01 | 8.89E-01 |
| RSL1D1   | 0.1383  | 7.62E-03 | 2.33E-02 |
| RSL24D1  | 0.0619  | 2.34E-01 | 3.57E-01 |
| RSPH10B2 | 0.0286  | 5.83E-01 | 6.99E-01 |
| RSPH1    | 0.2507  | 1.01E-06 | 1.14E-05 |
| RSPH3    | 0.1057  | 4.18E-02 | 9.34E-02 |
| RSPH4A   | 0.0049  | 9.25E-01 | 9.52E-01 |
| RSPH6A   | 0.0871  | 9.38E-02 | 1.77E-01 |
| RSPH9    | 0.0850  | 1.02E-01 | 1.89E-01 |
| RSPO1    | -0.0745 | 1.52E-01 | 2.57E-01 |
| RSPO2    | -0.1234 | 1.74E-02 | 4.58E-02 |

|         |         |          |          |
|---------|---------|----------|----------|
| RSPO3   | -0.1781 | 5.70E-04 | 2.65E-03 |
| RSPO4   | 0.0942  | 7.00E-02 | 1.40E-01 |
| RSPRY1  | -0.1462 | 4.79E-03 | 1.59E-02 |
| RSRC1   | 0.0466  | 3.71E-01 | 5.03E-01 |
| RSRC2   | 0.1216  | 1.91E-02 | 4.95E-02 |
| RSU1    | -0.0400 | 4.43E-01 | 5.75E-01 |
| RTBDN   | 0.0043  | 9.34E-01 | 9.59E-01 |
| RTCD1   | 0.1133  | 2.91E-02 | 6.98E-02 |
| RTDR1   | 0.2248  | 1.24E-05 | 1.01E-04 |
| RTEL1   | 0.2085  | 5.20E-05 | 3.50E-04 |
| RTF1    | 0.0049  | 9.26E-01 | 9.53E-01 |
| RTKN2   | 0.3697  | 1.84E-13 | 9.35E-12 |
| RTKN    | 0.1175  | 2.36E-02 | 5.88E-02 |
| RTL1    | -0.0267 | 6.09E-01 | 7.20E-01 |
| RTN1    | -0.0298 | 5.67E-01 | 6.85E-01 |
| RTN2    | 0.0728  | 1.62E-01 | 2.69E-01 |
| RTN3    | 0.1056  | 4.20E-02 | 9.36E-02 |
| RTN4IP1 | 0.0446  | 3.92E-01 | 5.25E-01 |
| RTN4RL1 | 0.0379  | 4.67E-01 | 5.96E-01 |
| RTN4RL2 | -0.0061 | 9.06E-01 | 9.41E-01 |
| RTN4R   | 0.0826  | 1.12E-01 | 2.04E-01 |
| RTN4    | -0.2714 | 1.09E-07 | 1.57E-06 |
| RTP1    | -0.0092 | 8.59E-01 | 9.09E-01 |
| RTP2    | -0.0813 | 1.18E-01 | 2.11E-01 |
| RTP3    | -0.2687 | 1.48E-07 | 2.07E-06 |
| RTP4    | -0.0085 | 8.71E-01 | 9.17E-01 |
| RTTN    | 0.1826  | 4.07E-04 | 2.01E-03 |
| RUFY1   | 0.0648  | 2.13E-01 | 3.32E-01 |
| RUFY2   | 0.1260  | 1.52E-02 | 4.10E-02 |
| RUFY3   | -0.0598 | 2.51E-01 | 3.76E-01 |
| RUFY4   | 0.1331  | 1.03E-02 | 2.99E-02 |
| RUNDC1  | 0.3146  | 5.75E-10 | 1.44E-08 |
| RUNDC2A | 0.0261  | 6.16E-01 | 7.26E-01 |
| RUNDC2C | 0.0592  | 2.56E-01 | 3.81E-01 |
| RUNDC3A | 0.2042  | 7.41E-05 | 4.74E-04 |
| RUNDC3B | -0.2792 | 4.55E-08 | 7.20E-07 |
| RUNX1T1 | -0.2226 | 1.50E-05 | 1.20E-04 |
| RUNX1   | 0.1439  | 5.50E-03 | 1.79E-02 |
| RUNX2   | -0.0311 | 5.50E-01 | 6.70E-01 |
| RUNX3   | -0.0617 | 2.36E-01 | 3.60E-01 |
| RUSC1   | 0.5076  | 1.10E-25 | 6.43E-23 |
| RUSC2   | 0.0946  | 6.86E-02 | 1.38E-01 |
| RUVBL1  | 0.1631  | 1.62E-03 | 6.47E-03 |
| RUVBL2  | 0.0855  | 1.00E-01 | 1.86E-01 |

|         |         |          |          |
|---------|---------|----------|----------|
| RWDD1   | 0.1169  | 2.44E-02 | 6.03E-02 |
| RWDD2A  | 0.2309  | 7.02E-06 | 6.19E-05 |
| RWDD2B  | -0.2329 | 5.78E-06 | 5.24E-05 |
| RWDD3   | 0.1004  | 5.34E-02 | 1.13E-01 |
| RWDD4A  | -0.2422 | 2.37E-06 | 2.42E-05 |
| RXFP1   | -0.0137 | 7.92E-01 | 8.62E-01 |
| RXFP2   | -0.0002 | 9.97E-01 | 9.98E-01 |
| RXFP3   | 0.0668  | 1.99E-01 | 3.16E-01 |
| RXFP4   | 0.2428  | 2.23E-06 | 2.29E-05 |
| RXRA    | 0.0004  | 9.94E-01 | 9.96E-01 |
| RXRB    | 0.0556  | 2.85E-01 | 4.14E-01 |
| RXRG    | -0.0368 | 4.80E-01 | 6.09E-01 |
| RYBP    | -0.0305 | 5.58E-01 | 6.77E-01 |
| RYK     | 0.1486  | 4.11E-03 | 1.41E-02 |
| RYR1    | -0.0048 | 9.27E-01 | 9.54E-01 |
| RYR2    | 0.0340  | 5.14E-01 | 6.38E-01 |
| RYR3    | 0.1227  | 1.80E-02 | 4.72E-02 |
| S100A10 | 0.1893  | 2.45E-04 | 1.31E-03 |
| S100A11 | 0.1139  | 2.83E-02 | 6.81E-02 |
| S100A12 | -0.1049 | 4.35E-02 | 9.63E-02 |
| S100A13 | 0.1970  | 1.34E-04 | 7.84E-04 |
| S100A14 | 0.1972  | 1.32E-04 | 7.76E-04 |
| S100A16 | 0.1758  | 6.70E-04 | 3.05E-03 |
| S100A1  | 0.1564  | 2.53E-03 | 9.35E-03 |
| S100A2  | 0.1807  | 4.69E-04 | 2.25E-03 |
| S100A3  | 0.0762  | 1.43E-01 | 2.45E-01 |
| S100A4  | 0.0264  | 6.12E-01 | 7.23E-01 |
| S100A5  | 0.0872  | 9.34E-02 | 1.76E-01 |
| S100A6  | 0.0921  | 7.63E-02 | 1.50E-01 |
| S100A7A | -0.0059 | 9.10E-01 | 9.43E-01 |
| S100A7  | 0.0203  | 6.97E-01 | 7.91E-01 |
| S100A8  | 0.0302  | 5.62E-01 | 6.80E-01 |
| S100A9  | 0.1169  | 2.43E-02 | 6.02E-02 |
| S100B   | 0.0796  | 1.26E-01 | 2.22E-01 |
| S100G   | 0.0269  | 6.05E-01 | 7.17E-01 |
| S100PBP | 0.3766  | 6.07E-14 | 3.33E-12 |
| S100P   | 0.2049  | 7.03E-05 | 4.52E-04 |
| S100Z   | -0.0160 | 7.59E-01 | 8.38E-01 |
| S1PR1   | -0.2144 | 3.13E-05 | 2.27E-04 |
| S1PR2   | 0.1468  | 4.60E-03 | 1.54E-02 |
| S1PR3   | -0.0361 | 4.88E-01 | 6.15E-01 |
| S1PR4   | -0.1028 | 4.79E-02 | 1.04E-01 |
| S1PR5   | 0.0071  | 8.92E-01 | 9.31E-01 |
| SAA1    | -0.1785 | 5.52E-04 | 2.59E-03 |



|         |         |          |          |
|---------|---------|----------|----------|
| SAA2    | -0.1924 | 1.93E-04 | 1.07E-03 |
| SAA3P   | 0.0309  | 5.54E-01 | 6.73E-01 |
| SAA4    | -0.1483 | 4.20E-03 | 1.43E-02 |
| SAAL1   | 0.1621  | 1.74E-03 | 6.84E-03 |
| SAC3D1  | 0.2952  | 6.73E-09 | 1.30E-07 |
| SACM1L  | -0.0914 | 7.87E-02 | 1.54E-01 |
| SACS    | 0.1555  | 2.67E-03 | 9.80E-03 |
| SAE1    | 0.1707  | 9.63E-04 | 4.17E-03 |
| SAFB2   | 0.1668  | 1.26E-03 | 5.24E-03 |
| SAFB    | 0.1564  | 2.53E-03 | 9.35E-03 |
| SAGE1   | 0.1417  | 6.26E-03 | 1.98E-02 |
| SAG     | 0.0440  | 3.98E-01 | 5.31E-01 |
| SALL1   | -0.1553 | 2.70E-03 | 9.90E-03 |
| SALL2   | 0.2804  | 3.95E-08 | 6.33E-07 |
| SALL3   | 0.0656  | 2.08E-01 | 3.26E-01 |
| SALL4   | 0.3043  | 2.18E-09 | 4.77E-08 |
| SAMD10  | 0.1161  | 2.53E-02 | 6.21E-02 |
| SAMD11  | -0.0694 | 1.82E-01 | 2.94E-01 |
| SAMD12  | 0.0750  | 1.50E-01 | 2.53E-01 |
| SAMD13  | 0.1302  | 1.21E-02 | 3.41E-02 |
| SAMD14  | 0.0422  | 4.18E-01 | 5.51E-01 |
| SAMD1   | 0.1591  | 2.11E-03 | 8.05E-03 |
| SAMD3   | -0.0833 | 1.09E-01 | 1.99E-01 |
| SAMD4A  | -0.1641 | 1.51E-03 | 6.09E-03 |
| SAMD4B  | 0.1197  | 2.11E-02 | 5.35E-02 |
| SAMD5   | -0.0507 | 3.30E-01 | 4.61E-01 |
| SAMD7   | -0.0102 | 8.45E-01 | 8.99E-01 |
| SAMD8   | -0.0852 | 1.01E-01 | 1.87E-01 |
| SAMD9L  | -0.0291 | 5.77E-01 | 6.94E-01 |
| SAMD9   | -0.0709 | 1.73E-01 | 2.82E-01 |
| SAMHD1  | -0.1465 | 4.68E-03 | 1.56E-02 |
| SAMM50  | -0.1056 | 4.20E-02 | 9.36E-02 |
| SAMSN1  | -0.0623 | 2.31E-01 | 3.54E-01 |
| SAP130  | 0.2724  | 9.76E-08 | 1.42E-06 |
| SAP18   | -0.0251 | 6.30E-01 | 7.37E-01 |
| SAP30BP | 0.2616  | 3.19E-07 | 4.12E-06 |
| SAP30L  | 0.0243  | 6.41E-01 | 7.47E-01 |
| SAP30   | 0.1608  | 1.89E-03 | 7.33E-03 |
| SAPS1   | 0.1130  | 2.95E-02 | 7.04E-02 |
| SAPS2   | -0.0462 | 3.75E-01 | 5.08E-01 |
| SAPS3   | 0.0187  | 7.20E-01 | 8.10E-01 |
| SAR1A   | -0.0747 | 1.51E-01 | 2.55E-01 |
| SAR1B   | -0.1959 | 1.46E-04 | 8.43E-04 |
| SARDH   | -0.2440 | 1.98E-06 | 2.08E-05 |

|        |         |          |          |
|--------|---------|----------|----------|
| SARM1  | 0.1188  | 2.21E-02 | 5.56E-02 |
| SARNP  | 0.1245  | 1.65E-02 | 4.38E-02 |
| SARS2  | -0.0791 | 1.28E-01 | 2.25E-01 |
| SARS   | -0.0730 | 1.61E-01 | 2.68E-01 |
| SART1  | 0.1530  | 3.12E-03 | 1.12E-02 |
| SART3  | 0.2294  | 8.11E-06 | 6.97E-05 |
| SASH1  | -0.1104 | 3.36E-02 | 7.84E-02 |
| SASH3  | -0.0578 | 2.67E-01 | 3.94E-01 |
| SASS6  | 0.3482  | 5.19E-12 | 2.00E-10 |
| SAT1   | -0.3053 | 1.92E-09 | 4.27E-08 |
| SAT2   | -0.1484 | 4.17E-03 | 1.42E-02 |
| SATB1  | -0.1742 | 7.50E-04 | 3.36E-03 |
| SATB2  | -0.1149 | 2.69E-02 | 6.53E-02 |
| SATL1  | 0.0022  | 9.67E-01 | 9.79E-01 |
| SAV1   | -0.1808 | 4.66E-04 | 2.24E-03 |
| SBDSP1 | -0.1162 | 2.52E-02 | 6.20E-02 |
| SBDS   | -0.3014 | 3.16E-09 | 6.61E-08 |
| SBF1P1 | 0.0924  | 7.54E-02 | 1.49E-01 |
| SBF1   | 0.1341  | 9.71E-03 | 2.86E-02 |
| SBF2   | -0.1120 | 3.10E-02 | 7.33E-02 |
| SBK1   | 0.2352  | 4.67E-06 | 4.38E-05 |
| SBK2   | -0.0517 | 3.20E-01 | 4.51E-01 |
| SBNO1  | -0.0376 | 4.70E-01 | 6.00E-01 |
| SBNO2  | 0.0442  | 3.96E-01 | 5.28E-01 |
| SBSN   | 0.0070  | 8.93E-01 | 9.31E-01 |
| SC4MOL | -0.2903 | 1.23E-08 | 2.23E-07 |
| SC5DL  | -0.2575 | 4.95E-07 | 6.07E-06 |
| SC65   | 0.2317  | 6.48E-06 | 5.78E-05 |
| SCAF1  | 0.2149  | 2.99E-05 | 2.19E-04 |
| SCAI   | 0.2532  | 7.80E-07 | 9.07E-06 |
| SCAMP1 | -0.1117 | 3.15E-02 | 7.43E-02 |
| SCAMP2 | 0.0050  | 9.23E-01 | 9.51E-01 |
| SCAMP3 | 0.4927  | 4.40E-24 | 2.19E-21 |
| SCAMP4 | 0.1150  | 2.67E-02 | 6.51E-02 |
| SCAMP5 | 0.1528  | 3.17E-03 | 1.13E-02 |
| SCAND1 | -0.0786 | 1.31E-01 | 2.28E-01 |
| SCAND2 | 0.1276  | 1.39E-02 | 3.83E-02 |
| SCAND3 | 0.1080  | 3.76E-02 | 8.59E-02 |
| SCAPER | 0.0334  | 5.22E-01 | 6.45E-01 |
| SCAP   | -0.0937 | 7.14E-02 | 1.42E-01 |
| SCARA3 | 0.0393  | 4.51E-01 | 5.82E-01 |
| SCARA5 | -0.1048 | 4.36E-02 | 9.65E-02 |
| SCARB1 | -0.0504 | 3.33E-01 | 4.64E-01 |
| SCARB2 | -0.1524 | 3.26E-03 | 1.16E-02 |

|          |         |          |          |
|----------|---------|----------|----------|
| SCARF1   | -0.2062 | 6.28E-05 | 4.10E-04 |
| SCARF2   | -0.1430 | 5.78E-03 | 1.86E-02 |
| SCARNA10 | 0.0041  | 9.38E-01 | 9.61E-01 |
| SCARNA11 | 0.0861  | 9.76E-02 | 1.83E-01 |
| SCARNA12 | 0.2584  | 4.49E-07 | 5.56E-06 |
| SCARNA14 | 0.0841  | 1.06E-01 | 1.94E-01 |
| SCARNA15 | 0.0540  | 3.00E-01 | 4.29E-01 |
| SCARNA16 | 0.1986  | 1.18E-04 | 7.02E-04 |
| SCARNA17 | -0.1081 | 3.74E-02 | 8.56E-02 |
| SCARNA18 | 0.0663  | 2.03E-01 | 3.20E-01 |
| SCARNA1  | 0.0437  | 4.01E-01 | 5.34E-01 |
| SCARNA21 | 0.0203  | 6.97E-01 | 7.91E-01 |
| SCARNA22 | 0.0796  | 1.26E-01 | 2.22E-01 |
| SCARNA2  | -0.0707 | 1.74E-01 | 2.85E-01 |
| SCARNA3  | -0.0064 | 9.03E-01 | 9.38E-01 |
| SCARNA4  | 0.0223  | 6.69E-01 | 7.69E-01 |
| SCARNA5  | -0.0704 | 1.76E-01 | 2.86E-01 |
| SCARNA6  | 0.0464  | 3.73E-01 | 5.06E-01 |
| SCARNA7  | -0.0531 | 3.08E-01 | 4.38E-01 |
| SCARNA8  | 0.0634  | 2.23E-01 | 3.44E-01 |
| SCARNA9L | 0.0097  | 8.53E-01 | 9.04E-01 |
| SCARNA9  | -0.0711 | 1.72E-01 | 2.81E-01 |
| SCCPDH   | -0.0091 | 8.61E-01 | 9.10E-01 |
| SCD5     | -0.0457 | 3.80E-01 | 5.14E-01 |
| SCD      | -0.1217 | 1.90E-02 | 4.93E-02 |
| SCEL     | -0.0154 | 7.67E-01 | 8.43E-01 |
| SCFD1    | -0.0432 | 4.06E-01 | 5.39E-01 |
| SCFD2    | -0.0549 | 2.92E-01 | 4.21E-01 |
| SCG2     | 0.0060  | 9.09E-01 | 9.43E-01 |
| SCG3     | 0.0054  | 9.18E-01 | 9.48E-01 |
| SCG5     | 0.0640  | 2.18E-01 | 3.39E-01 |
| SCGB1A1  | 0.0702  | 1.77E-01 | 2.88E-01 |
| SCGB1C1  | -0.0815 | 1.17E-01 | 2.10E-01 |
| SCGB1D2  | 0.1046  | 4.42E-02 | 9.75E-02 |
| SCGB2A1  | 0.2191  | 2.06E-05 | 1.59E-04 |
| SCGB2A2  | -0.0263 | 6.14E-01 | 7.24E-01 |
| SCGB3A1  | -0.1481 | 4.25E-03 | 1.44E-02 |
| SCGB3A2  | -0.0292 | 5.75E-01 | 6.92E-01 |
| SCGBL    | -0.1354 | 9.03E-03 | 2.69E-02 |
| SCGN     | 0.0516  | 3.22E-01 | 4.52E-01 |
| SCHIP1   | -0.1045 | 4.44E-02 | 9.78E-02 |
| SCIN     | 0.0751  | 1.49E-01 | 2.52E-01 |
| SCLT1    | 0.1429  | 5.82E-03 | 1.87E-02 |
| SCLY     | 0.0145  | 7.81E-01 | 8.54E-01 |

|        |         |          |          |
|--------|---------|----------|----------|
| SCMH1  | 0.3085  | 1.27E-09 | 2.94E-08 |
| SCML1  | 0.0931  | 7.34E-02 | 1.46E-01 |
| SCML2  | 0.2865  | 1.94E-08 | 3.37E-07 |
| SCML4  | -0.1245 | 1.64E-02 | 4.38E-02 |
| SCN10A | -0.0884 | 8.89E-02 | 1.69E-01 |
| SCN11A | -0.1039 | 4.55E-02 | 9.99E-02 |
| SCN1A  | 0.0106  | 8.39E-01 | 8.94E-01 |
| SCN1B  | -0.0984 | 5.82E-02 | 1.21E-01 |
| SCN2A  | -0.0009 | 9.86E-01 | 9.91E-01 |
| SCN2B  | -0.1255 | 1.56E-02 | 4.19E-02 |
| SCN3A  | -0.0535 | 3.04E-01 | 4.33E-01 |
| SCN3B  | 0.0140  | 7.88E-01 | 8.59E-01 |
| SCN4A  | -0.1744 | 7.39E-04 | 3.32E-03 |
| SCN4B  | -0.2173 | 2.42E-05 | 1.83E-04 |
| SCN5A  | 0.0437  | 4.02E-01 | 5.35E-01 |
| SCN7A  | -0.1341 | 9.73E-03 | 2.86E-02 |
| SCN8A  | 0.0349  | 5.02E-01 | 6.28E-01 |
| SCN9A  | 0.0116  | 8.23E-01 | 8.84E-01 |
| SCNM1  | 0.5857  | 1.55E-35 | 2.37E-32 |
| SCNN1A | -0.0528 | 3.10E-01 | 4.40E-01 |
| SCNN1B | 0.0833  | 1.09E-01 | 1.99E-01 |
| SCNN1D | 0.0887  | 8.79E-02 | 1.68E-01 |
| SCNN1G | 0.0317  | 5.42E-01 | 6.63E-01 |
| SCO1   | -0.2167 | 2.55E-05 | 1.91E-04 |
| SCO2   | -0.0332 | 5.24E-01 | 6.48E-01 |
| SCOC   | -0.1781 | 5.68E-04 | 2.65E-03 |
| SCP2   | -0.2608 | 3.48E-07 | 4.44E-06 |
| SCPEP1 | 0.0356  | 4.94E-01 | 6.21E-01 |
| SCRG1  | -0.0938 | 7.10E-02 | 1.42E-01 |
| SCRIB  | 0.1215  | 1.93E-02 | 4.98E-02 |
| SCRN1  | 0.0698  | 1.80E-01 | 2.92E-01 |
| SCRN2  | -0.1818 | 4.33E-04 | 2.11E-03 |
| SCRN3  | -0.0693 | 1.83E-01 | 2.96E-01 |
| SCRT1  | 0.0998  | 5.47E-02 | 1.15E-01 |
| SCRT2  | 0.0117  | 8.22E-01 | 8.83E-01 |
| SCTR   | 0.0893  | 8.60E-02 | 1.65E-01 |
| SCT    | 0.0931  | 7.32E-02 | 1.45E-01 |
| SCUBE1 | -0.0916 | 7.82E-02 | 1.53E-01 |
| SCUBE2 | -0.0705 | 1.76E-01 | 2.86E-01 |
| SCUBE3 | 0.0424  | 4.16E-01 | 5.48E-01 |
| SCXB   | 0.2790  | 4.62E-08 | 7.28E-07 |
| SCYL1  | -0.1874 | 2.83E-04 | 1.48E-03 |
| SCYL2  | -0.1025 | 4.86E-02 | 1.05E-01 |
| SCYL3  | 0.3185  | 3.44E-10 | 9.17E-09 |

|         |         |          |          |
|---------|---------|----------|----------|
| SDAD1   | -0.0218 | 6.76E-01 | 7.75E-01 |
| SDC1    | -0.2163 | 2.66E-05 | 1.97E-04 |
| SDC2    | -0.0865 | 9.61E-02 | 1.80E-01 |
| SDC3    | 0.0123  | 8.14E-01 | 8.77E-01 |
| SDC4P   | 0.0138  | 7.91E-01 | 8.61E-01 |
| SDC4    | -0.0484 | 3.52E-01 | 4.84E-01 |
| SDCBP2  | -0.1471 | 4.53E-03 | 1.52E-02 |
| SDCBP   | -0.2209 | 1.76E-05 | 1.38E-04 |
| SDCCAG1 | -0.0005 | 9.93E-01 | 9.96E-01 |
| SDCCAG3 | -0.0025 | 9.61E-01 | 9.76E-01 |
| SDCCAG8 | 0.2069  | 5.92E-05 | 3.91E-04 |
| SDF2L1  | 0.0832  | 1.10E-01 | 2.00E-01 |
| SDF2    | 0.1566  | 2.49E-03 | 9.25E-03 |
| SDF4    | -0.1744 | 7.43E-04 | 3.33E-03 |
| SDHAF1  | 0.0585  | 2.61E-01 | 3.87E-01 |
| SDHAF2  | 0.0643  | 2.17E-01 | 3.37E-01 |
| SDHAP1  | 0.3048  | 2.04E-09 | 4.52E-08 |
| SDHAP2  | 0.2706  | 1.19E-07 | 1.70E-06 |
| SDHAP3  | 0.0304  | 5.59E-01 | 6.77E-01 |
| SDHA    | -0.3443 | 9.15E-12 | 3.32E-10 |
| SDHB    | -0.3298 | 7.29E-11 | 2.21E-09 |
| SDHC    | 0.1414  | 6.39E-03 | 2.02E-02 |
| SDHD    | -0.3306 | 6.51E-11 | 1.99E-09 |
| SDK1    | 0.1078  | 3.80E-02 | 8.65E-02 |
| SDK2    | 0.0158  | 7.62E-01 | 8.40E-01 |
| SDPR    | -0.1884 | 2.63E-04 | 1.39E-03 |
| SDR16C5 | -0.0392 | 4.52E-01 | 5.83E-01 |
| SDR39U1 | -0.1053 | 4.26E-02 | 9.47E-02 |
| SDR42E1 | 0.0159  | 7.61E-01 | 8.39E-01 |
| SDR9C7  | 0.1221  | 1.87E-02 | 4.85E-02 |
| SDSL    | -0.1914 | 2.08E-04 | 1.14E-03 |
| SDS     | -0.1821 | 4.25E-04 | 2.08E-03 |
| SEBOX   | 0.0221  | 6.72E-01 | 7.71E-01 |
| SEC11A  | -0.0177 | 7.34E-01 | 8.20E-01 |
| SEC11C  | 0.0556  | 2.85E-01 | 4.14E-01 |
| SEC13   | -0.0231 | 6.57E-01 | 7.59E-01 |
| SEC14L1 | -0.1166 | 2.47E-02 | 6.09E-02 |
| SEC14L2 | -0.2590 | 4.25E-07 | 5.31E-06 |
| SEC14L3 | -0.1646 | 1.46E-03 | 5.91E-03 |
| SEC14L4 | 0.0623  | 2.31E-01 | 3.54E-01 |
| SEC14L5 | -0.0270 | 6.04E-01 | 7.17E-01 |
| SEC16A  | 0.0831  | 1.10E-01 | 2.01E-01 |
| SEC16B  | 0.0032  | 9.51E-01 | 9.70E-01 |
| SEC1    | 0.0644  | 2.16E-01 | 3.36E-01 |

|           |         |          |          |
|-----------|---------|----------|----------|
| SEC22A    | 0.2268  | 1.03E-05 | 8.62E-05 |
| SEC22B    | -0.0734 | 1.58E-01 | 2.64E-01 |
| SEC22C    | -0.0878 | 9.13E-02 | 1.73E-01 |
| SEC23A    | -0.2204 | 1.84E-05 | 1.43E-04 |
| SEC23B    | 0.1083  | 3.71E-02 | 8.49E-02 |
| SEC23IP   | -0.0343 | 5.10E-01 | 6.35E-01 |
| SEC24A    | -0.1718 | 8.95E-04 | 3.91E-03 |
| SEC24B    | -0.1413 | 6.41E-03 | 2.02E-02 |
| SEC24C    | 0.0619  | 2.35E-01 | 3.58E-01 |
| SEC24D    | -0.1438 | 5.52E-03 | 1.79E-02 |
| SEC31A    | -0.0804 | 1.22E-01 | 2.17E-01 |
| SEC31B    | -0.0641 | 2.18E-01 | 3.38E-01 |
| SEC61A1   | 0.0413  | 4.27E-01 | 5.60E-01 |
| SEC61A2   | 0.1461  | 4.82E-03 | 1.60E-02 |
| SEC61B    | 0.0657  | 2.06E-01 | 3.24E-01 |
| SEC61G    | 0.1324  | 1.07E-02 | 3.08E-02 |
| SEC62     | -0.2486 | 1.25E-06 | 1.38E-05 |
| SEC63     | 0.0887  | 8.80E-02 | 1.68E-01 |
| SECISBP2L | -0.1400 | 6.90E-03 | 2.15E-02 |
| SECISBP2  | 0.0191  | 7.13E-01 | 8.04E-01 |
| SECTM1    | 0.1240  | 1.69E-02 | 4.47E-02 |
| SEH1L     | 0.1575  | 2.35E-03 | 8.79E-03 |
| SEL1L2    | -0.0397 | 4.46E-01 | 5.77E-01 |
| SEL1L3    | 0.1191  | 2.17E-02 | 5.49E-02 |
| SEL1L     | -0.2295 | 7.97E-06 | 6.87E-05 |
| SELENBP1  | -0.0346 | 5.07E-01 | 6.32E-01 |
| SELE      | -0.2719 | 1.04E-07 | 1.50E-06 |
| SELK      | 0.0097  | 8.52E-01 | 9.04E-01 |
| SELL      | -0.0546 | 2.94E-01 | 4.23E-01 |
| SELM      | 0.1574  | 2.36E-03 | 8.82E-03 |
| SELO      | -0.2428 | 2.22E-06 | 2.29E-05 |
| SELPLG    | -0.0875 | 9.25E-02 | 1.75E-01 |
| SELP      | -0.2216 | 1.65E-05 | 1.31E-04 |
| SELS      | 0.0160  | 7.58E-01 | 8.38E-01 |
| SELT      | -0.0751 | 1.49E-01 | 2.53E-01 |
| SELV      | 0.0785  | 1.31E-01 | 2.29E-01 |
| SEMA3A    | 0.0044  | 9.32E-01 | 9.58E-01 |
| SEMA3B    | -0.0107 | 8.37E-01 | 8.93E-01 |
| SEMA3C    | -0.0289 | 5.79E-01 | 6.96E-01 |
| SEMA3D    | -0.0281 | 5.90E-01 | 7.04E-01 |
| SEMA3E    | 0.0952  | 6.69E-02 | 1.35E-01 |
| SEMA3F    | -0.0406 | 4.36E-01 | 5.67E-01 |
| SEMA3G    | -0.1667 | 1.27E-03 | 5.28E-03 |
| SEMA4A    | 0.1117  | 3.14E-02 | 7.42E-02 |

|         |         |          |          |
|---------|---------|----------|----------|
| SEMA4B  | 0.0201  | 7.00E-01 | 7.93E-01 |
| SEMA4C  | 0.1235  | 1.73E-02 | 4.57E-02 |
| SEMA4D  | 0.0963  | 6.38E-02 | 1.30E-01 |
| SEMA4F  | 0.1806  | 4.72E-04 | 2.26E-03 |
| SEMA4G  | 0.0020  | 9.69E-01 | 9.81E-01 |
| SEMA5A  | -0.0069 | 8.95E-01 | 9.33E-01 |
| SEMA5B  | 0.1253  | 1.57E-02 | 4.22E-02 |
| SEMA6A  | 0.0705  | 1.75E-01 | 2.86E-01 |
| SEMA6B  | -0.0668 | 1.99E-01 | 3.16E-01 |
| SEMA6C  | 0.3440  | 9.63E-12 | 3.45E-10 |
| SEMA6D  | -0.0348 | 5.03E-01 | 6.29E-01 |
| SEMA7A  | -0.0491 | 3.45E-01 | 4.77E-01 |
| SEMG1   | 0.1012  | 5.13E-02 | 1.10E-01 |
| SEMG2   | -0.0028 | 9.57E-01 | 9.73E-01 |
| SENP1   | 0.2505  | 1.03E-06 | 1.16E-05 |
| SENP2   | 0.0323  | 5.35E-01 | 6.58E-01 |
| SENP3   | 0.1442  | 5.39E-03 | 1.76E-02 |
| SENP5   | 0.1754  | 6.91E-04 | 3.13E-03 |
| SENP6   | 0.1168  | 2.45E-02 | 6.05E-02 |
| SENP7   | 0.0707  | 1.74E-01 | 2.84E-01 |
| SENP8   | -0.1819 | 4.31E-04 | 2.10E-03 |
| 15-Sep  | -0.0106 | 8.38E-01 | 8.94E-01 |
| SEPHS1  | 0.0998  | 5.47E-02 | 1.15E-01 |
| SEPHS2  | -0.1890 | 2.52E-04 | 1.34E-03 |
| SEPN1   | 0.0818  | 1.16E-01 | 2.09E-01 |
| SEPP1   | -0.1664 | 1.30E-03 | 5.36E-03 |
| SEPSECS | -0.2101 | 4.54E-05 | 3.11E-04 |
| 10-Sep  | -0.0433 | 4.06E-01 | 5.39E-01 |
| 11-Sep  | -0.1658 | 1.35E-03 | 5.52E-03 |
| 12-Sep  | 0.2070  | 5.88E-05 | 3.89E-04 |
| 14-Sep  | 0.1814  | 4.45E-04 | 2.16E-03 |
| 1-Sep   | -0.0166 | 7.50E-01 | 8.31E-01 |
| 2-Sep   | 0.1242  | 1.67E-02 | 4.44E-02 |
| 3-Sep   | 0.2781  | 5.14E-08 | 7.99E-07 |
| 4-Sep   | -0.1630 | 1.63E-03 | 6.50E-03 |
| 5-Sep   | 0.1729  | 8.27E-04 | 3.65E-03 |
| 6-Sep   | 0.0823  | 1.13E-01 | 2.05E-01 |
| SEPT7L  | 0.1011  | 5.17E-02 | 1.10E-01 |
| SEPT7P2 | 0.2051  | 6.92E-05 | 4.47E-04 |
| 7-Sep   | 0.0195  | 7.09E-01 | 8.01E-01 |
| 8-Sep   | 0.1719  | 8.87E-04 | 3.88E-03 |
| 9-Sep   | 0.2015  | 9.30E-05 | 5.73E-04 |
| SEPW1   | 0.0275  | 5.98E-01 | 7.12E-01 |
| SEPX1   | -0.1793 | 5.22E-04 | 2.47E-03 |

|           |         |          |          |
|-----------|---------|----------|----------|
| SERAC1    | 0.2145  | 3.10E-05 | 2.25E-04 |
| SERBP1    | 0.0625  | 2.29E-01 | 3.52E-01 |
| SERF1A    | 0.1993  | 1.12E-04 | 6.68E-04 |
| SERF2     | -0.0735 | 1.58E-01 | 2.64E-01 |
| SERGEF    | 0.1113  | 3.21E-02 | 7.55E-02 |
| SERHL2    | 0.0447  | 3.91E-01 | 5.24E-01 |
| SERHL     | 0.1307  | 1.18E-02 | 3.33E-02 |
| SERINC1   | -0.1524 | 3.25E-03 | 1.15E-02 |
| SERINC2   | -0.1788 | 5.41E-04 | 2.54E-03 |
| SERINC3   | -0.1995 | 1.10E-04 | 6.58E-04 |
| SERINC4   | 0.1828  | 4.03E-04 | 1.99E-03 |
| SERINC5   | -0.0969 | 6.23E-02 | 1.28E-01 |
| SERP1     | -0.0439 | 3.99E-01 | 5.32E-01 |
| SERP2     | 0.0544  | 2.96E-01 | 4.25E-01 |
| SERPINA10 | -0.1447 | 5.22E-03 | 1.71E-02 |
| SERPINA11 | -0.1222 | 1.86E-02 | 4.84E-02 |
| SERPINA12 | 0.1575  | 2.35E-03 | 8.81E-03 |
| SERPINA13 | 0.1076  | 3.84E-02 | 8.73E-02 |
| SERPINA1  | -0.1387 | 7.47E-03 | 2.30E-02 |
| SERPINA3  | -0.0703 | 1.77E-01 | 2.87E-01 |
| SERPINA4  | -0.1210 | 1.98E-02 | 5.09E-02 |
| SERPINA5  | -0.0084 | 8.71E-01 | 9.17E-01 |
| SERPINA6  | -0.1114 | 3.20E-02 | 7.52E-02 |
| SERPINA7  | -0.0763 | 1.42E-01 | 2.44E-01 |
| SERPINA9  | 0.0353  | 4.98E-01 | 6.24E-01 |
| SERPINB10 | 0.0802  | 1.23E-01 | 2.18E-01 |
| SERPINB11 | 0.0014  | 9.79E-01 | 9.86E-01 |
| SERPINB12 | -0.0303 | 5.61E-01 | 6.79E-01 |
| SERPINB13 | -0.0622 | 2.32E-01 | 3.55E-01 |
| SERPINB1  | 0.0584  | 2.62E-01 | 3.88E-01 |
| SERPINB2  | 0.0613  | 2.39E-01 | 3.63E-01 |
| SERPINB3  | -0.0544 | 2.96E-01 | 4.25E-01 |
| SERPINB4  | -0.0606 | 2.44E-01 | 3.69E-01 |
| SERPINB5  | -0.0028 | 9.57E-01 | 9.73E-01 |
| SERPINB6  | 0.0469  | 3.68E-01 | 5.01E-01 |
| SERPINB7  | 0.0056  | 9.15E-01 | 9.47E-01 |
| SERPINB8  | -0.1090 | 3.58E-02 | 8.24E-02 |
| SERPINB9  | -0.0525 | 3.13E-01 | 4.42E-01 |
| SERPINC1  | -0.1147 | 2.71E-02 | 6.58E-02 |
| SERPIND1  | -0.0875 | 9.25E-02 | 1.75E-01 |
| SERPINE1  | 0.0056  | 9.15E-01 | 9.47E-01 |
| SERPINE2  | 0.0491  | 3.45E-01 | 4.77E-01 |
| SERPINE3  | 0.0414  | 4.27E-01 | 5.59E-01 |
| SERPINF1  | -0.1658 | 1.35E-03 | 5.54E-03 |



|          |         |          |          |
|----------|---------|----------|----------|
| SERPINF2 | -0.0697 | 1.80E-01 | 2.92E-01 |
| SERPING1 | -0.3603 | 8.17E-13 | 3.73E-11 |
| SERPINH1 | 0.1308  | 1.17E-02 | 3.32E-02 |
| SERPINI1 | 0.1076  | 3.82E-02 | 8.70E-02 |
| SERPINI2 | 0.0529  | 3.10E-01 | 4.39E-01 |
| SERTAD1  | -0.1582 | 2.24E-03 | 8.45E-03 |
| SERTAD2  | 0.1249  | 1.61E-02 | 4.30E-02 |
| SERTAD3  | 0.0541  | 2.98E-01 | 4.28E-01 |
| SERTAD4  | -0.0412 | 4.29E-01 | 5.61E-01 |
| SESN1    | -0.0620 | 2.34E-01 | 3.57E-01 |
| SESN2    | -0.1906 | 2.22E-04 | 1.20E-03 |
| SESN3    | -0.1884 | 2.64E-04 | 1.39E-03 |
| SESTD1   | 0.1387  | 7.44E-03 | 2.29E-02 |
| SETBP1   | -0.0815 | 1.17E-01 | 2.10E-01 |
| SETD1A   | 0.1477  | 4.35E-03 | 1.47E-02 |
| SETD1B   | 0.1017  | 5.04E-02 | 1.08E-01 |
| SETD2    | 0.0349  | 5.03E-01 | 6.28E-01 |
| SETD3    | -0.2068 | 5.96E-05 | 3.92E-04 |
| SETD4    | 0.2384  | 3.44E-06 | 3.35E-05 |
| SETD5    | 0.1740  | 7.62E-04 | 3.41E-03 |
| SETD6    | -0.0665 | 2.01E-01 | 3.18E-01 |
| SETD7    | -0.3014 | 3.13E-09 | 6.57E-08 |
| SETD8    | 0.2279  | 9.27E-06 | 7.85E-05 |
| SETDB1   | 0.6717  | 5.07E-50 | 5.05E-46 |
| SETDB2   | 0.0763  | 1.42E-01 | 2.44E-01 |
| SETMAR   | 0.0621  | 2.33E-01 | 3.56E-01 |
| SETX     | 0.0594  | 2.54E-01 | 3.79E-01 |
| SET      | 0.2840  | 2.59E-08 | 4.32E-07 |
| SEZ6L2   | 0.0443  | 3.95E-01 | 5.28E-01 |
| SEZ6L    | 0.0293  | 5.74E-01 | 6.91E-01 |
| SEZ6     | 0.2050  | 6.97E-05 | 4.49E-04 |
| SF1      | 0.2265  | 1.05E-05 | 8.82E-05 |
| SF3A1    | 0.1357  | 8.89E-03 | 2.66E-02 |
| SF3A2    | 0.3548  | 1.91E-12 | 7.99E-11 |
| SF3A3    | 0.2227  | 1.50E-05 | 1.20E-04 |
| SF3B14   | 0.1359  | 8.77E-03 | 2.63E-02 |
| SF3B1    | 0.1569  | 2.44E-03 | 9.08E-03 |
| SF3B2    | 0.1733  | 8.01E-04 | 3.55E-03 |
| SF3B3    | 0.0728  | 1.62E-01 | 2.69E-01 |
| SF3B4    | 0.6445  | 6.25E-45 | 2.07E-41 |
| SF3B5    | 0.1404  | 6.75E-03 | 2.11E-02 |
| SF4      | 0.2081  | 5.38E-05 | 3.60E-04 |
| SFI1     | 0.3823  | 2.33E-14 | 1.41E-12 |
| SFMBT1   | 0.0387  | 4.57E-01 | 5.88E-01 |

|           |         |          |          |
|-----------|---------|----------|----------|
| SFMBT2    | -0.1369 | 8.27E-03 | 2.50E-02 |
| SFN       | 0.1563  | 2.54E-03 | 9.38E-03 |
| SFPQ      | 0.4384  | 7.44E-19 | 1.38E-16 |
| SFRP1     | -0.1568 | 2.46E-03 | 9.13E-03 |
| SFRP2     | -0.0596 | 2.52E-01 | 3.78E-01 |
| SFRP4     | -0.1164 | 2.50E-02 | 6.15E-02 |
| SFRP5     | 0.1543  | 2.88E-03 | 1.04E-02 |
| SFRS11    | 0.2354  | 4.56E-06 | 4.30E-05 |
| SFRS12IP1 | 0.0880  | 9.06E-02 | 1.72E-01 |
| SFRS12    | 0.1475  | 4.42E-03 | 1.49E-02 |
| SFRS13A   | 0.1707  | 9.66E-04 | 4.18E-03 |
| SFRS13B   | 0.2596  | 3.97E-07 | 4.99E-06 |
| SFRS14    | 0.2723  | 9.97E-08 | 1.45E-06 |
| SFRS15    | 0.1674  | 1.21E-03 | 5.06E-03 |
| SFRS16    | 0.3179  | 3.71E-10 | 9.78E-09 |
| SFRS17A   | 0.2806  | 3.85E-08 | 6.19E-07 |
| SFRS18    | 0.2781  | 5.15E-08 | 8.00E-07 |
| SFRS1     | 0.3557  | 1.67E-12 | 7.13E-11 |
| SFRS2B    | -0.1634 | 1.59E-03 | 6.37E-03 |
| SFRS2IP   | 0.0149  | 7.75E-01 | 8.50E-01 |
| SFRS2     | 0.4109  | 1.52E-16 | 1.49E-14 |
| SFRS3     | 0.3991  | 1.30E-15 | 1.01E-13 |
| SFRS4     | 0.0413  | 4.28E-01 | 5.61E-01 |
| SFRS5     | -0.1080 | 3.76E-02 | 8.58E-02 |
| SFRS6     | 0.2010  | 9.67E-05 | 5.92E-04 |
| SFRS7     | 0.3745  | 8.53E-14 | 4.57E-12 |
| SFRS8     | 0.3017  | 3.04E-09 | 6.40E-08 |
| SFRS9     | 0.1015  | 5.08E-02 | 1.09E-01 |
| SFT2D1    | 0.2637  | 2.55E-07 | 3.37E-06 |
| SFT2D2    | 0.1747  | 7.24E-04 | 3.26E-03 |
| SFT2D3    | 0.1358  | 8.83E-03 | 2.64E-02 |
| SFTA1P    | -0.1040 | 4.52E-02 | 9.93E-02 |
| SFTA2     | -0.0133 | 7.98E-01 | 8.67E-01 |
| SFTA3     | 0.0527  | 3.11E-01 | 4.40E-01 |
| SFTPA1    | -0.0342 | 5.12E-01 | 6.36E-01 |
| SFTPA2    | 0.0541  | 2.98E-01 | 4.28E-01 |
| SFTPB     | -0.0151 | 7.71E-01 | 8.46E-01 |
| SFTPC     | -0.0477 | 3.59E-01 | 4.91E-01 |
| SFTPD     | -0.1105 | 3.34E-02 | 7.80E-02 |
| SFXN1     | -0.3093 | 1.15E-09 | 2.68E-08 |
| SFXN2     | -0.1702 | 9.97E-04 | 4.29E-03 |
| SFXN3     | 0.0048  | 9.27E-01 | 9.54E-01 |
| SFXN4     | -0.0751 | 1.49E-01 | 2.52E-01 |
| SFXN5     | -0.1350 | 9.23E-03 | 2.74E-02 |

|          |         |          |          |
|----------|---------|----------|----------|
| SGCA     | -0.0663 | 2.03E-01 | 3.20E-01 |
| SGCB     | 0.0354  | 4.96E-01 | 6.22E-01 |
| SGCD     | -0.1401 | 6.89E-03 | 2.15E-02 |
| SGCE     | 0.1322  | 1.08E-02 | 3.10E-02 |
| SGCG     | 0.0785  | 1.31E-01 | 2.29E-01 |
| SGCZ     | 0.1260  | 1.52E-02 | 4.10E-02 |
| SGEF     | -0.1765 | 6.40E-04 | 2.93E-03 |
| SGIP1    | 0.0487  | 3.49E-01 | 4.81E-01 |
| SGK196   | 0.0710  | 1.72E-01 | 2.82E-01 |
| SGK1     | -0.0705 | 1.75E-01 | 2.86E-01 |
| SGK223   | -0.0611 | 2.40E-01 | 3.64E-01 |
| SGK269   | -0.0802 | 1.23E-01 | 2.18E-01 |
| SGK2     | -0.1028 | 4.79E-02 | 1.04E-01 |
| SGK3     | -0.1577 | 2.31E-03 | 8.69E-03 |
| SGK494   | 0.4195  | 3.04E-17 | 3.52E-15 |
| SGMS1    | -0.1384 | 7.58E-03 | 2.33E-02 |
| SGMS2    | -0.1536 | 3.01E-03 | 1.08E-02 |
| SGOL1    | 0.3621  | 6.16E-13 | 2.85E-11 |
| SGOL2    | 0.4307  | 3.44E-18 | 5.12E-16 |
| SGPL1    | -0.1625 | 1.69E-03 | 6.69E-03 |
| SGPP1    | -0.1509 | 3.58E-03 | 1.25E-02 |
| SGPP2    | 0.0710  | 1.72E-01 | 2.82E-01 |
| SGSH     | 0.1442  | 5.39E-03 | 1.76E-02 |
| SGSM1    | 0.2022  | 8.78E-05 | 5.46E-04 |
| SGSM2    | 0.0501  | 3.36E-01 | 4.68E-01 |
| SGSM3    | 0.1018  | 5.01E-02 | 1.08E-01 |
| SGTA     | -0.0295 | 5.71E-01 | 6.88E-01 |
| SGTB     | 0.1015  | 5.08E-02 | 1.09E-01 |
| SH2B1    | 0.0363  | 4.85E-01 | 6.13E-01 |
| SH2B2    | 0.0637  | 2.21E-01 | 3.41E-01 |
| SH2B3    | -0.0850 | 1.02E-01 | 1.89E-01 |
| SH2D1A   | -0.0771 | 1.38E-01 | 2.38E-01 |
| SH2D1B   | -0.0870 | 9.41E-02 | 1.77E-01 |
| SH2D2A   | 0.0718  | 1.68E-01 | 2.76E-01 |
| SH2D3A   | 0.0565  | 2.78E-01 | 4.07E-01 |
| SH2D3C   | -0.1233 | 1.75E-02 | 4.61E-02 |
| SH2D4A   | 0.0179  | 7.32E-01 | 8.18E-01 |
| SH2D4B   | 0.0092  | 8.60E-01 | 9.10E-01 |
| SH2D5    | 0.1086  | 3.66E-02 | 8.40E-02 |
| SH2D6    | 0.1065  | 4.03E-02 | 9.07E-02 |
| SH2D7    | 0.1465  | 4.68E-03 | 1.56E-02 |
| SH3BGRL2 | -0.1628 | 1.66E-03 | 6.59E-03 |
| SH3BGRL3 | 0.0321  | 5.38E-01 | 6.60E-01 |
| SH3BGRL  | -0.0758 | 1.45E-01 | 2.47E-01 |

|          |         |          |          |
|----------|---------|----------|----------|
| SH3BGR   | -0.1450 | 5.13E-03 | 1.69E-02 |
| SH3BP1   | 0.2101  | 4.52E-05 | 3.10E-04 |
| SH3BP2   | -0.0877 | 9.18E-02 | 1.74E-01 |
| SH3BP4   | -0.0396 | 4.46E-01 | 5.78E-01 |
| SH3BP5L  | 0.2632  | 2.69E-07 | 3.54E-06 |
| SH3BP5   | -0.2868 | 1.85E-08 | 3.24E-07 |
| SH3D19   | -0.3154 | 5.19E-10 | 1.30E-08 |
| SH3D20   | -0.0152 | 7.71E-01 | 8.46E-01 |
| SH3GL1   | 0.0105  | 8.40E-01 | 8.95E-01 |
| SH3GL2   | 0.0182  | 7.27E-01 | 8.15E-01 |
| SH3GL3   | -0.0665 | 2.01E-01 | 3.18E-01 |
| SH3GLB1  | -0.0508 | 3.29E-01 | 4.60E-01 |
| SH3GLB2  | 0.2101  | 4.52E-05 | 3.10E-04 |
| SH3KBP1  | -0.1634 | 1.59E-03 | 6.37E-03 |
| SH3PXD2A | 0.0785  | 1.31E-01 | 2.29E-01 |
| SH3PXD2B | 0.1146  | 2.73E-02 | 6.61E-02 |
| SH3RF1   | -0.0100 | 8.47E-01 | 9.00E-01 |
| SH3RF2   | 0.0974  | 6.09E-02 | 1.26E-01 |
| SH3RF3   | -0.0756 | 1.46E-01 | 2.49E-01 |
| SH3TC1   | 0.0142  | 7.85E-01 | 8.57E-01 |
| SH3TC2   | -0.0003 | 9.96E-01 | 9.97E-01 |
| SH3YL1   | 0.0364  | 4.84E-01 | 6.12E-01 |
| SHANK1   | -0.0650 | 2.12E-01 | 3.31E-01 |
| SHANK2   | -0.0036 | 9.44E-01 | 9.66E-01 |
| SHANK3   | -0.1755 | 6.85E-04 | 3.11E-03 |
| SHARPIN  | 0.0540  | 3.00E-01 | 4.29E-01 |
| SHBG     | -0.1201 | 2.06E-02 | 5.27E-02 |
| SHB      | -0.1331 | 1.03E-02 | 2.99E-02 |
| SHC1     | 0.3054  | 1.89E-09 | 4.23E-08 |
| SHC2     | -0.2525 | 8.36E-07 | 9.68E-06 |
| SHC3     | -0.0722 | 1.65E-01 | 2.73E-01 |
| SHC4     | -0.1019 | 4.98E-02 | 1.07E-01 |
| SHCBP1   | 0.3471  | 6.05E-12 | 2.30E-10 |
| SHD      | -0.0973 | 6.12E-02 | 1.26E-01 |
| SHE      | -0.0207 | 6.91E-01 | 7.86E-01 |
| SHFM1    | 0.0265  | 6.11E-01 | 7.22E-01 |
| SHF      | -0.1738 | 7.76E-04 | 3.46E-03 |
| SHH      | -0.2309 | 7.01E-06 | 6.18E-05 |
| SHISA2   | -0.0014 | 9.79E-01 | 9.86E-01 |
| SHISA3   | -0.1602 | 1.97E-03 | 7.60E-03 |
| SHISA4   | 0.0034  | 9.47E-01 | 9.67E-01 |
| SHISA5   | -0.1192 | 2.16E-02 | 5.47E-02 |
| SHISA6   | -0.0419 | 4.21E-01 | 5.54E-01 |
| SHISA7   | 0.0554  | 2.87E-01 | 4.16E-01 |

|          |         |          |          |
|----------|---------|----------|----------|
| SHISA9   | 0.0552  | 2.89E-01 | 4.18E-01 |
| SHKBP1   | 0.1515  | 3.44E-03 | 1.21E-02 |
| SHMT1    | -0.2302 | 7.51E-06 | 6.54E-05 |
| SHMT2    | -0.2095 | 4.78E-05 | 3.26E-04 |
| SHOC2    | -0.0791 | 1.28E-01 | 2.25E-01 |
| SHOX2    | 0.2674  | 1.71E-07 | 2.36E-06 |
| SHOX     | -0.0224 | 6.68E-01 | 7.68E-01 |
| SHPK     | -0.3279 | 9.57E-11 | 2.81E-09 |
| SHPRH    | 0.1036  | 4.61E-02 | 1.01E-01 |
| SHQ1     | 0.0313  | 5.47E-01 | 6.68E-01 |
| SHROOM1  | -0.0669 | 1.99E-01 | 3.15E-01 |
| SHROOM2  | -0.0760 | 1.44E-01 | 2.46E-01 |
| SHROOM3  | -0.0216 | 6.78E-01 | 7.76E-01 |
| SHROOM4  | -0.2250 | 1.22E-05 | 9.97E-05 |
| SIAE     | -0.3060 | 1.76E-09 | 3.96E-08 |
| SIAH1    | -0.0710 | 1.73E-01 | 2.82E-01 |
| SIAH2    | -0.0669 | 1.99E-01 | 3.15E-01 |
| SIAH3    | 0.0571  | 2.72E-01 | 4.00E-01 |
| SIDT1    | -0.1338 | 9.88E-03 | 2.90E-02 |
| SIDT2    | -0.2091 | 4.94E-05 | 3.35E-04 |
| SIGIRR   | -0.0690 | 1.85E-01 | 2.98E-01 |
| SIGLEC10 | 0.0228  | 6.62E-01 | 7.63E-01 |
| SIGLEC11 | -0.1206 | 2.02E-02 | 5.17E-02 |
| SIGLEC12 | 0.0172  | 7.41E-01 | 8.25E-01 |
| SIGLEC14 | -0.0734 | 1.59E-01 | 2.64E-01 |
| SIGLEC15 | -0.0938 | 7.12E-02 | 1.42E-01 |
| SIGLEC16 | -0.0792 | 1.28E-01 | 2.25E-01 |
| SIGLEC1  | -0.1304 | 1.19E-02 | 3.37E-02 |
| SIGLEC5  | -0.0782 | 1.33E-01 | 2.31E-01 |
| SIGLEC6  | -0.0569 | 2.74E-01 | 4.02E-01 |
| SIGLEC7  | -0.1067 | 4.00E-02 | 9.01E-02 |
| SIGLEC8  | -0.1006 | 5.28E-02 | 1.12E-01 |
| SIGLEC9  | -0.0531 | 3.08E-01 | 4.37E-01 |
| SIGLECP3 | -0.0615 | 2.37E-01 | 3.61E-01 |
| SIGMAR1  | -0.0744 | 1.53E-01 | 2.57E-01 |
| SIK1     | -0.1101 | 3.41E-02 | 7.93E-02 |
| SIK2     | -0.0764 | 1.42E-01 | 2.43E-01 |
| SIK3     | 0.0363  | 4.86E-01 | 6.14E-01 |
| SIKE1    | -0.0106 | 8.39E-01 | 8.94E-01 |
| SIL1     | -0.1928 | 1.87E-04 | 1.04E-03 |
| SILV     | -0.1263 | 1.50E-02 | 4.06E-02 |
| SIM1     | -0.0121 | 8.17E-01 | 8.80E-01 |
| SIM2     | 0.1224  | 1.84E-02 | 4.80E-02 |
| SIN3A    | 0.1247  | 1.62E-02 | 4.33E-02 |

|         |         |          |          |
|---------|---------|----------|----------|
| SIN3B   | 0.1525  | 3.23E-03 | 1.15E-02 |
| SIP1    | 0.2728  | 9.38E-08 | 1.37E-06 |
| SIPA1L1 | -0.1770 | 6.17E-04 | 2.84E-03 |
| SIPA1L2 | 0.0662  | 2.03E-01 | 3.20E-01 |
| SIPA1L3 | 0.1826  | 4.07E-04 | 2.01E-03 |
| SIPA1   | -0.0197 | 7.05E-01 | 7.98E-01 |
| SIRPA   | -0.0508 | 3.29E-01 | 4.60E-01 |
| SIRPB1  | -0.0725 | 1.64E-01 | 2.71E-01 |
| SIRPB2  | -0.1352 | 9.13E-03 | 2.72E-02 |
| SIRPD   | -0.0037 | 9.43E-01 | 9.65E-01 |
| SIRPG   | 0.0385  | 4.60E-01 | 5.90E-01 |
| SIRT1   | 0.0361  | 4.88E-01 | 6.15E-01 |
| SIRT2   | -0.1425 | 5.97E-03 | 1.91E-02 |
| SIRT3   | -0.1443 | 5.34E-03 | 1.75E-02 |
| SIRT4   | -0.0040 | 9.38E-01 | 9.62E-01 |
| SIRT5   | -0.1562 | 2.55E-03 | 9.40E-03 |
| SIRT6   | 0.0940  | 7.05E-02 | 1.41E-01 |
| SIRT7   | 0.3004  | 3.56E-09 | 7.40E-08 |
| SIT1    | 0.0175  | 7.36E-01 | 8.22E-01 |
| SIVA1   | 0.0561  | 2.81E-01 | 4.10E-01 |
| SIX1    | 0.0880  | 9.05E-02 | 1.72E-01 |
| SIX2    | 0.1896  | 2.40E-04 | 1.29E-03 |
| SIX3    | 0.1711  | 9.38E-04 | 4.07E-03 |
| SIX4    | 0.1297  | 1.24E-02 | 3.49E-02 |
| SIX5    | 0.2305  | 7.25E-06 | 6.36E-05 |
| SIX6    | 0.0604  | 2.46E-01 | 3.71E-01 |
| SI      | 0.0490  | 3.47E-01 | 4.79E-01 |
| SKA1    | 0.3894  | 7.01E-15 | 4.67E-13 |
| SKA2    | 0.2314  | 6.71E-06 | 5.97E-05 |
| SKA3    | 0.4465  | 1.40E-19 | 3.22E-17 |
| SKAP1   | -0.1085 | 3.67E-02 | 8.43E-02 |
| SKAP2   | 0.0546  | 2.94E-01 | 4.23E-01 |
| SKIL    | 0.0806  | 1.21E-01 | 2.16E-01 |
| SKINTL  | 0.0701  | 1.78E-01 | 2.89E-01 |
| SKIV2L2 | 0.1238  | 1.71E-02 | 4.51E-02 |
| SKIV2L  | 0.1247  | 1.63E-02 | 4.34E-02 |
| SKI     | -0.0304 | 5.59E-01 | 6.78E-01 |
| SKP1    | -0.0141 | 7.87E-01 | 8.58E-01 |
| SKP2    | 0.1703  | 9.94E-04 | 4.28E-03 |
| SLA2    | -0.0566 | 2.77E-01 | 4.05E-01 |
| SLAIN1  | -0.0949 | 6.78E-02 | 1.37E-01 |
| SLAIN2  | -0.1058 | 4.16E-02 | 9.30E-02 |
| SLAMF1  | -0.0789 | 1.29E-01 | 2.26E-01 |
| SLAMF6  | -0.1131 | 2.93E-02 | 7.02E-02 |

|          |         |          |          |
|----------|---------|----------|----------|
| SLAMF7   | -0.0144 | 7.82E-01 | 8.55E-01 |
| SLAMF8   | 0.0091  | 8.62E-01 | 9.11E-01 |
| SLAMF9   | -0.0303 | 5.60E-01 | 6.78E-01 |
| SLA      | -0.1135 | 2.89E-02 | 6.93E-02 |
| SLBP     | 0.3309  | 6.28E-11 | 1.93E-09 |
| SLC10A1  | -0.2367 | 4.03E-06 | 3.86E-05 |
| SLC10A2  | 0.0076  | 8.84E-01 | 9.26E-01 |
| SLC10A3  | 0.2482  | 1.30E-06 | 1.43E-05 |
| SLC10A4  | 0.1754  | 6.92E-04 | 3.14E-03 |
| SLC10A5  | -0.0774 | 1.37E-01 | 2.36E-01 |
| SLC10A6  | -0.2007 | 9.93E-05 | 6.06E-04 |
| SLC10A7  | -0.0867 | 9.56E-02 | 1.80E-01 |
| SLC11A1  | -0.0252 | 6.28E-01 | 7.36E-01 |
| SLC11A2  | -0.0054 | 9.18E-01 | 9.48E-01 |
| SLC12A1  | -0.2309 | 7.02E-06 | 6.19E-05 |
| SLC12A2  | -0.0014 | 9.79E-01 | 9.86E-01 |
| SLC12A3  | 0.0337  | 5.17E-01 | 6.42E-01 |
| SLC12A4  | -0.4007 | 9.66E-16 | 7.92E-14 |
| SLC12A5  | -0.0453 | 3.84E-01 | 5.17E-01 |
| SLC12A6  | -0.0699 | 1.79E-01 | 2.90E-01 |
| SLC12A7  | 0.1084  | 3.69E-02 | 8.46E-02 |
| SLC12A8  | 0.0291  | 5.76E-01 | 6.93E-01 |
| SLC12A9  | 0.0708  | 1.74E-01 | 2.84E-01 |
| SLC13A1  | 0.0393  | 4.51E-01 | 5.82E-01 |
| SLC13A2  | 0.1583  | 2.22E-03 | 8.40E-03 |
| SLC13A3  | -0.1917 | 2.03E-04 | 1.12E-03 |
| SLC13A4  | 0.2014  | 9.34E-05 | 5.75E-04 |
| SLC13A5  | -0.1954 | 1.52E-04 | 8.70E-04 |
| SLC14A1  | -0.1347 | 9.41E-03 | 2.78E-02 |
| SLC14A2  | -0.1554 | 2.69E-03 | 9.85E-03 |
| SLC15A1  | 0.1193  | 2.16E-02 | 5.47E-02 |
| SLC15A2  | 0.1475  | 4.41E-03 | 1.49E-02 |
| SLC15A3  | -0.0969 | 6.23E-02 | 1.28E-01 |
| SLC15A4  | 0.0036  | 9.44E-01 | 9.66E-01 |
| SLC16A10 | -0.0155 | 7.66E-01 | 8.42E-01 |
| SLC16A11 | -0.1603 | 1.96E-03 | 7.55E-03 |
| SLC16A12 | -0.2019 | 8.99E-05 | 5.58E-04 |
| SLC16A13 | -0.1920 | 1.99E-04 | 1.10E-03 |
| SLC16A14 | 0.0063  | 9.04E-01 | 9.39E-01 |
| SLC16A1  | -0.0883 | 8.93E-02 | 1.70E-01 |
| SLC16A2  | -0.2904 | 1.22E-08 | 2.21E-07 |
| SLC16A3  | 0.1672  | 1.23E-03 | 5.12E-03 |
| SLC16A4  | -0.2229 | 1.47E-05 | 1.18E-04 |
| SLC16A5  | -0.1092 | 3.55E-02 | 8.19E-02 |

|            |         |          |          |
|------------|---------|----------|----------|
| SLC16A6    | 0.0122  | 8.15E-01 | 8.79E-01 |
| SLC16A7    | -0.1754 | 6.89E-04 | 3.13E-03 |
| SLC16A8    | 0.1166  | 2.47E-02 | 6.08E-02 |
| SLC16A9    | 0.0884  | 8.91E-02 | 1.70E-01 |
| SLC17A1    | -0.1810 | 4.59E-04 | 2.21E-03 |
| SLC17A2    | -0.1913 | 2.10E-04 | 1.15E-03 |
| SLC17A3    | -0.1380 | 7.76E-03 | 2.37E-02 |
| SLC17A4    | -0.0963 | 6.39E-02 | 1.31E-01 |
| SLC17A5    | 0.1521  | 3.31E-03 | 1.17E-02 |
| SLC17A6    | 0.0681  | 1.91E-01 | 3.05E-01 |
| SLC17A7    | -0.1024 | 4.87E-02 | 1.05E-01 |
| SLC17A8    | 0.0029  | 9.56E-01 | 9.72E-01 |
| SLC17A9    | 0.0752  | 1.48E-01 | 2.52E-01 |
| SLC18A1    | -0.0151 | 7.71E-01 | 8.46E-01 |
| SLC18A2    | -0.1304 | 1.20E-02 | 3.38E-02 |
| SLC18A3    | -0.0051 | 9.22E-01 | 9.50E-01 |
| SLC19A1    | 0.0310  | 5.51E-01 | 6.71E-01 |
| SLC19A2    | 0.0834  | 1.09E-01 | 1.99E-01 |
| SLC19A3    | -0.0910 | 8.01E-02 | 1.56E-01 |
| SLC1A1     | -0.1635 | 1.58E-03 | 6.33E-03 |
| SLC1A2     | -0.2566 | 5.44E-07 | 6.59E-06 |
| SLC1A3     | -0.0193 | 7.11E-01 | 8.03E-01 |
| SLC1A4     | 0.0873  | 9.30E-02 | 1.76E-01 |
| SLC1A5     | 0.2072  | 5.77E-05 | 3.83E-04 |
| SLC1A6     | 0.0454  | 3.84E-01 | 5.17E-01 |
| SLC1A7     | 0.0967  | 6.27E-02 | 1.29E-01 |
| SLC20A1    | 0.1089  | 3.60E-02 | 8.28E-02 |
| SLC20A2    | -0.1603 | 1.95E-03 | 7.54E-03 |
| SLC22A10   | -0.0865 | 9.60E-02 | 1.80E-01 |
| SLC22A11   | -0.0432 | 4.07E-01 | 5.39E-01 |
| SLC22A12   | -0.0923 | 7.58E-02 | 1.49E-01 |
| SLC22A13   | -0.0072 | 8.90E-01 | 9.30E-01 |
| SLC22A14   | 0.0152  | 7.70E-01 | 8.46E-01 |
| SLC22A15   | 0.1380  | 7.77E-03 | 2.37E-02 |
| SLC22A16   | 0.0538  | 3.01E-01 | 4.30E-01 |
| SLC22A17   | -0.0245 | 6.39E-01 | 7.45E-01 |
| SLC22A18AS | -0.1060 | 4.13E-02 | 9.25E-02 |
| SLC22A18   | -0.1544 | 2.86E-03 | 1.04E-02 |
| SLC22A1    | -0.1972 | 1.32E-04 | 7.76E-04 |
| SLC22A20   | 0.2082  | 5.30E-05 | 3.56E-04 |
| SLC22A23   | 0.1184  | 2.25E-02 | 5.65E-02 |
| SLC22A24   | 0.1325  | 1.07E-02 | 3.07E-02 |
| SLC22A25   | -0.1591 | 2.12E-03 | 8.08E-03 |
| SLC22A2    | -0.0289 | 5.79E-01 | 6.96E-01 |



|          |         |          |          |
|----------|---------|----------|----------|
| SLC22A3  | -0.1395 | 7.13E-03 | 2.21E-02 |
| SLC22A4  | -0.0806 | 1.21E-01 | 2.16E-01 |
| SLC22A5  | 0.1194  | 2.14E-02 | 5.42E-02 |
| SLC22A6  | 0.0077  | 8.83E-01 | 9.25E-01 |
| SLC22A7  | -0.1509 | 3.58E-03 | 1.25E-02 |
| SLC22A8  | 0.0614  | 2.38E-01 | 3.62E-01 |
| SLC22A9  | 0.0085  | 8.70E-01 | 9.16E-01 |
| SLC23A1  | 0.0360  | 4.90E-01 | 6.17E-01 |
| SLC23A2  | -0.1586 | 2.18E-03 | 8.28E-03 |
| SLC23A3  | -0.0675 | 1.94E-01 | 3.10E-01 |
| SLC24A1  | -0.1903 | 2.27E-04 | 1.23E-03 |
| SLC24A2  | 0.0849  | 1.03E-01 | 1.89E-01 |
| SLC24A3  | -0.0922 | 7.63E-02 | 1.50E-01 |
| SLC24A4  | -0.1312 | 1.14E-02 | 3.25E-02 |
| SLC24A5  | 0.1633  | 1.60E-03 | 6.38E-03 |
| SLC24A6  | -0.0245 | 6.38E-01 | 7.44E-01 |
| SLC25A10 | -0.1388 | 7.41E-03 | 2.28E-02 |
| SLC25A11 | -0.2300 | 7.61E-06 | 6.61E-05 |
| SLC25A12 | 0.0340  | 5.14E-01 | 6.38E-01 |
| SLC25A13 | -0.3035 | 2.40E-09 | 5.19E-08 |
| SLC25A14 | 0.2757  | 6.75E-08 | 1.02E-06 |
| SLC25A15 | -0.2022 | 8.81E-05 | 5.48E-04 |
| SLC25A16 | -0.0330 | 5.26E-01 | 6.49E-01 |
| SLC25A17 | 0.0178  | 7.32E-01 | 8.19E-01 |
| SLC25A18 | -0.1007 | 5.27E-02 | 1.12E-01 |
| SLC25A19 | 0.2724  | 9.86E-08 | 1.43E-06 |
| SLC25A1  | -0.0861 | 9.77E-02 | 1.83E-01 |
| SLC25A20 | -0.2401 | 2.89E-06 | 2.86E-05 |
| SLC25A21 | 0.0307  | 5.56E-01 | 6.75E-01 |
| SLC25A22 | -0.0309 | 5.54E-01 | 6.73E-01 |
| SLC25A23 | -0.2240 | 1.32E-05 | 1.07E-04 |
| SLC25A24 | 0.0557  | 2.85E-01 | 4.13E-01 |
| SLC25A25 | -0.1008 | 5.23E-02 | 1.11E-01 |
| SLC25A26 | -0.1426 | 5.94E-03 | 1.90E-02 |
| SLC25A27 | -0.0193 | 7.10E-01 | 8.02E-01 |
| SLC25A28 | -0.0430 | 4.08E-01 | 5.41E-01 |
| SLC25A29 | 0.0775  | 1.36E-01 | 2.36E-01 |
| SLC25A2  | 0.0054  | 9.18E-01 | 9.48E-01 |
| SLC25A30 | -0.0809 | 1.20E-01 | 2.14E-01 |
| SLC25A31 | 0.0455  | 3.82E-01 | 5.16E-01 |
| SLC25A32 | -0.0625 | 2.30E-01 | 3.53E-01 |
| SLC25A33 | -0.0161 | 7.57E-01 | 8.37E-01 |
| SLC25A34 | -0.1488 | 4.06E-03 | 1.39E-02 |
| SLC25A35 | 0.1934  | 1.79E-04 | 1.00E-03 |

|          |         |          |          |
|----------|---------|----------|----------|
| SLC25A36 | 0.0323  | 5.36E-01 | 6.58E-01 |
| SLC25A37 | 0.0321  | 5.38E-01 | 6.60E-01 |
| SLC25A38 | -0.1839 | 3.69E-04 | 1.85E-03 |
| SLC25A39 | 0.1359  | 8.78E-03 | 2.63E-02 |
| SLC25A3  | -0.1747 | 7.28E-04 | 3.28E-03 |
| SLC25A40 | 0.0053  | 9.19E-01 | 9.49E-01 |
| SLC25A41 | -0.0044 | 9.32E-01 | 9.58E-01 |
| SLC25A42 | -0.2778 | 5.31E-08 | 8.21E-07 |
| SLC25A43 | 0.0744  | 1.53E-01 | 2.57E-01 |
| SLC25A44 | 0.1269  | 1.44E-02 | 3.95E-02 |
| SLC25A45 | 0.1200  | 2.08E-02 | 5.30E-02 |
| SLC25A46 | -0.2381 | 3.53E-06 | 3.43E-05 |
| SLC25A4  | -0.3545 | 2.00E-12 | 8.34E-11 |
| SLC25A5  | -0.0120 | 8.17E-01 | 8.80E-01 |
| SLC25A6  | 0.0891  | 8.65E-02 | 1.66E-01 |
| SLC26A10 | 0.1228  | 1.80E-02 | 4.72E-02 |
| SLC26A11 | 0.2978  | 4.91E-09 | 9.84E-08 |
| SLC26A1  | -0.2598 | 3.89E-07 | 4.90E-06 |
| SLC26A2  | 0.1578  | 2.30E-03 | 8.66E-03 |
| SLC26A3  | -0.0687 | 1.87E-01 | 3.00E-01 |
| SLC26A4  | -0.0137 | 7.92E-01 | 8.62E-01 |
| SLC26A5  | -0.0349 | 5.03E-01 | 6.28E-01 |
| SLC26A6  | 0.2355  | 4.53E-06 | 4.28E-05 |
| SLC26A7  | 0.0234  | 6.54E-01 | 7.56E-01 |
| SLC26A8  | -0.0987 | 5.76E-02 | 1.20E-01 |
| SLC26A9  | 0.1789  | 5.36E-04 | 2.52E-03 |
| SLC27A1  | -0.0729 | 1.61E-01 | 2.68E-01 |
| SLC27A2  | -0.2522 | 8.61E-07 | 9.92E-06 |
| SLC27A3  | 0.1738  | 7.75E-04 | 3.46E-03 |
| SLC27A4  | -0.2011 | 9.63E-05 | 5.91E-04 |
| SLC27A5  | -0.3483 | 5.11E-12 | 1.98E-10 |
| SLC27A6  | 0.0709  | 1.73E-01 | 2.83E-01 |
| SLC28A1  | -0.2416 | 2.50E-06 | 2.53E-05 |
| SLC28A2  | 0.0087  | 8.67E-01 | 9.14E-01 |
| SLC28A3  | 0.0181  | 7.28E-01 | 8.15E-01 |
| SLC29A1  | 0.1440  | 5.44E-03 | 1.77E-02 |
| SLC29A2  | 0.1127  | 3.00E-02 | 7.15E-02 |
| SLC29A3  | -0.0350 | 5.02E-01 | 6.27E-01 |
| SLC29A4  | 0.0517  | 3.21E-01 | 4.51E-01 |
| SLC2A10  | -0.1926 | 1.90E-04 | 1.05E-03 |
| SLC2A11  | 0.0041  | 9.38E-01 | 9.61E-01 |
| SLC2A12  | -0.0797 | 1.25E-01 | 2.21E-01 |
| SLC2A13  | 0.0360  | 4.90E-01 | 6.17E-01 |
| SLC2A14  | -0.0594 | 2.54E-01 | 3.79E-01 |

|          |         |          |          |
|----------|---------|----------|----------|
| SLC2A1   | 0.1241  | 1.68E-02 | 4.45E-02 |
| SLC2A2   | -0.1640 | 1.53E-03 | 6.13E-03 |
| SLC2A3   | -0.1280 | 1.36E-02 | 3.76E-02 |
| SLC2A4RG | -0.0095 | 8.55E-01 | 9.06E-01 |
| SLC2A4   | -0.1649 | 1.44E-03 | 5.83E-03 |
| SLC2A5   | 0.0011  | 9.84E-01 | 9.90E-01 |
| SLC2A6   | 0.1796  | 5.10E-04 | 2.42E-03 |
| SLC2A7   | 0.0863  | 9.70E-02 | 1.82E-01 |
| SLC2A8   | 0.0658  | 2.06E-01 | 3.24E-01 |
| SLC2A9   | -0.1469 | 4.58E-03 | 1.53E-02 |
| SLC30A10 | -0.0340 | 5.14E-01 | 6.39E-01 |
| SLC30A1  | -0.1501 | 3.77E-03 | 1.31E-02 |
| SLC30A2  | -0.0294 | 5.73E-01 | 6.90E-01 |
| SLC30A3  | 0.1280  | 1.36E-02 | 3.76E-02 |
| SLC30A4  | -0.1795 | 5.12E-04 | 2.43E-03 |
| SLC30A5  | 0.0585  | 2.61E-01 | 3.87E-01 |
| SLC30A6  | 0.0066  | 9.00E-01 | 9.37E-01 |
| SLC30A7  | 0.0293  | 5.74E-01 | 6.91E-01 |
| SLC30A8  | 0.1171  | 2.41E-02 | 5.97E-02 |
| SLC30A9  | -0.0727 | 1.62E-01 | 2.69E-01 |
| SLC31A1  | -0.2368 | 4.01E-06 | 3.84E-05 |
| SLC31A2  | -0.1657 | 1.36E-03 | 5.56E-03 |
| SLC32A1  | -0.0564 | 2.79E-01 | 4.07E-01 |
| SLC33A1  | -0.0316 | 5.44E-01 | 6.65E-01 |
| SLC34A1  | -0.0907 | 8.09E-02 | 1.57E-01 |
| SLC34A2  | 0.0641  | 2.18E-01 | 3.38E-01 |
| SLC34A3  | 0.1719  | 8.87E-04 | 3.88E-03 |
| SLC35A1  | 0.1156  | 2.59E-02 | 6.35E-02 |
| SLC35A2  | 0.0235  | 6.52E-01 | 7.56E-01 |
| SLC35A3  | -0.1230 | 1.78E-02 | 4.66E-02 |
| SLC35A4  | 0.0559  | 2.83E-01 | 4.12E-01 |
| SLC35A5  | -0.1567 | 2.47E-03 | 9.18E-03 |
| SLC35B1  | 0.0708  | 1.74E-01 | 2.84E-01 |
| SLC35B2  | 0.0572  | 2.72E-01 | 4.00E-01 |
| SLC35B3  | 0.0184  | 7.24E-01 | 8.13E-01 |
| SLC35B4  | -0.0539 | 3.00E-01 | 4.30E-01 |
| SLC35C1  | -0.1798 | 5.01E-04 | 2.38E-03 |
| SLC35C2  | -0.0945 | 6.91E-02 | 1.39E-01 |
| SLC35D1  | -0.2349 | 4.78E-06 | 4.46E-05 |
| SLC35D2  | 0.0837  | 1.08E-01 | 1.97E-01 |
| SLC35D3  | 0.0430  | 4.09E-01 | 5.42E-01 |
| SLC35E1  | -0.0357 | 4.92E-01 | 6.19E-01 |
| SLC35E2  | 0.0127  | 8.08E-01 | 8.74E-01 |
| SLC35E3  | 0.0684  | 1.88E-01 | 3.02E-01 |

|          |         |          |          |
|----------|---------|----------|----------|
| SLC35E4  | 0.2296  | 7.93E-06 | 6.85E-05 |
| SLC35F1  | 0.0032  | 9.52E-01 | 9.70E-01 |
| SLC35F2  | 0.1365  | 8.48E-03 | 2.55E-02 |
| SLC35F3  | 0.0966  | 6.30E-02 | 1.29E-01 |
| SLC35F4  | -0.0054 | 9.17E-01 | 9.48E-01 |
| SLC35F5  | -0.0805 | 1.22E-01 | 2.16E-01 |
| SLC36A1  | 0.2000  | 1.05E-04 | 6.34E-04 |
| SLC36A2  | 0.1742  | 7.52E-04 | 3.37E-03 |
| SLC36A3  | 0.0563  | 2.80E-01 | 4.08E-01 |
| SLC36A4  | 0.1608  | 1.89E-03 | 7.35E-03 |
| SLC37A1  | 0.1917  | 2.04E-04 | 1.12E-03 |
| SLC37A2  | -0.0359 | 4.91E-01 | 6.18E-01 |
| SLC37A3  | 0.0616  | 2.36E-01 | 3.60E-01 |
| SLC37A4  | -0.2404 | 2.83E-06 | 2.82E-05 |
| SLC38A10 | 0.1079  | 3.78E-02 | 8.62E-02 |
| SLC38A11 | -0.1003 | 5.35E-02 | 1.13E-01 |
| SLC38A1  | 0.0852  | 1.01E-01 | 1.87E-01 |
| SLC38A2  | -0.2767 | 6.01E-08 | 9.19E-07 |
| SLC38A3  | -0.1123 | 3.05E-02 | 7.24E-02 |
| SLC38A4  | -0.1301 | 1.21E-02 | 3.42E-02 |
| SLC38A5  | -0.0137 | 7.93E-01 | 8.63E-01 |
| SLC38A6  | 0.1257  | 1.54E-02 | 4.15E-02 |
| SLC38A7  | -0.1175 | 2.37E-02 | 5.89E-02 |
| SLC38A8  | -0.1208 | 2.00E-02 | 5.13E-02 |
| SLC38A9  | 0.0784  | 1.32E-01 | 2.29E-01 |
| SLC39A10 | 0.1712  | 9.29E-04 | 4.04E-03 |
| SLC39A11 | -0.1929 | 1.86E-04 | 1.04E-03 |
| SLC39A12 | -0.0950 | 6.75E-02 | 1.36E-01 |
| SLC39A13 | 0.1140  | 2.81E-02 | 6.78E-02 |
| SLC39A14 | -0.2188 | 2.12E-05 | 1.63E-04 |
| SLC39A1  | 0.4096  | 1.94E-16 | 1.84E-14 |
| SLC39A2  | -0.1283 | 1.34E-02 | 3.71E-02 |
| SLC39A3  | 0.0059  | 9.09E-01 | 9.43E-01 |
| SLC39A4  | 0.1152  | 2.65E-02 | 6.47E-02 |
| SLC39A5  | -0.0954 | 6.63E-02 | 1.34E-01 |
| SLC39A6  | 0.0867  | 9.56E-02 | 1.80E-01 |
| SLC39A7  | -0.0098 | 8.51E-01 | 9.03E-01 |
| SLC39A8  | -0.2301 | 7.55E-06 | 6.57E-05 |
| SLC39A9  | -0.2184 | 2.19E-05 | 1.67E-04 |
| SLC3A1   | -0.0834 | 1.09E-01 | 1.98E-01 |
| SLC3A2   | -0.1228 | 1.80E-02 | 4.71E-02 |
| SLC40A1  | -0.1734 | 7.99E-04 | 3.55E-03 |
| SLC41A1  | 0.2477  | 1.36E-06 | 1.48E-05 |
| SLC41A2  | -0.2415 | 2.52E-06 | 2.55E-05 |

|          |         |          |          |
|----------|---------|----------|----------|
| SLC41A3  | 0.1568  | 2.46E-03 | 9.15E-03 |
| SLC43A1  | -0.1340 | 9.76E-03 | 2.87E-02 |
| SLC43A2  | 0.0198  | 7.04E-01 | 7.97E-01 |
| SLC43A3  | 0.0361  | 4.88E-01 | 6.15E-01 |
| SLC44A1  | 0.1734  | 7.97E-04 | 3.54E-03 |
| SLC44A2  | 0.0055  | 9.15E-01 | 9.47E-01 |
| SLC44A3  | 0.1711  | 9.35E-04 | 4.06E-03 |
| SLC44A4  | 0.1203  | 2.04E-02 | 5.22E-02 |
| SLC44A5  | 0.0361  | 4.88E-01 | 6.16E-01 |
| SLC45A1  | -0.1409 | 6.55E-03 | 2.06E-02 |
| SLC45A2  | -0.1977 | 1.27E-04 | 7.46E-04 |
| SLC45A3  | -0.0102 | 8.45E-01 | 8.99E-01 |
| SLC45A4  | 0.1818  | 4.31E-04 | 2.10E-03 |
| SLC46A1  | 0.0334  | 5.22E-01 | 6.46E-01 |
| SLC46A2  | 0.0975  | 6.07E-02 | 1.25E-01 |
| SLC46A3  | -0.2105 | 4.38E-05 | 3.03E-04 |
| SLC47A1  | -0.1383 | 7.65E-03 | 2.34E-02 |
| SLC47A2  | 0.0276  | 5.97E-01 | 7.10E-01 |
| SLC48A1  | -0.0031 | 9.52E-01 | 9.70E-01 |
| SLC4A10  | -0.1060 | 4.12E-02 | 9.24E-02 |
| SLC4A11  | 0.0884  | 8.92E-02 | 1.70E-01 |
| SLC4A1AP | 0.1469  | 4.58E-03 | 1.53E-02 |
| SLC4A1   | -0.1474 | 4.45E-03 | 1.50E-02 |
| SLC4A2   | -0.0210 | 6.86E-01 | 7.83E-01 |
| SLC4A3   | 0.1217  | 1.91E-02 | 4.94E-02 |
| SLC4A4   | -0.2588 | 4.30E-07 | 5.36E-06 |
| SLC4A5   | 0.1489  | 4.04E-03 | 1.39E-02 |
| SLC4A7   | 0.0307  | 5.56E-01 | 6.75E-01 |
| SLC4A8   | 0.0319  | 5.41E-01 | 6.62E-01 |
| SLC4A9   | 0.0693  | 1.83E-01 | 2.95E-01 |
| SLC5A10  | -0.0122 | 8.15E-01 | 8.78E-01 |
| SLC5A11  | 0.0735  | 1.58E-01 | 2.64E-01 |
| SLC5A12  | -0.0744 | 1.52E-01 | 2.57E-01 |
| SLC5A1   | 0.0801  | 1.24E-01 | 2.19E-01 |
| SLC5A2   | -0.0425 | 4.14E-01 | 5.47E-01 |
| SLC5A3   | 0.0080  | 8.78E-01 | 9.21E-01 |
| SLC5A4   | -0.2081 | 5.37E-05 | 3.60E-04 |
| SLC5A5   | 0.0907  | 8.11E-02 | 1.57E-01 |
| SLC5A6   | -0.0825 | 1.12E-01 | 2.04E-01 |
| SLC5A7   | 0.0453  | 3.84E-01 | 5.17E-01 |
| SLC5A8   | 0.0327  | 5.30E-01 | 6.53E-01 |
| SLC5A9   | 0.0177  | 7.34E-01 | 8.20E-01 |
| SLC6A10P | 0.1222  | 1.86E-02 | 4.84E-02 |
| SLC6A11  | 0.1008  | 5.23E-02 | 1.11E-01 |

|          |         |          |          |
|----------|---------|----------|----------|
| SLC6A12  | -0.2956 | 6.41E-09 | 1.25E-07 |
| SLC6A13  | -0.2636 | 2.59E-07 | 3.43E-06 |
| SLC6A14  | 0.2298  | 7.74E-06 | 6.71E-05 |
| SLC6A15  | 0.1639  | 1.54E-03 | 6.17E-03 |
| SLC6A16  | -0.0946 | 6.86E-02 | 1.38E-01 |
| SLC6A17  | -0.0384 | 4.61E-01 | 5.92E-01 |
| SLC6A18  | 0.1095  | 3.50E-02 | 8.10E-02 |
| SLC6A19  | 0.1564  | 2.52E-03 | 9.32E-03 |
| SLC6A1   | -0.1230 | 1.78E-02 | 4.67E-02 |
| SLC6A20  | -0.0392 | 4.51E-01 | 5.82E-01 |
| SLC6A2   | -0.0420 | 4.20E-01 | 5.53E-01 |
| SLC6A3   | 0.0202  | 6.99E-01 | 7.92E-01 |
| SLC6A4   | 0.0497  | 3.40E-01 | 4.72E-01 |
| SLC6A5   | 0.0414  | 4.26E-01 | 5.59E-01 |
| SLC6A6   | 0.0220  | 6.73E-01 | 7.72E-01 |
| SLC6A7   | -0.0721 | 1.66E-01 | 2.74E-01 |
| SLC6A8   | 0.1077  | 3.82E-02 | 8.69E-02 |
| SLC6A9   | -0.0030 | 9.55E-01 | 9.72E-01 |
| SLC7A10  | 0.2016  | 9.23E-05 | 5.69E-04 |
| SLC7A11  | 0.0650  | 2.12E-01 | 3.31E-01 |
| SLC7A13  | 0.0112  | 8.30E-01 | 8.89E-01 |
| SLC7A14  | -0.0273 | 6.00E-01 | 7.13E-01 |
| SLC7A1   | 0.1969  | 1.35E-04 | 7.91E-04 |
| SLC7A2   | -0.1240 | 1.69E-02 | 4.47E-02 |
| SLC7A3   | 0.0170  | 7.45E-01 | 8.28E-01 |
| SLC7A4   | -0.0734 | 1.58E-01 | 2.64E-01 |
| SLC7A5P1 | 0.0553  | 2.88E-01 | 4.17E-01 |
| SLC7A5P2 | 0.1862  | 3.11E-04 | 1.61E-03 |
| SLC7A5   | 0.0871  | 9.39E-02 | 1.77E-01 |
| SLC7A6OS | -0.0209 | 6.88E-01 | 7.84E-01 |
| SLC7A6   | 0.0572  | 2.71E-01 | 3.99E-01 |
| SLC7A7   | 0.0457  | 3.80E-01 | 5.14E-01 |
| SLC7A8   | -0.0894 | 8.57E-02 | 1.64E-01 |
| SLC7A9   | -0.0114 | 8.27E-01 | 8.87E-01 |
| SLC8A1   | -0.1596 | 2.04E-03 | 7.85E-03 |
| SLC8A2   | 0.1034  | 4.65E-02 | 1.02E-01 |
| SLC8A3   | -0.2462 | 1.58E-06 | 1.70E-05 |
| SLC9A10  | 0.1790  | 5.31E-04 | 2.50E-03 |
| SLC9A11  | 0.0094  | 8.56E-01 | 9.07E-01 |
| SLC9A1   | 0.0038  | 9.42E-01 | 9.64E-01 |
| SLC9A2   | 0.0800  | 1.24E-01 | 2.19E-01 |
| SLC9A3R1 | 0.0622  | 2.32E-01 | 3.55E-01 |
| SLC9A3R2 | -0.1691 | 1.07E-03 | 4.56E-03 |
| SLC9A3   | 0.1021  | 4.94E-02 | 1.07E-01 |

|         |         |          |          |
|---------|---------|----------|----------|
| SLC9A4  | 0.1153  | 2.64E-02 | 6.44E-02 |
| SLC9A5  | 0.0440  | 3.98E-01 | 5.31E-01 |
| SLC9A6  | 0.1497  | 3.85E-03 | 1.33E-02 |
| SLC9A7  | 0.0388  | 4.56E-01 | 5.87E-01 |
| SLC9A8  | 0.0808  | 1.20E-01 | 2.15E-01 |
| SLC9A9  | -0.0375 | 4.71E-01 | 6.00E-01 |
| SLCO1A2 | -0.0988 | 5.73E-02 | 1.20E-01 |
| SLCO1B1 | -0.2465 | 1.54E-06 | 1.66E-05 |
| SLCO1B3 | -0.1178 | 2.32E-02 | 5.80E-02 |
| SLCO1C1 | -0.1416 | 6.30E-03 | 1.99E-02 |
| SLCO2A1 | -0.3087 | 1.24E-09 | 2.87E-08 |
| SLCO2B1 | -0.2514 | 9.31E-07 | 1.07E-05 |
| SLCO3A1 | 0.0716  | 1.69E-01 | 2.78E-01 |
| SLCO4A1 | -0.0182 | 7.27E-01 | 8.15E-01 |
| SLCO4C1 | 0.0715  | 1.69E-01 | 2.78E-01 |
| SLCO5A1 | 0.0753  | 1.48E-01 | 2.51E-01 |
| SLCO6A1 | 0.1011  | 5.18E-02 | 1.11E-01 |
| SLED1   | -0.0386 | 4.58E-01 | 5.89E-01 |
| SLFN11  | -0.0206 | 6.93E-01 | 7.88E-01 |
| SLFN12L | -0.1037 | 4.58E-02 | 1.00E-01 |
| SLFN12  | -0.0436 | 4.02E-01 | 5.35E-01 |
| SLFN13  | 0.1628  | 1.65E-03 | 6.57E-03 |
| SLFN14  | 0.0181  | 7.28E-01 | 8.15E-01 |
| SLFN5   | -0.1790 | 5.32E-04 | 2.51E-03 |
| SLFNL1  | 0.1074  | 3.86E-02 | 8.77E-02 |
| SLIT1   | 0.0464  | 3.73E-01 | 5.06E-01 |
| SLIT2   | -0.1155 | 2.61E-02 | 6.39E-02 |
| SLIT3   | -0.1777 | 5.84E-04 | 2.71E-03 |
| SLITRK1 | 0.2073  | 5.73E-05 | 3.81E-04 |
| SLITRK2 | 0.0104  | 8.42E-01 | 8.96E-01 |
| SLITRK3 | -0.0953 | 6.68E-02 | 1.35E-01 |
| SLITRK4 | -0.0562 | 2.81E-01 | 4.09E-01 |
| SLITRK5 | 0.1047  | 4.39E-02 | 9.70E-02 |
| SLITRK6 | -0.0761 | 1.43E-01 | 2.45E-01 |
| SLK     | -0.0962 | 6.41E-02 | 1.31E-01 |
| SLMAP   | 0.0279  | 5.93E-01 | 7.07E-01 |
| SLMO1   | 0.1682  | 1.15E-03 | 4.83E-03 |
| SLMO2   | 0.1909  | 2.16E-04 | 1.18E-03 |
| SLN     | 0.0012  | 9.81E-01 | 9.88E-01 |
| SLPI    | 0.0578  | 2.67E-01 | 3.95E-01 |
| SLTM    | 0.0858  | 9.89E-02 | 1.84E-01 |
| SLU7    | 0.0587  | 2.59E-01 | 3.85E-01 |
| SLURP1  | -0.0234 | 6.53E-01 | 7.56E-01 |
| SMAD1   | -0.2482 | 1.29E-06 | 1.42E-05 |

|          |         |          |          |
|----------|---------|----------|----------|
| SMAD2    | 0.0762  | 1.43E-01 | 2.45E-01 |
| SMAD3    | 0.1738  | 7.75E-04 | 3.46E-03 |
| SMAD4    | 0.0347  | 5.05E-01 | 6.30E-01 |
| SMAD5OS  | 0.0462  | 3.75E-01 | 5.09E-01 |
| SMAD5    | 0.1535  | 3.03E-03 | 1.09E-02 |
| SMAD6    | -0.2035 | 7.89E-05 | 4.98E-04 |
| SMAD7    | -0.0182 | 7.27E-01 | 8.14E-01 |
| SMAD9    | -0.1464 | 4.73E-03 | 1.57E-02 |
| SMAGP    | 0.0978  | 5.98E-02 | 1.24E-01 |
| SMAP1    | 0.2573  | 5.05E-07 | 6.17E-06 |
| SMAP2    | -0.1028 | 4.79E-02 | 1.04E-01 |
| SMARCA1  | 0.0703  | 1.77E-01 | 2.88E-01 |
| SMARCA2  | -0.1942 | 1.68E-04 | 9.48E-04 |
| SMARCA4  | 0.2240  | 1.33E-05 | 1.07E-04 |
| SMARCA5  | 0.0246  | 6.37E-01 | 7.43E-01 |
| SMARCAD1 | -0.0290 | 5.77E-01 | 6.94E-01 |
| SMARCAL1 | 0.1476  | 4.39E-03 | 1.48E-02 |
| SMARCB1  | 0.1661  | 1.32E-03 | 5.44E-03 |
| SMARCC1  | 0.2013  | 9.44E-05 | 5.80E-04 |
| SMARCC2  | 0.2355  | 4.52E-06 | 4.26E-05 |
| SMARCD1  | 0.2493  | 1.16E-06 | 1.30E-05 |
| SMARCD2  | 0.1039  | 4.54E-02 | 9.97E-02 |
| SMARCD3  | 0.0603  | 2.47E-01 | 3.72E-01 |
| SMARCE1  | 0.3307  | 6.42E-11 | 1.97E-09 |
| SMC1A    | 0.1198  | 2.10E-02 | 5.34E-02 |
| SMC1B    | 0.3125  | 7.54E-10 | 1.84E-08 |
| SMC2     | 0.2925  | 9.41E-09 | 1.76E-07 |
| SMC3     | 0.1652  | 1.40E-03 | 5.71E-03 |
| SMC4     | 0.3314  | 5.88E-11 | 1.82E-09 |
| SMC5     | 0.2566  | 5.45E-07 | 6.59E-06 |
| SMC6     | 0.1340  | 9.76E-03 | 2.87E-02 |
| SMCHD1   | 0.1990  | 1.14E-04 | 6.82E-04 |
| SMCP     | 0.0992  | 5.63E-02 | 1.18E-01 |
| SMCR5    | 0.1020  | 4.96E-02 | 1.07E-01 |
| SMCR7L   | 0.0557  | 2.85E-01 | 4.14E-01 |
| SMCR7    | 0.0156  | 7.65E-01 | 8.41E-01 |
| SMCR8    | 0.1181  | 2.29E-02 | 5.74E-02 |
| SMEK1    | 0.0861  | 9.76E-02 | 1.83E-01 |
| SMEK2    | 0.0240  | 6.45E-01 | 7.50E-01 |
| SMEK3P   | 0.0593  | 2.55E-01 | 3.80E-01 |
| SMG1     | 0.0541  | 2.98E-01 | 4.28E-01 |
| SMG5     | 0.3906  | 5.67E-15 | 3.87E-13 |
| SMG6     | -0.1624 | 1.70E-03 | 6.71E-03 |
| SMG7     | 0.4131  | 1.01E-16 | 1.03E-14 |



|         |         |          |          |
|---------|---------|----------|----------|
| SMN1    | 0.1365  | 8.47E-03 | 2.55E-02 |
| SMN2    | 0.1650  | 1.43E-03 | 5.79E-03 |
| SMNDC1  | 0.0662  | 2.03E-01 | 3.20E-01 |
| SMOC1   | -0.1917 | 2.03E-04 | 1.12E-03 |
| SMOC2   | -0.1585 | 2.20E-03 | 8.34E-03 |
| SMOX    | 0.0534  | 3.05E-01 | 4.34E-01 |
| SMO     | 0.0222  | 6.70E-01 | 7.70E-01 |
| SMPD1   | -0.2913 | 1.09E-08 | 2.01E-07 |
| SMPD2   | 0.2623  | 2.97E-07 | 3.88E-06 |
| SMPD3   | -0.0972 | 6.16E-02 | 1.27E-01 |
| SMPD4   | 0.3654  | 3.69E-13 | 1.78E-11 |
| SMPDL3A | -0.0763 | 1.42E-01 | 2.44E-01 |
| SMPDL3B | 0.1670  | 1.25E-03 | 5.18E-03 |
| SMPX    | -0.1059 | 4.15E-02 | 9.28E-02 |
| SMR3A   | -0.0630 | 2.26E-01 | 3.47E-01 |
| SMR3B   | -0.0579 | 2.66E-01 | 3.93E-01 |
| SMS     | 0.1127  | 3.00E-02 | 7.14E-02 |
| SMTNL1  | -0.0282 | 5.88E-01 | 7.03E-01 |
| SMTNL2  | -0.0286 | 5.83E-01 | 6.99E-01 |
| SMTN    | 0.1136  | 2.87E-02 | 6.91E-02 |
| SMU1    | 0.1943  | 1.66E-04 | 9.41E-04 |
| SMUG1   | 0.1789  | 5.37E-04 | 2.53E-03 |
| SMURF1  | 0.0053  | 9.18E-01 | 9.48E-01 |
| SMURF2  | 0.2687  | 1.48E-07 | 2.07E-06 |
| SMYD1   | -0.0384 | 4.61E-01 | 5.92E-01 |
| SMYD2   | 0.0315  | 5.45E-01 | 6.66E-01 |
| SMYD3   | 0.3060  | 1.76E-09 | 3.96E-08 |
| SMYD4   | 0.0606  | 2.44E-01 | 3.69E-01 |
| SMYD5   | 0.2088  | 5.06E-05 | 3.42E-04 |
| SNAI1   | -0.1108 | 3.28E-02 | 7.70E-02 |
| SNAI2   | -0.1273 | 1.41E-02 | 3.88E-02 |
| SNAI3   | -0.0086 | 8.69E-01 | 9.16E-01 |
| SNAP23  | -0.1707 | 9.64E-04 | 4.17E-03 |
| SNAP25  | 0.1336  | 9.98E-03 | 2.92E-02 |
| SNAP29  | 0.0266  | 6.09E-01 | 7.21E-01 |
| SNAP47  | 0.1731  | 8.15E-04 | 3.60E-03 |
| SNAP91  | 0.0620  | 2.34E-01 | 3.57E-01 |
| SNAPC1  | 0.0948  | 6.81E-02 | 1.37E-01 |
| SNAPC2  | -0.0386 | 4.58E-01 | 5.89E-01 |
| SNAPC3  | -0.0658 | 2.06E-01 | 3.24E-01 |
| SNAPC4  | 0.2112  | 4.11E-05 | 2.87E-04 |
| SNAPC5  | -0.0108 | 8.36E-01 | 8.93E-01 |
| SNAPIN  | 0.5138  | 2.19E-26 | 1.41E-23 |
| SNAR-B2 | 0.0127  | 8.07E-01 | 8.73E-01 |

|            |         |          |          |
|------------|---------|----------|----------|
| SNAR-C4    | 0.0433  | 4.06E-01 | 5.39E-01 |
| SNAR-G1    | 0.0378  | 4.68E-01 | 5.98E-01 |
| SNCAIP     | -0.0892 | 8.64E-02 | 1.65E-01 |
| SNCA       | -0.1283 | 1.34E-02 | 3.72E-02 |
| SNCB       | 0.0143  | 7.83E-01 | 8.56E-01 |
| SNCG       | 0.0939  | 7.10E-02 | 1.42E-01 |
| SND1       | -0.1237 | 1.71E-02 | 4.53E-02 |
| SNED1      | -0.1296 | 1.25E-02 | 3.50E-02 |
| SNF8       | 0.1619  | 1.75E-03 | 6.89E-03 |
| SNHG10     | 0.2597  | 3.92E-07 | 4.93E-06 |
| SNHG11     | 0.1017  | 5.04E-02 | 1.08E-01 |
| SNHG12     | 0.2952  | 6.77E-09 | 1.31E-07 |
| SNHG1      | 0.3750  | 7.84E-14 | 4.23E-12 |
| SNHG3-RCC1 | 0.0652  | 2.10E-01 | 3.29E-01 |
| SNHG3      | 0.2340  | 5.21E-06 | 4.82E-05 |
| SNHG4      | 0.2470  | 1.47E-06 | 1.59E-05 |
| SNHG5      | 0.0653  | 2.10E-01 | 3.28E-01 |
| SNHG6      | 0.1419  | 6.19E-03 | 1.96E-02 |
| SNHG7      | 0.2326  | 6.00E-06 | 5.41E-05 |
| SNHG8      | -0.0509 | 3.28E-01 | 4.59E-01 |
| SNHG9      | 0.0347  | 5.05E-01 | 6.30E-01 |
| SNIP1      | 0.0434  | 4.04E-01 | 5.37E-01 |
| SNN        | -0.0105 | 8.40E-01 | 8.95E-01 |
| SNORA10    | 0.1444  | 5.32E-03 | 1.74E-02 |
| SNORA11B   | 0.1010  | 5.19E-02 | 1.11E-01 |
| SNORA11    | 0.0795  | 1.26E-01 | 2.22E-01 |
| SNORA12    | 0.1363  | 8.55E-03 | 2.57E-02 |
| SNORA13    | 0.0220  | 6.73E-01 | 7.72E-01 |
| SNORA14A   | -0.0067 | 8.97E-01 | 9.34E-01 |
| SNORA14B   | -0.0073 | 8.88E-01 | 9.28E-01 |
| SNORA15    | 0.0304  | 5.59E-01 | 6.77E-01 |
| SNORA16A   | -0.0306 | 5.56E-01 | 6.75E-01 |
| SNORA16B   | 0.0459  | 3.78E-01 | 5.11E-01 |
| SNORA18    | -0.0277 | 5.95E-01 | 7.09E-01 |
| SNORA1     | 0.0445  | 3.93E-01 | 5.26E-01 |
| SNORA20    | 0.0224  | 6.67E-01 | 7.67E-01 |
| SNORA21    | 0.1179  | 2.31E-02 | 5.78E-02 |
| SNORA22    | -0.0094 | 8.57E-01 | 9.08E-01 |
| SNORA23    | 0.0383  | 4.62E-01 | 5.92E-01 |
| SNORA24    | 0.0412  | 4.29E-01 | 5.61E-01 |
| SNORA25    | 0.0970  | 6.21E-02 | 1.27E-01 |
| SNORA26    | 0.0770  | 1.39E-01 | 2.39E-01 |
| SNORA27    | 0.0944  | 6.94E-02 | 1.39E-01 |
| SNORA28    | 0.0456  | 3.81E-01 | 5.14E-01 |

|          |         |          |          |
|----------|---------|----------|----------|
| SNORA29  | 0.1036  | 4.62E-02 | 1.01E-01 |
| SNORA2A  | 0.0375  | 4.72E-01 | 6.01E-01 |
| SNORA2B  | -0.0311 | 5.51E-01 | 6.71E-01 |
| SNORA31  | 0.0848  | 1.03E-01 | 1.90E-01 |
| SNORA32  | 0.0975  | 6.06E-02 | 1.25E-01 |
| SNORA34  | 0.0745  | 1.52E-01 | 2.56E-01 |
| SNORA36A | -0.0260 | 6.18E-01 | 7.27E-01 |
| SNORA37  | 0.0283  | 5.87E-01 | 7.02E-01 |
| SNORA38B | -0.0392 | 4.52E-01 | 5.83E-01 |
| SNORA38  | 0.0729  | 1.61E-01 | 2.68E-01 |
| SNORA39  | 0.1727  | 8.37E-04 | 3.69E-03 |
| SNORA3   | 0.0283  | 5.87E-01 | 7.02E-01 |
| SNORA40  | 0.0457  | 3.80E-01 | 5.14E-01 |
| SNORA41  | 0.1172  | 2.40E-02 | 5.95E-02 |
| SNORA42  | 0.0621  | 2.33E-01 | 3.56E-01 |
| SNORA44  | 0.0424  | 4.16E-01 | 5.49E-01 |
| SNORA45  | 0.0657  | 2.07E-01 | 3.25E-01 |
| SNORA46  | 0.0712  | 1.71E-01 | 2.80E-01 |
| SNORA47  | -0.0255 | 6.25E-01 | 7.33E-01 |
| SNORA48  | 0.0268  | 6.07E-01 | 7.19E-01 |
| SNORA49  | 0.0312  | 5.49E-01 | 6.70E-01 |
| SNORA4   | 0.0060  | 9.08E-01 | 9.42E-01 |
| SNORA50  | 0.0644  | 2.16E-01 | 3.36E-01 |
| SNORA51  | -0.0064 | 9.02E-01 | 9.38E-01 |
| SNORA52  | 0.0738  | 1.56E-01 | 2.62E-01 |
| SNORA53  | 0.0143  | 7.83E-01 | 8.56E-01 |
| SNORA54  | 0.0398  | 4.45E-01 | 5.77E-01 |
| SNORA55  | -0.0041 | 9.37E-01 | 9.61E-01 |
| SNORA56  | 0.0661  | 2.04E-01 | 3.22E-01 |
| SNORA57  | 0.1631  | 1.62E-03 | 6.47E-03 |
| SNORA58  | 0.0074  | 8.87E-01 | 9.28E-01 |
| SNORA59B | 0.0651  | 2.11E-01 | 3.30E-01 |
| SNORA5A  | -0.0050 | 9.23E-01 | 9.52E-01 |
| SNORA5B  | 0.0822  | 1.14E-01 | 2.06E-01 |
| SNORA5C  | 0.0108  | 8.36E-01 | 8.93E-01 |
| SNORA61  | 0.0623  | 2.32E-01 | 3.55E-01 |
| SNORA62  | 0.0823  | 1.13E-01 | 2.05E-01 |
| SNORA63  | 0.1093  | 3.53E-02 | 8.15E-02 |
| SNORA64  | 0.0017  | 9.74E-01 | 9.83E-01 |
| SNORA65  | 0.0508  | 3.29E-01 | 4.60E-01 |
| SNORA66  | 0.0136  | 7.94E-01 | 8.63E-01 |
| SNORA67  | 0.1956  | 1.50E-04 | 8.63E-04 |
| SNORA68  | 0.0384  | 4.61E-01 | 5.91E-01 |
| SNORA6   | 0.0949  | 6.77E-02 | 1.37E-01 |

|             |         |          |          |
|-------------|---------|----------|----------|
| SNORA70     | 0.0545  | 2.95E-01 | 4.24E-01 |
| SNORA71A    | 0.0185  | 7.23E-01 | 8.12E-01 |
| SNORA71B    | 0.0200  | 7.02E-01 | 7.95E-01 |
| SNORA71C    | -0.0004 | 9.94E-01 | 9.96E-01 |
| SNORA71D    | 0.0260  | 6.17E-01 | 7.27E-01 |
| SNORA72     | 0.0857  | 9.92E-02 | 1.85E-01 |
| SNORA74A    | 0.0328  | 5.29E-01 | 6.52E-01 |
| SNORA74B    | 0.0554  | 2.87E-01 | 4.16E-01 |
| SNORA75     | -0.0003 | 9.95E-01 | 9.97E-01 |
| SNORA76     | 0.1855  | 3.29E-04 | 1.69E-03 |
| SNORA77     | -0.0499 | 3.38E-01 | 4.69E-01 |
| SNORA79     | 0.0408  | 4.33E-01 | 5.65E-01 |
| SNORA7B     | 0.0378  | 4.68E-01 | 5.98E-01 |
| SNORA80     | -0.0506 | 3.31E-01 | 4.62E-01 |
| SNORA81     | 0.0926  | 7.48E-02 | 1.48E-01 |
| SNORA84     | -0.0170 | 7.45E-01 | 8.28E-01 |
| SNORA8      | 0.2188  | 2.12E-05 | 1.63E-04 |
| SNORA9      | -0.0113 | 8.29E-01 | 8.88E-01 |
| SNORD10     | 0.1146  | 2.72E-02 | 6.61E-02 |
| SNORD115-13 | -0.0473 | 3.64E-01 | 4.96E-01 |
| SNORD115-26 | -0.1172 | 2.40E-02 | 5.96E-02 |
| SNORD115-7  | -0.0695 | 1.82E-01 | 2.94E-01 |
| SNORD116-20 | 0.0034  | 9.48E-01 | 9.68E-01 |
| SNORD116-28 | 0.0949  | 6.80E-02 | 1.37E-01 |
| SNORD116-4  | -0.0187 | 7.20E-01 | 8.10E-01 |
| SNORD15A    | 0.0739  | 1.55E-01 | 2.61E-01 |
| SNORD15B    | 0.0281  | 5.90E-01 | 7.04E-01 |
| SNORD17     | 0.0570  | 2.73E-01 | 4.01E-01 |
| SNORD1C     | 0.1870  | 2.94E-04 | 1.53E-03 |
| SNORD22     | 0.0545  | 2.95E-01 | 4.24E-01 |
| SNORD89     | 0.0873  | 9.31E-02 | 1.76E-01 |
| SNORD94     | 0.0186  | 7.22E-01 | 8.11E-01 |
| SNORD97     | -0.0233 | 6.55E-01 | 7.57E-01 |
| SNPH        | -0.0343 | 5.10E-01 | 6.34E-01 |
| SNRK        | -0.2263 | 1.08E-05 | 9.00E-05 |
| SNRNP200    | 0.2061  | 6.36E-05 | 4.15E-04 |
| SNRNP25     | 0.0253  | 6.27E-01 | 7.35E-01 |
| SNRNP27     | 0.0463  | 3.74E-01 | 5.07E-01 |
| SNRNP35     | 0.0458  | 3.79E-01 | 5.12E-01 |
| SNRNP40     | 0.2121  | 3.82E-05 | 2.70E-04 |
| SNRNP48     | 0.2005  | 1.01E-04 | 6.13E-04 |
| SNRNP70     | 0.3117  | 8.45E-10 | 2.04E-08 |
| SNRPA1      | 0.2924  | 9.52E-09 | 1.78E-07 |
| SNRPA       | 0.2891  | 1.42E-08 | 2.54E-07 |

|        |         |          |          |
|--------|---------|----------|----------|
| SNRPB2 | 0.2060  | 6.42E-05 | 4.18E-04 |
| SNRPB  | 0.3092  | 1.17E-09 | 2.72E-08 |
| SNRPC  | 0.2195  | 1.99E-05 | 1.54E-04 |
| SNRPD1 | 0.3392  | 1.92E-11 | 6.53E-10 |
| SNRPD2 | 0.2163  | 2.65E-05 | 1.97E-04 |
| SNRPD3 | 0.1704  | 9.83E-04 | 4.24E-03 |
| SNRPE  | 0.3957  | 2.36E-15 | 1.75E-13 |
| SNRPF  | 0.1783  | 5.59E-04 | 2.61E-03 |
| SNRPG  | 0.2961  | 6.10E-09 | 1.19E-07 |
| SNRPN  | 0.0318  | 5.42E-01 | 6.63E-01 |
| SNTA1  | -0.0126 | 8.09E-01 | 8.74E-01 |
| SNTB1  | -0.1025 | 4.86E-02 | 1.05E-01 |
| SNTB2  | -0.0489 | 3.47E-01 | 4.80E-01 |
| SNTG1  | -0.1148 | 2.71E-02 | 6.57E-02 |
| SNTG2  | -0.0027 | 9.58E-01 | 9.74E-01 |
| SNTN   | 0.1071  | 3.92E-02 | 8.88E-02 |
| SNUPN  | 0.1440  | 5.45E-03 | 1.77E-02 |
| SNURF  | 0.0413  | 4.27E-01 | 5.60E-01 |
| SNW1   | 0.1449  | 5.17E-03 | 1.70E-02 |
| SNX10  | 0.0016  | 9.76E-01 | 9.85E-01 |
| SNX11  | 0.1300  | 1.22E-02 | 3.44E-02 |
| SNX12  | -0.0484 | 3.53E-01 | 4.85E-01 |
| SNX13  | -0.0563 | 2.80E-01 | 4.08E-01 |
| SNX14  | 0.0736  | 1.57E-01 | 2.63E-01 |
| SNX15  | 0.1475  | 4.41E-03 | 1.49E-02 |
| SNX16  | 0.0159  | 7.60E-01 | 8.38E-01 |
| SNX17  | -0.1194 | 2.15E-02 | 5.44E-02 |
| SNX18  | -0.0175 | 7.37E-01 | 8.22E-01 |
| SNX19  | -0.0485 | 3.52E-01 | 4.84E-01 |
| SNX1   | -0.1323 | 1.07E-02 | 3.09E-02 |
| SNX20  | -0.0774 | 1.37E-01 | 2.36E-01 |
| SNX21  | -0.0253 | 6.27E-01 | 7.36E-01 |
| SNX22  | 0.0978  | 6.00E-02 | 1.24E-01 |
| SNX24  | -0.0020 | 9.69E-01 | 9.81E-01 |
| SNX25  | -0.1331 | 1.02E-02 | 2.98E-02 |
| SNX27  | 0.4251  | 1.04E-17 | 1.40E-15 |
| SNX29  | 0.0948  | 6.83E-02 | 1.38E-01 |
| SNX2   | -0.0737 | 1.56E-01 | 2.62E-01 |
| SNX30  | -0.0021 | 9.69E-01 | 9.80E-01 |
| SNX31  | -0.1185 | 2.24E-02 | 5.64E-02 |
| SNX32  | 0.0193  | 7.11E-01 | 8.03E-01 |
| SNX33  | -0.1066 | 4.01E-02 | 9.04E-02 |
| SNX3   | 0.0283  | 5.86E-01 | 7.02E-01 |
| SNX4   | -0.1441 | 5.41E-03 | 1.76E-02 |

|         |         |          |          |
|---------|---------|----------|----------|
| SNX5    | 0.0390  | 4.53E-01 | 5.84E-01 |
| SNX6    | -0.0378 | 4.68E-01 | 5.98E-01 |
| SNX7    | 0.0685  | 1.88E-01 | 3.01E-01 |
| SNX8    | 0.1595  | 2.06E-03 | 7.90E-03 |
| SNX9    | -0.0233 | 6.55E-01 | 7.57E-01 |
| SOAT1   | 0.2769  | 5.89E-08 | 9.03E-07 |
| SOAT2   | 0.0497  | 3.40E-01 | 4.71E-01 |
| SOBP    | 0.0019  | 9.70E-01 | 9.81E-01 |
| SOCS1   | -0.0024 | 9.64E-01 | 9.78E-01 |
| SOCS2   | -0.2062 | 6.28E-05 | 4.10E-04 |
| SOCS3   | -0.1337 | 9.93E-03 | 2.91E-02 |
| SOCS4   | 0.0956  | 6.60E-02 | 1.34E-01 |
| SOCS5   | 0.1996  | 1.08E-04 | 6.51E-04 |
| SOCS6   | -0.0336 | 5.18E-01 | 6.42E-01 |
| SOCS7   | 0.2699  | 1.30E-07 | 1.84E-06 |
| SOD1    | -0.1160 | 2.55E-02 | 6.25E-02 |
| SOD2    | -0.0782 | 1.33E-01 | 2.31E-01 |
| SOD3    | -0.0058 | 9.11E-01 | 9.44E-01 |
| SOHLH1  | 0.0896  | 8.47E-02 | 1.63E-01 |
| SOHLH2  | 0.0247  | 6.35E-01 | 7.42E-01 |
| SOLH    | 0.2113  | 4.09E-05 | 2.85E-04 |
| SON     | 0.0373  | 4.74E-01 | 6.02E-01 |
| SORBS1  | -0.2399 | 2.96E-06 | 2.93E-05 |
| SORBS2  | -0.2129 | 3.55E-05 | 2.53E-04 |
| SORBS3  | -0.1492 | 3.98E-03 | 1.37E-02 |
| SORCS1  | 0.1875  | 2.81E-04 | 1.48E-03 |
| SORCS2  | 0.0020  | 9.69E-01 | 9.80E-01 |
| SORCS3  | 0.0343  | 5.10E-01 | 6.35E-01 |
| SORD    | -0.2090 | 4.98E-05 | 3.38E-04 |
| SORL1   | -0.2225 | 1.52E-05 | 1.21E-04 |
| SORT1   | -0.0014 | 9.78E-01 | 9.86E-01 |
| SOS1    | -0.0106 | 8.38E-01 | 8.94E-01 |
| SOS2    | -0.0375 | 4.71E-01 | 6.00E-01 |
| SOSTDC1 | 0.0973  | 6.13E-02 | 1.26E-01 |
| SOST    | -0.0193 | 7.11E-01 | 8.03E-01 |
| SOX10   | -0.0375 | 4.72E-01 | 6.01E-01 |
| SOX11   | 0.1330  | 1.03E-02 | 3.00E-02 |
| SOX12   | 0.0783  | 1.32E-01 | 2.30E-01 |
| SOX13   | 0.2673  | 1.73E-07 | 2.39E-06 |
| SOX14   | -0.0058 | 9.12E-01 | 9.44E-01 |
| SOX15   | 0.0011  | 9.83E-01 | 9.90E-01 |
| SOX17   | -0.1435 | 5.63E-03 | 1.82E-02 |
| SOX18   | -0.1042 | 4.49E-02 | 9.89E-02 |
| SOX1    | -0.0306 | 5.57E-01 | 6.76E-01 |

|         |         |          |          |
|---------|---------|----------|----------|
| SOX21   | -0.0087 | 8.68E-01 | 9.15E-01 |
| SOX20T  | -0.1515 | 3.44E-03 | 1.21E-02 |
| SOX2    | -0.0269 | 6.06E-01 | 7.18E-01 |
| SOX30   | 0.0135  | 7.95E-01 | 8.64E-01 |
| SOX3    | 0.0346  | 5.06E-01 | 6.31E-01 |
| SOX4    | 0.1602  | 1.97E-03 | 7.60E-03 |
| SOX5    | -0.1201 | 2.06E-02 | 5.27E-02 |
| SOX6    | -0.1417 | 6.26E-03 | 1.98E-02 |
| SOX7    | -0.2111 | 4.17E-05 | 2.90E-04 |
| SOX8    | -0.0435 | 4.04E-01 | 5.37E-01 |
| SOX9    | 0.1916  | 2.05E-04 | 1.13E-03 |
| SP100   | -0.2125 | 3.69E-05 | 2.62E-04 |
| SP110   | 0.0988  | 5.73E-02 | 1.20E-01 |
| SP140L  | 0.0799  | 1.24E-01 | 2.20E-01 |
| SP140   | 0.0982  | 5.89E-02 | 1.22E-01 |
| SP1     | 0.1667  | 1.27E-03 | 5.27E-03 |
| SP2     | 0.1472  | 4.50E-03 | 1.51E-02 |
| SP3     | 0.1788  | 5.41E-04 | 2.54E-03 |
| SP4     | 0.1721  | 8.75E-04 | 3.83E-03 |
| SP5     | 0.0736  | 1.57E-01 | 2.63E-01 |
| SP6     | 0.0330  | 5.26E-01 | 6.49E-01 |
| SP7     | 0.0803  | 1.23E-01 | 2.18E-01 |
| SP8     | 0.2492  | 1.17E-06 | 1.30E-05 |
| SP9     | 0.1733  | 8.03E-04 | 3.56E-03 |
| SPA17   | 0.2166  | 2.58E-05 | 1.93E-04 |
| SPACA1  | -0.0666 | 2.01E-01 | 3.17E-01 |
| SPACA3  | 0.0260  | 6.18E-01 | 7.27E-01 |
| SPACA4  | 0.1008  | 5.23E-02 | 1.11E-01 |
| SPACA5  | 0.0912  | 7.94E-02 | 1.55E-01 |
| SPAG11A | 0.0453  | 3.84E-01 | 5.17E-01 |
| SPAG11B | 0.0494  | 3.42E-01 | 4.74E-01 |
| SPAG16  | 0.0005  | 9.92E-01 | 9.95E-01 |
| SPAG17  | 0.2050  | 6.98E-05 | 4.49E-04 |
| SPAG1   | 0.1124  | 3.04E-02 | 7.23E-02 |
| SPAG4   | -0.0357 | 4.92E-01 | 6.19E-01 |
| SPAG5   | 0.3779  | 4.89E-14 | 2.76E-12 |
| SPAG6   | 0.2535  | 7.52E-07 | 8.78E-06 |
| SPAG7   | -0.1664 | 1.29E-03 | 5.35E-03 |
| SPAG8   | 0.1503  | 3.71E-03 | 1.29E-02 |
| SPAG9   | 0.0638  | 2.21E-01 | 3.41E-01 |
| SPAM1   | 0.0018  | 9.72E-01 | 9.82E-01 |
| SPANXA2 | 0.1192  | 2.16E-02 | 5.47E-02 |
| SPANXB2 | 0.1549  | 2.78E-03 | 1.02E-02 |
| SPANXC  | 0.1207  | 2.01E-02 | 5.15E-02 |

|          |         |          |          |
|----------|---------|----------|----------|
| SPANXE   | 0.1993  | 1.12E-04 | 6.68E-04 |
| SPANXN1  | 0.1309  | 1.16E-02 | 3.31E-02 |
| SPANXN2  | -0.0262 | 6.15E-01 | 7.25E-01 |
| SPANXN3  | 0.0802  | 1.23E-01 | 2.18E-01 |
| SPANXN4  | -0.0077 | 8.82E-01 | 9.25E-01 |
| SPANXN5  | 0.0449  | 3.89E-01 | 5.22E-01 |
| SPARCL1  | -0.2084 | 5.24E-05 | 3.53E-04 |
| SPARC    | -0.0991 | 5.65E-02 | 1.18E-01 |
| SPAST    | 0.0993  | 5.61E-02 | 1.18E-01 |
| SPATA12  | 0.0522  | 3.16E-01 | 4.46E-01 |
| SPATA13  | -0.0101 | 8.46E-01 | 8.99E-01 |
| SPATA16  | -0.0107 | 8.38E-01 | 8.93E-01 |
| SPATA17  | 0.2433  | 2.11E-06 | 2.19E-05 |
| SPATA18  | -0.2141 | 3.22E-05 | 2.32E-04 |
| SPATA19  | 0.0449  | 3.89E-01 | 5.22E-01 |
| SPATA1   | -0.0227 | 6.63E-01 | 7.64E-01 |
| SPATA20  | -0.0882 | 8.97E-02 | 1.71E-01 |
| SPATA21  | 0.0354  | 4.97E-01 | 6.23E-01 |
| SPATA22  | -0.1162 | 2.52E-02 | 6.19E-02 |
| SPATA24  | 0.0381  | 4.64E-01 | 5.95E-01 |
| SPATA2L  | -0.0982 | 5.87E-02 | 1.22E-01 |
| SPATA2   | 0.2022  | 8.79E-05 | 5.47E-04 |
| SPATA3   | 0.0836  | 1.08E-01 | 1.97E-01 |
| SPATA4   | 0.0236  | 6.51E-01 | 7.55E-01 |
| SPATA5L1 | 0.1777  | 5.85E-04 | 2.71E-03 |
| SPATA5   | 0.0284  | 5.86E-01 | 7.01E-01 |
| SPATA6   | 0.0771  | 1.38E-01 | 2.38E-01 |
| SPATA7   | 0.0405  | 4.37E-01 | 5.69E-01 |
| SPATA8   | 0.1009  | 5.21E-02 | 1.11E-01 |
| SPATA9   | -0.0309 | 5.53E-01 | 6.72E-01 |
| SPATC1   | 0.0818  | 1.16E-01 | 2.09E-01 |
| SPATS1   | 0.0940  | 7.06E-02 | 1.41E-01 |
| SPATS2L  | 0.1995  | 1.10E-04 | 6.58E-04 |
| SPATS2   | 0.3482  | 5.14E-12 | 1.99E-10 |
| SPC24    | 0.2800  | 4.12E-08 | 6.56E-07 |
| SPC25    | 0.4247  | 1.11E-17 | 1.47E-15 |
| SPCS1    | -0.1499 | 3.81E-03 | 1.32E-02 |
| SPCS2    | 0.1151  | 2.66E-02 | 6.49E-02 |
| SPCS3    | -0.2892 | 1.40E-08 | 2.51E-07 |
| SPDEF    | 0.0086  | 8.68E-01 | 9.15E-01 |
| SPDYA    | 0.2049  | 7.01E-05 | 4.51E-04 |
| SPDYC    | -0.2162 | 2.66E-05 | 1.98E-04 |
| SPDYE1   | 0.2071  | 5.82E-05 | 3.85E-04 |
| SPDYE2   | 0.1054  | 4.24E-02 | 9.44E-02 |



|         |         |          |          |
|---------|---------|----------|----------|
| SPDYE3  | -0.0446 | 3.91E-01 | 5.24E-01 |
| SPDYE4  | 0.0436  | 4.02E-01 | 5.35E-01 |
| SPDYE5  | 0.2017  | 9.11E-05 | 5.64E-04 |
| SPDYE6  | 0.2106  | 4.32E-05 | 2.99E-04 |
| SPDYE7P | 0.1290  | 1.29E-02 | 3.60E-02 |
| SPDYE8P | -0.0189 | 7.17E-01 | 8.08E-01 |
| SPEF1   | 0.0485  | 3.52E-01 | 4.84E-01 |
| SPEF2   | 0.3841  | 1.72E-14 | 1.06E-12 |
| SPEG    | -0.0142 | 7.86E-01 | 8.58E-01 |
| SPEM1   | 0.0849  | 1.03E-01 | 1.89E-01 |
| SPEN    | 0.0563  | 2.80E-01 | 4.08E-01 |
| SPERT   | 0.1820  | 4.27E-04 | 2.08E-03 |
| SPESP1  | -0.0503 | 3.34E-01 | 4.65E-01 |
| SPG11   | -0.1206 | 2.01E-02 | 5.16E-02 |
| SPG20   | -0.1226 | 1.81E-02 | 4.75E-02 |
| SPG21   | -0.0256 | 6.23E-01 | 7.32E-01 |
| SPG7    | -0.3021 | 2.88E-09 | 6.11E-08 |
| SPHAR   | 0.0949  | 6.80E-02 | 1.37E-01 |
| SPHK1   | 0.1936  | 1.75E-04 | 9.84E-04 |
| SPHK2   | 0.0037  | 9.44E-01 | 9.65E-01 |
| SPHKAP  | 0.0251  | 6.30E-01 | 7.38E-01 |
| SPI1    | -0.0396 | 4.47E-01 | 5.79E-01 |
| SPIB    | 0.2324  | 6.11E-06 | 5.50E-05 |
| SPIC    | -0.1387 | 7.46E-03 | 2.29E-02 |
| SPIN1   | 0.1616  | 1.79E-03 | 7.03E-03 |
| SPIN2A  | 0.0529  | 3.10E-01 | 4.39E-01 |
| SPIN2B  | 0.1030  | 4.74E-02 | 1.03E-01 |
| SPIN3   | 0.1888  | 2.55E-04 | 1.36E-03 |
| SPIN4   | 0.2477  | 1.36E-06 | 1.49E-05 |
| SPINK13 | 0.1179  | 2.32E-02 | 5.79E-02 |
| SPINK14 | -0.0362 | 4.87E-01 | 6.14E-01 |
| SPINK1  | 0.0478  | 3.58E-01 | 4.91E-01 |
| SPINK2  | 0.0760  | 1.44E-01 | 2.46E-01 |
| SPINK4  | 0.1380  | 7.77E-03 | 2.37E-02 |
| SPINK5  | 0.0204  | 6.95E-01 | 7.89E-01 |
| SPINK6  | -0.0145 | 7.80E-01 | 8.53E-01 |
| SPINK7  | -0.0575 | 2.69E-01 | 3.97E-01 |
| SPINK8  | -0.0311 | 5.51E-01 | 6.71E-01 |
| SPINK9  | 0.0792  | 1.28E-01 | 2.25E-01 |
| SPINLW1 | 0.0521  | 3.16E-01 | 4.46E-01 |
| SPINT1  | 0.1900  | 2.32E-04 | 1.25E-03 |
| SPINT2  | 0.1277  | 1.38E-02 | 3.82E-02 |
| SPINT3  | -0.0505 | 3.32E-01 | 4.63E-01 |
| SPIRE1  | -0.0082 | 8.75E-01 | 9.20E-01 |

|        |         |          |          |
|--------|---------|----------|----------|
| SPIRE2 | 0.0902  | 8.27E-02 | 1.60E-01 |
| SPNS1  | 0.1293  | 1.27E-02 | 3.55E-02 |
| SPNS2  | -0.3030 | 2.57E-09 | 5.50E-08 |
| SPNS3  | 0.0166  | 7.49E-01 | 8.31E-01 |
| SPN    | -0.0927 | 7.44E-02 | 1.47E-01 |
| SPO11  | 0.0310  | 5.52E-01 | 6.72E-01 |
| SPOCD1 | 0.1836  | 3.79E-04 | 1.89E-03 |
| SPOCK1 | -0.0233 | 6.54E-01 | 7.57E-01 |
| SPOCK2 | -0.0778 | 1.35E-01 | 2.34E-01 |
| SPOCK3 | 0.0764  | 1.42E-01 | 2.43E-01 |
| SPON1  | -0.1207 | 2.00E-02 | 5.15E-02 |
| SPON2  | 0.0185  | 7.23E-01 | 8.12E-01 |
| SPOPL  | 0.0838  | 1.07E-01 | 1.96E-01 |
| SPOP   | 0.1925  | 1.92E-04 | 1.06E-03 |
| SPP1   | 0.1206  | 2.02E-02 | 5.17E-02 |
| SPP2   | -0.1955 | 1.51E-04 | 8.67E-04 |
| SPPL2A | -0.2118 | 3.92E-05 | 2.75E-04 |
| SPPL2B | 0.1036  | 4.61E-02 | 1.01E-01 |
| SPPL3  | 0.0781  | 1.33E-01 | 2.32E-01 |
| SPRED1 | 0.0353  | 4.98E-01 | 6.24E-01 |
| SPRED2 | -0.0142 | 7.85E-01 | 8.57E-01 |
| SPRED3 | -0.0220 | 6.73E-01 | 7.72E-01 |
| SPRN   | 0.0848  | 1.03E-01 | 1.90E-01 |
| SPRR1A | -0.0735 | 1.58E-01 | 2.64E-01 |
| SPRR1B | -0.0759 | 1.45E-01 | 2.47E-01 |
| SPRR2A | -0.1221 | 1.86E-02 | 4.85E-02 |
| SPRR2B | -0.0848 | 1.03E-01 | 1.90E-01 |
| SPRR2C | -0.0773 | 1.37E-01 | 2.37E-01 |
| SPRR2D | -0.0511 | 3.26E-01 | 4.56E-01 |
| SPRR2E | -0.0607 | 2.43E-01 | 3.68E-01 |
| SPRR2F | -0.0079 | 8.80E-01 | 9.23E-01 |
| SPRR2G | -0.0527 | 3.11E-01 | 4.41E-01 |
| SPRR3  | -0.0649 | 2.12E-01 | 3.31E-01 |
| SPRR4  | -0.0017 | 9.74E-01 | 9.83E-01 |
| SPRY1  | -0.2365 | 4.12E-06 | 3.94E-05 |
| SPRY2  | -0.1022 | 4.93E-02 | 1.06E-01 |
| SPRY3  | -0.0056 | 9.14E-01 | 9.46E-01 |
| SPRY4  | -0.0228 | 6.61E-01 | 7.63E-01 |
| SPRYD3 | -0.0638 | 2.20E-01 | 3.41E-01 |
| SPRYD4 | -0.3185 | 3.41E-10 | 9.11E-09 |
| SPRYD5 | -0.0427 | 4.12E-01 | 5.45E-01 |
| SPR    | -0.2466 | 1.52E-06 | 1.64E-05 |
| SPSB1  | -0.1522 | 3.29E-03 | 1.17E-02 |
| SPSB2  | 0.2004  | 1.02E-04 | 6.17E-04 |

|         |         |          |          |
|---------|---------|----------|----------|
| SPSB3   | 0.0525  | 3.13E-01 | 4.43E-01 |
| SPSB4   | -0.1075 | 3.86E-02 | 8.76E-02 |
| SPTA1   | 0.0356  | 4.95E-01 | 6.21E-01 |
| SPTAN1  | 0.1944  | 1.65E-04 | 9.33E-04 |
| SPTBN1  | -0.1016 | 5.05E-02 | 1.08E-01 |
| SPTBN2  | -0.0946 | 6.89E-02 | 1.38E-01 |
| SPTBN4  | -0.1313 | 1.14E-02 | 3.24E-02 |
| SPTBN5  | 0.1038  | 4.58E-02 | 1.00E-01 |
| SPTB    | 0.1095  | 3.50E-02 | 8.09E-02 |
| SPTLC1  | 0.2075  | 5.64E-05 | 3.76E-04 |
| SPTLC2  | -0.1395 | 7.12E-03 | 2.21E-02 |
| SPTLC3  | -0.0364 | 4.85E-01 | 6.13E-01 |
| SPTY2D1 | 0.0692  | 1.83E-01 | 2.96E-01 |
| SPZ1    | 0.1656  | 1.37E-03 | 5.60E-03 |
| SQLE    | 0.1100  | 3.41E-02 | 7.93E-02 |
| SQRDL   | 0.0274  | 5.98E-01 | 7.12E-01 |
| SQSTM1  | 0.1168  | 2.44E-02 | 6.04E-02 |
| SR140   | 0.3171  | 4.11E-10 | 1.07E-08 |
| SRA1    | -0.0308 | 5.54E-01 | 6.74E-01 |
| SRBD1   | -0.1381 | 7.71E-03 | 2.36E-02 |
| SRCAP   | 0.1317  | 1.11E-02 | 3.18E-02 |
| SRCIN1  | 0.0630  | 2.26E-01 | 3.48E-01 |
| SRCRB4D | 0.0251  | 6.30E-01 | 7.37E-01 |
| SRC     | 0.1978  | 1.25E-04 | 7.40E-04 |
| SRD5A1  | -0.2573 | 5.05E-07 | 6.17E-06 |
| SRD5A2  | -0.2839 | 2.63E-08 | 4.37E-07 |
| SRD5A3  | -0.0281 | 5.89E-01 | 7.04E-01 |
| SREBF1  | 0.0215  | 6.80E-01 | 7.78E-01 |
| SREBF2  | 0.1040  | 4.53E-02 | 9.95E-02 |
| SRFBP1  | 0.0475  | 3.62E-01 | 4.94E-01 |
| SRF     | 0.1981  | 1.22E-04 | 7.24E-04 |
| SRGAP1  | 0.0847  | 1.03E-01 | 1.91E-01 |
| SRGAP2  | 0.2021  | 8.87E-05 | 5.51E-04 |
| SRGAP3  | -0.1074 | 3.88E-02 | 8.79E-02 |
| SRGN    | -0.1487 | 4.09E-03 | 1.40E-02 |
| SRI     | 0.0696  | 1.81E-01 | 2.93E-01 |
| SRL     | -0.2720 | 1.02E-07 | 1.48E-06 |
| SRMS    | 0.0982  | 5.89E-02 | 1.22E-01 |
| SRM     | 0.0022  | 9.67E-01 | 9.79E-01 |
| SRP14   | -0.0026 | 9.61E-01 | 9.75E-01 |
| SRP19   | 0.0989  | 5.70E-02 | 1.19E-01 |
| SRP54   | -0.0393 | 4.50E-01 | 5.81E-01 |
| SRP68   | 0.2497  | 1.11E-06 | 1.24E-05 |
| SRP72   | 0.1072  | 3.91E-02 | 8.85E-02 |

|        |         |          |          |
|--------|---------|----------|----------|
| SRP9   | 0.2022  | 8.76E-05 | 5.45E-04 |
| SRPK1  | 0.1436  | 5.58E-03 | 1.80E-02 |
| SRPK2  | -0.0234 | 6.53E-01 | 7.56E-01 |
| SRPK3  | 0.2309  | 7.01E-06 | 6.18E-05 |
| SRPRB  | -0.0354 | 4.96E-01 | 6.22E-01 |
| SRPR   | -0.1256 | 1.55E-02 | 4.17E-02 |
| SRPX2  | -0.0368 | 4.80E-01 | 6.08E-01 |
| SRPX   | -0.1571 | 2.40E-03 | 8.96E-03 |
| SRRD   | 0.1397  | 7.06E-03 | 2.19E-02 |
| SRRM1  | 0.0310  | 5.51E-01 | 6.71E-01 |
| SRRM2  | 0.1258  | 1.53E-02 | 4.14E-02 |
| SRRM3  | 0.0353  | 4.97E-01 | 6.24E-01 |
| SRRM4  | 0.1077  | 3.81E-02 | 8.68E-02 |
| SRRM5  | 0.1408  | 6.61E-03 | 2.08E-02 |
| SRRT   | 0.4194  | 3.09E-17 | 3.52E-15 |
| SRR    | -0.2611 | 3.37E-07 | 4.33E-06 |
| SRXN1  | 0.1299  | 1.23E-02 | 3.46E-02 |
| SRY    | -0.0375 | 4.71E-01 | 6.00E-01 |
| SS18L1 | -0.0869 | 9.48E-02 | 1.78E-01 |
| SS18L2 | 0.0940  | 7.05E-02 | 1.41E-01 |
| SS18   | 0.0099  | 8.49E-01 | 9.02E-01 |
| SSBP1  | 0.0182  | 7.26E-01 | 8.14E-01 |
| SSBP2  | 0.0687  | 1.87E-01 | 3.00E-01 |
| SSBP3  | -0.0780 | 1.34E-01 | 2.32E-01 |
| SSBP4  | 0.0720  | 1.66E-01 | 2.74E-01 |
| SSB    | 0.2353  | 4.62E-06 | 4.35E-05 |
| SSC5D  | -0.0784 | 1.31E-01 | 2.29E-01 |
| SSFA2  | -0.0890 | 8.70E-02 | 1.66E-01 |
| SSH1   | -0.0240 | 6.45E-01 | 7.50E-01 |
| SSH2   | 0.2186  | 2.17E-05 | 1.65E-04 |
| SSH3   | 0.0813  | 1.18E-01 | 2.11E-01 |
| SSNA1  | 0.1694  | 1.06E-03 | 4.50E-03 |
| SSPN   | 0.0211  | 6.85E-01 | 7.82E-01 |
| SSPO   | -0.0498 | 3.39E-01 | 4.70E-01 |
| SSR1   | 0.1624  | 1.70E-03 | 6.72E-03 |
| SSR2   | 0.4511  | 5.31E-20 | 1.36E-17 |
| SSR3   | 0.0371  | 4.76E-01 | 6.05E-01 |
| SSR4   | 0.1514  | 3.47E-03 | 1.22E-02 |
| SSRP1  | 0.2877  | 1.67E-08 | 2.96E-07 |
| SSSCA1 | 0.0221  | 6.72E-01 | 7.71E-01 |
| SSTR1  | -0.0183 | 7.26E-01 | 8.14E-01 |
| SSTR2  | 0.0556  | 2.86E-01 | 4.15E-01 |
| SSTR3  | 0.1048  | 4.36E-02 | 9.65E-02 |
| SSTR4  | -0.0249 | 6.33E-01 | 7.40E-01 |

|            |         |          |          |
|------------|---------|----------|----------|
| SSTR5      | 0.1353  | 9.06E-03 | 2.70E-02 |
| SST        | 0.0363  | 4.86E-01 | 6.14E-01 |
| SSU72      | -0.0672 | 1.97E-01 | 3.12E-01 |
| SSX1       | 0.0435  | 4.03E-01 | 5.36E-01 |
| SSX2IP     | 0.1170  | 2.42E-02 | 6.00E-02 |
| SSX2       | 0.0516  | 3.21E-01 | 4.52E-01 |
| SSX3       | 0.0632  | 2.24E-01 | 3.46E-01 |
| SSX4       | 0.1082  | 3.73E-02 | 8.53E-02 |
| SSX5       | 0.0495  | 3.41E-01 | 4.73E-01 |
| SSX6       | 0.1059  | 4.15E-02 | 9.27E-02 |
| SSX7       | 0.1218  | 1.89E-02 | 4.91E-02 |
| SSX8       | 0.0768  | 1.40E-01 | 2.41E-01 |
| ST13       | -0.0454 | 3.83E-01 | 5.17E-01 |
| ST14       | 0.0379  | 4.67E-01 | 5.97E-01 |
| ST18       | 0.0648  | 2.13E-01 | 3.32E-01 |
| ST20       | 0.0418  | 4.22E-01 | 5.55E-01 |
| ST3GAL1    | -0.2726 | 9.61E-08 | 1.40E-06 |
| ST3GAL2    | -0.2041 | 7.53E-05 | 4.80E-04 |
| ST3GAL3    | -0.1422 | 6.09E-03 | 1.94E-02 |
| ST3GAL4    | -0.0520 | 3.18E-01 | 4.48E-01 |
| ST3GAL5    | -0.1098 | 3.45E-02 | 8.01E-02 |
| ST3GAL6    | -0.2627 | 2.84E-07 | 3.73E-06 |
| ST5        | 0.1225  | 1.82E-02 | 4.76E-02 |
| ST6GAL1    | -0.0983 | 5.85E-02 | 1.22E-01 |
| ST6GAL2    | -0.1018 | 5.00E-02 | 1.08E-01 |
| ST6GALNAC1 | -0.0819 | 1.15E-01 | 2.08E-01 |
| ST6GALNAC2 | 0.1172  | 2.40E-02 | 5.95E-02 |
| ST6GALNAC3 | -0.2250 | 1.21E-05 | 9.92E-05 |
| ST6GALNAC4 | 0.1426  | 5.93E-03 | 1.90E-02 |
| ST6GALNAC5 | 0.1308  | 1.17E-02 | 3.32E-02 |
| ST6GALNAC6 | -0.2203 | 1.85E-05 | 1.45E-04 |
| ST7L       | 0.1186  | 2.23E-02 | 5.61E-02 |
| ST7OT1     | 0.0047  | 9.28E-01 | 9.55E-01 |
| ST7OT2     | 0.0110  | 8.33E-01 | 8.91E-01 |
| ST7OT3     | 0.0347  | 5.05E-01 | 6.30E-01 |
| ST7OT4     | 0.0000  | 1.00E+00 | 1.00E+00 |
| ST7        | -0.2528 | 8.06E-07 | 9.36E-06 |
| ST8SIA1    | -0.0136 | 7.94E-01 | 8.63E-01 |
| ST8SIA2    | -0.0779 | 1.34E-01 | 2.33E-01 |
| ST8SIA3    | -0.0293 | 5.74E-01 | 6.91E-01 |
| ST8SIA4    | -0.0455 | 3.82E-01 | 5.16E-01 |
| ST8SIA5    | -0.0442 | 3.96E-01 | 5.28E-01 |
| ST8SIA6    | -0.2244 | 1.28E-05 | 1.04E-04 |
| STAB1      | -0.0853 | 1.01E-01 | 1.87E-01 |

|          |         |          |          |
|----------|---------|----------|----------|
| STAB2    | -0.1405 | 6.71E-03 | 2.10E-02 |
| STAC2    | 0.0881  | 9.00E-02 | 1.71E-01 |
| STAC3    | -0.0284 | 5.86E-01 | 7.01E-01 |
| STAC     | 0.0373  | 4.74E-01 | 6.03E-01 |
| STAG1    | 0.0382  | 4.63E-01 | 5.93E-01 |
| STAG2    | 0.1515  | 3.43E-03 | 1.21E-02 |
| STAG3L1  | 0.0149  | 7.75E-01 | 8.50E-01 |
| STAG3L2  | -0.0321 | 5.37E-01 | 6.59E-01 |
| STAG3L3  | -0.0199 | 7.03E-01 | 7.96E-01 |
| STAG3L4  | 0.1227  | 1.80E-02 | 4.72E-02 |
| STAG3    | -0.1183 | 2.26E-02 | 5.69E-02 |
| STAM2    | 0.0110  | 8.33E-01 | 8.91E-01 |
| STAMBPL1 | 0.0599  | 2.50E-01 | 3.75E-01 |
| STAMP    | -0.0030 | 9.53E-01 | 9.71E-01 |
| STAM     | 0.1253  | 1.57E-02 | 4.22E-02 |
| STAP1    | 0.0271  | 6.03E-01 | 7.16E-01 |
| STAP2    | -0.1155 | 2.60E-02 | 6.37E-02 |
| STARD10  | -0.2271 | 9.98E-06 | 8.40E-05 |
| STARD13  | -0.1308 | 1.17E-02 | 3.31E-02 |
| STARD3NL | 0.1325  | 1.06E-02 | 3.06E-02 |
| STARD3   | 0.1170  | 2.42E-02 | 6.00E-02 |
| STARD4   | -0.0900 | 8.34E-02 | 1.61E-01 |
| STARD5   | -0.2968 | 5.57E-09 | 1.10E-07 |
| STARD6   | 0.1156  | 2.60E-02 | 6.36E-02 |
| STARD7   | 0.0354  | 4.96E-01 | 6.22E-01 |
| STARD8   | -0.0332 | 5.24E-01 | 6.48E-01 |
| STAR     | 0.1430  | 5.81E-03 | 1.87E-02 |
| STAT1    | 0.0727  | 1.62E-01 | 2.69E-01 |
| STAT2    | -0.1052 | 4.29E-02 | 9.53E-02 |
| STAT3    | -0.0791 | 1.28E-01 | 2.25E-01 |
| STAT4    | 0.0430  | 4.09E-01 | 5.42E-01 |
| STAT5A   | -0.0666 | 2.00E-01 | 3.17E-01 |
| STAT5B   | -0.0428 | 4.11E-01 | 5.44E-01 |
| STAT6    | -0.0406 | 4.36E-01 | 5.68E-01 |
| STAU1    | -0.0756 | 1.46E-01 | 2.49E-01 |
| STAU2    | -0.0076 | 8.84E-01 | 9.26E-01 |
| STBD1    | -0.2571 | 5.18E-07 | 6.30E-06 |
| STC1     | -0.0761 | 1.43E-01 | 2.45E-01 |
| STC2     | 0.0329  | 5.27E-01 | 6.50E-01 |
| STEAP1   | -0.1690 | 1.09E-03 | 4.61E-03 |
| STEAP2   | -0.0966 | 6.30E-02 | 1.29E-01 |
| STEAP3   | -0.2338 | 5.33E-06 | 4.89E-05 |
| STEAP4   | -0.3102 | 1.02E-09 | 2.40E-08 |
| STH      | 0.0379  | 4.67E-01 | 5.96E-01 |

|              |         |          |          |
|--------------|---------|----------|----------|
| STIL         | 0.4277  | 6.27E-18 | 8.80E-16 |
| STIM1        | -0.0513 | 3.24E-01 | 4.55E-01 |
| STIM2        | 0.1172  | 2.39E-02 | 5.95E-02 |
| STIP1        | 0.3287  | 8.50E-11 | 2.52E-09 |
| STK10        | -0.1030 | 4.73E-02 | 1.03E-01 |
| STK11IP      | 0.2199  | 1.92E-05 | 1.49E-04 |
| STK11        | 0.0023  | 9.64E-01 | 9.78E-01 |
| STK16        | -0.2704 | 1.22E-07 | 1.74E-06 |
| STK17A       | 0.1038  | 4.58E-02 | 1.00E-01 |
| STK17B       | -0.0055 | 9.16E-01 | 9.47E-01 |
| STK19        | 0.2224  | 1.53E-05 | 1.22E-04 |
| STK24        | 0.2662  | 1.95E-07 | 2.65E-06 |
| STK25        | 0.1684  | 1.13E-03 | 4.77E-03 |
| STK31        | 0.1236  | 1.73E-02 | 4.56E-02 |
| STK32A       | -0.0144 | 7.82E-01 | 8.55E-01 |
| STK32B       | 0.0151  | 7.73E-01 | 8.47E-01 |
| STK32C       | 0.0820  | 1.15E-01 | 2.07E-01 |
| STK33        | 0.1263  | 1.50E-02 | 4.06E-02 |
| STK35        | 0.0869  | 9.47E-02 | 1.78E-01 |
| STK36        | 0.1934  | 1.78E-04 | 9.97E-04 |
| STK38L       | 0.0025  | 9.62E-01 | 9.76E-01 |
| STK38        | 0.1731  | 8.14E-04 | 3.60E-03 |
| STK39        | 0.1674  | 1.21E-03 | 5.05E-03 |
| STK3         | 0.0600  | 2.49E-01 | 3.74E-01 |
| STK40        | -0.1273 | 1.42E-02 | 3.89E-02 |
| STK4         | 0.1339  | 9.80E-03 | 2.88E-02 |
| STL          | 0.0788  | 1.30E-01 | 2.27E-01 |
| STMN1        | 0.3654  | 3.70E-13 | 1.78E-11 |
| STMN2        | -0.0075 | 8.86E-01 | 9.27E-01 |
| STMN3        | -0.0535 | 3.04E-01 | 4.33E-01 |
| STMN4        | 0.0234  | 6.54E-01 | 7.56E-01 |
| STOML1       | -0.1349 | 9.26E-03 | 2.75E-02 |
| STOML2       | 0.0585  | 2.61E-01 | 3.87E-01 |
| STOML3       | 0.0158  | 7.61E-01 | 8.39E-01 |
| STOM         | -0.1335 | 1.00E-02 | 2.93E-02 |
| STON1-GTF2A1 | -0.0782 | 1.33E-01 | 2.31E-01 |
| STON1        | -0.0576 | 2.69E-01 | 3.96E-01 |
| STON2        | -0.0927 | 7.46E-02 | 1.48E-01 |
| STOX1        | 0.1633  | 1.60E-03 | 6.41E-03 |
| STOX2        | -0.0063 | 9.04E-01 | 9.40E-01 |
| STRA13       | 0.1214  | 1.94E-02 | 5.00E-02 |
| STRA6        | 0.0860  | 9.81E-02 | 1.83E-01 |
| STRA8        | 0.1111  | 3.25E-02 | 7.62E-02 |
| STRADA       | 0.3632  | 5.19E-13 | 2.44E-11 |

|         |         |          |          |
|---------|---------|----------|----------|
| STRADB  | -0.2309 | 7.01E-06 | 6.18E-05 |
| STRAP   | 0.0298  | 5.68E-01 | 6.85E-01 |
| STRBP   | 0.2226  | 1.51E-05 | 1.21E-04 |
| STRC    | 0.1499  | 3.79E-03 | 1.32E-02 |
| STRN3   | -0.1326 | 1.06E-02 | 3.05E-02 |
| STRN4   | 0.1806  | 4.72E-04 | 2.26E-03 |
| STRN    | -0.0075 | 8.85E-01 | 9.26E-01 |
| STS     | -0.2512 | 9.54E-07 | 1.09E-05 |
| STT3A   | 0.2191  | 2.07E-05 | 1.59E-04 |
| STT3B   | -0.0737 | 1.57E-01 | 2.62E-01 |
| STUB1   | -0.0739 | 1.56E-01 | 2.61E-01 |
| STX10   | 0.0911  | 7.97E-02 | 1.55E-01 |
| STX11   | -0.1007 | 5.26E-02 | 1.12E-01 |
| STX12   | -0.1436 | 5.58E-03 | 1.80E-02 |
| STX16   | 0.2486  | 1.25E-06 | 1.38E-05 |
| STX17   | 0.0142  | 7.86E-01 | 8.58E-01 |
| STX18   | 0.0948  | 6.82E-02 | 1.37E-01 |
| STX19   | -0.0065 | 9.01E-01 | 9.37E-01 |
| STX1A   | 0.2259  | 1.12E-05 | 9.28E-05 |
| STX1B   | -0.0793 | 1.27E-01 | 2.23E-01 |
| STX2    | 0.1824  | 4.12E-04 | 2.03E-03 |
| STX3    | 0.0541  | 2.99E-01 | 4.28E-01 |
| STX4    | 0.1469  | 4.58E-03 | 1.54E-02 |
| STX5    | 0.0030  | 9.54E-01 | 9.72E-01 |
| STX6    | 0.4799  | 9.18E-23 | 3.52E-20 |
| STX7    | 0.0973  | 6.13E-02 | 1.26E-01 |
| STX8    | 0.0109  | 8.35E-01 | 8.92E-01 |
| STXBP1  | -0.0184 | 7.24E-01 | 8.13E-01 |
| STXBP2  | 0.0878  | 9.11E-02 | 1.73E-01 |
| STXBP3  | 0.0158  | 7.61E-01 | 8.39E-01 |
| STXBP4  | 0.1879  | 2.73E-04 | 1.44E-03 |
| STXBP5L | 0.0012  | 9.81E-01 | 9.88E-01 |
| STXBP5  | 0.1610  | 1.86E-03 | 7.25E-03 |
| STXBP6  | 0.1841  | 3.65E-04 | 1.84E-03 |
| STYK1   | 0.0055  | 9.16E-01 | 9.47E-01 |
| STYXL1  | -0.0988 | 5.73E-02 | 1.20E-01 |
| STYX    | -0.1644 | 1.49E-03 | 6.00E-03 |
| SUB1    | 0.2535  | 7.49E-07 | 8.75E-06 |
| SUCLA2  | -0.1244 | 1.65E-02 | 4.40E-02 |
| SUCLG1  | -0.1921 | 1.97E-04 | 1.09E-03 |
| SUCLG2  | -0.4456 | 1.70E-19 | 3.72E-17 |
| SUCNR1  | -0.1477 | 4.36E-03 | 1.47E-02 |
| SUDS3   | 0.1084  | 3.69E-02 | 8.46E-02 |
| SUFU    | -0.1148 | 2.70E-02 | 6.56E-02 |



|         |         |          |          |
|---------|---------|----------|----------|
| SUGT1L1 | 0.0500  | 3.37E-01 | 4.69E-01 |
| SUGT1P1 | 0.0496  | 3.41E-01 | 4.72E-01 |
| SUGT1   | -0.0480 | 3.56E-01 | 4.88E-01 |
| SULF1   | -0.0395 | 4.49E-01 | 5.80E-01 |
| SULF2   | -0.0901 | 8.32E-02 | 1.61E-01 |
| SULT1A1 | -0.1612 | 1.85E-03 | 7.20E-03 |
| SULT1A2 | -0.1790 | 5.34E-04 | 2.51E-03 |
| SULT1A3 | 0.1263  | 1.49E-02 | 4.05E-02 |
| SULT1B1 | -0.2991 | 4.21E-09 | 8.58E-08 |
| SULT1C2 | 0.1410  | 6.53E-03 | 2.06E-02 |
| SULT1C3 | 0.0342  | 5.12E-01 | 6.36E-01 |
| SULT1C4 | 0.0252  | 6.29E-01 | 7.37E-01 |
| SULT1E1 | -0.1129 | 2.97E-02 | 7.09E-02 |
| SULT2A1 | -0.1177 | 2.34E-02 | 5.84E-02 |
| SULT2B1 | -0.0041 | 9.37E-01 | 9.61E-01 |
| SULT4A1 | -0.0721 | 1.66E-01 | 2.74E-01 |
| SULT6B1 | -0.0077 | 8.82E-01 | 9.25E-01 |
| SUMF1   | -0.2374 | 3.77E-06 | 3.64E-05 |
| SUMF2   | -0.1137 | 2.86E-02 | 6.88E-02 |
| SUMO1P1 | 0.0958  | 6.52E-02 | 1.33E-01 |
| SUMO1P3 | 0.0975  | 6.05E-02 | 1.25E-01 |
| SUMO1   | 0.0148  | 7.76E-01 | 8.50E-01 |
| SUMO2   | 0.3461  | 7.03E-12 | 2.62E-10 |
| SUMO3   | -0.0182 | 7.26E-01 | 8.14E-01 |
| SUMO4   | -0.0493 | 3.43E-01 | 4.75E-01 |
| SUN1    | 0.1374  | 8.03E-03 | 2.44E-02 |
| SUN2    | -0.1607 | 1.90E-03 | 7.37E-03 |
| SUN3    | 0.1766  | 6.32E-04 | 2.90E-03 |
| SUOX    | -0.3050 | 2.00E-09 | 4.46E-08 |
| SUPT16H | 0.2610  | 3.43E-07 | 4.40E-06 |
| SUPT3H  | 0.2438  | 2.02E-06 | 2.11E-05 |
| SUPT4H1 | 0.2656  | 2.08E-07 | 2.80E-06 |
| SUPT5H  | 0.2693  | 1.39E-07 | 1.96E-06 |
| SUPT6H  | 0.1353  | 9.08E-03 | 2.71E-02 |
| SUPT7L  | 0.2156  | 2.81E-05 | 2.07E-04 |
| SUPV3L1 | 0.0272  | 6.01E-01 | 7.14E-01 |
| SURF1   | -0.1323 | 1.08E-02 | 3.10E-02 |
| SURF2   | 0.1175  | 2.36E-02 | 5.87E-02 |
| SURF4   | -0.0412 | 4.29E-01 | 5.61E-01 |
| SURF6   | 0.2298  | 7.78E-06 | 6.73E-05 |
| SUSD1   | 0.1250  | 1.60E-02 | 4.28E-02 |
| SUSD2   | -0.1250 | 1.60E-02 | 4.29E-02 |
| SUSD3   | -0.0484 | 3.53E-01 | 4.85E-01 |
| SUSD4   | 0.2853  | 2.24E-08 | 3.82E-07 |

|          |         |          |          |
|----------|---------|----------|----------|
| SUSD5    | -0.0239 | 6.46E-01 | 7.51E-01 |
| SUV39H1  | 0.2037  | 7.75E-05 | 4.92E-04 |
| SUV39H2  | 0.3999  | 1.11E-15 | 8.85E-14 |
| SUV420H1 | -0.0366 | 4.83E-01 | 6.11E-01 |
| SUV420H2 | 0.2459  | 1.64E-06 | 1.75E-05 |
| SUZ12P   | 0.4063  | 3.51E-16 | 3.11E-14 |
| SUZ12    | 0.2912  | 1.11E-08 | 2.03E-07 |
| SV2A     | 0.1063  | 4.06E-02 | 9.13E-02 |
| SV2B     | 0.0464  | 3.73E-01 | 5.06E-01 |
| SV2C     | 0.0449  | 3.89E-01 | 5.22E-01 |
| SVEP1    | -0.1206 | 2.02E-02 | 5.17E-02 |
| SVIL     | 0.0381  | 4.64E-01 | 5.94E-01 |
| SVIP     | 0.1478  | 4.32E-03 | 1.46E-02 |
| SVOPL    | 0.1776  | 5.88E-04 | 2.72E-03 |
| SVOP     | 0.0852  | 1.01E-01 | 1.87E-01 |
| SWAP70   | 0.0446  | 3.91E-01 | 5.24E-01 |
| SYAP1    | -0.1161 | 2.54E-02 | 6.22E-02 |
| SYBU     | -0.2080 | 5.40E-05 | 3.61E-04 |
| SYCE1L   | 0.1425  | 5.96E-03 | 1.91E-02 |
| SYCE1    | 0.0273  | 6.00E-01 | 7.13E-01 |
| SYCE2    | 0.0239  | 6.46E-01 | 7.51E-01 |
| SYCN     | 0.0090  | 8.63E-01 | 9.12E-01 |
| SYCP1    | 0.0805  | 1.22E-01 | 2.16E-01 |
| SYCP2L   | -0.0133 | 7.99E-01 | 8.67E-01 |
| SYCP2    | 0.1535  | 3.03E-03 | 1.09E-02 |
| SYCP3    | 0.0536  | 3.03E-01 | 4.33E-01 |
| SYDE1    | 0.0164  | 7.53E-01 | 8.34E-01 |
| SYDE2    | 0.0153  | 7.69E-01 | 8.45E-01 |
| SYF2     | 0.0201  | 7.00E-01 | 7.93E-01 |
| SYK      | 0.0320  | 5.38E-01 | 6.60E-01 |
| SYMPK    | 0.0697  | 1.80E-01 | 2.92E-01 |
| SYN1     | 0.0342  | 5.11E-01 | 6.36E-01 |
| SYN2     | -0.0601 | 2.48E-01 | 3.73E-01 |
| SYN3     | 0.0361  | 4.88E-01 | 6.16E-01 |
| SYNCRIP  | 0.2084  | 5.22E-05 | 3.52E-04 |
| SYNC     | 0.1054  | 4.24E-02 | 9.44E-02 |
| SYNE1    | -0.0939 | 7.08E-02 | 1.42E-01 |
| SYNE2    | -0.0889 | 8.74E-02 | 1.67E-01 |
| SYNGAP1  | 0.0053  | 9.20E-01 | 9.49E-01 |
| SYNGR1   | 0.0765  | 1.41E-01 | 2.42E-01 |
| SYNGR2   | 0.1723  | 8.61E-04 | 3.78E-03 |
| SYNGR3   | 0.0627  | 2.29E-01 | 3.51E-01 |
| SYNGR4   | 0.1716  | 9.03E-04 | 3.94E-03 |
| SYNJ1    | 0.0509  | 3.28E-01 | 4.59E-01 |

|             |         |          |          |
|-------------|---------|----------|----------|
| SYNJ2BP     | -0.2420 | 2.42E-06 | 2.46E-05 |
| SYNJ2       | 0.1866  | 3.01E-04 | 1.56E-03 |
| SYNM        | 0.1051  | 4.30E-02 | 9.55E-02 |
| SYNPO2L     | -0.0310 | 5.52E-01 | 6.72E-01 |
| SYNPO2      | -0.2667 | 1.85E-07 | 2.53E-06 |
| SYNPO       | -0.1546 | 2.84E-03 | 1.03E-02 |
| SYNPR       | -0.0193 | 7.11E-01 | 8.02E-01 |
| SYNRG       | 0.1169  | 2.43E-02 | 6.02E-02 |
| SYPL1       | -0.1183 | 2.27E-02 | 5.70E-02 |
| SYPL2       | -0.1931 | 1.82E-04 | 1.02E-03 |
| SYP         | 0.0709  | 1.73E-01 | 2.83E-01 |
| SYS1-DBNDD2 | 0.0001  | 9.99E-01 | 1.00E+00 |
| SYS1        | -0.1360 | 8.71E-03 | 2.61E-02 |
| SYT10       | -0.0851 | 1.02E-01 | 1.88E-01 |
| SYT11       | -0.0690 | 1.85E-01 | 2.98E-01 |
| SYT12       | 0.0478  | 3.59E-01 | 4.91E-01 |
| SYT13       | 0.0738  | 1.56E-01 | 2.61E-01 |
| SYT14L      | 0.0053  | 9.19E-01 | 9.49E-01 |
| SYT14       | 0.0263  | 6.13E-01 | 7.24E-01 |
| SYT15       | -0.0553 | 2.88E-01 | 4.17E-01 |
| SYT16       | 0.1228  | 1.80E-02 | 4.71E-02 |
| SYT17       | -0.0376 | 4.70E-01 | 6.00E-01 |
| SYT1        | 0.0272  | 6.01E-01 | 7.14E-01 |
| SYT2        | 0.0994  | 5.59E-02 | 1.17E-01 |
| SYT3        | 0.0015  | 9.77E-01 | 9.86E-01 |
| SYT4        | 0.0030  | 9.55E-01 | 9.72E-01 |
| SYT5        | 0.1807  | 4.69E-04 | 2.25E-03 |
| SYT6        | 0.0423  | 4.17E-01 | 5.49E-01 |
| SYT7        | -0.0919 | 7.72E-02 | 1.52E-01 |
| SYT8        | 0.1980  | 1.24E-04 | 7.32E-04 |
| SYT9        | -0.1839 | 3.70E-04 | 1.86E-03 |
| SYTL1       | 0.0437  | 4.01E-01 | 5.34E-01 |
| SYTL2       | -0.1163 | 2.51E-02 | 6.17E-02 |
| SYTL3       | -0.0413 | 4.28E-01 | 5.60E-01 |
| SYTL4       | -0.0431 | 4.08E-01 | 5.40E-01 |
| SYTL5       | -0.2622 | 3.02E-07 | 3.92E-06 |
| SYVN1       | -0.1241 | 1.68E-02 | 4.46E-02 |
| TAAR1       | 0.0009  | 9.86E-01 | 9.92E-01 |
| TAAR5       | 0.0004  | 9.94E-01 | 9.96E-01 |
| TAAR6       | 0.0898  | 8.41E-02 | 1.62E-01 |
| TAAR8       | 0.0683  | 1.89E-01 | 3.03E-01 |
| TAAR9       | 0.0982  | 5.89E-02 | 1.22E-01 |
| TAB1        | 0.1435  | 5.63E-03 | 1.82E-02 |
| TAB2        | 0.0213  | 6.82E-01 | 7.79E-01 |

|         |         |          |          |
|---------|---------|----------|----------|
| TAB3    | -0.0508 | 3.29E-01 | 4.60E-01 |
| TAC1    | -0.0133 | 7.98E-01 | 8.66E-01 |
| TAC3    | 0.1612  | 1.84E-03 | 7.19E-03 |
| TAC4    | -0.0129 | 8.04E-01 | 8.70E-01 |
| TACC1   | -0.0331 | 5.25E-01 | 6.48E-01 |
| TACC2   | -0.0508 | 3.29E-01 | 4.60E-01 |
| TACC3   | 0.3926  | 4.01E-15 | 2.83E-13 |
| TACO1   | -0.1213 | 1.94E-02 | 5.01E-02 |
| TACR1   | -0.1843 | 3.59E-04 | 1.81E-03 |
| TACR2   | 0.0487  | 3.50E-01 | 4.82E-01 |
| TACR3   | 0.0648  | 2.13E-01 | 3.33E-01 |
| TACSTD2 | 0.0114  | 8.27E-01 | 8.87E-01 |
| TADA1   | 0.1876  | 2.79E-04 | 1.47E-03 |
| TADA2A  | 0.2124  | 3.73E-05 | 2.64E-04 |
| TADA2B  | -0.1133 | 2.91E-02 | 6.98E-02 |
| TADA3   | -0.1341 | 9.72E-03 | 2.86E-02 |
| TAF10   | -0.0881 | 9.02E-02 | 1.71E-01 |
| TAF11   | 0.2376  | 3.69E-06 | 3.57E-05 |
| TAF12   | 0.0946  | 6.86E-02 | 1.38E-01 |
| TAF13   | -0.1102 | 3.39E-02 | 7.90E-02 |
| TAF15   | 0.3078  | 1.39E-09 | 3.21E-08 |
| TAF1A   | 0.2796  | 4.34E-08 | 6.89E-07 |
| TAF1B   | 0.1561  | 2.58E-03 | 9.50E-03 |
| TAF1C   | 0.0453  | 3.85E-01 | 5.18E-01 |
| TAF1D   | 0.2154  | 2.86E-05 | 2.10E-04 |
| TAF1L   | 0.0041  | 9.37E-01 | 9.61E-01 |
| TAF1    | 0.1092  | 3.55E-02 | 8.19E-02 |
| TAF2    | 0.0129  | 8.04E-01 | 8.70E-01 |
| TAF3    | 0.1961  | 1.44E-04 | 8.34E-04 |
| TAF4B   | 0.0163  | 7.54E-01 | 8.35E-01 |
| TAF4    | 0.2660  | 1.98E-07 | 2.69E-06 |
| TAF5L   | 0.1994  | 1.10E-04 | 6.59E-04 |
| TAF5    | 0.2058  | 6.51E-05 | 4.23E-04 |
| TAF6L   | -0.0276 | 5.96E-01 | 7.10E-01 |
| TAF6    | 0.2224  | 1.53E-05 | 1.22E-04 |
| TAF7L   | -0.0692 | 1.84E-01 | 2.96E-01 |
| TAF7    | 0.1504  | 3.69E-03 | 1.29E-02 |
| TAF8    | -0.0270 | 6.04E-01 | 7.16E-01 |
| TAF9B   | 0.1767  | 6.29E-04 | 2.89E-03 |
| TAF9    | 0.0811  | 1.19E-01 | 2.13E-01 |
| TAGAP   | -0.0742 | 1.54E-01 | 2.59E-01 |
| TAGLN2  | 0.1803  | 4.83E-04 | 2.31E-03 |
| TAGLN3  | 0.1214  | 1.94E-02 | 5.00E-02 |
| TAGLN   | -0.1518 | 3.38E-03 | 1.19E-02 |

|         |         |          |          |
|---------|---------|----------|----------|
| TAL1    | -0.2328 | 5.84E-06 | 5.28E-05 |
| TAL2    | 0.1514  | 3.46E-03 | 1.22E-02 |
| TALDO1  | 0.0382  | 4.63E-01 | 5.94E-01 |
| TANC1   | -0.0157 | 7.63E-01 | 8.40E-01 |
| TANC2   | 0.0762  | 1.43E-01 | 2.45E-01 |
| TANK    | -0.0673 | 1.96E-01 | 3.11E-01 |
| TAOK1   | 0.0006  | 9.91E-01 | 9.95E-01 |
| TAOK2   | -0.0053 | 9.19E-01 | 9.49E-01 |
| TAOK3   | -0.0252 | 6.28E-01 | 7.36E-01 |
| TAP1    | 0.1151  | 2.66E-02 | 6.49E-02 |
| TAP2    | 0.0195  | 7.08E-01 | 8.00E-01 |
| TAPBPL  | -0.1768 | 6.25E-04 | 2.88E-03 |
| TAPBP   | -0.0406 | 4.36E-01 | 5.68E-01 |
| TAPT1   | -0.2068 | 6.01E-05 | 3.95E-04 |
| TARBP1  | 0.2866  | 1.92E-08 | 3.33E-07 |
| TARBP2  | -0.0234 | 6.54E-01 | 7.56E-01 |
| TARDBP  | 0.2845  | 2.44E-08 | 4.10E-07 |
| TARM1   | -0.0245 | 6.39E-01 | 7.45E-01 |
| TARP    | -0.1428 | 5.86E-03 | 1.88E-02 |
| TARS2   | 0.1598  | 2.02E-03 | 7.75E-03 |
| TARSL2  | -0.0565 | 2.78E-01 | 4.07E-01 |
| TARS    | 0.1188  | 2.21E-02 | 5.57E-02 |
| TAS1R1  | -0.0674 | 1.95E-01 | 3.11E-01 |
| TAS1R2  | 0.0870  | 9.44E-02 | 1.78E-01 |
| TAS1R3  | 0.0518  | 3.20E-01 | 4.50E-01 |
| TAS2R10 | 0.0862  | 9.75E-02 | 1.82E-01 |
| TAS2R13 | 0.0595  | 2.53E-01 | 3.78E-01 |
| TAS2R14 | 0.0917  | 7.76E-02 | 1.52E-01 |
| TAS2R19 | 0.1073  | 3.89E-02 | 8.81E-02 |
| TAS2R1  | 0.1420  | 6.14E-03 | 1.95E-02 |
| TAS2R20 | 0.2017  | 9.14E-05 | 5.65E-04 |
| TAS2R30 | 0.0287  | 5.82E-01 | 6.98E-01 |
| TAS2R31 | 0.1158  | 2.57E-02 | 6.31E-02 |
| TAS2R38 | 0.1563  | 2.53E-03 | 9.35E-03 |
| TAS2R3  | 0.0688  | 1.86E-01 | 2.99E-01 |
| TAS2R40 | -0.0599 | 2.50E-01 | 3.75E-01 |
| TAS2R42 | 0.0084  | 8.72E-01 | 9.18E-01 |
| TAS2R43 | 0.1427  | 5.90E-03 | 1.89E-02 |
| TAS2R46 | 0.1030  | 4.75E-02 | 1.03E-01 |
| TAS2R4  | 0.1859  | 3.18E-04 | 1.64E-03 |
| TAS2R50 | -0.0276 | 5.97E-01 | 7.10E-01 |
| TAS2R5  | 0.1267  | 1.46E-02 | 3.98E-02 |
| TAS2R60 | -0.0063 | 9.04E-01 | 9.39E-01 |
| TAS2R8  | -0.0235 | 6.52E-01 | 7.55E-01 |

|          |         |          |          |
|----------|---------|----------|----------|
| TAS2R9   | 0.1014  | 5.11E-02 | 1.09E-01 |
| TASP1    | 0.1039  | 4.56E-02 | 1.00E-01 |
| TATDN1   | 0.0979  | 5.95E-02 | 1.23E-01 |
| TATDN2   | 0.1274  | 1.41E-02 | 3.87E-02 |
| TATDN3   | 0.0151  | 7.72E-01 | 8.47E-01 |
| TAT      | -0.3183 | 3.52E-10 | 9.35E-09 |
| TAX1BP1  | -0.0867 | 9.55E-02 | 1.79E-01 |
| TAX1BP3  | 0.0589  | 2.58E-01 | 3.84E-01 |
| TAZ      | 0.2132  | 3.48E-05 | 2.49E-04 |
| TBC1D10A | -0.0516 | 3.21E-01 | 4.52E-01 |
| TBC1D10B | 0.1916  | 2.05E-04 | 1.13E-03 |
| TBC1D10C | -0.0263 | 6.14E-01 | 7.24E-01 |
| TBC1D12  | 0.0819  | 1.15E-01 | 2.08E-01 |
| TBC1D13  | 0.2333  | 5.60E-06 | 5.10E-05 |
| TBC1D14  | 0.1368  | 8.31E-03 | 2.51E-02 |
| TBC1D15  | -0.0902 | 8.28E-02 | 1.60E-01 |
| TBC1D16  | 0.0282  | 5.89E-01 | 7.04E-01 |
| TBC1D17  | 0.0078  | 8.81E-01 | 9.24E-01 |
| TBC1D19  | -0.0111 | 8.31E-01 | 8.89E-01 |
| TBC1D1   | 0.0581  | 2.64E-01 | 3.91E-01 |
| TBC1D20  | -0.0708 | 1.74E-01 | 2.84E-01 |
| TBC1D21  | -0.0232 | 6.56E-01 | 7.58E-01 |
| TBC1D22A | 0.0016  | 9.76E-01 | 9.85E-01 |
| TBC1D22B | 0.3072  | 1.51E-09 | 3.46E-08 |
| TBC1D23  | -0.1385 | 7.55E-03 | 2.32E-02 |
| TBC1D24  | -0.0594 | 2.54E-01 | 3.79E-01 |
| TBC1D25  | 0.0513  | 3.24E-01 | 4.55E-01 |
| TBC1D26  | 0.0979  | 5.97E-02 | 1.24E-01 |
| TBC1D28  | 0.0106  | 8.39E-01 | 8.94E-01 |
| TBC1D29  | 0.0061  | 9.07E-01 | 9.41E-01 |
| TBC1D2B  | -0.1307 | 1.17E-02 | 3.33E-02 |
| TBC1D2   | -0.0713 | 1.71E-01 | 2.80E-01 |
| TBC1D3B  | 0.3116  | 8.50E-10 | 2.05E-08 |
| TBC1D3C  | 0.2116  | 3.99E-05 | 2.79E-04 |
| TBC1D3G  | 0.0235  | 6.52E-01 | 7.55E-01 |
| TBC1D3H  | 0.2118  | 3.91E-05 | 2.74E-04 |
| TBC1D3P2 | 0.0983  | 5.85E-02 | 1.22E-01 |
| TBC1D3   | 0.3280  | 9.33E-11 | 2.74E-09 |
| TBC1D4   | -0.1205 | 2.03E-02 | 5.19E-02 |
| TBC1D5   | -0.0662 | 2.04E-01 | 3.21E-01 |
| TBC1D7   | 0.0113  | 8.29E-01 | 8.88E-01 |
| TBC1D8B  | -0.0627 | 2.29E-01 | 3.51E-01 |
| TBC1D8   | 0.0871  | 9.38E-02 | 1.77E-01 |
| TBC1D9B  | -0.1340 | 9.76E-03 | 2.87E-02 |

|         |         |          |          |
|---------|---------|----------|----------|
| TBC1D9  | -0.1093 | 3.54E-02 | 8.17E-02 |
| TBCA    | 0.0006  | 9.91E-01 | 9.94E-01 |
| TBCB    | 0.1039  | 4.56E-02 | 1.00E-01 |
| TBCCD1  | 0.0574  | 2.70E-01 | 3.98E-01 |
| TBCC    | 0.2302  | 7.47E-06 | 6.52E-05 |
| TBCD    | 0.0887  | 8.80E-02 | 1.68E-01 |
| TBCEL   | -0.0095 | 8.55E-01 | 9.06E-01 |
| TBCE    | 0.2153  | 2.90E-05 | 2.13E-04 |
| TBCK    | -0.1993 | 1.11E-04 | 6.68E-04 |
| TBK1    | 0.0166  | 7.49E-01 | 8.31E-01 |
| TBKBP1  | 0.0366  | 4.82E-01 | 6.11E-01 |
| TBL1XR1 | 0.1757  | 6.77E-04 | 3.08E-03 |
| TBL1X   | -0.1669 | 1.26E-03 | 5.22E-03 |
| TBL1Y   | -0.0411 | 4.30E-01 | 5.62E-01 |
| TBL2    | -0.0371 | 4.77E-01 | 6.05E-01 |
| TBL3    | 0.0003  | 9.95E-01 | 9.97E-01 |
| TBPL1   | 0.2024  | 8.61E-05 | 5.37E-04 |
| TBPL2   | 0.0363  | 4.86E-01 | 6.14E-01 |
| TBP     | 0.3935  | 3.46E-15 | 2.47E-13 |
| TBR1    | 0.1681  | 1.15E-03 | 4.86E-03 |
| TBRG1   | -0.0790 | 1.29E-01 | 2.25E-01 |
| TBRG4   | -0.0376 | 4.70E-01 | 6.00E-01 |
| TBX10   | -0.0247 | 6.36E-01 | 7.43E-01 |
| TBX15   | -0.0832 | 1.09E-01 | 2.00E-01 |
| TBX18   | 0.1095  | 3.50E-02 | 8.10E-02 |
| TBX19   | 0.4003  | 1.04E-15 | 8.40E-14 |
| TBX1    | 0.0739  | 1.55E-01 | 2.60E-01 |
| TBX20   | -0.1695 | 1.05E-03 | 4.47E-03 |
| TBX21   | -0.0924 | 7.53E-02 | 1.49E-01 |
| TBX22   | -0.0135 | 7.96E-01 | 8.65E-01 |
| TBX2    | -0.0402 | 4.40E-01 | 5.72E-01 |
| TBX3    | -0.1342 | 9.68E-03 | 2.85E-02 |
| TBX4    | 0.1431  | 5.76E-03 | 1.85E-02 |
| TBX5    | 0.0391  | 4.53E-01 | 5.84E-01 |
| TBX6    | 0.0524  | 3.14E-01 | 4.44E-01 |
| TBXA2R  | -0.1631 | 1.62E-03 | 6.47E-03 |
| TBXAS1  | -0.0918 | 7.73E-02 | 1.52E-01 |
| TC2N    | 0.0586  | 2.61E-01 | 3.87E-01 |
| TCAM1P  | 0.0814  | 1.18E-01 | 2.11E-01 |
| TCAP    | 0.0182  | 7.26E-01 | 8.14E-01 |
| TCEA1   | -0.0203 | 6.97E-01 | 7.91E-01 |
| TCEA2   | -0.1211 | 1.96E-02 | 5.06E-02 |
| TCEA3   | 0.0151  | 7.72E-01 | 8.47E-01 |
| TCEAL1  | 0.0649  | 2.12E-01 | 3.32E-01 |

|         |         |          |          |
|---------|---------|----------|----------|
| TCEAL2  | 0.0188  | 7.19E-01 | 8.09E-01 |
| TCEAL3  | 0.0715  | 1.69E-01 | 2.78E-01 |
| TCEAL4  | 0.0360  | 4.89E-01 | 6.16E-01 |
| TCEAL5  | 0.1150  | 2.68E-02 | 6.52E-02 |
| TCEAL6  | 0.0707  | 1.74E-01 | 2.85E-01 |
| TCEAL7  | 0.0024  | 9.63E-01 | 9.77E-01 |
| TCEAL8  | 0.1817  | 4.35E-04 | 2.11E-03 |
| TCEANC  | 0.0446  | 3.92E-01 | 5.25E-01 |
| TCEB1   | 0.0780  | 1.34E-01 | 2.32E-01 |
| TCEB2   | 0.0263  | 6.14E-01 | 7.24E-01 |
| TCEB3B  | 0.0685  | 1.88E-01 | 3.01E-01 |
| TCEB3C  | 0.0085  | 8.71E-01 | 9.17E-01 |
| TCEB3   | -0.0757 | 1.46E-01 | 2.48E-01 |
| TCERG1L | -0.0239 | 6.47E-01 | 7.51E-01 |
| TCERG1  | 0.3326  | 4.91E-11 | 1.55E-09 |
| TCF12   | -0.0213 | 6.82E-01 | 7.79E-01 |
| TCF15   | -0.0592 | 2.55E-01 | 3.81E-01 |
| TCF19   | 0.4345  | 1.62E-18 | 2.71E-16 |
| TCF20   | 0.1767  | 6.29E-04 | 2.89E-03 |
| TCF21   | -0.1452 | 5.06E-03 | 1.67E-02 |
| TCF23   | -0.1127 | 3.01E-02 | 7.15E-02 |
| TCF25   | -0.2854 | 2.21E-08 | 3.78E-07 |
| TCF3    | 0.2743  | 7.89E-08 | 1.18E-06 |
| TCF4    | -0.1917 | 2.03E-04 | 1.12E-03 |
| TCF7L1  | 0.1213  | 1.94E-02 | 5.01E-02 |
| TCF7L2  | 0.0440  | 3.98E-01 | 5.31E-01 |
| TCF7    | 0.0815  | 1.17E-01 | 2.11E-01 |
| TCFL5   | 0.1204  | 2.04E-02 | 5.22E-02 |
| TCHHL1  | 0.0141  | 7.87E-01 | 8.59E-01 |
| TCHH    | -0.1451 | 5.10E-03 | 1.68E-02 |
| TCHP    | 0.2424  | 2.32E-06 | 2.37E-05 |
| TCIRG1  | 0.1868  | 2.98E-04 | 1.55E-03 |
| TCL1A   | 0.0194  | 7.09E-01 | 8.01E-01 |
| TCL1B   | 0.2336  | 5.46E-06 | 4.99E-05 |
| TCL6    | 0.1611  | 1.86E-03 | 7.24E-03 |
| TCN1    | -0.0362 | 4.87E-01 | 6.15E-01 |
| TCN2    | -0.0138 | 7.91E-01 | 8.61E-01 |
| TCOF1   | 0.3136  | 6.56E-10 | 1.61E-08 |
| TCP10L2 | 0.1085  | 3.66E-02 | 8.41E-02 |
| TCP10L  | -0.0746 | 1.51E-01 | 2.55E-01 |
| TCP10   | 0.1163  | 2.51E-02 | 6.17E-02 |
| TCP11L1 | -0.0271 | 6.02E-01 | 7.15E-01 |
| TCP11L2 | -0.1013 | 5.12E-02 | 1.10E-01 |
| TCP11   | -0.1292 | 1.27E-02 | 3.56E-02 |



|          |         |          |          |
|----------|---------|----------|----------|
| TCP1     | 0.2567  | 5.37E-07 | 6.52E-06 |
| TCTA     | -0.1051 | 4.31E-02 | 9.57E-02 |
| TCTE1    | 0.0228  | 6.61E-01 | 7.63E-01 |
| TCTE3    | 0.2817  | 3.40E-08 | 5.54E-07 |
| TCTEX1D1 | -0.0327 | 5.30E-01 | 6.53E-01 |
| TCTEX1D2 | 0.2862  | 2.01E-08 | 3.47E-07 |
| TCTEX1D4 | -0.0992 | 5.63E-02 | 1.18E-01 |
| TCTN1    | 0.0201  | 6.99E-01 | 7.92E-01 |
| TCTN2    | 0.2959  | 6.20E-09 | 1.21E-07 |
| TCTN3    | -0.2788 | 4.77E-08 | 7.48E-07 |
| TDGF1    | -0.0851 | 1.02E-01 | 1.88E-01 |
| TDGF3    | -0.0990 | 5.68E-02 | 1.19E-01 |
| TDG      | 0.2463  | 1.57E-06 | 1.69E-05 |
| TDH      | 0.1007  | 5.26E-02 | 1.12E-01 |
| TDO2     | -0.1524 | 3.25E-03 | 1.15E-02 |
| TDP1     | 0.1765  | 6.40E-04 | 2.93E-03 |
| TDP2     | -0.0136 | 7.94E-01 | 8.63E-01 |
| TDRD10   | 0.1712  | 9.32E-04 | 4.05E-03 |
| TDRD12   | 0.0477  | 3.59E-01 | 4.92E-01 |
| TDRD1    | 0.0972  | 6.14E-02 | 1.26E-01 |
| TDRD3    | -0.0771 | 1.38E-01 | 2.38E-01 |
| TDRD5    | 0.2660  | 1.99E-07 | 2.70E-06 |
| TDRD6    | -0.0691 | 1.84E-01 | 2.96E-01 |
| TDRD7    | 0.1793  | 5.22E-04 | 2.47E-03 |
| TDRD9    | 0.0165  | 7.52E-01 | 8.33E-01 |
| TDRG1    | 0.0487  | 3.50E-01 | 4.82E-01 |
| TDRKH    | 0.4367  | 1.05E-18 | 1.88E-16 |
| TEAD1    | -0.0306 | 5.57E-01 | 6.76E-01 |
| TEAD2    | 0.1605  | 1.93E-03 | 7.46E-03 |
| TEAD3    | 0.2805  | 3.89E-08 | 6.25E-07 |
| TEAD4    | 0.0345  | 5.07E-01 | 6.32E-01 |
| TECPR1   | -0.1191 | 2.17E-02 | 5.50E-02 |
| TECPR2   | -0.1893 | 2.45E-04 | 1.31E-03 |
| TECRL    | -0.0028 | 9.57E-01 | 9.73E-01 |
| TECR     | -0.0447 | 3.90E-01 | 5.24E-01 |
| TECTA    | -0.0502 | 3.35E-01 | 4.67E-01 |
| TECTB    | -0.0235 | 6.52E-01 | 7.55E-01 |
| TEC      | -0.1193 | 2.16E-02 | 5.46E-02 |
| TEDDM1   | 0.0827  | 1.12E-01 | 2.03E-01 |
| TEF      | 0.0052  | 9.21E-01 | 9.50E-01 |
| TEKT1    | -0.1222 | 1.85E-02 | 4.83E-02 |
| TEKT2    | 0.1571  | 2.41E-03 | 8.98E-03 |
| TEKT3    | 0.0022  | 9.67E-01 | 9.80E-01 |
| TEKT4    | -0.0033 | 9.49E-01 | 9.68E-01 |

|         |         |          |          |
|---------|---------|----------|----------|
| TEKT5   | -0.0109 | 8.35E-01 | 8.92E-01 |
| TEK     | -0.2623 | 2.98E-07 | 3.89E-06 |
| TELO2   | 0.1780  | 5.71E-04 | 2.66E-03 |
| TENC1   | -0.1704 | 9.85E-04 | 4.24E-03 |
| TEP1    | -0.0053 | 9.19E-01 | 9.49E-01 |
| TEPP    | -0.0310 | 5.51E-01 | 6.71E-01 |
| TERC    | 0.1004  | 5.33E-02 | 1.13E-01 |
| TERF1   | -0.0538 | 3.02E-01 | 4.31E-01 |
| TERF2IP | -0.2438 | 2.02E-06 | 2.11E-05 |
| TERF2   | -0.1762 | 6.50E-04 | 2.97E-03 |
| TERT    | 0.1788  | 5.39E-04 | 2.54E-03 |
| TESC    | 0.0859  | 9.84E-02 | 1.84E-01 |
| TESK1   | 0.1575  | 2.34E-03 | 8.77E-03 |
| TESK2   | -0.0379 | 4.67E-01 | 5.97E-01 |
| TES     | 0.0351  | 5.01E-01 | 6.26E-01 |
| TET1    | 0.2353  | 4.62E-06 | 4.35E-05 |
| TET2    | -0.0410 | 4.31E-01 | 5.63E-01 |
| TET3    | 0.1900  | 2.33E-04 | 1.26E-03 |
| TEX101  | -0.0218 | 6.75E-01 | 7.74E-01 |
| TEX10   | 0.2829  | 2.97E-08 | 4.89E-07 |
| TEX11   | 0.0479  | 3.57E-01 | 4.89E-01 |
| TEX12   | 0.0827  | 1.12E-01 | 2.03E-01 |
| TEX13A  | -0.0066 | 8.99E-01 | 9.36E-01 |
| TEX13B  | 0.0262  | 6.15E-01 | 7.25E-01 |
| TEX14   | 0.1848  | 3.45E-04 | 1.76E-03 |
| TEX15   | 0.0696  | 1.81E-01 | 2.93E-01 |
| TEX19   | 0.2321  | 6.26E-06 | 5.62E-05 |
| TEX261  | 0.0283  | 5.87E-01 | 7.02E-01 |
| TEX264  | -0.2157 | 2.80E-05 | 2.06E-04 |
| TEX2    | 0.0743  | 1.53E-01 | 2.58E-01 |
| TEX9    | 0.0924  | 7.55E-02 | 1.49E-01 |
| TFAMP1  | 0.1861  | 3.12E-04 | 1.62E-03 |
| TFAM    | 0.0377  | 4.69E-01 | 5.99E-01 |
| TFAP2A  | 0.2025  | 8.60E-05 | 5.36E-04 |
| TFAP2B  | 0.1459  | 4.85E-03 | 1.61E-02 |
| TFAP2C  | 0.1115  | 3.18E-02 | 7.49E-02 |
| TFAP2D  | 0.0213  | 6.82E-01 | 7.79E-01 |
| TFAP2E  | 0.2573  | 5.04E-07 | 6.16E-06 |
| TFAP4   | 0.3305  | 6.60E-11 | 2.01E-09 |
| TFB1M   | -0.0081 | 8.76E-01 | 9.20E-01 |
| TFB2M   | -0.0050 | 9.23E-01 | 9.51E-01 |
| TFCP2L1 | 0.1171  | 2.41E-02 | 5.97E-02 |
| TFCP2   | 0.1104  | 3.36E-02 | 7.84E-02 |
| TFDP1   | 0.2955  | 6.53E-09 | 1.27E-07 |

|          |         |          |          |
|----------|---------|----------|----------|
| TFDP2    | 0.1390  | 7.32E-03 | 2.26E-02 |
| TFDP3    | -0.0765 | 1.41E-01 | 2.42E-01 |
| TFE3     | 0.1846  | 3.51E-04 | 1.78E-03 |
| TFEB     | 0.0235  | 6.52E-01 | 7.55E-01 |
| TFEC     | -0.0571 | 2.72E-01 | 4.00E-01 |
| TFF1     | 0.0360  | 4.89E-01 | 6.16E-01 |
| TFF2     | 0.1215  | 1.93E-02 | 4.98E-02 |
| TFF3     | 0.0171  | 7.42E-01 | 8.26E-01 |
| TFG      | -0.0001 | 9.99E-01 | 1.00E+00 |
| TFIP11   | 0.1767  | 6.27E-04 | 2.88E-03 |
| TFPI2    | -0.0367 | 4.81E-01 | 6.10E-01 |
| TFPI     | -0.1260 | 1.51E-02 | 4.10E-02 |
| TFPT     | 0.1327  | 1.05E-02 | 3.04E-02 |
| TFR2     | -0.1889 | 2.53E-04 | 1.35E-03 |
| TFRC     | 0.1268  | 1.46E-02 | 3.98E-02 |
| TF       | -0.0585 | 2.61E-01 | 3.88E-01 |
| TGDS     | 0.0453  | 3.84E-01 | 5.17E-01 |
| TGFA     | 0.1255  | 1.56E-02 | 4.19E-02 |
| TGFB111  | -0.0660 | 2.05E-01 | 3.22E-01 |
| TGFB1    | -0.0332 | 5.24E-01 | 6.47E-01 |
| TGFB2    | 0.0182  | 7.27E-01 | 8.15E-01 |
| TGFB3    | -0.1005 | 5.30E-02 | 1.12E-01 |
| TGFB1    | -0.0740 | 1.55E-01 | 2.60E-01 |
| TGFBR1   | 0.0444  | 3.94E-01 | 5.27E-01 |
| TGFBR2   | -0.2862 | 2.00E-08 | 3.46E-07 |
| TGFBR3   | -0.1362 | 8.64E-03 | 2.59E-02 |
| TGFBRAP1 | -0.0295 | 5.72E-01 | 6.89E-01 |
| TGIF1    | 0.0679  | 1.92E-01 | 3.07E-01 |
| TGIF2LX  | 0.0362  | 4.87E-01 | 6.14E-01 |
| TGIF2LY  | 0.0459  | 3.78E-01 | 5.11E-01 |
| TGIF2    | 0.1081  | 3.73E-02 | 8.54E-02 |
| TGM1     | 0.2059  | 6.45E-05 | 4.20E-04 |
| TGM2     | -0.1592 | 2.11E-03 | 8.05E-03 |
| TGM3     | 0.0282  | 5.88E-01 | 7.03E-01 |
| TGM4     | 0.0395  | 4.48E-01 | 5.79E-01 |
| TGM5     | -0.0739 | 1.55E-01 | 2.60E-01 |
| TGM6     | -0.0322 | 5.36E-01 | 6.58E-01 |
| TGM7     | 0.0453  | 3.84E-01 | 5.17E-01 |
| TGOLN2   | -0.1393 | 7.20E-03 | 2.23E-02 |
| TGS1     | 0.1345  | 9.48E-03 | 2.80E-02 |
| TG       | -0.0436 | 4.02E-01 | 5.35E-01 |
| TH1L     | 0.1422  | 6.08E-03 | 1.94E-02 |
| THADA    | 0.0403  | 4.39E-01 | 5.71E-01 |
| THAP10   | 0.0782  | 1.33E-01 | 2.31E-01 |

|         |         |          |          |
|---------|---------|----------|----------|
| THAP11  | 0.0315  | 5.46E-01 | 6.66E-01 |
| THAP1   | 0.0890  | 8.69E-02 | 1.66E-01 |
| THAP2   | 0.0853  | 1.01E-01 | 1.87E-01 |
| THAP3   | 0.0293  | 5.74E-01 | 6.91E-01 |
| THAP4   | -0.0060 | 9.08E-01 | 9.43E-01 |
| THAP5   | -0.1132 | 2.93E-02 | 7.01E-02 |
| THAP6   | -0.0162 | 7.56E-01 | 8.36E-01 |
| THAP7   | 0.0665  | 2.01E-01 | 3.17E-01 |
| THAP8   | 0.1810  | 4.59E-04 | 2.21E-03 |
| THAP9   | 0.0195  | 7.09E-01 | 8.01E-01 |
| THBD    | -0.2201 | 1.88E-05 | 1.46E-04 |
| THBS1   | -0.1210 | 1.97E-02 | 5.07E-02 |
| THBS2   | -0.1028 | 4.80E-02 | 1.04E-01 |
| THBS3   | 0.1243  | 1.66E-02 | 4.42E-02 |
| THBS4   | -0.0589 | 2.58E-01 | 3.84E-01 |
| THEG    | 0.0343  | 5.10E-01 | 6.35E-01 |
| THEM4   | 0.4592  | 9.53E-21 | 2.67E-18 |
| THEM5   | 0.1820  | 4.26E-04 | 2.08E-03 |
| THEMIS  | -0.1057 | 4.19E-02 | 9.35E-02 |
| THG1L   | -0.1075 | 3.85E-02 | 8.74E-02 |
| THNSL1  | -0.2424 | 2.31E-06 | 2.37E-05 |
| THNSL2  | -0.0781 | 1.33E-01 | 2.32E-01 |
| THOC1   | 0.3463  | 6.86E-12 | 2.56E-10 |
| THOC2   | 0.2888  | 1.47E-08 | 2.64E-07 |
| THOC3   | 0.1826  | 4.06E-04 | 2.01E-03 |
| THOC4   | 0.3742  | 8.87E-14 | 4.74E-12 |
| THOC5   | 0.2520  | 8.78E-07 | 1.01E-05 |
| THOC6   | 0.1679  | 1.17E-03 | 4.91E-03 |
| THOC7   | 0.2300  | 7.59E-06 | 6.60E-05 |
| THOP1   | -0.0412 | 4.29E-01 | 5.61E-01 |
| THPO    | -0.0501 | 3.36E-01 | 4.67E-01 |
| THRAP3  | 0.1107  | 3.31E-02 | 7.74E-02 |
| THRA    | -0.0621 | 2.33E-01 | 3.56E-01 |
| THRB    | -0.1076 | 3.84E-02 | 8.73E-02 |
| THRSP   | -0.2742 | 8.01E-08 | 1.19E-06 |
| THSD1P1 | 0.0031  | 9.53E-01 | 9.71E-01 |
| THSD1   | -0.2153 | 2.89E-05 | 2.12E-04 |
| THSD4   | -0.0433 | 4.06E-01 | 5.39E-01 |
| THSD7A  | -0.1091 | 3.56E-02 | 8.21E-02 |
| THSD7B  | -0.0562 | 2.81E-01 | 4.09E-01 |
| THTPA   | -0.0964 | 6.37E-02 | 1.30E-01 |
| THUMPD1 | 0.0428  | 4.11E-01 | 5.44E-01 |
| THUMPD2 | 0.3045  | 2.13E-09 | 4.67E-08 |
| THUMPD3 | 0.0167  | 7.49E-01 | 8.31E-01 |

|          |         |          |          |
|----------|---------|----------|----------|
| THY1     | -0.0267 | 6.08E-01 | 7.20E-01 |
| THYN1    | -0.0084 | 8.72E-01 | 9.18E-01 |
| TH       | 0.0296  | 5.70E-01 | 6.88E-01 |
| TIA1     | 0.2432  | 2.13E-06 | 2.21E-05 |
| TIAF1    | -0.0231 | 6.57E-01 | 7.59E-01 |
| TIAL1    | 0.0908  | 8.07E-02 | 1.57E-01 |
| TIAM1    | -0.0760 | 1.44E-01 | 2.46E-01 |
| TIAM2    | 0.1912  | 2.12E-04 | 1.16E-03 |
| TICAM1   | 0.0603  | 2.47E-01 | 3.71E-01 |
| TICAM2   | 0.0889  | 8.74E-02 | 1.67E-01 |
| TIE1     | -0.2197 | 1.96E-05 | 1.52E-04 |
| TIFAB    | 0.0551  | 2.90E-01 | 4.19E-01 |
| TIFA     | -0.0021 | 9.68E-01 | 9.80E-01 |
| TIGD1    | 0.5110  | 4.61E-26 | 2.87E-23 |
| TIGD2    | -0.2036 | 7.83E-05 | 4.96E-04 |
| TIGD3    | 0.1771  | 6.10E-04 | 2.81E-03 |
| TIGD4    | 0.0912  | 7.94E-02 | 1.55E-01 |
| TIGD5    | 0.1727  | 8.35E-04 | 3.68E-03 |
| TIGD6    | 0.0394  | 4.50E-01 | 5.81E-01 |
| TIGD7    | 0.3423  | 1.24E-11 | 4.31E-10 |
| TIGIT    | 0.0052  | 9.20E-01 | 9.49E-01 |
| TIMD4    | -0.0794 | 1.27E-01 | 2.23E-01 |
| TIMELESS | 0.3368  | 2.71E-11 | 8.99E-10 |
| TIMM10   | -0.0194 | 7.10E-01 | 8.02E-01 |
| TIMM13   | -0.0857 | 9.92E-02 | 1.85E-01 |
| TIMM16   | 0.0710  | 1.72E-01 | 2.82E-01 |
| TIMM17A  | 0.0243  | 6.41E-01 | 7.46E-01 |
| TIMM17B  | 0.1693  | 1.06E-03 | 4.51E-03 |
| TIMM22   | -0.0211 | 6.85E-01 | 7.82E-01 |
| TIMM44   | -0.0797 | 1.25E-01 | 2.21E-01 |
| TIMM50   | 0.1146  | 2.73E-02 | 6.61E-02 |
| TIMM8A   | -0.0352 | 4.99E-01 | 6.25E-01 |
| TIMM8B   | -0.0144 | 7.82E-01 | 8.55E-01 |
| TIMM9    | 0.1699  | 1.02E-03 | 4.37E-03 |
| TIMP1    | -0.0408 | 4.34E-01 | 5.65E-01 |
| TIMP2    | 0.0022  | 9.66E-01 | 9.79E-01 |
| TIMP3    | -0.3041 | 2.25E-09 | 4.88E-08 |
| TIMP4    | -0.0728 | 1.62E-01 | 2.69E-01 |
| TINAGL1  | -0.1452 | 5.06E-03 | 1.67E-02 |
| TINAG    | 0.0698  | 1.80E-01 | 2.92E-01 |
| TINF2    | -0.0231 | 6.58E-01 | 7.59E-01 |
| TIPARP   | -0.1044 | 4.44E-02 | 9.79E-02 |
| TIPIN    | 0.3717  | 1.34E-13 | 7.05E-12 |
| TIPRL    | 0.4544  | 2.68E-20 | 7.02E-18 |

|         |         |          |          |
|---------|---------|----------|----------|
| TIRAP   | 0.0831  | 1.10E-01 | 2.00E-01 |
| TJAP1   | 0.4010  | 9.12E-16 | 7.51E-14 |
| TJP1    | -0.0189 | 7.16E-01 | 8.07E-01 |
| TJP2    | 0.1277  | 1.38E-02 | 3.82E-02 |
| TJP3    | 0.0185  | 7.23E-01 | 8.12E-01 |
| TK1     | 0.2945  | 7.41E-09 | 1.42E-07 |
| TK2     | -0.4722 | 5.28E-22 | 1.78E-19 |
| TKTL1   | 0.1510  | 3.55E-03 | 1.25E-02 |
| TKTL2   | 0.1684  | 1.13E-03 | 4.78E-03 |
| TKT     | 0.0783  | 1.32E-01 | 2.30E-01 |
| TLCD1   | 0.1952  | 1.54E-04 | 8.84E-04 |
| TLE1    | 0.1748  | 7.21E-04 | 3.25E-03 |
| TLE2    | -0.2180 | 2.27E-05 | 1.72E-04 |
| TLE3    | 0.0751  | 1.49E-01 | 2.52E-01 |
| TLE4    | -0.0873 | 9.31E-02 | 1.76E-01 |
| TLE6    | -0.0245 | 6.38E-01 | 7.44E-01 |
| TLK1    | 0.0774  | 1.37E-01 | 2.36E-01 |
| TLK2    | 0.3629  | 5.42E-13 | 2.54E-11 |
| TLL1    | -0.1525 | 3.23E-03 | 1.15E-02 |
| TLL2    | 0.1291  | 1.28E-02 | 3.58E-02 |
| TLN1    | 0.0555  | 2.87E-01 | 4.15E-01 |
| TLN2    | -0.1043 | 4.48E-02 | 9.86E-02 |
| TLR10   | 0.1641  | 1.52E-03 | 6.10E-03 |
| TLR1    | 0.0352  | 4.99E-01 | 6.25E-01 |
| TLR2    | -0.0235 | 6.51E-01 | 7.55E-01 |
| TLR3    | -0.2023 | 8.68E-05 | 5.41E-04 |
| TLR4    | -0.1740 | 7.61E-04 | 3.41E-03 |
| TLR5    | 0.2562  | 5.67E-07 | 6.81E-06 |
| TLR6    | 0.0091  | 8.61E-01 | 9.10E-01 |
| TLR7    | -0.0284 | 5.85E-01 | 7.01E-01 |
| TLR8    | -0.0806 | 1.21E-01 | 2.16E-01 |
| TLR9    | 0.1364  | 8.54E-03 | 2.57E-02 |
| TLX1NB  | 0.0671  | 1.97E-01 | 3.13E-01 |
| TLX1    | 0.0003  | 9.95E-01 | 9.97E-01 |
| TLX2    | 0.1547  | 2.81E-03 | 1.03E-02 |
| TLX3    | -0.0053 | 9.18E-01 | 9.48E-01 |
| TM2D1   | 0.0747  | 1.51E-01 | 2.55E-01 |
| TM2D2   | -0.0014 | 9.79E-01 | 9.87E-01 |
| TM2D3   | -0.1837 | 3.76E-04 | 1.88E-03 |
| TM4SF18 | -0.1290 | 1.29E-02 | 3.60E-02 |
| TM4SF19 | 0.0630  | 2.26E-01 | 3.48E-01 |
| TM4SF1  | 0.0912  | 7.93E-02 | 1.55E-01 |
| TM4SF20 | 0.1003  | 5.37E-02 | 1.14E-01 |
| TM4SF4  | -0.0941 | 7.03E-02 | 1.41E-01 |

|              |         |          |          |
|--------------|---------|----------|----------|
| TM4SF5       | -0.0264 | 6.12E-01 | 7.23E-01 |
| TM6SF1       | -0.0723 | 1.65E-01 | 2.73E-01 |
| TM6SF2       | -0.2577 | 4.87E-07 | 5.98E-06 |
| TM7SF2       | -0.1722 | 8.66E-04 | 3.80E-03 |
| TM7SF3       | -0.0129 | 8.04E-01 | 8.71E-01 |
| TM7SF4       | -0.1486 | 4.13E-03 | 1.41E-02 |
| TM9SF1       | -0.1102 | 3.39E-02 | 7.90E-02 |
| TM9SF2       | -0.0510 | 3.28E-01 | 4.58E-01 |
| TM9SF3       | -0.1483 | 4.20E-03 | 1.43E-02 |
| TM9SF4       | -0.0270 | 6.04E-01 | 7.17E-01 |
| TMBIM1       | -0.0098 | 8.51E-01 | 9.03E-01 |
| TMBIM4       | -0.0608 | 2.43E-01 | 3.67E-01 |
| TMBIM6       | -0.3742 | 8.91E-14 | 4.74E-12 |
| TMC1         | 0.0200  | 7.01E-01 | 7.94E-01 |
| TMC2         | 0.1991  | 1.13E-04 | 6.74E-04 |
| TMC3         | 0.1207  | 2.00E-02 | 5.14E-02 |
| TMC4         | 0.0683  | 1.90E-01 | 3.03E-01 |
| TMC5         | 0.0732  | 1.59E-01 | 2.65E-01 |
| TMC6         | 0.0944  | 6.95E-02 | 1.40E-01 |
| TMC7         | 0.1066  | 4.02E-02 | 9.05E-02 |
| TMC8         | -0.0540 | 2.99E-01 | 4.29E-01 |
| TMCC1        | -0.0820 | 1.15E-01 | 2.07E-01 |
| TMCC2        | -0.0326 | 5.31E-01 | 6.53E-01 |
| TMCC3        | 0.0180  | 7.30E-01 | 8.17E-01 |
| TMCO1        | 0.3072  | 1.50E-09 | 3.43E-08 |
| TMCO2        | 0.1520  | 3.34E-03 | 1.18E-02 |
| TMCO3        | 0.1797  | 5.04E-04 | 2.39E-03 |
| TMCO4        | -0.0318 | 5.41E-01 | 6.62E-01 |
| TMCO5A       | 0.0597  | 2.51E-01 | 3.76E-01 |
| TMCO6        | 0.0472  | 3.64E-01 | 4.97E-01 |
| TMCO7        | -0.2129 | 3.56E-05 | 2.53E-04 |
| TMED10P1     | -0.0015 | 9.77E-01 | 9.86E-01 |
| TMED10       | -0.2094 | 4.80E-05 | 3.27E-04 |
| TMED1        | -0.2128 | 3.58E-05 | 2.55E-04 |
| TMED2        | 0.0000  | 1.00E+00 | 1.00E+00 |
| TMED3        | 0.1609  | 1.88E-03 | 7.31E-03 |
| TMED4        | -0.1257 | 1.54E-02 | 4.15E-02 |
| TMED5        | -0.0530 | 3.09E-01 | 4.38E-01 |
| TMED6        | -0.0510 | 3.27E-01 | 4.57E-01 |
| TMED7-TICAM2 | -0.1122 | 3.07E-02 | 7.28E-02 |
| TMED7        | -0.1316 | 1.12E-02 | 3.20E-02 |
| TMED8        | 0.1576  | 2.33E-03 | 8.75E-03 |
| TMED9        | 0.0356  | 4.94E-01 | 6.21E-01 |
| TMEFF1       | 0.1387  | 7.48E-03 | 2.30E-02 |

|          |         |          |          |
|----------|---------|----------|----------|
| TMEFF2   | -0.0168 | 7.47E-01 | 8.29E-01 |
| TMEM100  | -0.2482 | 1.29E-06 | 1.42E-05 |
| TMEM101  | 0.1827  | 4.03E-04 | 1.99E-03 |
| TMEM102  | -0.0517 | 3.21E-01 | 4.51E-01 |
| TMEM104  | 0.1174  | 2.37E-02 | 5.90E-02 |
| TMEM105  | 0.0815  | 1.17E-01 | 2.10E-01 |
| TMEM106A | -0.0101 | 8.46E-01 | 8.99E-01 |
| TMEM106B | -0.0496 | 3.40E-01 | 4.72E-01 |
| TMEM106C | 0.3360  | 3.04E-11 | 9.99E-10 |
| TMEM107  | 0.1650  | 1.43E-03 | 5.79E-03 |
| TMEM108  | -0.0083 | 8.73E-01 | 9.18E-01 |
| TMEM109  | 0.0201  | 7.00E-01 | 7.93E-01 |
| TMEM110  | -0.2754 | 6.98E-08 | 1.05E-06 |
| TMEM111  | -0.1587 | 2.16E-03 | 8.22E-03 |
| TMEM114  | -0.0435 | 4.03E-01 | 5.36E-01 |
| TMEM115  | 0.1175  | 2.36E-02 | 5.88E-02 |
| TMEM116  | 0.1459  | 4.85E-03 | 1.61E-02 |
| TMEM117  | -0.0752 | 1.48E-01 | 2.52E-01 |
| TMEM119  | -0.0472 | 3.65E-01 | 4.97E-01 |
| TMEM11   | 0.0775  | 1.36E-01 | 2.36E-01 |
| TMEM120A | -0.2139 | 3.28E-05 | 2.35E-04 |
| TMEM120B | 0.2749  | 7.39E-08 | 1.11E-06 |
| TMEM121  | -0.0909 | 8.05E-02 | 1.57E-01 |
| TMEM123  | -0.0011 | 9.84E-01 | 9.90E-01 |
| TMEM125  | 0.0892  | 8.62E-02 | 1.65E-01 |
| TMEM126A | 0.0489  | 3.48E-01 | 4.80E-01 |
| TMEM126B | 0.1002  | 5.39E-02 | 1.14E-01 |
| TMEM127  | -0.2281 | 9.12E-06 | 7.76E-05 |
| TMEM128  | 0.0525  | 3.13E-01 | 4.42E-01 |
| TMEM129  | -0.2760 | 6.56E-08 | 9.96E-07 |
| TMEM130  | 0.1792  | 5.24E-04 | 2.47E-03 |
| TMEM131  | 0.1091  | 3.57E-02 | 8.23E-02 |
| TMEM132A | 0.0930  | 7.34E-02 | 1.46E-01 |
| TMEM132B | -0.0571 | 2.73E-01 | 4.01E-01 |
| TMEM132C | -0.1583 | 2.22E-03 | 8.40E-03 |
| TMEM132D | -0.0244 | 6.40E-01 | 7.46E-01 |
| TMEM132E | -0.1064 | 4.05E-02 | 9.11E-02 |
| TMEM133  | -0.0922 | 7.60E-02 | 1.50E-01 |
| TMEM134  | -0.2988 | 4.34E-09 | 8.83E-08 |
| TMEM135  | -0.1434 | 5.66E-03 | 1.83E-02 |
| TMEM136  | 0.2248  | 1.24E-05 | 1.01E-04 |
| TMEM138  | 0.0061  | 9.06E-01 | 9.41E-01 |
| TMEM139  | 0.1041  | 4.50E-02 | 9.91E-02 |
| TMEM140  | -0.3121 | 8.01E-10 | 1.94E-08 |



|          |         |          |          |
|----------|---------|----------|----------|
| TMEM141  | -0.0223 | 6.69E-01 | 7.69E-01 |
| TMEM143  | -0.2008 | 9.86E-05 | 6.02E-04 |
| TMEM144  | -0.0188 | 7.17E-01 | 8.08E-01 |
| TMEM145  | 0.0786  | 1.31E-01 | 2.28E-01 |
| TMEM146  | 0.0266  | 6.10E-01 | 7.21E-01 |
| TMEM147  | 0.1413  | 6.42E-03 | 2.03E-02 |
| TMEM149  | -0.0336 | 5.19E-01 | 6.43E-01 |
| TMEM14A  | 0.1307  | 1.17E-02 | 3.33E-02 |
| TMEM14B  | 0.2439  | 1.99E-06 | 2.09E-05 |
| TMEM14C  | 0.1053  | 4.26E-02 | 9.47E-02 |
| TMEM14E  | 0.0225  | 6.66E-01 | 7.66E-01 |
| TMEM150A | -0.2490 | 1.19E-06 | 1.32E-05 |
| TMEM150B | -0.0001 | 9.98E-01 | 9.99E-01 |
| TMEM150C | -0.1650 | 1.43E-03 | 5.79E-03 |
| TMEM151A | 0.0335  | 5.20E-01 | 6.44E-01 |
| TMEM151B | 0.2315  | 6.63E-06 | 5.91E-05 |
| TMEM154  | -0.1435 | 5.61E-03 | 1.81E-02 |
| TMEM155  | 0.1197  | 2.11E-02 | 5.35E-02 |
| TMEM156  | -0.0134 | 7.97E-01 | 8.65E-01 |
| TMEM158  | -0.0454 | 3.84E-01 | 5.17E-01 |
| TMEM159  | 0.0669  | 1.98E-01 | 3.15E-01 |
| TMEM160  | 0.0044  | 9.32E-01 | 9.58E-01 |
| TMEM161A | -0.0874 | 9.29E-02 | 1.75E-01 |
| TMEM161B | -0.0334 | 5.21E-01 | 6.45E-01 |
| TMEM163  | -0.0136 | 7.94E-01 | 8.64E-01 |
| TMEM164  | 0.1714  | 9.17E-04 | 3.99E-03 |
| TMEM165  | 0.1332  | 1.02E-02 | 2.97E-02 |
| TMEM167A | -0.0453 | 3.84E-01 | 5.17E-01 |
| TMEM167B | -0.0942 | 7.00E-02 | 1.40E-01 |
| TMEM168  | 0.1381  | 7.72E-03 | 2.36E-02 |
| TMEM169  | 0.0512  | 3.26E-01 | 4.56E-01 |
| TMEM170A | -0.1778 | 5.79E-04 | 2.69E-03 |
| TMEM170B | 0.0254  | 6.26E-01 | 7.34E-01 |
| TMEM171  | 0.1601  | 1.98E-03 | 7.63E-03 |
| TMEM173  | -0.1298 | 1.23E-02 | 3.46E-02 |
| TMEM174  | -0.0370 | 4.77E-01 | 6.06E-01 |
| TMEM175  | -0.1526 | 3.22E-03 | 1.15E-02 |
| TMEM176A | -0.1757 | 6.77E-04 | 3.08E-03 |
| TMEM176B | -0.2139 | 3.27E-05 | 2.35E-04 |
| TMEM177  | -0.0445 | 3.93E-01 | 5.26E-01 |
| TMEM178  | -0.0457 | 3.80E-01 | 5.14E-01 |
| TMEM179B | -0.1468 | 4.61E-03 | 1.54E-02 |
| TMEM179  | 0.1179  | 2.31E-02 | 5.78E-02 |
| TMEM17   | -0.0046 | 9.29E-01 | 9.56E-01 |

|              |         |          |          |
|--------------|---------|----------|----------|
| TMEM180      | 0.1122  | 3.07E-02 | 7.28E-02 |
| TMEM181      | 0.1832  | 3.91E-04 | 1.95E-03 |
| TMEM182      | 0.0479  | 3.57E-01 | 4.89E-01 |
| TMEM183A     | 0.2611  | 3.39E-07 | 4.36E-06 |
| TMEM184A     | -0.0191 | 7.13E-01 | 8.04E-01 |
| TMEM184B     | 0.1269  | 1.45E-02 | 3.96E-02 |
| TMEM184C     | -0.1764 | 6.41E-04 | 2.94E-03 |
| TMEM185A     | 0.1839  | 3.70E-04 | 1.86E-03 |
| TMEM185B     | 0.0923  | 7.58E-02 | 1.49E-01 |
| TMEM186      | 0.0758  | 1.45E-01 | 2.47E-01 |
| TMEM187      | -0.0359 | 4.91E-01 | 6.18E-01 |
| TMEM188      | -0.1348 | 9.34E-03 | 2.77E-02 |
| TMEM189-UBE2 | -0.0276 | 5.96E-01 | 7.10E-01 |
| TMEM189      | 0.1459  | 4.88E-03 | 1.62E-02 |
| TMEM18       | 0.0903  | 8.24E-02 | 1.60E-01 |
| TMEM190      | 0.1535  | 3.04E-03 | 1.09E-02 |
| TMEM191A     | 0.0525  | 3.13E-01 | 4.43E-01 |
| TMEM192      | -0.3628 | 5.49E-13 | 2.56E-11 |
| TMEM194A     | 0.2945  | 7.37E-09 | 1.41E-07 |
| TMEM194B     | 0.1993  | 1.11E-04 | 6.66E-04 |
| TMEM195      | -0.1453 | 5.04E-03 | 1.66E-02 |
| TMEM196      | -0.0220 | 6.72E-01 | 7.72E-01 |
| TMEM198      | 0.0095  | 8.55E-01 | 9.06E-01 |
| TMEM199      | 0.1263  | 1.50E-02 | 4.06E-02 |
| TMEM19       | -0.1515 | 3.45E-03 | 1.22E-02 |
| TMEM200A     | -0.0344 | 5.09E-01 | 6.33E-01 |
| TMEM200B     | 0.0369  | 4.78E-01 | 6.07E-01 |
| TMEM200C     | 0.1029  | 4.75E-02 | 1.03E-01 |
| TMEM201      | 0.3577  | 1.22E-12 | 5.33E-11 |
| TMEM202      | -0.0374 | 4.73E-01 | 6.02E-01 |
| TMEM203      | 0.0712  | 1.71E-01 | 2.80E-01 |
| TMEM204      | -0.2026 | 8.46E-05 | 5.30E-04 |
| TMEM205      | -0.2339 | 5.26E-06 | 4.84E-05 |
| TMEM206      | 0.2231  | 1.44E-05 | 1.16E-04 |
| TMEM207      | 0.1484  | 4.17E-03 | 1.42E-02 |
| TMEM208      | -0.2211 | 1.73E-05 | 1.36E-04 |
| TMEM209      | 0.0583  | 2.63E-01 | 3.89E-01 |
| TMEM20       | -0.0601 | 2.48E-01 | 3.73E-01 |
| TMEM211      | 0.0299  | 5.66E-01 | 6.83E-01 |
| TMEM212      | 0.1390  | 7.33E-03 | 2.26E-02 |
| TMEM213      | 0.1092  | 3.55E-02 | 8.19E-02 |
| TMEM214      | 0.0186  | 7.21E-01 | 8.10E-01 |
| TMEM215      | -0.0293 | 5.73E-01 | 6.91E-01 |
| TMEM216      | 0.2256  | 1.14E-05 | 9.45E-05 |

|          |         |          |          |
|----------|---------|----------|----------|
| TMEM217  | -0.1118 | 3.13E-02 | 7.40E-02 |
| TMEM218  | 0.2436  | 2.05E-06 | 2.14E-05 |
| TMEM219  | -0.1541 | 2.92E-03 | 1.06E-02 |
| TMEM220  | -0.2163 | 2.64E-05 | 1.97E-04 |
| TMEM222  | -0.1140 | 2.82E-02 | 6.80E-02 |
| TMEM223  | 0.0005  | 9.93E-01 | 9.96E-01 |
| TMEM229A | -0.0267 | 6.08E-01 | 7.20E-01 |
| TMEM229B | -0.0035 | 9.47E-01 | 9.67E-01 |
| TMEM22   | 0.0928  | 7.41E-02 | 1.47E-01 |
| TMEM231  | -0.0719 | 1.67E-01 | 2.75E-01 |
| TMEM232  | -0.1506 | 3.64E-03 | 1.27E-02 |
| TMEM233  | -0.2214 | 1.68E-05 | 1.33E-04 |
| TMEM25   | -0.1528 | 3.18E-03 | 1.13E-02 |
| TMEM26   | -0.1145 | 2.74E-02 | 6.64E-02 |
| TMEM27   | -0.1243 | 1.66E-02 | 4.42E-02 |
| TMEM2    | -0.0632 | 2.25E-01 | 3.46E-01 |
| TMEM30A  | -0.0411 | 4.30E-01 | 5.62E-01 |
| TMEM30B  | -0.1779 | 5.78E-04 | 2.68E-03 |
| TMEM30C  | 0.0795  | 1.26E-01 | 2.22E-01 |
| TMEM31   | 0.0199  | 7.02E-01 | 7.95E-01 |
| TMEM33   | -0.1337 | 9.92E-03 | 2.90E-02 |
| TMEM35   | 0.0468  | 3.69E-01 | 5.02E-01 |
| TMEM37   | -0.1428 | 5.88E-03 | 1.88E-02 |
| TMEM38A  | -0.0922 | 7.60E-02 | 1.50E-01 |
| TMEM38B  | 0.0248  | 6.35E-01 | 7.42E-01 |
| TMEM39A  | 0.2504  | 1.03E-06 | 1.16E-05 |
| TMEM39B  | 0.1023  | 4.90E-02 | 1.06E-01 |
| TMEM40   | 0.0847  | 1.03E-01 | 1.90E-01 |
| TMEM41A  | 0.0120  | 8.18E-01 | 8.81E-01 |
| TMEM41B  | 0.1139  | 2.82E-02 | 6.80E-02 |
| TMEM42   | 0.0055  | 9.17E-01 | 9.47E-01 |
| TMEM43   | 0.0301  | 5.63E-01 | 6.81E-01 |
| TMEM44   | 0.1476  | 4.40E-03 | 1.49E-02 |
| TMEM45A  | -0.0220 | 6.73E-01 | 7.72E-01 |
| TMEM45B  | 0.0599  | 2.50E-01 | 3.75E-01 |
| TMEM47   | -0.2051 | 6.89E-05 | 4.45E-04 |
| TMEM48   | 0.1174  | 2.37E-02 | 5.89E-02 |
| TMEM49   | 0.2153  | 2.88E-05 | 2.12E-04 |
| TMEM50A  | -0.0143 | 7.84E-01 | 8.56E-01 |
| TMEM50B  | 0.0232  | 6.57E-01 | 7.58E-01 |
| TMEM51   | 0.1336  | 1.00E-02 | 2.92E-02 |
| TMEM52   | 0.0479  | 3.58E-01 | 4.90E-01 |
| TMEM53   | -0.3149 | 5.51E-10 | 1.38E-08 |
| TMEM54   | -0.0022 | 9.66E-01 | 9.79E-01 |

|         |         |          |          |
|---------|---------|----------|----------|
| TMEM55A | 0.1115  | 3.18E-02 | 7.49E-02 |
| TMEM55B | 0.0193  | 7.12E-01 | 8.03E-01 |
| TMEM56  | -0.1954 | 1.52E-04 | 8.70E-04 |
| TMEM57  | -0.1576 | 2.33E-03 | 8.75E-03 |
| TMEM59L | -0.0251 | 6.30E-01 | 7.38E-01 |
| TMEM59  | -0.1667 | 1.27E-03 | 5.27E-03 |
| TMEM5   | 0.0820  | 1.15E-01 | 2.07E-01 |
| TMEM60  | 0.0851  | 1.02E-01 | 1.88E-01 |
| TMEM61  | 0.2580  | 4.72E-07 | 5.82E-06 |
| TMEM62  | 0.1125  | 3.02E-02 | 7.19E-02 |
| TMEM63A | -0.1334 | 1.01E-02 | 2.95E-02 |
| TMEM63B | -0.0613 | 2.39E-01 | 3.63E-01 |
| TMEM63C | 0.0046  | 9.29E-01 | 9.56E-01 |
| TMEM64  | -0.1170 | 2.42E-02 | 6.00E-02 |
| TMEM65  | 0.2021  | 8.88E-05 | 5.51E-04 |
| TMEM66  | -0.2384 | 3.42E-06 | 3.34E-05 |
| TMEM67  | 0.1859  | 3.19E-04 | 1.64E-03 |
| TMEM68  | 0.0611  | 2.41E-01 | 3.65E-01 |
| TMEM69  | 0.1369  | 8.30E-03 | 2.51E-02 |
| TMEM70  | -0.1433 | 5.69E-03 | 1.83E-02 |
| TMEM71  | -0.1122 | 3.08E-02 | 7.29E-02 |
| TMEM72  | 0.1822  | 4.19E-04 | 2.06E-03 |
| TMEM74  | 0.0163  | 7.54E-01 | 8.34E-01 |
| TMEM79  | 0.4314  | 3.02E-18 | 4.59E-16 |
| TMEM80  | 0.1026  | 4.84E-02 | 1.05E-01 |
| TMEM81  | 0.2557  | 5.97E-07 | 7.13E-06 |
| TMEM82  | -0.2180 | 2.28E-05 | 1.73E-04 |
| TMEM84  | 0.0930  | 7.36E-02 | 1.46E-01 |
| TMEM85  | -0.0679 | 1.92E-01 | 3.07E-01 |
| TMEM86A | -0.1166 | 2.47E-02 | 6.09E-02 |
| TMEM86B | -0.0108 | 8.35E-01 | 8.92E-01 |
| TMEM87A | 0.1025  | 4.85E-02 | 1.05E-01 |
| TMEM87B | 0.1237  | 1.71E-02 | 4.53E-02 |
| TMEM88B | 0.0612  | 2.40E-01 | 3.64E-01 |
| TMEM88  | -0.2348 | 4.86E-06 | 4.53E-05 |
| TMEM89  | 0.0353  | 4.98E-01 | 6.25E-01 |
| TMEM8A  | -0.1425 | 5.97E-03 | 1.91E-02 |
| TMEM8B  | 0.1187  | 2.22E-02 | 5.59E-02 |
| TMEM8C  | 0.0862  | 9.73E-02 | 1.82E-01 |
| TMEM90A | -0.0293 | 5.74E-01 | 6.91E-01 |
| TMEM90B | -0.0638 | 2.21E-01 | 3.41E-01 |
| TMEM91  | 0.2016  | 9.23E-05 | 5.69E-04 |
| TMEM92  | -0.0169 | 7.45E-01 | 8.28E-01 |
| TMEM93  | -0.0698 | 1.79E-01 | 2.91E-01 |

|             |         |          |          |
|-------------|---------|----------|----------|
| TMEM95      | 0.0183  | 7.25E-01 | 8.13E-01 |
| TMEM97      | 0.1524  | 3.25E-03 | 1.15E-02 |
| TMEM98      | 0.2343  | 5.08E-06 | 4.70E-05 |
| TMEM99      | 0.1028  | 4.79E-02 | 1.04E-01 |
| TMEM9B      | -0.1591 | 2.12E-03 | 8.08E-03 |
| TMEM9       | 0.2805  | 3.91E-08 | 6.28E-07 |
| TMF1        | 0.0227  | 6.63E-01 | 7.64E-01 |
| TMIE        | 0.2608  | 3.48E-07 | 4.44E-06 |
| TMIGD1      | 0.1274  | 1.41E-02 | 3.87E-02 |
| TMIGD2      | -0.0927 | 7.44E-02 | 1.47E-01 |
| TMLHE       | -0.0891 | 8.66E-02 | 1.66E-01 |
| TMOD1       | -0.1312 | 1.14E-02 | 3.26E-02 |
| TMOD2       | -0.1173 | 2.38E-02 | 5.92E-02 |
| TMOD3       | -0.0349 | 5.02E-01 | 6.28E-01 |
| TMOD4       | 0.1944  | 1.65E-04 | 9.33E-04 |
| TMPO        | 0.3007  | 3.41E-09 | 7.11E-08 |
| TMPPE       | 0.0575  | 2.69E-01 | 3.97E-01 |
| TMPRSS11A   | -0.0558 | 2.83E-01 | 4.12E-01 |
| TMPRSS11BNL | -0.0300 | 5.65E-01 | 6.83E-01 |
| TMPRSS11B   | -0.0304 | 5.60E-01 | 6.78E-01 |
| TMPRSS11D   | -0.0325 | 5.33E-01 | 6.55E-01 |
| TMPRSS11F   | -0.0607 | 2.44E-01 | 3.68E-01 |
| TMPRSS12    | 0.1623  | 1.71E-03 | 6.77E-03 |
| TMPRSS13    | 0.0898  | 8.42E-02 | 1.62E-01 |
| TMPRSS15    | 0.1229  | 1.79E-02 | 4.70E-02 |
| TMPRSS2     | -0.0820 | 1.15E-01 | 2.07E-01 |
| TMPRSS3     | 0.2564  | 5.59E-07 | 6.72E-06 |
| TMPRSS4     | 0.0779  | 1.34E-01 | 2.33E-01 |
| TMPRSS5     | 0.0169  | 7.46E-01 | 8.28E-01 |
| TMPRSS6     | -0.1085 | 3.67E-02 | 8.42E-02 |
| TMPRSS7     | 0.1825  | 4.11E-04 | 2.02E-03 |
| TMPRSS9     | -0.0088 | 8.67E-01 | 9.14E-01 |
| TMSB10      | 0.1032  | 4.70E-02 | 1.03E-01 |
| TMSB15A     | 0.1916  | 2.05E-04 | 1.12E-03 |
| TMSB15B     | 0.0861  | 9.79E-02 | 1.83E-01 |
| TMSB4Y      | -0.0381 | 4.65E-01 | 5.95E-01 |
| TMSL3       | 0.0133  | 7.98E-01 | 8.67E-01 |
| TMTC1       | -0.0890 | 8.71E-02 | 1.66E-01 |
| TMTC2       | 0.0604  | 2.45E-01 | 3.70E-01 |
| TMTC3       | 0.0920  | 7.67E-02 | 1.51E-01 |
| TMTC4       | 0.1290  | 1.29E-02 | 3.60E-02 |
| TMUB1       | -0.0872 | 9.34E-02 | 1.76E-01 |
| TMUB2       | 0.2344  | 5.01E-06 | 4.65E-05 |
| TMX1        | -0.0512 | 3.25E-01 | 4.56E-01 |

|              |         |          |          |
|--------------|---------|----------|----------|
| TMX2         | 0.0147  | 7.78E-01 | 8.52E-01 |
| TMX3         | 0.1120  | 3.10E-02 | 7.33E-02 |
| TMX4         | 0.0514  | 3.24E-01 | 4.54E-01 |
| TNC          | -0.0661 | 2.04E-01 | 3.21E-01 |
| TNFAIP1      | -0.0520 | 3.18E-01 | 4.48E-01 |
| TNFAIP2      | 0.1141  | 2.80E-02 | 6.76E-02 |
| TNFAIP3      | 0.0748  | 1.51E-01 | 2.55E-01 |
| TNFAIP6      | 0.0750  | 1.49E-01 | 2.53E-01 |
| TNFAIP8L1    | -0.2069 | 5.95E-05 | 3.92E-04 |
| TNFAIP8L2    | -0.0041 | 9.37E-01 | 9.61E-01 |
| TNFAIP8L3    | 0.0337  | 5.18E-01 | 6.42E-01 |
| TNFAIP8      | 0.0429  | 4.10E-01 | 5.43E-01 |
| TNFRSF10A    | -0.0811 | 1.19E-01 | 2.13E-01 |
| TNFRSF10B    | -0.0630 | 2.26E-01 | 3.48E-01 |
| TNFRSF10C    | -0.0019 | 9.71E-01 | 9.81E-01 |
| TNFRSF10D    | -0.0844 | 1.05E-01 | 1.92E-01 |
| TNFRSF11A    | 0.1320  | 1.10E-02 | 3.14E-02 |
| TNFRSF11B    | 0.0921  | 7.63E-02 | 1.50E-01 |
| TNFRSF12A    | -0.0413 | 4.28E-01 | 5.60E-01 |
| TNFRSF13B    | 0.0596  | 2.52E-01 | 3.77E-01 |
| TNFRSF13C    | 0.1648  | 1.45E-03 | 5.86E-03 |
| TNFRSF14     | -0.0514 | 3.23E-01 | 4.54E-01 |
| TNFRSF17     | -0.0020 | 9.70E-01 | 9.81E-01 |
| TNFRSF18     | 0.1194  | 2.14E-02 | 5.43E-02 |
| TNFRSF19     | -0.0058 | 9.12E-01 | 9.45E-01 |
| TNFRSF1A     | -0.1299 | 1.23E-02 | 3.45E-02 |
| TNFRSF1B     | -0.1116 | 3.17E-02 | 7.47E-02 |
| TNFRSF21     | 0.0232  | 6.56E-01 | 7.58E-01 |
| TNFRSF25     | 0.1523  | 3.27E-03 | 1.16E-02 |
| TNFRSF4      | 0.1423  | 6.04E-03 | 1.93E-02 |
| TNFRSF6B     | 0.0813  | 1.18E-01 | 2.12E-01 |
| TNFRSF8      | -0.0138 | 7.91E-01 | 8.61E-01 |
| TNFRSF9      | 0.0140  | 7.88E-01 | 8.59E-01 |
| TNFSF10      | 0.0090  | 8.63E-01 | 9.11E-01 |
| TNFSF11      | -0.0542 | 2.98E-01 | 4.27E-01 |
| TNFSF12-TNFS | -0.0373 | 4.73E-01 | 6.02E-01 |
| TNFSF12      | 0.0085  | 8.70E-01 | 9.16E-01 |
| TNFSF13B     | -0.0603 | 2.46E-01 | 3.71E-01 |
| TNFSF13      | -0.0836 | 1.08E-01 | 1.97E-01 |
| TNFSF14      | 0.0962  | 6.42E-02 | 1.31E-01 |
| TNFSF15      | 0.0390  | 4.54E-01 | 5.84E-01 |
| TNFSF18      | -0.0419 | 4.21E-01 | 5.54E-01 |
| TNFSF4       | 0.2513  | 9.42E-07 | 1.08E-05 |
| TNFSF8       | -0.1471 | 4.51E-03 | 1.52E-02 |

|          |         |          |          |
|----------|---------|----------|----------|
| TNFSF9   | 0.1627  | 1.66E-03 | 6.61E-03 |
| TNF      | 0.0141  | 7.86E-01 | 8.58E-01 |
| TNIK     | 0.0822  | 1.14E-01 | 2.06E-01 |
| TNIP1    | -0.1200 | 2.08E-02 | 5.30E-02 |
| TNIP2    | -0.0255 | 6.25E-01 | 7.34E-01 |
| TNIP3    | -0.0320 | 5.39E-01 | 6.61E-01 |
| TNK1     | 0.1510  | 3.55E-03 | 1.24E-02 |
| TNK2     | 0.0320  | 5.39E-01 | 6.61E-01 |
| TNKS1BP1 | -0.1422 | 6.08E-03 | 1.94E-02 |
| TNKS2    | -0.0581 | 2.64E-01 | 3.91E-01 |
| TNKS     | 0.0906  | 8.13E-02 | 1.58E-01 |
| TNMD     | -0.1758 | 6.71E-04 | 3.05E-03 |
| TNNC1    | 0.1569  | 2.44E-03 | 9.08E-03 |
| TNNC2    | -0.0116 | 8.24E-01 | 8.85E-01 |
| TNNI1    | 0.0766  | 1.41E-01 | 2.41E-01 |
| TNNI2    | 0.0786  | 1.31E-01 | 2.28E-01 |
| TNNI3K   | 0.0291  | 5.76E-01 | 6.93E-01 |
| TNNI3    | 0.1948  | 1.59E-04 | 9.06E-04 |
| TNNT1    | 0.1937  | 1.75E-04 | 9.80E-04 |
| TNNT2    | 0.3170  | 4.21E-10 | 1.09E-08 |
| TNNT3    | -0.0239 | 6.46E-01 | 7.51E-01 |
| TNN      | -0.0351 | 5.01E-01 | 6.27E-01 |
| TNP1     | 0.0186  | 7.21E-01 | 8.11E-01 |
| TNPO1    | 0.0755  | 1.47E-01 | 2.50E-01 |
| TNPO2    | 0.0035  | 9.47E-01 | 9.67E-01 |
| TNPO3    | -0.0703 | 1.77E-01 | 2.88E-01 |
| TNRC18   | 0.2297  | 7.81E-06 | 6.75E-05 |
| TNRC6A   | -0.0363 | 4.86E-01 | 6.14E-01 |
| TNRC6B   | 0.0193  | 7.11E-01 | 8.03E-01 |
| TNRC6C   | -0.0090 | 8.63E-01 | 9.12E-01 |
| TNR      | 0.0303  | 5.60E-01 | 6.79E-01 |
| TNS1     | -0.0602 | 2.47E-01 | 3.72E-01 |
| TNS3     | -0.0689 | 1.85E-01 | 2.98E-01 |
| TNS4     | -0.0220 | 6.73E-01 | 7.72E-01 |
| TNXB     | -0.1579 | 2.29E-03 | 8.62E-03 |
| TOB1     | -0.0193 | 7.10E-01 | 8.02E-01 |
| TOB2     | 0.0779  | 1.34E-01 | 2.33E-01 |
| TOE1     | 0.1804  | 4.81E-04 | 2.30E-03 |
| TOLLIP   | -0.2934 | 8.46E-09 | 1.59E-07 |
| TOM1L1   | -0.0140 | 7.88E-01 | 8.59E-01 |
| TOM1L2   | 0.0109  | 8.34E-01 | 8.91E-01 |
| TOM1     | -0.0818 | 1.16E-01 | 2.09E-01 |
| TOMM20L  | 0.0677  | 1.93E-01 | 3.08E-01 |
| TOMM20   | 0.2547  | 6.64E-07 | 7.88E-06 |

|          |         |          |          |
|----------|---------|----------|----------|
| TOMM22   | 0.0997  | 5.51E-02 | 1.16E-01 |
| TOMM34   | 0.0802  | 1.23E-01 | 2.18E-01 |
| TOMM40L  | 0.2751  | 7.24E-08 | 1.09E-06 |
| TOMM40   | 0.1504  | 3.68E-03 | 1.28E-02 |
| TOMM5    | 0.2489  | 1.21E-06 | 1.34E-05 |
| TOMM6    | 0.1653  | 1.40E-03 | 5.69E-03 |
| TOMM70A  | -0.1590 | 2.13E-03 | 8.12E-03 |
| TOMM7    | 0.0504  | 3.33E-01 | 4.64E-01 |
| TOP1MT   | 0.0286  | 5.83E-01 | 6.99E-01 |
| TOP1P1   | 0.0533  | 3.06E-01 | 4.36E-01 |
| TOP1P2   | 0.0810  | 1.19E-01 | 2.14E-01 |
| TOP1     | -0.0198 | 7.04E-01 | 7.97E-01 |
| TOP2A    | 0.4327  | 2.33E-18 | 3.69E-16 |
| TOP2B    | 0.1436  | 5.59E-03 | 1.81E-02 |
| TOP3A    | 0.1016  | 5.05E-02 | 1.08E-01 |
| TOP3B    | 0.3086  | 1.26E-09 | 2.92E-08 |
| TOPBP1   | 0.3325  | 4.99E-11 | 1.57E-09 |
| TOPORS   | -0.0014 | 9.79E-01 | 9.86E-01 |
| TOR1AIP1 | 0.0975  | 6.06E-02 | 1.25E-01 |
| TOR1AIP2 | 0.0109  | 8.34E-01 | 8.92E-01 |
| TOR1A    | 0.0135  | 7.96E-01 | 8.65E-01 |
| TOR1B    | -0.0039 | 9.40E-01 | 9.63E-01 |
| TOR2A    | 0.0898  | 8.41E-02 | 1.62E-01 |
| TOR3A    | 0.3257  | 1.28E-10 | 3.68E-09 |
| TOX2     | 0.0106  | 8.39E-01 | 8.94E-01 |
| TOX3     | 0.0296  | 5.69E-01 | 6.87E-01 |
| TOX4     | 0.1235  | 1.73E-02 | 4.56E-02 |
| TOX      | -0.0040 | 9.39E-01 | 9.62E-01 |
| TP53AIP1 | 0.1365  | 8.47E-03 | 2.55E-02 |
| TP53BP1  | 0.1398  | 7.02E-03 | 2.18E-02 |
| TP53BP2  | 0.2274  | 9.72E-06 | 8.20E-05 |
| TP53I11  | 0.0087  | 8.68E-01 | 9.15E-01 |
| TP53I13  | 0.1939  | 1.71E-04 | 9.63E-04 |
| TP53I3   | -0.0422 | 4.18E-01 | 5.51E-01 |
| TP53INP1 | -0.0265 | 6.10E-01 | 7.22E-01 |
| TP53INP2 | -0.2039 | 7.63E-05 | 4.85E-04 |
| TP53RK   | 0.0711  | 1.72E-01 | 2.82E-01 |
| TP53TG1  | -0.1821 | 4.23E-04 | 2.07E-03 |
| TP53TG3B | 0.1233  | 1.75E-02 | 4.60E-02 |
| TP53TG5  | 0.0316  | 5.44E-01 | 6.65E-01 |
| TP53     | 0.1688  | 1.10E-03 | 4.65E-03 |
| TP63     | -0.0606 | 2.44E-01 | 3.68E-01 |
| TP73     | 0.1954  | 1.52E-04 | 8.70E-04 |
| TPBG     | 0.0959  | 6.51E-02 | 1.32E-01 |



|         |         |          |          |
|---------|---------|----------|----------|
| TPCN1   | 0.0107  | 8.37E-01 | 8.93E-01 |
| TPCN2   | -0.0262 | 6.15E-01 | 7.25E-01 |
| TPD52L1 | -0.1041 | 4.52E-02 | 9.92E-02 |
| TPD52L2 | 0.2401  | 2.90E-06 | 2.87E-05 |
| TPD52L3 | 0.0203  | 6.97E-01 | 7.91E-01 |
| TPD52   | 0.0594  | 2.54E-01 | 3.79E-01 |
| TPH1    | 0.1270  | 1.44E-02 | 3.94E-02 |
| TPH2    | -0.0553 | 2.88E-01 | 4.17E-01 |
| TPI1P2  | -0.1715 | 9.09E-04 | 3.96E-03 |
| TPI1P3  | 0.0227  | 6.63E-01 | 7.64E-01 |
| TPI1    | -0.0381 | 4.64E-01 | 5.94E-01 |
| TPK1    | -0.2238 | 1.35E-05 | 1.09E-04 |
| TPM1    | -0.0546 | 2.94E-01 | 4.23E-01 |
| TPM2    | 0.0294  | 5.72E-01 | 6.89E-01 |
| TPM3    | 0.5664  | 7.28E-33 | 8.53E-30 |
| TPM4    | 0.1328  | 1.04E-02 | 3.02E-02 |
| TPMT    | -0.2157 | 2.79E-05 | 2.06E-04 |
| TPO     | -0.0484 | 3.53E-01 | 4.85E-01 |
| TPP1    | -0.1934 | 1.78E-04 | 9.98E-04 |
| TPP2    | 0.1105  | 3.33E-02 | 7.78E-02 |
| TPPP2   | -0.3311 | 6.11E-11 | 1.88E-09 |
| TPPP3   | -0.0035 | 9.47E-01 | 9.67E-01 |
| TPPP    | -0.0327 | 5.30E-01 | 6.53E-01 |
| TPRA1   | 0.0564  | 2.79E-01 | 4.07E-01 |
| TPRG1L  | -0.2579 | 4.73E-07 | 5.83E-06 |
| TPRG1   | -0.2583 | 4.57E-07 | 5.66E-06 |
| TPRKB   | 0.2957  | 6.40E-09 | 1.25E-07 |
| TPRN    | 0.1913  | 2.11E-04 | 1.15E-03 |
| TPRX1   | -0.0303 | 5.61E-01 | 6.79E-01 |
| TPRXL   | 0.0995  | 5.54E-02 | 1.17E-01 |
| TPR     | 0.3595  | 9.30E-13 | 4.18E-11 |
| TPSAB1  | -0.1611 | 1.85E-03 | 7.21E-03 |
| TPSB2   | -0.1425 | 5.98E-03 | 1.91E-02 |
| TPSD1   | -0.0362 | 4.87E-01 | 6.15E-01 |
| TPSG1   | -0.0373 | 4.74E-01 | 6.03E-01 |
| TPST1   | -0.1202 | 2.06E-02 | 5.25E-02 |
| TPST2   | -0.0324 | 5.34E-01 | 6.56E-01 |
| TPT1    | -0.1469 | 4.57E-03 | 1.53E-02 |
| TPTE2P1 | 0.0912  | 7.93E-02 | 1.55E-01 |
| TPTE2P3 | 0.1610  | 1.87E-03 | 7.27E-03 |
| TPTE2   | 0.0127  | 8.07E-01 | 8.73E-01 |
| TPTE    | 0.1330  | 1.04E-02 | 3.01E-02 |
| TPX2    | 0.4222  | 1.80E-17 | 2.25E-15 |
| TRA2A   | 0.1853  | 3.33E-04 | 1.70E-03 |

|           |         |          |          |
|-----------|---------|----------|----------|
| TRA2B     | 0.2802  | 4.05E-08 | 6.47E-07 |
| TRABD     | 0.1273  | 1.42E-02 | 3.89E-02 |
| TRADD     | -0.0860 | 9.83E-02 | 1.83E-01 |
| TRAF1     | 0.1216  | 1.91E-02 | 4.95E-02 |
| TRAF2     | 0.4404  | 4.94E-19 | 9.94E-17 |
| TRAF3IP1  | 0.0051  | 9.21E-01 | 9.50E-01 |
| TRAF3IP2  | 0.0076  | 8.83E-01 | 9.25E-01 |
| TRAF3IP3  | -0.0532 | 3.07E-01 | 4.36E-01 |
| TRAF3     | 0.0502  | 3.35E-01 | 4.66E-01 |
| TRAF4     | 0.1281  | 1.36E-02 | 3.76E-02 |
| TRAF5     | 0.3266  | 1.14E-10 | 3.30E-09 |
| TRAF6     | -0.0184 | 7.24E-01 | 8.13E-01 |
| TRAF7     | 0.0219  | 6.75E-01 | 7.73E-01 |
| TRAFD1    | 0.2110  | 4.18E-05 | 2.91E-04 |
| TRAIP     | 0.3929  | 3.81E-15 | 2.71E-13 |
| TRAK1     | 0.0794  | 1.27E-01 | 2.23E-01 |
| TRAK2     | 0.0737  | 1.57E-01 | 2.62E-01 |
| TRAM1L1   | 0.2769  | 5.92E-08 | 9.07E-07 |
| TRAM1     | -0.0963 | 6.40E-02 | 1.31E-01 |
| TRAM2     | -0.0714 | 1.70E-01 | 2.79E-01 |
| TRANK1    | -0.2032 | 8.08E-05 | 5.09E-04 |
| TRAP1     | -0.0762 | 1.43E-01 | 2.45E-01 |
| TRAPPC10  | -0.0435 | 4.04E-01 | 5.37E-01 |
| TRAPPC1   | -0.0217 | 6.78E-01 | 7.76E-01 |
| TRAPPC2L  | -0.1423 | 6.04E-03 | 1.93E-02 |
| TRAPPC2P1 | 0.1375  | 8.02E-03 | 2.44E-02 |
| TRAPPC2   | 0.1060  | 4.13E-02 | 9.25E-02 |
| TRAPPC3   | -0.0056 | 9.15E-01 | 9.47E-01 |
| TRAPPC4   | 0.1898  | 2.35E-04 | 1.27E-03 |
| TRAPPC5   | -0.0985 | 5.80E-02 | 1.21E-01 |
| TRAPPC6A  | -0.0226 | 6.65E-01 | 7.65E-01 |
| TRAPPC6B  | -0.1120 | 3.10E-02 | 7.33E-02 |
| TRAPPC9   | -0.0481 | 3.55E-01 | 4.88E-01 |
| TRAT1     | -0.0785 | 1.31E-01 | 2.29E-01 |
| TRDMT1    | 0.1535  | 3.04E-03 | 1.09E-02 |
| TRDN      | 0.0226  | 6.65E-01 | 7.65E-01 |
| TREH      | -0.1985 | 1.19E-04 | 7.08E-04 |
| TREM1     | 0.1582  | 2.24E-03 | 8.46E-03 |
| TREM2     | 0.0851  | 1.02E-01 | 1.88E-01 |
| TREML1    | 0.1031  | 4.72E-02 | 1.03E-01 |
| TREML2P1  | 0.0461  | 3.76E-01 | 5.10E-01 |
| TREML2    | 0.0251  | 6.30E-01 | 7.38E-01 |
| TREML3    | 0.1158  | 2.57E-02 | 6.29E-02 |
| TREML4    | 0.0456  | 3.82E-01 | 5.15E-01 |

|         |         |          |          |
|---------|---------|----------|----------|
| TRERF1  | -0.0396 | 4.46E-01 | 5.78E-01 |
| TREX1   | -0.0180 | 7.30E-01 | 8.17E-01 |
| TREX2   | 0.0986  | 5.79E-02 | 1.21E-01 |
| TRHDE   | -0.0804 | 1.22E-01 | 2.17E-01 |
| TRHR    | -0.0255 | 6.24E-01 | 7.33E-01 |
| TRH     | 0.0781  | 1.33E-01 | 2.32E-01 |
| TRIAP1  | -0.0800 | 1.24E-01 | 2.19E-01 |
| TRIB1   | -0.0089 | 8.64E-01 | 9.12E-01 |
| TRIB2   | -0.0237 | 6.49E-01 | 7.53E-01 |
| TRIB3   | 0.1071  | 3.93E-02 | 8.89E-02 |
| TRIL    | -0.1203 | 2.04E-02 | 5.22E-02 |
| TRIM10  | 0.0239  | 6.46E-01 | 7.51E-01 |
| TRIM11  | 0.4289  | 4.88E-18 | 6.95E-16 |
| TRIM13  | 0.0728  | 1.62E-01 | 2.69E-01 |
| TRIM14  | -0.0485 | 3.52E-01 | 4.84E-01 |
| TRIM15  | 0.0530  | 3.08E-01 | 4.38E-01 |
| TRIM16L | 0.0890  | 8.69E-02 | 1.66E-01 |
| TRIM16  | 0.1483  | 4.20E-03 | 1.43E-02 |
| TRIM17  | 0.2951  | 6.90E-09 | 1.33E-07 |
| TRIM21  | 0.0327  | 5.31E-01 | 6.53E-01 |
| TRIM22  | -0.1585 | 2.20E-03 | 8.34E-03 |
| TRIM23  | -0.0851 | 1.02E-01 | 1.88E-01 |
| TRIM24  | 0.0905  | 8.17E-02 | 1.58E-01 |
| TRIM25  | 0.2504  | 1.03E-06 | 1.16E-05 |
| TRIM26  | 0.0030  | 9.55E-01 | 9.72E-01 |
| TRIM27  | 0.1074  | 3.87E-02 | 8.78E-02 |
| TRIM28  | 0.2368  | 4.01E-06 | 3.85E-05 |
| TRIM29  | 0.0852  | 1.02E-01 | 1.88E-01 |
| TRIM2   | -0.1749 | 7.15E-04 | 3.22E-03 |
| TRIM31  | 0.1878  | 2.75E-04 | 1.44E-03 |
| TRIM32  | 0.2491  | 1.18E-06 | 1.32E-05 |
| TRIM33  | 0.0687  | 1.87E-01 | 3.00E-01 |
| TRIM34  | -0.0377 | 4.69E-01 | 5.98E-01 |
| TRIM35  | -0.1455 | 4.97E-03 | 1.64E-02 |
| TRIM36  | -0.0203 | 6.97E-01 | 7.91E-01 |
| TRIM37  | 0.2436  | 2.06E-06 | 2.15E-05 |
| TRIM38  | -0.1126 | 3.02E-02 | 7.18E-02 |
| TRIM39  | 0.0804  | 1.22E-01 | 2.17E-01 |
| TRIM3   | 0.1017  | 5.03E-02 | 1.08E-01 |
| TRIM40  | 0.0422  | 4.17E-01 | 5.50E-01 |
| TRIM41  | -0.1472 | 4.50E-03 | 1.51E-02 |
| TRIM42  | 0.0586  | 2.61E-01 | 3.87E-01 |
| TRIM43  | -0.0609 | 2.42E-01 | 3.66E-01 |
| TRIM44  | -0.1340 | 9.77E-03 | 2.87E-02 |

|              |         |          |          |
|--------------|---------|----------|----------|
| TRIM45       | 0.4296  | 4.31E-18 | 6.31E-16 |
| TRIM46       | 0.1864  | 3.06E-04 | 1.59E-03 |
| TRIM47       | 0.2403  | 2.85E-06 | 2.83E-05 |
| TRIM48       | -0.0503 | 3.34E-01 | 4.65E-01 |
| TRIM49L      | -0.0675 | 1.94E-01 | 3.10E-01 |
| TRIM49       | 0.0111  | 8.31E-01 | 8.89E-01 |
| TRIM4        | -0.1460 | 4.83E-03 | 1.60E-02 |
| TRIM50       | 0.1816  | 4.38E-04 | 2.13E-03 |
| TRIM52       | 0.1787  | 5.45E-04 | 2.56E-03 |
| TRIM53       | 0.0397  | 4.45E-01 | 5.77E-01 |
| TRIM54       | 0.1751  | 7.03E-04 | 3.18E-03 |
| TRIM55       | -0.1874 | 2.84E-04 | 1.49E-03 |
| TRIM56       | -0.0958 | 6.54E-02 | 1.33E-01 |
| TRIM58       | -0.1263 | 1.49E-02 | 4.05E-02 |
| TRIM59       | 0.3580  | 1.16E-12 | 5.09E-11 |
| TRIM5        | -0.1709 | 9.47E-04 | 4.11E-03 |
| TRIM6-TRIM34 | -0.0166 | 7.50E-01 | 8.32E-01 |
| TRIM60       | 0.0530  | 3.09E-01 | 4.38E-01 |
| TRIM61       | -0.0090 | 8.63E-01 | 9.11E-01 |
| TRIM62       | 0.0152  | 7.71E-01 | 8.46E-01 |
| TRIM63       | -0.1337 | 9.93E-03 | 2.91E-02 |
| TRIM65       | 0.2938  | 8.04E-09 | 1.52E-07 |
| TRIM66       | 0.0377  | 4.69E-01 | 5.99E-01 |
| TRIM67       | 0.3162  | 4.63E-10 | 1.19E-08 |
| TRIM68       | 0.1351  | 9.18E-03 | 2.73E-02 |
| TRIM69       | -0.1122 | 3.08E-02 | 7.29E-02 |
| TRIM6        | 0.0591  | 2.56E-01 | 3.82E-01 |
| TRIM71       | 0.1170  | 2.42E-02 | 6.00E-02 |
| TRIM72       | 0.1880  | 2.71E-04 | 1.43E-03 |
| TRIM74       | 0.0494  | 3.42E-01 | 4.74E-01 |
| TRIM77       | -0.0053 | 9.19E-01 | 9.49E-01 |
| TRIM78P      | 0.0651  | 2.11E-01 | 3.29E-01 |
| TRIM7        | 0.1005  | 5.30E-02 | 1.12E-01 |
| TRIM8        | -0.0898 | 8.42E-02 | 1.62E-01 |
| TRIM9        | -0.0303 | 5.61E-01 | 6.79E-01 |
| TRIML1       | -0.1153 | 2.63E-02 | 6.43E-02 |
| TRIML2       | -0.0246 | 6.37E-01 | 7.44E-01 |
| TRIOBP       | 0.0664  | 2.02E-01 | 3.19E-01 |
| TRIO         | 0.0426  | 4.13E-01 | 5.46E-01 |
| TRIP10       | 0.1323  | 1.07E-02 | 3.09E-02 |
| TRIP11       | -0.1011 | 5.17E-02 | 1.10E-01 |
| TRIP12       | 0.0265  | 6.11E-01 | 7.22E-01 |
| TRIP13       | 0.3791  | 3.95E-14 | 2.29E-12 |
| TRIP4        | 0.2543  | 6.95E-07 | 8.18E-06 |

|          |         |          |          |
|----------|---------|----------|----------|
| TRIP6    | -0.0521 | 3.17E-01 | 4.47E-01 |
| TRIT1    | 0.1180  | 2.31E-02 | 5.77E-02 |
| TRMT112  | 0.1345  | 9.48E-03 | 2.80E-02 |
| TRMT11   | 0.0043  | 9.34E-01 | 9.59E-01 |
| TRMT12   | 0.0814  | 1.18E-01 | 2.11E-01 |
| TRMT1    | 0.1875  | 2.82E-04 | 1.48E-03 |
| TRMT2A   | 0.2103  | 4.45E-05 | 3.06E-04 |
| TRMT2B   | 0.1870  | 2.92E-04 | 1.53E-03 |
| TRMT5    | 0.0389  | 4.55E-01 | 5.86E-01 |
| TRMT61A  | 0.0191  | 7.14E-01 | 8.05E-01 |
| TRMT61B  | 0.0855  | 1.00E-01 | 1.86E-01 |
| TRMT6    | 0.2301  | 7.57E-06 | 6.58E-05 |
| TRMU     | 0.1336  | 9.99E-03 | 2.92E-02 |
| TRNAU1AP | 0.2446  | 1.86E-06 | 1.97E-05 |
| TRNP1    | 0.0970  | 6.19E-02 | 1.27E-01 |
| TRNT1    | -0.0080 | 8.77E-01 | 9.21E-01 |
| TROAP    | 0.4390  | 6.59E-19 | 1.26E-16 |
| TROVE2   | 0.3454  | 7.77E-12 | 2.85E-10 |
| TRO      | -0.0462 | 3.75E-01 | 5.08E-01 |
| TRPA1    | 0.1182  | 2.27E-02 | 5.70E-02 |
| TRPC1    | 0.1575  | 2.34E-03 | 8.78E-03 |
| TRPC2    | 0.0667  | 2.00E-01 | 3.16E-01 |
| TRPC3    | 0.1326  | 1.06E-02 | 3.06E-02 |
| TRPC4AP  | 0.0589  | 2.58E-01 | 3.84E-01 |
| TRPC4    | -0.1481 | 4.24E-03 | 1.44E-02 |
| TRPC5    | -0.2043 | 7.38E-05 | 4.71E-04 |
| TRPC6    | -0.0363 | 4.86E-01 | 6.14E-01 |
| TRPC7    | 0.0042  | 9.36E-01 | 9.60E-01 |
| TRPM1    | -0.0665 | 2.01E-01 | 3.17E-01 |
| TRPM2    | 0.0905  | 8.16E-02 | 1.58E-01 |
| TRPM3    | -0.0404 | 4.38E-01 | 5.69E-01 |
| TRPM4    | -0.1050 | 4.32E-02 | 9.59E-02 |
| TRPM5    | 0.1106  | 3.32E-02 | 7.76E-02 |
| TRPM6    | -0.0670 | 1.98E-01 | 3.14E-01 |
| TRPM7    | -0.0919 | 7.69E-02 | 1.51E-01 |
| TRPM8    | -0.0343 | 5.11E-01 | 6.35E-01 |
| TRPS1    | -0.0560 | 2.82E-01 | 4.10E-01 |
| TRPT1    | 0.0445  | 3.93E-01 | 5.26E-01 |
| TRPV1    | -0.0130 | 8.03E-01 | 8.70E-01 |
| TRPV2    | -0.0332 | 5.24E-01 | 6.48E-01 |
| TRPV3    | -0.0597 | 2.51E-01 | 3.76E-01 |
| TRPV4    | -0.0425 | 4.14E-01 | 5.47E-01 |
| TRPV5    | 0.0981  | 5.90E-02 | 1.22E-01 |
| TRPV6    | 0.1182  | 2.27E-02 | 5.70E-02 |

|             |         |          |          |
|-------------|---------|----------|----------|
| TRRAP       | 0.0451  | 3.86E-01 | 5.19E-01 |
| TRUB1       | -0.1282 | 1.35E-02 | 3.74E-02 |
| TRUB2       | -0.0802 | 1.23E-01 | 2.18E-01 |
| TRY6        | 0.0400  | 4.43E-01 | 5.75E-01 |
| TRYX3       | 0.1314  | 1.13E-02 | 3.23E-02 |
| TSC1        | 0.3594  | 9.35E-13 | 4.20E-11 |
| TSC22D1     | -0.1557 | 2.63E-03 | 9.68E-03 |
| TSC22D2     | -0.1010 | 5.19E-02 | 1.11E-01 |
| TSC22D3     | -0.1009 | 5.22E-02 | 1.11E-01 |
| TSC22D4     | 0.0298  | 5.68E-01 | 6.85E-01 |
| TSC2        | 0.0757  | 1.46E-01 | 2.48E-01 |
| TSEN15      | 0.3410  | 1.49E-11 | 5.14E-10 |
| TSEN2       | 0.1228  | 1.79E-02 | 4.70E-02 |
| TSEN34      | 0.1701  | 1.00E-03 | 4.32E-03 |
| TSEN54      | 0.3466  | 6.49E-12 | 2.43E-10 |
| TSFM        | -0.1169 | 2.44E-02 | 6.03E-02 |
| TSG101      | 0.1013  | 5.13E-02 | 1.10E-01 |
| TSG1        | -0.1049 | 4.34E-02 | 9.62E-02 |
| TSGA10IP    | 0.0383  | 4.62E-01 | 5.92E-01 |
| TSGA10      | 0.0194  | 7.10E-01 | 8.02E-01 |
| TSGA13      | -0.0184 | 7.24E-01 | 8.12E-01 |
| TSGA14      | 0.0955  | 6.61E-02 | 1.34E-01 |
| TSHB        | -0.0319 | 5.40E-01 | 6.62E-01 |
| TSHR        | 0.0532  | 3.06E-01 | 4.36E-01 |
| TSHZ1       | -0.0014 | 9.79E-01 | 9.86E-01 |
| TSHZ2       | -0.0285 | 5.84E-01 | 7.00E-01 |
| TSHZ3       | -0.1402 | 6.86E-03 | 2.14E-02 |
| TSIX        | 0.0672  | 1.97E-01 | 3.12E-01 |
| TSKS        | 0.0821  | 1.14E-01 | 2.06E-01 |
| TSKU        | -0.1822 | 4.21E-04 | 2.06E-03 |
| TSLP        | -0.2295 | 8.01E-06 | 6.90E-05 |
| TSNARE1     | 0.1561  | 2.56E-03 | 9.46E-03 |
| TSNAX-DISC1 | -0.0319 | 5.40E-01 | 6.62E-01 |
| TSNAXIP1    | -0.0732 | 1.59E-01 | 2.65E-01 |
| TSNAX       | 0.2108  | 4.26E-05 | 2.95E-04 |
| TSN         | 0.2645  | 2.34E-07 | 3.11E-06 |
| TSPAN10     | 0.0263  | 6.14E-01 | 7.24E-01 |
| TSPAN11     | -0.0606 | 2.44E-01 | 3.69E-01 |
| TSPAN12     | -0.1183 | 2.27E-02 | 5.70E-02 |
| TSPAN13     | -0.0108 | 8.36E-01 | 8.92E-01 |
| TSPAN14     | -0.0324 | 5.33E-01 | 6.56E-01 |
| TSPAN15     | 0.1257  | 1.54E-02 | 4.15E-02 |
| TSPAN16     | 0.0518  | 3.19E-01 | 4.49E-01 |
| TSPAN17     | 0.0160  | 7.58E-01 | 8.38E-01 |

|         |         |          |          |
|---------|---------|----------|----------|
| TSPAN18 | -0.1547 | 2.81E-03 | 1.02E-02 |
| TSPAN19 | 0.1211  | 1.97E-02 | 5.07E-02 |
| TSPAN1  | -0.1171 | 2.41E-02 | 5.98E-02 |
| TSPAN2  | -0.1044 | 4.44E-02 | 9.79E-02 |
| TSPAN31 | -0.3807 | 3.03E-14 | 1.79E-12 |
| TSPAN32 | 0.0084  | 8.73E-01 | 9.18E-01 |
| TSPAN33 | -0.0818 | 1.16E-01 | 2.08E-01 |
| TSPAN3  | 0.0775  | 1.36E-01 | 2.36E-01 |
| TSPAN4  | -0.1336 | 9.99E-03 | 2.92E-02 |
| TSPAN5  | -0.0391 | 4.53E-01 | 5.84E-01 |
| TSPAN6  | -0.0713 | 1.70E-01 | 2.80E-01 |
| TSPAN7  | 0.0118  | 8.21E-01 | 8.82E-01 |
| TSPAN8  | 0.0309  | 5.53E-01 | 6.72E-01 |
| TSPAN9  | -0.2621 | 3.05E-07 | 3.96E-06 |
| TSPO2   | 0.0277  | 5.95E-01 | 7.09E-01 |
| TSPO    | -0.0209 | 6.88E-01 | 7.84E-01 |
| TSPY1   | -0.0314 | 5.47E-01 | 6.67E-01 |
| TSPY2   | -0.0022 | 9.67E-01 | 9.80E-01 |
| TSPY3   | -0.0107 | 8.37E-01 | 8.93E-01 |
| TSPY4   | -0.0575 | 2.70E-01 | 3.97E-01 |
| TSPYL1  | -0.1820 | 4.25E-04 | 2.08E-03 |
| TSPYL2  | 0.1422  | 6.08E-03 | 1.94E-02 |
| TSPYL3  | 0.0453  | 3.84E-01 | 5.18E-01 |
| TSPYL4  | 0.0388  | 4.57E-01 | 5.87E-01 |
| TSPYL5  | -0.1460 | 4.85E-03 | 1.61E-02 |
| TSPYL6  | 0.0776  | 1.36E-01 | 2.35E-01 |
| TSR1    | 0.0149  | 7.75E-01 | 8.49E-01 |
| TSR2    | -0.0122 | 8.15E-01 | 8.78E-01 |
| TSSC1   | 0.1548  | 2.79E-03 | 1.02E-02 |
| TSSC4   | 0.1298  | 1.24E-02 | 3.47E-02 |
| TSSK1B  | -0.1080 | 3.76E-02 | 8.58E-02 |
| TSSK3   | 0.1010  | 5.18E-02 | 1.11E-01 |
| TSSK4   | 0.0625  | 2.30E-01 | 3.53E-01 |
| TSSK6   | 0.0195  | 7.08E-01 | 8.01E-01 |
| TSTA3   | -0.0582 | 2.63E-01 | 3.90E-01 |
| TSTD1   | 0.0211  | 6.85E-01 | 7.82E-01 |
| TSTD2   | -0.0304 | 5.59E-01 | 6.77E-01 |
| TST     | -0.3052 | 1.93E-09 | 4.31E-08 |
| TTBK1   | -0.0291 | 5.76E-01 | 6.93E-01 |
| TTBK2   | -0.0828 | 1.11E-01 | 2.02E-01 |
| TTC12   | 0.0608  | 2.43E-01 | 3.67E-01 |
| TTC13   | 0.4365  | 1.08E-18 | 1.92E-16 |
| TTC14   | 0.1865  | 3.05E-04 | 1.58E-03 |
| TTC15   | -0.0473 | 3.63E-01 | 4.96E-01 |

|        |         |          |          |
|--------|---------|----------|----------|
| TTC16  | 0.0144  | 7.83E-01 | 8.55E-01 |
| TTC17  | -0.0558 | 2.84E-01 | 4.13E-01 |
| TTC18  | -0.0047 | 9.29E-01 | 9.55E-01 |
| TTC19  | -0.1599 | 2.00E-03 | 7.70E-03 |
| TTC1   | 0.0384  | 4.60E-01 | 5.91E-01 |
| TTC21A | 0.1239  | 1.70E-02 | 4.50E-02 |
| TTC21B | 0.1978  | 1.26E-04 | 7.42E-04 |
| TTC22  | 0.1075  | 3.85E-02 | 8.74E-02 |
| TTC23L | 0.1251  | 1.59E-02 | 4.26E-02 |
| TTC23  | 0.0169  | 7.46E-01 | 8.28E-01 |
| TTC24  | 0.0237  | 6.49E-01 | 7.53E-01 |
| TTC25  | 0.0369  | 4.79E-01 | 6.08E-01 |
| TTC26  | 0.1350  | 9.23E-03 | 2.74E-02 |
| TTC27  | 0.2492  | 1.17E-06 | 1.30E-05 |
| TTC28  | -0.0320 | 5.39E-01 | 6.60E-01 |
| TTC29  | 0.0693  | 1.83E-01 | 2.95E-01 |
| TTC30A | 0.0521  | 3.17E-01 | 4.47E-01 |
| TTC30B | 0.1002  | 5.39E-02 | 1.14E-01 |
| TTC31  | 0.0475  | 3.62E-01 | 4.94E-01 |
| TTC32  | 0.1027  | 4.82E-02 | 1.04E-01 |
| TTC33  | 0.0453  | 3.85E-01 | 5.18E-01 |
| TTC35  | 0.0512  | 3.25E-01 | 4.56E-01 |
| TTC36  | -0.3377 | 2.41E-11 | 8.03E-10 |
| TTC37  | -0.0575 | 2.69E-01 | 3.97E-01 |
| TTC38  | -0.3020 | 2.92E-09 | 6.18E-08 |
| TTC39A | 0.1545  | 2.85E-03 | 1.04E-02 |
| TTC39B | -0.0596 | 2.52E-01 | 3.78E-01 |
| TTC39C | -0.0774 | 1.37E-01 | 2.36E-01 |
| TTC3   | 0.0088  | 8.66E-01 | 9.13E-01 |
| TTC4   | 0.1685  | 1.12E-03 | 4.76E-03 |
| TTC5   | 0.0294  | 5.72E-01 | 6.89E-01 |
| TTC7A  | 0.1255  | 1.56E-02 | 4.19E-02 |
| TTC7B  | -0.1837 | 3.75E-04 | 1.88E-03 |
| TTC8   | -0.0828 | 1.11E-01 | 2.02E-01 |
| TTC9B  | 0.0307  | 5.55E-01 | 6.74E-01 |
| TTC9C  | 0.1609  | 1.88E-03 | 7.32E-03 |
| TTC9   | -0.1508 | 3.60E-03 | 1.26E-02 |
| TTF1   | 0.3463  | 6.88E-12 | 2.57E-10 |
| TTF2   | 0.2581  | 4.64E-07 | 5.73E-06 |
| TTK    | 0.4683  | 1.28E-21 | 3.93E-19 |
| TTLL10 | -0.0429 | 4.10E-01 | 5.43E-01 |
| TTLL11 | 0.0483  | 3.53E-01 | 4.85E-01 |
| TTLL12 | 0.0076  | 8.84E-01 | 9.25E-01 |
| TTLL13 | -0.0348 | 5.04E-01 | 6.29E-01 |



|        |         |          |          |
|--------|---------|----------|----------|
| TTLL1  | 0.1503  | 3.71E-03 | 1.29E-02 |
| TTLL2  | 0.0535  | 3.04E-01 | 4.33E-01 |
| TTLL3  | 0.2483  | 1.29E-06 | 1.42E-05 |
| TTLL4  | 0.3270  | 1.07E-10 | 3.12E-09 |
| TTLL5  | 0.1052  | 4.29E-02 | 9.54E-02 |
| TTLL6  | 0.1243  | 1.66E-02 | 4.42E-02 |
| TTLL7  | 0.1301  | 1.21E-02 | 3.42E-02 |
| TTLL8  | 0.0271  | 6.02E-01 | 7.15E-01 |
| TTLL9  | 0.1578  | 2.31E-03 | 8.68E-03 |
| TTL    | -0.0387 | 4.57E-01 | 5.88E-01 |
| TTN    | 0.1708  | 9.56E-04 | 4.14E-03 |
| TTPAL  | -0.1539 | 2.95E-03 | 1.07E-02 |
| TTPA   | -0.2174 | 2.41E-05 | 1.82E-04 |
| TTR    | -0.1467 | 4.64E-03 | 1.55E-02 |
| TTY10  | -0.0768 | 1.40E-01 | 2.40E-01 |
| TTY14  | -0.0519 | 3.19E-01 | 4.49E-01 |
| TTY15  | 0.0229  | 6.60E-01 | 7.61E-01 |
| TTY1B  | 0.0637  | 2.21E-01 | 3.42E-01 |
| TTY20  | 0.0303  | 5.61E-01 | 6.79E-01 |
| TTY2   | 0.0805  | 1.22E-01 | 2.17E-01 |
| TTY4C  | -0.0587 | 2.59E-01 | 3.85E-01 |
| TTY5   | 0.0681  | 1.90E-01 | 3.04E-01 |
| TTY6B  | 0.0908  | 8.06E-02 | 1.57E-01 |
| TTY6   | -0.0119 | 8.19E-01 | 8.81E-01 |
| TTY8   | 0.0734  | 1.58E-01 | 2.64E-01 |
| TTY9B  | -0.0555 | 2.86E-01 | 4.15E-01 |
| TYH1   | 0.1121  | 3.08E-02 | 7.30E-02 |
| TYH2   | 0.0608  | 2.43E-01 | 3.67E-01 |
| TYH3   | 0.0737  | 1.56E-01 | 2.62E-01 |
| TUBA1A | 0.0650  | 2.11E-01 | 3.30E-01 |
| TUBA1B | 0.3581  | 1.15E-12 | 5.06E-11 |
| TUBA1C | 0.3165  | 4.46E-10 | 1.15E-08 |
| TUBA3C | 0.1261  | 1.51E-02 | 4.09E-02 |
| TUBA3D | 0.1370  | 8.23E-03 | 2.49E-02 |
| TUBA3E | 0.1576  | 2.33E-03 | 8.74E-03 |
| TUBA4A | 0.1430  | 5.79E-03 | 1.86E-02 |
| TUBA4B | 0.0326  | 5.31E-01 | 6.54E-01 |
| TUBA8  | 0.0474  | 3.62E-01 | 4.94E-01 |
| TUBAL3 | 0.1720  | 8.76E-04 | 3.84E-03 |
| TUBB1  | 0.0398  | 4.45E-01 | 5.77E-01 |
| TUBB2A | 0.0335  | 5.20E-01 | 6.44E-01 |
| TUBB2B | -0.0099 | 8.49E-01 | 9.02E-01 |
| TUBB2C | 0.2068  | 5.96E-05 | 3.92E-04 |
| TUBB3  | 0.0965  | 6.35E-02 | 1.30E-01 |

|         |         |          |          |
|---------|---------|----------|----------|
| TUBB4Q  | 0.1923  | 1.94E-04 | 1.07E-03 |
| TUBB4   | 0.0697  | 1.80E-01 | 2.92E-01 |
| TUBB6   | -0.0961 | 6.45E-02 | 1.32E-01 |
| TUBB8   | 0.2170  | 2.48E-05 | 1.87E-04 |
| TUBBP5  | 0.2214  | 1.69E-05 | 1.33E-04 |
| TUBB    | 0.2916  | 1.05E-08 | 1.95E-07 |
| TUBD1   | 0.4237  | 1.35E-17 | 1.76E-15 |
| TUBE1   | -0.1314 | 1.13E-02 | 3.23E-02 |
| TUBG1   | 0.3110  | 9.20E-10 | 2.19E-08 |
| TUBG2   | 0.2035  | 7.87E-05 | 4.98E-04 |
| TUBGCP2 | 0.0780  | 1.34E-01 | 2.32E-01 |
| TUBGCP3 | 0.2319  | 6.35E-06 | 5.70E-05 |
| TUBGCP4 | -0.0068 | 8.96E-01 | 9.34E-01 |
| TUBGCP5 | 0.0194  | 7.09E-01 | 8.01E-01 |
| TUBGCP6 | 0.1324  | 1.07E-02 | 3.08E-02 |
| TUB     | 0.1156  | 2.59E-02 | 6.35E-02 |
| TUFM    | -0.2119 | 3.90E-05 | 2.74E-04 |
| TUFT1   | 0.4903  | 7.90E-24 | 3.66E-21 |
| TUG1    | 0.3346  | 3.74E-11 | 1.21E-09 |
| TULP1   | 0.2064  | 6.17E-05 | 4.04E-04 |
| TULP2   | 0.0599  | 2.50E-01 | 3.75E-01 |
| TULP3   | 0.2315  | 6.63E-06 | 5.91E-05 |
| TULP4   | 0.1658  | 1.35E-03 | 5.54E-03 |
| TUSC1   | 0.0273  | 6.00E-01 | 7.13E-01 |
| TUSC2   | 0.0010  | 9.84E-01 | 9.90E-01 |
| TUSC3   | -0.0037 | 9.43E-01 | 9.64E-01 |
| TUSC5   | -0.1457 | 4.93E-03 | 1.63E-02 |
| TUT1    | -0.0490 | 3.47E-01 | 4.79E-01 |
| TWF1    | -0.0172 | 7.41E-01 | 8.25E-01 |
| TWF2    | 0.0945  | 6.91E-02 | 1.39E-01 |
| TWIST1  | 0.0220  | 6.72E-01 | 7.72E-01 |
| TWIST2  | -0.1578 | 2.30E-03 | 8.66E-03 |
| TWISTNB | 0.0194  | 7.10E-01 | 8.02E-01 |
| TWSG1   | -0.0597 | 2.51E-01 | 3.76E-01 |
| TXK     | -0.1404 | 6.78E-03 | 2.12E-02 |
| TXLNA   | 0.0388  | 4.56E-01 | 5.86E-01 |
| TXLNB   | 0.1041  | 4.52E-02 | 9.93E-02 |
| TXLNG   | 0.0430  | 4.09E-01 | 5.42E-01 |
| TXN2    | -0.1590 | 2.12E-03 | 8.09E-03 |
| TXNDC11 | -0.1193 | 2.15E-02 | 5.46E-02 |
| TXNDC12 | 0.0654  | 2.09E-01 | 3.27E-01 |
| TXNDC15 | -0.2351 | 4.71E-06 | 4.41E-05 |
| TXNDC16 | 0.0535  | 3.04E-01 | 4.33E-01 |
| TXNDC17 | -0.1065 | 4.04E-02 | 9.09E-02 |

|           |         |          |          |
|-----------|---------|----------|----------|
| TXNDC2    | 0.0504  | 3.33E-01 | 4.64E-01 |
| TXNDC3    | 0.0187  | 7.20E-01 | 8.10E-01 |
| TXNDC5    | -0.0316 | 5.43E-01 | 6.64E-01 |
| TXNDC6    | 0.1001  | 5.40E-02 | 1.14E-01 |
| TXNDC9    | 0.2246  | 1.26E-05 | 1.02E-04 |
| TXNIP     | -0.0608 | 2.42E-01 | 3.67E-01 |
| TXNL1     | -0.0753 | 1.48E-01 | 2.51E-01 |
| TXNL4A    | 0.0923  | 7.59E-02 | 1.50E-01 |
| TXNL4B    | -0.1685 | 1.12E-03 | 4.74E-03 |
| TXNRD1    | 0.0846  | 1.04E-01 | 1.91E-01 |
| TXNRD2    | -0.1125 | 3.03E-02 | 7.20E-02 |
| TXNRD3IT1 | -0.2744 | 7.81E-08 | 1.16E-06 |
| TXN       | 0.1842  | 3.62E-04 | 1.83E-03 |
| TYK2      | 0.0307  | 5.55E-01 | 6.75E-01 |
| TYMP      | -0.0175 | 7.36E-01 | 8.22E-01 |
| TYMS      | 0.3499  | 3.99E-12 | 1.59E-10 |
| TYRO3     | 0.2566  | 5.45E-07 | 6.59E-06 |
| TYROBP    | -0.0507 | 3.30E-01 | 4.61E-01 |
| TYRP1     | -0.0854 | 1.00E-01 | 1.86E-01 |
| TYR       | -0.0626 | 2.29E-01 | 3.51E-01 |
| TYSND1    | 0.1258  | 1.53E-02 | 4.14E-02 |
| TYW1B     | -0.0750 | 1.49E-01 | 2.53E-01 |
| TYW1      | -0.1205 | 2.02E-02 | 5.19E-02 |
| TYW3      | 0.0478  | 3.59E-01 | 4.91E-01 |
| T         | 0.0550  | 2.91E-01 | 4.20E-01 |
| U2AF1L4   | 0.2025  | 8.60E-05 | 5.36E-04 |
| U2AF1     | 0.3120  | 8.09E-10 | 1.96E-08 |
| U2AF2     | 0.3017  | 3.03E-09 | 6.39E-08 |
| UACA      | -0.0061 | 9.07E-01 | 9.41E-01 |
| UAP1L1    | 0.0970  | 6.20E-02 | 1.27E-01 |
| UAP1      | 0.2007  | 9.92E-05 | 6.05E-04 |
| UBA1      | -0.0320 | 5.39E-01 | 6.61E-01 |
| UBA2      | 0.3045  | 2.12E-09 | 4.66E-08 |
| UBA3      | 0.0406  | 4.36E-01 | 5.67E-01 |
| UBA52     | 0.0666  | 2.01E-01 | 3.17E-01 |
| UBA5      | -0.1253 | 1.57E-02 | 4.22E-02 |
| UBA6      | -0.0038 | 9.42E-01 | 9.64E-01 |
| UBA7      | -0.1099 | 3.43E-02 | 7.97E-02 |
| UBAC1     | 0.0914  | 7.87E-02 | 1.54E-01 |
| UBAC2     | 0.1224  | 1.83E-02 | 4.78E-02 |
| UBAP1     | 0.0788  | 1.30E-01 | 2.27E-01 |
| UBAP2L    | 0.5365  | 4.85E-29 | 3.86E-26 |
| UBAP2     | 0.2791  | 4.59E-08 | 7.25E-07 |
| UBASH3A   | -0.0398 | 4.45E-01 | 5.77E-01 |

|          |         |          |          |
|----------|---------|----------|----------|
| UBASH3B  | 0.0402  | 4.40E-01 | 5.71E-01 |
| UBB      | -0.1727 | 8.37E-04 | 3.69E-03 |
| UBC      | -0.0437 | 4.01E-01 | 5.34E-01 |
| UBD      | 0.2010  | 9.68E-05 | 5.93E-04 |
| UBE2A    | 0.2286  | 8.69E-06 | 7.43E-05 |
| UBE2B    | -0.0241 | 6.43E-01 | 7.48E-01 |
| UBE2CBP  | 0.2479  | 1.34E-06 | 1.46E-05 |
| UBE2C    | 0.4119  | 1.26E-16 | 1.25E-14 |
| UBE2D1   | 0.1623  | 1.71E-03 | 6.77E-03 |
| UBE2D2   | 0.1799  | 4.98E-04 | 2.37E-03 |
| UBE2D3   | -0.2385 | 3.39E-06 | 3.31E-05 |
| UBE2D4   | -0.1830 | 3.95E-04 | 1.96E-03 |
| UBE2DNL  | -0.0102 | 8.44E-01 | 8.98E-01 |
| UBE2E1   | 0.3136  | 6.53E-10 | 1.61E-08 |
| UBE2E2   | -0.1855 | 3.28E-04 | 1.68E-03 |
| UBE2E3   | 0.1387  | 7.48E-03 | 2.30E-02 |
| UBE2F    | -0.1090 | 3.58E-02 | 8.24E-02 |
| UBE2G1   | -0.1351 | 9.18E-03 | 2.73E-02 |
| UBE2G2   | -0.0282 | 5.88E-01 | 7.03E-01 |
| UBE2H    | -0.2346 | 4.92E-06 | 4.58E-05 |
| UBE2I    | 0.3320  | 5.39E-11 | 1.68E-09 |
| UBE2J1   | 0.1395  | 7.11E-03 | 2.20E-02 |
| UBE2J2   | 0.0913  | 7.90E-02 | 1.54E-01 |
| UBE2K    | 0.0789  | 1.29E-01 | 2.26E-01 |
| UBE2L3   | 0.1598  | 2.02E-03 | 7.78E-03 |
| UBE2L6   | -0.1467 | 4.64E-03 | 1.55E-02 |
| UBE2MP1  | 0.1493  | 3.95E-03 | 1.36E-02 |
| UBE2M    | 0.1641  | 1.52E-03 | 6.11E-03 |
| UBE2NL   | 0.0940  | 7.05E-02 | 1.41E-01 |
| UBE2N    | 0.1675  | 1.20E-03 | 5.02E-03 |
| UBE2O    | 0.3059  | 1.78E-09 | 4.01E-08 |
| UBE2Q1   | 0.5095  | 6.72E-26 | 4.06E-23 |
| UBE2Q2P1 | 0.0223  | 6.69E-01 | 7.68E-01 |
| UBE2Q2   | 0.0678  | 1.92E-01 | 3.07E-01 |
| UBE2QL1  | -0.2268 | 1.03E-05 | 8.62E-05 |
| UBE2R2   | 0.0969  | 6.22E-02 | 1.28E-01 |
| UBE2S    | 0.3048  | 2.04E-09 | 4.51E-08 |
| UBE2T    | 0.5240  | 1.48E-27 | 1.06E-24 |
| UBE2U    | 0.1302  | 1.21E-02 | 3.41E-02 |
| UBE2V1   | 0.1123  | 3.05E-02 | 7.25E-02 |
| UBE2V2   | -0.0062 | 9.05E-01 | 9.40E-01 |
| UBE2W    | -0.1281 | 1.36E-02 | 3.76E-02 |
| UBE2Z    | 0.3058  | 1.80E-09 | 4.05E-08 |
| UBE3A    | -0.1344 | 9.52E-03 | 2.81E-02 |

|        |         |          |          |
|--------|---------|----------|----------|
| UBE3B  | 0.0201  | 6.99E-01 | 7.92E-01 |
| UBE3C  | -0.1480 | 4.28E-03 | 1.45E-02 |
| UBE4A  | 0.0386  | 4.59E-01 | 5.89E-01 |
| UBE4B  | 0.0465  | 3.72E-01 | 5.05E-01 |
| UBFD1  | -0.0901 | 8.31E-02 | 1.60E-01 |
| UBIAD1 | -0.0980 | 5.94E-02 | 1.23E-01 |
| UBL3   | -0.1656 | 1.37E-03 | 5.60E-03 |
| UBL4A  | 0.1984  | 1.20E-04 | 7.13E-04 |
| UBL4B  | 0.1242  | 1.67E-02 | 4.43E-02 |
| UBL5   | 0.0275  | 5.98E-01 | 7.12E-01 |
| UBL7   | 0.0440  | 3.99E-01 | 5.31E-01 |
| UBLCP1 | 0.0497  | 3.40E-01 | 4.71E-01 |
| UBN1   | 0.2040  | 7.57E-05 | 4.82E-04 |
| UBN2   | 0.0804  | 1.22E-01 | 2.17E-01 |
| UBOX5  | 0.0590  | 2.57E-01 | 3.82E-01 |
| UBP1   | -0.0435 | 4.04E-01 | 5.37E-01 |
| UBQLN1 | 0.0668  | 1.99E-01 | 3.16E-01 |
| UBQLN2 | 0.0718  | 1.67E-01 | 2.76E-01 |
| UBQLN3 | 0.0465  | 3.72E-01 | 5.05E-01 |
| UBQLN4 | 0.3971  | 1.82E-15 | 1.38E-13 |
| UBQLNL | 0.1221  | 1.87E-02 | 4.86E-02 |
| UBR1   | -0.1045 | 4.42E-02 | 9.75E-02 |
| UBR2   | -0.0418 | 4.22E-01 | 5.55E-01 |
| UBR3   | -0.1058 | 4.17E-02 | 9.31E-02 |
| UBR4   | -0.0215 | 6.80E-01 | 7.78E-01 |
| UBR5   | 0.0801  | 1.23E-01 | 2.19E-01 |
| UBR7   | 0.1124  | 3.04E-02 | 7.23E-02 |
| UBTD1  | -0.1458 | 4.90E-03 | 1.62E-02 |
| UBTD2  | 0.0792  | 1.28E-01 | 2.24E-01 |
| UBTFL1 | 0.1099  | 3.44E-02 | 7.98E-02 |
| UBTF   | 0.2318  | 6.42E-06 | 5.74E-05 |
| UBXN10 | -0.1952 | 1.55E-04 | 8.86E-04 |
| UBXN11 | 0.1734  | 7.94E-04 | 3.53E-03 |
| UBXN1  | 0.0647  | 2.14E-01 | 3.33E-01 |
| UBXN2A | 0.1828  | 4.01E-04 | 1.99E-03 |
| UBXN2B | -0.0992 | 5.62E-02 | 1.18E-01 |
| UBXN4  | 0.0077  | 8.83E-01 | 9.25E-01 |
| UBXN6  | -0.2910 | 1.13E-08 | 2.08E-07 |
| UBXN7  | 0.0767  | 1.40E-01 | 2.41E-01 |
| UBXN8  | -0.1881 | 2.70E-04 | 1.42E-03 |
| UCA1   | 0.0202  | 6.98E-01 | 7.92E-01 |
| UCHL1  | 0.0665  | 2.01E-01 | 3.18E-01 |
| UCHL3  | -0.1055 | 4.23E-02 | 9.41E-02 |
| UCHL5  | 0.2538  | 7.26E-07 | 8.52E-06 |

|           |         |          |          |
|-----------|---------|----------|----------|
| UCK1      | 0.0286  | 5.83E-01 | 6.99E-01 |
| UCK2      | 0.3920  | 4.50E-15 | 3.14E-13 |
| UCKL1AS   | 0.2740  | 8.22E-08 | 1.22E-06 |
| UCKL1     | 0.3289  | 8.32E-11 | 2.48E-09 |
| UCMA      | -0.0362 | 4.87E-01 | 6.14E-01 |
| UCN2      | 0.1143  | 2.77E-02 | 6.70E-02 |
| UCN3      | 0.0939  | 7.09E-02 | 1.42E-01 |
| UCN       | -0.0082 | 8.75E-01 | 9.19E-01 |
| UCP1      | 0.0748  | 1.51E-01 | 2.55E-01 |
| UCP2      | -0.0282 | 5.88E-01 | 7.03E-01 |
| UCP3      | 0.2977  | 4.98E-09 | 9.93E-08 |
| UEVLD     | -0.0056 | 9.14E-01 | 9.46E-01 |
| UFC1      | 0.3770  | 5.63E-14 | 3.12E-12 |
| UFD1L     | 0.1346  | 9.43E-03 | 2.79E-02 |
| UFM1      | -0.0670 | 1.98E-01 | 3.14E-01 |
| UFSP1     | -0.1327 | 1.05E-02 | 3.04E-02 |
| UFSP2     | -0.2735 | 8.71E-08 | 1.28E-06 |
| UGCG      | 0.0125  | 8.11E-01 | 8.76E-01 |
| UGDH      | 0.0874  | 9.28E-02 | 1.75E-01 |
| UGGT1     | 0.0439  | 3.99E-01 | 5.32E-01 |
| UGGT2     | 0.0859  | 9.87E-02 | 1.84E-01 |
| UGP2      | -0.2783 | 5.01E-08 | 7.81E-07 |
| UGT1A10   | 0.1582  | 2.24E-03 | 8.46E-03 |
| UGT1A1    | -0.1971 | 1.33E-04 | 7.79E-04 |
| UGT1A3    | -0.2139 | 3.26E-05 | 2.35E-04 |
| UGT1A4    | -0.2163 | 2.65E-05 | 1.97E-04 |
| UGT1A5    | -0.1662 | 1.31E-03 | 5.40E-03 |
| UGT1A6    | -0.1059 | 4.15E-02 | 9.27E-02 |
| UGT1A7    | 0.1336  | 9.99E-03 | 2.92E-02 |
| UGT1A8    | 0.0330  | 5.27E-01 | 6.49E-01 |
| UGT1A9    | -0.1314 | 1.13E-02 | 3.22E-02 |
| UGT2A1    | 0.0667  | 2.00E-01 | 3.17E-01 |
| UGT2A3    | -0.1199 | 2.09E-02 | 5.31E-02 |
| UGT2B10   | -0.2937 | 8.16E-09 | 1.54E-07 |
| UGT2B11   | -0.0632 | 2.24E-01 | 3.46E-01 |
| UGT2B15   | -0.1953 | 1.53E-04 | 8.80E-04 |
| UGT2B28   | -0.2054 | 6.76E-05 | 4.37E-04 |
| UGT2B4    | -0.0564 | 2.79E-01 | 4.07E-01 |
| UGT2B7    | -0.2261 | 1.09E-05 | 9.07E-05 |
| UGT3A1    | -0.0107 | 8.37E-01 | 8.93E-01 |
| UGT3A2    | 0.0277  | 5.95E-01 | 7.09E-01 |
| UGT8      | 0.0936  | 7.19E-02 | 1.43E-01 |
| UHK1      | -0.0075 | 8.85E-01 | 9.26E-01 |
| UHRF1BP1L | -0.0726 | 1.63E-01 | 2.70E-01 |

|          |         |          |          |
|----------|---------|----------|----------|
| UHRF1BP1 | 0.1528  | 3.18E-03 | 1.13E-02 |
| UHRF1    | 0.4246  | 1.13E-17 | 1.49E-15 |
| UHRF2    | 0.2508  | 9.96E-07 | 1.13E-05 |
| UIMC1    | 0.1900  | 2.32E-04 | 1.25E-03 |
| ULBP1    | 0.1704  | 9.84E-04 | 4.24E-03 |
| ULBP2    | 0.0838  | 1.07E-01 | 1.96E-01 |
| ULBP3    | -0.0127 | 8.08E-01 | 8.73E-01 |
| ULK1     | 0.1470  | 4.56E-03 | 1.53E-02 |
| ULK2     | 0.0546  | 2.94E-01 | 4.23E-01 |
| ULK3     | 0.0593  | 2.54E-01 | 3.80E-01 |
| ULK4     | -0.0185 | 7.23E-01 | 8.12E-01 |
| UMODL1   | 0.1719  | 8.88E-04 | 3.88E-03 |
| UMOD     | 0.0915  | 7.85E-02 | 1.54E-01 |
| UMPS     | 0.1493  | 3.94E-03 | 1.36E-02 |
| UNC119B  | 0.1820  | 4.25E-04 | 2.08E-03 |
| UNC119   | 0.1596  | 2.04E-03 | 7.85E-03 |
| UNC13A   | 0.0854  | 1.01E-01 | 1.86E-01 |
| UNC13B   | 0.0167  | 7.48E-01 | 8.30E-01 |
| UNC13C   | 0.1002  | 5.39E-02 | 1.14E-01 |
| UNC13D   | 0.0430  | 4.09E-01 | 5.41E-01 |
| UNC45A   | 0.0132  | 7.99E-01 | 8.67E-01 |
| UNC45B   | -0.0948 | 6.81E-02 | 1.37E-01 |
| UNC50    | 0.0830  | 1.10E-01 | 2.01E-01 |
| UNC5A    | -0.0049 | 9.25E-01 | 9.52E-01 |
| UNC5B    | 0.0783  | 1.32E-01 | 2.30E-01 |
| UNC5CL   | 0.0332  | 5.24E-01 | 6.48E-01 |
| UNC5C    | -0.1230 | 1.78E-02 | 4.67E-02 |
| UNC5D    | -0.0115 | 8.25E-01 | 8.85E-01 |
| UNC80    | 0.0289  | 5.79E-01 | 6.95E-01 |
| UNC93A   | 0.0692  | 1.84E-01 | 2.96E-01 |
| UNC93B1  | 0.0571  | 2.73E-01 | 4.01E-01 |
| UNG      | 0.1997  | 1.08E-04 | 6.48E-04 |
| UNKL     | 0.2755  | 6.95E-08 | 1.05E-06 |
| UNK      | 0.3878  | 9.15E-15 | 5.98E-13 |
| UOX      | 0.0737  | 1.57E-01 | 2.62E-01 |
| UPB1     | -0.1376 | 7.97E-03 | 2.43E-02 |
| UPF0639  | 0.0254  | 6.25E-01 | 7.34E-01 |
| UPF1     | -0.0289 | 5.79E-01 | 6.96E-01 |
| UPF2     | 0.0862  | 9.74E-02 | 1.82E-01 |
| UPF3A    | 0.2826  | 3.07E-08 | 5.05E-07 |
| UPF3B    | 0.3871  | 1.04E-14 | 6.75E-13 |
| UPK1A    | 0.1947  | 1.61E-04 | 9.13E-04 |
| UPK1B    | 0.0264  | 6.12E-01 | 7.23E-01 |
| UPK2     | 0.0172  | 7.42E-01 | 8.26E-01 |

|         |         |          |          |
|---------|---------|----------|----------|
| UPK3A   | 0.1429  | 5.82E-03 | 1.87E-02 |
| UPK3BL  | 0.1185  | 2.24E-02 | 5.63E-02 |
| UPK3B   | -0.0608 | 2.43E-01 | 3.68E-01 |
| UPP1    | 0.0836  | 1.08E-01 | 1.97E-01 |
| UPP2    | -0.2721 | 1.02E-07 | 1.48E-06 |
| UPRT    | -0.0309 | 5.53E-01 | 6.72E-01 |
| UQCC    | -0.1139 | 2.82E-02 | 6.80E-02 |
| UQCR10  | -0.0808 | 1.20E-01 | 2.15E-01 |
| UQCR11  | -0.1567 | 2.48E-03 | 9.19E-03 |
| UQCRB   | -0.0611 | 2.41E-01 | 3.65E-01 |
| UQCRC1  | -0.2585 | 4.46E-07 | 5.54E-06 |
| UQCRC2  | -0.2773 | 5.62E-08 | 8.66E-07 |
| UQCRFS1 | -0.1463 | 4.74E-03 | 1.58E-02 |
| UQCRHL  | 0.2025  | 8.54E-05 | 5.33E-04 |
| UQCRH   | 0.1567  | 2.47E-03 | 9.17E-03 |
| UQCRQ   | -0.1725 | 8.49E-04 | 3.73E-03 |
| URB1    | 0.0381  | 4.64E-01 | 5.94E-01 |
| URB2    | 0.2545  | 6.75E-07 | 8.00E-06 |
| URGCP   | -0.0809 | 1.20E-01 | 2.14E-01 |
| URM1    | 0.1636  | 1.56E-03 | 6.26E-03 |
| UROC1   | -0.1419 | 6.17E-03 | 1.96E-02 |
| UROD    | -0.1080 | 3.76E-02 | 8.58E-02 |
| UROS    | -0.1514 | 3.46E-03 | 1.22E-02 |
| USE1    | -0.0726 | 1.63E-01 | 2.70E-01 |
| USF1    | 0.4251  | 1.04E-17 | 1.40E-15 |
| USF2    | -0.0278 | 5.94E-01 | 7.08E-01 |
| USH1C   | 0.1212  | 1.95E-02 | 5.03E-02 |
| USH1G   | 0.2180  | 2.28E-05 | 1.73E-04 |
| USH2A   | -0.0553 | 2.88E-01 | 4.17E-01 |
| USHBP1  | -0.1729 | 8.26E-04 | 3.65E-03 |
| USMG5   | -0.0790 | 1.29E-01 | 2.25E-01 |
| USO1    | -0.1180 | 2.30E-02 | 5.76E-02 |
| USP10   | -0.1162 | 2.52E-02 | 6.19E-02 |
| USP11   | 0.0817  | 1.16E-01 | 2.09E-01 |
| USP12   | -0.0805 | 1.22E-01 | 2.17E-01 |
| USP13   | 0.1149  | 2.69E-02 | 6.55E-02 |
| USP14   | 0.1473  | 4.45E-03 | 1.50E-02 |
| USP15   | -0.0415 | 4.26E-01 | 5.58E-01 |
| USP16   | 0.0769  | 1.39E-01 | 2.39E-01 |
| USP17L2 | 0.0157  | 7.63E-01 | 8.40E-01 |
| USP17   | 0.0454  | 3.83E-01 | 5.17E-01 |
| USP18   | -0.0607 | 2.43E-01 | 3.68E-01 |
| USP19   | 0.0336  | 5.19E-01 | 6.43E-01 |
| USP1    | 0.3582  | 1.13E-12 | 5.00E-11 |



|        |         |          |          |
|--------|---------|----------|----------|
| USP20  | 0.1747  | 7.28E-04 | 3.28E-03 |
| USP21  | 0.5454  | 3.84E-30 | 3.64E-27 |
| USP22  | 0.0942  | 6.99E-02 | 1.40E-01 |
| USP24  | 0.1238  | 1.70E-02 | 4.51E-02 |
| USP25  | -0.0892 | 8.64E-02 | 1.65E-01 |
| USP26  | 0.0877  | 9.16E-02 | 1.73E-01 |
| USP27X | 0.0633  | 2.24E-01 | 3.45E-01 |
| USP28  | 0.1527  | 3.19E-03 | 1.14E-02 |
| USP29  | -0.0259 | 6.19E-01 | 7.28E-01 |
| USP2   | -0.1335 | 1.00E-02 | 2.93E-02 |
| USP30  | -0.0954 | 6.65E-02 | 1.35E-01 |
| USP31  | 0.1317  | 1.11E-02 | 3.18E-02 |
| USP32  | 0.0528  | 3.10E-01 | 4.40E-01 |
| USP33  | 0.0924  | 7.54E-02 | 1.49E-01 |
| USP34  | 0.0794  | 1.27E-01 | 2.23E-01 |
| USP35  | -0.1812 | 4.53E-04 | 2.19E-03 |
| USP36  | 0.3308  | 6.35E-11 | 1.95E-09 |
| USP37  | 0.3478  | 5.50E-12 | 2.11E-10 |
| USP38  | -0.2493 | 1.16E-06 | 1.29E-05 |
| USP39  | 0.2109  | 4.25E-05 | 2.95E-04 |
| USP3   | 0.0650  | 2.11E-01 | 3.30E-01 |
| USP40  | 0.0100  | 8.48E-01 | 9.01E-01 |
| USP42  | 0.1407  | 6.64E-03 | 2.09E-02 |
| USP43  | 0.1217  | 1.91E-02 | 4.94E-02 |
| USP44  | 0.0851  | 1.02E-01 | 1.88E-01 |
| USP45  | 0.1379  | 7.83E-03 | 2.39E-02 |
| USP46  | 0.1207  | 2.00E-02 | 5.14E-02 |
| USP47  | -0.2027 | 8.44E-05 | 5.29E-04 |
| USP48  | 0.0989  | 5.70E-02 | 1.19E-01 |
| USP49  | 0.0597  | 2.51E-01 | 3.76E-01 |
| USP4   | -0.0212 | 6.84E-01 | 7.80E-01 |
| USP50  | 0.0233  | 6.54E-01 | 7.57E-01 |
| USP51  | 0.0500  | 3.37E-01 | 4.68E-01 |
| USP53  | -0.1593 | 2.09E-03 | 8.01E-03 |
| USP54  | 0.0369  | 4.79E-01 | 6.07E-01 |
| USP5   | 0.0464  | 3.73E-01 | 5.06E-01 |
| USP6NL | 0.0306  | 5.57E-01 | 6.76E-01 |
| USP6   | 0.1617  | 1.78E-03 | 6.98E-03 |
| USP7   | -0.0104 | 8.41E-01 | 8.96E-01 |
| USP8   | -0.1061 | 4.12E-02 | 9.23E-02 |
| USP9X  | -0.0662 | 2.04E-01 | 3.21E-01 |
| USP9Y  | -0.0067 | 8.98E-01 | 9.36E-01 |
| USPL1  | 0.1601  | 1.98E-03 | 7.62E-03 |
| UST    | -0.1021 | 4.93E-02 | 1.06E-01 |

|        |         |          |          |
|--------|---------|----------|----------|
| UTF1   | 0.0621  | 2.33E-01 | 3.56E-01 |
| UTP11L | 0.1817  | 4.35E-04 | 2.12E-03 |
| UTP14A | 0.3268  | 1.11E-10 | 3.22E-09 |
| UTP14C | -0.0858 | 9.90E-02 | 1.84E-01 |
| UTP15  | -0.0032 | 9.51E-01 | 9.69E-01 |
| UTP18  | 0.3443  | 9.14E-12 | 3.32E-10 |
| UTP20  | 0.1306  | 1.18E-02 | 3.35E-02 |
| UTP23  | 0.1424  | 6.02E-03 | 1.92E-02 |
| UTP3   | -0.0334 | 5.21E-01 | 6.45E-01 |
| UTP6   | 0.4438  | 2.47E-19 | 5.18E-17 |
| UTRN   | 0.1003  | 5.37E-02 | 1.14E-01 |
| UTS2D  | -0.0374 | 4.73E-01 | 6.02E-01 |
| UTS2R  | 0.1164  | 2.50E-02 | 6.14E-02 |
| UTS2   | 0.0957  | 6.55E-02 | 1.33E-01 |
| UTY    | -0.0355 | 4.95E-01 | 6.22E-01 |
| UVRAG  | -0.0115 | 8.25E-01 | 8.86E-01 |
| UXS1   | 0.1661  | 1.32E-03 | 5.44E-03 |
| UXT    | 0.0287  | 5.82E-01 | 6.98E-01 |
| VAC14  | -0.1579 | 2.29E-03 | 8.61E-03 |
| VAMP1  | 0.1045  | 4.43E-02 | 9.77E-02 |
| VAMP2  | -0.0396 | 4.47E-01 | 5.78E-01 |
| VAMP3  | -0.1055 | 4.23E-02 | 9.42E-02 |
| VAMP4  | 0.2995  | 3.99E-09 | 8.24E-08 |
| VAMP5  | -0.1793 | 5.21E-04 | 2.46E-03 |
| VAMP7  | -0.0711 | 1.72E-01 | 2.82E-01 |
| VAMP8  | -0.0289 | 5.80E-01 | 6.96E-01 |
| VANGL1 | 0.1452  | 5.09E-03 | 1.67E-02 |
| VANGL2 | 0.1027  | 4.81E-02 | 1.04E-01 |
| VAPA   | 0.0220  | 6.73E-01 | 7.72E-01 |
| VAPB   | -0.0906 | 8.13E-02 | 1.58E-01 |
| VARS2  | -0.0330 | 5.26E-01 | 6.49E-01 |
| VARS   | 0.0129  | 8.04E-01 | 8.70E-01 |
| VASH1  | 0.0440  | 3.98E-01 | 5.31E-01 |
| VASH2  | 0.1332  | 1.02E-02 | 2.97E-02 |
| VASN   | -0.0565 | 2.78E-01 | 4.07E-01 |
| VASP   | 0.1503  | 3.71E-03 | 1.29E-02 |
| VAT1L  | 0.0804  | 1.22E-01 | 2.17E-01 |
| VAT1   | 0.0861  | 9.79E-02 | 1.83E-01 |
| VAV1   | -0.0619 | 2.34E-01 | 3.57E-01 |
| VAV2   | 0.1041  | 4.51E-02 | 9.91E-02 |
| VAV3   | -0.0492 | 3.44E-01 | 4.76E-01 |
| VAX1   | 0.1747  | 7.26E-04 | 3.27E-03 |
| VAX2   | 0.1214  | 1.93E-02 | 4.99E-02 |
| VBP1   | 0.2852  | 2.25E-08 | 3.85E-07 |

|          |         |          |          |
|----------|---------|----------|----------|
| VCAM1    | -0.0357 | 4.93E-01 | 6.20E-01 |
| VCAN     | -0.0243 | 6.41E-01 | 7.47E-01 |
| VCL      | 0.0491  | 3.45E-01 | 4.77E-01 |
| VCIPI1   | -0.0994 | 5.58E-02 | 1.17E-01 |
| VCP      | -0.0322 | 5.36E-01 | 6.58E-01 |
| VCX2     | 0.1072  | 3.91E-02 | 8.85E-02 |
| VCX3A    | 0.0568  | 2.75E-01 | 4.04E-01 |
| VCX3B    | 0.1015  | 5.07E-02 | 1.09E-01 |
| VCX      | 0.0671  | 1.97E-01 | 3.14E-01 |
| VCY      | 0.0317  | 5.42E-01 | 6.63E-01 |
| VDAC1    | 0.0330  | 5.26E-01 | 6.49E-01 |
| VDAC2    | 0.0424  | 4.15E-01 | 5.48E-01 |
| VDAC3    | 0.0586  | 2.60E-01 | 3.87E-01 |
| VDR      | 0.1163  | 2.50E-02 | 6.16E-02 |
| VEGFA    | 0.1783  | 5.60E-04 | 2.62E-03 |
| VEGFB    | 0.0805  | 1.22E-01 | 2.17E-01 |
| VEGFC    | -0.1546 | 2.82E-03 | 1.03E-02 |
| VENTXP1  | 0.0850  | 1.02E-01 | 1.89E-01 |
| VENTXP7  | 0.1095  | 3.50E-02 | 8.10E-02 |
| VENTX    | -0.0091 | 8.61E-01 | 9.10E-01 |
| VEPH1    | 0.0619  | 2.34E-01 | 3.58E-01 |
| VEZF1    | 0.3259  | 1.25E-10 | 3.59E-09 |
| VEZT     | 0.1249  | 1.61E-02 | 4.31E-02 |
| VGf      | 0.0378  | 4.68E-01 | 5.98E-01 |
| VGLL1    | 0.0572  | 2.72E-01 | 4.00E-01 |
| VGLL2    | 0.1261  | 1.51E-02 | 4.09E-02 |
| VGLL3    | -0.1695 | 1.05E-03 | 4.48E-03 |
| VGLL4    | 0.0351  | 5.00E-01 | 6.26E-01 |
| VHLL     | 0.1303  | 1.20E-02 | 3.39E-02 |
| VHL      | 0.0584  | 2.62E-01 | 3.88E-01 |
| VIL1     | 0.1585  | 2.20E-03 | 8.33E-03 |
| VILL     | 0.0253  | 6.27E-01 | 7.35E-01 |
| VIM      | -0.0968 | 6.26E-02 | 1.28E-01 |
| VIPAR    | -0.0030 | 9.55E-01 | 9.72E-01 |
| VIPR1    | -0.2888 | 1.47E-08 | 2.64E-07 |
| VIPR2    | 0.0209  | 6.88E-01 | 7.84E-01 |
| VIP      | 0.0545  | 2.95E-01 | 4.24E-01 |
| VIT      | 0.0563  | 2.79E-01 | 4.08E-01 |
| VKORC1L1 | -0.0549 | 2.91E-01 | 4.20E-01 |
| VKORC1   | -0.2008 | 9.87E-05 | 6.03E-04 |
| VLDLR    | -0.0290 | 5.78E-01 | 6.95E-01 |
| VMA21    | 0.3256  | 1.31E-10 | 3.74E-09 |
| VMAC     | 0.0937  | 7.14E-02 | 1.42E-01 |
| VMO1     | -0.1024 | 4.88E-02 | 1.06E-01 |

|        |         |          |          |
|--------|---------|----------|----------|
| VN1R1  | 0.2284  | 8.90E-06 | 7.58E-05 |
| VN1R2  | -0.0470 | 3.66E-01 | 4.99E-01 |
| VN1R5  | 0.1905  | 2.23E-04 | 1.21E-03 |
| VNN1   | -0.0576 | 2.69E-01 | 3.96E-01 |
| VNN2   | 0.0939  | 7.09E-02 | 1.42E-01 |
| VNN3   | -0.0363 | 4.86E-01 | 6.14E-01 |
| VOPP1  | 0.0351  | 5.00E-01 | 6.26E-01 |
| VPRBP  | 0.0573  | 2.71E-01 | 3.99E-01 |
| VPREB1 | 0.0413  | 4.27E-01 | 5.60E-01 |
| VPREB3 | -0.0282 | 5.88E-01 | 7.03E-01 |
| VPS11  | 0.1397  | 7.05E-03 | 2.19E-02 |
| VPS13A | 0.0602  | 2.48E-01 | 3.72E-01 |
| VPS13B | -0.0251 | 6.31E-01 | 7.38E-01 |
| VPS13C | -0.1382 | 7.66E-03 | 2.35E-02 |
| VPS13D | -0.2105 | 4.39E-05 | 3.03E-04 |
| VPS16  | 0.0974  | 6.09E-02 | 1.26E-01 |
| VPS18  | -0.1602 | 1.97E-03 | 7.61E-03 |
| VPS24  | 0.1271  | 1.43E-02 | 3.92E-02 |
| VPS25  | 0.1499  | 3.80E-03 | 1.32E-02 |
| VPS26A | 0.1855  | 3.28E-04 | 1.68E-03 |
| VPS26B | -0.1043 | 4.46E-02 | 9.82E-02 |
| VPS28  | -0.0221 | 6.72E-01 | 7.71E-01 |
| VPS29  | 0.0967  | 6.28E-02 | 1.29E-01 |
| VPS33A | 0.0723  | 1.65E-01 | 2.72E-01 |
| VPS33B | 0.1350  | 9.25E-03 | 2.75E-02 |
| VPS35  | 0.0175  | 7.36E-01 | 8.22E-01 |
| VPS36  | -0.2106 | 4.34E-05 | 3.00E-04 |
| VPS37A | 0.0159  | 7.60E-01 | 8.38E-01 |
| VPS37B | 0.1340  | 9.79E-03 | 2.87E-02 |
| VPS37C | 0.2475  | 1.39E-06 | 1.51E-05 |
| VPS37D | -0.1411 | 6.48E-03 | 2.04E-02 |
| VPS39  | 0.0658  | 2.06E-01 | 3.24E-01 |
| VPS41  | -0.1438 | 5.51E-03 | 1.79E-02 |
| VPS45  | 0.6473  | 1.96E-45 | 9.76E-42 |
| VPS4A  | -0.1191 | 2.18E-02 | 5.51E-02 |
| VPS4B  | -0.1490 | 4.03E-03 | 1.38E-02 |
| VPS52  | 0.0814  | 1.17E-01 | 2.11E-01 |
| VPS53  | -0.0847 | 1.03E-01 | 1.90E-01 |
| VPS54  | 0.1357  | 8.84E-03 | 2.65E-02 |
| VPS72  | 0.6580  | 2.20E-47 | 1.46E-43 |
| VPS8   | 0.1355  | 8.99E-03 | 2.68E-02 |
| VRK1   | 0.2816  | 3.43E-08 | 5.56E-07 |
| VRK2   | 0.1635  | 1.58E-03 | 6.33E-03 |
| VRK3   | -0.1058 | 4.17E-02 | 9.32E-02 |

|         |         |          |          |
|---------|---------|----------|----------|
| VSIG10L | -0.0449 | 3.89E-01 | 5.22E-01 |
| VSIG10  | 0.1455  | 4.98E-03 | 1.64E-02 |
| VSIG1   | 0.0232  | 6.57E-01 | 7.58E-01 |
| VSIG2   | -0.1799 | 4.99E-04 | 2.38E-03 |
| VSIG4   | -0.1151 | 2.66E-02 | 6.49E-02 |
| VSIG8   | 0.1427  | 5.89E-03 | 1.89E-02 |
| VSNL1   | -0.0201 | 6.99E-01 | 7.93E-01 |
| VSTM1   | 0.0321  | 5.37E-01 | 6.59E-01 |
| VSTM2A  | -0.0387 | 4.57E-01 | 5.88E-01 |
| VSTM2B  | 0.0157  | 7.63E-01 | 8.40E-01 |
| VSTM2L  | -0.1533 | 3.07E-03 | 1.10E-02 |
| VSX1    | 0.0665  | 2.02E-01 | 3.18E-01 |
| VSX2    | 0.1854  | 3.30E-04 | 1.69E-03 |
| VTA1    | 0.1932  | 1.81E-04 | 1.01E-03 |
| VTCN1   | 0.0499  | 3.38E-01 | 4.69E-01 |
| VTI1A   | -0.0562 | 2.80E-01 | 4.09E-01 |
| VTI1B   | -0.2419 | 2.44E-06 | 2.48E-05 |
| VTN     | -0.0899 | 8.37E-02 | 1.61E-01 |
| VWA1    | -0.0741 | 1.54E-01 | 2.59E-01 |
| VWA2    | -0.0049 | 9.25E-01 | 9.53E-01 |
| VWA3A   | 0.0749  | 1.50E-01 | 2.54E-01 |
| VWA3B   | 0.0025  | 9.61E-01 | 9.76E-01 |
| VWA5A   | -0.0217 | 6.77E-01 | 7.76E-01 |
| VWA5B1  | 0.0208  | 6.90E-01 | 7.85E-01 |
| VWA5B2  | 0.1695  | 1.05E-03 | 4.46E-03 |
| VWC2L   | 0.0746  | 1.51E-01 | 2.55E-01 |
| VWC2    | -0.0407 | 4.34E-01 | 5.66E-01 |
| VWCE    | 0.0509  | 3.28E-01 | 4.59E-01 |
| VWDE    | 0.1111  | 3.24E-02 | 7.60E-02 |
| VWF     | -0.2790 | 4.61E-08 | 7.28E-07 |
| WAC     | 0.2466  | 1.52E-06 | 1.64E-05 |
| WAPAL   | -0.0339 | 5.16E-01 | 6.40E-01 |
| WARS2   | 0.0099  | 8.49E-01 | 9.01E-01 |
| WARS    | -0.0389 | 4.55E-01 | 5.86E-01 |
| WASF1   | 0.3443  | 9.24E-12 | 3.33E-10 |
| WASF2   | 0.1850  | 3.42E-04 | 1.74E-03 |
| WASF3   | -0.1094 | 3.52E-02 | 8.14E-02 |
| WASH2P  | 0.2346  | 4.95E-06 | 4.61E-05 |
| WASH3P  | 0.2866  | 1.90E-08 | 3.31E-07 |
| WASH5P  | 0.1688  | 1.10E-03 | 4.65E-03 |
| WASH7P  | 0.3488  | 4.72E-12 | 1.83E-10 |
| WASL    | -0.1970 | 1.34E-04 | 7.86E-04 |
| WAS     | -0.0247 | 6.35E-01 | 7.42E-01 |
| WBP11P1 | 0.0656  | 2.08E-01 | 3.26E-01 |

|         |         |          |          |
|---------|---------|----------|----------|
| WBP11   | 0.1441  | 5.41E-03 | 1.76E-02 |
| WBP1    | -0.0471 | 3.66E-01 | 4.99E-01 |
| WBP2NL  | 0.1459  | 4.86E-03 | 1.61E-02 |
| WBP2    | -0.0184 | 7.25E-01 | 8.13E-01 |
| WBP4    | -0.0092 | 8.60E-01 | 9.10E-01 |
| WBP5    | 0.2061  | 6.34E-05 | 4.14E-04 |
| WBSCR16 | -0.2000 | 1.05E-04 | 6.34E-04 |
| WBSCR17 | -0.1349 | 9.30E-03 | 2.76E-02 |
| WBSCR22 | -0.0028 | 9.58E-01 | 9.74E-01 |
| WBSCR26 | -0.0239 | 6.46E-01 | 7.50E-01 |
| WBSCR27 | 0.1002  | 5.38E-02 | 1.14E-01 |
| WBSCR28 | 0.1925  | 1.91E-04 | 1.06E-03 |
| WDFY1   | -0.0084 | 8.71E-01 | 9.17E-01 |
| WDFY2   | 0.0604  | 2.46E-01 | 3.71E-01 |
| WDFY3   | -0.0521 | 3.17E-01 | 4.47E-01 |
| WDFY4   | -0.0445 | 3.93E-01 | 5.26E-01 |
| WDHD1   | 0.3853  | 1.40E-14 | 8.79E-13 |
| WDR11   | -0.0965 | 6.34E-02 | 1.30E-01 |
| WDR12   | 0.1812  | 4.54E-04 | 2.19E-03 |
| WDR13   | -0.0356 | 4.95E-01 | 6.21E-01 |
| WDR16   | 0.1959  | 1.46E-04 | 8.44E-04 |
| WDR17   | -0.0448 | 3.89E-01 | 5.22E-01 |
| WDR18   | -0.0313 | 5.47E-01 | 6.68E-01 |
| WDR19   | 0.1329  | 1.04E-02 | 3.02E-02 |
| WDR1    | -0.0315 | 5.46E-01 | 6.66E-01 |
| WDR20   | -0.0011 | 9.83E-01 | 9.89E-01 |
| WDR24   | -0.0710 | 1.72E-01 | 2.82E-01 |
| WDR25   | -0.0903 | 8.25E-02 | 1.60E-01 |
| WDR26   | 0.1710  | 9.43E-04 | 4.09E-03 |
| WDR27   | 0.3450  | 8.22E-12 | 3.01E-10 |
| WDR31   | 0.0414  | 4.26E-01 | 5.59E-01 |
| WDR33   | 0.3455  | 7.73E-12 | 2.84E-10 |
| WDR34   | 0.2803  | 4.00E-08 | 6.39E-07 |
| WDR35   | 0.0226  | 6.64E-01 | 7.64E-01 |
| WDR36   | -0.1243 | 1.66E-02 | 4.41E-02 |
| WDR37   | 0.0617  | 2.35E-01 | 3.59E-01 |
| WDR38   | 0.0921  | 7.64E-02 | 1.50E-01 |
| WDR3    | -0.0003 | 9.95E-01 | 9.97E-01 |
| WDR41   | 0.0380  | 4.66E-01 | 5.96E-01 |
| WDR43   | 0.0346  | 5.06E-01 | 6.31E-01 |
| WDR44   | -0.0592 | 2.55E-01 | 3.81E-01 |
| WDR45L  | 0.1501  | 3.75E-03 | 1.31E-02 |
| WDR45   | -0.1073 | 3.89E-02 | 8.81E-02 |
| WDR46   | 0.1470  | 4.56E-03 | 1.53E-02 |

|        |         |          |          |
|--------|---------|----------|----------|
| WDR47  | 0.0989  | 5.69E-02 | 1.19E-01 |
| WDR48  | 0.0092  | 8.59E-01 | 9.09E-01 |
| WDR49  | 0.1408  | 6.62E-03 | 2.08E-02 |
| WDR4   | 0.2091  | 4.95E-05 | 3.35E-04 |
| WDR52  | 0.2825  | 3.09E-08 | 5.08E-07 |
| WDR53  | 0.3470  | 6.18E-12 | 2.33E-10 |
| WDR54  | 0.1064  | 4.05E-02 | 9.10E-02 |
| WDR55  | -0.0695 | 1.81E-01 | 2.93E-01 |
| WDR59  | -0.1464 | 4.72E-03 | 1.57E-02 |
| WDR5B  | 0.2090  | 4.96E-05 | 3.36E-04 |
| WDR5   | 0.2732  | 8.98E-08 | 1.32E-06 |
| WDR60  | -0.0013 | 9.81E-01 | 9.88E-01 |
| WDR61  | -0.0851 | 1.02E-01 | 1.88E-01 |
| WDR62  | 0.4292  | 4.61E-18 | 6.66E-16 |
| WDR63  | -0.0531 | 3.07E-01 | 4.37E-01 |
| WDR64  | -0.0034 | 9.48E-01 | 9.68E-01 |
| WDR65  | -0.1471 | 4.53E-03 | 1.52E-02 |
| WDR66  | 0.0130  | 8.03E-01 | 8.70E-01 |
| WDR67  | 0.2598  | 3.90E-07 | 4.91E-06 |
| WDR69  | 0.0949  | 6.78E-02 | 1.37E-01 |
| WDR6   | 0.1290  | 1.29E-02 | 3.60E-02 |
| WDR70  | 0.2566  | 5.42E-07 | 6.57E-06 |
| WDR72  | 0.0027  | 9.59E-01 | 9.74E-01 |
| WDR73  | 0.1422  | 6.09E-03 | 1.94E-02 |
| WDR74  | 0.0707  | 1.74E-01 | 2.84E-01 |
| WDR75  | 0.3257  | 1.29E-10 | 3.70E-09 |
| WDR76  | 0.4124  | 1.14E-16 | 1.15E-14 |
| WDR77  | 0.1335  | 1.01E-02 | 2.94E-02 |
| WDR78  | -0.0739 | 1.55E-01 | 2.60E-01 |
| WDR7   | -0.2148 | 3.01E-05 | 2.19E-04 |
| WDR81  | -0.1405 | 6.71E-03 | 2.10E-02 |
| WDR82  | 0.0234  | 6.53E-01 | 7.56E-01 |
| WDR83  | 0.0166  | 7.51E-01 | 8.32E-01 |
| WDR85  | 0.3712  | 1.45E-13 | 7.57E-12 |
| WDR86  | -0.1217 | 1.91E-02 | 4.94E-02 |
| WDR87  | 0.1540  | 2.93E-03 | 1.06E-02 |
| WDR88  | 0.2413  | 2.58E-06 | 2.59E-05 |
| WDR89  | 0.0455  | 3.82E-01 | 5.15E-01 |
| WDR8   | 0.1232  | 1.76E-02 | 4.63E-02 |
| WDR90  | 0.3207  | 2.56E-10 | 6.99E-09 |
| WDR91  | 0.1482  | 4.22E-03 | 1.44E-02 |
| WDR92  | 0.0140  | 7.88E-01 | 8.59E-01 |
| WDR93  | 0.1351  | 9.15E-03 | 2.72E-02 |
| WDSUB1 | 0.2676  | 1.68E-07 | 2.32E-06 |

|         |         |          |          |
|---------|---------|----------|----------|
| WDTC1   | -0.1438 | 5.51E-03 | 1.79E-02 |
| WDYHV1  | 0.2058  | 6.53E-05 | 4.24E-04 |
| WEE1    | 0.1446  | 5.25E-03 | 1.72E-02 |
| WEE2    | -0.0329 | 5.27E-01 | 6.50E-01 |
| WFDC10A | 0.0916  | 7.81E-02 | 1.53E-01 |
| WFDC10B | 0.0946  | 6.87E-02 | 1.38E-01 |
| WFDC12  | 0.0504  | 3.33E-01 | 4.64E-01 |
| WFDC13  | 0.1099  | 3.43E-02 | 7.98E-02 |
| WFDC1   | -0.1253 | 1.57E-02 | 4.22E-02 |
| WFDC2   | 0.0471  | 3.65E-01 | 4.98E-01 |
| WFDC3   | 0.1089  | 3.61E-02 | 8.30E-02 |
| WFDC5   | 0.0107  | 8.38E-01 | 8.93E-01 |
| WFDC6   | 0.1405  | 6.72E-03 | 2.10E-02 |
| WFDC8   | 0.0941  | 7.03E-02 | 1.41E-01 |
| WFIKKN1 | 0.0631  | 2.25E-01 | 3.47E-01 |
| WFIKKN2 | -0.0413 | 4.28E-01 | 5.60E-01 |
| WFS1    | 0.0721  | 1.66E-01 | 2.74E-01 |
| WHAMML1 | 0.0123  | 8.14E-01 | 8.78E-01 |
| WHAMML2 | 0.0350  | 5.01E-01 | 6.27E-01 |
| WHAMM   | -0.0305 | 5.58E-01 | 6.77E-01 |
| WHSC1L1 | 0.1652  | 1.40E-03 | 5.71E-03 |
| WHSC1   | 0.3759  | 6.71E-14 | 3.66E-12 |
| WHSC2   | 0.1921  | 1.97E-04 | 1.09E-03 |
| WIBG    | 0.0672  | 1.97E-01 | 3.12E-01 |
| WIF1    | 0.1250  | 1.60E-02 | 4.28E-02 |
| WIPF1   | -0.0585 | 2.61E-01 | 3.87E-01 |
| WIPF2   | 0.1462  | 4.78E-03 | 1.59E-02 |
| WIPF3   | -0.0018 | 9.72E-01 | 9.82E-01 |
| WIPI1   | -0.0286 | 5.83E-01 | 6.99E-01 |
| WIPI2   | -0.0741 | 1.54E-01 | 2.59E-01 |
| WISP1   | -0.1542 | 2.90E-03 | 1.05E-02 |
| WISP2   | -0.1749 | 7.17E-04 | 3.23E-03 |
| WISP3   | 0.1016  | 5.05E-02 | 1.08E-01 |
| WIT1    | 0.1300  | 1.22E-02 | 3.44E-02 |
| WIZ     | -0.0344 | 5.09E-01 | 6.34E-01 |
| WLS     | -0.2036 | 7.81E-05 | 4.94E-04 |
| WNK1    | 0.0439  | 3.99E-01 | 5.32E-01 |
| WNK2    | 0.2065  | 6.13E-05 | 4.02E-04 |
| WNK3    | -0.0186 | 7.22E-01 | 8.11E-01 |
| WNK4    | 0.1112  | 3.22E-02 | 7.57E-02 |
| WNT10A  | 0.0840  | 1.06E-01 | 1.95E-01 |
| WNT10B  | 0.0631  | 2.26E-01 | 3.47E-01 |
| WNT11   | 0.0205  | 6.94E-01 | 7.89E-01 |
| WNT16   | 0.0306  | 5.57E-01 | 6.76E-01 |



|        |         |          |          |
|--------|---------|----------|----------|
| WNT1   | -0.1074 | 3.87E-02 | 8.78E-02 |
| WNT2B  | 0.0101  | 8.46E-01 | 8.99E-01 |
| WNT2   | -0.1178 | 2.33E-02 | 5.81E-02 |
| WNT3A  | 0.0977  | 6.01E-02 | 1.24E-01 |
| WNT3   | 0.1088  | 3.62E-02 | 8.32E-02 |
| WNT4   | 0.0694  | 1.82E-01 | 2.94E-01 |
| WNT5A  | -0.0628 | 2.27E-01 | 3.49E-01 |
| WNT5B  | -0.0648 | 2.13E-01 | 3.33E-01 |
| WNT6   | 0.0222  | 6.69E-01 | 7.69E-01 |
| WNT7A  | -0.0909 | 8.05E-02 | 1.56E-01 |
| WNT7B  | 0.1043  | 4.48E-02 | 9.86E-02 |
| WNT8A  | -0.0376 | 4.70E-01 | 6.00E-01 |
| WNT8B  | -0.0066 | 8.99E-01 | 9.36E-01 |
| WNT9A  | -0.0124 | 8.12E-01 | 8.76E-01 |
| WNT9B  | -0.2017 | 9.13E-05 | 5.64E-04 |
| WRAP53 | 0.1803  | 4.83E-04 | 2.31E-03 |
| WRB    | 0.0547  | 2.93E-01 | 4.23E-01 |
| WRNIP1 | 0.0823  | 1.14E-01 | 2.06E-01 |
| WRN    | 0.0809  | 1.20E-01 | 2.14E-01 |
| WSB1   | 0.1897  | 2.38E-04 | 1.28E-03 |
| WSB2   | 0.1026  | 4.83E-02 | 1.05E-01 |
| WSCD1  | 0.1449  | 5.17E-03 | 1.70E-02 |
| WSCD2  | -0.2478 | 1.35E-06 | 1.47E-05 |
| WT1    | 0.1337  | 9.93E-03 | 2.91E-02 |
| WTAP   | 0.2653  | 2.14E-07 | 2.88E-06 |
| WTIP   | -0.0358 | 4.92E-01 | 6.19E-01 |
| WWC1   | -0.0524 | 3.14E-01 | 4.44E-01 |
| WWC2   | -0.1969 | 1.35E-04 | 7.88E-04 |
| WWC3   | 0.0609  | 2.42E-01 | 3.66E-01 |
| WWOX   | -0.2539 | 7.24E-07 | 8.50E-06 |
| WWP1   | -0.1167 | 2.45E-02 | 6.06E-02 |
| WWP2   | -0.1208 | 1.99E-02 | 5.13E-02 |
| WWTR1  | 0.0565  | 2.77E-01 | 4.06E-01 |
| XAB2   | 0.0859  | 9.86E-02 | 1.84E-01 |
| XAF1   | -0.1454 | 5.02E-03 | 1.65E-02 |
| XAGE1D | 0.0221  | 6.72E-01 | 7.71E-01 |
| XAGE2  | 0.1915  | 2.07E-04 | 1.14E-03 |
| XAGE3  | 0.0110  | 8.33E-01 | 8.90E-01 |
| XAGE5  | 0.0631  | 2.26E-01 | 3.47E-01 |
| XBP1   | -0.0358 | 4.92E-01 | 6.19E-01 |
| XCL1   | 0.0823  | 1.13E-01 | 2.05E-01 |
| XCL2   | 0.0234  | 6.53E-01 | 7.56E-01 |
| XCR1   | -0.1021 | 4.94E-02 | 1.07E-01 |
| XDH    | -0.1808 | 4.67E-04 | 2.24E-03 |

|          |         |          |          |
|----------|---------|----------|----------|
| XG       | -0.1221 | 1.86E-02 | 4.85E-02 |
| XIAP     | 0.0340  | 5.14E-01 | 6.38E-01 |
| XIRP1    | -0.0146 | 7.80E-01 | 8.53E-01 |
| XIRP2    | 0.0766  | 1.41E-01 | 2.42E-01 |
| XIST     | 0.0185  | 7.23E-01 | 8.12E-01 |
| XKR3     | 0.0263  | 6.13E-01 | 7.24E-01 |
| XKR4     | 0.0534  | 3.05E-01 | 4.35E-01 |
| XKR5     | 0.1599  | 2.00E-03 | 7.71E-03 |
| XKR6     | -0.0102 | 8.45E-01 | 8.99E-01 |
| XKR7     | -0.0165 | 7.51E-01 | 8.32E-01 |
| XKR8     | -0.0639 | 2.19E-01 | 3.40E-01 |
| XKR9     | -0.1132 | 2.92E-02 | 7.00E-02 |
| XKRX     | 0.0912  | 7.95E-02 | 1.55E-01 |
| XKRY2    | -0.0050 | 9.23E-01 | 9.52E-01 |
| XK       | -0.0441 | 3.97E-01 | 5.30E-01 |
| XPA      | 0.1433  | 5.68E-03 | 1.83E-02 |
| XPC      | -0.1181 | 2.29E-02 | 5.73E-02 |
| XPNPEP1  | 0.0585  | 2.61E-01 | 3.87E-01 |
| XPNPEP2  | -0.0327 | 5.30E-01 | 6.53E-01 |
| XPNPEP3  | 0.0617  | 2.36E-01 | 3.59E-01 |
| XPO1     | 0.3411  | 1.47E-11 | 5.11E-10 |
| XPO4     | 0.1304  | 1.19E-02 | 3.37E-02 |
| XPO5     | 0.2417  | 2.48E-06 | 2.51E-05 |
| XPO6     | 0.1414  | 6.39E-03 | 2.02E-02 |
| XPO7     | 0.1178  | 2.33E-02 | 5.81E-02 |
| XPOT     | 0.0637  | 2.21E-01 | 3.42E-01 |
| XPR1     | 0.2752  | 7.13E-08 | 1.07E-06 |
| XRCC1    | 0.2555  | 6.09E-07 | 7.26E-06 |
| XRCC2    | 0.3492  | 4.42E-12 | 1.73E-10 |
| XRCC3    | 0.3997  | 1.17E-15 | 9.21E-14 |
| XRCC4    | 0.0633  | 2.24E-01 | 3.45E-01 |
| XRCC5    | 0.2050  | 6.94E-05 | 4.48E-04 |
| XRCC6BP1 | 0.1182  | 2.28E-02 | 5.72E-02 |
| XRCC6    | 0.2169  | 2.50E-05 | 1.88E-04 |
| XRN1     | -0.0363 | 4.86E-01 | 6.14E-01 |
| XRN2     | -0.0096 | 8.54E-01 | 9.06E-01 |
| XRRA1    | 0.2201  | 1.89E-05 | 1.47E-04 |
| XYLB     | -0.1151 | 2.66E-02 | 6.49E-02 |
| XYLT1    | -0.0859 | 9.86E-02 | 1.84E-01 |
| XYLT2    | 0.1392  | 7.25E-03 | 2.24E-02 |
| YAF2     | -0.1186 | 2.24E-02 | 5.63E-02 |
| YAP1     | -0.0389 | 4.55E-01 | 5.86E-01 |
| YARS2    | 0.0087  | 8.67E-01 | 9.15E-01 |
| YARS     | 0.0085  | 8.71E-01 | 9.17E-01 |

|        |         |          |          |
|--------|---------|----------|----------|
| YBX1   | 0.0431  | 4.08E-01 | 5.41E-01 |
| YBX2   | 0.0655  | 2.08E-01 | 3.27E-01 |
| YDJC   | 0.1170  | 2.42E-02 | 6.00E-02 |
| YEATS2 | 0.2850  | 2.30E-08 | 3.90E-07 |
| YEATS4 | 0.1628  | 1.65E-03 | 6.57E-03 |
| YES1   | -0.0562 | 2.80E-01 | 4.09E-01 |
| YIF1A  | -0.1396 | 7.09E-03 | 2.20E-02 |
| YIF1B  | 0.0375  | 4.72E-01 | 6.01E-01 |
| YIPF1  | -0.0811 | 1.19E-01 | 2.13E-01 |
| YIPF2  | -0.1312 | 1.14E-02 | 3.25E-02 |
| YIPF3  | -0.0789 | 1.29E-01 | 2.26E-01 |
| YIPF4  | -0.1455 | 4.98E-03 | 1.64E-02 |
| YIPF5  | 0.0456  | 3.81E-01 | 5.15E-01 |
| YIPF6  | -0.0458 | 3.79E-01 | 5.13E-01 |
| YIPF7  | -0.0434 | 4.05E-01 | 5.38E-01 |
| YJEFN3 | 0.3041  | 2.24E-09 | 4.88E-08 |
| YKT6   | 0.1313  | 1.13E-02 | 3.23E-02 |
| YLPM1  | 0.0035  | 9.47E-01 | 9.67E-01 |
| YME1L1 | 0.0048  | 9.27E-01 | 9.54E-01 |
| YOD1   | 0.3337  | 4.25E-11 | 1.35E-09 |
| YPEL1  | -0.0641 | 2.18E-01 | 3.38E-01 |
| YPEL2  | 0.0104  | 8.42E-01 | 8.97E-01 |
| YPEL3  | 0.0111  | 8.32E-01 | 8.90E-01 |
| YPEL4  | 0.0322  | 5.37E-01 | 6.59E-01 |
| YPEL5  | -0.1098 | 3.45E-02 | 8.01E-02 |
| YRDC   | -0.0345 | 5.07E-01 | 6.32E-01 |
| YSK4   | -0.0083 | 8.73E-01 | 9.18E-01 |
| YTHDC1 | 0.1271  | 1.43E-02 | 3.92E-02 |
| YTHDC2 | -0.0802 | 1.23E-01 | 2.18E-01 |
| YTHDF1 | 0.2054  | 6.73E-05 | 4.36E-04 |
| YTHDF2 | 0.0371  | 4.76E-01 | 6.05E-01 |
| YTHDF3 | -0.1480 | 4.29E-03 | 1.46E-02 |
| YWHAB  | 0.0622  | 2.32E-01 | 3.55E-01 |
| YWHAE  | -0.0725 | 1.63E-01 | 2.71E-01 |
| YWHAG  | -0.1281 | 1.35E-02 | 3.75E-02 |
| YWHAH  | 0.1587  | 2.17E-03 | 8.22E-03 |
| YWHAQ  | 0.1579  | 2.29E-03 | 8.61E-03 |
| YWHAZ  | 0.1640  | 1.53E-03 | 6.15E-03 |
| YY1AP1 | 0.5965  | 4.02E-37 | 8.91E-34 |
| YY1    | -0.0642 | 2.17E-01 | 3.37E-01 |
| YY2    | -0.0359 | 4.91E-01 | 6.18E-01 |
| ZACN   | 0.1430  | 5.80E-03 | 1.86E-02 |
| ZADH2  | -0.1753 | 6.94E-04 | 3.15E-03 |
| ZAK    | -0.0802 | 1.23E-01 | 2.18E-01 |

|        |         |          |          |
|--------|---------|----------|----------|
| ZAN    | 0.1005  | 5.32E-02 | 1.13E-01 |
| ZAP70  | -0.0104 | 8.41E-01 | 8.96E-01 |
| ZAR1L  | 0.1080  | 3.75E-02 | 8.58E-02 |
| ZAR1   | 0.0860  | 9.80E-02 | 1.83E-01 |
| ZBBX   | 0.0772  | 1.38E-01 | 2.37E-01 |
| ZBED1  | -0.1277 | 1.39E-02 | 3.83E-02 |
| ZBED2  | 0.1059  | 4.16E-02 | 9.29E-02 |
| ZBED3  | -0.0862 | 9.72E-02 | 1.82E-01 |
| ZBED4  | 0.2519  | 8.91E-07 | 1.02E-05 |
| ZBED5  | 0.2896  | 1.33E-08 | 2.41E-07 |
| ZBP1   | 0.0217  | 6.77E-01 | 7.75E-01 |
| ZBTB10 | -0.0775 | 1.36E-01 | 2.36E-01 |
| ZBTB11 | 0.1310  | 1.15E-02 | 3.28E-02 |
| ZBTB12 | 0.3088  | 1.23E-09 | 2.85E-08 |
| ZBTB16 | -0.2708 | 1.18E-07 | 1.68E-06 |
| ZBTB17 | 0.1056  | 4.21E-02 | 9.37E-02 |
| ZBTB1  | 0.0031  | 9.52E-01 | 9.70E-01 |
| ZBTB20 | -0.0873 | 9.32E-02 | 1.76E-01 |
| ZBTB22 | 0.0317  | 5.42E-01 | 6.63E-01 |
| ZBTB24 | 0.2812  | 3.61E-08 | 5.82E-07 |
| ZBTB25 | 0.0389  | 4.55E-01 | 5.86E-01 |
| ZBTB26 | 0.1542  | 2.91E-03 | 1.05E-02 |
| ZBTB2  | 0.2178  | 2.32E-05 | 1.76E-04 |
| ZBTB32 | 0.0630  | 2.26E-01 | 3.47E-01 |
| ZBTB33 | -0.0596 | 2.52E-01 | 3.77E-01 |
| ZBTB34 | 0.3443  | 9.23E-12 | 3.33E-10 |
| ZBTB37 | 0.0205  | 6.94E-01 | 7.89E-01 |
| ZBTB38 | -0.1438 | 5.52E-03 | 1.79E-02 |
| ZBTB39 | 0.0908  | 8.09E-02 | 1.57E-01 |
| ZBTB3  | 0.1145  | 2.75E-02 | 6.65E-02 |
| ZBTB40 | 0.2610  | 3.42E-07 | 4.39E-06 |
| ZBTB41 | 0.2981  | 4.76E-09 | 9.56E-08 |
| ZBTB42 | -0.0127 | 8.07E-01 | 8.73E-01 |
| ZBTB43 | 0.0207  | 6.92E-01 | 7.87E-01 |
| ZBTB44 | 0.0481  | 3.55E-01 | 4.87E-01 |
| ZBTB45 | 0.2313  | 6.78E-06 | 6.01E-05 |
| ZBTB46 | -0.0328 | 5.29E-01 | 6.52E-01 |
| ZBTB47 | -0.0973 | 6.12E-02 | 1.26E-01 |
| ZBTB48 | 0.0272  | 6.01E-01 | 7.14E-01 |
| ZBTB49 | 0.1724  | 8.55E-04 | 3.76E-03 |
| ZBTB4  | -0.0044 | 9.33E-01 | 9.58E-01 |
| ZBTB5  | 0.2785  | 4.89E-08 | 7.63E-07 |
| ZBTB6  | 0.2016  | 9.20E-05 | 5.68E-04 |
| ZBTB7A | -0.1278 | 1.38E-02 | 3.81E-02 |

|          |         |          |          |
|----------|---------|----------|----------|
| ZBTB7B   | 0.3054  | 1.89E-09 | 4.23E-08 |
| ZBTB7C   | -0.2862 | 2.00E-08 | 3.46E-07 |
| ZBTB8A   | 0.1006  | 5.29E-02 | 1.12E-01 |
| ZBTB8B   | 0.1386  | 7.49E-03 | 2.30E-02 |
| ZBTB8OS  | 0.0092  | 8.60E-01 | 9.10E-01 |
| ZBTB9    | 0.3159  | 4.85E-10 | 1.23E-08 |
| ZC3H10   | 0.2330  | 5.75E-06 | 5.21E-05 |
| ZC3H11A  | 0.3456  | 7.55E-12 | 2.79E-10 |
| ZC3H12A  | 0.0281  | 5.90E-01 | 7.05E-01 |
| ZC3H12B  | 0.1446  | 5.27E-03 | 1.72E-02 |
| ZC3H12C  | -0.0359 | 4.90E-01 | 6.18E-01 |
| ZC3H12D  | 0.0127  | 8.08E-01 | 8.74E-01 |
| ZC3H13   | -0.1248 | 1.62E-02 | 4.32E-02 |
| ZC3H14   | -0.0056 | 9.14E-01 | 9.46E-01 |
| ZC3H15   | 0.0249  | 6.32E-01 | 7.39E-01 |
| ZC3H18   | 0.0003  | 9.95E-01 | 9.97E-01 |
| ZC3H3    | 0.1520  | 3.34E-03 | 1.18E-02 |
| ZC3H4    | 0.2216  | 1.66E-05 | 1.31E-04 |
| ZC3H6    | -0.0118 | 8.20E-01 | 8.82E-01 |
| ZC3H7A   | 0.0196  | 7.07E-01 | 7.99E-01 |
| ZC3H7B   | -0.0498 | 3.39E-01 | 4.70E-01 |
| ZC3H8    | 0.0662  | 2.03E-01 | 3.21E-01 |
| ZC3HAV1L | 0.0974  | 6.08E-02 | 1.26E-01 |
| ZC3HAV1  | 0.0540  | 2.99E-01 | 4.29E-01 |
| ZC3HC1   | -0.0752 | 1.48E-01 | 2.52E-01 |
| ZC4H2    | 0.1399  | 6.96E-03 | 2.17E-02 |
| ZCCHC10  | 0.1092  | 3.54E-02 | 8.18E-02 |
| ZCCHC11  | 0.1438  | 5.51E-03 | 1.79E-02 |
| ZCCHC12  | 0.0724  | 1.64E-01 | 2.72E-01 |
| ZCCHC13  | 0.0438  | 4.00E-01 | 5.33E-01 |
| ZCCHC14  | -0.1012 | 5.15E-02 | 1.10E-01 |
| ZCCHC16  | -0.1813 | 4.50E-04 | 2.18E-03 |
| ZCCHC17  | 0.2374  | 3.78E-06 | 3.65E-05 |
| ZCCHC18  | -0.0217 | 6.77E-01 | 7.76E-01 |
| ZCCHC24  | -0.2573 | 5.08E-07 | 6.20E-06 |
| ZCCHC2   | 0.0124  | 8.11E-01 | 8.76E-01 |
| ZCCHC3   | 0.2074  | 5.72E-05 | 3.80E-04 |
| ZCCHC4   | 0.0674  | 1.95E-01 | 3.11E-01 |
| ZCCHC5   | 0.0083  | 8.74E-01 | 9.18E-01 |
| ZCCHC6   | -0.1429 | 5.83E-03 | 1.87E-02 |
| ZCCHC7   | 0.2247  | 1.25E-05 | 1.02E-04 |
| ZCCHC8   | 0.1717  | 8.99E-04 | 3.92E-03 |
| ZCCHC9   | 0.1346  | 9.43E-03 | 2.79E-02 |
| ZCRB1    | 0.0905  | 8.16E-02 | 1.58E-01 |

|          |         |          |          |
|----------|---------|----------|----------|
| ZCWPW1   | -0.0561 | 2.81E-01 | 4.09E-01 |
| ZCWPW2   | 0.0606  | 2.44E-01 | 3.69E-01 |
| ZDBF2    | 0.1294  | 1.26E-02 | 3.54E-02 |
| ZDHHC11  | 0.2280  | 9.18E-06 | 7.79E-05 |
| ZDHHC12  | 0.1256  | 1.55E-02 | 4.17E-02 |
| ZDHHC13  | 0.2499  | 1.09E-06 | 1.22E-05 |
| ZDHHC14  | 0.1278  | 1.38E-02 | 3.81E-02 |
| ZDHHC15  | -0.0365 | 4.84E-01 | 6.12E-01 |
| ZDHHC16  | 0.0177  | 7.34E-01 | 8.20E-01 |
| ZDHHC17  | 0.1151  | 2.66E-02 | 6.49E-02 |
| ZDHHC18  | 0.1740  | 7.61E-04 | 3.41E-03 |
| ZDHHC19  | -0.0870 | 9.41E-02 | 1.77E-01 |
| ZDHHC1   | 0.0174  | 7.38E-01 | 8.23E-01 |
| ZDHHC20  | -0.0077 | 8.83E-01 | 9.25E-01 |
| ZDHHC21  | 0.1235  | 1.73E-02 | 4.57E-02 |
| ZDHHC22  | 0.0015  | 9.78E-01 | 9.86E-01 |
| ZDHHC23  | 0.1479  | 4.31E-03 | 1.46E-02 |
| ZDHHC24  | -0.0894 | 8.57E-02 | 1.64E-01 |
| ZDHHC2   | 0.0371  | 4.76E-01 | 6.05E-01 |
| ZDHHC3   | -0.0743 | 1.53E-01 | 2.58E-01 |
| ZDHHC4   | -0.0858 | 9.88E-02 | 1.84E-01 |
| ZDHHC5   | -0.0106 | 8.39E-01 | 8.94E-01 |
| ZDHHC6   | 0.0774  | 1.37E-01 | 2.36E-01 |
| ZDHHC7   | 0.0020  | 9.69E-01 | 9.81E-01 |
| ZDHHC8P1 | 0.2252  | 1.19E-05 | 9.79E-05 |
| ZDHHC8   | -0.2019 | 9.03E-05 | 5.59E-04 |
| ZDHHC9   | 0.0489  | 3.47E-01 | 4.80E-01 |
| ZEB1     | -0.0696 | 1.81E-01 | 2.93E-01 |
| ZEB2     | -0.1576 | 2.33E-03 | 8.73E-03 |
| ZER1     | 0.1662  | 1.32E-03 | 5.42E-03 |
| ZFAND1   | 0.0079  | 8.79E-01 | 9.22E-01 |
| ZFAND2A  | 0.0828  | 1.11E-01 | 2.02E-01 |
| ZFAND2B  | 0.0085  | 8.71E-01 | 9.17E-01 |
| ZFAND3   | 0.0229  | 6.61E-01 | 7.62E-01 |
| ZFAND5   | -0.0787 | 1.30E-01 | 2.28E-01 |
| ZFAND6   | -0.0544 | 2.96E-01 | 4.25E-01 |
| ZFATAS   | 0.0299  | 5.66E-01 | 6.84E-01 |
| ZFAT     | 0.0924  | 7.54E-02 | 1.49E-01 |
| ZFC3H1   | 0.1559  | 2.59E-03 | 9.56E-03 |
| ZFHX3    | 0.0225  | 6.66E-01 | 7.66E-01 |
| ZFHX4    | -0.0990 | 5.68E-02 | 1.19E-01 |
| ZFP106   | -0.0316 | 5.44E-01 | 6.65E-01 |
| ZFP112   | 0.1699  | 1.02E-03 | 4.37E-03 |
| ZFP14    | 0.1588  | 2.15E-03 | 8.18E-03 |

|            |         |          |          |
|------------|---------|----------|----------|
| ZFP161     | -0.0111 | 8.32E-01 | 8.90E-01 |
| ZFP1       | -0.2064 | 6.19E-05 | 4.06E-04 |
| ZFP28      | 0.0856  | 9.99E-02 | 1.86E-01 |
| ZFP2       | 0.0610  | 2.41E-01 | 3.66E-01 |
| ZFP30      | 0.0984  | 5.82E-02 | 1.21E-01 |
| ZFP36L1    | -0.0464 | 3.73E-01 | 5.06E-01 |
| ZFP36L2    | 0.0590  | 2.57E-01 | 3.83E-01 |
| ZFP36      | -0.1656 | 1.37E-03 | 5.58E-03 |
| ZFP37      | 0.1684  | 1.13E-03 | 4.77E-03 |
| ZFP3       | 0.0294  | 5.72E-01 | 6.89E-01 |
| ZFP41      | 0.0667  | 2.00E-01 | 3.16E-01 |
| ZFP42      | 0.0888  | 8.78E-02 | 1.67E-01 |
| ZFP57      | -0.0109 | 8.34E-01 | 8.91E-01 |
| ZFP62      | 0.2503  | 1.05E-06 | 1.18E-05 |
| ZFP64      | 0.1925  | 1.91E-04 | 1.06E-03 |
| ZFP82      | 0.1237  | 1.71E-02 | 4.53E-02 |
| ZFP90      | -0.0661 | 2.04E-01 | 3.22E-01 |
| ZFP91-CNTF | -0.0886 | 8.83E-02 | 1.68E-01 |
| ZFP91      | -0.0532 | 3.07E-01 | 4.37E-01 |
| ZFP92      | 0.1186  | 2.23E-02 | 5.61E-02 |
| ZFPL1      | 0.0957  | 6.57E-02 | 1.33E-01 |
| ZFPM1      | -0.0616 | 2.37E-01 | 3.60E-01 |
| ZFPM2      | -0.1899 | 2.34E-04 | 1.26E-03 |
| ZFR2       | 0.0003  | 9.96E-01 | 9.97E-01 |
| ZFR        | 0.0836  | 1.08E-01 | 1.97E-01 |
| ZFX        | 0.0958  | 6.52E-02 | 1.33E-01 |
| ZFYVE16    | 0.0989  | 5.70E-02 | 1.19E-01 |
| ZFYVE19    | 0.0070  | 8.93E-01 | 9.32E-01 |
| ZFYVE1     | -0.2506 | 1.02E-06 | 1.15E-05 |
| ZFYVE20    | 0.0728  | 1.61E-01 | 2.68E-01 |
| ZFYVE21    | -0.2600 | 3.82E-07 | 4.83E-06 |
| ZFYVE26    | 0.0717  | 1.68E-01 | 2.77E-01 |
| ZFYVE27    | -0.0515 | 3.23E-01 | 4.53E-01 |
| ZFYVE28    | -0.1968 | 1.36E-04 | 7.91E-04 |
| ZFYVE9     | -0.0776 | 1.35E-01 | 2.35E-01 |
| ZFY        | -0.0438 | 4.00E-01 | 5.33E-01 |
| ZG16B      | 0.1078  | 3.80E-02 | 8.66E-02 |
| ZG16       | -0.1436 | 5.57E-03 | 1.80E-02 |
| ZGLP1      | 0.1642  | 1.51E-03 | 6.07E-03 |
| ZGPAT      | -0.1190 | 2.19E-02 | 5.53E-02 |
| ZHX1       | -0.0866 | 9.60E-02 | 1.80E-01 |
| ZHX2       | -0.0098 | 8.51E-01 | 9.03E-01 |
| ZHX3       | -0.2367 | 4.05E-06 | 3.88E-05 |
| ZIC1       | -0.0503 | 3.34E-01 | 4.65E-01 |

|          |         |          |          |
|----------|---------|----------|----------|
| ZIC2     | 0.2460  | 1.62E-06 | 1.73E-05 |
| ZIC3     | 0.0549  | 2.92E-01 | 4.21E-01 |
| ZIC4     | 0.0195  | 7.08E-01 | 8.00E-01 |
| ZIC5     | 0.2838  | 2.65E-08 | 4.41E-07 |
| ZIK1     | 0.0715  | 1.69E-01 | 2.78E-01 |
| ZIM2     | 0.1838  | 3.72E-04 | 1.86E-03 |
| ZIM3     | 0.0882  | 8.97E-02 | 1.71E-01 |
| ZKSCAN1  | -0.0890 | 8.70E-02 | 1.66E-01 |
| ZKSCAN2  | -0.1390 | 7.33E-03 | 2.26E-02 |
| ZKSCAN3  | 0.2852  | 2.26E-08 | 3.85E-07 |
| ZKSCAN4  | 0.1481  | 4.25E-03 | 1.45E-02 |
| ZKSCAN5  | 0.0148  | 7.76E-01 | 8.50E-01 |
| ZMAT1    | -0.0164 | 7.54E-01 | 8.34E-01 |
| ZMAT2    | -0.0310 | 5.52E-01 | 6.72E-01 |
| ZMAT3    | -0.2003 | 1.03E-04 | 6.22E-04 |
| ZMAT4    | 0.0748  | 1.51E-01 | 2.55E-01 |
| ZMAT5    | 0.0916  | 7.82E-02 | 1.53E-01 |
| ZMIZ1    | 0.1223  | 1.85E-02 | 4.81E-02 |
| ZMIZ2    | 0.2732  | 8.98E-08 | 1.32E-06 |
| ZMPSTE24 | -0.1126 | 3.02E-02 | 7.18E-02 |
| ZMYM1    | 0.2617  | 3.15E-07 | 4.08E-06 |
| ZMYM2    | 0.0943  | 6.97E-02 | 1.40E-01 |
| ZMYM3    | 0.1731  | 8.13E-04 | 3.60E-03 |
| ZMYM4    | 0.1432  | 5.74E-03 | 1.85E-02 |
| ZMYM5    | 0.0703  | 1.77E-01 | 2.88E-01 |
| ZMYM6    | 0.0531  | 3.08E-01 | 4.38E-01 |
| ZMYND10  | 0.2197  | 1.96E-05 | 1.52E-04 |
| ZMYND11  | -0.0436 | 4.02E-01 | 5.35E-01 |
| ZMYND12  | -0.2244 | 1.28E-05 | 1.04E-04 |
| ZMYND15  | -0.0336 | 5.18E-01 | 6.42E-01 |
| ZMYND17  | 0.0582  | 2.64E-01 | 3.91E-01 |
| ZMYND19  | 0.3162  | 4.63E-10 | 1.19E-08 |
| ZMYND8   | 0.0391  | 4.52E-01 | 5.83E-01 |
| ZNF100   | 0.1658  | 1.36E-03 | 5.54E-03 |
| ZNF101   | 0.2321  | 6.28E-06 | 5.64E-05 |
| ZNF107   | 0.2120  | 3.85E-05 | 2.71E-04 |
| ZNF10    | 0.0731  | 1.60E-01 | 2.66E-01 |
| ZNF114   | -0.0004 | 9.94E-01 | 9.96E-01 |
| ZNF117   | 0.1735  | 7.91E-04 | 3.52E-03 |
| ZNF121   | -0.0190 | 7.16E-01 | 8.07E-01 |
| ZNF124   | 0.2110  | 4.21E-05 | 2.92E-04 |
| ZNF12    | 0.1834  | 3.84E-04 | 1.91E-03 |
| ZNF131   | 0.2373  | 3.81E-06 | 3.67E-05 |
| ZNF132   | -0.0327 | 5.30E-01 | 6.52E-01 |



|         |         |          |          |
|---------|---------|----------|----------|
| ZNF133  | 0.3377  | 2.40E-11 | 8.01E-10 |
| ZNF134  | 0.0610  | 2.41E-01 | 3.66E-01 |
| ZNF135  | 0.1184  | 2.26E-02 | 5.67E-02 |
| ZNF136  | 0.0035  | 9.47E-01 | 9.67E-01 |
| ZNF137  | 0.1875  | 2.81E-04 | 1.47E-03 |
| ZNF138  | 0.0357  | 4.93E-01 | 6.20E-01 |
| ZNF140  | 0.0825  | 1.13E-01 | 2.04E-01 |
| ZNF141  | 0.1171  | 2.41E-02 | 5.99E-02 |
| ZNF142  | 0.3207  | 2.56E-10 | 6.99E-09 |
| ZNF143  | 0.1837  | 3.77E-04 | 1.88E-03 |
| ZNF146  | 0.1158  | 2.57E-02 | 6.30E-02 |
| ZNF148  | 0.0263  | 6.14E-01 | 7.24E-01 |
| ZNF14   | 0.1683  | 1.14E-03 | 4.81E-03 |
| ZNF154  | -0.0892 | 8.62E-02 | 1.65E-01 |
| ZNF155  | 0.1430  | 5.78E-03 | 1.86E-02 |
| ZNF157  | 0.1636  | 1.57E-03 | 6.28E-03 |
| ZNF160  | 0.0779  | 1.34E-01 | 2.33E-01 |
| ZNF165  | 0.2119  | 3.87E-05 | 2.73E-04 |
| ZNF167  | 0.1044  | 4.45E-02 | 9.80E-02 |
| ZNF169  | 0.3559  | 1.62E-12 | 6.91E-11 |
| ZNF16   | 0.1819  | 4.29E-04 | 2.09E-03 |
| ZNF174  | 0.2187  | 2.13E-05 | 1.63E-04 |
| ZNF175  | -0.0120 | 8.18E-01 | 8.81E-01 |
| ZNF177  | 0.1708  | 9.58E-04 | 4.15E-03 |
| ZNF17   | 0.0694  | 1.83E-01 | 2.95E-01 |
| ZNF180  | 0.1099  | 3.44E-02 | 8.00E-02 |
| ZNF181  | 0.0328  | 5.29E-01 | 6.52E-01 |
| ZNF182  | 0.1707  | 9.60E-04 | 4.16E-03 |
| ZNF184  | 0.1555  | 2.68E-03 | 9.82E-03 |
| ZNF185  | 0.1841  | 3.65E-04 | 1.84E-03 |
| ZNF187  | 0.1937  | 1.74E-04 | 9.79E-04 |
| ZNF189  | 0.2054  | 6.75E-05 | 4.37E-04 |
| ZNF18   | -0.1312 | 1.14E-02 | 3.25E-02 |
| ZNF192  | 0.0009  | 9.87E-01 | 9.92E-01 |
| ZNF193  | 0.2849  | 2.34E-08 | 3.97E-07 |
| ZNF195  | 0.2258  | 1.12E-05 | 9.31E-05 |
| ZNF197  | 0.0465  | 3.72E-01 | 5.05E-01 |
| ZNF19   | 0.0372  | 4.75E-01 | 6.04E-01 |
| ZNF200  | 0.1369  | 8.27E-03 | 2.50E-02 |
| ZNF202  | 0.3725  | 1.17E-13 | 6.18E-12 |
| ZNF204P | 0.1997  | 1.08E-04 | 6.48E-04 |
| ZNF205  | 0.1951  | 1.56E-04 | 8.91E-04 |
| ZNF207  | 0.4347  | 1.57E-18 | 2.66E-16 |
| ZNF208  | 0.0447  | 3.90E-01 | 5.24E-01 |

|        |         |          |          |
|--------|---------|----------|----------|
| ZNF20  | 0.0975  | 6.05E-02 | 1.25E-01 |
| ZNF211 | 0.2089  | 5.03E-05 | 3.40E-04 |
| ZNF212 | 0.0326  | 5.31E-01 | 6.54E-01 |
| ZNF213 | 0.3648  | 4.02E-13 | 1.93E-11 |
| ZNF214 | -0.0380 | 4.65E-01 | 5.95E-01 |
| ZNF215 | 0.1285  | 1.33E-02 | 3.69E-02 |
| ZNF217 | 0.0706  | 1.75E-01 | 2.85E-01 |
| ZNF219 | -0.0496 | 3.41E-01 | 4.73E-01 |
| ZNF221 | 0.0972  | 6.15E-02 | 1.27E-01 |
| ZNF222 | 0.3039  | 2.28E-09 | 4.96E-08 |
| ZNF223 | 0.1621  | 1.73E-03 | 6.82E-03 |
| ZNF224 | 0.1431  | 5.76E-03 | 1.85E-02 |
| ZNF225 | 0.1262  | 1.50E-02 | 4.07E-02 |
| ZNF226 | 0.2115  | 4.00E-05 | 2.80E-04 |
| ZNF227 | 0.1427  | 5.90E-03 | 1.89E-02 |
| ZNF229 | 0.1490  | 4.01E-03 | 1.38E-02 |
| ZNF22  | -0.0390 | 4.54E-01 | 5.85E-01 |
| ZNF230 | 0.2406  | 2.77E-06 | 2.77E-05 |
| ZNF232 | 0.2139  | 3.25E-05 | 2.34E-04 |
| ZNF233 | 0.1888  | 2.56E-04 | 1.36E-03 |
| ZNF234 | 0.2590  | 4.24E-07 | 5.30E-06 |
| ZNF235 | 0.2210  | 1.74E-05 | 1.37E-04 |
| ZNF236 | 0.0940  | 7.05E-02 | 1.41E-01 |
| ZNF238 | 0.0870  | 9.41E-02 | 1.77E-01 |
| ZNF239 | 0.2411  | 2.64E-06 | 2.65E-05 |
| ZNF23  | -0.0642 | 2.17E-01 | 3.37E-01 |
| ZNF248 | 0.3140  | 6.24E-10 | 1.55E-08 |
| ZNF24  | -0.0056 | 9.14E-01 | 9.46E-01 |
| ZNF250 | 0.1362  | 8.60E-03 | 2.59E-02 |
| ZNF251 | 0.2595  | 4.02E-07 | 5.05E-06 |
| ZNF252 | -0.0879 | 9.10E-02 | 1.72E-01 |
| ZNF253 | 0.0757  | 1.46E-01 | 2.48E-01 |
| ZNF254 | -0.0049 | 9.24E-01 | 9.52E-01 |
| ZNF256 | 0.2027  | 8.43E-05 | 5.28E-04 |
| ZNF257 | 0.1477  | 4.35E-03 | 1.47E-02 |
| ZNF259 | 0.0844  | 1.05E-01 | 1.92E-01 |
| ZNF25  | -0.0016 | 9.76E-01 | 9.85E-01 |
| ZNF260 | 0.2004  | 1.01E-04 | 6.15E-04 |
| ZNF263 | 0.2743  | 7.95E-08 | 1.18E-06 |
| ZNF264 | 0.0856  | 9.98E-02 | 1.86E-01 |
| ZNF266 | 0.1737  | 7.77E-04 | 3.46E-03 |
| ZNF267 | 0.1146  | 2.73E-02 | 6.62E-02 |
| ZNF268 | -0.0645 | 2.15E-01 | 3.35E-01 |
| ZNF26  | 0.3476  | 5.65E-12 | 2.16E-10 |

|         |         |          |          |
|---------|---------|----------|----------|
| ZNF271  | 0.0329  | 5.27E-01 | 6.50E-01 |
| ZNF273  | 0.2047  | 7.15E-05 | 4.59E-04 |
| ZNF274  | 0.0979  | 5.96E-02 | 1.24E-01 |
| ZNF275  | 0.0210  | 6.87E-01 | 7.83E-01 |
| ZNF276  | -0.0321 | 5.38E-01 | 6.59E-01 |
| ZNF277  | -0.2962 | 6.00E-09 | 1.18E-07 |
| ZNF280A | 0.1902  | 2.29E-04 | 1.24E-03 |
| ZNF280B | 0.1141  | 2.80E-02 | 6.77E-02 |
| ZNF280C | 0.2787  | 4.82E-08 | 7.54E-07 |
| ZNF280D | -0.0472 | 3.65E-01 | 4.97E-01 |
| ZNF281  | 0.0541  | 2.99E-01 | 4.28E-01 |
| ZNF282  | 0.1064  | 4.05E-02 | 9.11E-02 |
| ZNF283  | 0.2564  | 5.57E-07 | 6.71E-06 |
| ZNF284  | 0.2177  | 2.33E-05 | 1.77E-04 |
| ZNF285  | 0.2171  | 2.46E-05 | 1.85E-04 |
| ZNF286A | 0.2097  | 4.69E-05 | 3.20E-04 |
| ZNF286B | 0.2024  | 8.63E-05 | 5.37E-04 |
| ZNF287  | 0.0857  | 9.95E-02 | 1.85E-01 |
| ZNF28   | 0.1656  | 1.37E-03 | 5.59E-03 |
| ZNF292  | 0.1800  | 4.96E-04 | 2.36E-03 |
| ZNF295  | -0.0906 | 8.12E-02 | 1.58E-01 |
| ZNF296  | 0.3529  | 2.54E-12 | 1.05E-10 |
| ZNF2    | 0.2047  | 7.11E-05 | 4.57E-04 |
| ZNF300  | 0.2588  | 4.33E-07 | 5.39E-06 |
| ZNF302  | 0.2346  | 4.95E-06 | 4.61E-05 |
| ZNF304  | 0.1247  | 1.62E-02 | 4.33E-02 |
| ZNF30   | 0.2226  | 1.50E-05 | 1.20E-04 |
| ZNF311  | 0.0856  | 9.99E-02 | 1.86E-01 |
| ZNF317  | -0.0358 | 4.92E-01 | 6.19E-01 |
| ZNF318  | 0.2016  | 9.22E-05 | 5.69E-04 |
| ZNF319  | 0.0123  | 8.14E-01 | 8.77E-01 |
| ZNF320  | 0.1499  | 3.81E-03 | 1.32E-02 |
| ZNF321  | 0.1796  | 5.08E-04 | 2.41E-03 |
| ZNF322A | 0.1951  | 1.56E-04 | 8.93E-04 |
| ZNF322B | 0.1997  | 1.08E-04 | 6.48E-04 |
| ZNF323  | 0.0852  | 1.01E-01 | 1.88E-01 |
| ZNF324B | 0.2105  | 4.38E-05 | 3.03E-04 |
| ZNF324  | 0.0724  | 1.64E-01 | 2.72E-01 |
| ZNF326  | 0.0345  | 5.08E-01 | 6.33E-01 |
| ZNF329  | 0.0931  | 7.33E-02 | 1.46E-01 |
| ZNF32   | 0.1810  | 4.58E-04 | 2.21E-03 |
| ZNF330  | -0.3335 | 4.37E-11 | 1.39E-09 |
| ZNF331  | 0.0552  | 2.89E-01 | 4.18E-01 |
| ZNF333  | 0.1437  | 5.54E-03 | 1.79E-02 |

|          |         |          |          |
|----------|---------|----------|----------|
| ZNF334   | -0.0615 | 2.37E-01 | 3.61E-01 |
| ZNF335   | 0.3852  | 1.43E-14 | 8.97E-13 |
| ZNF337   | 0.3116  | 8.50E-10 | 2.05E-08 |
| ZNF33A   | 0.1456  | 4.96E-03 | 1.64E-02 |
| ZNF33B   | 0.1301  | 1.21E-02 | 3.42E-02 |
| ZNF341   | 0.2026  | 8.50E-05 | 5.32E-04 |
| ZNF343   | 0.1927  | 1.89E-04 | 1.05E-03 |
| ZNF345   | 0.2042  | 7.43E-05 | 4.74E-04 |
| ZNF346   | 0.2580  | 4.69E-07 | 5.79E-06 |
| ZNF347   | 0.0928  | 7.44E-02 | 1.47E-01 |
| ZNF34    | 0.0619  | 2.35E-01 | 3.58E-01 |
| ZNF350   | 0.1920  | 1.99E-04 | 1.10E-03 |
| ZNF354A  | 0.1892  | 2.47E-04 | 1.32E-03 |
| ZNF354B  | 0.1649  | 1.43E-03 | 5.82E-03 |
| ZNF354C  | 0.0527  | 3.12E-01 | 4.41E-01 |
| ZNF358   | -0.0959 | 6.49E-02 | 1.32E-01 |
| ZNF35    | 0.1670  | 1.25E-03 | 5.18E-03 |
| ZNF362   | 0.0964  | 6.37E-02 | 1.30E-01 |
| ZNF365   | 0.0382  | 4.63E-01 | 5.93E-01 |
| ZNF366   | -0.1749 | 7.17E-04 | 3.23E-03 |
| ZNF367   | 0.2702  | 1.26E-07 | 1.79E-06 |
| ZNF37A   | 0.0825  | 1.13E-01 | 2.04E-01 |
| ZNF37B   | 0.3676  | 2.59E-13 | 1.29E-11 |
| ZNF382   | 0.0989  | 5.71E-02 | 1.19E-01 |
| ZNF383   | 0.1966  | 1.38E-04 | 8.04E-04 |
| ZNF384   | 0.3226  | 1.96E-10 | 5.46E-09 |
| ZNF385A  | 0.0095  | 8.56E-01 | 9.06E-01 |
| ZNF385B  | -0.1744 | 7.42E-04 | 3.33E-03 |
| ZNF385D  | -0.0685 | 1.88E-01 | 3.02E-01 |
| ZNF389   | 0.1494  | 3.92E-03 | 1.35E-02 |
| ZNF391   | 0.1861  | 3.13E-04 | 1.62E-03 |
| ZNF394   | -0.0015 | 9.77E-01 | 9.85E-01 |
| ZNF395   | 0.0327  | 5.30E-01 | 6.52E-01 |
| ZNF396   | 0.0822  | 1.14E-01 | 2.06E-01 |
| ZNF397OS | 0.1613  | 1.83E-03 | 7.15E-03 |
| ZNF397   | 0.0010  | 9.85E-01 | 9.91E-01 |
| ZNF398   | 0.0377  | 4.69E-01 | 5.98E-01 |
| ZNF3     | -0.0539 | 3.01E-01 | 4.30E-01 |
| ZNF404   | 0.2587  | 4.36E-07 | 5.43E-06 |
| ZNF407   | 0.0646  | 2.14E-01 | 3.34E-01 |
| ZNF408   | 0.1957  | 1.48E-04 | 8.55E-04 |
| ZNF410   | 0.1369  | 8.30E-03 | 2.51E-02 |
| ZNF414   | 0.0921  | 7.66E-02 | 1.51E-01 |
| ZNF415   | 0.1077  | 3.81E-02 | 8.67E-02 |

|        |         |          |          |
|--------|---------|----------|----------|
| ZNF416 | 0.2315  | 6.63E-06 | 5.91E-05 |
| ZNF417 | 0.1009  | 5.22E-02 | 1.11E-01 |
| ZNF418 | 0.1125  | 3.02E-02 | 7.19E-02 |
| ZNF419 | 0.2302  | 7.49E-06 | 6.53E-05 |
| ZNF41  | -0.0165 | 7.52E-01 | 8.33E-01 |
| ZNF420 | 0.0875  | 9.24E-02 | 1.75E-01 |
| ZNF423 | -0.1792 | 5.22E-04 | 2.47E-03 |
| ZNF425 | -0.1339 | 9.81E-03 | 2.88E-02 |
| ZNF426 | 0.0123  | 8.13E-01 | 8.77E-01 |
| ZNF428 | -0.0546 | 2.94E-01 | 4.23E-01 |
| ZNF429 | -0.0381 | 4.65E-01 | 5.95E-01 |
| ZNF430 | 0.0723  | 1.65E-01 | 2.72E-01 |
| ZNF431 | 0.1656  | 1.37E-03 | 5.59E-03 |
| ZNF432 | 0.1848  | 3.46E-04 | 1.76E-03 |
| ZNF433 | 0.1000  | 5.43E-02 | 1.15E-01 |
| ZNF434 | 0.0992  | 5.62E-02 | 1.18E-01 |
| ZNF436 | 0.0107  | 8.37E-01 | 8.93E-01 |
| ZNF438 | 0.1279  | 1.37E-02 | 3.78E-02 |
| ZNF439 | 0.0863  | 9.68E-02 | 1.81E-01 |
| ZNF43  | 0.1103  | 3.37E-02 | 7.87E-02 |
| ZNF440 | 0.1083  | 3.70E-02 | 8.48E-02 |
| ZNF441 | -0.0548 | 2.93E-01 | 4.22E-01 |
| ZNF442 | 0.0363  | 4.86E-01 | 6.14E-01 |
| ZNF443 | 0.1290  | 1.29E-02 | 3.60E-02 |
| ZNF444 | -0.0139 | 7.89E-01 | 8.60E-01 |
| ZNF445 | 0.1629  | 1.65E-03 | 6.56E-03 |
| ZNF446 | 0.2687  | 1.48E-07 | 2.07E-06 |
| ZNF449 | 0.2099  | 4.59E-05 | 3.15E-04 |
| ZNF44  | 0.1589  | 2.15E-03 | 8.17E-03 |
| ZNF451 | 0.0746  | 1.52E-01 | 2.56E-01 |
| ZNF454 | 0.0951  | 6.72E-02 | 1.36E-01 |
| ZNF45  | 0.1861  | 3.12E-04 | 1.62E-03 |
| ZNF460 | -0.0330 | 5.26E-01 | 6.49E-01 |
| ZNF461 | 0.2922  | 9.77E-09 | 1.82E-07 |
| ZNF462 | -0.1411 | 6.47E-03 | 2.04E-02 |
| ZNF467 | -0.0950 | 6.75E-02 | 1.36E-01 |
| ZNF468 | 0.1174  | 2.38E-02 | 5.91E-02 |
| ZNF469 | 0.0025  | 9.62E-01 | 9.76E-01 |
| ZNF470 | 0.0958  | 6.53E-02 | 1.33E-01 |
| ZNF471 | 0.0783  | 1.32E-01 | 2.30E-01 |
| ZNF473 | 0.3200  | 2.81E-10 | 7.57E-09 |
| ZNF474 | -0.0041 | 9.37E-01 | 9.61E-01 |
| ZNF479 | 0.0593  | 2.54E-01 | 3.80E-01 |
| ZNF480 | 0.1094  | 3.52E-02 | 8.15E-02 |

|         |         |          |          |
|---------|---------|----------|----------|
| ZNF483  | 0.0803  | 1.23E-01 | 2.18E-01 |
| ZNF484  | 0.1759  | 6.65E-04 | 3.03E-03 |
| ZNF485  | 0.2047  | 7.16E-05 | 4.60E-04 |
| ZNF486  | 0.1097  | 3.46E-02 | 8.03E-02 |
| ZNF487  | -0.0916 | 7.81E-02 | 1.53E-01 |
| ZNF488  | 0.2021  | 8.87E-05 | 5.51E-04 |
| ZNF48   | 0.2094  | 4.79E-05 | 3.27E-04 |
| ZNF490  | 0.0519  | 3.19E-01 | 4.49E-01 |
| ZNF491  | 0.2074  | 5.68E-05 | 3.78E-04 |
| ZNF492  | 0.1382  | 7.70E-03 | 2.36E-02 |
| ZNF493  | 0.1121  | 3.09E-02 | 7.32E-02 |
| ZNF496  | 0.1411  | 6.49E-03 | 2.05E-02 |
| ZNF497  | 0.0997  | 5.50E-02 | 1.16E-01 |
| ZNF498  | 0.0745  | 1.52E-01 | 2.57E-01 |
| ZNF500  | 0.1510  | 3.55E-03 | 1.24E-02 |
| ZNF501  | 0.0841  | 1.06E-01 | 1.94E-01 |
| ZNF502  | 0.0770  | 1.39E-01 | 2.39E-01 |
| ZNF503  | -0.0521 | 3.17E-01 | 4.47E-01 |
| ZNF506  | 0.1666  | 1.28E-03 | 5.31E-03 |
| ZNF507  | 0.2362  | 4.25E-06 | 4.04E-05 |
| ZNF510  | 0.0660  | 2.05E-01 | 3.22E-01 |
| ZNF511  | -0.0391 | 4.53E-01 | 5.84E-01 |
| ZNF512B | 0.1313  | 1.14E-02 | 3.24E-02 |
| ZNF512  | 0.2853  | 2.21E-08 | 3.79E-07 |
| ZNF513  | 0.0037  | 9.43E-01 | 9.65E-01 |
| ZNF514  | 0.2549  | 6.50E-07 | 7.73E-06 |
| ZNF516  | 0.0484  | 3.53E-01 | 4.84E-01 |
| ZNF517  | 0.1834  | 3.85E-04 | 1.92E-03 |
| ZNF518A | 0.1376  | 7.95E-03 | 2.42E-02 |
| ZNF518B | 0.0192  | 7.12E-01 | 8.03E-01 |
| ZNF519  | 0.3142  | 6.08E-10 | 1.52E-08 |
| ZNF521  | -0.2417 | 2.49E-06 | 2.52E-05 |
| ZNF524  | -0.0229 | 6.60E-01 | 7.61E-01 |
| ZNF525  | 0.1815  | 4.43E-04 | 2.15E-03 |
| ZNF526  | 0.2431  | 2.16E-06 | 2.23E-05 |
| ZNF527  | 0.2069  | 5.93E-05 | 3.91E-04 |
| ZNF528  | 0.1201  | 2.07E-02 | 5.27E-02 |
| ZNF529  | 0.2878  | 1.66E-08 | 2.94E-07 |
| ZNF530  | 0.3457  | 7.46E-12 | 2.76E-10 |
| ZNF532  | 0.1539  | 2.96E-03 | 1.07E-02 |
| ZNF534  | 0.0979  | 5.97E-02 | 1.24E-01 |
| ZNF536  | 0.1036  | 4.61E-02 | 1.01E-01 |
| ZNF540  | 0.0747  | 1.51E-01 | 2.55E-01 |
| ZNF541  | -0.1163 | 2.51E-02 | 6.17E-02 |

|         |         |          |          |
|---------|---------|----------|----------|
| ZNF542  | -0.0005 | 9.93E-01 | 9.96E-01 |
| ZNF543  | 0.1440  | 5.47E-03 | 1.78E-02 |
| ZNF544  | 0.2237  | 1.37E-05 | 1.10E-04 |
| ZNF546  | 0.0911  | 7.96E-02 | 1.55E-01 |
| ZNF547  | 0.2016  | 9.23E-05 | 5.69E-04 |
| ZNF548  | 0.2013  | 9.43E-05 | 5.80E-04 |
| ZNF549  | 0.0419  | 4.21E-01 | 5.54E-01 |
| ZNF550  | 0.2378  | 3.64E-06 | 3.53E-05 |
| ZNF551  | 0.1389  | 7.37E-03 | 2.27E-02 |
| ZNF552  | 0.2579  | 4.73E-07 | 5.83E-06 |
| ZNF554  | 0.1571  | 2.41E-03 | 8.97E-03 |
| ZNF555  | 0.1282  | 1.34E-02 | 3.73E-02 |
| ZNF556  | 0.0923  | 7.58E-02 | 1.49E-01 |
| ZNF557  | 0.0699  | 1.79E-01 | 2.91E-01 |
| ZNF558  | 0.0686  | 1.88E-01 | 3.01E-01 |
| ZNF559  | 0.1402  | 6.83E-03 | 2.13E-02 |
| ZNF560  | 0.1806  | 4.73E-04 | 2.27E-03 |
| ZNF561  | -0.0327 | 5.30E-01 | 6.53E-01 |
| ZNF562  | 0.0293  | 5.73E-01 | 6.91E-01 |
| ZNF563  | -0.0508 | 3.29E-01 | 4.60E-01 |
| ZNF564  | 0.0183  | 7.25E-01 | 8.13E-01 |
| ZNF565  | 0.2538  | 7.28E-07 | 8.53E-06 |
| ZNF566  | 0.1018  | 5.02E-02 | 1.08E-01 |
| ZNF567  | 0.2489  | 1.20E-06 | 1.33E-05 |
| ZNF568  | 0.0972  | 6.15E-02 | 1.27E-01 |
| ZNF569  | 0.2081  | 5.35E-05 | 3.59E-04 |
| ZNF570  | 0.0850  | 1.02E-01 | 1.89E-01 |
| ZNF571  | 0.1437  | 5.55E-03 | 1.80E-02 |
| ZNF572  | 0.1767  | 6.27E-04 | 2.89E-03 |
| ZNF573  | 0.0889  | 8.74E-02 | 1.67E-01 |
| ZNF574  | 0.1580  | 2.28E-03 | 8.59E-03 |
| ZNF575  | -0.0736 | 1.57E-01 | 2.63E-01 |
| ZNF576  | 0.0160  | 7.59E-01 | 8.38E-01 |
| ZNF577  | 0.1646  | 1.47E-03 | 5.92E-03 |
| ZNF578  | 0.1266  | 1.46E-02 | 3.99E-02 |
| ZNF579  | 0.1055  | 4.22E-02 | 9.40E-02 |
| ZNF57   | 0.1419  | 6.20E-03 | 1.97E-02 |
| ZNF580  | 0.1055  | 4.23E-02 | 9.42E-02 |
| ZNF581  | 0.1268  | 1.46E-02 | 3.98E-02 |
| ZNF582  | 0.0251  | 6.30E-01 | 7.37E-01 |
| ZNF583  | 0.1110  | 3.25E-02 | 7.64E-02 |
| ZNF584  | -0.1077 | 3.80E-02 | 8.67E-02 |
| ZNF585A | 0.2354  | 4.56E-06 | 4.30E-05 |
| ZNF585B | 0.1328  | 1.04E-02 | 3.03E-02 |

|        |         |          |          |
|--------|---------|----------|----------|
| ZNF586 | 0.1438  | 5.52E-03 | 1.79E-02 |
| ZNF587 | 0.1397  | 7.03E-03 | 2.18E-02 |
| ZNF589 | 0.2864  | 1.96E-08 | 3.40E-07 |
| ZNF592 | 0.0352  | 4.99E-01 | 6.25E-01 |
| ZNF593 | -0.0833 | 1.09E-01 | 1.99E-01 |
| ZNF594 | 0.2276  | 9.54E-06 | 8.06E-05 |
| ZNF595 | 0.0775  | 1.36E-01 | 2.36E-01 |
| ZNF596 | 0.0850  | 1.02E-01 | 1.88E-01 |
| ZNF597 | -0.0025 | 9.61E-01 | 9.76E-01 |
| ZNF598 | 0.1151  | 2.66E-02 | 6.49E-02 |
| ZNF599 | 0.1541  | 2.93E-03 | 1.06E-02 |
| ZNF600 | 0.1637  | 1.56E-03 | 6.24E-03 |
| ZNF605 | 0.2062  | 6.32E-05 | 4.12E-04 |
| ZNF606 | 0.1717  | 8.99E-04 | 3.92E-03 |
| ZNF607 | 0.2179  | 2.29E-05 | 1.74E-04 |
| ZNF608 | 0.0806  | 1.21E-01 | 2.16E-01 |
| ZNF609 | -0.0167 | 7.49E-01 | 8.31E-01 |
| ZNF610 | 0.0927  | 7.46E-02 | 1.47E-01 |
| ZNF611 | 0.1491  | 4.00E-03 | 1.38E-02 |
| ZNF613 | 0.2074  | 5.67E-05 | 3.78E-04 |
| ZNF614 | 0.1601  | 1.98E-03 | 7.65E-03 |
| ZNF615 | 0.1540  | 2.95E-03 | 1.06E-02 |
| ZNF616 | -0.0442 | 3.96E-01 | 5.29E-01 |
| ZNF618 | 0.2430  | 2.17E-06 | 2.24E-05 |
| ZNF619 | 0.0148  | 7.77E-01 | 8.51E-01 |
| ZNF620 | 0.2230  | 1.45E-05 | 1.17E-04 |
| ZNF621 | 0.1095  | 3.51E-02 | 8.11E-02 |
| ZNF622 | 0.0802  | 1.23E-01 | 2.18E-01 |
| ZNF623 | 0.1659  | 1.34E-03 | 5.51E-03 |
| ZNF624 | 0.1408  | 6.61E-03 | 2.08E-02 |
| ZNF625 | 0.0835  | 1.08E-01 | 1.98E-01 |
| ZNF626 | 0.0358  | 4.92E-01 | 6.19E-01 |
| ZNF627 | 0.0615  | 2.37E-01 | 3.61E-01 |
| ZNF628 | 0.1266  | 1.47E-02 | 4.00E-02 |
| ZNF629 | 0.0756  | 1.46E-01 | 2.49E-01 |
| ZNF630 | 0.1328  | 1.05E-02 | 3.03E-02 |
| ZNF638 | 0.2167  | 2.54E-05 | 1.91E-04 |
| ZNF639 | 0.1876  | 2.79E-04 | 1.47E-03 |
| ZNF641 | -0.0293 | 5.74E-01 | 6.91E-01 |
| ZNF642 | 0.1388  | 7.40E-03 | 2.28E-02 |
| ZNF643 | 0.1190  | 2.19E-02 | 5.53E-02 |
| ZNF644 | 0.1499  | 3.81E-03 | 1.32E-02 |
| ZNF645 | 0.0762  | 1.43E-01 | 2.44E-01 |
| ZNF646 | 0.2221  | 1.58E-05 | 1.26E-04 |



|         |         |          |          |
|---------|---------|----------|----------|
| ZNF648  | -0.0772 | 1.38E-01 | 2.38E-01 |
| ZNF649  | 0.0888  | 8.77E-02 | 1.67E-01 |
| ZNF652  | 0.1476  | 4.37E-03 | 1.48E-02 |
| ZNF653  | -0.0191 | 7.13E-01 | 8.04E-01 |
| ZNF654  | -0.0147 | 7.78E-01 | 8.52E-01 |
| ZNF655  | -0.0983 | 5.86E-02 | 1.22E-01 |
| ZNF658  | 0.1885  | 2.61E-04 | 1.38E-03 |
| ZNF660  | 0.0569  | 2.75E-01 | 4.03E-01 |
| ZNF662  | 0.0214  | 6.81E-01 | 7.78E-01 |
| ZNF664  | 0.0616  | 2.37E-01 | 3.60E-01 |
| ZNF665  | 0.1339  | 9.84E-03 | 2.89E-02 |
| ZNF667  | 0.0965  | 6.35E-02 | 1.30E-01 |
| ZNF668  | 0.1792  | 5.24E-04 | 2.47E-03 |
| ZNF669  | 0.2159  | 2.74E-05 | 2.03E-04 |
| ZNF670  | 0.1233  | 1.75E-02 | 4.61E-02 |
| ZNF671  | 0.0071  | 8.91E-01 | 9.31E-01 |
| ZNF672  | 0.2241  | 1.32E-05 | 1.07E-04 |
| ZNF673  | 0.1442  | 5.38E-03 | 1.75E-02 |
| ZNF674  | 0.0692  | 1.83E-01 | 2.96E-01 |
| ZNF675  | 0.1739  | 7.70E-04 | 3.44E-03 |
| ZNF676  | 0.0298  | 5.67E-01 | 6.84E-01 |
| ZNF677  | 0.0202  | 6.98E-01 | 7.91E-01 |
| ZNF678  | 0.0946  | 6.89E-02 | 1.38E-01 |
| ZNF679  | 0.0055  | 9.16E-01 | 9.47E-01 |
| ZNF680  | -0.1097 | 3.47E-02 | 8.05E-02 |
| ZNF681  | 0.2074  | 5.67E-05 | 3.78E-04 |
| ZNF682  | 0.2071  | 5.82E-05 | 3.86E-04 |
| ZNF683  | -0.0559 | 2.83E-01 | 4.12E-01 |
| ZNF684  | -0.0671 | 1.97E-01 | 3.13E-01 |
| ZNF687  | 0.4874  | 1.57E-23 | 6.65E-21 |
| ZNF688  | -0.1215 | 1.92E-02 | 4.98E-02 |
| ZNF689  | -0.0074 | 8.87E-01 | 9.28E-01 |
| ZNF691  | 0.1939  | 1.71E-04 | 9.63E-04 |
| ZNF692  | 0.4229  | 1.57E-17 | 1.98E-15 |
| ZNF695  | 0.2869  | 1.85E-08 | 3.23E-07 |
| ZNF696  | 0.1605  | 1.93E-03 | 7.48E-03 |
| ZNF697  | 0.0108  | 8.35E-01 | 8.92E-01 |
| ZNF699  | -0.0476 | 3.61E-01 | 4.93E-01 |
| ZNF69   | -0.0069 | 8.95E-01 | 9.33E-01 |
| ZNF700  | 0.2803  | 4.01E-08 | 6.41E-07 |
| ZNF701  | 0.1533  | 3.07E-03 | 1.10E-02 |
| ZNF702P | 0.1183  | 2.26E-02 | 5.69E-02 |
| ZNF703  | -0.0419 | 4.21E-01 | 5.54E-01 |
| ZNF704  | -0.0442 | 3.96E-01 | 5.29E-01 |

|         |         |          |          |
|---------|---------|----------|----------|
| ZNF705A | 0.0280  | 5.91E-01 | 7.05E-01 |
| ZNF705D | -0.0480 | 3.56E-01 | 4.88E-01 |
| ZNF706  | 0.0355  | 4.96E-01 | 6.22E-01 |
| ZNF707  | 0.1843  | 3.59E-04 | 1.81E-03 |
| ZNF708  | 0.1613  | 1.83E-03 | 7.14E-03 |
| ZNF709  | 0.1011  | 5.16E-02 | 1.10E-01 |
| ZNF70   | 0.1387  | 7.46E-03 | 2.30E-02 |
| ZNF710  | 0.0094  | 8.57E-01 | 9.08E-01 |
| ZNF711  | 0.1941  | 1.69E-04 | 9.53E-04 |
| ZNF713  | 0.2060  | 6.39E-05 | 4.16E-04 |
| ZNF714  | 0.2038  | 7.70E-05 | 4.89E-04 |
| ZNF716  | 0.0345  | 5.07E-01 | 6.32E-01 |
| ZNF717  | -0.0491 | 3.46E-01 | 4.78E-01 |
| ZNF718  | 0.1906  | 2.22E-04 | 1.20E-03 |
| ZNF71   | 0.2414  | 2.54E-06 | 2.57E-05 |
| ZNF720  | -0.1074 | 3.87E-02 | 8.78E-02 |
| ZNF721  | 0.0336  | 5.19E-01 | 6.43E-01 |
| ZNF727  | 0.0901  | 8.29E-02 | 1.60E-01 |
| ZNF732  | 0.0967  | 6.27E-02 | 1.29E-01 |
| ZNF735  | -0.0250 | 6.32E-01 | 7.39E-01 |
| ZNF737  | 0.1134  | 2.89E-02 | 6.94E-02 |
| ZNF738  | 0.2907  | 1.17E-08 | 2.14E-07 |
| ZNF740  | 0.1446  | 5.27E-03 | 1.72E-02 |
| ZNF746  | 0.0762  | 1.43E-01 | 2.45E-01 |
| ZNF747  | -0.0840 | 1.06E-01 | 1.95E-01 |
| ZNF749  | 0.1364  | 8.51E-03 | 2.56E-02 |
| ZNF74   | 0.2671  | 1.77E-07 | 2.43E-06 |
| ZNF750  | -0.0383 | 4.62E-01 | 5.92E-01 |
| ZNF75A  | 0.2351  | 4.69E-06 | 4.40E-05 |
| ZNF75D  | 0.1071  | 3.92E-02 | 8.88E-02 |
| ZNF761  | 0.1411  | 6.47E-03 | 2.04E-02 |
| ZNF763  | 0.0034  | 9.48E-01 | 9.68E-01 |
| ZNF764  | 0.2724  | 9.82E-08 | 1.43E-06 |
| ZNF765  | 0.2448  | 1.82E-06 | 1.93E-05 |
| ZNF766  | 0.2421  | 2.37E-06 | 2.42E-05 |
| ZNF767  | 0.2451  | 1.77E-06 | 1.88E-05 |
| ZNF768  | 0.0696  | 1.81E-01 | 2.93E-01 |
| ZNF76   | 0.2144  | 3.12E-05 | 2.26E-04 |
| ZNF770  | -0.1581 | 2.26E-03 | 8.53E-03 |
| ZNF771  | 0.0310  | 5.51E-01 | 6.71E-01 |
| ZNF772  | 0.1354  | 9.03E-03 | 2.69E-02 |
| ZNF773  | 0.1290  | 1.29E-02 | 3.60E-02 |
| ZNF774  | 0.1046  | 4.41E-02 | 9.74E-02 |
| ZNF775  | 0.1807  | 4.70E-04 | 2.26E-03 |

|         |         |          |          |
|---------|---------|----------|----------|
| ZNF776  | -0.0209 | 6.88E-01 | 7.84E-01 |
| ZNF777  | -0.0166 | 7.50E-01 | 8.32E-01 |
| ZNF778  | -0.1839 | 3.69E-04 | 1.85E-03 |
| ZNF77   | 0.1465  | 4.70E-03 | 1.57E-02 |
| ZNF780A | 0.0243  | 6.41E-01 | 7.47E-01 |
| ZNF780B | 0.0747  | 1.51E-01 | 2.55E-01 |
| ZNF781  | 0.1598  | 2.02E-03 | 7.75E-03 |
| ZNF782  | 0.3497  | 4.12E-12 | 1.63E-10 |
| ZNF784  | -0.0120 | 8.18E-01 | 8.81E-01 |
| ZNF785  | 0.1230  | 1.77E-02 | 4.66E-02 |
| ZNF786  | 0.0303  | 5.61E-01 | 6.79E-01 |
| ZNF787  | 0.1191  | 2.18E-02 | 5.50E-02 |
| ZNF788  | 0.0355  | 4.96E-01 | 6.22E-01 |
| ZNF789  | 0.3682  | 2.35E-13 | 1.17E-11 |
| ZNF790  | -0.0909 | 8.03E-02 | 1.56E-01 |
| ZNF791  | -0.0331 | 5.25E-01 | 6.48E-01 |
| ZNF792  | 0.2585  | 4.47E-07 | 5.55E-06 |
| ZNF793  | 0.1955  | 1.51E-04 | 8.68E-04 |
| ZNF799  | -0.0123 | 8.13E-01 | 8.77E-01 |
| ZNF79   | 0.1260  | 1.52E-02 | 4.11E-02 |
| ZNF7    | 0.2304  | 7.33E-06 | 6.42E-05 |
| ZNF800  | -0.1165 | 2.48E-02 | 6.11E-02 |
| ZNF804A | 0.0173  | 7.40E-01 | 8.25E-01 |
| ZNF804B | -0.0746 | 1.52E-01 | 2.56E-01 |
| ZNF805  | 0.0700  | 1.79E-01 | 2.90E-01 |
| ZNF808  | 0.1359  | 8.77E-03 | 2.63E-02 |
| ZNF80   | 0.0326  | 5.31E-01 | 6.54E-01 |
| ZNF813  | 0.0576  | 2.68E-01 | 3.96E-01 |
| ZNF814  | 0.0960  | 6.48E-02 | 1.32E-01 |
| ZNF815  | 0.2414  | 2.56E-06 | 2.57E-05 |
| ZNF816A | 0.1487  | 4.10E-03 | 1.40E-02 |
| ZNF81   | 0.0486  | 3.50E-01 | 4.82E-01 |
| ZNF821  | 0.0766  | 1.41E-01 | 2.42E-01 |
| ZNF823  | 0.0132  | 7.99E-01 | 8.67E-01 |
| ZNF826  | 0.1383  | 7.65E-03 | 2.34E-02 |
| ZNF827  | -0.0609 | 2.42E-01 | 3.66E-01 |
| ZNF828  | 0.0916  | 7.80E-02 | 1.53E-01 |
| ZNF829  | 0.1577  | 2.32E-03 | 8.70E-03 |
| ZNF830  | 0.1737  | 7.77E-04 | 3.46E-03 |
| ZNF831  | -0.0775 | 1.36E-01 | 2.36E-01 |
| ZNF833  | 0.0794  | 1.27E-01 | 2.23E-01 |
| ZNF835  | -0.0066 | 8.99E-01 | 9.36E-01 |
| ZNF836  | 0.1693  | 1.06E-03 | 4.53E-03 |
| ZNF837  | -0.2082 | 5.30E-05 | 3.56E-04 |

|         |         |          |          |
|---------|---------|----------|----------|
| ZNF839  | 0.1164  | 2.49E-02 | 6.13E-02 |
| ZNF83   | 0.1841  | 3.66E-04 | 1.84E-03 |
| ZNF841  | 0.2958  | 6.26E-09 | 1.22E-07 |
| ZNF843  | -0.0618 | 2.35E-01 | 3.58E-01 |
| ZNF844  | 0.0490  | 3.47E-01 | 4.79E-01 |
| ZNF845  | 0.1023  | 4.90E-02 | 1.06E-01 |
| ZNF846  | -0.0591 | 2.56E-01 | 3.82E-01 |
| ZNF84   | 0.3277  | 9.78E-11 | 2.87E-09 |
| ZNF853  | -0.0240 | 6.45E-01 | 7.50E-01 |
| ZNF85   | 0.1857  | 3.23E-04 | 1.66E-03 |
| ZNF860  | 0.1283  | 1.34E-02 | 3.72E-02 |
| ZNF862  | 0.0702  | 1.77E-01 | 2.88E-01 |
| ZNF876P | 0.0941  | 7.03E-02 | 1.41E-01 |
| ZNF878  | 0.1819  | 4.30E-04 | 2.09E-03 |
| ZNF879  | 0.1826  | 4.07E-04 | 2.01E-03 |
| ZNF880  | 0.0880  | 9.05E-02 | 1.72E-01 |
| ZNF883  | 0.1790  | 5.33E-04 | 2.51E-03 |
| ZNF8    | 0.2781  | 5.12E-08 | 7.96E-07 |
| ZNF90   | 0.2212  | 1.70E-05 | 1.34E-04 |
| ZNF91   | 0.0345  | 5.08E-01 | 6.33E-01 |
| ZNF92   | 0.1251  | 1.59E-02 | 4.27E-02 |
| ZNF93   | 0.2723  | 9.91E-08 | 1.44E-06 |
| ZNF98   | 0.1146  | 2.73E-02 | 6.62E-02 |
| ZNF99   | 0.0064  | 9.02E-01 | 9.38E-01 |
| ZNFX1   | -0.0465 | 3.72E-01 | 5.05E-01 |
| ZNHIT1  | -0.2689 | 1.45E-07 | 2.04E-06 |
| ZNHIT2  | -0.0989 | 5.71E-02 | 1.19E-01 |
| ZNHIT3  | 0.3047  | 2.08E-09 | 4.59E-08 |
| ZNHIT6  | 0.1290  | 1.29E-02 | 3.60E-02 |
| ZNRD1   | 0.1705  | 9.77E-04 | 4.22E-03 |
| ZNRF1   | -0.1195 | 2.13E-02 | 5.41E-02 |
| ZNRF2   | -0.1318 | 1.11E-02 | 3.17E-02 |
| ZNRF3   | 0.0309  | 5.53E-01 | 6.73E-01 |
| ZNRF4   | -0.0654 | 2.09E-01 | 3.28E-01 |
| ZP1     | 0.1397  | 7.06E-03 | 2.19E-02 |
| ZP2     | -0.1190 | 2.19E-02 | 5.52E-02 |
| ZP3     | 0.2359  | 4.34E-06 | 4.12E-05 |
| ZPBP2   | 0.0023  | 9.65E-01 | 9.78E-01 |
| ZPBP    | -0.0218 | 6.76E-01 | 7.75E-01 |
| ZPLD1   | 0.1267  | 1.46E-02 | 3.98E-02 |
| ZRANB1  | -0.1690 | 1.08E-03 | 4.60E-03 |
| ZRANB2  | 0.1897  | 2.38E-04 | 1.28E-03 |
| ZRANB3  | 0.0160  | 7.58E-01 | 8.38E-01 |
| ZRSR2   | 0.1850  | 3.40E-04 | 1.73E-03 |

|           |         |          |          |
|-----------|---------|----------|----------|
| ZSCAN10   | 0.1091  | 3.58E-02 | 8.24E-02 |
| ZSCAN12P1 | 0.0953  | 6.68E-02 | 1.35E-01 |
| ZSCAN12   | 0.1611  | 1.86E-03 | 7.24E-03 |
| ZSCAN16   | 0.2822  | 3.20E-08 | 5.23E-07 |
| ZSCAN18   | 0.1274  | 1.41E-02 | 3.87E-02 |
| ZSCAN1    | 0.0370  | 4.77E-01 | 6.06E-01 |
| ZSCAN20   | 0.1464  | 4.72E-03 | 1.57E-02 |
| ZSCAN21   | -0.0448 | 3.89E-01 | 5.22E-01 |
| ZSCAN22   | 0.2338  | 5.31E-06 | 4.88E-05 |
| ZSCAN23   | 0.0144  | 7.82E-01 | 8.55E-01 |
| ZSCAN29   | 0.1166  | 2.47E-02 | 6.10E-02 |
| ZSCAN2    | 0.1235  | 1.73E-02 | 4.57E-02 |
| ZSCAN4    | 0.0159  | 7.61E-01 | 8.39E-01 |
| ZSCAN5A   | 0.0218  | 6.75E-01 | 7.74E-01 |
| ZSCAN5B   | 0.1215  | 1.92E-02 | 4.98E-02 |
| ZSWIM1    | 0.2436  | 2.06E-06 | 2.15E-05 |
| ZSWIM2    | -0.0125 | 8.11E-01 | 8.76E-01 |
| ZSWIM3    | 0.2116  | 3.98E-05 | 2.79E-04 |
| ZSWIM4    | 0.1476  | 4.39E-03 | 1.49E-02 |
| ZSWIM5    | 0.1508  | 3.59E-03 | 1.26E-02 |
| ZSWIM6    | -0.0052 | 9.20E-01 | 9.49E-01 |
| ZSWIM7    | -0.1049 | 4.35E-02 | 9.64E-02 |
| ZUFSP     | 0.2907  | 1.16E-08 | 2.13E-07 |
| ZW10      | 0.1861  | 3.13E-04 | 1.62E-03 |
| ZWILCH    | 0.2554  | 6.16E-07 | 7.34E-06 |
| ZWINT     | 0.4144  | 7.95E-17 | 8.25E-15 |
| ZXDA      | 0.0444  | 3.93E-01 | 5.26E-01 |
| ZXDB      | 0.0074  | 8.87E-01 | 9.28E-01 |
| ZXDC      | 0.2564  | 5.56E-07 | 6.70E-06 |
| ZYG11A    | 0.1527  | 3.18E-03 | 1.14E-02 |
| ZYG11B    | -0.1685 | 1.12E-03 | 4.76E-03 |
| ZYX       | 0.0368  | 4.80E-01 | 6.08E-01 |
| ZZEF1     | -0.0034 | 9.48E-01 | 9.68E-01 |
| ZZZ3      | 0.0713  | 1.71E-01 | 2.80E-01 |
| psiTPTE22 | -0.1972 | 1.32E-04 | 7.75E-04 |
| tAKR      | -0.2467 | 1.50E-06 | 1.62E-05 |
