# Supplementary material for: Prognostic potential of PRPF3 in hepatocellular carcinoma
Source: publisher site journal article supplement (doi:10.18632/aging.102665), 2020-01-11
Supplement: Supplementary file [file aging-v12i1-102665-supplementary-material-SD10.pdf]

**Supplementary Table 9. Correlation of PRPF3 with various immune signatures.**

| marker gene | Class     | None adjusted           |          | Tumor purity adjusted   |          |
|-------------|-----------|-------------------------|----------|-------------------------|----------|
|             |           | Correlation coefficient | P-value  | Correlation coefficient | P-value  |
| CCL2        | chemokine | -0.1523                 | 4.23E-03 | -0.0963                 | 7.27E-02 |
| CCL3        | chemokine | -0.0882                 | 9.88E-02 | -0.0191                 | 7.23E-01 |
| CCL4        | chemokine | -0.1020                 | 5.61E-02 | -0.0193                 | 7.19E-01 |
| CCL5        | chemokine | -0.1204                 | 2.41E-02 | -0.0480                 | 3.72E-01 |
| CCL7        | chemokine | -0.0840                 | 1.16E-01 | -0.0431                 | 4.23E-01 |
| CCL8        | chemokine | -0.0725                 | 1.75E-01 | -0.0247                 | 6.46E-01 |
| CCL11       | chemokine | -0.0550                 | 3.04E-01 | -0.0004                 | 9.93E-01 |
| CCL13       | chemokine | -0.0874                 | 1.02E-01 | -0.0202                 | 7.07E-01 |
| CCL14       | chemokine | -0.3149                 | 1.62E-09 | -0.3120                 | 2.70E-09 |
| CCL15       | chemokine | 0.0382                  | 4.76E-01 | 0.0090                  | 8.68E-01 |
| CCL16       | chemokine | -0.3167                 | 1.28E-09 | -0.3306                 | 2.55E-10 |
| CCL17       | chemokine | -0.0368                 | 4.92E-01 | 0.0327                  | 5.43E-01 |
| CCL18       | chemokine | -0.1415                 | 7.94E-03 | -0.0889                 | 9.77E-02 |
| CCL19       | chemokine | -0.0462                 | 3.89E-01 | 0.0090                  | 8.67E-01 |
| CCL20       | chemokine | 0.1877                  | 4.06E-04 | 0.2188                  | 3.84E-05 |
| CCL21       | chemokine | -0.0931                 | 8.15E-02 | -0.0494                 | 3.58E-01 |
| CCL22       | chemokine | -0.1249                 | 1.92E-02 | -0.0621                 | 2.48E-01 |
| CCL23       | chemokine | -0.1505                 | 4.72E-03 | -0.1071                 | 4.59E-02 |
| CCL24       | chemokine | -0.0808                 | 1.31E-01 | -0.0472                 | 3.80E-01 |
| CCL25       | chemokine | 0.1248                  | 1.93E-02 | 0.1203                  | 2.49E-02 |
| CCL26       | chemokine | 0.1730                  | 1.14E-03 | 0.2174                  | 4.33E-05 |
| CCL27       | chemokine | 0.1678                  | 1.61E-03 | 0.1777                  | 8.68E-04 |
| CCL28       | chemokine | 0.0723                  | 1.76E-01 | 0.0757                  | 1.59E-01 |
| CX3CL1      | chemokine | -0.2139                 | 5.35E-05 | -0.2003                 | 1.69E-04 |
| CXCL1       | chemokine | 0.0470                  | 3.80E-01 | 0.0979                  | 6.81E-02 |
| CXCL2       | chemokine | -0.1421                 | 7.65E-03 | -0.1147                 | 3.25E-02 |

|        |           |         |          |         |          |
|--------|-----------|---------|----------|---------|----------|
| CXCL3  | chemokine | 0.0707  | 1.86E-01 | 0.1257  | 1.89E-02 |
| CXCL5  | chemokine | 0.0640  | 2.32E-01 | 0.1099  | 4.04E-02 |
| CXCL6  | chemokine | -0.0638 | 2.33E-01 | -0.0230 | 6.69E-01 |
| CXCL9  | chemokine | -0.0535 | 3.18E-01 | 0.0093  | 8.63E-01 |
| CXCL10 | chemokine | -0.0535 | 3.18E-01 | -0.0027 | 9.61E-01 |
| CXCL11 | chemokine | -0.0706 | 1.87E-01 | -0.0185 | 7.31E-01 |
| CXCL12 | chemokine | -0.1784 | 7.84E-04 | -0.1356 | 1.13E-02 |
| CXCL13 | chemokine | 0.0582  | 2.77E-01 | 0.1186  | 2.69E-02 |
| CXCL14 | chemokine | -0.0705 | 1.88E-01 | -0.0287 | 5.93E-01 |
| CXCL16 | chemokine | 0.0088  | 8.69E-01 | 0.0330  | 5.39E-01 |
| CXCL17 | chemokine | 0.0627  | 2.41E-01 | 0.0810  | 1.31E-01 |
| XCL1   | chemokine | 0.0367  | 4.93E-01 | 0.0992  | 6.46E-02 |
| XCL2   | chemokine | -0.0189 | 7.24E-01 | 0.0503  | 3.50E-01 |
| CCR1   | receptor  | -0.1671 | 1.68E-03 | -0.0996 | 6.36E-02 |
| CCR2   | receptor  | -0.1156 | 3.03E-02 | -0.0454 | 3.99E-01 |
| CCR3   | receptor  | 0.0780  | 1.45E-01 | 0.1181  | 2.76E-02 |
| CCR4   | receptor  | -0.1389 | 9.19E-03 | -0.0907 | 9.13E-02 |
| CCR5   | receptor  | -0.0790 | 1.40E-01 | 0.0154  | 7.75E-01 |
| CCR6   | receptor  | 0.1354  | 1.11E-02 | 0.1725  | 1.23E-03 |
| CCR7   | receptor  | -0.0941 | 7.82E-02 | -0.0267 | 6.19E-01 |
| CCR8   | receptor  | -0.0200 | 7.08E-01 | 0.0438  | 4.15E-01 |
| CCR9   | receptor  | -0.0387 | 4.69E-01 | -0.0066 | 9.02E-01 |
| CCR10  | receptor  | 0.0607  | 2.57E-01 | 0.0900  | 9.38E-02 |
| CXCR1  | receptor  | -0.1047 | 5.00E-02 | -0.0748 | 1.64E-01 |
| CXCR2  | receptor  | -0.0767 | 1.51E-01 | -0.0334 | 5.34E-01 |
| CXCR3  | receptor  | -0.0428 | 4.24E-01 | 0.0471  | 3.81E-01 |
| CXCR4  | receptor  | -0.0025 | 9.62E-01 | 0.0912  | 8.95E-02 |
| CXCR5  | receptor  | 0.0022  | 9.67E-01 | 0.0718  | 1.82E-01 |
| CXCR6  | receptor  | -0.0798 | 1.36E-01 | 0.0047  | 9.30E-01 |

|          |                 |         |          |         |          |
|----------|-----------------|---------|----------|---------|----------|
| XCR1     | receptor        | -0.0976 | 6.78E-02 | -0.0446 | 4.05E-01 |
| CX3CR1   | receptor        | -0.1435 | 7.08E-03 | -0.1080 | 4.34E-02 |
| B2M      | MHC             | -0.2467 | 2.91E-06 | -0.2118 | 6.53E-05 |
| HLA-A    | MHC             | -0.0877 | 1.01E-01 | -0.0417 | 4.37E-01 |
| HLA-B    | MHC             | -0.1148 | 3.15E-02 | -0.0678 | 2.06E-01 |
| HLA-C    | MHC             | -0.1371 | 1.01E-02 | -0.1001 | 6.14E-02 |
| HLA-DMA  | MHC             | -0.0695 | 1.94E-01 | -0.0043 | 9.35E-01 |
| HLA-DMB  | MHC             | -0.0692 | 1.96E-01 | 0.0169  | 7.53E-01 |
| HLA-DOA  | MHC             | -0.1057 | 4.78E-02 | -0.0259 | 6.29E-01 |
| HLA-DOB  | MHC             | 0.0488  | 3.62E-01 | 0.1353  | 1.13E-02 |
| HLA-DPA1 | MHC             | -0.1399 | 8.66E-03 | -0.0697 | 1.93E-01 |
| HLA-DPB1 | MHC             | -0.1093 | 4.07E-02 | -0.0323 | 5.47E-01 |
| HLA-DQA1 | MHC             | -0.0808 | 1.31E-01 | -0.0047 | 9.30E-01 |
| HLA-DQA2 | MHC             | -0.0006 | 9.91E-01 | 0.0772  | 1.49E-01 |
| HLA-DQB1 | MHC             | -0.0946 | 7.67E-02 | -0.0230 | 6.67E-01 |
| HLA-DRA  | MHC             | -0.1168 | 2.87E-02 | -0.0461 | 3.90E-01 |
| HLA-DRB1 | MHC             | -0.1109 | 3.79E-02 | -0.0458 | 3.93E-01 |
| HLA-E    | MHC             | -0.2333 | 1.00E-05 | -0.1968 | 2.12E-04 |
| HLA-F    | MHC             | -0.0670 | 2.11E-01 | -0.0194 | 7.17E-01 |
| HLA-G    | MHC             | -0.0998 | 6.19E-02 | -0.0682 | 2.03E-01 |
| TAP1     | MHC             | 0.0890  | 9.58E-02 | 0.1562  | 3.38E-03 |
| TAP2     | MHC             | -0.0098 | 8.54E-01 | 0.0486  | 3.65E-01 |
| TAPBP    | MHC             | -0.0772 | 1.49E-01 | -0.0418 | 4.35E-01 |
| ADORA2A  | Immunoinhibitor | 0.1235  | 2.07E-02 | 0.1719  | 1.24E-03 |
| BTLA     | Immunoinhibitor | -0.0500 | 3.51E-01 | 0.0276  | 6.07E-01 |
| CD160    | Immunoinhibitor | 0.0574  | 2.84E-01 | 0.1050  | 4.96E-02 |
| CD244    | Immunoinhibitor | -0.1133 | 3.38E-02 | -0.0554 | 3.01E-01 |
| CD274    | Immunoinhibitor | -0.1401 | 8.57E-03 | -0.0897 | 9.40E-02 |
| CD96     | Immunoinhibitor | -0.1295 | 1.52E-02 | -0.0568 | 2.90E-01 |

|          |                  |         |          |         |          |
|----------|------------------|---------|----------|---------|----------|
| CSF1R    | Immunoinhibitor  | -0.1458 | 6.20E-03 | -0.0746 | 1.64E-01 |
| CTLA4    | Immunoinhibitor  | 0.0755  | 1.58E-01 | 0.1751  | 1.01E-03 |
| HAVCR2   | Immunoinhibitor  | -0.0969 | 6.99E-02 | -0.0108 | 8.40E-01 |
| IDO1     | Immunoinhibitor  | -0.0184 | 7.31E-01 | 0.0344  | 5.21E-01 |
| IL10     | Immunoinhibitor  | -0.1173 | 2.79E-02 | -0.0503 | 3.48E-01 |
| IL10RB   | Immunoinhibitor  | 0.0618  | 2.48E-01 | 0.0772  | 1.49E-01 |
| KDR      | Immunoinhibitor  | -0.2891 | 3.48E-08 | -0.2781 | 1.23E-07 |
| KIR2DL1  | Immunoinhibitor  | -0.0627 | 2.42E-01 | -0.0562 | 2.94E-01 |
| KIR2DL3  | Immunoinhibitor  | -0.0680 | 2.04E-01 | -0.0388 | 4.70E-01 |
| LAG3     | Immunoinhibitor  | 0.0527  | 3.24E-01 | 0.1163  | 2.96E-02 |
| LGALS9   | Immunoinhibitor  | -0.0109 | 8.39E-01 | 0.0772  | 1.49E-01 |
| PDCD1    | Immunoinhibitor  | 0.0514  | 3.37E-01 | 0.1319  | 1.35E-02 |
| PDCD1LG2 | Immunoinhibitor  | -0.1893 | 3.61E-04 | -0.1356 | 1.11E-02 |
| PVRL2    | Immunoinhibitor  | 0.0715  | 1.81E-01 | 0.0649  | 2.26E-01 |
| TGFB1    | Immunoinhibitor  | -0.0548 | 3.06E-01 | -0.0022 | 9.67E-01 |
| TGFBR1   | Immunoinhibitor  | 0.0739  | 1.67E-01 | 0.1164  | 2.95E-02 |
| TIGIT    | Immunoinhibitor  | -0.0336 | 5.30E-01 | 0.0568  | 2.89E-01 |
| VTCN1    | Immunoinhibitor  | 0.0275  | 6.08E-01 | 0.0659  | 2.18E-01 |
| C10orf54 | Immunostimulator | -0.1008 | 5.93E-02 | -0.0466 | 3.84E-01 |
| CD27     | Immunostimulator | -0.0050 | 9.26E-01 | 0.0874  | 1.03E-01 |
| CD276    | Immunostimulator | 0.1045  | 5.04E-02 | 0.1336  | 1.24E-02 |
| CD28     | Immunostimulator | -0.1067 | 4.59E-02 | -0.0379 | 4.80E-01 |
| CD40     | Immunostimulator | -0.1267 | 1.76E-02 | -0.0933 | 8.14E-02 |
| CD40LG   | Immunostimulator | -0.1460 | 6.13E-03 | -0.0879 | 1.01E-01 |
| CD48     | Immunostimulator | -0.1062 | 4.69E-02 | -0.0248 | 6.44E-01 |
| CD70     | Immunostimulator | -0.0018 | 9.74E-01 | 0.0865  | 1.06E-01 |
| CD80     | Immunostimulator | -0.0329 | 5.39E-01 | 0.0491  | 3.60E-01 |
| CD86     | Immunostimulator | -0.1016 | 5.73E-02 | -0.0127 | 8.12E-01 |
| CXCL12   | Immunostimulator | -0.1784 | 7.84E-04 | -0.1372 | 1.02E-02 |

|           |                  |         |          |         |          |
|-----------|------------------|---------|----------|---------|----------|
| CXCR4     | Immunostimulator | -0.0025 | 9.62E-01 | 0.0847  | 1.14E-01 |
| ENTPD1    | Immunostimulator | -0.0342 | 5.23E-01 | 0.0334  | 5.33E-01 |
| HHLA2     | Immunostimulator | 0.0811  | 1.29E-01 | 0.1092  | 4.12E-02 |
| ICOS      | Immunostimulator | 0.0203  | 7.05E-01 | 0.1211  | 2.35E-02 |
| ICOSLG    | Immunostimulator | -0.2541 | 1.41E-06 | -0.2452 | 3.46E-06 |
| IL2RA     | Immunostimulator | -0.0240 | 6.54E-01 | 0.0742  | 1.66E-01 |
| IL6       | Immunostimulator | -0.1381 | 9.58E-03 | -0.0852 | 1.12E-01 |
| IL6R      | Immunostimulator | 0.0118  | 8.26E-01 | -0.0076 | 8.88E-01 |
| KLRC1     | Immunostimulator | -0.0973 | 6.86E-02 | -0.0478 | 3.72E-01 |
| KLRK1     | Immunostimulator | -0.1338 | 1.21E-02 | -0.0723 | 1.77E-01 |
| LTA       | Immunostimulator | 0.0212  | 6.93E-01 | 0.1270  | 1.75E-02 |
| MICB      | Immunostimulator | 0.1305  | 1.44E-02 | 0.1769  | 8.90E-04 |
| NT5E      | Immunostimulator | -0.0227 | 6.72E-01 | -0.0163 | 7.61E-01 |
| PVR       | Immunostimulator | -0.0438 | 4.14E-01 | -0.0653 | 2.23E-01 |
| RAET1E    | Immunostimulator | 0.0041  | 9.39E-01 | 0.0232  | 6.65E-01 |
| TMEM173   | Immunostimulator | -0.1723 | 1.19E-03 | -0.1165 | 2.93E-02 |
| TMIGD2    | Immunostimulator | -0.1258 | 1.84E-02 | -0.0773 | 1.49E-01 |
| TNFRSF13B | Immunostimulator | 0.0333  | 5.34E-01 | 0.1043  | 5.12E-02 |
| TNFRSF13C | Immunostimulator | 0.1302  | 1.46E-02 | 0.1955  | 2.34E-04 |
| TNFRSF14  | Immunostimulator | -0.0725 | 1.76E-01 | -0.0385 | 4.73E-01 |
| TNFRSF17  | Immunostimulator | -0.0347 | 5.17E-01 | 0.0390  | 4.67E-01 |
| TNFRSF18  | Immunostimulator | 0.0829  | 1.21E-01 | 0.1717  | 1.26E-03 |
| TNFRSF25  | Immunostimulator | 0.1293  | 1.53E-02 | 0.1654  | 1.90E-03 |
| TNFRSF4   | Immunostimulator | 0.1376  | 9.87E-03 | 0.1928  | 2.84E-04 |
| TNFRSF8   | Immunostimulator | -0.0503 | 3.48E-01 | 0.0490  | 3.61E-01 |
| TNFRSF9   | Immunostimulator | 0.0102  | 8.49E-01 | 0.0685  | 2.01E-01 |
| TNFSF13   | Immunostimulator | -0.1781 | 8.01E-04 | -0.1350 | 1.15E-02 |
| TNFSF13B  | Immunostimulator | -0.0846 | 1.14E-01 | -0.0028 | 9.58E-01 |
| TNFSF14   | Immunostimulator | 0.0940  | 7.87E-02 | 0.1128  | 3.49E-02 |

|           |                      |         |          |         |          |
|-----------|----------------------|---------|----------|---------|----------|
| TNFSF15   | Immunostimulator     | 0.0261  | 6.25E-01 | 0.0663  | 2.16E-01 |
| TNFSF18   | Immunostimulator     | -0.0601 | 2.61E-01 | -0.0331 | 5.37E-01 |
| TNFSF4    | Immunostimulator     | 0.2993  | 1.07E-08 | 0.3064  | 4.84E-09 |
| TNFSF9    | Immunostimulator     | 0.1600  | 2.65E-03 | 0.2116  | 6.59E-05 |
| ULBP1     | Immunostimulator     | 0.1350  | 1.13E-02 | 0.1625  | 2.30E-03 |
| ADRM1     | Activated CD8 T cell | 0.0434  | 4.17E-01 | 0.0510  | 3.42E-01 |
| AHSA1     | Activated CD8 T cell | 0.0464  | 3.86E-01 | 0.0498  | 3.53E-01 |
| C1GALT1C1 | Activated CD8 T cell | -0.0042 | 9.38E-01 | 0.0134  | 8.03E-01 |
| CCT6B     | Activated CD8 T cell | -0.2883 | 3.82E-08 | -0.3117 | 2.53E-09 |
| CD37      | Activated CD8 T cell | -0.0824 | 1.23E-01 | 0.0095  | 8.60E-01 |
| CD3D      | Activated CD8 T cell | 0.0226  | 6.73E-01 | 0.1133  | 3.41E-02 |
| CD3E      | Activated CD8 T cell | -0.0931 | 8.14E-02 | -0.0112 | 8.35E-01 |
| CD3G      | Activated CD8 T cell | -0.0688 | 1.99E-01 | 0.0126  | 8.14E-01 |
| CD69      | Activated CD8 T cell | -0.1511 | 4.56E-03 | -0.0892 | 9.56E-02 |
| CD8A      | Activated CD8 T cell | -0.0993 | 6.32E-02 | -0.0288 | 5.91E-01 |
| CETN3     | Activated CD8 T cell | 0.0194  | 7.17E-01 | 0.0206  | 7.01E-01 |
| CSE1L     | Activated CD8 T cell | 0.2510  | 1.91E-06 | 0.2442  | 3.78E-06 |
| GEMIN6    | Activated CD8 T cell | 0.0557  | 2.98E-01 | 0.0379  | 4.80E-01 |
| GNLY      | Activated CD8 T cell | -0.0378 | 4.80E-01 | -0.0003 | 9.95E-01 |
| GPT2      | Activated CD8 T cell | -0.2661 | 4.22E-07 | -0.2872 | 4.52E-08 |
| GZMA      | Activated CD8 T cell | -0.1467 | 5.90E-03 | -0.0849 | 1.13E-01 |
| GZMH      | Activated CD8 T cell | -0.1656 | 1.85E-03 | -0.1192 | 2.57E-02 |
| GZMK      | Activated CD8 T cell | -0.1558 | 3.44E-03 | -0.0950 | 7.60E-02 |
| IL2RB     | Activated CD8 T cell | -0.1291 | 1.55E-02 | -0.0558 | 2.98E-01 |
| LCK       | Activated CD8 T cell | -0.0842 | 1.15E-01 | 0.0036  | 9.47E-01 |
| MPZL1     | Activated CD8 T cell | 0.3774  | 2.51E-13 | 0.4119  | 9.18E-16 |
| NKG7      | Activated CD8 T cell | -0.1198 | 2.47E-02 | -0.0651 | 2.25E-01 |
| PIK3IP1   | Activated CD8 T cell | -0.1298 | 1.49E-02 | -0.0972 | 6.93E-02 |
| PTRH2     | Activated CD8 T cell | 0.1665  | 1.74E-03 | 0.1594  | 2.78E-03 |

|           |                      |         |          |         |          |
|-----------|----------------------|---------|----------|---------|----------|
| TIMM13    | Activated CD8 T cell | -0.0588 | 2.72E-01 | -0.0703 | 1.89E-01 |
| ZAP70     | Activated CD8 T cell | -0.0428 | 4.24E-01 | 0.0398  | 4.58E-01 |
| ACTN4     | Central memory CD8 T | 0.0200  | 7.08E-01 | 0.0167  | 7.56E-01 |
| ADAM12    | Central memory CD8 T | 0.0836  | 1.18E-01 | 0.1524  | 4.27E-03 |
| ADCY9     | Central memory CD8 T | -0.1317 | 1.35E-02 | -0.1302 | 1.48E-02 |
| F13A1     | Central memory CD8 T | -0.1228 | 2.14E-02 | -0.0585 | 2.75E-01 |
| FCER1G    | Central memory CD8 T | -0.0687 | 1.99E-01 | 0.0184  | 7.31E-01 |
| FCGR3B    | Central memory CD8 T | -0.0510 | 3.41E-01 | -0.0127 | 8.12E-01 |
| FGF7      | Central memory CD8 T | -0.1948 | 2.41E-04 | -0.1586 | 2.93E-03 |
| FKBP4     | Central memory CD8 T | 0.0591  | 2.70E-01 | 0.0496  | 3.55E-01 |
| GLUD1     | Central memory CD8 T | -0.2082 | 8.53E-05 | -0.2291 | 1.51E-05 |
| GM2A      | Central memory CD8 T | 0.0466  | 3.84E-01 | 0.0829  | 1.22E-01 |
| GUSB      | Central memory CD8 T | -0.1621 | 2.31E-03 | -0.1644 | 2.03E-03 |
| IL1RN     | Central memory CD8 T | -0.0734 | 1.70E-01 | -0.0650 | 2.25E-01 |
| NOL11     | Central memory CD8 T | 0.4122  | 7.86E-16 | 0.3962  | 1.34E-14 |
| NTRK1     | Central memory CD8 T | 0.0389  | 4.68E-01 | 0.0925  | 8.39E-02 |
| RARA      | Central memory CD8 T | 0.1511  | 4.55E-03 | 0.1363  | 1.07E-02 |
| RNF128    | Central memory CD8 T | -0.1689 | 1.50E-03 | -0.1819 | 6.27E-04 |
| SIGLEC1   | Central memory CD8 T | -0.1521 | 4.30E-03 | -0.0874 | 1.02E-01 |
| TNFRSF11A | Central memory CD8 T | 0.0905  | 9.04E-02 | 0.1342  | 1.20E-02 |
| TOX4      | Central memory CD8 T | 0.1910  | 3.19E-04 | 0.1813  | 6.54E-04 |
| UBA52     | Central memory CD8 T | 0.0840  | 1.16E-01 | 0.0788  | 1.41E-01 |
| ULBP1     | Central memory CD8 T | 0.1350  | 1.13E-02 | 0.1625  | 2.30E-03 |
| ACAP1     | Effector memory CD8  | -0.0730 | 1.72E-01 | 0.0161  | 7.65E-01 |
| APOL3     | Effector memory CD8  | -0.0748 | 1.62E-01 | -0.0354 | 5.09E-01 |
| ARHGAP10  | Effector memory CD8  | -0.1793 | 7.40E-04 | -0.1390 | 9.23E-03 |
| ATP10D    | Effector memory CD8  | -0.0792 | 1.39E-01 | -0.0353 | 5.10E-01 |
| C3AR1     | Effector memory CD8  | -0.1005 | 6.00E-02 | -0.0140 | 7.94E-01 |
| CCR5      | Effector memory CD8  | -0.0790 | 1.40E-01 | 0.0165  | 7.58E-01 |

|          |                      |         |          |         |          |
|----------|----------------------|---------|----------|---------|----------|
| CD160    | Effector memory CD8  | 0.0574  | 2.84E-01 | 0.1050  | 4.96E-02 |
| CD55     | Effector memory CD8  | -0.0283 | 5.98E-01 | -0.0077 | 8.86E-01 |
| CFLAR    | Effector memory CD8  | -0.0568 | 2.88E-01 | -0.0246 | 6.47E-01 |
| CMKLR1   | Effector memory CD8  | -0.1315 | 1.37E-02 | -0.0594 | 2.68E-01 |
| DAPP1    | Effector memory CD8  | -0.0708 | 1.86E-01 | 0.0195  | 7.17E-01 |
| FCRL6    | Effector memory CD8  | -0.1781 | 8.03E-04 | -0.1349 | 1.15E-02 |
| FLT3LG   | Effector memory CD8  | -0.1174 | 2.78E-02 | -0.0720 | 1.79E-01 |
| GZMM     | Effector memory CD8  | -0.1083 | 4.27E-02 | -0.0452 | 3.99E-01 |
| HAPLN3   | Effector memory CD8  | 0.0078  | 8.84E-01 | 0.1115  | 3.71E-02 |
| HLA-DMB  | Effector memory CD8  | -0.0692 | 1.96E-01 | 0.0169  | 7.53E-01 |
| HLA-DPA1 | Effector memory CD8  | -0.1399 | 8.66E-03 | -0.0697 | 1.93E-01 |
| HLA-DPB1 | Effector memory CD8  | -0.1093 | 4.07E-02 | -0.0323 | 5.47E-01 |
| IFI16    | Effector memory CD8  | -0.0708 | 1.86E-01 | 0.0104  | 8.47E-01 |
| LIME1    | Effector memory CD8  | -0.1964 | 2.13E-04 | -0.2246 | 2.23E-05 |
| LTK      | Effector memory CD8  | -0.0224 | 6.76E-01 | 0.0132  | 8.06E-01 |
| NFKBIA   | Effector memory CD8  | -0.0905 | 9.06E-02 | -0.0776 | 1.47E-01 |
| SETD7    | Effector memory CD8  | -0.3218 | 6.73E-10 | -0.3210 | 7.84E-10 |
| SIK1     | Effector memory CD8  | -0.1384 | 9.44E-03 | -0.1501 | 4.89E-03 |
| TRIB2    | Effector memory CD8  | -0.0148 | 7.82E-01 | -0.0120 | 8.23E-01 |
| AIM2     | Activated CD4 T cell | 0.0519  | 3.32E-01 | 0.1657  | 1.86E-03 |
| BIRC3    | Activated CD4 T cell | 0.1174  | 2.78E-02 | 0.1768  | 8.95E-04 |
| BRIP1    | Activated CD4 T cell | 0.1941  | 2.54E-04 | 0.1915  | 3.13E-04 |
| CCL20    | Activated CD4 T cell | 0.1877  | 4.06E-04 | 0.2190  | 3.59E-05 |
| CCL4     | Activated CD4 T cell | -0.1020 | 5.61E-02 | -0.0259 | 6.29E-01 |
| CCL5     | Activated CD4 T cell | -0.1204 | 2.41E-02 | -0.0516 | 3.35E-01 |
| CCNB1    | Activated CD4 T cell | 0.3650  | 1.67E-12 | 0.3762  | 3.31E-13 |
| CCR7     | Activated CD4 T cell | -0.0941 | 7.82E-02 | -0.0267 | 6.19E-01 |
| DUSP2    | Activated CD4 T cell | -0.0274 | 6.08E-01 | 0.0430  | 4.23E-01 |
| ESCO2    | Activated CD4 T cell | 0.3049  | 5.53E-09 | 0.3218  | 7.13E-10 |



|         |                      |         |          |         |          |
|---------|----------------------|---------|----------|---------|----------|
| ETS1    | Activated CD4 T cell | -0.2332 | 1.02E-05 | -0.1945 | 2.52E-04 |
| EXO1    | Activated CD4 T cell | 0.4795  | 1.41E-21 | 0.4902  | 1.48E-22 |
| EXOC6   | Activated CD4 T cell | 0.2337  | 9.66E-06 | 0.2355  | 8.47E-06 |
| IARS    | Activated CD4 T cell | 0.2431  | 4.09E-06 | 0.2496  | 2.26E-06 |
| ITK     | Activated CD4 T cell | -0.1523 | 4.23E-03 | -0.0884 | 9.87E-02 |
| KIF11   | Activated CD4 T cell | 0.4089  | 1.39E-15 | 0.4189  | 2.64E-16 |
| KNTC1   | Activated CD4 T cell | 0.4255  | 7.19E-17 | 0.4308  | 3.02E-17 |
| NUF2    | Activated CD4 T cell | 0.5126  | 6.60E-25 | 0.5176  | 2.25E-25 |
| PRC1    | Activated CD4 T cell | 0.3915  | 2.66E-14 | 0.3994  | 7.75E-15 |
| PSAT1   | Activated CD4 T cell | -0.0417 | 4.37E-01 | -0.0360 | 5.02E-01 |
| RGS1    | Activated CD4 T cell | 0.0037  | 9.45E-01 | 0.0929  | 8.27E-02 |
| RTKN2   | Activated CD4 T cell | 0.3646  | 1.79E-12 | 0.3849  | 8.36E-14 |
| SAMSN1  | Activated CD4 T cell | -0.1064 | 4.64E-02 | -0.0189 | 7.25E-01 |
| SELL    | Activated CD4 T cell | -0.0732 | 1.71E-01 | -0.0034 | 9.50E-01 |
| TRAT1   | Activated CD4 T cell | -0.1266 | 1.77E-02 | -0.0603 | 2.60E-01 |
| ABHD3   | Central memory CD4 T | 0.1600  | 2.64E-03 | 0.1562  | 3.39E-03 |
| AHNAK   | Central memory CD4 T | -0.0653 | 2.22E-01 | -0.0558 | 2.98E-01 |
| ANXA2P2 | Central memory CD4 T | 0.0712  | 1.83E-01 | 0.1127  | 3.51E-02 |
| AQP3    | Central memory CD4 T | 0.0006  | 9.91E-01 | -0.0011 | 9.83E-01 |
| ATHL1   | Central memory CD4 T | 0.0010  | 9.85E-01 | 0.0034  | 9.49E-01 |
| BMI1    | Central memory CD4 T | -0.0071 | 8.94E-01 | -0.0159 | 7.68E-01 |
| BZW2    | Central memory CD4 T | 0.1441  | 6.85E-03 | 0.1497  | 5.00E-03 |
| CD63    | Central memory CD4 T | -0.0214 | 6.90E-01 | -0.0053 | 9.22E-01 |
| COL4A1  | Central memory CD4 T | -0.1194 | 2.53E-02 | -0.0864 | 1.06E-01 |
| CYLD    | Central memory CD4 T | -0.2229 | 2.50E-05 | -0.1922 | 2.98E-04 |
| ELMO2   | Central memory CD4 T | 0.0439  | 4.12E-01 | 0.0752  | 1.60E-01 |
| FYN     | Central memory CD4 T | -0.3358 | 1.06E-10 | -0.3103 | 3.00E-09 |
| GLIPR1  | Central memory CD4 T | -0.1144 | 3.21E-02 | -0.0411 | 4.44E-01 |
| GSS     | Central memory CD4 T | -0.1226 | 2.16E-02 | -0.1199 | 2.49E-02 |

|        |                          |         |          |         |          |
|--------|--------------------------|---------|----------|---------|----------|
| IFITM2 | Central memory CD4 T     | -0.2071 | 9.25E-05 | -0.1881 | 4.02E-04 |
| ITGB1  | Central memory CD4 T     | -0.0724 | 1.76E-01 | -0.0623 | 2.45E-01 |
| ITGB2  | Central memory CD4 T     | -0.1039 | 5.17E-02 | -0.0115 | 8.31E-01 |
| KLF5   | Central memory CD4 T     | 0.2133  | 5.63E-05 | 0.2116  | 6.59E-05 |
| LSP1   | Central memory CD4 T     | -0.0248 | 6.43E-01 | 0.0770  | 1.50E-01 |
| NDUFB9 | Central memory CD4 T     | -0.0172 | 7.48E-01 | -0.0287 | 5.92E-01 |
| PKM2   | Central memory CD4 T     | 0.2230  | 2.47E-05 | 0.2894  | 3.51E-08 |
| SFXN3  | Central memory CD4 T     | 0.0038  | 9.43E-01 | 0.0601  | 2.62E-01 |
| SIRPG  | Central memory CD4 T     | 0.0218  | 6.84E-01 | 0.1109  | 3.82E-02 |
| SMAD4  | Central memory CD4 T     | 0.0663  | 2.15E-01 | 0.0696  | 1.94E-01 |
| STX4   | Central memory CD4 T     | 0.1309  | 1.41E-02 | 0.1517  | 4.45E-03 |
| TRADD  | Central memory CD4 T     | -0.0821 | 1.25E-01 | -0.0665 | 2.14E-01 |
| VIM    | Central memory CD4 T     | -0.1284 | 1.61E-02 | -0.0702 | 1.90E-01 |
| XRCC6  | Central memory CD4 T     | 0.2489  | 2.36E-06 | 0.2521  | 1.79E-06 |
| ATM    | Effector memory CD4      | 0.0529  | 3.23E-01 | 0.0795  | 1.38E-01 |
| CASP3  | Effector memory CD4      | 0.0527  | 3.25E-01 | 0.0808  | 1.32E-01 |
| CASQ1  | Effector memory CD4      | 0.1262  | 1.80E-02 | 0.1484  | 5.40E-03 |
| CD300E | Effector memory CD4      | -0.1406 | 8.34E-03 | -0.0961 | 7.25E-02 |
| DARS   | Effector memory CD4      | 0.1210  | 2.34E-02 | 0.1221  | 2.24E-02 |
| DOCK9  | Effector memory CD4      | -0.0892 | 9.53E-02 | -0.0650 | 2.25E-01 |
| EXOSC9 | Effector memory CD4      | 0.1669  | 1.70E-03 | 0.1917  | 3.10E-04 |
| EZH2   | Effector memory CD4      | 0.4368  | 8.79E-18 | 0.4417  | 3.81E-18 |
| GDE1   | Effector memory CD4      | -0.2230 | 2.48E-05 | -0.1983 | 1.89E-04 |
| IL34   | cytokine and cytokine re | -0.0274 | 6.09E-01 | 0.0312  | 5.61E-01 |
| NCOA4  | Effector memory CD4      | -0.1985 | 1.82E-04 | -0.2168 | 4.30E-05 |
| NEFL   | Effector memory CD4      | -0.0344 | 5.21E-01 | 0.0019  | 9.72E-01 |
| PDGFRL | Effector memory CD4      | 0.1669  | 1.71E-03 | 0.1819  | 6.30E-04 |
| PTGS1  | Effector memory CD4      | -0.0081 | 8.80E-01 | 0.0799  | 1.36E-01 |
| REPS1  | Effector memory CD4      | 0.0577  | 2.81E-01 | 0.0762  | 1.55E-01 |

|          |                          |         |          |         |          |
|----------|--------------------------|---------|----------|---------|----------|
| SCG2     | Effector memory CD4      | 0.0347  | 5.17E-01 | 0.0879  | 1.01E-01 |
| SDPR     | Effector memory CD4      | -0.2143 | 5.18E-05 | -0.2094 | 7.92E-05 |
| SIGLEC14 | Effector memory CD4      | -0.1073 | 4.46E-02 | -0.0483 | 3.68E-01 |
| SIGLEC6  | Effector memory CD4      | -0.0304 | 5.70E-01 | 0.0198  | 7.12E-01 |
| TAL1     | Effector memory CD4      | -0.2188 | 3.56E-05 | -0.1936 | 2.69E-04 |
| TFEC     | Effector memory CD4      | -0.1046 | 5.02E-02 | -0.0173 | 7.48E-01 |
| TIPIN    | Effector memory CD4      | 0.3645  | 1.81E-12 | 0.3781  | 2.46E-13 |
| TPK1     | Effector memory CD4      | -0.2495 | 2.21E-06 | -0.2176 | 4.02E-05 |
| UQCRB    | Effector memory CD4      | -0.0336 | 5.31E-01 | -0.0461 | 3.90E-01 |
| USP9Y    | Effector memory CD4      | -0.0283 | 5.97E-01 | -0.0186 | 7.28E-01 |
| WIPF1    | Effector memory CD4      | -0.1186 | 2.62E-02 | -0.0413 | 4.41E-01 |
| ZCRB1    | Effector memory CD4      | 0.0872  | 1.03E-01 | 0.0883  | 9.90E-02 |
| B3GAT1   | T follicular helper cell | 0.0912  | 8.79E-02 | 0.0998  | 6.21E-02 |
| CDK5R1   | T follicular helper cell | 0.2532  | 1.55E-06 | 0.2533  | 1.58E-06 |
| PDCD1    | T follicular helper cell | 0.0514  | 3.37E-01 | 0.1319  | 1.35E-02 |
| BCL6     | T follicular helper cell | 0.0004  | 9.93E-01 | -0.0008 | 9.89E-01 |
| CD200    | T follicular helper cell | -0.0938 | 7.93E-02 | -0.0525 | 3.27E-01 |
| CD83     | T follicular helper cell | 0.0691  | 1.97E-01 | 0.1407  | 8.38E-03 |
| CD84     | T follicular helper cell | -0.1467 | 5.90E-03 | -0.0815 | 1.28E-01 |
| FGF2     | T follicular helper cell | -0.1023 | 5.55E-02 | -0.0863 | 1.07E-01 |
| GPR18    | T follicular helper cell | -0.0863 | 1.06E-01 | -0.0183 | 7.33E-01 |
| CEBPA    | T follicular helper cell | 0.1961  | 2.19E-04 | 0.1803  | 7.01E-04 |
| CECR1    | T follicular helper cell | -0.2006 | 1.55E-04 | -0.1500 | 4.92E-03 |
| CLEC10A  | T follicular helper cell | -0.0965 | 7.09E-02 | -0.0246 | 6.46E-01 |
| CLEC4A   | T follicular helper cell | -0.0447 | 4.03E-01 | 0.0452  | 3.99E-01 |
| CSF1R    | T follicular helper cell | -0.1458 | 6.20E-03 | -0.0746 | 1.64E-01 |
| CTSS     | T follicular helper cell | -0.0043 | 9.35E-01 | 0.0804  | 1.33E-01 |
| DPP4     | T follicular helper cell | -0.0804 | 1.33E-01 | -0.0955 | 7.45E-02 |
| LRRC32   | T follicular helper cell | -0.1808 | 6.65E-04 | -0.1479 | 5.56E-03 |

|          |                          |         |          |         |          |
|----------|--------------------------|---------|----------|---------|----------|
| MICA     | T follicular helper cell | 0.1629  | 2.21E-03 | 0.1522  | 4.33E-03 |
| NCAM1    | T follicular helper cell | -0.0309 | 5.64E-01 | 0.0147  | 7.85E-01 |
| NRP1     | T follicular helper cell | -0.1440 | 6.90E-03 | -0.1279 | 1.67E-02 |
| PDCD1LG2 | T follicular helper cell | -0.1893 | 3.61E-04 | -0.1356 | 1.11E-02 |
| PDCD6    | T follicular helper cell | 0.1226  | 2.16E-02 | 0.1209  | 2.37E-02 |
| PRDX1    | T follicular helper cell | 0.0685  | 2.00E-01 | 0.0967  | 7.07E-02 |
| RAE1     | T follicular helper cell | 0.3348  | 1.23E-10 | 0.3335  | 1.54E-10 |
| RAET1E   | T follicular helper cell | 0.0041  | 9.39E-01 | 0.0232  | 6.65E-01 |
| SIGLEC7  | T follicular helper cell | -0.1441 | 6.83E-03 | -0.0751 | 1.61E-01 |
| SIGLEC9  | T follicular helper cell | -0.1018 | 5.67E-02 | -0.0191 | 7.22E-01 |
| TYRO3    | T follicular helper cell | 0.2739  | 1.85E-07 | 0.2885  | 3.91E-08 |
| CHST12   | T follicular helper cell | 0.0716  | 1.81E-01 | 0.1111  | 3.77E-02 |
| CLIC3    | T follicular helper cell | 0.0285  | 5.94E-01 | 0.0903  | 9.17E-02 |
| IVNS1ABP | T follicular helper cell | 0.1678  | 1.60E-03 | 0.1798  | 7.25E-04 |
| LGMN     | T follicular helper cell | -0.1517 | 4.40E-03 | -0.0955 | 7.42E-02 |
| ACP5     | Gamma delta T cell       | -0.0262 | 6.25E-01 | 0.0196  | 7.15E-01 |
| AQP9     | Gamma delta T cell       | -0.2571 | 1.05E-06 | -0.2913 | 2.83E-08 |
| BTN3A2   | Gamma delta T cell       | -0.0810 | 1.30E-01 | -0.0303 | 5.72E-01 |
| C1orf54  | Gamma delta T cell       | -0.0024 | 9.64E-01 | 0.0715  | 1.82E-01 |
| CARD8    | Gamma delta T cell       | 0.0706  | 1.87E-01 | 0.0850  | 1.12E-01 |
| CCL18    | Gamma delta T cell       | -0.1415 | 7.94E-03 | -0.0926 | 8.37E-02 |
| CD209    | Gamma delta T cell       | -0.0979 | 6.69E-02 | -0.0369 | 4.91E-01 |
| CD33     | Gamma delta T cell       | -0.0918 | 8.61E-02 | -0.0054 | 9.20E-01 |
| CD36     | Gamma delta T cell       | -0.1361 | 1.07E-02 | -0.1349 | 1.15E-02 |
| CDK5     | Gamma delta T cell       | -0.1028 | 5.42E-02 | -0.1064 | 4.67E-02 |
| IL10RB   | Gamma delta T cell       | 0.0618  | 2.48E-01 | 0.0772  | 1.49E-01 |
| KLRF1    | Gamma delta T cell       | -0.1361 | 1.07E-02 | -0.1021 | 5.64E-02 |
| LGALS1   | Gamma delta T cell       | -0.0155 | 7.72E-01 | 0.0236  | 6.60E-01 |
| MAPK7    | Gamma delta T cell       | 0.2240  | 2.28E-05 | 0.2309  | 1.28E-05 |

|          |                      |         |          |         |          |
|----------|----------------------|---------|----------|---------|----------|
| KLHL7    | Gamma delta T cell   | 0.0690  | 1.97E-01 | 0.0545  | 3.10E-01 |
| KRT80    | Gamma delta T cell   | 0.1435  | 7.08E-03 | 0.1829  | 5.84E-04 |
| LAMC1    | Gamma delta T cell   | 0.2689  | 3.15E-07 | 0.2678  | 3.69E-07 |
| LCORL    | Gamma delta T cell   | -0.0095 | 8.59E-01 | -0.0009 | 9.86E-01 |
| LMNB1    | Gamma delta T cell   | 0.3572  | 5.28E-12 | 0.3751  | 3.91E-13 |
| MEIS3P1  | Gamma delta T cell   | -0.2197 | 3.29E-05 | -0.1872 | 4.32E-04 |
| MPL      | Gamma delta T cell   | -0.0983 | 6.59E-02 | -0.0926 | 8.35E-02 |
| FABP1    | Gamma delta T cell   | -0.2080 | 8.66E-05 | -0.1994 | 1.73E-04 |
| FABP5    | Gamma delta T cell   | 0.0812  | 1.29E-01 | 0.1460  | 6.22E-03 |
| FADD     | Gamma delta T cell   | 0.0364  | 4.96E-01 | 0.0500  | 3.51E-01 |
| MFAP3L   | Gamma delta T cell   | -0.2741 | 1.82E-07 | -0.2645 | 5.14E-07 |
| MINPP1   | Gamma delta T cell   | -0.1670 | 1.69E-03 | -0.1743 | 1.06E-03 |
| RPS24    | Gamma delta T cell   | 0.1326  | 1.29E-02 | 0.1239  | 2.04E-02 |
| RPS7     | Gamma delta T cell   | 0.1639  | 2.07E-03 | 0.1503  | 4.85E-03 |
| RPS9     | Gamma delta T cell   | 0.0715  | 1.82E-01 | 0.0711  | 1.84E-01 |
| DBNL     | Gamma delta T cell   | -0.0277 | 6.05E-01 | -0.0034 | 9.50E-01 |
| CCL13    | Gamma delta T cell   | -0.0874 | 1.02E-01 | -0.0245 | 6.47E-01 |
| CD70     | Type 1 T helper cell | -0.0018 | 9.74E-01 | 0.0865  | 1.06E-01 |
| TBX21    | Type 1 T helper cell | -0.1340 | 1.20E-02 | -0.0763 | 1.54E-01 |
| ADAM8    | Type 1 T helper cell | 0.0767  | 1.52E-01 | 0.1570  | 3.22E-03 |
| AHCYL2   | Type 1 T helper cell | -0.1757 | 9.46E-04 | -0.1862 | 4.64E-04 |
| ALCAM    | Type 1 T helper cell | -0.0376 | 4.83E-01 | -0.0501 | 3.50E-01 |
| B3GALNT1 | Type 1 T helper cell | 0.1609  | 2.50E-03 | 0.2106  | 7.20E-05 |
| BBS12    | Type 1 T helper cell | -0.0091 | 8.65E-01 | 0.0408  | 4.46E-01 |
| BST1     | Type 1 T helper cell | -0.0576 | 2.82E-01 | -0.0143 | 7.90E-01 |
| CD151    | Type 1 T helper cell | -0.0274 | 6.09E-01 | -0.0138 | 7.97E-01 |
| CD47     | Type 1 T helper cell | 0.0072  | 8.93E-01 | 0.0349  | 5.16E-01 |
| CD48     | Type 1 T helper cell | -0.1062 | 4.69E-02 | -0.0248 | 6.44E-01 |
| CD52     | Type 1 T helper cell | -0.0714 | 1.82E-01 | 0.0150  | 7.80E-01 |

|         |                      |         |          |         |          |
|---------|----------------------|---------|----------|---------|----------|
| CD53    | Type 1 T helper cell | -0.1088 | 4.16E-02 | -0.0165 | 7.58E-01 |
| CD59    | Type 1 T helper cell | -0.1626 | 2.24E-03 | -0.1370 | 1.03E-02 |
| CD6     | Type 1 T helper cell | -0.0676 | 2.06E-01 | 0.0202  | 7.07E-01 |
| CD68    | Type 1 T helper cell | -0.2191 | 3.47E-05 | -0.1764 | 9.18E-04 |
| CD7     | Type 1 T helper cell | 0.0490  | 3.60E-01 | 0.1352  | 1.13E-02 |
| CD96    | Type 1 T helper cell | -0.1295 | 1.52E-02 | -0.0568 | 2.90E-01 |
| CFHR3   | Type 1 T helper cell | -0.2526 | 1.64E-06 | -0.2429 | 4.29E-06 |
| CHRM3   | Type 1 T helper cell | 0.0240  | 6.54E-01 | 0.0402  | 4.54E-01 |
| CLEC7A  | Type 1 T helper cell | -0.0897 | 9.33E-02 | -0.0022 | 9.67E-01 |
| COL23A1 | Type 1 T helper cell | -0.0937 | 7.95E-02 | -0.0743 | 1.66E-01 |
| COL4A4  | Type 1 T helper cell | -0.1814 | 6.37E-04 | -0.1480 | 5.52E-03 |
| COL5A3  | Type 1 T helper cell | -0.1061 | 4.69E-02 | -0.1036 | 5.27E-02 |
| DAB1    | Type 1 T helper cell | -0.1010 | 5.87E-02 | -0.1142 | 3.27E-02 |
| DLEU7   | Type 1 T helper cell | 0.0748  | 1.62E-01 | 0.1073  | 4.48E-02 |
| DOC2B   | Type 1 T helper cell | 0.0097  | 8.56E-01 | 0.0330  | 5.38E-01 |
| EMP1    | Type 1 T helper cell | -0.2527 | 1.63E-06 | -0.2226 | 2.65E-05 |
| F12     | Type 1 T helper cell | -0.2317 | 1.16E-05 | -0.2325 | 1.11E-05 |
| FURIN   | Type 1 T helper cell | -0.0925 | 8.35E-02 | -0.0754 | 1.59E-01 |
| GAB3    | Type 1 T helper cell | -0.1285 | 1.60E-02 | -0.0538 | 3.15E-01 |
| GATM    | Type 1 T helper cell | -0.2524 | 1.68E-06 | -0.2653 | 4.77E-07 |
| GFPT2   | Type 1 T helper cell | -0.0245 | 6.48E-01 | 0.0301  | 5.74E-01 |
| GPR25   | Type 1 T helper cell | -0.0560 | 2.95E-01 | -0.0268 | 6.17E-01 |
| GREM2   | Type 1 T helper cell | -0.1656 | 1.85E-03 | -0.1798 | 7.28E-04 |
| HAVCR1  | Type 1 T helper cell | 0.0884  | 9.83E-02 | 0.1130  | 3.47E-02 |
| HSD11B1 | Type 1 T helper cell | -0.2476 | 2.66E-06 | -0.2541 | 1.46E-06 |
| HUNK    | Type 1 T helper cell | 0.2149  | 4.92E-05 | 0.2180  | 3.90E-05 |
| IGF2    | Type 1 T helper cell | 0.0164  | 7.60E-01 | 0.0021  | 9.68E-01 |
| RCSD1   | Type 1 T helper cell | -0.1344 | 1.17E-02 | -0.0660 | 2.18E-01 |
| RYR1    | Type 1 T helper cell | -0.0158 | 7.68E-01 | 0.0531  | 3.22E-01 |

|          |                      |         |          |         |          |
|----------|----------------------|---------|----------|---------|----------|
| SAV1     | Type 1 T helper cell | -0.2056 | 1.05E-04 | -0.1967 | 2.13E-04 |
| SELE     | Type 1 T helper cell | -0.2871 | 4.39E-08 | -0.2617 | 6.88E-07 |
| SELP     | Type 1 T helper cell | -0.2391 | 5.89E-06 | -0.2076 | 9.11E-05 |
| SH3KBP1  | Type 1 T helper cell | -0.1487 | 5.25E-03 | -0.1173 | 2.82E-02 |
| SIT1     | Type 1 T helper cell | -0.0112 | 8.34E-01 | 0.0910  | 8.92E-02 |
| SLC35B3  | Type 1 T helper cell | 0.0014  | 9.79E-01 | -0.0135 | 8.02E-01 |
| SIGLEC10 | Type 1 T helper cell | -0.0099 | 8.53E-01 | 0.0873  | 1.03E-01 |
| SKAP1    | Type 1 T helper cell | -0.1401 | 8.57E-03 | -0.1035 | 5.32E-02 |
| THUMPD2  | Type 1 T helper cell | 0.3504  | 1.41E-11 | 0.3418  | 4.99E-11 |
| TIGIT    | Type 1 T helper cell | -0.0336 | 5.30E-01 | 0.0568  | 2.89E-01 |
| ZEB2     | Type 1 T helper cell | -0.1821 | 6.08E-04 | -0.1297 | 1.52E-02 |
| ENC1     | Type 1 T helper cell | 0.0719  | 1.79E-01 | 0.0796  | 1.37E-01 |
| FAM134B  | Type 1 T helper cell | -0.2021 | 1.38E-04 | -0.1955 | 2.32E-04 |
| FBXO30   | Type 1 T helper cell | 0.1887  | 3.80E-04 | 0.2161  | 4.58E-05 |
| FCGR2C   | Type 1 T helper cell | -0.0734 | 1.70E-01 | -0.0081 | 8.79E-01 |
| STAC     | Type 1 T helper cell | -0.0319 | 5.51E-01 | 0.0184  | 7.32E-01 |
| LTC4S    | Type 1 T helper cell | -0.1724 | 1.18E-03 | -0.1375 | 9.99E-03 |
| MAN1B1   | Type 1 T helper cell | 0.1187  | 2.62E-02 | 0.1315  | 1.38E-02 |
| MDH1     | Type 1 T helper cell | -0.1539 | 3.86E-03 | -0.1575 | 3.13E-03 |
| MMD      | Type 1 T helper cell | 0.1977  | 1.94E-04 | 0.2294  | 1.46E-05 |
| RGS16    | Type 1 T helper cell | -0.0303 | 5.72E-01 | 0.0021  | 9.68E-01 |
| IL12A    | Type 1 T helper cell | 0.2515  | 1.82E-06 | 0.3056  | 5.29E-09 |
| P2RX5    | Type 1 T helper cell | 0.1311  | 1.40E-02 | 0.1770  | 8.79E-04 |
| CD97     | Type 1 T helper cell | 0.0326  | 5.43E-01 | 0.1045  | 5.08E-02 |
| ITGB4    | Type 1 T helper cell | 0.0743  | 1.65E-01 | 0.0980  | 6.72E-02 |
| ICAM3    | Type 1 T helper cell | -0.2445 | 3.57E-06 | -0.2264 | 1.90E-05 |
| METRNL   | Type 1 T helper cell | -0.0196 | 7.15E-01 | 0.0344  | 5.22E-01 |
| TNFRSF1A | Type 1 T helper cell | -0.1330 | 1.26E-02 | -0.1167 | 2.90E-02 |
| IRF1     | Type 1 T helper cell | 0.0257  | 6.31E-01 | 0.1074  | 4.47E-02 |

|          |                       |         |          |         |          |
|----------|-----------------------|---------|----------|---------|----------|
| HTR2B    | Type 1 T helper cell  | -0.2965 | 1.50E-08 | -0.2732 | 2.09E-07 |
| CALD1    | Type 1 T helper cell  | -0.3581 | 4.62E-12 | -0.3488 | 1.90E-11 |
| MOCOS    | Type 1 T helper cell  | -0.2132 | 5.68E-05 | -0.2089 | 8.25E-05 |
| TRAF3IP2 | Type 1 T helper cell  | -0.0064 | 9.04E-01 | 0.0082  | 8.78E-01 |
| TLR8     | Type 1 T helper cell  | -0.1118 | 3.63E-02 | -0.0328 | 5.41E-01 |
| TRAF1    | Type 1 T helper cell  | 0.0998  | 6.17E-02 | 0.1577  | 3.09E-03 |
| DUSP14   | Type 1 T helper cell  | -0.0250 | 6.41E-01 | -0.0002 | 9.98E-01 |
| IL17RA   | Type 17 T helper cell | -0.0121 | 8.21E-01 | 0.0106  | 8.43E-01 |
| C2CD4A   | Type 17 T helper cell | -0.0536 | 3.17E-01 | -0.0265 | 6.21E-01 |
| C2CD4B   | Type 17 T helper cell | -0.1332 | 1.25E-02 | -0.1054 | 4.87E-02 |
| CA2      | Type 17 T helper cell | -0.2169 | 4.15E-05 | -0.2174 | 4.11E-05 |
| CCDC65   | Type 17 T helper cell | 0.0720  | 1.78E-01 | 0.0993  | 6.34E-02 |
| CEACAM3  | Type 17 T helper cell | 0.0065  | 9.03E-01 | 0.0590  | 2.71E-01 |
| IL17C    | Type 17 T helper cell | 0.0363  | 4.98E-01 | 0.0498  | 3.53E-01 |
| IL17RC   | Type 17 T helper cell | -0.1943 | 2.51E-04 | -0.1941 | 2.59E-04 |
| IL17RE   | Type 17 T helper cell | 0.1561  | 3.37E-03 | 0.1390  | 9.20E-03 |
| IL23A    | Type 17 T helper cell | -0.0577 | 2.81E-01 | -0.0275 | 6.08E-01 |
| ILDR1    | Type 17 T helper cell | 0.1737  | 1.09E-03 | 0.1919  | 3.06E-04 |
| LONRF3   | Type 17 T helper cell | -0.0556 | 2.99E-01 | -0.0575 | 2.84E-01 |
| SH2D6    | Type 17 T helper cell | 0.0443  | 4.08E-01 | 0.0555  | 3.01E-01 |
| TNIP2    | Type 17 T helper cell | -0.0016 | 9.76E-01 | 0.0137  | 7.98E-01 |
| ABCA1    | Type 17 T helper cell | -0.0178 | 7.39E-01 | -0.0040 | 9.40E-01 |
| ABCB1    | Type 17 T helper cell | -0.3005 | 9.27E-09 | -0.3009 | 9.30E-09 |
| ADAMTS12 | Type 17 T helper cell | -0.1375 | 9.92E-03 | -0.0971 | 6.95E-02 |
| ANK1     | Type 17 T helper cell | -0.0200 | 7.09E-01 | 0.0436  | 4.16E-01 |
| ANKRD22  | Type 17 T helper cell | 0.0330  | 5.38E-01 | 0.1030  | 5.43E-02 |
| B3GALT2  | Type 17 T helper cell | -0.1122 | 3.56E-02 | -0.0660 | 2.18E-01 |
| CAMTA1   | Type 17 T helper cell | -0.0925 | 8.34E-02 | -0.1017 | 5.73E-02 |
| CCR9     | Type 17 T helper cell | -0.0387 | 4.69E-01 | -0.0049 | 9.27E-01 |



|         |                       |         |          |         |          |
|---------|-----------------------|---------|----------|---------|----------|
| CD40    | Type 17 T helper cell | -0.1267 | 1.76E-02 | -0.0933 | 8.14E-02 |
| GPR44   | Type 17 T helper cell | 0.0385  | 4.72E-01 | 0.0259  | 6.29E-01 |
| IFT80   | Type 17 T helper cell | 0.1933  | 2.70E-04 | 0.2149  | 5.05E-05 |
| ASB2    | Type 2 T helper cell  | -0.0257 | 6.32E-01 | 0.0636  | 2.35E-01 |
| CSRP2   | Type 2 T helper cell  | -0.0217 | 6.85E-01 | -0.0112 | 8.35E-01 |
| DAPK1   | Type 2 T helper cell  | 0.0326  | 5.43E-01 | 0.0324  | 5.46E-01 |
| DLC1    | Type 2 T helper cell  | -0.2257 | 1.97E-05 | -0.2253 | 2.10E-05 |
| DNAJC12 | Type 2 T helper cell  | -0.0795 | 1.37E-01 | -0.0818 | 1.27E-01 |
| DUSP6   | Type 2 T helper cell  | -0.1679 | 1.60E-03 | -0.1473 | 5.75E-03 |
| GNAI1   | Type 2 T helper cell  | -0.0268 | 6.17E-01 | -0.0504 | 3.48E-01 |
| LAMP3   | Type 2 T helper cell  | 0.1309  | 1.42E-02 | 0.1855  | 4.85E-04 |
| NRP2    | Type 2 T helper cell  | -0.2349 | 8.66E-06 | -0.1981 | 1.92E-04 |
| OSBPL1A | Type 2 T helper cell  | -0.1650 | 1.93E-03 | -0.1464 | 6.06E-03 |
| PDE4B   | Type 2 T helper cell  | -0.1400 | 8.61E-03 | -0.0886 | 9.79E-02 |
| PHLDA1  | Type 2 T helper cell  | -0.2380 | 6.55E-06 | -0.2253 | 2.09E-05 |
| PLA2G4A | Type 2 T helper cell  | -0.1100 | 3.94E-02 | -0.0368 | 4.93E-01 |
| RAB27B  | Type 2 T helper cell  | -0.0193 | 7.19E-01 | 0.0098  | 8.55E-01 |
| RBMS3   | Type 2 T helper cell  | -0.1895 | 3.58E-04 | -0.1568 | 3.28E-03 |
| RNF125  | Type 2 T helper cell  | -0.3492 | 1.66E-11 | -0.3395 | 6.86E-11 |
| TMPRSS3 | Type 2 T helper cell  | 0.2176  | 3.92E-05 | 0.2582  | 9.75E-07 |
| GATA3   | Type 2 T helper cell  | -0.1091 | 4.11E-02 | -0.0367 | 4.94E-01 |
| BIRC5   | Type 2 T helper cell  | 0.4282  | 4.43E-17 | 0.4360  | 1.13E-17 |
| CDC25C  | Type 2 T helper cell  | 0.3943  | 1.66E-14 | 0.4036  | 3.80E-15 |
| CDC7    | Type 2 T helper cell  | 0.3435  | 3.70E-11 | 0.3840  | 9.60E-14 |
| CENPF   | Type 2 T helper cell  | 0.4502  | 6.38E-19 | 0.4536  | 3.64E-19 |
| CXCR6   | Type 2 T helper cell  | -0.0798 | 1.36E-01 | 0.0037  | 9.45E-01 |
| DHFR    | Type 2 T helper cell  | 0.0688  | 1.98E-01 | 0.0597  | 2.65E-01 |
| EVI5    | Type 2 T helper cell  | -0.1170 | 2.84E-02 | -0.0982 | 6.65E-02 |
| GSTA4   | Type 2 T helper cell  | 0.1699  | 1.40E-03 | 0.1581  | 3.02E-03 |

|         |                      |         |          |         |          |
|---------|----------------------|---------|----------|---------|----------|
| HELLS   | Type 2 T helper cell | 0.3926  | 2.21E-14 | 0.4088  | 1.58E-15 |
| IL26    | Type 2 T helper cell | 0.0385  | 4.72E-01 | 0.0829  | 1.21E-01 |
| LAIR2   | Type 2 T helper cell | 0.1020  | 5.63E-02 | 0.1566  | 3.32E-03 |
| CCL3L1  | Regulatory T cell    | 0.0686  | 2.00E-01 | 0.1156  | 3.06E-02 |
| CD72    | Regulatory T cell    | -0.0927 | 8.28E-02 | -0.0216 | 6.87E-01 |
| CLEC5A  | Regulatory T cell    | 0.0246  | 6.46E-01 | 0.0956  | 7.41E-02 |
| FOXP3   | Regulatory T cell    | -0.1162 | 2.96E-02 | -0.0696 | 1.94E-01 |
| ITGA4   | Regulatory T cell    | -0.0999 | 6.15E-02 | -0.0279 | 6.04E-01 |
| L1CAM   | Regulatory T cell    | -0.0303 | 5.71E-01 | 0.0264  | 6.22E-01 |
| LIPA    | Regulatory T cell    | -0.2191 | 3.46E-05 | -0.1901 | 3.48E-04 |
| LRP1    | Regulatory T cell    | -0.2941 | 1.96E-08 | -0.2817 | 8.34E-08 |
| LRRC42  | Regulatory T cell    | 0.2462  | 3.05E-06 | 0.2652  | 4.80E-07 |
| MARCO   | Regulatory T cell    | -0.1679 | 1.59E-03 | -0.1209 | 2.37E-02 |
| MMP12   | Regulatory T cell    | 0.0677  | 2.06E-01 | 0.1349  | 1.15E-02 |
| MNDA    | Regulatory T cell    | -0.0487 | 3.63E-01 | 0.0504  | 3.47E-01 |
| MRC1    | Regulatory T cell    | -0.2220 | 2.70E-05 | -0.1825 | 6.00E-04 |
| MS4A6A  | Regulatory T cell    | -0.1529 | 4.08E-03 | -0.0856 | 1.10E-01 |
| PELO    | Regulatory T cell    | 0.0672  | 2.09E-01 | 0.0980  | 6.71E-02 |
| PLEK    | Regulatory T cell    | -0.0666 | 2.13E-01 | 0.0275  | 6.08E-01 |
| PRSS23  | Regulatory T cell    | -0.0529 | 3.23E-01 | 0.0028  | 9.59E-01 |
| PTGIR   | Regulatory T cell    | -0.1101 | 3.92E-02 | -0.0619 | 2.48E-01 |
| ST8SIA4 | Regulatory T cell    | -0.0614 | 2.51E-01 | 0.0279  | 6.03E-01 |
| STAB1   | Regulatory T cell    | -0.0976 | 6.79E-02 | -0.0282 | 5.99E-01 |
| ADAM28  | Activated B cell     | -0.0065 | 9.04E-01 | 0.0888  | 9.72E-02 |
| CD180   | Activated B cell     | -0.0938 | 7.93E-02 | -0.0130 | 8.08E-01 |
| CD79B   | Activated B cell     | -0.0228 | 6.70E-01 | 0.0400  | 4.56E-01 |
| BLK     | Activated B cell     | -0.0573 | 2.84E-01 | -0.0158 | 7.69E-01 |
| CD19    | Activated B cell     | 0.0837  | 1.18E-01 | 0.1519  | 4.40E-03 |
| MS4A1   | Activated B cell     | -0.0295 | 5.81E-01 | 0.0330  | 5.38E-01 |

|          |                  |         |          |         |          |
|----------|------------------|---------|----------|---------|----------|
| TNFRSF17 | Activated B cell | -0.0347 | 5.17E-01 | 0.0390  | 4.67E-01 |
| GNG7     | Activated B cell | -0.1215 | 2.28E-02 | -0.1390 | 9.24E-03 |
| MICAL3   | Activated B cell | -0.0785 | 1.42E-01 | -0.0960 | 7.27E-02 |
| SPIB     | Activated B cell | 0.1598  | 2.67E-03 | 0.2453  | 3.41E-06 |
| HLA-DOB  | Activated B cell | 0.0488  | 3.62E-01 | 0.1353  | 1.13E-02 |
| PNOC     | Activated B cell | 0.0237  | 6.58E-01 | 0.1046  | 5.05E-02 |
| FCRL2    | Activated B cell | -0.0006 | 9.90E-01 | 0.0569  | 2.89E-01 |
| BACH2    | Activated B cell | -0.0896 | 9.37E-02 | -0.0616 | 2.51E-01 |
| CR2      | Activated B cell | 0.0959  | 7.29E-02 | 0.1540  | 3.88E-03 |
| TCL1A    | Activated B cell | -0.0173 | 7.47E-01 | 0.0380  | 4.79E-01 |
| AKNA     | Activated B cell | -0.0061 | 9.10E-01 | 0.0748  | 1.62E-01 |
| ARHGAP25 | Activated B cell | -0.1409 | 8.19E-03 | -0.0712 | 1.84E-01 |
| CCL21    | Activated B cell | -0.0931 | 8.15E-02 | -0.0508 | 3.44E-01 |
| CD27     | Activated B cell | -0.0050 | 9.26E-01 | 0.0874  | 1.03E-01 |
| CD38     | Activated B cell | -0.0243 | 6.50E-01 | 0.0585  | 2.75E-01 |
| CLEC17A  | Activated B cell | 0.0298  | 5.78E-01 | 0.0805  | 1.33E-01 |
| CLEC9A   | Activated B cell | -0.1617 | 2.37E-03 | -0.1168 | 2.89E-02 |
| CLECL1   | Activated B cell | 0.0804  | 1.33E-01 | 0.1805  | 6.90E-04 |
| CD22     | Immature B cell  | 0.0049  | 9.27E-01 | 0.0603  | 2.61E-01 |
| CYBB     | Immature B cell  | -0.0917 | 8.61E-02 | -0.0033 | 9.51E-01 |
| FAM129C  | Immature B cell  | -0.0009 | 9.86E-01 | 0.0412  | 4.42E-01 |
| FCRL1    | Immature B cell  | 0.0122  | 8.20E-01 | 0.0592  | 2.69E-01 |
| FCRL3    | Immature B cell  | 0.0050  | 9.26E-01 | 0.0697  | 1.93E-01 |
| FCRL5    | Immature B cell  | -0.0174 | 7.45E-01 | 0.0582  | 2.78E-01 |
| FCRLA    | Immature B cell  | 0.0283  | 5.98E-01 | 0.0911  | 8.86E-02 |
| HDAC9    | Immature B cell  | -0.0778 | 1.46E-01 | -0.0053 | 9.21E-01 |
| HLA-DQA1 | Immature B cell  | -0.0808 | 1.31E-01 | -0.0047 | 9.30E-01 |
| HVCN1    | Immature B cell  | -0.1183 | 2.67E-02 | -0.0467 | 3.84E-01 |
| KIAA0226 | Immature B cell  | 0.2169  | 4.18E-05 | 0.2564  | 1.17E-06 |

|        |                     |         |          |         |          |
|--------|---------------------|---------|----------|---------|----------|
| NCF1   | Immature B cell     | -0.0440 | 4.11E-01 | 0.0565  | 2.92E-01 |
| NCF1B  | Immature B cell     | -0.0289 | 5.90E-01 | 0.0655  | 2.22E-01 |
| P2RY10 | Immature B cell     | -0.0860 | 1.08E-01 | -0.0125 | 8.16E-01 |
| SP100  | Immature B cell     | -0.2514 | 1.84E-06 | -0.2255 | 2.05E-05 |
| TXNIP  | Immature B cell     | -0.0964 | 7.12E-02 | -0.0695 | 1.95E-01 |
| STAP1  | Immature B cell     | -0.0158 | 7.68E-01 | 0.0451  | 4.00E-01 |
| TAGAP  | Immature B cell     | -0.1191 | 2.56E-02 | -0.0443 | 4.09E-01 |
| ZCCHC2 | Immature B cell     | 0.0341  | 5.24E-01 | 0.0439  | 4.13E-01 |
| AICDA  | Memory B cell       | 0.0325  | 5.44E-01 | 0.0795  | 1.38E-01 |
| CCNA2  | Memory B cell       | 0.3181  | 1.08E-09 | 0.3340  | 1.45E-10 |
| CDKN3  | Memory B cell       | 0.3838  | 9.23E-14 | 0.3901  | 3.60E-14 |
| CLCN5  | Memory B cell       | -0.0732 | 1.71E-01 | -0.0911 | 8.88E-02 |
| ENPP1  | Memory B cell       | -0.0555 | 2.99E-01 | -0.0778 | 1.46E-01 |
| FCER1A | Memory B cell       | -0.0852 | 1.11E-01 | -0.0473 | 3.78E-01 |
| MYC    | Memory B cell       | -0.0345 | 5.20E-01 | -0.0229 | 6.70E-01 |
| RUNX2  | Memory B cell       | -0.0722 | 1.77E-01 | -0.0008 | 9.88E-01 |
| SORL1  | Memory B cell       | -0.2278 | 1.63E-05 | -0.2207 | 3.10E-05 |
| SOX5   | Memory B cell       | -0.1269 | 1.74E-02 | -0.1291 | 1.57E-02 |
| STAT5A | Memory B cell       | -0.0783 | 1.43E-01 | -0.0251 | 6.40E-01 |
| STAT5B | Memory B cell       | -0.0517 | 3.35E-01 | -0.0673 | 2.09E-01 |
| TLR9   | Memory B cell       | 0.1557  | 3.46E-03 | 0.2191  | 3.57E-05 |
| AKT3   | Natural killer cell | -0.0904 | 9.08E-02 | -0.0522 | 3.30E-01 |
| AXL    | Natural killer cell | -0.1324 | 1.31E-02 | -0.0706 | 1.88E-01 |
| BST2   | Natural killer cell | -0.1506 | 4.69E-03 | -0.1296 | 1.52E-02 |
| CDH2   | Natural killer cell | -0.0429 | 4.23E-01 | -0.0498 | 3.53E-01 |
| CRTAM  | Natural killer cell | -0.0648 | 2.26E-01 | 0.0138  | 7.97E-01 |
| CSF2RA | Natural killer cell | -0.0144 | 7.88E-01 | 0.0631  | 2.39E-01 |
| CTSZ   | Natural killer cell | -0.1659 | 1.81E-03 | -0.1415 | 8.00E-03 |
| CXCL1  | Natural killer cell | 0.0470  | 3.80E-01 | 0.0949  | 7.62E-02 |

|          |                           |         |          |         |          |
|----------|---------------------------|---------|----------|---------|----------|
| CYTH1    | Natural killer cell       | 0.1029  | 5.41E-02 | 0.1040  | 5.19E-02 |
| DAXX     | Natural killer cell       | 0.2419  | 4.56E-06 | 0.2459  | 3.24E-06 |
| DGKH     | Natural killer cell       | 0.0362  | 4.99E-01 | 0.0234  | 6.62E-01 |
| DLL4     | Natural killer cell       | -0.0373 | 4.86E-01 | -0.0246 | 6.46E-01 |
| DPYD     | Natural killer cell       | -0.1223 | 2.19E-02 | -0.1065 | 4.64E-02 |
| ERBB3    | Natural killer cell       | 0.2169  | 4.18E-05 | 0.1920  | 3.03E-04 |
| F11R     | Natural killer cell       | 0.1307  | 1.43E-02 | 0.1171  | 2.85E-02 |
| FAM27A   | Natural killer cell       | 0.1241  | 2.00E-02 | 0.1655  | 1.89E-03 |
| FAM49A   | Natural killer cell       | -0.0824 | 1.24E-01 | -0.0372 | 4.88E-01 |
| FASLG    | Natural killer cell       | -0.0697 | 1.93E-01 | 0.0003  | 9.95E-01 |
| FCGR1A   | Natural killer cell       | -0.0432 | 4.20E-01 | 0.0529  | 3.23E-01 |
| FN1      | Natural killer cell       | -0.0944 | 7.73E-02 | -0.0796 | 1.37E-01 |
| FSTL1    | Natural killer cell       | -0.1634 | 2.14E-03 | -0.1238 | 2.05E-02 |
| FUCA1    | Natural killer cell       | -0.3162 | 1.37E-09 | -0.3009 | 9.35E-09 |
| GBP3     | Natural killer cell       | -0.1478 | 5.53E-03 | -0.1112 | 3.76E-02 |
| GLS2     | Natural killer cell       | -0.1984 | 1.83E-04 | -0.1956 | 2.32E-04 |
| GRB2     | Natural killer cell       | 0.1967  | 2.09E-04 | 0.2178  | 3.97E-05 |
| LST1     | Natural killer cell       | -0.0969 | 6.99E-02 | -0.0245 | 6.48E-01 |
| BCL2     | Natural killer cell       | -0.1633 | 2.14E-03 | -0.1152 | 3.12E-02 |
| CDC5L    | Natural killer cell       | 0.0868  | 1.05E-01 | 0.0730  | 1.73E-01 |
| FGF18    | Natural killer cell       | -0.1455 | 6.31E-03 | -0.1213 | 2.33E-02 |
| FUT5     | Natural killer cell       | -0.1268 | 1.75E-02 | -0.1157 | 3.05E-02 |
| FZR1     | Natural killer cell       | -0.0074 | 8.91E-01 | -0.0138 | 7.97E-01 |
| IGFBP5   | Natural killer cell       | -0.1836 | 5.45E-04 | -0.1570 | 3.24E-03 |
| KANK2    | Natural killer cell       | -0.0323 | 5.46E-01 | -0.0443 | 4.09E-01 |
| LDB3     | Natural killer cell       | -0.0797 | 1.36E-01 | -0.0584 | 2.76E-01 |
| ABAT     | CD56bright natural killer | -0.3198 | 8.73E-10 | -0.3252 | 4.58E-10 |
| C11orf75 | CD56bright natural killer | 0.0859  | 1.08E-01 | 0.0860  | 1.08E-01 |
| C5orf15  | CD56bright natural killer | -0.0525 | 3.27E-01 | -0.0371 | 4.89E-01 |

|         |                           |         |          |         |          |
|---------|---------------------------|---------|----------|---------|----------|
| CDHR1   | CD56bright natural killer | -0.0976 | 6.78E-02 | -0.0481 | 3.70E-01 |
| DCAF12  | CD56bright natural killer | 0.1115  | 3.68E-02 | 0.1126  | 3.53E-02 |
| DYNLL1  | CD56bright natural killer | 0.1226  | 2.16E-02 | 0.1283  | 1.63E-02 |
| GPR137B | CD56bright natural killer | 0.0015  | 9.78E-01 | 0.0251  | 6.40E-01 |
| HCP5    | CD56bright natural killer | -0.0137 | 7.97E-01 | 0.0309  | 5.65E-01 |
| HDGFRP2 | CD56bright natural killer | 0.1523  | 4.24E-03 | 0.1439  | 7.02E-03 |
| KRT86   | CD56bright natural killer | -0.0064 | 9.04E-01 | 0.0197  | 7.13E-01 |
| MLST8   | CD56bright natural killer | 0.0241  | 6.52E-01 | 0.0283  | 5.98E-01 |
| ELMOD3  | CD56bright natural killer | 0.0548  | 3.06E-01 | 0.0377  | 4.83E-01 |
| ENTPD5  | CD56bright natural killer | -0.2093 | 7.79E-05 | -0.2077 | 9.06E-05 |
| FAM119A | CD56bright natural killer | 0.2664  | 4.09E-07 | 0.2701  | 2.89E-07 |
| FAM179A | CD56bright natural killer | -0.0324 | 5.45E-01 | 0.0083  | 8.77E-01 |
| CLIC2   | CD56bright natural killer | -0.1201 | 2.45E-02 | -0.0547 | 3.07E-01 |
| COX7A2L | CD56bright natural killer | -0.0184 | 7.31E-01 | -0.0250 | 6.41E-01 |
| CREB3L4 | CD56bright natural killer | 0.3609  | 3.09E-12 | 0.3422  | 4.73E-11 |
| CSF1    | CD56bright natural killer | -0.1049 | 4.96E-02 | -0.0473 | 3.78E-01 |
| CSNK2A2 | CD56bright natural killer | -0.1690 | 1.49E-03 | -0.1622 | 2.33E-03 |
| CSTA    | CD56bright natural killer | 0.0239  | 6.56E-01 | 0.0317  | 5.55E-01 |
| CSTB    | CD56bright natural killer | 0.0486  | 3.64E-01 | 0.0603  | 2.61E-01 |
| CTPS    | CD56bright natural killer | -0.0309 | 5.64E-01 | -0.0157 | 7.69E-01 |
| CTSD    | CD56bright natural killer | -0.1943 | 2.51E-04 | -0.1782 | 8.10E-04 |
| FST     | CD56bright natural killer | -0.1577 | 3.05E-03 | -0.1592 | 2.82E-03 |
| GATA2   | CD56bright natural killer | -0.1516 | 4.41E-03 | -0.1352 | 1.14E-02 |
| GMPR    | CD56bright natural killer | -0.1142 | 3.24E-02 | -0.1131 | 3.45E-02 |
| HDC     | CD56bright natural killer | -0.1686 | 1.53E-03 | -0.1527 | 4.20E-03 |
| HEY1    | CD56bright natural killer | 0.1261  | 1.81E-02 | 0.1317  | 1.37E-02 |
| HOXA1   | CD56bright natural killer | -0.0282 | 5.99E-01 | 0.0346  | 5.19E-01 |
| HS2ST1  | CD56bright natural killer | 0.0466  | 3.85E-01 | 0.0576  | 2.82E-01 |
| HS3ST1  | CD56bright natural killer | -0.1074 | 4.44E-02 | -0.0619 | 2.48E-01 |

|         |                           |         |          |         |          |
|---------|---------------------------|---------|----------|---------|----------|
| BCL11B  | CD56bright natural killer | -0.0529 | 3.23E-01 | 0.0239  | 6.56E-01 |
| CDH3    | CD56bright natural killer | -0.1345 | 1.16E-02 | -0.0854 | 1.11E-01 |
| MYL6B   | CD56bright natural killer | 0.1273  | 1.70E-02 | 0.1289  | 1.58E-02 |
| NAA16   | CD56bright natural killer | 0.1563  | 3.32E-03 | 0.1565  | 3.32E-03 |
| CYP27B1 | CD56bright natural killer | 0.1604  | 2.57E-03 | 0.1814  | 6.51E-04 |
| EIF3M   | CD56bright natural killer | 0.2033  | 1.26E-04 | 0.2077  | 9.06E-05 |
| CYP27A1 | CD56dim natural killer c  | -0.1891 | 3.67E-04 | -0.2030 | 1.31E-04 |
| DDX55   | CD56dim natural killer c  | 0.4036  | 3.51E-15 | 0.4005  | 6.43E-15 |
| DYRK2   | CD56dim natural killer c  | 0.1970  | 2.04E-04 | 0.2320  | 1.16E-05 |
| RPL37A  | CD56dim natural killer c  | 0.1308  | 1.42E-02 | 0.1199  | 2.49E-02 |
| NOTCH3  | CD56dim natural killer c  | -0.1150 | 3.12E-02 | -0.0860 | 1.08E-01 |
| AKR7A3  | CD56dim natural killer c  | -0.3630 | 2.26E-12 | -0.3691 | 9.75E-13 |
| GPRC5C  | CD56dim natural killer c  | -0.0593 | 2.68E-01 | -0.0775 | 1.48E-01 |
| GRIN1   | CD56dim natural killer c  | 0.2177  | 3.91E-05 | 0.2286  | 1.56E-05 |
| HLA-E   | CD56dim natural killer c  | -0.2333 | 1.00E-05 | -0.1968 | 2.12E-04 |
| PORCN   | CD56dim natural killer c  | 0.1514  | 4.48E-03 | 0.1633  | 2.18E-03 |
| PSMC4   | CD56dim natural killer c  | 0.0558  | 2.97E-01 | 0.0571  | 2.87E-01 |
| UPP1    | CD56dim natural killer c  | 0.0765  | 1.52E-01 | 0.1179  | 2.74E-02 |
| IL21R   | CD56dim natural killer c  | 0.0268  | 6.16E-01 | 0.1426  | 7.53E-03 |
| CCR2    | Myeloid derived suppres   | -0.1156 | 3.03E-02 | -0.0455 | 3.96E-01 |
| CD14    | Myeloid derived suppres   | -0.2750 | 1.65E-07 | -0.2616 | 6.90E-07 |
| CD2     | Myeloid derived suppres   | -0.0622 | 2.45E-01 | 0.0271  | 6.13E-01 |
| CD86    | Myeloid derived suppres   | -0.1016 | 5.73E-02 | -0.0127 | 8.12E-01 |
| CXCR4   | Myeloid derived suppres   | -0.0025 | 9.62E-01 | 0.0847  | 1.14E-01 |
| FCGR2A  | Myeloid derived suppres   | -0.0186 | 7.29E-01 | 0.0725  | 1.76E-01 |
| FCGR2B  | Myeloid derived suppres   | -0.0921 | 8.48E-02 | -0.0288 | 5.91E-01 |
| FCGR3A  | Myeloid derived suppres   | -0.0822 | 1.24E-01 | -0.0041 | 9.38E-01 |
| FERMT3  | Myeloid derived suppres   | -0.0529 | 3.23E-01 | 0.0562  | 2.95E-01 |
| GPSM3   | Myeloid derived suppres   | -0.0862 | 1.07E-01 | 0.0082  | 8.78E-01 |

|        |                                 |         |          |         |          |
|--------|---------------------------------|---------|----------|---------|----------|
| IL18BP | Myeloid derived suppressor cell | -0.0831 | 1.20E-01 | -0.0117 | 8.28E-01 |
| IL4R   | Myeloid derived suppressor cell | 0.0556  | 2.99E-01 | 0.0930  | 8.24E-02 |
| ITGAL  | Myeloid derived suppressor cell | 0.0231  | 6.67E-01 | 0.0946  | 7.70E-02 |
| ITGAM  | Myeloid derived suppressor cell | -0.0052 | 9.22E-01 | 0.0806  | 1.32E-01 |
| PARVG  | Myeloid derived suppressor cell | -0.0948 | 7.60E-02 | -0.0008 | 9.88E-01 |
| PSAP   | Myeloid derived suppressor cell | -0.1645 | 1.99E-03 | -0.1298 | 1.51E-02 |
| PTGER2 | Myeloid derived suppressor cell | -0.1714 | 1.27E-03 | -0.1166 | 2.92E-02 |
| PTGES2 | Myeloid derived suppressor cell | 0.1119  | 3.62E-02 | 0.1128  | 3.48E-02 |
| S100A8 | Myeloid derived suppressor cell | -0.0363 | 4.98E-01 | 0.0078  | 8.84E-01 |
| S100A9 | Myeloid derived suppressor cell | 0.0595  | 2.67E-01 | 0.1301  | 1.48E-02 |
| BTN2A2 | Natural killer T cell           | 0.0583  | 2.76E-01 | 0.1024  | 5.56E-02 |
| CD101  | Natural killer T cell           | 0.0334  | 5.33E-01 | 0.1120  | 3.63E-02 |
| CD109  | Natural killer T cell           | 0.0797  | 1.36E-01 | 0.1248  | 1.95E-02 |
| CNPY3  | Natural killer T cell           | 0.2505  | 2.01E-06 | 0.2564  | 1.17E-06 |
| CNPY4  | Natural killer T cell           | 0.0812  | 1.29E-01 | 0.1242  | 2.01E-02 |
| CREB1  | Natural killer T cell           | 0.1921  | 2.94E-04 | 0.2092  | 8.05E-05 |
| CRTC2  | Natural killer T cell           | 0.5377  | 1.10E-27 | 0.5287  | 1.35E-26 |
| CRTC3  | Natural killer T cell           | 0.0942  | 7.79E-02 | 0.1320  | 1.34E-02 |
| CSF2   | Natural killer T cell           | 0.0846  | 1.14E-01 | 0.1266  | 1.78E-02 |
| KLRC1  | Natural killer T cell           | -0.0973 | 6.86E-02 | -0.0478 | 3.72E-01 |
| FUT4   | Natural killer T cell           | 0.2197  | 3.30E-05 | 0.2486  | 2.50E-06 |
| ICAM2  | Natural killer T cell           | -0.0254 | 6.36E-01 | 0.0145  | 7.87E-01 |
| IL32   | Natural killer T cell           | -0.1477 | 5.56E-03 | -0.1228 | 2.16E-02 |
| LAMP2  | Natural killer T cell           | -0.1342 | 1.18E-02 | -0.1217 | 2.27E-02 |
| LILRB5 | Natural killer T cell           | -0.2697 | 2.89E-07 | -0.2362 | 7.95E-06 |
| KLRG1  | Natural killer T cell           | -0.0066 | 9.02E-01 | 0.0549  | 3.06E-01 |
| HSPA4  | Natural killer T cell           | 0.0046  | 9.32E-01 | 0.0193  | 7.20E-01 |
| HSPB6  | Natural killer T cell           | -0.0794 | 1.38E-01 | -0.0499 | 3.52E-01 |
| ISM2   | Natural killer T cell           | 0.0966  | 7.08E-02 | 0.1057  | 4.81E-02 |



|          |                          |         |          |         |          |
|----------|--------------------------|---------|----------|---------|----------|
| ITIH2    | Natural killer T cell    | -0.1148 | 3.16E-02 | -0.1312 | 1.41E-02 |
| KDM4C    | Natural killer T cell    | 0.0544  | 3.10E-01 | 0.0517  | 3.35E-01 |
| KIR2DS4  | Natural killer T cell    | -0.0241 | 6.52E-01 | -0.0154 | 7.74E-01 |
| KIRREL3  | Natural killer T cell    | 0.1328  | 1.28E-02 | 0.1643  | 2.05E-03 |
| SDCBP    | Natural killer T cell    | -0.2351 | 8.54E-06 | -0.2129 | 5.96E-05 |
| NFATC2IP | Natural killer T cell    | 0.1647  | 1.96E-03 | 0.1710  | 1.32E-03 |
| MICB     | Natural killer T cell    | 0.1305  | 1.44E-02 | 0.1769  | 8.90E-04 |
| KIR2DL1  | Natural killer T cell    | -0.0627 | 2.42E-01 | -0.0562 | 2.94E-01 |
| KIR2DL3  | Natural killer T cell    | -0.0680 | 2.04E-01 | -0.0388 | 4.70E-01 |
| KIR3DL1  | Natural killer T cell    | -0.0961 | 7.20E-02 | -0.0751 | 1.61E-01 |
| KIR3DL2  | Natural killer T cell    | 0.0168  | 7.53E-01 | 0.0577  | 2.82E-01 |
| NCR1     | Natural killer T cell    | -0.1054 | 4.84E-02 | -0.0681 | 2.04E-01 |
| FOSL1    | Natural killer T cell    | -0.1283 | 1.62E-02 | -0.0897 | 9.37E-02 |
| TSLP     | Natural killer T cell    | -0.2759 | 1.49E-07 | -0.2653 | 4.76E-07 |
| SLC7A7   | Natural killer T cell    | 0.0228  | 6.71E-01 | 0.1122  | 3.59E-02 |
| SPP1     | Natural killer T cell    | 0.1227  | 2.15E-02 | 0.1651  | 1.94E-03 |
| TREM2    | Natural killer T cell    | 0.0568  | 2.89E-01 | 0.1314  | 1.39E-02 |
| UBASH3A  | Natural killer T cell    | -0.0738 | 1.68E-01 | 0.0040  | 9.41E-01 |
| YBX2     | Natural killer T cell    | 0.0552  | 3.02E-01 | 0.0569  | 2.88E-01 |
| CCDC88A  | Natural killer T cell    | 0.0698  | 1.92E-01 | 0.0981  | 6.67E-02 |
| CLEC1A   | Natural killer T cell    | -0.2488 | 2.36E-06 | -0.2196 | 3.41E-05 |
| THBD     | Natural killer T cell    | -0.2245 | 2.18E-05 | -0.1895 | 3.64E-04 |
| PDPN     | Natural killer T cell    | -0.0352 | 5.11E-01 | 0.0326  | 5.43E-01 |
| VCAM1    | Natural killer T cell    | -0.0579 | 2.79E-01 | -0.0062 | 9.08E-01 |
| EMR1     | Natural killer T cell    | -0.1261 | 1.81E-02 | -0.0687 | 2.00E-01 |
| ABCD1    | Activated dendritic cell | 0.2790  | 1.07E-07 | 0.2918  | 2.69E-08 |
| C1QC     | Activated dendritic cell | -0.1353 | 1.12E-02 | -0.0626 | 2.43E-01 |
| CAPG     | Activated dendritic cell | 0.0707  | 1.86E-01 | 0.1237  | 2.06E-02 |
| CCL3L3   | Activated dendritic cell | 0.0157  | 7.70E-01 | 0.0394  | 4.63E-01 |

|          |                          |         |          |         |          |
|----------|--------------------------|---------|----------|---------|----------|
| CD207    | Activated dendritic cell | -0.0001 | 9.98E-01 | 0.0436  | 4.16E-01 |
| CD302    | Activated dendritic cell | -0.3144 | 1.71E-09 | -0.3349 | 1.28E-10 |
| ATP5B    | Activated dendritic cell | -0.2612 | 6.95E-07 | -0.2563 | 1.18E-06 |
| ATP5L    | Activated dendritic cell | 0.0165  | 7.58E-01 | 0.0164  | 7.60E-01 |
| ATP6V1A  | Activated dendritic cell | -0.1582 | 2.96E-03 | -0.1580 | 3.04E-03 |
| BCL2L1   | Activated dendritic cell | -0.0737 | 1.68E-01 | -0.0823 | 1.25E-01 |
| C1QB     | Activated dendritic cell | -0.1325 | 1.30E-02 | -0.0616 | 2.51E-01 |
| SNURF    | Activated dendritic cell | 0.0822  | 1.24E-01 | 0.0899  | 9.32E-02 |
| SPCS3    | Activated dendritic cell | -0.3019 | 7.89E-09 | -0.2782 | 1.22E-07 |
| CCNA1    | Activated dendritic cell | -0.0115 | 8.30E-01 | 0.0158  | 7.69E-01 |
| NOS2     | Activated dendritic cell | -0.0869 | 1.04E-01 | -0.0770 | 1.51E-01 |
| SRA1     | Activated dendritic cell | -0.0363 | 4.98E-01 | -0.0352 | 5.11E-01 |
| TNFRSF6B | Activated dendritic cell | 0.0769  | 1.50E-01 | 0.1105  | 3.89E-02 |
| TREM1    | Activated dendritic cell | 0.1459  | 6.17E-03 | 0.2086  | 8.42E-05 |
| TREML1   | Activated dendritic cell | 0.0978  | 6.72E-02 | 0.1397  | 8.87E-03 |
| RHOA     | Activated dendritic cell | 0.0520  | 3.31E-01 | 0.0812  | 1.30E-01 |
| SLC25A37 | Activated dendritic cell | 0.0351  | 5.12E-01 | 0.0448  | 4.03E-01 |
| TNFSF14  | Activated dendritic cell | 0.0940  | 7.87E-02 | 0.1128  | 3.49E-02 |
| TREML4   | Activated dendritic cell | 0.0905  | 9.03E-02 | 0.1273  | 1.72E-02 |
| VNN2     | Activated dendritic cell | 0.0603  | 2.60E-01 | 0.1195  | 2.54E-02 |
| XPO6     | Activated dendritic cell | 0.1665  | 1.75E-03 | 0.2163  | 4.47E-05 |
| CLEC4C   | Activated dendritic cell | 0.0340  | 5.25E-01 | 0.0710  | 1.85E-01 |
| TNFAIP2  | Activated dendritic cell | 0.0834  | 1.19E-01 | 0.1205  | 2.42E-02 |
| UBD      | Activated dendritic cell | 0.1675  | 1.64E-03 | 0.2117  | 6.54E-05 |
| ACTR3    | Activated dendritic cell | 0.0734  | 1.70E-01 | 0.1177  | 2.77E-02 |
| RAB1A    | Activated dendritic cell | -0.0354 | 5.09E-01 | -0.0218 | 6.84E-01 |
| SLA      | Activated dendritic cell | -0.1431 | 7.25E-03 | -0.0683 | 2.02E-01 |
| HLA-DQA2 | Activated dendritic cell | -0.0006 | 9.91E-01 | 0.0772  | 1.49E-01 |
| SIGLEC5  | Activated dendritic cell | -0.1104 | 3.87E-02 | -0.0425 | 4.28E-01 |

|         |                          |         |          |         |          |
|---------|--------------------------|---------|----------|---------|----------|
| SLAMF9  | Activated dendritic cell | -0.0597 | 2.65E-01 | -0.0415 | 4.39E-01 |
| CBX6    | Plasmacytoid dendritic c | 0.0522  | 3.30E-01 | 0.0757  | 1.58E-01 |
| DAB2    | Plasmacytoid dendritic c | -0.0764 | 1.53E-01 | -0.0218 | 6.85E-01 |
| DDX17   | Plasmacytoid dendritic c | 0.3297  | 2.42E-10 | 0.3314  | 2.04E-10 |
| HIGD1A  | Plasmacytoid dendritic c | -0.3652 | 1.64E-12 | -0.3719 | 6.37E-13 |
| IDH3A   | Plasmacytoid dendritic c | -0.1865 | 4.45E-04 | -0.1736 | 1.11E-03 |
| IL3RA   | Plasmacytoid dendritic c | -0.0822 | 1.24E-01 | -0.0468 | 3.83E-01 |
| MAGED1  | Plasmacytoid dendritic c | 0.0973  | 6.87E-02 | 0.1161  | 2.98E-02 |
| NUCB2   | Plasmacytoid dendritic c | 0.0843  | 1.15E-01 | 0.0966  | 7.12E-02 |
| OFD1    | Plasmacytoid dendritic c | 0.3656  | 1.52E-12 | 0.3809  | 1.58E-13 |
| OGT     | Plasmacytoid dendritic c | 0.2757  | 1.54E-07 | 0.2823  | 7.77E-08 |
| PDIA4   | Plasmacytoid dendritic c | -0.1374 | 9.96E-03 | -0.1259 | 1.85E-02 |
| SERTAD2 | Plasmacytoid dendritic c | 0.1385  | 9.40E-03 | 0.1257  | 1.86E-02 |
| SIRPA   | Plasmacytoid dendritic c | -0.0755 | 1.58E-01 | -0.0526 | 3.26E-01 |
| TMED2   | Plasmacytoid dendritic c | -0.0156 | 7.71E-01 | -0.0108 | 8.40E-01 |
| ENG     | Plasmacytoid dendritic c | -0.3153 | 1.53E-09 | -0.2884 | 3.94E-08 |
| FCAR    | Plasmacytoid dendritic c | -0.1192 | 2.55E-02 | -0.0675 | 2.08E-01 |
| IGF1    | Plasmacytoid dendritic c | -0.2493 | 2.26E-06 | -0.2426 | 4.41E-06 |
| ITGA2B  | Plasmacytoid dendritic c | 0.0448  | 4.03E-01 | 0.0572  | 2.86E-01 |
| GABARAP | Plasmacytoid dendritic c | -0.1211 | 2.33E-02 | -0.1088 | 4.18E-02 |
| GPX1    | Plasmacytoid dendritic c | -0.1517 | 4.39E-03 | -0.1328 | 1.29E-02 |
| KRT23   | Plasmacytoid dendritic c | 0.0987  | 6.46E-02 | 0.1216  | 2.29E-02 |
| PROK2   | Plasmacytoid dendritic c | 0.0018  | 9.73E-01 | 0.0393  | 4.64E-01 |
| RALB    | Plasmacytoid dendritic c | -0.0712 | 1.83E-01 | -0.0410 | 4.45E-01 |
| RNF141  | Plasmacytoid dendritic c | -0.1081 | 4.29E-02 | -0.0979 | 6.72E-02 |
| SEC14L1 | Plasmacytoid dendritic c | -0.1361 | 1.07E-02 | -0.1007 | 5.99E-02 |
| SEPX1   | Plasmacytoid dendritic c | -0.1818 | 6.22E-04 | -0.1853 | 4.93E-04 |
| EMP3    | Plasmacytoid dendritic c | -0.0397 | 4.58E-01 | 0.0502  | 3.49E-01 |
| CD300LF | Plasmacytoid dendritic c | -0.0441 | 4.10E-01 | 0.0370  | 4.91E-01 |

|          |                             |         |          |         |          |
|----------|-----------------------------|---------|----------|---------|----------|
| ABTB1    | Plasmacytoid dendritic cell | -0.0098 | 8.55E-01 | 0.0035  | 9.48E-01 |
| KLHL21   | Plasmacytoid dendritic cell | -0.0516 | 3.35E-01 | -0.0511 | 3.41E-01 |
| PHRF1    | Plasmacytoid dendritic cell | 0.0651  | 2.24E-01 | 0.0685  | 2.01E-01 |
| ACADM    | Immature dendritic cell     | -0.3155 | 1.50E-09 | -0.3152 | 1.63E-09 |
| AHCYL1   | Immature dendritic cell     | -0.2087 | 8.15E-05 | -0.1976 | 1.99E-04 |
| ALDH1A2  | Immature dendritic cell     | -0.0777 | 1.46E-01 | -0.0490 | 3.61E-01 |
| ALDH3A2  | Immature dendritic cell     | -0.1092 | 4.08E-02 | -0.1514 | 4.54E-03 |
| ALDH9A1  | Immature dendritic cell     | -0.1650 | 1.92E-03 | -0.1757 | 9.65E-04 |
| ALOX15   | Immature dendritic cell     | -0.0227 | 6.71E-01 | -0.0004 | 9.94E-01 |
| AMT      | Immature dendritic cell     | -0.1775 | 8.35E-04 | -0.1972 | 2.05E-04 |
| ARL1     | Immature dendritic cell     | -0.0266 | 6.20E-01 | -0.0074 | 8.90E-01 |
| ATIC     | Immature dendritic cell     | 0.1906  | 3.30E-04 | 0.1969  | 2.10E-04 |
| ATP5A1   | Immature dendritic cell     | -0.3175 | 1.17E-09 | -0.3099 | 3.14E-09 |
| CAPZA1   | Immature dendritic cell     | 0.0863  | 1.06E-01 | 0.1226  | 2.18E-02 |
| LILRA5   | Immature dendritic cell     | -0.1596 | 2.71E-03 | -0.1046 | 5.07E-02 |
| RDX      | Immature dendritic cell     | -0.0545 | 3.09E-01 | -0.0536 | 3.18E-01 |
| RRAGD    | Immature dendritic cell     | 0.1492  | 5.10E-03 | 0.1548  | 3.69E-03 |
| TACSTD2  | Immature dendritic cell     | -0.0276 | 6.06E-01 | 0.0059  | 9.12E-01 |
| INPP5F   | Immature dendritic cell     | 0.1385  | 9.39E-03 | 0.1619  | 2.38E-03 |
| RAB38    | Immature dendritic cell     | 0.0012  | 9.83E-01 | 0.0670  | 2.11E-01 |
| PLAU     | Immature dendritic cell     | -0.0828 | 1.22E-01 | -0.0096 | 8.57E-01 |
| CSF3R    | Immature dendritic cell     | -0.0577 | 2.81E-01 | 0.0256  | 6.33E-01 |
| SLC18A2  | Immature dendritic cell     | -0.0883 | 9.87E-02 | -0.0762 | 1.55E-01 |
| AMPD2    | Immature dendritic cell     | -0.0479 | 3.71E-01 | -0.0459 | 3.92E-01 |
| CLTB     | Immature dendritic cell     | -0.0843 | 1.15E-01 | -0.0715 | 1.82E-01 |
| C1orf162 | Immature dendritic cell     | -0.1404 | 8.44E-03 | -0.0714 | 1.83E-01 |
| AIF1     | Macrophage                  | -0.0976 | 6.77E-02 | -0.0195 | 7.16E-01 |
| CCL14    | Macrophage                  | -0.3149 | 1.62E-09 | -0.3118 | 2.51E-09 |
| CCL23    | Macrophage                  | -0.1505 | 4.72E-03 | -0.1116 | 3.69E-02 |

|         |            |         |          |         |          |
|---------|------------|---------|----------|---------|----------|
| CCL26   | Macrophage | 0.1730  | 1.14E-03 | 0.2150  | 5.01E-05 |
| CD300LB | Macrophage | 0.0175  | 7.44E-01 | 0.0888  | 9.73E-02 |
| CNR1    | Macrophage | -0.0588 | 2.72E-01 | -0.0315 | 5.57E-01 |
| CNR2    | Macrophage | 0.0249  | 6.42E-01 | 0.0781  | 1.45E-01 |
| EIF1    | Macrophage | 0.0690  | 1.97E-01 | 0.0612  | 2.54E-01 |
| EIF4A1  | Macrophage | -0.0296 | 5.80E-01 | -0.0126 | 8.14E-01 |
| FPR1    | Macrophage | -0.0968 | 7.01E-02 | -0.0184 | 7.31E-01 |
| FPR2    | Macrophage | -0.1563 | 3.32E-03 | -0.0996 | 6.26E-02 |
| FRAT2   | Macrophage | 0.1170  | 2.84E-02 | 0.1257  | 1.86E-02 |
| GPR27   | Macrophage | 0.0164  | 7.59E-01 | 0.0284  | 5.96E-01 |
| GPR77   | Macrophage | 0.0377  | 4.82E-01 | 0.0580  | 2.79E-01 |
| RNASE2  | Macrophage | 0.1210  | 2.34E-02 | 0.1733  | 1.13E-03 |
| MS4A2   | Macrophage | -0.1085 | 4.22E-02 | -0.0671 | 2.10E-01 |
| BASP1   | Macrophage | -0.1179 | 2.72E-02 | -0.0444 | 4.08E-01 |
| IGSF6   | Macrophage | -0.1161 | 2.96E-02 | -0.0441 | 4.10E-01 |
| HK3     | Macrophage | -0.0863 | 1.07E-01 | -0.0028 | 9.58E-01 |
| VNN1    | Macrophage | -0.1206 | 2.38E-02 | -0.0983 | 6.62E-02 |
| FES     | Macrophage | 0.0972  | 6.89E-02 | 0.1205  | 2.41E-02 |
| NPL     | Macrophage | 0.0486  | 3.64E-01 | 0.0970  | 6.98E-02 |
| FZD2    | Macrophage | 0.0372  | 4.87E-01 | 0.1164  | 2.94E-02 |
| FAM198B | Macrophage | -0.2512 | 1.87E-06 | -0.2219 | 2.81E-05 |
| HNMT    | Macrophage | -0.2426 | 4.28E-06 | -0.2644 | 5.20E-07 |
| SLC15A3 | Macrophage | -0.1142 | 3.25E-02 | -0.0489 | 3.62E-01 |
| CD4     | Macrophage | -0.2115 | 6.49E-05 | -0.1649 | 1.96E-03 |
| TXNDC3  | Macrophage | -0.0410 | 4.44E-01 | 0.0205  | 7.03E-01 |
| FRMD4A  | Macrophage | 0.0817  | 1.27E-01 | 0.1086  | 4.23E-02 |
| CRYBB1  | Macrophage | -0.0579 | 2.79E-01 | 0.0151  | 7.78E-01 |
| HRH1    | Macrophage | -0.0759 | 1.56E-01 | -0.0165 | 7.58E-01 |
| WNT5B   | Macrophage | -0.0934 | 8.07E-02 | -0.0949 | 7.62E-02 |

|          |            |         |          |         |          |
|----------|------------|---------|----------|---------|----------|
| GIPR     | Eosinophil | 0.1137  | 3.32E-02 | 0.1416  | 7.99E-03 |
| LRMP     | Eosinophil | -0.1068 | 4.55E-02 | -0.0527 | 3.26E-01 |
| FOSB     | Eosinophil | -0.1961 | 2.18E-04 | -0.1735 | 1.12E-03 |
| RRP12    | Eosinophil | 0.1292  | 1.54E-02 | 0.1375  | 9.99E-03 |
| GPR183   | Eosinophil | -0.1183 | 2.66E-02 | -0.0507 | 3.44E-01 |
| NR4A3    | Eosinophil | -0.1533 | 3.99E-03 | -0.1257 | 1.87E-02 |
| ST3GAL6  | Eosinophil | -0.3021 | 7.66E-09 | -0.3151 | 1.67E-09 |
| DEPDC5   | Eosinophil | -0.0057 | 9.16E-01 | -0.0271 | 6.14E-01 |
| PDE6C    | Eosinophil | -0.0259 | 6.29E-01 | -0.0317 | 5.54E-01 |
| PKD2L2   | Eosinophil | 0.0662  | 2.16E-01 | 0.0867  | 1.05E-01 |
| GPR65    | Eosinophil | -0.1336 | 1.23E-02 | -0.0552 | 3.04E-01 |
| IL5RA    | Eosinophil | -0.1301 | 1.47E-02 | -0.0837 | 1.18E-01 |
| P2RY14   | Eosinophil | -0.1761 | 9.22E-04 | -0.1460 | 6.20E-03 |
| DACH1    | Eosinophil | -0.0441 | 4.10E-01 | -0.0167 | 7.55E-01 |
| DAPK2    | Eosinophil | -0.0566 | 2.90E-01 | -0.0530 | 3.23E-01 |
| EMR3     | Eosinophil | 0.0276  | 6.06E-01 | 0.0744  | 1.65E-01 |
| ADAMTS3  | Mast cell  | -0.0441 | 4.10E-01 | 0.0175  | 7.45E-01 |
| CPA3     | Mast cell  | -0.0982 | 6.62E-02 | -0.0556 | 2.99E-01 |
| CMA1     | Mast cell  | -0.1377 | 9.81E-03 | -0.1128 | 3.49E-02 |
| CTSG     | Mast cell  | -0.1636 | 2.10E-03 | -0.1401 | 8.68E-03 |
| ARHGAP15 | Mast cell  | -0.0827 | 1.22E-01 | -0.0075 | 8.88E-01 |
| CPM      | Mast cell  | -0.0626 | 2.42E-01 | -0.0358 | 5.04E-01 |
| FCN1     | Mast cell  | -0.1561 | 3.38E-03 | -0.0989 | 6.45E-02 |
| FTL      | Mast cell  | -0.0072 | 8.93E-01 | 0.0068  | 8.99E-01 |
| HSPA6    | Mast cell  | 0.1476  | 5.61E-03 | 0.2072  | 9.39E-05 |
| ITGA9    | Mast cell  | -0.2025 | 1.33E-04 | -0.1661 | 1.82E-03 |
| RNASE3   | Mast cell  | -0.0042 | 9.37E-01 | 0.0261  | 6.26E-01 |
| S100A4   | Mast cell  | 0.0065  | 9.04E-01 | 0.1078  | 4.38E-02 |
| SIGLEC8  | Mast cell  | -0.1251 | 1.90E-02 | -0.0731 | 1.73E-01 |

|          |            |         |          |         |          |
|----------|------------|---------|----------|---------|----------|
| SLC6A4   | Mast cell  | 0.0066  | 9.02E-01 | 0.0012  | 9.83E-01 |
| PTGS2    | Mast cell  | -0.1324 | 1.30E-02 | -0.0786 | 1.42E-01 |
| EGR3     | Mast cell  | -0.1751 | 9.90E-04 | -0.1266 | 1.78E-02 |
| PILRA    | Mast cell  | -0.0575 | 2.83E-01 | 0.0429  | 4.24E-01 |
| ASGR2    | Monocyte   | -0.1628 | 2.21E-03 | -0.1834 | 5.64E-04 |
| CFP      | Monocyte   | -0.2118 | 6.36E-05 | -0.1726 | 1.19E-03 |
| ASGR1    | Monocyte   | -0.1443 | 6.76E-03 | -0.1686 | 1.55E-03 |
| CD1D     | Monocyte   | -0.1235 | 2.06E-02 | -0.0840 | 1.17E-01 |
| UPK3A    | Monocyte   | 0.1514  | 4.47E-03 | 0.1558  | 3.47E-03 |
| ACTG1    | Monocyte   | 0.0918  | 8.58E-02 | 0.1117  | 3.67E-02 |
| ANXA5    | Monocyte   | 0.0120  | 8.23E-01 | 0.0692  | 1.97E-01 |
| ATP6V1B2 | Monocyte   | -0.1244 | 1.97E-02 | -0.0870 | 1.04E-01 |
| CFL1     | Monocyte   | 0.0483  | 3.67E-01 | 0.0912  | 8.83E-02 |
| DAZAP2   | Monocyte   | -0.0972 | 6.89E-02 | -0.0643 | 2.30E-01 |
| CTBS     | Monocyte   | -0.3146 | 1.66E-09 | -0.3047 | 5.91E-09 |
| EMR4P    | Monocyte   | -0.0597 | 2.65E-01 | -0.0017 | 9.75E-01 |
| HIVEP2   | Monocyte   | 0.0275  | 6.08E-01 | 0.0512  | 3.40E-01 |
| MARCKSL1 | Monocyte   | 0.1779  | 8.16E-04 | 0.2016  | 1.47E-04 |
| MBP      | Monocyte   | -0.0804 | 1.33E-01 | -0.0588 | 2.73E-01 |
| MMP15    | Monocyte   | -0.1081 | 4.30E-02 | -0.1060 | 4.74E-02 |
| PNPLA6   | Monocyte   | -0.0060 | 9.11E-01 | 0.0111  | 8.36E-01 |
| TMBIM6   | Monocyte   | -0.3895 | 3.69E-14 | -0.3983 | 9.35E-15 |
| PQBP1    | Monocyte   | 0.2340  | 9.45E-06 | 0.2297  | 1.43E-05 |
| TEX264   | Monocyte   | -0.2255 | 2.00E-05 | -0.2473 | 2.82E-06 |
| IKZF1    | Monocyte   | -0.1434 | 7.14E-03 | -0.0704 | 1.89E-01 |
| CREB5    | Neutrophil | 0.0197  | 7.13E-01 | 0.0402  | 4.53E-01 |
| CDA      | Neutrophil | -0.1103 | 3.90E-02 | -0.0936 | 8.03E-02 |
| CHST15   | Neutrophil | -0.1642 | 2.02E-03 | -0.1515 | 4.50E-03 |
| S100A12  | Neutrophil | -0.0851 | 1.12E-01 | -0.0613 | 2.52E-01 |

|           |                          |         |          |         |          |
|-----------|--------------------------|---------|----------|---------|----------|
| APOBEC3A  | Neutrophil               | 0.0425  | 4.27E-01 | 0.0881  | 9.99E-02 |
| CASP5     | Neutrophil               | 0.0306  | 5.68E-01 | 0.0932  | 8.16E-02 |
| MMP25     | Neutrophil               | -0.0669 | 2.11E-01 | 0.0089  | 8.68E-01 |
| HAL       | Neutrophil               | -0.0553 | 3.02E-01 | -0.0486 | 3.65E-01 |
| C1orf183  | Neutrophil               | 0.0036  | 9.46E-01 | 0.0186  | 7.29E-01 |
| FFAR2     | Neutrophil               | 0.0418  | 4.35E-01 | 0.0898  | 9.35E-02 |
| MAK       | Neutrophil               | 0.0255  | 6.34E-01 | 0.0430  | 4.23E-01 |
| CXCR1     | Neutrophil               | -0.1047 | 5.00E-02 | -0.0779 | 1.46E-01 |
| STEAP4    | Neutrophil               | -0.3596 | 3.73E-12 | -0.3469 | 2.46E-11 |
| MGAM      | Neutrophil               | 0.0519  | 3.32E-01 | 0.0909  | 8.94E-02 |
| BTNL8     | Neutrophil               | 0.1728  | 1.15E-03 | 0.1840  | 5.41E-04 |
| CXCR2     | Neutrophil               | -0.0767 | 1.51E-01 | -0.0375 | 4.84E-01 |
| TNFRSF10C | Neutrophil               | -0.0303 | 5.72E-01 | -0.0079 | 8.83E-01 |
| VNN3      | Neutrophil               | -0.0447 | 4.03E-01 | -0.0256 | 6.33E-01 |
| CCL2      | TAM                      | -0.1523 | 4.23E-03 | -0.0973 | 6.91E-02 |
| CD68      | TAM                      | -0.2191 | 3.47E-05 | -0.1764 | 9.18E-04 |
| IL10      | TAM                      | -0.1173 | 2.79E-02 | -0.0503 | 3.48E-01 |
| NOS2      | M1 Macrophage            | -0.0869 | 1.04E-01 | -0.0770 | 1.51E-01 |
| IRF5      | M1 Macrophage            | 0.1479  | 5.51E-03 | 0.1661  | 1.82E-03 |
| PTGS2     | M1 Macrophage            | -0.1324 | 1.30E-02 | -0.0786 | 1.42E-01 |
| CD163     | M2 Macrophage            | -0.2106 | 7.02E-05 | -0.1624 | 2.31E-03 |
| VSIG4     | M2 Macrophage            | -0.1559 | 3.41E-03 | -0.0925 | 8.42E-02 |
| MS4A4A    | M2 Macrophage            | -0.1698 | 1.41E-03 | -0.1094 | 4.08E-02 |
| ADPRH     | regulatory T cell marker | -0.0293 | 5.85E-01 | 0.0378  | 4.81E-01 |
| IL1R1     | regulatory T cell marker | -0.2291 | 1.47E-05 | -0.2244 | 2.26E-05 |
| KSR1      | regulatory T cell marker | 0.0331  | 5.37E-01 | 0.0698  | 1.93E-01 |
| SOCS2     | regulatory T cell marker | -0.2577 | 9.88E-07 | -0.2579 | 1.01E-06 |
| SSH1      | regulatory T cell marker | -0.0199 | 7.11E-01 | 0.0060  | 9.11E-01 |
| NFAT5     | regulatory T cell marker | -0.0353 | 5.10E-01 | -0.0211 | 6.94E-01 |



|         |                          |         |          |         |          |
|---------|--------------------------|---------|----------|---------|----------|
| JAK1    | regulatory T cell marker | -0.2072 | 9.23E-05 | -0.1832 | 5.74E-04 |
| CHST7   | regulatory T cell marker | -0.1566 | 3.27E-03 | -0.1353 | 1.13E-02 |
| METTL7A | regulatory T cell marker | -0.3642 | 1.90E-12 | -0.3925 | 2.44E-14 |
| ENTPD1  | regulatory T cell marker | -0.0342 | 5.23E-01 | 0.0334  | 5.33E-01 |
| LY75    | regulatory T cell marker | -0.1373 | 1.00E-02 | -0.0786 | 1.42E-01 |
| ANKRD10 | regulatory T cell marker | 0.2411  | 4.90E-06 | 0.2450  | 3.52E-06 |
| IKZF2   | regulatory T cell marker | -0.1789 | 7.62E-04 | -0.1376 | 9.94E-03 |
| LAX1    | regulatory T cell marker | -0.0740 | 1.67E-01 | -0.0129 | 8.10E-01 |
| LAYN    | regulatory T cell marker | -0.0250 | 6.40E-01 | 0.0239  | 6.56E-01 |
| CSF1    | regulatory T cell marker | -0.1049 | 4.96E-02 | -0.0473 | 3.78E-01 |
| ACSL4   | regulatory T cell marker | 0.1088  | 4.17E-02 | 0.1301  | 1.49E-02 |
| CHRNA6  | regulatory T cell marker | 0.0589  | 2.71E-01 | 0.1107  | 3.84E-02 |
| TMPRSS6 | regulatory T cell marker | -0.0907 | 8.99E-02 | -0.0980 | 6.70E-02 |
| CADM1   | regulatory T cell marker | -0.1215 | 2.29E-02 | -0.1504 | 4.81E-03 |
| CHST2   | regulatory T cell marker | -0.0581 | 2.78E-01 | 0.0087  | 8.71E-01 |
| ZBTB38  | regulatory T cell marker | -0.1331 | 1.26E-02 | -0.1339 | 1.22E-02 |
| MAGEH1  | regulatory T cell marker | 0.0959  | 7.27E-02 | 0.1152  | 3.12E-02 |
| NPTN    | regulatory T cell marker | -0.0004 | 9.94E-01 | 0.0039  | 9.42E-01 |
| RRAGB   | regulatory T cell marker | -0.0372 | 4.88E-01 | -0.0421 | 4.32E-01 |
| ADAT2   | regulatory T cell marker | 0.3058  | 4.95E-09 | 0.3265  | 3.90E-10 |
| LIMA1   | regulatory T cell marker | 0.0162  | 7.62E-01 | 0.0636  | 2.35E-01 |
| ICOS    | regulatory T cell marker | 0.0203  | 7.05E-01 | 0.1211  | 2.35E-02 |
| IL21R   | regulatory T cell marker | 0.0268  | 6.16E-01 | 0.1426  | 7.53E-03 |
| THADA   | regulatory T cell marker | 0.0912  | 8.78E-02 | 0.0873  | 1.03E-01 |
| CSF2RB  | regulatory T cell marker | -0.1148 | 3.16E-02 | -0.0330 | 5.38E-01 |
| SSTR3   | regulatory T cell marker | 0.1566  | 3.26E-03 | 0.1961  | 2.23E-04 |
| LAPTM4B | regulatory T cell marker | 0.2726  | 2.14E-07 | 0.2798  | 1.03E-07 |
| NDFIP2  | regulatory T cell marker | -0.1748 | 1.01E-03 | -0.1806 | 6.87E-04 |
| GCNT1   | regulatory T cell marker | -0.0271 | 6.13E-01 | 0.0503  | 3.49E-01 |

|          |                          |         |          |         |          |
|----------|--------------------------|---------|----------|---------|----------|
| HS3ST3B1 | regulatory T cell marker | -0.1521 | 4.30E-03 | -0.1680 | 1.61E-03 |
| IL1R2    | regulatory T cell marker | -0.0042 | 9.38E-01 | 0.0050  | 9.26E-01 |
| VDR      | regulatory T cell marker | 0.1057  | 4.78E-02 | 0.1404  | 8.51E-03 |
| CTLA4    | regulatory T cell marker | 0.0755  | 1.58E-01 | 0.1751  | 1.01E-03 |
| CASP1    | regulatory T cell marker | -0.0669 | 2.12E-01 | 0.0272  | 6.12E-01 |
| TMEM184C | regulatory T cell marker | -0.1970 | 2.04E-04 | -0.1883 | 3.98E-04 |
| CTSC     | regulatory T cell marker | 0.0083  | 8.76E-01 | 0.0905  | 9.09E-02 |
| HSDL2    | regulatory T cell marker | -0.2154 | 4.71E-05 | -0.2458 | 3.26E-06 |
| LEPROT   | regulatory T cell marker | -0.1936 | 2.64E-04 | -0.1909 | 3.29E-04 |
| PTPRJ    | regulatory T cell marker | -0.0274 | 6.08E-01 | -0.0200 | 7.10E-01 |
| CD274    | regulatory T cell marker | -0.1401 | 8.57E-03 | -0.0897 | 9.40E-02 |
| TIGIT    | regulatory T cell marker | -0.0336 | 5.30E-01 | 0.0568  | 2.89E-01 |
| TRAF3    | regulatory T cell marker | 0.0115  | 8.30E-01 | 0.0634  | 2.37E-01 |
| NETO2    | regulatory T cell marker | 0.0461  | 3.89E-01 | 0.0663  | 2.16E-01 |
| SLC35F2  | regulatory T cell marker | 0.0777  | 1.46E-01 | 0.1487  | 5.31E-03 |
| ACP5     | regulatory T cell marker | -0.0262 | 6.25E-01 | 0.0196  | 7.15E-01 |
| AHCYL1   | regulatory T cell marker | -0.2087 | 8.15E-05 | -0.1976 | 1.99E-04 |
| RNF145   | regulatory T cell marker | 0.0398  | 4.58E-01 | 0.0787  | 1.42E-01 |
| BCL2L1   | regulatory T cell marker | -0.0737 | 1.68E-01 | -0.0823 | 1.25E-01 |
| TNFRSF4  | regulatory T cell marker | 0.1376  | 9.87E-03 | 0.1928  | 2.84E-04 |
| NFE2L3   | regulatory T cell marker | 0.2003  | 1.59E-04 | 0.2749  | 1.74E-07 |
| CCR8     | regulatory T cell marker | -0.0200 | 7.08E-01 | 0.0463  | 3.88E-01 |
| HTATIP2  | regulatory T cell marker | -0.0315 | 5.56E-01 | -0.0212 | 6.93E-01 |
| TNFRSF18 | regulatory T cell marker | 0.0829  | 1.21E-01 | 0.1717  | 1.26E-03 |
| FKBP1A   | regulatory T cell marker | 0.1230  | 2.11E-02 | 0.1586  | 2.92E-03 |
| LTA      | regulatory T cell marker | 0.0212  | 6.93E-01 | 0.1270  | 1.75E-02 |
| BATF     | regulatory T cell marker | -0.0389 | 4.68E-01 | 0.0324  | 5.46E-01 |
| CD177    | regulatory T cell marker | 0.0416  | 4.38E-01 | 0.0908  | 9.00E-02 |
| TFRC     | regulatory T cell marker | 0.1399  | 8.67E-03 | 0.1429  | 7.40E-03 |

|          |                          |         |          |         |          |
|----------|--------------------------|---------|----------|---------|----------|
| ETV7     | regulatory T cell marker | 0.1022  | 5.58E-02 | 0.1655  | 1.89E-03 |
| IL12RB2  | regulatory T cell marker | -0.1550 | 3.61E-03 | -0.1187 | 2.64E-02 |
| ZNF282   | regulatory T cell marker | 0.1325  | 1.30E-02 | 0.1101  | 3.96E-02 |
| ERI1     | regulatory T cell marker | 0.0332  | 5.35E-01 | 0.0653  | 2.23E-01 |
| GRSF1    | regulatory T cell marker | -0.1915 | 3.07E-04 | -0.1794 | 7.47E-04 |
| NAB1     | regulatory T cell marker | 0.1206  | 2.38E-02 | 0.1197  | 2.51E-02 |
| C10orf54 | immune checkpoint ger    | -0.1008 | 5.93E-02 | -0.0466 | 3.84E-01 |
| CD200    | immune checkpoint ger    | -0.0938 | 7.93E-02 | -0.0525 | 3.27E-01 |
| CD40LG   | immune checkpoint ger    | -0.1460 | 6.13E-03 | -0.0879 | 1.01E-01 |
| ADORA2A  | immune checkpoint ger    | 0.1235  | 2.07E-02 | 0.1719  | 1.24E-03 |
| TNFSF14  | immune checkpoint ger    | 0.0940  | 7.87E-02 | 0.1128  | 3.49E-02 |
| BTLA     | immune checkpoint ger    | -0.0500 | 3.51E-01 | 0.0276  | 6.07E-01 |
| CD160    | immune checkpoint ger    | 0.0574  | 2.84E-01 | 0.1050  | 4.96E-02 |
| CD28     | immune checkpoint ger    | -0.1067 | 4.59E-02 | -0.0379 | 4.80E-01 |
| CD44     | immune checkpoint ger    | -0.1328 | 1.28E-02 | -0.0810 | 1.30E-01 |
| CD48     | immune checkpoint ger    | -0.1062 | 4.69E-02 | -0.0248 | 6.44E-01 |
| CD200R1  | immune checkpoint ger    | -0.1457 | 6.26E-03 | -0.0806 | 1.33E-01 |
| NRP1     | immune checkpoint ger    | -0.1440 | 6.90E-03 | -0.1279 | 1.67E-02 |
| TMIGD2   | immune checkpoint ger    | -0.1258 | 1.84E-02 | -0.0773 | 1.49E-01 |
| VTCN1    | immune checkpoint ger    | 0.0275  | 6.08E-01 | 0.0659  | 2.18E-01 |
| ICOS     | immune checkpoint ger    | 0.0203  | 7.05E-01 | 0.1211  | 2.35E-02 |
| TNFSF15  | immune checkpoint ger    | 0.0261  | 6.25E-01 | 0.0663  | 2.16E-01 |
| CD40     | immune checkpoint ger    | -0.1267 | 1.76E-02 | -0.0933 | 8.14E-02 |
| HHLA2    | immune checkpoint ger    | 0.0811  | 1.29E-01 | 0.1092  | 4.12E-02 |
| IDO2     | immune checkpoint ger    | -0.1843 | 5.21E-04 | -0.1619 | 2.39E-03 |
| PDCD1LG2 | immune checkpoint ger    | -0.1893 | 3.61E-04 | -0.1356 | 1.11E-02 |
| TNFRSF14 | immune checkpoint ger    | -0.0725 | 1.76E-01 | -0.0385 | 4.73E-01 |
| TNFRSF25 | immune checkpoint ger    | 0.1293  | 1.53E-02 | 0.1654  | 1.90E-03 |
| CD27     | immune checkpoint ger    | -0.0050 | 9.26E-01 | 0.0874  | 1.03E-01 |

|          |                            |         |          |         |          |
|----------|----------------------------|---------|----------|---------|----------|
| CD86     | immune checkpoint ger      | -0.1016 | 5.73E-02 | -0.0127 | 8.12E-01 |
| CTLA4    | immune checkpoint ger      | 0.0755  | 1.58E-01 | 0.1751  | 1.01E-03 |
| LAIR1    | immune checkpoint ger      | -0.0166 | 7.57E-01 | 0.0947  | 7.68E-02 |
| LGALS9   | immune checkpoint ger      | -0.0109 | 8.39E-01 | 0.0772  | 1.49E-01 |
| CD244    | immune checkpoint ger      | -0.1133 | 3.38E-02 | -0.0554 | 3.01E-01 |
| CD274    | immune checkpoint ger      | -0.1401 | 8.57E-03 | -0.0897 | 9.40E-02 |
| CD276    | immune checkpoint ger      | 0.1045  | 5.04E-02 | 0.1336  | 1.24E-02 |
| CD80     | immune checkpoint ger      | -0.0329 | 5.39E-01 | 0.0491  | 3.60E-01 |
| HAVCR2   | immune checkpoint ger      | -0.0969 | 6.99E-02 | -0.0108 | 8.40E-01 |
| ICOSLG   | immune checkpoint ger      | -0.2541 | 1.41E-06 | -0.2452 | 3.46E-06 |
| PDCD1    | immune checkpoint ger      | 0.0514  | 3.37E-01 | 0.1319  | 1.35E-02 |
| TIGIT    | immune checkpoint ger      | -0.0336 | 5.30E-01 | 0.0568  | 2.89E-01 |
| TNFRSF4  | immune checkpoint ger      | 0.1376  | 9.87E-03 | 0.1928  | 2.84E-04 |
| TNFSF18  | immune checkpoint ger      | -0.0601 | 2.61E-01 | -0.0331 | 5.37E-01 |
| KIR3DL1  | immune checkpoint ger      | -0.0961 | 7.20E-02 | -0.0751 | 1.61E-01 |
| LAG3     | immune checkpoint ger      | 0.0527  | 3.24E-01 | 0.1163  | 2.96E-02 |
| TNFRSF18 | immune checkpoint ger      | 0.0829  | 1.21E-01 | 0.1717  | 1.26E-03 |
| TNFRSF8  | immune checkpoint ger      | -0.0503 | 3.48E-01 | 0.0490  | 3.61E-01 |
| TNFSF4   | immune checkpoint ger      | 0.2993  | 1.07E-08 | 0.3064  | 4.84E-09 |
| CD70     | immune checkpoint ger      | -0.0018 | 9.74E-01 | 0.0865  | 1.06E-01 |
| TNFRSF9  | immune checkpoint ger      | 0.0102  | 8.49E-01 | 0.0685  | 2.01E-01 |
| TNFSF9   | immune checkpoint ger      | 0.1600  | 2.65E-03 | 0.2116  | 6.59E-05 |
| IDO1     | immune checkpoint ger      | -0.0184 | 7.31E-01 | 0.0344  | 5.21E-01 |
| ENG      | immune cell infiltrate ger | -0.3153 | 1.53E-09 | -0.2884 | 3.94E-08 |
| PTPRC    | immune cell infiltrate ger | -0.1326 | 1.29E-02 | -0.0602 | 2.61E-01 |
| MS4A1    | immune cell infiltrate ger | -0.0295 | 5.81E-01 | 0.0330  | 5.38E-01 |
| CD1A     | immune cell infiltrate ger | 0.0465  | 3.85E-01 | 0.1167  | 2.90E-02 |
| TPSB2    | immune cell infiltrate ger | -0.1039 | 5.17E-02 | -0.0678 | 2.05E-01 |
| PDPN     | immune cell infiltrate ger | -0.0352 | 5.11E-01 | 0.0326  | 5.43E-01 |

|          |                           |         |          |         |          |
|----------|---------------------------|---------|----------|---------|----------|
| CXCR5    | immune cell infiltrate ge | 0.0022  | 9.67E-01 | 0.0718  | 1.80E-01 |
| IL3RA    | immune cell infiltrate ge | -0.0822 | 1.24E-01 | -0.0468 | 3.83E-01 |
| CSF3     | immune cell infiltrate ge | -0.1143 | 3.23E-02 | -0.0948 | 7.64E-02 |
| B3GAT1   | immune cell infiltrate ge | 0.0912  | 8.79E-02 | 0.0998  | 6.21E-02 |
| CD247    | immune cell infiltrate ge | -0.1030 | 5.38E-02 | -0.0277 | 6.05E-01 |
| CD8A     | immune cell infiltrate ge | -0.0993 | 6.32E-02 | -0.0288 | 5.91E-01 |
| FOXP3    | immune cell infiltrate ge | -0.1162 | 2.96E-02 | -0.0696 | 1.94E-01 |
| CSF2     | immune cell infiltrate ge | 0.0846  | 1.14E-01 | 0.1266  | 1.78E-02 |
| CD68     | immune cell infiltrate ge | -0.2191 | 3.47E-05 | -0.1764 | 9.18E-04 |
| GIMAP6   | tumor-infiltrating lympho | -0.2432 | 4.04E-06 | -0.2040 | 1.22E-04 |
| CFH      | tumor-infiltrating lympho | -0.1616 | 2.39E-03 | -0.1543 | 3.81E-03 |
| ITGA4    | tumor-infiltrating lympho | -0.0999 | 6.15E-02 | -0.0279 | 6.04E-01 |
| FAM65B   | tumor-infiltrating lympho | -0.1584 | 2.93E-03 | -0.1160 | 3.00E-02 |
| GVIN1    | tumor-infiltrating lympho | -0.1749 | 1.00E-03 | -0.1215 | 2.30E-02 |
| ARHGAP15 | tumor-infiltrating lympho | -0.0827 | 1.22E-01 | -0.0075 | 8.88E-01 |
| ARHGAP25 | tumor-infiltrating lympho | -0.1409 | 8.19E-03 | -0.0712 | 1.84E-01 |
| GIMAP4   | tumor-infiltrating lympho | -0.1817 | 6.27E-04 | -0.1266 | 1.78E-02 |
| GIMAP7   | tumor-infiltrating lympho | -0.2464 | 2.99E-06 | -0.2090 | 8.15E-05 |
| GPSM3    | tumor-infiltrating lympho | -0.0862 | 1.07E-01 | 0.0082  | 8.78E-01 |
| IL16     | tumor-infiltrating lympho | -0.1227 | 2.15E-02 | -0.0535 | 3.19E-01 |
| PIK3CD   | tumor-infiltrating lympho | -0.0714 | 1.82E-01 | 0.0312  | 5.61E-01 |
| PRKCB    | tumor-infiltrating lympho | -0.1239 | 2.03E-02 | -0.0483 | 3.68E-01 |
| SELL     | tumor-infiltrating lympho | -0.0732 | 1.71E-01 | -0.0034 | 9.50E-01 |
| GIMAP5   | tumor-infiltrating lympho | -0.1013 | 5.79E-02 | -0.0487 | 3.64E-01 |
| INPP5D   | tumor-infiltrating lympho | -0.1520 | 4.31E-03 | -0.0869 | 1.05E-01 |
| NLRC3    | tumor-infiltrating lympho | -0.1434 | 7.13E-03 | -0.0794 | 1.38E-01 |
| PRKCQ    | tumor-infiltrating lympho | -0.1132 | 3.41E-02 | -0.0444 | 4.07E-01 |
| TRAT1    | tumor-infiltrating lympho | -0.1266 | 1.77E-02 | -0.0603 | 2.60E-01 |
| ARHGAP30 | tumor-infiltrating lympho | -0.0961 | 7.21E-02 | -0.0034 | 9.50E-01 |

|          |                           |         |          |         |          |
|----------|---------------------------|---------|----------|---------|----------|
| DOCK11   | tumor-infiltrating lympho | -0.0965 | 7.08E-02 | -0.0309 | 5.64E-01 |
| FYB      | tumor-infiltrating lympho | -0.1196 | 2.50E-02 | -0.0418 | 4.35E-01 |
| IKZF1    | tumor-infiltrating lympho | -0.1434 | 7.14E-03 | -0.0704 | 1.89E-01 |
| IL7R     | tumor-infiltrating lympho | -0.1851 | 4.91E-04 | -0.1372 | 1.02E-02 |
| P2RY8    | tumor-infiltrating lympho | -0.1740 | 1.06E-03 | -0.1397 | 8.89E-03 |
| PARVG    | tumor-infiltrating lympho | -0.0948 | 7.60E-02 | -0.0008 | 9.88E-01 |
| PVRIG    | tumor-infiltrating lympho | 0.0283  | 5.97E-01 | 0.0902  | 9.19E-02 |
| TRAF3IP3 | tumor-infiltrating lympho | -0.0918 | 8.60E-02 | -0.0132 | 8.06E-01 |
| CCR7     | tumor-infiltrating lympho | -0.0941 | 7.82E-02 | -0.0267 | 6.19E-01 |
| EVI2B    | tumor-infiltrating lympho | -0.1371 | 1.02E-02 | -0.0612 | 2.54E-01 |
| GPR18    | tumor-infiltrating lympho | -0.0863 | 1.06E-01 | -0.0183 | 7.33E-01 |
| ITK      | tumor-infiltrating lympho | -0.1523 | 4.23E-03 | -0.0884 | 9.87E-02 |
| ITM2C    | tumor-infiltrating lympho | 0.1535  | 3.94E-03 | 0.1711  | 1.32E-03 |
| LAX1     | tumor-infiltrating lympho | -0.0740 | 1.67E-01 | -0.0129 | 8.10E-01 |
| MPEG1    | tumor-infiltrating lympho | -0.1786 | 7.74E-04 | -0.1224 | 2.20E-02 |
| MS4A1    | tumor-infiltrating lympho | -0.0295 | 5.81E-01 | 0.0330  | 5.38E-01 |
| PTPRC    | tumor-infiltrating lympho | -0.1326 | 1.29E-02 | -0.0602 | 2.61E-01 |
| SELPLG   | tumor-infiltrating lympho | -0.1259 | 1.82E-02 | -0.0461 | 3.90E-01 |
| SLAMF6   | tumor-infiltrating lympho | -0.1649 | 1.94E-03 | -0.1049 | 4.98E-02 |
| STAT4    | tumor-infiltrating lympho | -0.0100 | 8.52E-01 | 0.0470  | 3.81E-01 |
| CD28     | tumor-infiltrating lympho | -0.1067 | 4.59E-02 | -0.0379 | 4.80E-01 |
| CD48     | tumor-infiltrating lympho | -0.1062 | 4.69E-02 | -0.0248 | 6.44E-01 |
| CORO1A   | tumor-infiltrating lympho | -0.0339 | 5.27E-01 | 0.0770  | 1.51E-01 |
| DOCK2    | tumor-infiltrating lympho | -0.1236 | 2.05E-02 | -0.0431 | 4.22E-01 |
| KLRD1    | tumor-infiltrating lympho | -0.1774 | 8.43E-04 | -0.1309 | 1.43E-02 |
| LCP2     | tumor-infiltrating lympho | -0.1347 | 1.15E-02 | -0.0590 | 2.71E-01 |
| MAL      | tumor-infiltrating lympho | -0.0654 | 2.21E-01 | 0.0006  | 9.92E-01 |
| PLAC8    | tumor-infiltrating lympho | -0.0429 | 4.23E-01 | 0.0296  | 5.82E-01 |
| SASH3    | tumor-infiltrating lympho | -0.0895 | 9.41E-02 | 0.0071  | 8.94E-01 |

|         |                           |         |          |         |          |
|---------|---------------------------|---------|----------|---------|----------|
| SH2D1A  | tumor-infiltrating lympho | -0.1275 | 1.68E-02 | -0.0591 | 2.70E-01 |
| STK10   | tumor-infiltrating lympho | -0.1245 | 1.97E-02 | -0.0555 | 3.01E-01 |
| ACAP1   | tumor-infiltrating lympho | -0.0730 | 1.72E-01 | 0.0161  | 7.65E-01 |
| ARHGAP9 | tumor-infiltrating lympho | -0.0374 | 4.85E-01 | 0.0715  | 1.82E-01 |
| CCR2    | tumor-infiltrating lympho | -0.1156 | 3.03E-02 | -0.0455 | 3.96E-01 |
| CD2     | tumor-infiltrating lympho | -0.0622 | 2.45E-01 | 0.0271  | 6.13E-01 |
| CD3E    | tumor-infiltrating lympho | -0.0931 | 8.14E-02 | -0.0112 | 8.35E-01 |
| CD52    | tumor-infiltrating lympho | -0.0714 | 1.82E-01 | 0.0150  | 7.80E-01 |
| CD6     | tumor-infiltrating lympho | -0.0676 | 2.06E-01 | 0.0202  | 7.07E-01 |
| GPR171  | tumor-infiltrating lympho | -0.1050 | 4.93E-02 | -0.0332 | 5.36E-01 |
| GZMK    | tumor-infiltrating lympho | -0.1558 | 3.44E-03 | -0.0950 | 7.60E-02 |
| HCLS1   | tumor-infiltrating lympho | -0.1452 | 6.42E-03 | -0.0716 | 1.82E-01 |
| IL2RG   | tumor-infiltrating lympho | -0.0033 | 9.51E-01 | 0.0984  | 6.60E-02 |
| IRF4    | tumor-infiltrating lympho | -0.0078 | 8.84E-01 | 0.0752  | 1.61E-01 |
| LAT     | tumor-infiltrating lympho | 0.0675  | 2.07E-01 | 0.1582  | 3.00E-03 |
| LPXN    | tumor-infiltrating lympho | -0.2089 | 8.06E-05 | -0.1624 | 2.31E-03 |
| MFNG    | tumor-infiltrating lympho | -0.0604 | 2.59E-01 | 0.0085  | 8.74E-01 |
| MS4A6A  | tumor-infiltrating lympho | -0.1529 | 4.08E-03 | -0.0856 | 1.10E-01 |
| NCKAP1L | tumor-infiltrating lympho | -0.1033 | 5.32E-02 | -0.0136 | 8.00E-01 |
| PAX5    | tumor-infiltrating lympho | -0.0388 | 4.69E-01 | -0.0157 | 7.69E-01 |
| PTPRCAP | tumor-infiltrating lympho | -0.0611 | 2.54E-01 | 0.0216  | 6.88E-01 |
| TARP    | tumor-infiltrating lympho | -0.1938 | 2.60E-04 | -0.1473 | 5.75E-03 |
| TCL1A   | tumor-infiltrating lympho | -0.0173 | 7.47E-01 | 0.0380  | 4.79E-01 |
| C1orf38 | tumor-infiltrating lympho | -0.1210 | 2.34E-02 | -0.0396 | 4.60E-01 |
| CD247   | tumor-infiltrating lympho | -0.1030 | 5.38E-02 | -0.0277 | 6.05E-01 |
| CD38    | tumor-infiltrating lympho | -0.0243 | 6.50E-01 | 0.0585  | 2.75E-01 |
| CD53    | tumor-infiltrating lympho | -0.1088 | 4.16E-02 | -0.0165 | 7.58E-01 |
| CFHR1   | tumor-infiltrating lympho | -0.0986 | 6.49E-02 | -0.1080 | 4.35E-02 |
| CSF2RB  | tumor-infiltrating lympho | -0.1148 | 3.16E-02 | -0.0330 | 5.38E-01 |

|          |                           |         |          |         |          |
|----------|---------------------------|---------|----------|---------|----------|
| FCRL3    | tumor-infiltrating lympho | 0.0050  | 9.26E-01 | 0.0697  | 1.93E-01 |
| GLYR1    | tumor-infiltrating lympho | -0.1165 | 2.91E-02 | -0.1210 | 2.36E-02 |
| ICOS     | tumor-infiltrating lympho | 0.0203  | 7.05E-01 | 0.1211  | 2.35E-02 |
| IFFO1    | tumor-infiltrating lympho | 0.0321  | 5.49E-01 | 0.0419  | 4.35E-01 |
| IL10RA   | tumor-infiltrating lympho | -0.1408 | 8.25E-03 | -0.0724 | 1.76E-01 |
| IL2RB    | tumor-infiltrating lympho | -0.1291 | 1.55E-02 | -0.0558 | 2.98E-01 |
| KLHL6    | tumor-infiltrating lympho | -0.1347 | 1.15E-02 | -0.0599 | 2.64E-01 |
| LCK      | tumor-infiltrating lympho | -0.0842 | 1.15E-01 | 0.0036  | 9.47E-01 |
| LY9      | tumor-infiltrating lympho | -0.0723 | 1.77E-01 | 0.0149  | 7.82E-01 |
| PLEK     | tumor-infiltrating lympho | -0.0666 | 2.13E-01 | 0.0275  | 6.08E-01 |
| TBC1D10C | tumor-infiltrating lympho | -0.0428 | 4.24E-01 | 0.0312  | 5.61E-01 |
| CD3G     | tumor-infiltrating lympho | -0.0688 | 1.99E-01 | 0.0126  | 8.14E-01 |
| CD40     | tumor-infiltrating lympho | -0.1267 | 1.76E-02 | -0.0933 | 8.14E-02 |
| CD79A    | tumor-infiltrating lympho | -0.0195 | 7.15E-01 | 0.0482  | 3.69E-01 |
| CYBB     | tumor-infiltrating lympho | -0.0917 | 8.61E-02 | -0.0033 | 9.51E-01 |
| FCRL5    | tumor-infiltrating lympho | -0.0174 | 7.45E-01 | 0.0582  | 2.78E-01 |
| LILRB1   | tumor-infiltrating lympho | -0.1398 | 8.73E-03 | -0.0703 | 1.90E-01 |
| PAG1     | tumor-infiltrating lympho | 0.0380  | 4.78E-01 | 0.0809  | 1.31E-01 |
| SIRPG    | tumor-infiltrating lympho | 0.0218  | 6.84E-01 | 0.1109  | 3.82E-02 |
| SLAMF1   | tumor-infiltrating lympho | -0.1092 | 4.10E-02 | -0.0322 | 5.49E-01 |
| TBX21    | tumor-infiltrating lympho | -0.1340 | 1.20E-02 | -0.0763 | 1.54E-01 |
| VAMP5    | tumor-infiltrating lympho | -0.2166 | 4.26E-05 | -0.2004 | 1.61E-04 |
| CCL5     | tumor-infiltrating lympho | -0.1204 | 2.41E-02 | -0.0516 | 3.35E-01 |
| CD27     | tumor-infiltrating lympho | -0.0050 | 9.26E-01 | 0.0874  | 1.03E-01 |
| CD3D     | tumor-infiltrating lympho | 0.0226  | 6.73E-01 | 0.1133  | 3.41E-02 |
| CD86     | tumor-infiltrating lympho | -0.1016 | 5.73E-02 | -0.0127 | 8.12E-01 |
| CD8A     | tumor-infiltrating lympho | -0.0993 | 6.32E-02 | -0.0288 | 5.91E-01 |
| CLEC2D   | tumor-infiltrating lympho | 0.1773  | 8.48E-04 | 0.2265  | 1.88E-05 |
| CST7     | tumor-infiltrating lympho | -0.1461 | 6.11E-03 | -0.0847 | 1.14E-01 |



|          |                           |         |          |         |          |
|----------|---------------------------|---------|----------|---------|----------|
| HCST     | tumor-infiltrating lympho | -0.0941 | 7.83E-02 | -0.0161 | 7.64E-01 |
| KLRK1    | tumor-infiltrating lympho | -0.1338 | 1.21E-02 | -0.0723 | 1.77E-01 |
| NCF4     | tumor-infiltrating lympho | -0.0373 | 4.86E-01 | 0.0654  | 2.22E-01 |
| SIT1     | tumor-infiltrating lympho | -0.0112 | 8.34E-01 | 0.0910  | 8.92E-02 |
| XCL1     | tumor-infiltrating lympho | 0.0367  | 4.93E-01 | 0.0999  | 6.19E-02 |
| XCL2     | tumor-infiltrating lympho | -0.0189 | 7.24E-01 | 0.0475  | 3.75E-01 |
| DOK2     | tumor-infiltrating lympho | -0.0807 | 1.31E-01 | 0.0150  | 7.79E-01 |
| F5       | tumor-infiltrating lympho | -0.0327 | 5.42E-01 | -0.0632 | 2.38E-01 |
| MGC29506 | tumor-infiltrating lympho | -0.0263 | 6.23E-01 | 0.0498  | 3.53E-01 |
| TIGIT    | tumor-infiltrating lympho | -0.0336 | 5.30E-01 | 0.0568  | 2.89E-01 |
| TNFRSF4  | tumor-infiltrating lympho | 0.1376  | 9.87E-03 | 0.1928  | 2.84E-04 |
| SPNS1    | tumor-infiltrating lympho | 0.1269  | 1.74E-02 | 0.1473  | 5.76E-03 |
| CEP55    | cancer-testis antigen ge  | 0.3634  | 2.14E-12 | 0.3928  | 2.33E-14 |
| KIF2C    | cancer-testis antigen ge  | 0.4323  | 2.04E-17 | 0.4499  | 7.61E-19 |
| OIP5     | cancer-testis antigen ge  | 0.3761  | 3.07E-13 | 0.3830  | 1.12E-13 |
| TTK      | cancer-testis antigen ge  | 0.4439  | 2.24E-18 | 0.4540  | 3.38E-19 |
| CASC5    | cancer-testis antigen ge  | 0.1124  | 3.52E-02 | 0.1198  | 2.50E-02 |
| NUF2     | cancer-testis antigen ge  | 0.5126  | 6.60E-25 | 0.5176  | 2.25E-25 |
| PBK      | cancer-testis antigen ge  | 0.3455  | 2.81E-11 | 0.3510  | 1.38E-11 |
| FANCA    | cancer-testis antigen ge  | 0.2039  | 1.20E-04 | 0.2270  | 1.80E-05 |
| KIF20B   | cancer-testis antigen ge  | 0.3000  | 9.84E-09 | 0.3051  | 5.66E-09 |
| ATAD2    | cancer-testis antigen ge  | 0.3250  | 4.43E-10 | 0.3219  | 6.98E-10 |
| MAGEA6   | cancer-testis antigen ge  | -0.0395 | 4.61E-01 | -0.0012 | 9.82E-01 |
| MAGEA3   | cancer-testis antigen ge  | -0.0409 | 4.45E-01 | -0.0065 | 9.04E-01 |
| ZNF165   | cancer-testis antigen ge  | 0.2083  | 8.42E-05 | 0.2085  | 8.52E-05 |
| ACTL8    | cancer-testis antigen ge  | 0.0686  | 2.00E-01 | 0.0722  | 1.78E-01 |
| GPATCH2  | cancer-testis antigen ge  | 0.3214  | 7.08E-10 | 0.3158  | 1.52E-09 |
| MAGEA1   | cancer-testis antigen ge  | -0.0410 | 4.44E-01 | -0.0157 | 7.69E-01 |
| MAGEA12  | cancer-testis antigen ge  | -0.0002 | 9.96E-01 | 0.0302  | 5.74E-01 |

|         |                          |         |          |         |          |
|---------|--------------------------|---------|----------|---------|----------|
| MAGEA2  | cancer-testis antigen ge | 0.0052  | 9.22E-01 | 0.0322  | 5.48E-01 |
| MAGEA4  | cancer-testis antigen ge | 0.1820  | 6.12E-04 | 0.1977  | 1.97E-04 |
| PRAME   | cancer-testis antigen ge | 0.1907  | 3.26E-04 | 0.2034  | 1.27E-04 |
| CSAG1   | cancer-testis antigen ge | 0.0125  | 8.16E-01 | 0.0397  | 4.59E-01 |
| MAGEC1  | cancer-testis antigen ge | 0.0737  | 1.68E-01 | 0.0944  | 7.78E-02 |
| MAGEC2  | cancer-testis antigen ge | 0.0597  | 2.65E-01 | 0.0869  | 1.05E-01 |
| XAGE1D  | cancer-testis antigen ge | 0.0442  | 4.09E-01 | 0.0752  | 1.60E-01 |
| CAGE1   | cancer-testis antigen ge | 0.1816  | 6.28E-04 | 0.1817  | 6.35E-04 |
| CSAG2   | cancer-testis antigen ge | 0.0554  | 3.01E-01 | 0.0887  | 9.77E-02 |
| CTAG1B  | cancer-testis antigen ge | 0.0662  | 2.16E-01 | 0.1013  | 5.82E-02 |
| GAGE12D | cancer-testis antigen ge | 0.1601  | 2.63E-03 | 0.1874  | 4.23E-04 |
| GAGE4   | cancer-testis antigen ge | 0.1111  | 3.75E-02 | 0.1452  | 6.49E-03 |
| IMP3    | cancer-testis antigen ge | -0.0984 | 6.55E-02 | -0.1104 | 3.90E-02 |
| MAGEA9B | cancer-testis antigen ge | 0.1581  | 2.97E-03 | 0.1781  | 8.17E-04 |
| MAGEB6  | cancer-testis antigen ge | 0.0403  | 4.52E-01 | 0.0536  | 3.17E-01 |
| ODF2    | cancer-testis antigen ge | 0.1962  | 2.16E-04 | 0.2331  | 1.05E-05 |
| PIWIL2  | cancer-testis antigen ge | -0.1147 | 3.17E-02 | -0.1071 | 4.52E-02 |
| POTEE   | cancer-testis antigen ge | -0.0434 | 4.18E-01 | -0.0169 | 7.53E-01 |
| SLCO6A1 | cancer-testis antigen ge | 0.0644  | 2.28E-01 | 0.0923  | 8.47E-02 |
| SSX1    | cancer-testis antigen ge | 0.0185  | 7.30E-01 | 0.0482  | 3.68E-01 |
| SSX2    | cancer-testis antigen ge | 0.0485  | 3.65E-01 | 0.0759  | 1.56E-01 |
| SSX6    | cancer-testis antigen ge | 0.0567  | 2.89E-01 | 0.0801  | 1.35E-01 |
| ARX     | cancer-testis antigen ge | 0.0275  | 6.07E-01 | 0.0492  | 3.59E-01 |
| BAGE    | cancer-testis antigen ge | 0.0165  | 7.58E-01 | 0.0376  | 4.84E-01 |
| CTAG2   | cancer-testis antigen ge | 0.0686  | 2.00E-01 | 0.1038  | 5.23E-02 |
| DDX53   | cancer-testis antigen ge | -0.0090 | 8.66E-01 | 0.0060  | 9.11E-01 |
| DSCR8   | cancer-testis antigen ge | 0.0026  | 9.61E-01 | 0.0187  | 7.27E-01 |
| GAGE12J | cancer-testis antigen ge | 0.1331  | 1.26E-02 | 0.1620  | 2.37E-03 |
| GAGE2A  | cancer-testis antigen ge | 0.1633  | 2.15E-03 | 0.1854  | 4.88E-04 |

|          |                          |         |          |         |          |
|----------|--------------------------|---------|----------|---------|----------|
| HORMAD1  | cancer-testis antigen ge | 0.0808  | 1.31E-01 | 0.1149  | 3.17E-02 |
| HORMAD2  | cancer-testis antigen ge | -0.1827 | 5.84E-04 | -0.1854 | 4.90E-04 |
| IGSF11   | cancer-testis antigen ge | 0.0191  | 7.22E-01 | 0.0575  | 2.83E-01 |
| KDM5B    | cancer-testis antigen ge | 0.2376  | 6.82E-06 | 0.2419  | 4.71E-06 |
| MAGEA11  | cancer-testis antigen ge | 0.0635  | 2.35E-01 | 0.0991  | 6.40E-02 |
| MAGEA8   | cancer-testis antigen ge | 0.1081  | 4.30E-02 | 0.1282  | 1.64E-02 |
| PAGE1    | cancer-testis antigen ge | 0.1173  | 2.80E-02 | 0.1315  | 1.38E-02 |
| PAGE5    | cancer-testis antigen ge | -0.0686 | 2.00E-01 | -0.0428 | 4.24E-01 |
| SSX4     | cancer-testis antigen ge | 0.0667  | 2.12E-01 | 0.0938  | 7.97E-02 |
| TPTE     | cancer-testis antigen ge | 0.0709  | 1.85E-01 | 0.0847  | 1.14E-01 |
| BAGE2    | cancer-testis antigen ge | 0.0375  | 4.84E-01 | 0.0439  | 4.13E-01 |
| CALR3    | cancer-testis antigen ge | 0.0988  | 6.45E-02 | 0.0851  | 1.12E-01 |
| DCAF12   | cancer-testis antigen ge | 0.1115  | 3.68E-02 | 0.1126  | 3.53E-02 |
| FAM133A  | cancer-testis antigen ge | 0.1069  | 4.53E-02 | 0.1529  | 4.14E-03 |
| MAGEA5   | cancer-testis antigen ge | 0.2001  | 1.60E-04 | 0.1979  | 1.95E-04 |
| MAGEB2   | cancer-testis antigen ge | 0.0110  | 8.37E-01 | 0.0346  | 5.19E-01 |
| RQCD1    | cancer-testis antigen ge | 0.1801  | 7.00E-04 | 0.2066  | 9.91E-05 |
| SPA17    | cancer-testis antigen ge | 0.1985  | 1.82E-04 | 0.2116  | 6.64E-05 |
| SSX5     | cancer-testis antigen ge | 0.0303  | 5.71E-01 | 0.0598  | 2.65E-01 |
| TEX15    | cancer-testis antigen ge | 0.0034  | 9.50E-01 | 0.0194  | 7.18E-01 |
| ACRBP    | cancer-testis antigen ge | 0.0130  | 8.08E-01 | 0.0433  | 4.19E-01 |
| ANKRD45  | cancer-testis antigen ge | 0.0743  | 1.65E-01 | 0.0975  | 6.84E-02 |
| CABYR    | cancer-testis antigen ge | 0.2820  | 7.70E-08 | 0.2930  | 2.34E-08 |
| COX6B2   | cancer-testis antigen ge | 0.0723  | 1.77E-01 | 0.0955  | 7.43E-02 |
| CXorf48  | cancer-testis antigen ge | 0.1454  | 6.34E-03 | 0.1719  | 1.25E-03 |
| FATE1    | cancer-testis antigen ge | 0.1276  | 1.67E-02 | 0.1223  | 2.21E-02 |
| KIAA0100 | cancer-testis antigen ge | 0.2157  | 4.61E-05 | 0.2348  | 9.07E-06 |
| LY6K     | cancer-testis antigen ge | 0.0061  | 9.10E-01 | 0.0034  | 9.50E-01 |
| NR6A1    | cancer-testis antigen ge | 0.1811  | 6.54E-04 | 0.1820  | 6.22E-04 |

|         |                          |         |          |         |          |
|---------|--------------------------|---------|----------|---------|----------|
| NXF2    | cancer-testis antigen ge | 0.0253  | 6.36E-01 | 0.0441  | 4.11E-01 |
| OTOA    | cancer-testis antigen ge | -0.1843 | 5.20E-04 | -0.1471 | 5.81E-03 |
| PAGE2   | cancer-testis antigen ge | 0.0937  | 7.95E-02 | 0.1178  | 2.76E-02 |
| PAGE2B  | cancer-testis antigen ge | 0.0378  | 4.81E-01 | 0.0563  | 2.94E-01 |
| PLAC1   | cancer-testis antigen ge | 0.1768  | 8.78E-04 | 0.2250  | 2.14E-05 |
| SPAG4   | cancer-testis antigen ge | -0.0326 | 5.42E-01 | -0.0175 | 7.44E-01 |
| SSX3    | cancer-testis antigen ge | 0.0492  | 3.58E-01 | 0.0809  | 1.31E-01 |
| TAF7L   | cancer-testis antigen ge | -0.0821 | 1.25E-01 | -0.0921 | 8.55E-02 |
| TMEFF1  | cancer-testis antigen ge | 0.1395  | 8.89E-03 | 0.1676  | 1.65E-03 |
| TULP2   | cancer-testis antigen ge | 0.0675  | 2.07E-01 | 0.0732  | 1.72E-01 |
| XAGE5   | cancer-testis antigen ge | 0.0318  | 5.53E-01 | 0.0606  | 2.58E-01 |
| CCDC110 | cancer-testis antigen ge | 0.0343  | 5.22E-01 | 0.0407  | 4.48E-01 |
| CCDC62  | cancer-testis antigen ge | 0.1209  | 2.35E-02 | 0.1455  | 6.38E-03 |
| CEP290  | cancer-testis antigen ge | 0.2194  | 3.37E-05 | 0.2262  | 1.93E-05 |
| CTCFL   | cancer-testis antigen ge | 0.0701  | 1.90E-01 | 0.0593  | 2.68E-01 |
| CTNNA2  | cancer-testis antigen ge | -0.0179 | 7.39E-01 | -0.0402 | 4.53E-01 |
| DKKL1   | cancer-testis antigen ge | 0.1356  | 1.10E-02 | 0.1472  | 5.80E-03 |
| FBXO39  | cancer-testis antigen ge | -0.0880 | 9.99E-02 | -0.0680 | 2.04E-01 |
| LYPD6B  | cancer-testis antigen ge | 0.1481  | 5.43E-03 | 0.1805  | 6.94E-04 |
| MAEL    | cancer-testis antigen ge | 0.1675  | 1.64E-03 | 0.1750  | 1.01E-03 |
| MAGEB1  | cancer-testis antigen ge | 0.0339  | 5.27E-01 | 0.0554  | 3.02E-01 |
| NOL4    | cancer-testis antigen ge | -0.1038 | 5.20E-02 | -0.0922 | 8.50E-02 |
| PAGE4   | cancer-testis antigen ge | -0.1301 | 1.47E-02 | -0.1431 | 7.33E-03 |
| PIWIL1  | cancer-testis antigen ge | 0.0686  | 2.00E-01 | 0.0809  | 1.31E-01 |
| RBM46   | cancer-testis antigen ge | 0.0252  | 6.37E-01 | 0.0237  | 6.58E-01 |
| SPAG1   | cancer-testis antigen ge | 0.0598  | 2.64E-01 | 0.0819  | 1.26E-01 |
| TEKT5   | cancer-testis antigen ge | -0.0109 | 8.39E-01 | -0.0208 | 6.98E-01 |
| TEX14   | cancer-testis antigen ge | 0.1750  | 9.92E-04 | 0.1681  | 1.59E-03 |
| TMEFF2  | cancer-testis antigen ge | -0.0655 | 2.21E-01 | -0.0663 | 2.16E-01 |

|          |                          |         |          |         |          |
|----------|--------------------------|---------|----------|---------|----------|
| TSSK6    | cancer-testis antigen ge | 0.0131  | 8.07E-01 | -0.0111 | 8.36E-01 |
| AKAP3    | cancer-testis antigen ge | -0.1961 | 2.19E-04 | -0.2005 | 1.59E-04 |
| ARMC3    | cancer-testis antigen ge | 0.1995  | 1.68E-04 | 0.2081  | 8.80E-05 |
| CCNA1    | cancer-testis antigen ge | -0.0115 | 8.30E-01 | 0.0158  | 7.69E-01 |
| CTAGE1   | cancer-testis antigen ge | -0.1644 | 2.00E-03 | -0.1790 | 7.66E-04 |
| CTAGE5   | cancer-testis antigen ge | -0.2618 | 6.56E-07 | -0.2975 | 1.38E-08 |
| ELOVL4   | cancer-testis antigen ge | 0.0130  | 8.08E-01 | 0.0592  | 2.70E-01 |
| HSPB9    | cancer-testis antigen ge | 0.0331  | 5.36E-01 | 0.0092  | 8.63E-01 |
| LDHC     | cancer-testis antigen ge | 0.0125  | 8.16E-01 | 0.0043  | 9.35E-01 |
| PRSS50   | cancer-testis antigen ge | 0.1578  | 3.02E-03 | 0.1386  | 9.42E-03 |
| ROPN1    | cancer-testis antigen ge | 0.0279  | 6.02E-01 | 0.0134  | 8.03E-01 |
| SPAG6    | cancer-testis antigen ge | 0.2224  | 2.61E-05 | 0.2262  | 1.94E-05 |
| SPAG9    | cancer-testis antigen ge | 0.0347  | 5.17E-01 | 0.0434  | 4.18E-01 |
| SYCE1    | cancer-testis antigen ge | 0.0104  | 8.47E-01 | 0.0308  | 5.66E-01 |
| TEX101   | cancer-testis antigen ge | -0.0264 | 6.22E-01 | -0.0029 | 9.58E-01 |
| TFDP3    | cancer-testis antigen ge | -0.0587 | 2.73E-01 | -0.0473 | 3.78E-01 |
| TPPP2    | cancer-testis antigen ge | -0.3604 | 3.33E-12 | -0.3769 | 2.93E-13 |
| TSGA10   | cancer-testis antigen ge | 0.0403  | 4.52E-01 | 0.0486  | 3.65E-01 |
| C21orf99 | cancer-testis antigen ge | 0.0724  | 1.76E-01 | 0.1055  | 4.85E-02 |
| CCDC36   | cancer-testis antigen ge | 0.0523  | 3.28E-01 | 0.0837  | 1.18E-01 |
| CRISP2   | cancer-testis antigen ge | 0.0599  | 2.63E-01 | 0.0903  | 9.16E-02 |
| CT47B1   | cancer-testis antigen ge | 0.0312  | 5.60E-01 | 0.0530  | 3.23E-01 |
| FMR1NB   | cancer-testis antigen ge | 0.0617  | 2.49E-01 | 0.0669  | 2.12E-01 |
| IL13RA2  | cancer-testis antigen ge | -0.0023 | 9.65E-01 | 0.0410  | 4.44E-01 |
| MAGEC3   | cancer-testis antigen ge | 0.1431  | 7.27E-03 | 0.1447  | 6.68E-03 |
| MORC1    | cancer-testis antigen ge | -0.0006 | 9.92E-01 | 0.0063  | 9.06E-01 |
| RGS22    | cancer-testis antigen ge | -0.0546 | 3.07E-01 | -0.0426 | 4.26E-01 |
| SPAG17   | cancer-testis antigen ge | 0.0832  | 1.20E-01 | 0.1151  | 3.13E-02 |
| SPAG8    | cancer-testis antigen ge | 0.1661  | 1.79E-03 | 0.1722  | 1.22E-03 |

|          |                          |         |          |         |          |
|----------|--------------------------|---------|----------|---------|----------|
| SPEF2    | cancer-testis antigen ge | 0.3994  | 7.15E-15 | 0.3918  | 2.75E-14 |
| TDRD6    | cancer-testis antigen ge | -0.0666 | 2.13E-01 | -0.0548 | 3.07E-01 |
| TMEM108  | cancer-testis antigen ge | -0.0186 | 7.28E-01 | 0.0205  | 7.03E-01 |
| XAGE3    | cancer-testis antigen ge | -0.0255 | 6.34E-01 | -0.0210 | 6.96E-01 |
| DDX43    | cancer-testis antigen ge | -0.0059 | 9.12E-01 | 0.0188  | 7.27E-01 |
| GPAT2    | cancer-testis antigen ge | -0.0720 | 1.79E-01 | -0.0485 | 3.66E-01 |
| HEMGN    | cancer-testis antigen ge | -0.1278 | 1.66E-02 | -0.1072 | 4.51E-02 |
| NLRP4    | cancer-testis antigen ge | 0.0237  | 6.59E-01 | 0.0610  | 2.55E-01 |
| PRSS55   | cancer-testis antigen ge | 0.1575  | 3.09E-03 | 0.1570  | 3.24E-03 |
| RNF17    | cancer-testis antigen ge | 0.1465  | 5.95E-03 | 0.1802  | 7.06E-04 |
| TDRD1    | cancer-testis antigen ge | 0.0407  | 4.47E-01 | 0.0618  | 2.49E-01 |
| HLA-DOA  | HLA genes                | -0.1057 | 4.78E-02 | -0.0259 | 6.29E-01 |
| HLA-DOB  | HLA genes                | 0.0488  | 3.62E-01 | 0.1353  | 1.13E-02 |
| HLA-DPB1 | HLA genes                | -0.1093 | 4.07E-02 | -0.0323 | 5.47E-01 |
| HLA-DQA1 | HLA genes                | -0.0808 | 1.31E-01 | -0.0047 | 9.30E-01 |
| HLA-DQB2 | HLA genes                | 0.0010  | 9.85E-01 | 0.0884  | 9.86E-02 |
| HLA-J    | HLA genes                | 0.0583  | 2.76E-01 | 0.0975  | 6.86E-02 |
| HLA-A    | HLA genes                | -0.0877 | 1.01E-01 | -0.0417 | 4.37E-01 |
| HLA-DPA1 | HLA genes                | -0.1399 | 8.66E-03 | -0.0697 | 1.93E-01 |
| HLA-DPB2 | HLA genes                | -0.0360 | 5.02E-01 | 0.0350  | 5.13E-01 |
| HLA-DQA2 | HLA genes                | -0.0006 | 9.91E-01 | 0.0772  | 1.49E-01 |
| HLA-DRA  | HLA genes                | -0.1168 | 2.87E-02 | -0.0461 | 3.90E-01 |
| HLA-E    | HLA genes                | -0.2333 | 1.00E-05 | -0.1968 | 2.12E-04 |
| HLA-H    | HLA genes                | -0.0638 | 2.33E-01 | -0.0172 | 7.48E-01 |
| HLA-B    | HLA genes                | -0.1148 | 3.15E-02 | -0.0678 | 2.06E-01 |
| HLA-DMB  | HLA genes                | -0.0692 | 1.96E-01 | 0.0169  | 7.53E-01 |
| HLA-DQB1 | HLA genes                | -0.0946 | 7.67E-02 | -0.0230 | 6.67E-01 |
| HLA-DRB1 | HLA genes                | -0.1109 | 3.79E-02 | -0.0458 | 3.93E-01 |
| HLA-F    | HLA genes                | -0.0670 | 2.11E-01 | -0.0194 | 7.17E-01 |

|           |                          |         |          |         |          |
|-----------|--------------------------|---------|----------|---------|----------|
| HLA-C     | HLA genes                | -0.1371 | 1.01E-02 | -0.1001 | 6.14E-02 |
| HLA-DMA   | HLA genes                | -0.0695 | 1.94E-01 | -0.0043 | 9.35E-01 |
| HLA-DRB5  | HLA genes                | -0.0813 | 1.29E-01 | -0.0249 | 6.42E-01 |
| HLA-G     | HLA genes                | -0.0998 | 6.19E-02 | -0.0682 | 2.03E-01 |
| HLA-L     | HLA genes                | -0.0499 | 3.51E-01 | -0.0081 | 8.79E-01 |
| HLA-DRB6  | HLA genes                | -0.0602 | 2.61E-01 | 0.0117  | 8.28E-01 |
| TNFAIP8L3 | cytokine and cytokine re | 0.0670  | 2.10E-01 | 0.1001  | 6.14E-02 |
| CCL14     | cytokine and cytokine re | -0.3149 | 1.62E-09 | -0.3118 | 2.51E-09 |
| CX3CR1    | cytokine and cytokine re | -0.1435 | 7.08E-03 | -0.1080 | 4.34E-02 |
| CCL21     | cytokine and cytokine re | -0.0931 | 8.15E-02 | -0.0508 | 3.44E-01 |
| IL1R1     | cytokine and cytokine re | -0.2291 | 1.47E-05 | -0.2244 | 2.26E-05 |
| IL33      | cytokine and cytokine re | -0.2170 | 4.13E-05 | -0.1888 | 3.83E-04 |
| CCL19     | cytokine and cytokine re | -0.0462 | 3.89E-01 | 0.0081  | 8.80E-01 |
| CCR6      | cytokine and cytokine re | 0.1354  | 1.11E-02 | 0.1727  | 1.18E-03 |
| IL16      | cytokine and cytokine re | -0.1227 | 2.15E-02 | -0.0535 | 3.19E-01 |
| IL17D     | cytokine and cytokine re | 0.0691  | 1.97E-01 | 0.0889  | 9.69E-02 |
| TGFB2     | cytokine and cytokine re | -0.0374 | 4.85E-01 | 0.0004  | 9.94E-01 |
| TGFBR2    | cytokine and cytokine re | -0.2787 | 1.11E-07 | -0.2633 | 5.83E-07 |
| BMP3      | cytokine and cytokine re | -0.0447 | 4.04E-01 | -0.0101 | 8.51E-01 |
| CXCL12    | cytokine and cytokine re | -0.1784 | 7.84E-04 | -0.1372 | 1.02E-02 |
| TNFSF8    | cytokine and cytokine re | -0.1765 | 8.96E-04 | -0.1221 | 2.23E-02 |
| BMPR2     | cytokine and cytokine re | -0.1177 | 2.75E-02 | -0.1026 | 5.52E-02 |
| IL7R      | cytokine and cytokine re | -0.1851 | 4.91E-04 | -0.1372 | 1.02E-02 |
| ILK       | cytokine and cytokine re | -0.0012 | 9.82E-01 | 0.0176  | 7.43E-01 |
| TGFB11    | cytokine and cytokine re | -0.0918 | 8.58E-02 | -0.0549 | 3.06E-01 |
| BMP5      | cytokine and cytokine re | -0.1467 | 5.91E-03 | -0.1139 | 3.31E-02 |
| BMP6      | cytokine and cytokine re | -0.1225 | 2.17E-02 | -0.0942 | 7.86E-02 |
| BMPER     | cytokine and cytokine re | -0.1948 | 2.40E-04 | -0.1732 | 1.14E-03 |
| CCR4      | cytokine and cytokine re | -0.1389 | 9.19E-03 | -0.0863 | 1.07E-01 |

|          |                          |         |          |         |          |
|----------|--------------------------|---------|----------|---------|----------|
| CCR7     | cytokine and cytokine re | -0.0941 | 7.82E-02 | -0.0267 | 6.19E-01 |
| CX3CL1   | cytokine and cytokine re | -0.2139 | 5.35E-05 | -0.2003 | 1.62E-04 |
| IL11RA   | cytokine and cytokine re | 0.2033  | 1.25E-04 | 0.1860  | 4.69E-04 |
| IL34     | cytokine and cytokine re | -0.0274 | 6.09E-01 | 0.0312  | 5.61E-01 |
| TGFB1    | cytokine and cytokine re | -0.0548 | 3.06E-01 | -0.0022 | 9.67E-01 |
| TGFB3    | cytokine and cytokine re | -0.1000 | 6.13E-02 | -0.0633 | 2.38E-01 |
| TGFBR3   | cytokine and cytokine re | -0.1884 | 3.86E-04 | -0.1860 | 4.70E-04 |
| TNFRSF19 | cytokine and cytokine re | -0.0027 | 9.60E-01 | -0.0098 | 8.55E-01 |
| TNFSF10  | cytokine and cytokine re | -0.0518 | 3.33E-01 | -0.0399 | 4.57E-01 |
| TNFSF14  | cytokine and cytokine re | 0.0940  | 7.87E-02 | 0.1128  | 3.49E-02 |
| BMP4     | cytokine and cytokine re | 0.0253  | 6.36E-01 | 0.0157  | 7.70E-01 |
| BMPR1B   | cytokine and cytokine re | -0.0493 | 3.58E-01 | 0.0026  | 9.61E-01 |
| CCL16    | cytokine and cytokine re | -0.3167 | 1.28E-09 | -0.3310 | 2.16E-10 |
| CSF1     | cytokine and cytokine re | -0.1049 | 4.96E-02 | -0.0473 | 3.78E-01 |
| CSF1R    | cytokine and cytokine re | -0.1458 | 6.20E-03 | -0.0746 | 1.64E-01 |
| CXCL14   | cytokine and cytokine re | -0.0705 | 1.88E-01 | -0.0252 | 6.39E-01 |
| IFNGR1   | cytokine and cytokine re | -0.1416 | 7.90E-03 | -0.1256 | 1.88E-02 |
| IL12B    | cytokine and cytokine re | -0.0531 | 3.22E-01 | -0.0011 | 9.83E-01 |
| IL17RE   | cytokine and cytokine re | 0.1561  | 3.37E-03 | 0.1390  | 9.20E-03 |
| IL28RA   | cytokine and cytokine re | -0.0047 | 9.30E-01 | -0.0130 | 8.09E-01 |
| IL4R     | cytokine and cytokine re | 0.0556  | 2.99E-01 | 0.0930  | 8.24E-02 |
| IL5RA    | cytokine and cytokine re | -0.1301 | 1.47E-02 | -0.0837 | 1.18E-01 |
| IL6ST    | cytokine and cytokine re | -0.1679 | 1.59E-03 | -0.1635 | 2.15E-03 |
| TNFSF12  | cytokine and cytokine re | -0.0232 | 6.65E-01 | 0.0208  | 6.98E-01 |
| BMP7     | cytokine and cytokine re | 0.0957  | 7.33E-02 | 0.1077  | 4.42E-02 |
| BMP8A    | cytokine and cytokine re | 0.2117  | 6.42E-05 | 0.2402  | 5.51E-06 |
| CCL2     | cytokine and cytokine re | -0.1523 | 4.23E-03 | -0.0973 | 6.91E-02 |
| CCR2     | cytokine and cytokine re | -0.1156 | 3.03E-02 | -0.0455 | 3.96E-01 |
| CCR9     | cytokine and cytokine re | -0.0387 | 4.69E-01 | -0.0049 | 9.27E-01 |



|           |                          |         |          |         |          |
|-----------|--------------------------|---------|----------|---------|----------|
| CSF3      | cytokine and cytokine re | -0.1143 | 3.23E-02 | -0.0948 | 7.64E-02 |
| CXCR5     | cytokine and cytokine re | 0.0022  | 9.67E-01 | 0.0718  | 1.80E-01 |
| IFNAR2    | cytokine and cytokine re | 0.0583  | 2.76E-01 | 0.0953  | 7.51E-02 |
| IL17B     | cytokine and cytokine re | 0.0076  | 8.87E-01 | 0.0324  | 5.45E-01 |
| IL2RG     | cytokine and cytokine re | -0.0033 | 9.51E-01 | 0.0984  | 6.60E-02 |
| IL31RA    | cytokine and cytokine re | -0.0130 | 8.08E-01 | -0.0017 | 9.74E-01 |
| IL3RA     | cytokine and cytokine re | -0.0822 | 1.24E-01 | -0.0468 | 3.83E-01 |
| IL6R      | cytokine and cytokine re | 0.0118  | 8.26E-01 | -0.0076 | 8.88E-01 |
| TNFAIP3   | cytokine and cytokine re | 0.0293  | 5.84E-01 | 0.0688  | 1.99E-01 |
| TNFAIP8L2 | cytokine and cytokine re | -0.0450 | 4.01E-01 | 0.0465  | 3.86E-01 |
| TNFRSF11B | cytokine and cytokine re | 0.0436  | 4.15E-01 | 0.0936  | 8.03E-02 |
| CCL17     | cytokine and cytokine re | -0.0368 | 4.92E-01 | 0.0287  | 5.93E-01 |
| CCL22     | cytokine and cytokine re | -0.1249 | 1.92E-02 | -0.0660 | 2.18E-01 |
| CCL23     | cytokine and cytokine re | -0.1505 | 4.72E-03 | -0.1116 | 3.69E-02 |
| CCR5      | cytokine and cytokine re | -0.0790 | 1.40E-01 | 0.0165  | 7.58E-01 |
| CCRL2     | cytokine and cytokine re | -0.0480 | 3.70E-01 | 0.0284  | 5.96E-01 |
| CSF2RA    | cytokine and cytokine re | -0.0144 | 7.88E-01 | 0.0631  | 2.39E-01 |
| CSF2RB    | cytokine and cytokine re | -0.1148 | 3.16E-02 | -0.0330 | 5.38E-01 |
| CXCL2     | cytokine and cytokine re | -0.1421 | 7.65E-03 | -0.1198 | 2.50E-02 |
| CXCR2     | cytokine and cytokine re | -0.0767 | 1.51E-01 | -0.0375 | 4.84E-01 |
| CXCR4     | cytokine and cytokine re | -0.0025 | 9.62E-01 | 0.0847  | 1.14E-01 |
| IFNAR1    | cytokine and cytokine re | -0.2075 | 8.97E-05 | -0.2017 | 1.45E-04 |
| IL10RA    | cytokine and cytokine re | -0.1408 | 8.25E-03 | -0.0724 | 1.76E-01 |
| IL10RB    | cytokine and cytokine re | 0.0618  | 2.48E-01 | 0.0772  | 1.49E-01 |
| IL12A     | cytokine and cytokine re | 0.2515  | 1.82E-06 | 0.3056  | 5.29E-09 |
| IL13RA1   | cytokine and cytokine re | -0.1626 | 2.25E-03 | -0.1514 | 4.53E-03 |
| IL17RC    | cytokine and cytokine re | -0.1943 | 2.51E-04 | -0.1941 | 2.59E-04 |
| IL21R     | cytokine and cytokine re | 0.0268  | 6.16E-01 | 0.1426  | 7.53E-03 |
| IL24      | cytokine and cytokine re | -0.0667 | 2.13E-01 | -0.0245 | 6.48E-01 |

|           |                          |         |          |         |          |
|-----------|--------------------------|---------|----------|---------|----------|
| IL2RB     | cytokine and cytokine re | -0.1291 | 1.55E-02 | -0.0558 | 2.98E-01 |
| IL6       | cytokine and cytokine re | -0.1381 | 9.58E-03 | -0.0852 | 1.12E-01 |
| ILDR1     | cytokine and cytokine re | 0.1737  | 1.09E-03 | 0.1919  | 3.06E-04 |
| TGFA      | cytokine and cytokine re | 0.1087  | 4.18E-02 | 0.1389  | 9.27E-03 |
| TGFBR1    | cytokine and cytokine re | 0.0739  | 1.67E-01 | 0.1164  | 2.95E-02 |
| TGFBRAP1  | cytokine and cytokine re | -0.0115 | 8.30E-01 | -0.0079 | 8.82E-01 |
| TNFRSF10D | cytokine and cytokine re | -0.0493 | 3.58E-01 | -0.0566 | 2.91E-01 |
| TNFRSF13B | cytokine and cytokine re | 0.0333  | 5.34E-01 | 0.1043  | 5.12E-02 |
| TNFRSF21  | cytokine and cytokine re | 0.0215  | 6.88E-01 | 0.0535  | 3.18E-01 |
| TNFSF13   | cytokine and cytokine re | -0.1781 | 8.01E-04 | -0.1350 | 1.15E-02 |
| TNFSF15   | cytokine and cytokine re | 0.0261  | 6.25E-01 | 0.0663  | 2.16E-01 |
| BMPR1A    | cytokine and cytokine re | 0.1024  | 5.52E-02 | 0.0933  | 8.12E-02 |
| CCL3L3    | cytokine and cytokine re | 0.0157  | 7.70E-01 | 0.0394  | 4.63E-01 |
| CCR1      | cytokine and cytokine re | -0.1671 | 1.68E-03 | -0.1049 | 4.99E-02 |
| CCR10     | cytokine and cytokine re | 0.0607  | 2.57E-01 | 0.0883  | 9.92E-02 |
| CCRN4L    | cytokine and cytokine re | -0.0787 | 1.41E-01 | -0.0544 | 3.10E-01 |
| CSF3R     | cytokine and cytokine re | -0.0577 | 2.81E-01 | 0.0256  | 6.33E-01 |
| CXCL6     | cytokine and cytokine re | -0.0638 | 2.33E-01 | -0.0195 | 7.17E-01 |
| CXCR2P1   | cytokine and cytokine re | -0.0799 | 1.35E-01 | -0.0191 | 7.22E-01 |
| CXCR6     | cytokine and cytokine re | -0.0798 | 1.36E-01 | 0.0037  | 9.45E-01 |
| EPOR      | cytokine and cytokine re | 0.1250  | 1.91E-02 | 0.1240  | 2.03E-02 |
| IL10      | cytokine and cytokine re | -0.1173 | 2.79E-02 | -0.0503 | 3.48E-01 |
| IL13RA2   | cytokine and cytokine re | -0.0023 | 9.65E-01 | 0.0410  | 4.44E-01 |
| IL17RA    | cytokine and cytokine re | -0.0121 | 8.21E-01 | 0.0106  | 8.43E-01 |
| IL17RD    | cytokine and cytokine re | 0.0197  | 7.13E-01 | 0.0630  | 2.40E-01 |
| IL17REL   | cytokine and cytokine re | 0.0873  | 1.02E-01 | 0.1281  | 1.65E-02 |
| IL18      | cytokine and cytokine re | -0.1213 | 2.30E-02 | -0.0458 | 3.93E-01 |
| IL18BP    | cytokine and cytokine re | -0.0831 | 1.20E-01 | -0.0117 | 8.28E-01 |
| IL1R2     | cytokine and cytokine re | -0.0042 | 9.38E-01 | 0.0050  | 9.26E-01 |

|             |                          |         |          |         |          |
|-------------|--------------------------|---------|----------|---------|----------|
| IL1RL1      | cytokine and cytokine re | -0.2771 | 1.32E-07 | -0.2502 | 2.14E-06 |
| IL20        | cytokine and cytokine re | -0.0402 | 4.53E-01 | -0.0190 | 7.23E-01 |
| IL20RA      | cytokine and cytokine re | 0.1167  | 2.88E-02 | 0.1418  | 7.88E-03 |
| IL23R       | cytokine and cytokine re | -0.0093 | 8.62E-01 | 0.0154  | 7.74E-01 |
| IL7         | cytokine and cytokine re | -0.1180 | 2.70E-02 | -0.0811 | 1.30E-01 |
| TGFBI       | cytokine and cytokine re | -0.0714 | 1.82E-01 | -0.0848 | 1.13E-01 |
| TNF         | cytokine and cytokine re | -0.0444 | 4.07E-01 | 0.0298  | 5.78E-01 |
| TNFAIP8     | cytokine and cytokine re | -0.0053 | 9.22E-01 | 0.0848  | 1.13E-01 |
| TNFRSF10B   | cytokine and cytokine re | -0.0753 | 1.59E-01 | -0.0703 | 1.90E-01 |
| TNFRSF11A   | cytokine and cytokine re | 0.0905  | 9.04E-02 | 0.1342  | 1.20E-02 |
| TNFRSF14    | cytokine and cytokine re | -0.0725 | 1.76E-01 | -0.0385 | 4.73E-01 |
| TNFRSF1B    | cytokine and cytokine re | -0.1330 | 1.26E-02 | -0.0795 | 1.38E-01 |
| TNFRSF25    | cytokine and cytokine re | 0.1293  | 1.53E-02 | 0.1654  | 1.90E-03 |
| TNFSF11     | cytokine and cytokine re | -0.0568 | 2.89E-01 | -0.0487 | 3.64E-01 |
| BMP2K       | cytokine and cytokine re | -0.1504 | 4.76E-03 | -0.1142 | 3.27E-02 |
| CCL11       | cytokine and cytokine re | -0.0550 | 3.04E-01 | -0.0017 | 9.75E-01 |
| CCL13       | cytokine and cytokine re | -0.0874 | 1.02E-01 | -0.0245 | 6.47E-01 |
| CCL14-CCL15 | cytokine and cytokine re | -0.1260 | 1.82E-02 | -0.1376 | 9.96E-03 |
| CCL15       | cytokine and cytokine re | 0.0382  | 4.76E-01 | 0.0113  | 8.34E-01 |
| CCL5        | cytokine and cytokine re | -0.1204 | 2.41E-02 | -0.0516 | 3.35E-01 |
| CXCL1       | cytokine and cytokine re | 0.0470  | 3.80E-01 | 0.0949  | 7.62E-02 |
| CXCL3       | cytokine and cytokine re | 0.0707  | 1.86E-01 | 0.1197  | 2.51E-02 |
| CXCL5       | cytokine and cytokine re | 0.0640  | 2.32E-01 | 0.1056  | 4.85E-02 |
| CXCL9       | cytokine and cytokine re | -0.0535 | 3.18E-01 | 0.0078  | 8.84E-01 |
| CXCR3       | cytokine and cytokine re | -0.0428 | 4.24E-01 | 0.0464  | 3.86E-01 |
| IL18RAP     | cytokine and cytokine re | -0.1015 | 5.75E-02 | -0.0352 | 5.11E-01 |
| IL1B        | cytokine and cytokine re | -0.0218 | 6.84E-01 | 0.0624  | 2.44E-01 |
| IL1RAP      | cytokine and cytokine re | -0.0066 | 9.02E-01 | 0.0018  | 9.74E-01 |
| IL1RAPL1    | cytokine and cytokine re | 0.0324  | 5.45E-01 | 0.0453  | 3.98E-01 |

|           |                          |         |          |         |          |
|-----------|--------------------------|---------|----------|---------|----------|
| IL1RAPL2  | cytokine and cytokine re | -0.1245 | 1.96E-02 | -0.1179 | 2.75E-02 |
| IL1RL2    | cytokine and cytokine re | -0.0603 | 2.60E-01 | -0.0405 | 4.51E-01 |
| IL20RB    | cytokine and cytokine re | 0.1131  | 3.41E-02 | 0.1357  | 1.10E-02 |
| IL22RA1   | cytokine and cytokine re | 0.1442  | 6.80E-03 | 0.1438  | 7.04E-03 |
| IL22RA2   | cytokine and cytokine re | 0.0271  | 6.13E-01 | 0.0700  | 1.91E-01 |
| IL26      | cytokine and cytokine re | 0.0385  | 4.72E-01 | 0.0829  | 1.21E-01 |
| IL27RA    | cytokine and cytokine re | 0.1167  | 2.89E-02 | 0.1818  | 6.32E-04 |
| IL9R      | cytokine and cytokine re | 0.0227  | 6.72E-01 | 0.0681  | 2.04E-01 |
| TNFRSF10A | cytokine and cytokine re | -0.1087 | 4.19E-02 | -0.0917 | 8.65E-02 |
| TNFRSF10C | cytokine and cytokine re | -0.0303 | 5.72E-01 | -0.0079 | 8.83E-01 |
| TNFRSF13C | cytokine and cytokine re | 0.1302  | 1.46E-02 | 0.1955  | 2.34E-04 |
| TNFRSF1A  | cytokine and cytokine re | -0.1330 | 1.26E-02 | -0.1167 | 2.90E-02 |
| XCL1      | cytokine and cytokine re | 0.0367  | 4.93E-01 | 0.0999  | 6.19E-02 |
| XCL2      | cytokine and cytokine re | -0.0189 | 7.24E-01 | 0.0475  | 3.75E-01 |
| BMP1      | cytokine and cytokine re | -0.2029 | 1.30E-04 | -0.2065 | 9.93E-05 |
| BMP10     | cytokine and cytokine re | -0.1357 | 1.09E-02 | -0.1158 | 3.03E-02 |
| BMP2      | cytokine and cytokine re | -0.0325 | 5.44E-01 | -0.0180 | 7.37E-01 |
| CCL24     | cytokine and cytokine re | -0.0808 | 1.31E-01 | -0.0496 | 3.55E-01 |
| CCL26     | cytokine and cytokine re | 0.1730  | 1.14E-03 | 0.2150  | 5.01E-05 |
| CCL28     | cytokine and cytokine re | 0.0723  | 1.76E-01 | 0.0801  | 1.35E-01 |
| CCL4      | cytokine and cytokine re | -0.1020 | 5.61E-02 | -0.0259 | 6.29E-01 |
| CCL8      | cytokine and cytokine re | -0.0725 | 1.75E-01 | -0.0248 | 6.44E-01 |
| CSF2      | cytokine and cytokine re | 0.0846  | 1.14E-01 | 0.1266  | 1.78E-02 |
| CXCL10    | cytokine and cytokine re | -0.0535 | 3.18E-01 | -0.0068 | 9.00E-01 |
| CXCL11    | cytokine and cytokine re | -0.0706 | 1.87E-01 | -0.0210 | 6.96E-01 |
| CXCL13    | cytokine and cytokine re | 0.0582  | 2.77E-01 | 0.1117  | 3.68E-02 |
| CXCL16    | cytokine and cytokine re | 0.0088  | 8.69E-01 | 0.0309  | 5.64E-01 |
| CXCL17    | cytokine and cytokine re | 0.0627  | 2.41E-01 | 0.0752  | 1.61E-01 |
| IL12RB1   | cytokine and cytokine re | -0.0708 | 1.86E-01 | 0.0233  | 6.63E-01 |

|          |                          |         |          |         |          |
|----------|--------------------------|---------|----------|---------|----------|
| IL17RB   | cytokine and cytokine re | 0.1917  | 3.05E-04 | 0.1845  | 5.21E-04 |
| IL18R1   | cytokine and cytokine re | -0.1460 | 6.15E-03 | -0.1029 | 5.44E-02 |
| IL1F9    | cytokine and cytokine re | 0.1106  | 3.84E-02 | 0.1037  | 5.26E-02 |
| IL2      | cytokine and cytokine re | 0.0258  | 6.30E-01 | 0.0567  | 2.90E-01 |
| IL23A    | cytokine and cytokine re | -0.0577 | 2.81E-01 | -0.0275 | 6.08E-01 |
| IL2RA    | cytokine and cytokine re | -0.0240 | 6.54E-01 | 0.0742  | 1.66E-01 |
| ILKAP    | cytokine and cytokine re | 0.2683  | 3.36E-07 | 0.2747  | 1.78E-07 |
| TNFAIP2  | cytokine and cytokine re | 0.0834  | 1.19E-01 | 0.1205  | 2.42E-02 |
| TNFAIP6  | cytokine and cytokine re | 0.0525  | 3.27E-01 | 0.1128  | 3.50E-02 |
| TNFRSF4  | cytokine and cytokine re | 0.1376  | 9.87E-03 | 0.1928  | 2.84E-04 |
| TNFRSF6B | cytokine and cytokine re | 0.0769  | 1.50E-01 | 0.1105  | 3.89E-02 |
| TNFSF13B | cytokine and cytokine re | -0.0846 | 1.14E-01 | -0.0028 | 9.58E-01 |
| TNFSF18  | cytokine and cytokine re | -0.0601 | 2.61E-01 | -0.0331 | 5.37E-01 |
| BMP8B    | cytokine and cytokine re | 0.2278  | 1.63E-05 | 0.2261  | 1.95E-05 |
| CCL18    | cytokine and cytokine re | -0.1415 | 7.94E-03 | -0.0926 | 8.37E-02 |
| CCL20    | cytokine and cytokine re | 0.1877  | 4.06E-04 | 0.2190  | 3.59E-05 |
| CCL27    | cytokine and cytokine re | 0.1678  | 1.61E-03 | 0.1795  | 7.40E-04 |
| CCL4L2   | cytokine and cytokine re | -0.0088 | 8.70E-01 | 0.0633  | 2.37E-01 |
| CCR3     | cytokine and cytokine re | 0.0780  | 1.45E-01 | 0.1210  | 2.36E-02 |
| CCR8     | cytokine and cytokine re | -0.0200 | 7.08E-01 | 0.0463  | 3.88E-01 |
| IFNG     | cytokine and cytokine re | -0.0017 | 9.74E-01 | 0.0659  | 2.19E-01 |
| IFNGR2   | cytokine and cytokine re | 0.1868  | 4.35E-04 | 0.2263  | 1.93E-05 |
| IL15RA   | cytokine and cytokine re | 0.0421  | 4.32E-01 | 0.1020  | 5.65E-02 |
| IL1F7    | cytokine and cytokine re | 0.2478  | 2.61E-06 | 0.2567  | 1.13E-06 |
| IL1RN    | cytokine and cytokine re | -0.0734 | 1.70E-01 | -0.0650 | 2.25E-01 |
| IL27     | cytokine and cytokine re | -0.1580 | 2.99E-03 | -0.1665 | 1.77E-03 |
| IL32     | cytokine and cytokine re | -0.1477 | 5.56E-03 | -0.1228 | 2.16E-02 |
| IL4I1    | cytokine and cytokine re | 0.1036  | 5.26E-02 | 0.2026  | 1.36E-04 |
| IL5      | cytokine and cytokine re | 0.0633  | 2.37E-01 | 0.0594  | 2.68E-01 |

|                 |                          |         |          |         |          |
|-----------------|--------------------------|---------|----------|---------|----------|
| IL8             | cytokine and cytokine re | 0.0344  | 5.20E-01 | 0.0804  | 1.33E-01 |
| ILDR2           | cytokine and cytokine re | 0.0806  | 1.32E-01 | 0.0922  | 8.49E-02 |
| ILF3            | cytokine and cytokine re | 0.3800  | 1.68E-13 | 0.3776  | 2.64E-13 |
| ILVBL           | cytokine and cytokine re | -0.1956 | 2.27E-04 | -0.2094 | 7.90E-05 |
| TNFRSF17        | cytokine and cytokine re | -0.0347 | 5.17E-01 | 0.0390  | 4.67E-01 |
| TNFRSF18        | cytokine and cytokine re | 0.0829  | 1.21E-01 | 0.1717  | 1.26E-03 |
| TNFRSF8         | cytokine and cytokine re | -0.0503 | 3.48E-01 | 0.0490  | 3.61E-01 |
| TNFSF12-TNFSF13 | cytokine and cytokine re | -0.0883 | 9.85E-02 | -0.0308 | 5.66E-01 |
| TNFSF4          | cytokine and cytokine re | 0.2993  | 1.07E-08 | 0.3064  | 4.84E-09 |
| CCL25           | cytokine and cytokine re | 0.1248  | 1.93E-02 | 0.1203  | 2.45E-02 |
| CCL3L1          | cytokine and cytokine re | 0.0686  | 2.00E-01 | 0.1156  | 3.06E-02 |
| CXCR1           | cytokine and cytokine re | -0.1047 | 5.00E-02 | -0.0779 | 1.46E-01 |
| EPO             | cytokine and cytokine re | 0.1397  | 8.75E-03 | 0.1616  | 2.43E-03 |
| IL12RB2         | cytokine and cytokine re | -0.1550 | 3.61E-03 | -0.1187 | 2.64E-02 |
| IL13            | cytokine and cytokine re | 0.0453  | 3.98E-01 | 0.0609  | 2.56E-01 |
| IL15            | cytokine and cytokine re | -0.0542 | 3.12E-01 | 0.0285  | 5.95E-01 |
| IL29            | cytokine and cytokine re | -0.0077 | 8.86E-01 | 0.0251  | 6.40E-01 |
| ILF2            | cytokine and cytokine re | 0.5512  | 2.77E-29 | 0.5525  | 2.33E-29 |
| TNFAIP1         | cytokine and cytokine re | -0.0866 | 1.05E-01 | -0.0961 | 7.25E-02 |
| TNFAIP8L1       | cytokine and cytokine re | -0.2070 | 9.35E-05 | -0.2046 | 1.16E-04 |
| TNFRSF12A       | cytokine and cytokine re | -0.0546 | 3.08E-01 | -0.0411 | 4.43E-01 |
| TNFRSF9         | cytokine and cytokine re | 0.0102  | 8.49E-01 | 0.0685  | 2.01E-01 |
| TNFSF9          | cytokine and cytokine re | 0.1600  | 2.65E-03 | 0.2116  | 6.59E-05 |
| CCL3            | cytokine and cytokine re | -0.0882 | 9.88E-02 | -0.0266 | 6.20E-01 |
| CCL7            | cytokine and cytokine re | -0.0840 | 1.16E-01 | -0.0422 | 4.31E-01 |
| IL11            | cytokine and cytokine re | 0.2062  | 9.98E-05 | 0.2296  | 1.44E-05 |
| IL17C           | cytokine and cytokine re | 0.0363  | 4.98E-01 | 0.0498  | 3.53E-01 |
| IL1A            | cytokine and cytokine re | 0.0793  | 1.38E-01 | 0.1077  | 4.40E-02 |
| CXCL10          | pro-inflammatory genes   | -0.0535 | 3.18E-01 | -0.0068 | 9.00E-01 |

|        |                        |         |          |         |          |
|--------|------------------------|---------|----------|---------|----------|
| CXCL9  | pro-inflammatory genes | -0.0535 | 3.18E-01 | 0.0078  | 8.84E-01 |
| IFNG   | pro-inflammatory genes | -0.0017 | 9.74E-01 | 0.0659  | 2.19E-01 |
| GZMB   | pro-inflammatory genes | -0.1180 | 2.70E-02 | -0.0699 | 1.92E-01 |
| CXCL13 | pro-inflammatory genes | 0.0582  | 2.77E-01 | 0.1117  | 3.68E-02 |
| STAT1  | pro-inflammatory genes | 0.0456  | 3.94E-01 | 0.0954  | 7.47E-02 |
| IRF1   | pro-inflammatory genes | 0.0257  | 6.31E-01 | 0.1074  | 4.47E-02 |
| CCL5   | pro-inflammatory genes | -0.1204 | 2.41E-02 | -0.0516 | 3.35E-01 |
| GNLY   | pro-inflammatory genes | -0.0378 | 4.80E-01 | -0.0003 | 9.95E-01 |
| TBX21  | pro-inflammatory genes | -0.1340 | 1.20E-02 | -0.0763 | 1.54E-01 |
| CD8B   | pro-inflammatory genes | -0.0556 | 2.99E-01 | 0.0240  | 6.55E-01 |
| PRF1   | pro-inflammatory genes | -0.1626 | 2.24E-03 | -0.1094 | 4.07E-02 |
| IL12A  | pro-inflammatory genes | 0.2515  | 1.82E-06 | 0.3056  | 5.29E-09 |
| IL12B  | pro-inflammatory genes | -0.0531 | 3.22E-01 | -0.0011 | 9.83E-01 |
| CD19   | pro-inflammatory genes | 0.0837  | 1.18E-01 | 0.1519  | 4.40E-03 |
